# Supplementary material for: The evolution of inflorescence diversity in the nightshades and heterochrony during meristem maturation
Source: PubMed Central journal article supplement — Genome Res. 2016 Dec;26(12):1676–86. doi: 10.1101/gr.207837.116 (PMC5131819; doi:10.1101/gr.207837.116), 2016-12

# Supplemental Figure S14

**A***Spe, TM - S in situ (10x)**Spe, LTM  
S in situ (10x)**Spe, FM  
S in situ (10x)*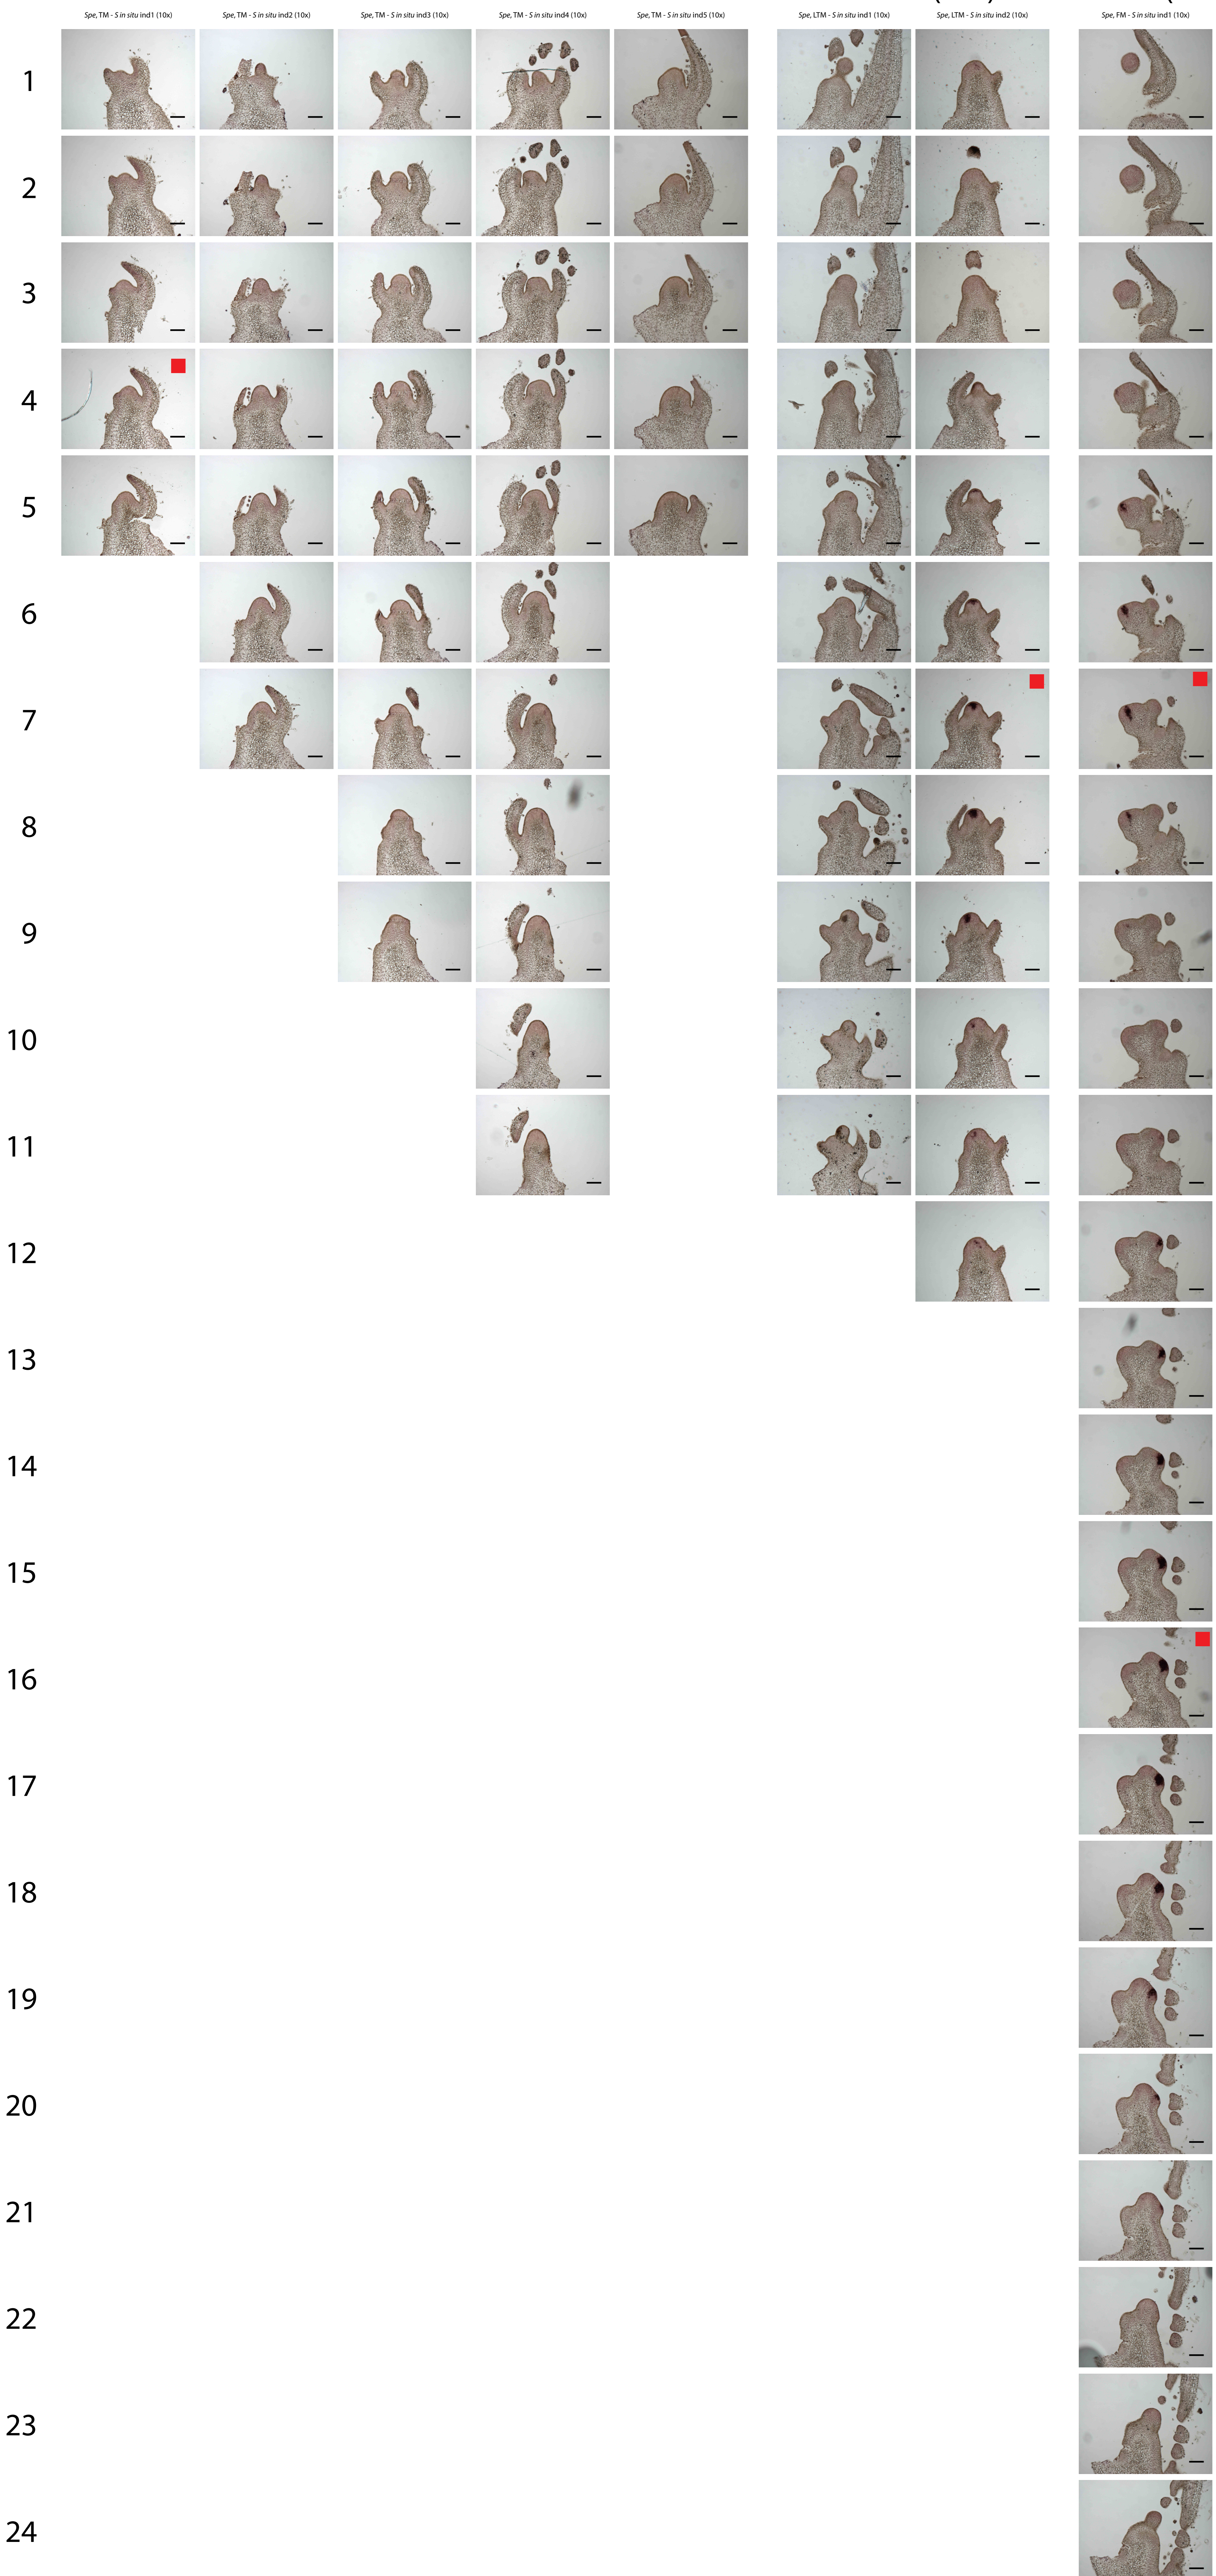**B***Spe, TM - AN in situ (10x)**Spe, LTM - AN in situ (10x)**Spe, FM - AN in situ (10x)*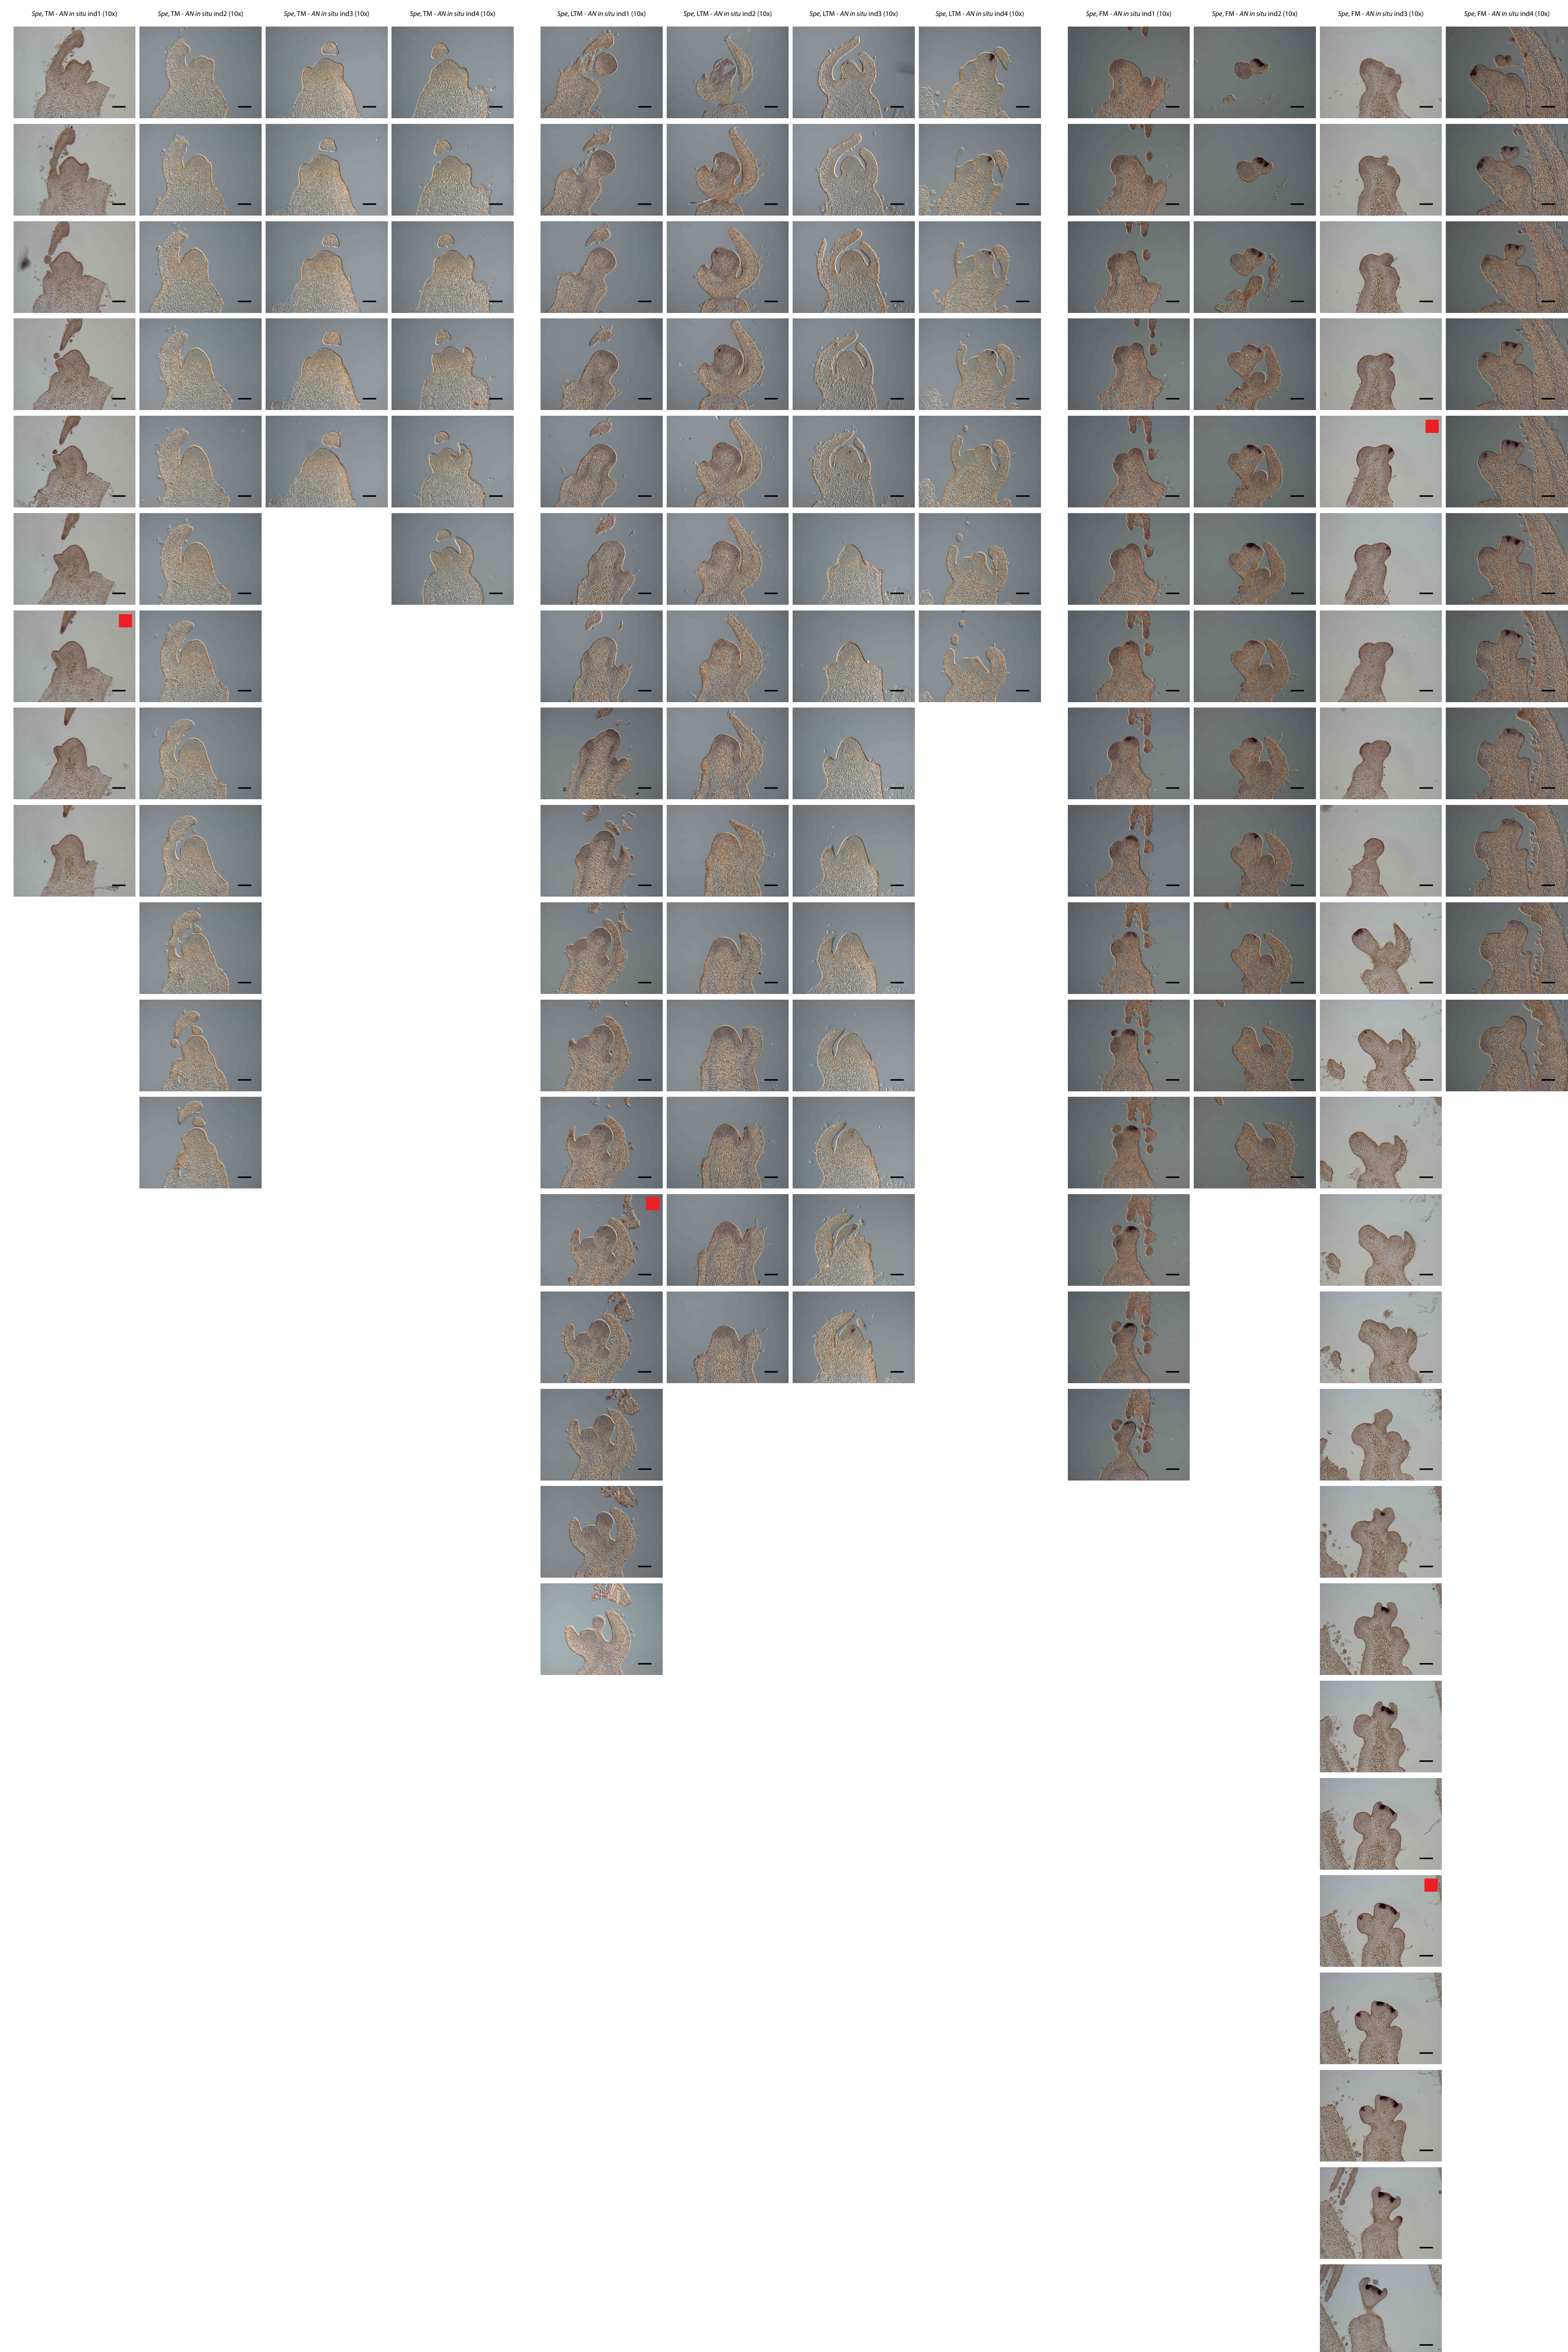

Supplement: supp_gr.207837.116_Supplemental_Fig_S14.pdf [file supp_gr.207837.116_Supplemental_Fig_S14.pdf]
