# Supplementary material for: The evolution of inflorescence diversity in the nightshades and heterochrony during meristem maturation
Source: HighWire-hosted journal article supplement (doi:10.1101/gr.207837.116), 2016-11-07
Supplement: Supplemental_Table_S1.xlsx [file Supplemental_Table_S1.xlsx]

## Sheet: Sheet1
Supplemental Table S1. List of Solanaceae species surveyed for inflorescence diversity.
Species	Accesssion no.	Inflorescence Phenotype
Atropa belladonna	824750012	Linear, 2 to 4 flowers
Browallia americana	894750061	Linear, 2 to 4 flowers
Browallia demissa #	944750210	Single-flowered
Browallia viscosa #	944750039	Single-flowered
Capsicum annuum cv. MAOR #*	PI 653624	Single-flowered
Capsicum frutescens	924750057	Single-flowered
Cestrum fasciculatum #	944750210	Moderately branched
Cestrum parqui #	804750021	Moderately branched
Datura stramonium	804750035	Single-flowered
Hyoscyamus niger	884750005	Linear, 2 to 4 flowers
Jaborosa sativa #	914750052	Linear, 5 or more flowers
Jaltomata procumbens	934750151	Linear, 5 or more flowers
Lycium barbarum	914750024	Linear, 2 to 4 flowers
Nicotiana benthamiana #*	Nb-1	Single-flowered
Nicotiana paniculata #	A14750222	Strongly branched
Nicotiana rustica #	964750121	Moderately branched
Nicotiana tabacum #	A34750332	Moderately branched
Nicotiana tomentosa	914750067	Moderately branched
Nolana humifusa #	934750109	Single-flowered
Nolana paradoxa #	934750175	Single-flowered
Petunia nyctaginiflora #	924750078	Single-flowered
Physalis ixocarpa	894750257	Single-flowered
Physalis mexicana	904750216	Single-flowered
Physalis peruviana #	874750001	Single-flowered
Physalis philadelphica #	904750223	Single-flowered
Salpichria origanifolia #	924750092	Linear, 2 to 4 flowers
Salpiglossis sinuata	894750117	Linear, 5 or more flowers
Schizanthus gilliesii	954750036	Linear, 5 or more flowers
Schizanthus pinnatus	804750098	Linear, 5 or more flowers
Schwenkia americana	884750248	Linear, 5 or more flowers
Solanum abutiloides #	884750019	Moderately branched
Solanum adscendens #	994750085	Linear, 5 or more flowers
Solanum aethiopicum	804750136	Linear, 2 to 4 flowers
Solanum ajanhuiri	924750001	Weakly branched
Solanum americanum	904750023	Linear, 5 or more flowers
Solanum amotapense #	954750012	Weakly branched
Solanum anguivi	904750142	Linear, 5 or more flowers
Solanum aviculare #	844750003	Moderately branched
Solanum bahamense	944750187	Linear, 5 or more flowers
Solanum basendopogon	904750165	Moderately branched
Solanum bonariense #	904750194	Moderately branched
Solanum brevidens	904750168	Moderately branched
Solanum campanulatum #	A24750135	Linear, 5 or more flowers
Solanum candidum #	864750001	Linear, 5 or more flowers
Solanum capsicoides #	894750114	Linear, 2 to 4 flowers
Solanum carolinense #	894750095	Linear, 5 or more flowers
Solanum citrullifolium #	894750197	Linear, 5 or more flowers
Solanum cleistogamum #	904750140	Linear, 2 to 4 flowers
Solanum conditum	974750022	Linear, 5 or more flowers
Solanum conglobatum #	994750090	Moderately branched
Solanum crinitipes #	904750006	Moderately branched
Solanum crispum #	894750342	Strongly branched
Solanum dasyphyllum	724750113	Linear, 5 or more flowers
Solanum dulcamaroides	814750045	Weakly branched
Solanum echinatum #	954750022	Linear, 5 or more flowers
Solanum elaeagnifolium #	A24750026	Linear, 5 or more flowers
Solanum erianthum	904750217	Weakly branched
Solanum fiebrigii	904750200	Linear, 5 or more flowers
Solanum fraxinifolium #	904750201	Weakly branched
Solanum fructotecto	904750154	Linear, 5 or more flowers
Solanum giganteum #	894750194	Strongly branched
Solanum glaucophyllum #	924750136	Weakly branched
Solanum granuloso-leprosum #	A44750277	Strongly branched
Solanum hastifolium	944750142	Linear, 2 to 4 flowers
Solanum hirtum	904750158	Linear, 5 or more flowers
Solanum incanum #	954750118	Linear, 5 or more flowers
Solanum lidii	884750193	Linear, 2 to 4 flowers
Solanum linnaeanum	884750056	Linear, 5 or more flowers
Solanum lycopersicum cv. M82 #*	LA3475	Linear, 5 or more flowers
Solanum macrocarpon	874750022	Linear, 2 to 4 flowers
Solanum mammosum	904750004	Linear, 5 or more flowers
Solanum mauritianum #	804750172	Weakly branched
Solanum melongena #	954750111	Linear, 2 to 4 flowers
Solanum mitlense #	944750196	Strongly branched
Solanum ochranthum #	904750079	Weakly branched
Solanum palitans #	904750206	Linear, 5 or more flowers
Solanum peruvianum #*	LA0103	Weakly branched
Solanum platense	944750217	Linear, 2 to 4 flowers
Solanum prinophyllum #*	904750171	Linear, 2 to 4 flowers
Solanum pseudocapsicum #	804750117	Single-flowered
Solanum pubigerum #	814750041	Moderately branched
Solanum pyracanthos #	944750208	Linear, 5 or more flowers
Solanum renschii	944750257	Moderately branched
Solanum rubetorum #	944750148	Linear, 5 or more flowers
Solanum saponaceum #	824750017	Moderately branched
Solanum seaforthianum #	884750073	Strongly branched
Solanum sisymbriifolium #	894750017	Linear, 5 or more flowers
Solanum stramonifolium #	904750184	Linear, 5 or more flowers
Solanum terminale	814750072	Moderately branched
Solanum torvum #	814750073	Strongly branched
Solanum tridynamum #	904750179	Linear, 5 or more flowers
Solanum triflorum	924750074	Single-flowered
Solanum tripartitum #	884750218	Weakly branched
Solanum turneroides #	A14750540	Linear, 2 to 4 flowers
Solanum villosum	814750090	Linear, 5 or more flowers
Withania somnifera #	894750106	Linear, 5 or more flowers
* Species used in this study
# Images for these species available from http://lippmannsf.labsites.cshl.edu/species/
