# Supplementary material for: The evolution of inflorescence diversity in the nightshades and heterochrony during meristem maturation
Source: HighWire-hosted journal article supplement (doi:10.1101/gr.207837.116), 2016-11-07
Supplement: Supplemental_Table_S3.xlsx [file Supplemental_Table_S3.xlsx]

## Sheet: Sheet1
Supplemental Table S3. Information on RNA sequencing reads such as sequencing platform, library kit used, total number of reads, number of mapped reads, and proportion of mapped reads.
Species	Library Kit Used	Stage	Biological Replicate	StageRep	Species_StageRep	Barcode	Sequencer	Read Length	Total Paired Reads	Mean Insert Size	Reads Pass Filter (Trimmomatic)	Percent Pass Filter (Trimmomatic)	Aligned Pairs	Percent Aligned Pairs	High Quality Aligned Pairs	Percent High Quality (total - multiple - discordant) Aligned Pairs	Feature (htseq-count) Aligned Pairs	Percent feature Aligned Pairs
N. benthamiana	Home made protocol (NEB enzyme based )	MVM	1	MVM1	Nbenth_MVM1	full lane	GAIIx	50bp	15287517	131.24	14127994	0.924152	13170998	0.861552	10336098	0.676114	9220737	0.603155
N. benthamiana	Home made protocol (NEB enzyme based )	MVM	2	MVM2	Nbenth_MVM2	full lane	GAIIx	50bp	14804414	132.547	13663146	0.92291	12696750	0.857633	9944348	0.671715	8886592	0.600266
N. benthamiana	Home made protocol (NEB enzyme based )	LVM	1	LVM1	Nbenth_LVM1	full lane	GAIIx	50bp	17719605	179.914	16830490	0.949823	15750076	0.88885	9215293	0.520062	9231407	0.520971
N. benthamiana	Home made protocol (NEB enzyme based )	LVM	2	LVM2	Nbenth_LVM2	full lane	GAIIx	50bp	29787186	142.576	28482101	0.956186	26875650	0.902255	20959408	0.703638	18763965	0.629934
N. benthamiana	Home made protocol (NEB enzyme based )	TM	1	TM1	Nbenth_TM1	full lane	GAIIx	50bp	24210641	111.987	23229093	0.959458	22046299	0.910604	17472118	0.721671	15248783	0.629838
N. benthamiana	Home made protocol (NEB enzyme based )	TM	2	TM2	Nbenth_TM2	full lane	GAIIx	50bp	25420775	129.948	23726881	0.933366	22102029	0.869447	17199551	0.676594	15429111	0.606949
N. benthamiana	Home made protocol (NEB enzyme based )	FM	1	FM1	Nbenth_FM1	full lane	GAIIx	50bp	25158118	171.017	23735059	0.943435	22240508	0.884029	13398310	0.532564	13541642	0.538261
N. benthamiana	Home made protocol (NEB enzyme based )	FM	2	FM2	Nbenth_FM2	full lane	GAIIx	50bp	12043387	127.228	11640796	0.966572	10811468	0.89771	8435485	0.700425	7633887	0.633865
S. lycopersicum cv. M82	Home made protocol (NEB enzyme based )	EVM	1	EVM1	M82_EVM1	full lane	GAIIx	50bp	12963617	216.306	12468260	0.961789	11662376	0.899624	10614454	0.818788	10614578	0.818798
S. lycopersicum cv. M82	Home made protocol (NEB enzyme based )	EVM	2	EVM2	M82_EVM2	full lane	GAIIx	50bp	35695781	246.689	35137127	0.98435	32926096	0.922409	28941007	0.810768	29139387	0.816326
S. lycopersicum cv. M82	Home made protocol (NEB enzyme based )	MVM	1	MVM1	M82_MVM1	full lane	GAIIx	50bp	7864348	226.106	7644687	0.972069	7181608	0.913185	6400511	0.813864	6412114	0.81534
S. lycopersicum cv. M82	Home made protocol (NEB enzyme based )	MVM	2	MVM2	M82_MVM2	full lane	GAIIx	50bp	32853343	252.813	32384626	0.985733	30254144	0.920885	26337327	0.801664	26774597	0.814973
S. lycopersicum cv. M82	Home made protocol (NEB enzyme based )	LVM	1	LVM1	M82_LVM1	full lane	GAIIx	50bp	11362761	229.053	11116031	0.978286	10496021	0.923721	9415624	0.828639	9428056	0.829733
S. lycopersicum cv. M82	Home made protocol (NEB enzyme based )	LVM	2	LVM2	M82_LVM2	full lane	GAIIx	50bp	18676437	243.083	18491915	0.99012	17272944	0.924852	15000689	0.803188	15216026	0.814718
S. lycopersicum cv. M82	Home made protocol (NEB enzyme based )	TM	1	TM1	M82_TM1	full lane	GAIIx	50bp	22315284	251.84	21289847	0.954048	20201103	0.905259	17336213	0.776876	17482081	0.783413
S. lycopersicum cv. M82	Home made protocol (NEB enzyme based )	TM	2	TM2	M82_TM2	full lane	GAIIx	50bp	40954195	249.697	40127847	0.979823	38225411	0.93337	34334228	0.838357	33720047	0.82336
S. lycopersicum cv. M82	Home made protocol (NEB enzyme based )	FM	1	FM1	M82_FM1	full lane	GAIIx	50bp	11252112	271.33	10976651	0.975519	10387117	0.923126	8879026	0.789099	9065791	0.805697
S. lycopersicum cv. M82	Home made protocol (NEB enzyme based )	FM	2	FM2	M82_FM2	full lane	GAIIx	50bp	42439565	241.655	41498015	0.977814	39475615	0.930161	34356875	0.809548	34507187	0.81309
S. lycopersicum cv. M82	Home made protocol (NEB enzyme based )	SIM	1	SIM1	M82_SIM1	full lane	GAIIx	50bp	14596176	237.64	14123209	0.967597	13371504	0.916096	11591197	0.794126	11671615	0.799635
S. lycopersicum cv. M82	Home made protocol (NEB enzyme based )	SIM	2	SIM2	M82_SIM2	full lane	GAIIx	50bp	38525450	258.372	37699656	0.978565	35849745	0.930547	31910906	0.828307	31845804	0.826617
S. peruvianum	Home made protocol (NEB enzyme based )	MVM	1	MVM1	peru_MVM1	full lane	GAIIx	50bp	28623049	162.522	27835550	0.972487	24329646	0.850002	22428185	0.783571	23567241	0.823366
S. peruvianum	Home made protocol (NEB enzyme based )	MVM	2	MVM2	peru_MVM2	full lane	GAIIx	50bp	29720624	162.34	28937264	0.973643	25376292	0.853828	23402986	0.787433	24507924	0.82461
S. peruvianum	Home made protocol (NEB enzyme based )	LVM	1	LVM1	peru_LVM1	full lane	GAIIx	50bp	24737995	169.167	23656194	0.95627	21187029	0.856457	19720824	0.797188	20510703	0.829117
S. peruvianum	Home made protocol (NEB enzyme based )	LVM	2	LVM2	peru_LVM2	full lane	GAIIx	50bp	26063644	168.125	25185874	0.966322	22600704	0.867135	20988449	0.805277	21813260	0.836923
S. peruvianum	Home made protocol (NEB enzyme based )	TM	1	TM1	peru_TM1	full lane	GAIIx	50bp	25025479	125.014	22638340	0.904612	20125337	0.804194	18922559	0.756132	19365520	0.773832
S. peruvianum	Home made protocol (NEB enzyme based )	TM	2	TM2	peru_TM2	full lane	GAIIx	50bp	25186793	124.458	22985802	0.912613	20484316	0.813296	19238116	0.763818	19665187	0.780774
S. peruvianum	Home made protocol (NEB enzyme based )	FM	1	FM1	peru_FM1	full lane	GAIIx	50bp	18248830	137.814	17186392	0.94178	15271547	0.836851	14247156	0.780716	14800129	0.811018
S. peruvianum	Home made protocol (NEB enzyme based )	FM	2	FM2	peru_FM2	full lane	GAIIx	50bp	20456652	137.746	19573804	0.956843	17459107	0.853468	16270400	0.79536	16852910	0.823835
S. peruvianum	Home made protocol (NEB enzyme based )	SIM	1	SIM1	peru_SIM1	full lane	GAIIx	50bp	28100042	141.412	25075758	0.892374	22359841	0.795723	20727580	0.737635	21441289	0.763034
S. peruvianum	Home made protocol (NEB enzyme based )	SIM	2	SIM2	peru_SIM2	full lane	GAIIx	50bp	27911735	140.548	25108058	0.899552	22463694	0.804812	20784594	0.744654	21462409	0.768939
S. prinophyllum	NEBNext® Ultra™ RNA Library Prep	MVM	1	MVM1	Sprino_OMA_pairwise_MVM1	ACAGTG	HiSeq 2000	100bp	44204572	187.778	41416868	0.936936	18864227	0.426748	7199239	0.162862	6058775	0.137062
S. prinophyllum	NEBNext® Ultra™ RNA Library Prep	MVM	2	MVM2	Sprino_OMA_pairwise_MVM2	TGACCA	HiSeq 2000	100bp	53052137	194.685	50321555	0.94853	23148541	0.436336	8813095	0.166121	7336112	0.138281
S. prinophyllum	NEBNext® Ultra™ RNA Library Prep	TM	1	TM1	Sprino_OMA_pairwise_TM1	GCCAAT	HiSeq 2000	100bp	60497563	185.131	56066016	0.926748	25083867	0.414626	9519157	0.157348	8051640	0.13309
S. prinophyllum	NEBNext® Ultra™ RNA Library Prep	TM	2	TM2	Sprino_OMA_pairwise_TM2	ACAGTG	HiSeq 2000	100bp	52063625	199.744	49275149	0.946441	21933705	0.421287	8371948	0.160802	6929718	0.133101
S. prinophyllum	NEBNext® Ultra™ RNA Library Prep	FM	1	FM1	Sprino_OMA_pairwise_FM1	CAGATC	HiSeq 2000	100bp	61120337	188.132	56921106	0.931296	25455021	0.416474	9623118	0.157445	8054218	0.131776
S. prinophyllum	NEBNext® Ultra™ RNA Library Prep	FM	2	FM2	Sprino_OMA_pairwise_FM2	CTTGTG	HiSeq 2000	100bp	55356910	187.377	51821901	0.936142	23753805	0.429103	8927679	0.161275	7508752	0.135643
S. prinophyllum	NEBNext® Ultra™ RNA Library Prep	SIM	1	SIM1	Sprino_OMA_pairwise_SIM1	CTTGTA	HiSeq 2000	100bp	46058453	183.994	42459952	0.921871	18943518	0.411293	7264435	0.157722	6175427	0.134078
S. prinophyllum	NEBNext® Ultra™ RNA Library Prep	SIM	2	SIM2	Sprino_OMA_pairwise_SIM2	GCCAAT	HiSeq 2000	100bp	40691822	186.197	35988504	0.884416	16416436	0.403433	6251957	0.153642	5285132	0.129882
C. annuum	Epicentre ScriptSeq v2	MVM	1	MVM1	Can_bowtie2_MVM1	GCCAAT	HiSeq 2000	100bp	39377346	182.839	29418260	0.747086	10561037	0.268201	8297607	0.21072	9569920	0.243031
C. annuum	Epicentre ScriptSeq v2	MVM	2	MVM2	Can_bowtie2_MVM2	CAGATC	HiSeq 2000	100bp	46311696	184.742	34971539	0.755134	13350967	0.288285	10636981	0.229682	12279663	0.265153
C. annuum	Epicentre ScriptSeq v2	TM	1	TM1	Can_bowtie2_TM1	GATCAG	HiSeq 2000	100bp	58374009	185.403	47226460	0.809032	16899291	0.2895	13387724	0.229344	15426113	0.264263
C. annuum	Epicentre ScriptSeq v2	TM	2	TM2	Can_bowtie2_TM2	TAGCTT	HiSeq 2000	100bp	59994452	181.508	48916325	0.815347	17385552	0.289786	13866558	0.231131	15974181	0.266261
C. annuum	Epicentre ScriptSeq v2	FM	1	FM1	Can_bowtie2_FM1	GGCTAC	HiSeq 2000	100bp	23336423	178.118	19431756	0.832679	7169350	0.307217	5748056	0.246313	6650346	0.284977
C. annuum	Epicentre ScriptSeq v2	FM	2	FM2	Can_bowtie2_FM2	GGCTAC	HiSeq 2000	100bp	29044564	175.268	24145411	0.831323	9110301	0.313666	7336237	0.252586	8501130	0.292693
