# Supplementary material for: The evolution of inflorescence diversity in the nightshades and heterochrony during meristem maturation
Source: HighWire-hosted journal article supplement (doi:10.1101/gr.207837.116), 2016-11-07
Supplement: Supplemental_Table_S5.xlsx [file Supplemental_Table_S5.xlsx]

## Sheet: S. lycopersicum
geneid	EVM1	EVM2	MVM1	MVM2	LVM1	LVM2	TM1	TM2	FM1	FM2	SIM1	SIM2
Solyc00g005000.2.1	0	1	0	0	0	0	0	0	0	0	0	0
Solyc00g005020.1.1	0	0	0	0	0	0	0	0	0	0	0	0
Solyc00g005040.2.1	4	13	4	10	4	5	2	15	0	7	1	15
Solyc00g005050.2.1	298	840	199	640	194	392	457	856	196	744	283	669
Solyc00g005060.1.1	0	0	0	0	0	0	0	0	0	0	0	0
Solyc00g005070.1.1	0	0	0	0	0	0	0	0	0	0	0	0
Solyc00g005080.1.1	0	0	0	0	0	0	0	0	0	0	0	0
Solyc00g005090.1.1	0	0	0	0	0	0	0	0	0	0	0	0
Solyc00g005100.1.1	0	0	0	0	0	0	0	0	0	0	0	0
Solyc00g005110.1.1	0	0	0	0	0	0	0	0	0	0	0	0
Solyc00g005120.1.1	0	0	0	0	0	0	0	0	0	0	0	0
Solyc00g005130.1.1	0	0	0	0	0	0	0	0	0	0	0	0
Solyc00g005140.1.1	0	0	0	0	0	0	0	0	0	0	0	0
Solyc00g005150.1.1	0	0	0	0	0	0	0	0	0	0	0	0
Solyc00g005160.1.1	0	0	0	0	0	0	0	0	0	0	0	0
Solyc00g005170.1.1	0	0	0	0	0	0	0	0	0	0	0	0
Solyc00g005180.1.1	4	18	7	3	8	5	3	25	2	8	0	5
Solyc00g005280.1.1	0	0	0	0	0	0	0	0	0	0	0	0
Solyc00g005420.1.1	0	0	0	0	0	0	0	0	0	0	0	0
Solyc00g005430.1.1	0	0	0	0	0	0	0	0	0	0	0	0
Solyc00g005440.1.1	0	0	0	0	0	0	1	0	0	1	0	0
Solyc00g005450.1.1	0	0	0	0	0	0	0	0	0	0	0	0
Solyc00g005460.1.1	0	0	0	0	0	0	0	0	0	0	0	0
Solyc00g005470.1.1	0	0	0	0	0	0	0	0	0	0	0	0
Solyc00g005480.1.1	0	0	0	0	0	0	0	0	0	0	0	0
Solyc00g005490.1.1	0	0	0	0	0	0	0	0	0	0	0	0
Solyc00g005840.2.1	229	632	122	500	149	265	280	527	159	523	178	410
Solyc00g005850.1.1	0	0	0	0	0	0	0	0	0	0	0	0
Solyc00g005860.1.1	0	0	0	0	0	0	0	0	0	0	0	0
Solyc00g005870.1.1	0	0	0	0	0	0	0	0	0	0	0	0
Solyc00g005880.1.1	0	0	0	0	0	0	0	0	0	0	0	0
Solyc00g005890.2.1	0	9	1	2	1	1	2	3	7	22	4	7
Solyc00g005900.1.1	0	0	0	0	0	0	0	0	0	0	0	0
Solyc00g005980.1.1	0	0	0	0	0	0	0	0	0	0	0	0
Solyc00g006010.1.1	0	0	0	0	0	0	0	0	0	0	0	0
Solyc00g006020.1.1	0	0	0	0	0	0	0	0	0	0	0	0
Solyc00g006050.1.1	0	0	0	1	0	0	0	0	0	0	0	0
Solyc00g006090.1.1	0	0	0	0	0	0	0	0	0	0	0	0
Solyc00g006170.1.1	0	0	0	0	0	0	0	0	0	0	0	0
Solyc00g006250.1.1	0	0	0	0	0	0	0	0	0	0	0	0
Solyc00g006470.1.1	1857	5871	1163	6699	1323	4287	4569	3513	2694	8048	3157	3583
Solyc00g006480.1.1	0	0	0	0	0	0	0	0	0	0	0	0
Solyc00g006490.2.1	714	2362	473	2358	672	1202	1394	2560	622	2320	769	2114
Solyc00g006500.1.1	0	0	0	0	0	0	0	0	0	0	0	0
Solyc00g006510.1.1	0	0	0	0	0	0	0	0	0	0	0	0
Solyc00g006520.1.1	0	0	0	0	0	0	0	0	0	0	0	0
Solyc00g006530.1.1	0	0	0	0	0	0	0	0	0	0	0	0
Solyc00g006540.1.1	0	0	0	0	0	0	0	0	0	0	0	0
Solyc00g006550.1.1	0	0	0	0	0	0	0	0	0	0	0	0
Solyc00g006560.1.1	0	0	0	0	0	0	0	0	0	0	0	0
Solyc00g006570.1.1	0	0	0	0	0	0	0	0	0	0	0	0
Solyc00g006590.1.1	0	0	0	0	0	0	0	0	0	0	0	0
Solyc00g006600.1.1	0	0	0	0	0	0	0	0	0	0	0	0
Solyc00g006630.1.1	0	0	0	0	0	0	0	0	0	0	0	0
Solyc00g006650.1.1	0	0	0	0	0	0	0	0	0	0	0	0
Solyc00g006660.1.1	0	0	0	0	0	0	0	0	0	0	0	0
Solyc00g006670.2.1	0	0	0	0	0	0	0	0	0	1	0	0
Solyc00g006680.1.1	11	45	9	45	9	24	37	26	11	54	14	23
Solyc00g006690.2.1	1235	3782	482	3311	493	1734	2097	2136	904	7319	1456	2004
Solyc00g006700.1.1	0	0	0	0	0	0	0	0	0	0	0	0
Solyc00g006800.2.1	1354	3532	701	3040	1135	1836	2045	3952	1257	4777	1464	4579
Solyc00g006810.2.1	155	440	93	336	83	183	201	373	129	422	130	341
Solyc00g006820.2.1	704	2003	346	1397	510	823	852	1587	516	1966	495	1331
Solyc00g006830.2.1	878	2574	426	2365	713	1306	1311	2671	664	2579	890	2676
Solyc00g006840.2.1	0	0	0	0	0	0	0	1	0	0	0	0
Solyc00g006850.1.1	0	0	0	0	0	0	0	0	0	0	0	0
Solyc00g006860.1.1	0	0	0	0	0	0	0	0	0	0	0	0
Solyc00g006870.1.1	0	0	0	0	0	0	0	0	0	0	0	0
Solyc00g006880.1.1	0	0	0	0	0	0	0	0	0	0	0	0
Solyc00g006890.1.1	0	0	0	0	0	0	0	0	0	0	0	0
Solyc00g006900.1.1	0	0	0	0	0	0	0	0	0	0	0	0
Solyc00g007000.1.1	0	7	1	1	1	3	3	3	1	5	1	7
Solyc00g007010.2.1	237	632	91	516	157	272	326	557	176	680	251	700
Solyc00g007020.1.1	0	0	0	0	0	0	0	0	0	0	0	0
Solyc00g007030.1.1	0	0	0	0	0	0	0	0	0	0	0	0
Solyc00g007040.1.1	0	0	0	0	0	0	0	0	0	0	0	0
Solyc00g007050.1.1	0	0	0	0	0	0	0	0	0	0	0	0
Solyc00g007060.2.1	180	574	118	440	165	247	296	623	183	498	191	572
Solyc00g007070.2.1	1543	4759	1058	4489	1369	2429	2854	5459	1299	4844	1700	4570
Solyc00g007080.2.1	76	175	40	138	51	100	127	247	53	176	77	224
Solyc00g007090.2.1	126	409	102	320	130	191	191	420	140	495	149	403
Solyc00g007100.2.1	138	408	88	346	117	176	246	427	108	443	169	407
Solyc00g007110.2.1	93	236	45	302	98	125	142	314	60	297	85	347
Solyc00g007120.2.1	244	585	138	554	261	316	433	869	204	603	244	699
Solyc00g007130.2.1	12	20	6	32	3	7	8	28	10	16	10	18
Solyc00g007140.1.1	46	58	20	40	40	36	40	84	27	99	39	96
Solyc00g007150.2.1	67	190	48	161	65	112	139	305	54	195	63	169
Solyc00g007160.1.1	6	10	1	8	6	10	11	24	6	30	4	31
Solyc00g007170.1.1	5	12	4	13	4	12	13	51	9	34	12	30
Solyc00g007180.1.1	0	0	0	0	0	0	0	0	0	0	0	0
Solyc00g007190.2.1	21	48	5	60	16	27	37	67	14	79	22	46
Solyc00g007200.2.1	235	764	179	647	204	319	303	669	144	571	219	597
Solyc00g007210.1.1	0	0	0	0	0	0	0	0	0	0	0	0
Solyc00g007220.2.1	37	111	34	95	48	58	97	124	53	166	49	119
Solyc00g007230.1.1	0	0	0	0	0	0	0	0	0	0	0	0
Solyc00g007240.1.1	0	0	0	0	0	0	0	0	0	0	0	0
Solyc00g007250.1.1	0	0	0	0	0	0	0	0	0	0	0	0
Solyc00g007260.2.1	696	2050	467	1944	596	963	1069	2440	540	2232	649	1695
Solyc00g007270.2.1	1102	3166	668	3027	1019	1504	1980	3685	1250	5211	1544	4633
Solyc00g007290.1.1	0	0	0	0	0	0	0	0	0	0	0	0
Solyc00g007300.2.1	72	246	42	209	50	109	145	260	51	205	76	195
Solyc00g007310.1.1	0	0	0	0	0	0	0	0	0	0	0	0
Solyc00g007320.1.1	0	0	0	0	0	0	0	0	0	0	0	0
Solyc00g007330.1.1	0	0	0	0	0	0	0	0	0	0	0	0
Solyc00g007340.1.1	0	0	0	0	0	0	0	0	0	0	0	0
Solyc00g007350.1.1	0	0	0	0	0	0	0	0	0	0	0	0
Solyc00g007450.1.1	0	0	0	0	0	0	0	0	0	0	0	0
Solyc00g007550.1.1	2	1	1	1	0	0	2	3	0	0	0	0
Solyc00g007560.1.1	0	0	0	0	0	0	0	0	0	0	0	0
Solyc00g007570.1.1	0	0	0	0	0	0	0	0	0	0	0	0
Solyc00g007580.1.1	0	0	0	0	0	0	0	0	0	0	0	0
Solyc00g007590.1.1	0	0	0	0	0	0	0	0	0	0	0	0
Solyc00g007600.1.1	4	8	0	3	0	2	5	5	5	4	2	5
Solyc00g007610.1.1	0	0	0	0	0	0	0	0	0	0	0	0
Solyc00g007910.1.1	0	0	0	0	0	0	0	0	0	0	0	0
Solyc00g007920.1.1	0	0	0	0	0	0	0	0	0	0	0	0
Solyc00g007930.1.1	0	0	0	0	0	0	0	0	0	0	0	0
Solyc00g007940.1.1	0	0	0	0	0	0	0	0	0	0	0	0
Solyc00g007950.1.1	0	0	0	0	0	0	0	0	0	0	0	0
Solyc00g007960.1.1	0	0	0	0	0	0	0	0	0	0	0	0
Solyc00g007970.1.1	0	0	0	0	0	0	0	0	0	0	0	0
Solyc00g007980.1.1	0	0	0	0	0	0	0	0	0	0	0	0
Solyc00g007990.1.1	0	0	0	0	0	0	0	0	0	0	0	0
Solyc00g008000.1.1	0	0	0	0	0	0	0	0	0	0	0	0
Solyc00g008010.1.1	0	0	0	0	0	0	0	0	0	0	0	0
Solyc00g008020.1.1	0	0	0	0	0	0	0	0	0	0	0	0
Solyc00g008030.1.1	0	0	0	0	0	0	0	0	0	0	0	0
Solyc00g008040.1.1	0	0	0	0	0	0	0	0	0	0	0	0
Solyc00g008050.1.1	0	0	0	0	0	0	0	0	0	0	0	0
Solyc00g008060.1.1	0	0	0	0	0	0	0	0	0	0	0	0
Solyc00g008070.1.1	0	0	0	0	0	0	0	0	0	0	0	0
Solyc00g008080.1.1	0	0	0	0	0	0	0	0	0	0	0	0
Solyc00g008090.1.1	0	0	0	0	0	0	0	0	0	0	0	0
Solyc00g008100.1.1	0	0	0	0	0	0	0	0	0	0	0	0
Solyc00g008110.1.1	0	0	0	0	0	0	0	0	0	0	0	0
Solyc00g008120.1.1	0	0	0	0	0	0	0	0	0	0	0	0
Solyc00g008130.1.1	0	0	0	0	0	0	0	0	0	0	0	0
Solyc00g008140.1.1	0	0	0	0	0	0	0	0	0	0	0	0
Solyc00g008150.1.1	0	0	0	0	0	0	0	0	0	0	0	0
Solyc00g008160.1.1	0	0	0	0	0	0	0	0	0	0	0	0
Solyc00g008260.1.1	0	0	0	0	0	0	0	0	0	0	0	0
Solyc00g008270.1.1	0	0	0	0	0	0	0	0	0	0	0	0
Solyc00g008570.2.1	39	16	10	9	8	9	7	14	2	84	15	7
Solyc00g008580.1.1	8	31	11	53	7	37	32	28	32	60	33	36
Solyc00g008680.2.1	1103	3481	516	2569	808	1542	1929	3440	1027	3821	1174	2951
Solyc00g008690.1.1	0	0	0	0	0	0	0	0	0	0	0	0
Solyc00g008800.1.1	0	0	0	0	0	0	0	0	0	0	0	0
Solyc00g008900.1.1	0	0	0	0	0	0	0	0	0	0	0	0
Solyc00g008910.1.1	0	0	0	0	0	0	0	0	0	0	0	0
Solyc00g008920.1.1	0	0	0	0	0	0	0	0	0	0	0	0
Solyc00g009020.2.1	1710	4568	821	3313	1282	2230	2696	5215	1293	4962	1794	5012
Solyc00g009030.1.1	23	38	22	50	19	22	19	58	8	43	10	30
Solyc00g009040.2.1	28	55	20	63	48	51	85	179	97	404	121	365
Solyc00g009050.1.1	122	401	99	378	142	227	251	439	161	486	158	368
Solyc00g009060.2.1	198	512	123	468	149	269	351	641	156	541	188	570
Solyc00g009070.1.1	0	1	0	0	4	0	0	1	0	2	1	1
Solyc00g009080.2.1	99	277	50	182	76	122	132	317	53	219	99	201
Solyc00g009090.2.1	507	1436	343	1417	431	720	937	1902	339	1399	582	1708
Solyc00g009100.2.1	117	351	100	300	86	160	194	376	100	356	126	320
Solyc00g009110.2.1	109	334	108	376	99	160	176	381	78	235	63	158
Solyc00g009120.2.1	49	147	56	125	18	54	44	124	31	90	29	38
Solyc00g009130.2.1	44	111	19	114	14	47	47	120	30	126	28	85
Solyc00g009140.2.1	109	245	48	220	74	80	155	347	65	270	82	230
Solyc00g009240.1.1	0	0	0	0	0	0	0	0	0	0	0	0
Solyc00g009440.1.1	0	0	0	0	0	0	0	0	0	0	0	0
Solyc00g009540.1.1	0	0	0	0	0	0	0	0	0	0	0	0
Solyc00g009650.1.1	0	0	0	0	0	0	0	0	0	0	0	0
Solyc00g009660.1.1	0	0	0	0	0	0	0	0	0	0	0	0
Solyc00g009760.2.1	992	2676	752	3424	838	2266	2414	1825	1443	4195	1688	1830
Solyc00g009770.1.1	0	0	0	0	0	0	0	0	0	0	0	0
Solyc00g009780.1.1	2	2	0	6	0	0	1	1	3	5	1	1
Solyc00g009790.1.1	0	0	0	0	0	0	0	0	0	0	0	0
Solyc00g009800.1.1	4	22	3	26	6	10	16	5	1	43	11	14
Solyc00g010100.1.1	0	0	0	0	0	0	0	0	0	0	0	0
Solyc00g010110.1.1	0	0	0	0	0	0	0	0	0	0	0	0
Solyc00g010210.1.1	0	0	0	0	0	0	0	0	0	0	0	0
Solyc00g010410.1.1	0	0	0	0	0	0	0	0	0	0	0	0
Solyc00g010420.1.1	0	0	0	0	0	0	0	0	0	0	0	0
Solyc00g010520.1.1	0	0	0	0	0	0	0	0	0	0	0	0
Solyc00g010530.1.1	1	3	0	2	0	2	2	0	1	2	4	2
Solyc00g010540.1.1	0	0	0	0	0	0	0	0	0	0	0	0
Solyc00g010550.1.1	3	7	0	18	1	5	4	3	1	24	1	10
Solyc00g010750.1.1	0	0	0	0	0	0	0	0	0	0	0	0
Solyc00g010760.1.1	0	0	0	0	0	0	0	0	0	0	0	0
Solyc00g010770.1.1	0	0	0	0	0	0	0	0	0	0	0	0
Solyc00g010780.1.1	0	0	0	0	0	0	0	0	0	0	0	0
Solyc00g010790.1.1	0	0	0	0	0	0	0	0	0	0	0	0
Solyc00g010810.1.1	0	0	0	0	0	0	0	0	0	0	0	0
Solyc00g010930.1.1	0	0	0	0	0	0	0	0	0	0	0	0
Solyc00g011130.1.1	0	0	0	0	0	0	0	0	0	0	0	0
Solyc00g011140.1.1	0	0	0	0	0	0	0	0	0	0	0	0
Solyc00g011150.1.1	519	1244	363	1574	356	1244	922	660	706	1780	808	798
Solyc00g011160.1.1	7	5	1	3	4	4	5	8	4	19	6	1
Solyc00g011170.1.1	3	4	1	1	1	3	3	2	0	3	0	9
Solyc00g011180.1.1	0	0	0	0	0	0	0	0	0	0	0	0
Solyc00g011310.1.1	0	0	0	0	0	0	0	0	0	0	0	0
Solyc00g011550.1.1	0	0	0	0	0	0	0	0	0	0	0	0
Solyc00g011560.1.1	0	0	0	0	0	0	0	0	0	0	0	0
Solyc00g011660.1.1	0	0	0	0	0	0	0	0	0	0	0	0
Solyc00g011670.1.1	0	0	0	0	0	0	0	0	0	0	0	0
Solyc00g011870.1.1	0	0	0	0	0	0	0	0	0	0	0	0
Solyc00g011880.2.1	66	168	39	156	40	89	104	167	39	187	59	165
Solyc00g011890.2.1	698	2280	463	2461	670	1192	1683	2998	1053	3954	1299	3599
Solyc00g012090.1.1	0	0	0	0	0	0	0	0	0	0	0	0
Solyc00g012310.1.1	0	0	0	0	0	0	0	0	0	0	0	0
Solyc00g012430.1.1	0	2	0	4	0	3	2	1	2	3	0	3
Solyc00g012440.1.1	64	118	25	92	23	55	108	60	30	147	49	67
Solyc00g012540.1.1	0	0	0	0	0	0	0	0	0	0	0	0
Solyc00g012640.1.1	0	0	0	0	0	0	0	0	0	0	0	0
Solyc00g012650.1.1	0	0	0	0	0	0	0	0	0	0	0	0
Solyc00g012660.1.1	0	0	0	0	0	0	0	0	0	0	0	0
Solyc00g012670.1.1	0	0	0	0	0	0	0	0	0	0	0	0
Solyc00g012680.1.1	0	0	0	0	0	0	0	0	0	0	0	0
Solyc00g012690.1.1	0	0	0	0	0	0	0	0	0	0	0	0
Solyc00g012700.1.1	0	0	0	0	0	0	0	0	0	0	0	0
Solyc00g012800.1.1	0	0	0	0	0	0	0	0	0	0	0	0
Solyc00g012900.1.1	0	0	0	0	0	0	0	0	0	0	0	0
Solyc00g013000.1.1	0	0	0	0	0	0	0	0	0	0	0	0
Solyc00g013100.1.1	0	0	0	0	0	0	0	0	0	0	0	0
Solyc00g013110.1.1	0	0	0	0	0	1	1	3	0	1	0	2
Solyc00g013120.2.1	14	20	4	17	12	10	30	25	13	79	33	66
Solyc00g013130.2.1	0	0	0	0	0	0	0	0	0	0	1	0
Solyc00g013140.1.1	57	138	32	159	30	100	113	135	38	198	69	107
Solyc00g013150.1.1	15	17	5	16	4	8	13	14	0	32	16	20
Solyc00g013160.1.1	19	45	13	27	12	26	35	37	31	67	31	68
Solyc00g013170.1.1	25	61	12	56	35	53	46	78	44	87	80	89
Solyc00g013180.1.1	11	35	1	36	13	21	28	57	20	49	9	26
Solyc00g013190.1.1	3	20	2	15	3	10	10	15	4	15	3	11
Solyc00g013320.1.1	0	0	0	0	0	0	0	0	0	0	0	0
Solyc00g013330.1.1	0	0	0	0	0	0	0	0	0	0	0	0
Solyc00g013770.1.1	0	0	0	0	0	0	0	0	0	0	0	0
Solyc00g014170.1.1	0	0	0	0	0	0	0	0	0	0	0	0
Solyc00g014180.1.1	0	0	0	0	0	0	0	0	0	0	0	0
Solyc00g014190.1.1	0	0	0	0	0	0	0	0	0	0	0	0
Solyc00g014290.1.1	0	0	0	0	0	0	0	0	0	0	0	0
Solyc00g014390.1.1	0	0	0	0	0	0	0	0	0	0	0	0
Solyc00g014790.2.1	17	45	4	45	24	26	43	64	6	47	22	46
Solyc00g014800.1.1	0	6	5	7	3	0	6	9	2	9	7	5
Solyc00g014810.1.1	6	7	0	9	6	2	8	7	0	12	3	8
Solyc00g014820.2.1	9	13	7	9	3	12	9	11	0	10	5	12
Solyc00g014830.2.1	24	71	7	39	10	23	32	25	7	63	13	26
Solyc00g014840.1.1	12	24	4	26	8	11	11	21	5	31	12	17
Solyc00g014850.1.1	6	20	6	26	4	12	11	13	4	32	14	16
Solyc00g014860.1.1	0	1	0	0	0	0	2	1	0	0	0	0
Solyc00g014960.1.1	0	0	0	0	0	0	0	0	0	0	0	0
Solyc00g014970.1.1	0	0	0	0	0	0	0	0	0	0	0	0
Solyc00g014980.1.1	0	0	0	0	0	0	0	0	0	0	0	0
Solyc00g014990.1.1	0	0	0	0	0	0	0	0	0	0	0	0
Solyc00g015000.1.1	0	0	0	0	0	0	0	0	0	0	0	0
Solyc00g015600.1.1	2	2	2	1	2	6	1	3	0	4	5	0
Solyc00g015610.1.1	0	0	0	0	0	0	0	0	0	0	0	0
Solyc00g015720.1.1	0	0	0	0	0	0	0	0	0	0	0	0
Solyc00g015730.1.1	0	0	0	0	0	0	0	0	0	0	0	0
Solyc00g015740.1.1	0	0	0	0	0	0	0	0	0	0	0	0
Solyc00g015750.1.1	0	0	0	0	0	0	0	0	0	0	0	0
Solyc00g015760.1.1	0	0	0	0	0	0	0	0	0	0	0	0
Solyc00g015770.1.1	0	0	0	0	0	0	0	0	0	0	0	0
Solyc00g016470.1.1	0	0	0	0	0	0	0	0	0	0	0	0
Solyc00g016480.1.1	0	0	0	0	0	0	0	0	0	0	0	0
Solyc00g016490.1.1	0	0	0	0	0	0	0	0	0	0	0	0
Solyc00g016590.1.1	0	0	0	0	0	0	0	0	0	0	0	0
Solyc00g016790.1.1	0	0	0	0	0	0	0	0	0	0	0	0
Solyc00g016890.1.1	0	0	0	0	0	0	0	0	0	0	0	0
Solyc00g016900.1.1	0	0	0	0	0	0	0	0	0	0	0	0
Solyc00g016910.1.1	0	0	0	0	0	0	0	0	0	0	0	0
Solyc00g017210.1.1	0	0	0	0	0	0	0	0	0	0	0	0
Solyc00g017220.1.1	0	0	0	0	0	0	0	0	0	0	0	0
Solyc00g017230.1.1	0	0	0	0	0	0	0	0	0	0	0	0
Solyc00g017530.1.1	0	0	0	0	0	0	0	0	0	0	0	0
Solyc00g017540.1.1	0	0	0	0	0	0	0	0	0	0	0	0
Solyc00g017550.1.1	0	0	0	0	0	0	0	0	0	0	0	0
Solyc00g017750.1.1	0	0	0	0	0	0	0	0	0	0	0	0
Solyc00g017760.1.1	0	0	0	0	0	0	0	0	0	0	0	0
Solyc00g017860.1.1	0	0	0	0	0	0	0	0	0	0	0	0
Solyc00g017870.1.1	0	0	0	0	0	0	0	0	0	0	0	0
Solyc00g017880.1.1	0	0	0	0	0	0	0	0	0	0	0	0
Solyc00g017890.1.1	0	0	0	0	0	0	0	0	0	0	0	0
Solyc00g017900.1.1	0	0	0	0	0	0	0	0	0	0	0	0
Solyc00g017910.1.1	0	0	0	0	0	0	0	0	0	0	0	0
Solyc00g017920.1.1	0	0	0	0	0	0	0	0	0	0	0	0
Solyc00g017930.1.1	0	0	0	0	0	0	0	0	0	0	0	0
Solyc00g018760.1.1	0	0	0	0	0	0	0	0	0	0	0	0
Solyc00g018770.1.1	0	0	0	0	0	0	0	0	0	0	0	0
Solyc00g018970.1.1	0	0	0	1	0	0	2	1	0	2	1	0
Solyc00g019610.1.1	0	0	0	0	0	0	0	0	0	0	0	0
Solyc00g019620.1.1	0	0	0	0	0	0	0	0	0	0	0	0
Solyc00g019630.1.1	0	0	0	0	0	0	0	0	0	0	0	0
Solyc00g019730.1.1	49	198	31	149	45	61	96	147	31	155	56	106
Solyc00g019740.1.1	29	74	8	79	14	30	73	68	17	77	28	43
Solyc00g019750.1.1	11	35	8	28	14	13	16	29	8	42	14	17
Solyc00g019950.1.1	5	8	3	4	0	3	7	2	0	8	2	2
Solyc00g019960.1.1	3	10	0	1	1	2	3	9	1	11	3	5
Solyc00g019970.2.1	13	30	6	23	11	10	15	16	7	30	13	25
Solyc00g019980.2.1	5	11	1	6	1	2	11	11	9	27	9	18
Solyc00g019990.1.1	0	0	0	0	1	0	0	6	1	3	2	3
Solyc00g020000.1.1	15	13	11	7	10	7	13	22	4	47	14	30
Solyc00g020010.1.1	8	29	9	24	6	10	30	59	14	51	16	48
Solyc00g020020.2.1	4	9	0	2	2	3	4	7	4	19	7	4
Solyc00g020030.1.1	0	1	0	5	1	1	0	3	0	3	2	1
Solyc00g020040.1.1	6	11	4	6	0	4	5	1	1	10	0	4
Solyc00g020440.1.1	0	0	0	0	0	0	0	0	0	0	0	0
Solyc00g020540.1.1	0	0	0	0	0	1	0	3	0	7	1	4
Solyc00g020840.2.1	1	7	4	19	5	4	3	7	0	2	1	2
Solyc00g020940.1.1	0	0	0	0	0	0	0	0	0	0	0	0
Solyc00g020950.1.1	0	0	0	0	0	0	0	0	0	0	0	0
Solyc00g020960.1.1	0	0	0	0	0	0	0	0	0	0	0	0
Solyc00g020970.1.1	0	0	0	0	0	0	0	0	0	0	0	0
Solyc00g020980.1.1	0	0	0	0	0	0	0	0	0	0	0	0
Solyc00g020990.1.1	0	0	0	0	0	0	0	0	0	0	0	0
Solyc00g021490.1.1	0	0	0	0	0	0	0	0	0	0	0	0
Solyc00g021500.1.1	0	0	0	0	0	0	0	0	0	0	0	0
Solyc00g021510.1.1	0	0	0	0	0	0	0	0	0	0	0	0
Solyc00g021520.1.1	0	0	0	0	0	0	0	0	0	0	0	0
Solyc00g021530.1.1	0	0	0	0	0	0	0	0	0	0	0	0
Solyc00g021630.1.1	7	33	1	14	1	6	9	11	4	22	5	6
Solyc00g021640.2.1	12	30	10	20	9	6	25	32	8	37	11	25
Solyc00g021650.1.1	0	0	0	1	0	0	0	0	0	1	0	0
Solyc00g021660.1.1	0	0	0	0	0	0	0	0	0	0	0	0
Solyc00g022070.1.1	0	0	0	0	0	0	1	0	1	1	0	2
Solyc00g022080.1.1	0	3	0	2	0	0	1	0	0	2	0	1
Solyc00g022090.1.1	1	0	0	1	0	1	2	0	2	1	1	0
Solyc00g022100.1.1	14	21	4	9	1	6	10	9	4	25	11	6
Solyc00g022110.2.1	48	77	18	83	15	44	37	54	12	78	34	37
Solyc00g022920.1.1	0	0	0	0	0	0	0	0	0	0	0	0
Solyc00g023020.1.1	0	0	0	0	0	0	0	0	0	0	0	0
Solyc00g023030.1.1	0	0	0	0	0	0	0	0	0	0	0	0
Solyc00g023040.1.1	0	0	0	0	0	0	0	0	0	0	0	0
Solyc00g023050.1.1	0	0	0	0	0	0	0	0	0	0	0	0
Solyc00g023250.1.1	0	0	0	0	0	0	0	0	0	0	0	0
Solyc00g023260.1.1	0	0	0	0	0	0	0	0	0	0	0	0
Solyc00g023270.1.1	0	0	0	0	0	0	0	0	0	0	0	0
Solyc00g023470.1.1	0	0	0	0	0	0	0	0	0	0	0	0
Solyc00g023570.1.1	1	6	0	1	0	0	1	2	0	3	1	0
Solyc00g023580.1.1	0	0	0	4	1	2	0	2	0	0	0	1
Solyc00g023590.2.1	3	6	2	9	2	4	3	4	0	7	1	3
Solyc00g023600.1.1	2	9	1	4	0	2	10	11	5	2	2	2
Solyc00g023700.2.1	2	0	1	0	0	0	0	0	0	1	0	0
Solyc00g023710.1.1	0	0	0	0	0	0	1	0	0	2	0	0
Solyc00g024010.1.1	0	0	0	0	0	0	0	0	0	0	0	0
Solyc00g024020.1.1	0	0	0	0	0	0	0	0	0	0	0	0
Solyc00g024030.1.1	0	0	0	0	0	0	0	0	0	0	0	0
Solyc00g024040.1.1	0	0	0	0	0	0	0	0	0	0	0	0
Solyc00g024050.1.1	0	0	0	0	0	0	0	0	0	0	0	0
Solyc00g024150.2.1	653	1796	325	1407	354	641	664	1255	334	1101	336	815
Solyc00g024160.1.1	3	7	3	6	0	6	7	16	1	17	5	20
Solyc00g024170.1.1	0	0	0	0	0	0	0	0	0	1	0	0
Solyc00g024370.1.1	0	0	0	0	0	0	0	0	0	0	0	0
Solyc00g024570.1.1	0	0	0	0	0	0	0	0	0	0	0	0
Solyc00g024670.1.1	0	0	0	0	0	0	0	0	0	0	0	0
Solyc00g024680.1.1	0	0	0	0	0	0	0	0	0	0	0	0
Solyc00g024690.1.1	0	0	0	0	0	0	0	0	0	0	0	0
Solyc00g025290.1.1	26	33	13	21	35	27	28	26	6	81	31	43
Solyc00g025300.1.1	0	0	0	0	0	0	0	0	0	1	0	0
Solyc00g025400.2.1	1	1	0	0	1	0	1	3	1	0	0	0
Solyc00g025500.1.1	0	0	0	0	0	0	0	0	0	0	0	0
Solyc00g025510.1.1	0	0	0	0	0	0	0	0	0	0	0	0
Solyc00g025520.1.1	0	0	0	0	0	0	0	0	0	0	0	0
Solyc00g025530.1.1	0	0	0	0	0	0	0	0	0	0	0	0
Solyc00g025540.1.1	0	0	0	0	0	0	0	0	0	0	0	0
Solyc00g025650.1.1	0	0	0	0	0	0	0	0	0	0	0	0
Solyc00g025660.1.1	0	0	0	0	0	0	0	0	0	0	0	0
Solyc00g026160.2.1	0	2	3	5	0	0	2	10	18	121	5	13
Solyc00g026860.1.1	0	0	0	0	0	0	0	0	0	0	0	0
Solyc00g026870.1.1	0	0	0	0	0	0	0	0	0	0	0	0
Solyc00g026880.1.1	0	0	0	0	0	0	0	0	0	0	0	0
Solyc00g026890.1.1	0	0	0	0	0	0	0	0	0	0	0	0
Solyc00g026900.1.1	0	0	0	0	0	0	0	0	0	0	0	0
Solyc00g027120.1.1	0	0	0	0	0	0	0	0	0	0	0	0
Solyc00g027130.1.1	0	0	0	0	0	0	0	0	0	0	0	0
Solyc00g027140.1.1	0	0	0	0	0	0	0	0	0	0	0	0
Solyc00g027640.1.1	0	0	0	0	0	0	0	0	0	0	0	0
Solyc00g027650.1.1	0	0	0	0	0	0	0	0	0	0	0	0
Solyc00g027660.1.1	0	0	0	0	0	0	0	0	0	0	0	0
Solyc00g027670.1.1	0	0	0	0	0	0	0	0	0	0	0	0
Solyc00g027770.2.1	668	1877	514	2032	697	1101	1139	2317	546	1933	666	1810
Solyc00g027870.1.1	0	0	0	0	0	0	0	0	0	0	0	0
Solyc00g027970.1.1	0	0	0	0	0	0	0	0	0	0	0	0
Solyc00g027980.1.1	0	0	0	0	0	0	0	0	0	0	0	0
Solyc00g027990.1.1	0	0	0	0	0	0	0	0	0	0	0	0
Solyc00g028090.1.1	0	0	0	0	0	0	0	0	0	0	0	0
Solyc00g028100.1.1	0	0	0	0	0	0	0	0	0	0	0	0
Solyc00g028110.1.1	0	0	0	0	0	0	0	0	0	0	0	0
Solyc00g028120.1.1	0	0	0	0	0	0	0	0	0	0	0	0
Solyc00g028420.1.1	0	0	0	0	0	0	0	0	0	0	0	0
Solyc00g028520.1.1	0	0	0	0	0	0	0	0	0	0	0	0
Solyc00g028530.1.1	0	0	0	0	0	0	0	0	0	0	0	0
Solyc00g028540.1.1	0	0	0	0	0	0	0	0	0	0	0	0
Solyc00g028550.1.1	0	0	0	0	0	0	0	0	0	0	0	0
Solyc00g028560.1.1	0	0	0	0	0	0	0	0	0	0	0	0
Solyc00g028760.1.1	0	0	0	0	0	0	0	0	0	0	0	0
Solyc00g028960.1.1	0	0	0	0	0	0	0	0	0	0	0	0
Solyc00g029060.1.1	0	0	0	0	0	0	0	0	0	0	0	0
Solyc00g029070.1.1	0	0	0	0	0	0	0	0	0	0	0	0
Solyc00g029080.1.1	0	0	0	0	0	0	0	0	0	0	0	0
Solyc00g029090.1.1	0	0	0	0	0	0	0	0	0	0	0	0
Solyc00g029190.2.1	0	0	0	0	0	0	0	0	1	5	1	1
Solyc00g029290.1.1	0	0	0	0	0	0	0	0	0	0	0	0
Solyc00g029300.1.1	0	0	0	0	0	0	0	0	0	0	0	0
Solyc00g029500.1.1	0	0	0	0	0	0	0	0	0	0	0	0
Solyc00g029800.1.1	0	0	0	0	0	0	0	0	0	0	0	0
Solyc00g030000.1.1	0	0	0	0	0	0	0	0	0	0	0	0
Solyc00g030100.1.1	18	66	17	68	25	34	54	78	53	205	51	177
Solyc00g030110.1.1	0	0	0	0	0	0	0	0	0	0	0	0
Solyc00g030210.1.1	0	0	0	0	0	0	0	0	0	0	0	0
Solyc00g030510.2.1	0	0	0	0	0	0	0	0	0	0	0	0
Solyc00g030520.2.1	109	260	65	276	81	159	193	350	82	258	131	288
Solyc00g030820.1.1	0	3	0	0	0	2	5	4	0	4	0	1
Solyc00g031020.1.1	0	0	0	0	0	0	0	0	0	0	0	0
Solyc00g031030.1.1	0	0	0	0	0	0	0	0	0	0	0	0
Solyc00g031040.1.1	0	0	0	0	0	0	0	0	0	0	0	0
Solyc00g031050.1.1	0	0	0	0	0	0	0	0	0	0	0	0
Solyc00g031060.1.1	0	0	0	0	0	0	0	0	0	0	0	0
Solyc00g031360.1.1	0	0	0	0	0	0	0	0	0	0	0	0
Solyc00g031370.1.1	0	0	0	0	0	0	0	0	0	0	0	0
Solyc00g031380.1.1	0	0	0	0	0	0	0	0	0	0	0	0
Solyc00g031390.1.1	0	0	0	0	0	0	0	0	0	0	0	0
Solyc00g031490.1.1	0	0	0	0	0	0	0	0	0	0	0	0
Solyc00g031500.1.1	0	0	0	0	0	0	0	0	0	0	0	0
Solyc00g031700.1.1	0	0	0	0	0	0	0	0	0	0	0	0
Solyc00g031710.1.1	0	0	0	0	0	0	0	0	0	0	0	0
Solyc00g031720.1.1	0	0	0	0	0	0	0	0	0	0	0	0
Solyc00g031730.1.1	0	0	0	0	0	0	0	0	0	0	0	0
Solyc00g032030.1.1	0	0	0	0	0	0	0	0	0	0	0	0
Solyc00g032230.1.1	0	0	0	0	0	0	0	0	0	0	0	0
Solyc00g032940.1.1	0	0	0	0	0	0	0	0	0	0	0	0
Solyc00g033460.2.1	0	0	1	1	0	0	1	0	0	0	0	0
Solyc00g033860.1.1	0	0	0	0	0	0	0	0	0	0	0	0
Solyc00g033870.1.1	0	0	0	0	0	0	0	0	0	0	0	0
Solyc00g033880.1.1	0	0	0	0	0	0	0	0	0	0	0	0
Solyc00g033890.1.1	0	0	0	0	0	0	0	0	0	0	0	0
Solyc00g033990.1.1	0	0	0	0	0	0	0	0	0	0	0	0
Solyc00g034000.1.1	0	0	0	0	0	0	0	0	0	0	0	0
Solyc00g034010.1.1	0	0	0	0	0	0	0	0	0	0	0	0
Solyc00g034810.1.1	0	0	0	0	0	0	0	1	0	0	0	0
Solyc00g035010.1.1	0	0	0	0	0	0	0	0	0	0	0	0
Solyc00g035020.1.1	0	0	0	0	0	0	0	0	0	0	0	0
Solyc00g036320.1.1	0	0	0	0	0	0	0	0	0	0	0	0
Solyc00g036520.1.1	2	0	0	0	0	0	0	0	0	0	2	0
Solyc00g036530.1.1	0	0	0	0	0	0	0	4	0	0	0	0
Solyc00g036540.1.1	0	0	0	0	0	0	0	0	0	0	0	0
Solyc00g036740.1.1	0	0	0	0	0	0	0	0	0	0	0	0
Solyc00g036750.1.1	0	0	0	0	0	0	0	0	0	0	0	0
Solyc00g036760.1.1	0	0	0	0	0	0	0	0	0	0	0	0
Solyc00g036960.1.1	0	0	0	0	0	0	0	0	0	0	0	0
Solyc00g038390.1.1	0	0	0	0	0	0	0	0	0	0	0	0
Solyc00g039290.1.1	0	0	0	0	0	0	0	0	0	0	0	0
Solyc00g039990.2.1	35	69	24	61	21	44	38	116	27	105	38	75
Solyc00g040290.1.1	0	0	0	0	0	0	0	0	0	0	0	0
Solyc00g040390.1.1	0	0	0	0	0	0	0	0	0	0	0	0
Solyc00g040490.1.1	0	0	0	0	0	0	0	0	0	0	0	0
Solyc00g041090.1.1	1	0	2	0	0	0	2	0	0	3	1	1
Solyc00g041190.1.1	0	0	0	0	0	0	0	0	0	0	0	0
Solyc00g041200.1.1	0	0	0	0	0	0	0	0	0	0	0	0
Solyc00g041210.1.1	0	0	0	0	0	0	0	0	0	0	0	0
Solyc00g041220.1.1	0	0	0	0	0	0	0	0	0	0	0	0
Solyc00g042120.1.1	0	0	0	0	0	0	0	0	0	0	0	0
Solyc00g042130.1.1	0	0	0	0	0	0	0	0	0	0	0	0
Solyc00g042140.1.1	0	0	0	1	0	0	0	0	0	0	0	0
Solyc00g042640.1.1	3	1	3	10	0	0	1	3	0	0	1	1
Solyc00g042840.1.1	27	54	12	47	34	36	39	52	16	51	15	60
Solyc00g042850.1.1	1	0	0	0	0	0	0	0	0	0	0	0
Solyc00g044350.2.1	406	807	264	821	350	400	308	651	58	184	93	218
Solyc00g044550.1.1	0	0	0	0	0	0	0	0	0	0	0	0
Solyc00g044750.1.1	0	0	0	0	0	0	0	0	0	0	0	0
Solyc00g045570.1.1	0	0	0	0	0	0	0	0	0	1	0	0
Solyc00g046570.1.1	0	0	0	0	0	0	0	0	0	0	0	0
Solyc00g046580.1.1	0	0	0	0	0	0	0	0	0	0	0	0
Solyc00g046980.1.1	0	0	0	0	0	0	0	0	0	0	0	0
Solyc00g047180.1.1	0	0	0	0	0	0	0	0	0	0	0	0
Solyc00g047190.1.1	0	0	0	0	0	0	0	0	0	1	0	0
Solyc00g047200.1.1	0	0	0	2	0	0	1	3	1	0	1	0
Solyc00g047700.2.1	2609	5402	1518	5167	2638	3285	3739	6820	1885	6879	2651	6220
Solyc00g047810.1.1	0	2	0	0	0	0	0	3	0	0	2	0
Solyc00g048410.1.1	0	0	0	0	0	0	0	0	0	0	0	0
Solyc00g048510.2.1	0	0	0	0	0	0	0	0	1	0	0	0
Solyc00g049210.1.1	7	17	3	4	5	4	12	2	3	12	5	5
Solyc00g049220.1.1	1	2	0	2	0	0	2	0	0	2	0	0
Solyc00g049520.2.1	0	0	0	1	0	0	0	0	0	1	0	2
Solyc00g049620.1.1	0	0	0	0	0	0	0	0	0	0	0	0
Solyc00g049920.1.1	0	0	0	0	0	0	0	0	0	0	0	0
Solyc00g050020.1.1	0	0	0	0	0	0	0	0	0	0	0	0
Solyc00g050030.1.1	0	0	0	0	0	0	0	0	0	0	0	0
Solyc00g050130.1.1	58	146	33	119	44	46	67	132	50	200	46	147
Solyc00g050430.2.1	194	482	96	323	120	235	504	1501	765	3486	754	2132
Solyc00g052430.2.1	2	7	4	7	2	1	4	2	4	11	2	1
Solyc00g052530.2.1	0	0	0	0	0	0	0	0	0	0	0	0
Solyc00g052540.1.1	0	0	0	0	0	0	0	0	0	0	0	0
Solyc00g052940.2.1	0	0	0	1	2	0	0	0	0	0	0	0
Solyc00g053440.2.1	105	234	67	245	63	137	136	265	100	258	104	236
Solyc00g053740.1.1	0	0	0	0	0	0	0	0	0	0	0	0
Solyc00g055940.1.1	0	0	0	0	0	0	0	0	0	0	0	0
Solyc00g055950.1.1	0	0	0	0	0	0	0	0	0	0	0	0
Solyc00g055960.1.1	0	0	0	0	0	0	0	0	0	0	0	0
Solyc00g055970.1.1	0	0	0	0	0	0	0	0	0	0	0	0
Solyc00g055980.1.1	0	0	0	1	0	0	0	0	0	0	0	0
Solyc00g056180.1.1	0	0	0	0	0	0	0	0	0	0	0	0
Solyc00g056680.1.1	8	26	9	15	11	8	23	36	12	45	8	26
Solyc00g057280.1.1	0	0	0	0	0	0	0	0	0	0	0	0
Solyc00g057880.2.1	1	3	1	4	0	1	0	0	1	1	2	0
Solyc00g058280.1.1	0	0	0	0	0	0	0	0	0	0	0	0
Solyc00g058480.1.1	0	0	0	0	0	0	0	0	0	0	0	0
Solyc00g058490.1.1	0	0	0	0	0	0	0	0	0	0	0	0
Solyc00g058890.1.1	0	0	0	0	0	0	0	0	0	0	0	0
Solyc00g058900.1.1	0	0	0	0	0	0	0	0	0	0	0	0
Solyc00g059100.2.1	127	311	63	311	108	207	163	372	63	215	113	290
Solyc00g059500.1.1	30	80	11	89	16	29	20	80	11	83	20	57
Solyc00g060700.1.1	0	0	0	0	0	0	0	0	0	0	0	0
Solyc00g060710.1.1	0	0	0	0	0	0	0	0	0	0	0	0
Solyc00g060810.2.1	0	0	0	0	0	0	0	0	0	0	0	0
Solyc00g062710.1.1	0	0	0	0	0	0	0	0	0	0	0	0
Solyc00g063110.2.1	0	0	0	0	0	0	0	0	0	0	0	0
Solyc00g063510.1.1	0	0	0	0	0	0	0	0	0	0	0	0
Solyc00g065510.1.1	0	0	0	0	0	0	0	0	0	0	0	0
Solyc00g065610.1.1	0	0	0	0	0	0	0	0	0	0	0	0
Solyc00g065620.1.1	0	0	0	0	0	0	0	0	0	0	0	0
Solyc00g065630.1.1	0	0	0	0	0	0	0	0	0	0	0	0
Solyc00g065930.1.1	0	0	0	0	0	0	0	0	0	0	0	0
Solyc00g065940.1.1	0	0	0	0	0	0	0	0	0	0	0	0
Solyc00g066140.1.1	0	0	0	0	0	0	0	0	0	0	0	0
Solyc00g066150.1.1	0	0	0	0	0	0	0	0	0	0	0	0
Solyc00g066350.1.1	0	0	0	0	0	0	0	0	0	0	0	0
Solyc00g066360.1.1	0	0	0	0	0	0	0	0	0	0	0	0
Solyc00g066370.1.1	0	0	0	0	0	0	0	0	0	0	0	0
Solyc00g067470.1.1	18	53	39	77	35	35	52	43	28	60	39	87
Solyc00g068970.2.1	238	854	191	1013	165	646	739	458	385	1169	427	512
Solyc00g068980.1.1	557	3236	542	3972	701	2678	2447	2031	2210	4227	2248	2005
Solyc00g069680.1.1	0	0	0	0	0	0	0	0	0	0	0	0
Solyc00g069880.2.1	0	2	0	1	0	1	2	2	2	7	2	2
Solyc00g070680.1.1	0	0	0	0	0	0	0	0	0	0	0	0
Solyc00g071180.2.1	0	0	0	0	0	0	5	3	18	23	13	34
Solyc00g071580.1.1	0	0	0	0	0	0	0	0	0	0	0	0
Solyc00g071590.1.1	0	0	0	0	0	0	0	0	0	0	0	0
Solyc00g071600.1.1	0	0	0	0	0	0	0	0	0	0	0	0
Solyc00g072100.2.1	47	123	34	145	62	94	88	151	38	130	81	159
Solyc00g072400.2.1	0	0	0	0	0	0	0	0	0	0	0	0
Solyc00g072800.2.1	0	0	0	0	0	0	0	0	0	0	0	0
Solyc00g073200.1.1	0	0	0	0	0	0	0	0	0	0	0	0
Solyc00g073900.1.1	0	0	0	0	0	0	0	0	0	0	0	0
Solyc00g073910.1.1	0	0	0	0	0	0	0	0	0	0	0	0
Solyc00g074210.1.1	0	0	0	0	0	0	0	0	0	0	0	0
Solyc00g074810.1.1	0	0	0	0	0	0	0	0	0	0	0	0
Solyc00g074820.1.1	0	0	0	0	0	0	0	0	0	0	0	0
Solyc00g074830.1.1	0	0	0	0	0	0	0	0	0	0	0	0
Solyc00g075030.2.1	0	0	0	0	0	0	0	0	0	0	0	0
Solyc00g075040.1.1	0	0	0	0	0	0	0	0	0	0	0	0
Solyc00g075440.1.1	0	2	4	1	0	0	1	0	0	0	2	0
Solyc00g075450.2.1	0	0	0	1	1	0	0	0	1	1	0	0
Solyc00g076250.1.1	0	0	0	0	0	0	0	0	0	0	0	0
Solyc00g079050.1.1	0	0	0	0	0	0	0	0	0	0	0	0
Solyc00g080550.1.1	0	0	0	0	0	0	0	0	0	0	0	0
Solyc00g080750.2.1	0	0	0	0	0	0	0	0	0	1	0	2
Solyc00g082150.2.1	893	1787	404	1664	653	948	1035	2061	499	2051	715	1803
Solyc00g082550.1.1	0	0	1	0	0	0	0	0	0	0	2	0
Solyc00g084650.1.1	0	0	0	0	0	0	0	0	0	0	0	0
Solyc00g084750.2.1	0	0	0	0	0	0	0	0	0	0	0	0
Solyc00g084760.1.1	0	2	0	2	1	0	0	13	0	16	4	7
Solyc00g084770.1.1	0	3	0	2	0	0	2	1	6	9	4	3
Solyc00g084870.2.1	0	0	0	0	0	0	0	0	0	0	0	1
Solyc00g085070.2.1	703	1974	383	1744	614	960	1255	2409	688	2758	883	2388
Solyc00g085370.1.1	0	0	0	0	0	0	0	0	0	0	0	0
Solyc00g085770.1.1	0	0	0	0	0	0	0	0	0	0	0	0
Solyc00g085780.1.1	0	0	0	0	0	0	0	0	0	0	0	0
Solyc00g088080.1.1	0	0	0	0	0	0	0	0	0	0	0	0
Solyc00g088090.1.1	0	0	0	0	0	0	0	0	0	0	0	0
Solyc00g088190.1.1	0	0	0	1	0	0	0	0	0	0	0	0
Solyc00g088200.1.1	0	0	0	0	0	0	0	0	0	0	0	0
Solyc00g088210.1.1	0	0	0	0	0	0	0	0	0	0	0	0
Solyc00g090110.1.1	0	0	0	0	0	0	0	0	0	0	0	0
Solyc00g090120.1.1	0	0	0	0	0	0	0	0	0	0	0	0
Solyc00g090130.1.1	0	0	0	0	0	0	0	0	0	0	0	0
Solyc00g090430.2.1	0	0	0	0	0	0	0	0	0	0	0	0
Solyc00g090630.1.1	0	0	0	0	0	0	0	0	0	0	0	0
Solyc00g090640.1.1	0	0	0	0	0	0	0	0	0	0	0	0
Solyc00g090650.1.1	0	0	0	0	0	0	0	0	0	0	0	0
Solyc00g090660.1.1	0	0	0	0	0	0	0	0	0	0	0	0
Solyc00g090860.1.1	0	0	0	0	0	0	0	0	0	0	0	0
Solyc00g090870.2.1	162	448	112	449	178	231	254	464	121	510	173	407
Solyc00g091170.2.1	155	415	77	263	104	175	213	358	83	313	87	257
Solyc00g092870.1.1	0	0	0	0	0	0	0	0	0	0	0	0
Solyc00g092880.1.1	0	0	0	0	0	0	0	0	0	0	0	0
Solyc00g092890.1.1	0	0	0	0	0	0	0	0	0	0	0	0
Solyc00g092900.1.1	0	3	0	2	0	0	0	0	0	1	2	0
Solyc00g093000.1.1	10	19	7	18	3	8	8	22	8	23	7	11
Solyc00g093100.1.1	0	0	0	0	0	0	0	0	0	0	0	0
Solyc00g093300.1.1	0	0	0	0	0	0	0	0	0	0	0	0
Solyc00g093310.1.1	0	0	0	0	0	0	0	0	0	0	0	0
Solyc00g094010.1.1	0	0	0	0	0	0	0	0	0	0	0	0
Solyc00g094020.1.1	0	0	0	0	0	0	0	0	0	0	0	0
Solyc00g094520.1.1	6	13	7	20	5	11	9	8	3	16	9	15
Solyc00g094530.1.1	5	18	4	17	1	6	15	25	5	31	6	13
Solyc00g094540.1.1	12	22	4	19	6	15	22	31	5	46	7	21
Solyc00g094550.1.1	0	2	1	6	0	0	1	0	0	5	3	0
Solyc00g094850.1.1	0	0	0	0	0	0	0	0	0	0	0	0
Solyc00g095450.1.1	0	0	0	0	0	0	0	0	0	0	0	0
Solyc00g095460.1.1	0	0	0	0	0	0	0	0	0	0	0	0
Solyc00g095760.1.1	0	0	0	0	0	0	0	0	0	0	0	0
Solyc00g095860.1.1	0	0	0	0	0	0	0	0	0	0	0	0
Solyc00g096060.1.1	0	0	0	0	0	0	0	0	0	0	0	0
Solyc00g096460.1.1	76	205	31	157	43	73	87	230	32	220	54	181
Solyc00g097260.1.1	0	0	0	0	0	0	0	0	0	0	0	0
Solyc00g097760.1.1	0	0	0	0	0	0	0	0	0	0	0	0
Solyc00g097960.1.1	103	333	33	148	44	101	111	234	55	253	72	202
Solyc00g098560.2.1	42	102	30	100	16	39	54	113	51	132	50	118
Solyc00g099160.1.1	0	0	0	0	0	0	0	0	0	0	0	0
Solyc00g099460.1.1	0	0	0	0	0	0	0	0	0	0	0	0
Solyc00g099470.1.1	0	0	0	0	0	0	0	0	0	0	0	0
Solyc00g099570.1.1	0	0	0	0	0	0	0	0	0	0	0	0
Solyc00g099580.1.1	14	30	3	24	12	17	25	100	9	77	33	66
Solyc00g099880.1.1	0	0	0	0	0	0	0	0	0	0	0	0
Solyc00g100880.2.1	0	0	0	0	0	0	15	30	6	10	36	116
Solyc00g101700.1.1	0	0	0	0	0	0	0	0	0	0	0	0
Solyc00g102000.1.1	76	55	34	36	24	30	59	42	2	346	68	26
Solyc00g102400.2.1	0	0	0	0	0	0	0	0	0	0	0	0
Solyc00g104200.1.1	0	0	0	0	0	0	0	0	0	0	0	0
Solyc00g104210.1.1	0	0	0	0	0	0	0	0	0	0	0	0
Solyc00g104310.1.1	0	0	0	0	0	0	0	0	0	0	0	0
Solyc00g104320.1.1	0	0	0	0	0	0	0	0	0	0	0	0
Solyc00g104330.1.1	0	0	0	0	0	0	0	0	0	0	0	0
Solyc00g104630.1.1	0	0	0	0	0	0	0	0	0	0	0	0
Solyc00g104730.1.1	0	0	0	0	0	0	0	0	0	0	0	0
Solyc00g104740.1.1	0	0	0	0	0	0	0	0	0	0	0	0
Solyc00g104940.1.1	0	0	0	0	0	0	0	0	0	0	0	0
Solyc00g105340.1.1	0	0	0	0	0	0	0	0	0	0	0	0
Solyc00g105350.1.1	0	0	0	0	0	0	0	0	0	0	0	0
Solyc00g105750.1.1	0	0	0	0	0	0	0	0	0	0	0	0
Solyc00g106650.1.1	10	27	1	24	3	6	20	29	8	41	16	29
Solyc00g107050.1.1	0	0	0	0	0	0	0	0	0	0	0	0
Solyc00g107550.1.1	0	0	0	0	0	0	0	0	0	0	0	0
Solyc00g108550.1.1	2	0	0	0	0	0	0	0	0	1	0	1
Solyc00g109450.1.1	0	0	0	0	0	0	0	0	0	0	0	0
Solyc00g109850.1.1	0	0	0	0	0	0	0	0	0	0	0	0
Solyc00g109860.1.1	0	0	0	0	0	0	0	0	0	0	0	0
Solyc00g110060.1.1	0	0	0	0	0	0	0	0	0	0	0	0
Solyc00g110070.1.1	0	0	0	0	0	0	0	0	0	0	0	0
Solyc00g110370.1.1	0	0	0	0	0	0	0	0	0	0	0	0
Solyc00g110870.2.1	303	889	116	606	183	327	513	993	194	715	208	586
Solyc00g111170.1.1	0	0	0	0	0	0	0	0	0	0	0	0
Solyc00g111270.1.1	0	0	0	0	0	0	0	0	0	0	0	0
Solyc00g111370.1.1	0	0	0	0	0	0	0	0	0	0	0	0
Solyc00g111770.1.1	0	0	0	0	0	0	0	0	0	0	0	0
Solyc00g111780.1.1	0	0	0	0	0	0	0	0	0	0	0	0
Solyc00g112180.1.1	0	0	0	0	0	0	0	0	0	0	0	0
Solyc00g112190.2.1	1	0	0	1	0	0	0	2	0	1	0	0
Solyc00g112490.1.1	0	0	0	0	0	0	0	0	0	0	0	0
Solyc00g112500.1.1	0	0	0	0	0	0	0	0	0	0	0	0
Solyc00g112600.1.1	0	0	0	0	0	0	0	0	0	0	0	0
Solyc00g112700.1.1	0	0	0	0	0	0	0	0	0	0	0	0
Solyc00g112710.1.1	0	0	0	0	0	0	0	0	0	0	0	0
Solyc00g112810.1.1	0	0	0	0	0	0	0	0	0	0	0	0
Solyc00g112820.1.1	0	0	0	0	0	0	0	0	0	0	0	0
Solyc00g112830.1.1	0	0	0	0	0	0	0	0	0	0	0	0
Solyc00g112930.2.1	1	0	0	0	0	0	0	0	1	0	0	0
Solyc00g113230.1.1	0	0	0	0	0	0	0	0	0	0	0	0
Solyc00g113330.1.1	0	0	0	0	0	0	0	0	0	0	0	0
Solyc00g113730.1.1	0	0	0	0	0	0	0	0	0	0	0	0
Solyc00g113740.1.1	0	0	0	0	0	0	0	0	0	0	0	0
Solyc00g113750.1.1	0	0	0	0	0	0	0	0	0	0	0	0
Solyc00g114550.1.1	0	0	0	0	0	0	0	0	0	0	0	0
Solyc00g116150.1.1	0	0	0	0	0	0	0	0	0	0	0	0
Solyc00g117450.2.1	29	66	10	63	21	59	57	134	14	38	24	45
Solyc00g117650.1.1	0	0	0	0	0	0	0	0	0	0	0	0
Solyc00g118680.2.1	15	22	7	17	19	16	25	45	5	32	11	24
Solyc00g118690.1.1	21	76	26	100	37	60	83	119	48	180	35	128
Solyc00g120120.1.1	0	0	0	0	0	0	0	0	0	0	0	0
Solyc00g120820.1.1	0	0	0	0	0	0	0	0	0	0	0	0
Solyc00g120830.1.1	0	0	0	0	0	0	0	0	0	0	0	0
Solyc00g120930.1.1	0	0	0	0	0	0	0	0	0	0	0	0
Solyc00g121230.1.1	0	0	0	0	0	0	0	0	0	0	0	0
Solyc00g121730.1.1	0	0	0	0	0	0	0	0	0	0	0	0
Solyc00g122530.1.1	0	0	0	0	0	0	0	0	0	0	0	0
Solyc00g123030.1.1	0	0	0	0	0	0	0	0	0	0	0	0
Solyc00g123040.1.1	0	0	0	0	0	0	0	0	0	0	0	0
Solyc00g123240.1.1	0	0	0	0	0	0	0	0	0	0	0	0
Solyc00g124840.1.1	0	0	0	0	0	0	0	0	0	0	0	0
Solyc00g124850.1.1	0	0	0	0	0	0	0	0	0	0	0	0
Solyc00g124860.1.1	0	0	0	0	0	0	0	0	0	0	0	0
Solyc00g125260.1.1	0	0	0	0	0	0	0	0	0	0	0	0
Solyc00g125270.1.1	0	0	0	0	0	0	0	0	0	0	0	0
Solyc00g125580.1.1	0	0	0	0	0	0	0	0	0	0	0	0
Solyc00g125980.1.1	23	17	12	16	19	12	19	29	3	40	16	18
Solyc00g125990.1.1	8	23	0	7	2	8	11	8	1	19	4	6
Solyc00g126000.1.1	9	12	1	3	4	0	2	9	3	22	12	14
Solyc00g126010.1.1	7	16	2	5	8	2	6	9	1	35	5	20
Solyc00g126420.1.1	0	0	0	0	0	0	0	0	0	0	0	0
Solyc00g126430.1.1	0	0	0	0	0	0	0	0	0	0	0	0
Solyc00g126440.1.1	0	0	0	0	0	0	0	0	0	0	0	0
Solyc00g127540.1.1	0	0	0	0	0	0	0	0	0	0	0	0
Solyc00g127550.1.1	0	0	0	0	0	0	0	0	0	0	0	0
Solyc00g127560.1.1	0	0	0	0	0	0	0	0	0	0	2	0
Solyc00g127660.2.1	366	1064	236	964	289	528	623	1160	275	1169	451	1053
Solyc00g127670.1.1	75	185	54	197	73	113	184	257	105	302	128	242
Solyc00g127870.2.1	252	723	162	520	198	375	467	733	211	645	277	692
Solyc00g128870.2.1	892	2487	594	2175	887	1200	1361	2262	709	2297	862	2105
Solyc00g129670.1.1	0	0	0	0	0	0	0	0	0	0	0	0
Solyc00g129680.1.1	0	0	0	0	0	0	0	0	0	0	0	0
Solyc00g129880.1.1	0	0	0	0	0	0	0	0	0	0	0	0
Solyc00g129980.1.1	0	0	0	0	0	0	0	0	0	0	0	0
Solyc00g130180.1.1	0	0	0	0	0	0	0	0	0	0	0	0
Solyc00g130190.1.1	0	0	0	0	0	0	0	0	0	0	0	0
Solyc00g130290.1.1	0	0	0	0	0	0	0	0	0	0	0	0
Solyc00g130690.1.1	0	0	0	0	0	0	0	0	0	0	0	0
Solyc00g130700.1.1	0	0	0	0	0	0	0	0	0	0	0	0
Solyc00g130800.1.1	0	0	0	0	0	0	0	0	0	0	0	0
Solyc00g130810.1.1	0	0	0	0	0	0	0	0	0	0	0	0
Solyc00g131610.1.1	0	0	0	0	0	0	0	0	0	0	0	0
Solyc00g131710.1.1	0	0	0	0	0	0	0	0	0	0	0	0
Solyc00g133110.1.1	0	0	0	0	0	0	0	0	0	0	0	0
Solyc00g133710.1.1	0	0	0	0	0	0	0	0	0	0	0	0
Solyc00g133720.1.1	0	0	0	0	0	0	0	0	0	0	0	0
Solyc00g134620.1.1	0	0	0	0	0	0	0	0	0	0	0	0
Solyc00g134820.1.1	0	0	0	0	0	0	0	0	0	0	0	0
Solyc00g134830.1.1	0	0	0	0	0	0	0	0	0	0	0	0
Solyc00g134840.1.1	0	0	0	0	0	0	0	0	0	0	0	0
Solyc00g135040.1.1	0	0	0	0	0	0	0	0	0	0	0	0
Solyc00g135050.1.1	0	0	0	0	0	0	0	0	0	0	0	0
Solyc00g135060.1.1	0	0	0	0	0	0	0	0	0	0	0	0
Solyc00g135260.1.1	0	0	0	0	0	0	0	0	0	0	0	0
Solyc00g136260.1.1	1	3	0	11	1	1	1	0	0	1	0	1
Solyc00g136560.2.1	1	4	0	3	4	6	5	8	1	10	0	6
Solyc00g138060.2.1	0	0	0	0	0	0	0	0	0	0	0	1
Solyc00g139760.1.1	0	0	0	0	0	0	0	0	0	0	0	0
Solyc00g140060.2.1	317	804	160	698	247	378	433	924	245	957	321	1080
Solyc00g141360.1.1	0	0	0	0	0	0	0	0	0	0	0	0
Solyc00g141560.1.1	0	0	0	0	0	0	0	0	0	0	0	0
Solyc00g142160.1.1	2	5	2	4	4	3	11	17	1	9	1	11
Solyc00g142170.2.1	8	35	4	27	6	22	22	27	6	62	6	44
Solyc00g143770.1.1	61	71	28	38	38	39	25	49	15	116	41	61
Solyc00g144470.1.1	0	0	0	0	0	0	0	0	0	0	0	0
Solyc00g145170.1.1	0	1	0	0	0	0	0	0	0	0	0	0
Solyc00g147570.2.1	0	0	0	0	0	0	0	0	0	0	0	0
Solyc00g147770.1.1	0	1	0	0	0	1	0	3	0	0	1	3
Solyc00g149970.2.1	0	0	0	0	0	0	0	0	0	0	0	0
Solyc00g153680.1.1	0	0	0	0	0	0	0	0	0	0	0	0
Solyc00g153980.1.1	0	0	0	2	0	2	0	1	0	0	1	1
Solyc00g154480.1.1	0	0	0	0	0	0	0	0	0	0	0	0
Solyc00g154980.1.1	0	0	0	0	0	0	0	0	0	0	0	0
Solyc00g156980.2.1	376	968	156	475	163	357	315	939	83	548	136	399
Solyc00g157080.1.1	1	1	0	0	0	0	1	0	0	2	0	0
Solyc00g157180.2.1	2	3	0	2	0	2	0	5	0	0	1	2
Solyc00g160780.2.1	26	23	4	15	8	14	13	40	6	25	9	14
Solyc00g163580.1.1	0	0	0	0	0	0	0	0	0	0	0	0
Solyc00g164580.1.1	0	1	0	5	0	2	0	0	0	3	0	0
Solyc00g164680.1.1	46	107	23	130	39	48	49	128	35	152	39	155
Solyc00g165080.1.1	0	0	0	0	0	0	0	0	0	0	0	0
Solyc00g165090.1.1	0	0	0	0	0	0	0	0	0	0	0	0
Solyc00g165190.1.1	0	0	0	0	0	0	0	0	0	0	0	0
Solyc00g166190.1.1	0	0	0	0	0	0	0	0	0	0	0	0
Solyc00g166490.1.1	0	0	0	0	0	0	0	0	0	0	0	0
Solyc00g166690.1.1	0	3	0	1	2	0	1	0	0	0	0	0
Solyc00g167290.1.1	0	0	0	0	0	0	0	0	0	0	0	0
Solyc00g167300.1.1	0	0	0	0	0	0	0	0	0	0	0	0
Solyc00g167800.1.1	0	0	0	0	0	0	0	0	0	0	0	0
Solyc00g168200.1.1	5	9	3	7	0	3	2	18	1	13	4	6
Solyc00g170200.1.1	240	656	52	251	59	98	97	158	35	157	82	127
Solyc00g170210.2.1	146	291	99	238	112	144	162	390	80	371	116	228
Solyc00g170510.1.1	0	0	0	0	0	0	0	0	0	0	0	0
Solyc00g171710.1.1	0	0	0	0	0	0	0	0	0	0	0	0
Solyc00g171810.2.1	21	24	16	11	14	8	15	21	1	55	18	15
Solyc00g172410.1.1	0	0	0	0	0	0	0	0	0	0	0	0
Solyc00g173430.1.1	0	0	0	0	0	0	0	0	0	0	0	0
Solyc00g174330.2.1	0	0	0	0	0	0	0	0	0	0	0	0
Solyc00g174340.1.1	0	0	0	0	0	0	0	0	0	0	0	0
Solyc00g175240.1.1	0	0	0	0	0	0	0	0	0	0	0	0
Solyc00g178340.1.1	0	0	0	0	0	0	0	0	0	0	0	0
Solyc00g179240.1.1	26	67	32	66	35	40	42	78	4	32	9	30
Solyc00g179640.1.1	0	3	0	0	0	0	0	0	0	0	0	0
Solyc00g179840.1.1	0	0	0	0	0	0	0	0	0	0	0	0
Solyc00g180440.1.1	0	0	0	0	0	0	0	0	0	0	0	0
Solyc00g180840.1.1	0	0	0	0	0	0	0	0	0	0	0	0
Solyc00g181240.1.1	0	0	0	0	0	0	0	2	0	0	0	0
Solyc00g181250.2.1	0	0	0	0	1	0	0	0	0	0	0	0
Solyc00g183050.1.1	1	3	0	5	0	1	3	6	0	4	0	3
Solyc00g183550.1.1	0	0	0	0	0	0	0	0	0	0	0	0
Solyc00g184350.2.1	99	251	64	227	57	149	175	355	57	329	72	273
Solyc00g185750.1.1	0	0	0	0	0	0	0	0	0	0	0	0
Solyc00g185850.1.1	0	0	0	0	0	0	0	0	0	0	0	0
Solyc00g186050.1.1	352	694	216	679	372	462	442	777	263	731	356	849
Solyc00g187050.2.1	0	0	0	0	0	0	0	0	0	0	0	0
Solyc00g188250.1.1	0	0	0	0	0	0	0	0	0	0	0	0
Solyc00g188750.1.1	0	0	0	0	0	0	0	0	0	0	0	0
Solyc00g188850.2.1	1	6	1	1	0	0	0	2	0	1	1	3
Solyc00g192150.2.1	0	0	0	0	0	0	0	0	0	0	0	0
Solyc00g195350.1.1	0	0	0	0	0	0	0	0	0	0	0	0
Solyc00g195360.1.1	0	0	0	0	0	0	0	0	0	0	0	0
Solyc00g196060.2.1	1938	4766	988	4780	2179	3656	5369	10206	1458	5207	3380	9493
Solyc00g196460.1.1	0	0	0	0	0	0	0	0	0	0	0	0
Solyc00g198360.1.1	0	0	0	0	0	0	0	0	0	0	0	0
Solyc00g199960.1.1	0	0	0	0	0	0	0	0	0	0	0	0
Solyc00g201060.1.1	0	0	0	0	0	0	0	0	0	0	0	0
Solyc00g201160.2.1	32	69	13	92	32	47	55	110	20	136	36	99
Solyc00g201460.1.1	0	0	0	0	0	0	0	0	0	0	0	0
Solyc00g201760.1.1	0	0	0	0	0	0	0	0	0	0	0	0
Solyc00g202560.1.1	0	0	0	0	0	0	0	0	0	0	0	0
Solyc00g203660.1.1	0	0	0	0	0	0	0	0	0	0	0	0
Solyc00g206460.1.1	37	57	18	59	33	38	64	87	21	104	68	103
Solyc00g207960.1.1	0	0	0	0	0	0	0	0	0	0	0	0
Solyc00g209460.1.1	1	4	3	8	1	4	6	5	3	8	3	8
Solyc00g209560.1.1	0	0	0	0	0	0	0	0	0	0	0	0
Solyc00g210860.1.1	0	0	0	0	0	0	0	0	0	2	0	0
Solyc00g212260.1.1	0	0	0	0	0	0	0	0	0	0	0	0
Solyc00g213960.1.1	0	0	0	0	0	0	0	0	0	0	0	0
Solyc00g215560.1.1	1	2	0	0	1	0	1	3	0	5	0	4
Solyc00g217560.1.1	0	0	0	0	0	0	0	0	0	0	0	0
Solyc00g217960.1.1	4	7	3	12	2	8	7	8	6	27	13	18
Solyc00g218560.1.1	0	1	0	0	0	0	0	0	0	0	0	0
Solyc00g220360.1.1	0	0	0	0	0	0	0	0	0	0	0	0
Solyc00g222060.1.1	0	0	0	0	0	0	0	0	0	0	0	0
Solyc00g222460.1.1	0	0	0	0	0	0	0	0	0	0	0	0
Solyc00g226760.1.1	0	0	0	0	0	0	0	0	0	0	0	0
Solyc00g227860.1.1	74	252	66	204	43	106	137	252	86	372	100	347
Solyc00g227960.1.1	0	0	0	0	0	0	0	0	0	0	0	0
Solyc00g228260.1.1	0	0	0	0	0	0	0	0	0	0	0	0
Solyc00g229260.1.1	0	0	0	0	0	0	0	0	0	0	0	0
Solyc00g230060.1.1	0	5	0	2	0	4	4	1	0	5	4	0
Solyc00g230070.1.1	0	0	0	0	0	0	0	0	0	1	2	0
Solyc00g230080.1.1	3	4	2	4	0	1	3	7	0	3	1	1
Solyc00g230280.1.1	0	0	0	0	0	0	0	0	0	0	0	0
Solyc00g231680.1.1	0	0	0	0	0	0	0	2	2	2	0	0
Solyc00g231780.1.1	7	11	2	4	3	3	3	17	0	13	6	9
Solyc00g233480.1.1	1	2	0	0	0	0	0	0	0	0	0	0
Solyc00g237680.1.1	0	0	0	0	0	0	0	0	0	0	0	0
Solyc00g240580.1.1	0	0	0	0	0	0	0	0	0	0	0	0
Solyc00g244280.1.1	1	0	0	0	0	4	2	1	0	10	2	1
Solyc00g244290.1.1	16	10	15	8	12	10	13	14	2	50	13	9
Solyc00g244300.1.1	29	29	27	36	41	24	28	44	4	60	27	25
Solyc00g245200.1.1	0	0	0	0	0	0	0	0	0	0	0	0
Solyc00g246800.1.1	0	0	0	0	0	0	0	0	0	0	0	0
Solyc00g247300.2.1	0	0	0	0	0	0	2	0	2	6	3	4
Solyc00g249200.1.1	0	0	0	0	0	0	0	0	0	0	0	0
Solyc00g249900.2.1	6	25	5	22	7	18	10	17	5	18	5	16
Solyc00g249910.1.1	0	0	0	0	0	0	0	0	0	0	0	0
Solyc00g254110.1.1	0	0	0	0	0	0	0	0	0	0	0	0
Solyc00g254910.1.1	0	0	0	0	0	0	0	0	0	0	0	0
Solyc00g255510.1.1	0	0	0	0	0	0	0	0	0	0	0	0
Solyc00g256710.1.1	58	83	27	92	41	48	89	161	40	135	44	131
Solyc00g257110.2.1	1	3	7	7	7	4	4	6	1	14	0	10
Solyc00g263210.1.1	0	0	0	0	0	0	0	0	0	0	0	0
Solyc00g265110.2.1	0	0	0	0	0	0	0	0	0	0	0	0
Solyc00g265510.1.1	0	0	0	0	0	0	0	0	0	0	0	0
Solyc00g266110.1.1	0	0	0	0	0	0	0	0	0	0	0	0
Solyc00g268310.1.1	0	0	0	0	0	0	0	0	0	0	0	0
Solyc00g269810.1.1	0	0	0	0	0	0	0	0	0	0	0	0
Solyc00g270510.1.1	3	6	1	7	7	6	3	8	0	8	1	4
Solyc00g272810.1.1	0	2	0	0	0	0	0	0	0	0	0	0
Solyc00g273110.1.1	33	144	52	139	42	72	88	176	47	124	52	141
Solyc00g275310.1.1	0	0	0	0	0	0	0	0	0	0	0	0
Solyc00g277510.1.1	2	4	1	4	1	0	1	1	0	2	1	1
Solyc00g278110.2.1	0	4	2	0	0	0	2	4	2	3	0	4
Solyc00g280110.1.1	0	4	0	1	0	0	0	0	0	0	0	0
Solyc00g281110.1.1	0	2	0	0	0	0	0	0	0	1	1	0
Solyc00g282510.1.1	1	5	7	19	9	8	17	34	12	85	11	25
Solyc00g283010.1.1	0	0	0	0	0	0	0	0	0	0	0	0
Solyc00g283110.1.1	0	0	0	0	0	0	0	0	0	0	0	0
Solyc00g284510.1.1	0	0	0	0	0	0	0	0	0	0	0	0
Solyc00g286010.1.1	0	0	0	0	0	0	0	0	0	0	0	0
Solyc00g286020.1.1	0	0	0	0	0	0	0	0	0	0	0	0
Solyc00g286030.1.1	0	0	0	0	0	0	0	0	0	0	0	0
Solyc00g287330.1.1	0	0	0	0	0	0	0	0	0	0	0	0
Solyc00g289230.1.1	4	14	4	12	3	11	11	25	7	20	7	18
Solyc00g294230.1.1	0	0	0	0	0	1	0	0	0	0	0	2
Solyc00g294630.1.1	0	0	0	0	0	0	0	0	0	0	0	0
Solyc00g297330.1.1	0	0	0	0	0	0	0	0	0	0	0	0
Solyc00g300430.1.1	0	0	0	0	0	0	0	0	0	0	0	0
Solyc00g300730.1.1	0	0	0	0	0	0	0	0	0	0	0	0
Solyc00g303630.1.1	0	0	0	0	0	0	0	0	0	0	0	0
Solyc00g304030.1.1	0	0	0	1	0	0	0	0	0	0	0	0
Solyc00g304630.1.1	0	0	0	0	0	0	0	0	0	0	0	0
Solyc00g306730.1.1	0	0	0	0	0	0	0	0	0	0	0	0
Solyc00g306830.1.1	0	0	0	0	0	0	0	0	0	0	0	0
Solyc00g308530.1.1	0	0	0	0	0	0	0	0	0	0	0	0
Solyc00g308930.1.1	0	0	0	0	0	0	0	0	0	0	0	0
Solyc00g309530.1.1	0	0	0	0	0	0	0	2	0	0	0	0
Solyc00g311230.2.1	85	175	57	198	102	95	122	306	55	180	76	180
Solyc00g313030.1.1	0	0	0	0	0	0	0	0	0	0	0	0
Solyc00g313530.1.1	0	0	0	0	0	0	0	0	0	0	0	0
Solyc00g313930.1.1	0	0	0	0	0	0	0	0	0	0	0	0
Solyc00g316030.1.1	0	0	0	0	0	0	0	0	0	0	0	0
Solyc00g316530.1.1	4	3	0	3	4	1	6	2	2	17	8	6
Solyc00g316730.1.1	0	0	0	0	0	0	0	0	0	0	0	0
Solyc00g318030.1.1	0	0	0	0	0	0	0	0	0	0	0	0
Solyc00g318130.1.1	0	0	0	0	0	0	0	0	0	0	0	0
Solyc00g318830.1.1	0	0	0	0	0	0	0	0	0	0	0	0
Solyc00g320430.1.1	14	34	7	32	8	14	28	32	6	50	11	30
Solyc00g322630.1.1	0	0	0	0	0	0	0	0	0	0	0	0
Solyc00g322830.1.1	0	0	0	0	0	0	0	0	0	0	0	0
Solyc00g323130.2.1	2	8	0	3	0	1	29	57	14	64	24	79
Solyc00g324530.1.1	0	0	0	0	0	0	0	0	0	0	0	0
Solyc01g005000.2.1	73	134	25	129	57	71	367	733	209	820	690	2142
Solyc01g005010.2.1	125	302	94	319	168	161	127	333	7	24	13	28
Solyc01g005020.2.1	655	1863	322	1503	497	800	975	2018	450	1838	756	1986
Solyc01g005030.2.1	424	1157	264	1221	412	662	649	1495	367	1478	482	1317
Solyc01g005040.2.1	2	3	0	2	1	1	0	0	1	1	0	0
Solyc01g005050.2.1	0	0	0	0	0	0	0	0	0	0	0	0
Solyc01g005060.2.1	13	48	11	25	15	12	4	13	6	25	5	13
Solyc01g005070.2.1	4	2	1	4	0	1	1	4	0	2	0	1
Solyc01g005080.2.1	288	958	235	1043	303	491	561	1206	227	892	378	961
Solyc01g005090.2.1	0	0	0	0	0	0	0	0	0	0	0	0
Solyc01g005100.2.1	106	290	66	217	80	132	140	276	80	274	120	239
Solyc01g005110.2.1	55	173	41	120	51	87	84	159	60	211	80	199
Solyc01g005120.2.1	131	370	82	273	114	174	246	509	91	436	214	606
Solyc01g005130.2.1	77	177	64	214	46	78	41	109	10	48	32	109
Solyc01g005140.2.1	0	0	0	0	0	0	0	0	0	0	0	0
Solyc01g005150.2.1	0	0	0	0	0	0	0	0	0	0	0	0
Solyc01g005160.2.1	0	0	0	0	0	0	0	0	0	0	0	0
Solyc01g005170.1.1	1	6	3	10	3	7	3	9	3	5	1	7
Solyc01g005180.1.1	6	20	4	27	8	10	12	21	4	15	10	23
Solyc01g005190.1.1	2	13	4	8	4	7	9	17	3	15	9	16
Solyc01g005200.1.1	3	3	1	0	1	1	0	2	0	0	0	0
Solyc01g005210.2.1	891	2571	665	2545	826	1351	1489	3068	974	4264	1153	3507
Solyc01g005220.2.1	1	0	0	0	0	0	0	0	0	2	1	2
Solyc01g005230.2.1	0	0	0	0	0	1	0	0	1	0	0	0
Solyc01g005240.2.1	735	2165	372	1584	534	1071	1315	2446	715	2917	863	2403
Solyc01g005250.2.1	1200	3285	638	2975	1009	1530	1458	3093	990	3724	1083	2851
Solyc01g005260.2.1	33	70	29	76	29	24	37	93	22	108	23	79
Solyc01g005270.2.1	157	491	90	345	107	159	231	458	62	253	85	281
Solyc01g005280.2.1	59	112	36	116	33	35	54	97	27	82	37	96
Solyc01g005290.2.1	204	545	126	510	75	109	80	210	24	82	68	125
Solyc01g005300.2.1	24	64	16	94	40	64	125	246	50	292	101	251
Solyc01g005310.2.1	0	2	0	0	0	0	0	0	0	1	0	2
Solyc01g005320.2.1	1	6	3	17	7	10	10	10	1	13	15	19
Solyc01g005330.2.1	2422	6800	1565	5947	2248	3440	4038	7988	1874	7449	2731	7442
Solyc01g005340.2.1	91	248	44	255	75	113	139	311	79	281	116	292
Solyc01g005350.2.1	0	2	0	0	1	1	0	2	1	9	2	1
Solyc01g005360.2.1	0	0	0	0	0	0	0	0	0	2	1	0
Solyc01g005370.2.1	12	15	7	14	5	16	16	20	8	21	8	17
Solyc01g005380.2.1	219	548	89	486	167	255	301	637	162	691	225	652
Solyc01g005390.2.1	0	0	0	0	0	0	0	0	0	4	0	1
Solyc01g005400.2.1	0	0	0	0	0	0	0	0	0	0	0	0
Solyc01g005410.2.1	9	22	6	10	1	5	5	11	0	6	1	6
Solyc01g005420.2.1	0	0	0	0	0	0	0	0	0	0	0	0
Solyc01g005430.2.1	66	225	36	175	49	103	144	318	66	230	74	210
Solyc01g005440.2.1	1320	3337	820	3578	1371	1975	4183	7736	2238	9123	2921	8917
Solyc01g005450.2.1	7	9	5	5	0	5	0	7	5	7	1	9
Solyc01g005460.2.1	128	342	69	277	77	137	187	367	87	379	133	292
Solyc01g005470.2.1	0	0	2	0	0	0	0	0	0	0	0	1
Solyc01g005480.2.1	318	840	166	766	249	450	545	1125	267	895	332	856
Solyc01g005490.2.1	193	554	134	534	164	305	343	642	192	735	232	559
Solyc01g005500.2.1	2	0	0	0	1	0	0	0	0	2	0	3
Solyc01g005510.2.1	1	5	0	5	2	0	6	12	2	3	2	4
Solyc01g005520.2.1	153	453	84	312	75	140	170	327	97	355	99	243
Solyc01g005530.2.1	76	213	33	166	36	81	107	199	62	244	80	158
Solyc01g005540.2.1	269	677	138	578	188	314	373	734	222	742	257	666
Solyc01g005550.2.1	3311	9341	1651	7615	2038	4065	4139	8411	2076	8158	2487	6289
Solyc01g005560.2.1	1536	4067	686	2890	1257	2472	5242	8937	1474	5751	2702	7892
Solyc01g005570.2.1	191	544	113	438	153	228	289	516	197	623	197	488
Solyc01g005580.2.1	216	521	100	371	129	228	328	614	184	706	216	544
Solyc01g005590.2.1	107	231	113	163	143	113	122	239	56	183	91	193
Solyc01g005600.2.1	450	1291	276	1109	363	569	736	1506	343	1274	457	1255
Solyc01g005610.2.1	0	0	0	0	0	2	0	2	0	1	1	0
Solyc01g005620.2.1	5137	14386	3171	12295	4512	6858	8608	16124	5261	21650	6254	17359
Solyc01g005630.1.1	0	0	0	0	0	0	0	0	0	0	0	0
Solyc01g005640.2.1	234	614	157	612	156	292	353	682	177	695	252	697
Solyc01g005650.1.1	0	0	0	0	0	0	0	0	0	0	0	0
Solyc01g005660.1.1	0	0	0	0	0	0	0	0	0	0	0	0
Solyc01g005670.2.1	64	251	41	203	65	112	126	244	80	244	92	195
Solyc01g005680.2.1	0	0	0	0	0	0	0	0	1	0	0	0
Solyc01g005690.2.1	380	1218	250	1070	394	646	833	1547	360	1216	400	1112
Solyc01g005700.2.1	353	1096	275	1031	328	615	706	1432	329	1271	436	1216
Solyc01g005710.2.1	0	0	0	0	0	0	0	0	0	0	0	0
Solyc01g005720.2.1	0	0	0	0	0	0	0	0	0	0	0	0
Solyc01g005730.2.1	0	0	0	0	0	0	0	0	0	0	0	0
Solyc01g005740.2.1	0	0	0	0	0	0	0	1	0	0	0	0
Solyc01g005750.1.1	0	0	0	0	0	0	0	0	0	0	0	0
Solyc01g005760.2.1	1	5	2	3	1	2	1	2	4	11	1	2
Solyc01g005770.2.1	41	133	41	144	48	86	68	138	50	149	51	119
Solyc01g005780.1.1	3	15	2	9	3	12	8	22	5	10	3	13
Solyc01g005790.1.1	121	468	84	409	138	234	254	479	110	494	183	421
Solyc01g005800.2.1	42	133	16	92	16	56	68	145	34	148	43	115
Solyc01g005810.2.1	845	2734	544	2142	664	1250	1751	3216	741	2767	1011	2479
Solyc01g005820.2.1	4270	11519	3104	11522	4927	6962	8229	14730	3508	12728	4586	12729
Solyc01g005830.2.1	1014	2679	643	2455	868	1411	1394	2901	536	1814	740	1966
Solyc01g005840.2.1	133	313	67	223	101	141	162	312	83	328	110	283
Solyc01g005850.1.1	18	46	11	38	23	30	32	63	8	48	33	47
Solyc01g005860.2.1	1	10	1	4	1	4	5	7	1	8	3	4
Solyc01g005870.1.1	0	0	0	0	0	0	0	0	0	0	1	0
Solyc01g005880.1.1	0	0	0	0	0	0	0	0	0	0	0	0
Solyc01g005890.1.1	0	0	0	0	0	0	0	0	0	0	0	0
Solyc01g005900.2.1	39	69	19	52	14	33	29	63	28	84	29	65
Solyc01g005910.2.1	141	406	81	367	91	190	222	451	65	334	126	338
Solyc01g005920.2.1	41	92	29	98	39	46	72	148	17	82	29	86
Solyc01g005930.2.1	36	126	25	102	30	64	59	108	48	142	36	90
Solyc01g005940.2.1	0	0	0	0	0	0	0	2	0	0	0	0
Solyc01g005950.2.1	591	1600	361	1385	467	778	936	1851	502	1816	665	1576
Solyc01g005960.2.1	1740	4764	1131	4769	1673	2611	2793	5356	1570	6385	2302	6089
Solyc01g005970.2.1	169	496	118	459	157	230	255	562	130	503	166	512
Solyc01g005980.2.1	88	223	40	190	56	102	134	232	98	359	70	214
Solyc01g005990.2.1	233	678	103	422	119	275	251	560	193	769	138	399
Solyc01g006000.2.1	397	1214	249	1179	369	617	720	1259	248	956	338	875
Solyc01g006010.2.1	350	1052	209	948	352	565	679	1323	382	1531	399	1265
Solyc01g006020.2.1	188	580	97	623	145	264	356	716	170	1018	222	881
Solyc01g006030.2.1	172	483	92	418	180	251	287	583	147	567	207	473
Solyc01g006040.2.1	179	447	81	458	131	229	264	513	127	545	175	536
Solyc01g006050.2.1	0	0	1	0	0	0	0	0	0	0	0	0
Solyc01g006060.2.1	0	0	0	0	0	0	0	0	0	0	0	0
Solyc01g006070.2.1	0	0	0	0	0	0	0	0	0	0	0	0
Solyc01g006080.1.1	0	0	1	0	0	2	0	3	0	2	2	2
Solyc01g006090.2.1	126	338	86	302	135	213	274	483	124	503	167	439
Solyc01g006100.2.1	2146	6132	1207	4824	1640	2793	3255	6672	1414	5665	1972	5483
Solyc01g006110.2.1	588	1606	341	1385	523	822	977	1793	497	1894	637	1933
Solyc01g006120.2.1	3577	10209	2377	10767	3287	5517	5947	11937	2967	11314	3569	10606
Solyc01g006130.2.1	72	242	53	187	38	94	95	190	55	233	80	164
Solyc01g006140.2.1	138	412	88	264	117	177	275	393	163	487	131	472
Solyc01g006150.2.1	316	1012	212	736	264	458	482	946	297	1090	316	809
Solyc01g006160.2.1	5080	11960	3339	10548	4857	7296	8517	14056	5066	15052	6301	15528
Solyc01g006170.2.1	469	1188	265	881	339	639	877	1481	322	1623	574	1561
Solyc01g006180.2.1	318	923	201	803	279	471	666	1219	328	1255	414	1120
Solyc01g006190.2.1	2468	7846	1905	8542	2568	4521	5121	9300	1628	6221	2729	6701
Solyc01g006200.2.1	16	37	0	26	5	14	10	25	1	15	2	6
Solyc01g006210.2.1	208	578	134	489	188	309	389	609	189	629	224	599
Solyc01g006220.2.1	287	836	154	730	242	478	514	988	251	925	326	776
Solyc01g006230.2.1	471	1326	311	1168	456	625	822	1529	363	1399	514	1343
Solyc01g006240.2.1	0	1	0	0	0	0	0	0	0	0	0	0
Solyc01g006250.1.1	14	37	16	39	15	32	32	56	14	48	19	55
Solyc01g006260.2.1	78	276	69	235	117	152	181	326	94	271	113	290
Solyc01g006270.2.1	0	0	0	0	0	0	0	0	0	0	0	0
Solyc01g006280.2.1	1375	3527	683	2976	970	1582	1916	3781	959	3676	1402	3944
Solyc01g006290.2.1	0	1	0	0	0	1	1	0	1	5	2	9
Solyc01g006300.2.1	1	2	0	0	0	2	1	1	1	7	1	15
Solyc01g006310.2.1	0	0	0	0	0	0	0	0	0	0	0	0
Solyc01g006320.2.1	33	113	14	57	23	18	23	54	25	88	17	71
Solyc01g006330.2.1	78	202	36	164	41	58	64	114	32	96	40	97
Solyc01g006340.2.1	146	425	89	378	157	226	266	543	168	549	202	496
Solyc01g006350.2.1	2050	6251	1152	5770	1751	3432	3713	7785	1722	6640	2385	6487
Solyc01g006360.2.1	781	1999	407	1872	626	1159	1054	2543	634	2288	712	2705
Solyc01g006370.2.1	8996	25513	4488	22552	6806	12741	13036	29054	7013	26994	8927	26170
Solyc01g006380.2.1	0	0	0	0	0	0	0	0	0	0	0	0
Solyc01g006390.2.1	721	1614	595	1791	1420	1496	2464	4487	2516	8525	1528	3886
Solyc01g006400.2.1	5677	15191	2962	11289	6206	9209	16090	27312	12934	43598	19447	51333
Solyc01g006410.2.1	1	0	1	1	0	2	0	4	0	1	0	0
Solyc01g006420.2.1	0	0	2	2	0	0	4	2	0	2	1	2
Solyc01g006430.2.1	4918	14373	3526	17693	6420	9277	14310	24005	8648	37311	11089	30470
Solyc01g006440.1.1	0	1	0	0	0	0	0	0	0	0	0	0
Solyc01g006450.2.1	579	1818	336	1321	536	839	1014	2027	719	2409	907	2355
Solyc01g006460.1.1	3	0	0	0	0	0	0	0	0	0	0	0
Solyc01g006470.1.1	0	0	0	0	0	0	0	0	0	0	0	0
Solyc01g006480.2.1	192	573	102	471	173	334	399	671	188	650	219	601
Solyc01g006490.2.1	150	436	101	402	138	246	272	521	134	544	184	512
Solyc01g006500.2.1	131	399	78	375	119	194	210	450	128	457	152	390
Solyc01g006510.2.1	476	1246	312	1346	491	700	739	1331	401	1634	476	1376
Solyc01g006520.2.1	20	29	11	52	8	33	32	37	13	116	31	79
Solyc01g006530.1.1	0	0	0	0	0	0	0	0	0	0	0	0
Solyc01g006540.2.1	1	31	11	26	22	19	24	44	61	253	80	90
Solyc01g006550.2.1	0	0	0	0	0	0	0	0	0	0	0	0
Solyc01g006560.2.1	0	0	0	0	0	0	0	0	0	1	0	0
Solyc01g006570.1.1	0	0	0	0	0	0	0	0	0	0	0	0
Solyc01g006580.2.1	0	0	0	0	0	0	0	0	0	2	1	2
Solyc01g006590.1.1	0	0	0	0	0	0	0	0	0	0	0	0
Solyc01g006600.1.1	0	0	0	0	0	0	0	0	0	0	0	0
Solyc01g006610.1.1	0	0	0	0	0	0	0	0	0	0	0	0
Solyc01g006620.2.1	0	0	0	0	0	0	0	0	0	0	0	1
Solyc01g006630.2.1	616	1741	365	1551	587	914	1048	2034	516	2030	644	1996
Solyc01g006640.1.1	0	0	0	0	0	0	0	0	0	0	0	0
Solyc01g006650.1.1	53	214	55	207	52	148	124	231	53	235	85	212
Solyc01g006660.1.1	55	154	44	152	64	164	1723	2662	917	2491	2749	6634
Solyc01g006670.2.1	5	3	6	10	3	10	33	72	8	57	28	92
Solyc01g006680.2.1	210	549	145	617	199	371	557	1015	185	628	242	515
Solyc01g006690.2.1	112	324	54	285	58	90	62	159	26	194	37	90
Solyc01g006700.2.1	1546	4369	822	3729	1070	2128	2336	4793	1228	4459	1625	4476
Solyc01g006710.2.1	646	2070	424	1661	505	1017	1252	2386	576	2078	738	1965
Solyc01g006720.2.1	20	60	12	26	3	5	1	0	3	9	0	19
Solyc01g006730.2.1	9	35	3	45	6	15	23	29	6	40	10	16
Solyc01g006740.2.1	140	447	116	443	132	233	236	479	208	628	191	528
Solyc01g006750.2.1	0	0	0	0	0	0	0	0	0	0	0	0
Solyc01g006760.2.1	0	0	0	0	0	0	0	0	0	0	0	0
Solyc01g006770.1.1	0	0	0	0	0	0	0	0	0	0	0	0
Solyc01g006780.2.1	67	157	63	165	83	59	46	148	30	118	32	88
Solyc01g006790.2.1	201	445	186	445	197	257	202	427	105	336	110	333
Solyc01g006800.2.1	1187	3552	764	3339	1108	2033	2145	4031	1347	4791	1575	4387
Solyc01g006810.2.1	216	598	132	600	194	339	340	597	200	742	193	615
Solyc01g006820.2.1	198	414	122	416	178	261	282	657	175	634	165	503
Solyc01g006830.2.1	490	1219	336	1262	468	669	576	1290	301	1123	381	964
Solyc01g006840.2.1	0	0	0	0	0	0	0	0	0	0	0	0
Solyc01g006850.1.1	62	179	24	129	44	88	109	198	48	205	76	163
Solyc01g006860.2.1	156	570	135	509	171	264	295	579	136	551	243	537
Solyc01g006870.2.1	118	428	94	372	142	216	244	456	135	449	145	402
Solyc01g006880.2.1	488	1457	281	1486	430	792	907	1915	368	1492	490	1403
Solyc01g006890.2.1	972	2805	590	2812	807	1302	1519	3086	745	2893	854	2577
Solyc01g006900.2.1	1772	5441	1151	4547	1535	2594	2712	5318	1427	5317	1752	4825
Solyc01g006910.2.1	0	0	0	0	0	0	0	0	0	0	0	0
Solyc01g006920.2.1	52	158	24	116	44	84	89	160	26	111	28	119
Solyc01g006930.2.1	137	442	125	532	217	315	195	317	37	185	58	130
Solyc01g006940.2.1	307	790	161	684	186	412	438	872	233	784	289	683
Solyc01g006950.2.1	2	2	2	3	1	4	0	1	0	3	1	2
Solyc01g006960.2.1	540	1448	326	1458	423	785	957	2036	376	1725	603	1591
Solyc01g006970.2.1	940	2759	532	2575	813	1313	1621	3195	732	2838	1014	2629
Solyc01g006980.2.1	698	1806	364	1462	531	986	986	1997	571	1982	721	1941
Solyc01g006990.2.1	221	699	119	658	188	323	400	834	198	769	250	681
Solyc01g007000.2.1	0	0	0	0	0	0	0	0	0	0	0	0
Solyc01g007010.2.1	5	5	2	7	2	4	1	2	0	1	0	4
Solyc01g007020.2.1	4	17	5	7	2	4	0	1	1	5	0	2
Solyc01g007030.2.1	0	0	0	0	0	0	0	0	0	0	0	0
Solyc01g007040.2.1	0	0	0	0	0	0	0	0	0	0	0	0
Solyc01g007050.1.1	1	0	0	0	0	0	0	0	0	0	0	0
Solyc01g007060.2.1	445	1445	289	1151	339	694	977	1790	476	1977	772	1883
Solyc01g007070.2.1	101	307	72	241	96	99	118	249	50	230	89	225
Solyc01g007080.2.1	4	9	2	3	2	1	1	2	1	5	0	8
Solyc01g007090.1.1	0	0	0	0	0	1	0	0	0	0	0	0
Solyc01g007100.2.1	641	1827	420	1588	462	679	845	1739	185	775	429	1120
Solyc01g007110.2.1	380	1065	255	1219	467	694	726	1368	378	1364	605	1522
Solyc01g007120.2.1	320	1043	203	889	345	498	657	1266	315	1273	434	1130
Solyc01g007130.2.1	892	2534	539	2170	782	1175	1444	2948	386	1644	657	1884
Solyc01g007140.2.1	166	488	75	358	140	222	323	638	159	639	246	722
Solyc01g007150.2.1	1879	5207	884	4251	1370	2581	2896	6079	1338	5804	1932	5555
Solyc01g007160.2.1	93	288	47	198	86	144	153	243	70	295	96	284
Solyc01g007170.2.1	1269	3192	592	3011	1273	1744	1750	3275	1057	3469	1116	3047
Solyc01g007180.2.1	41	115	32	110	38	63	65	153	38	162	42	97
Solyc01g007190.2.1	17	59	17	65	25	11	34	83	36	110	19	48
Solyc01g007200.2.1	867	2282	579	2107	605	813	913	1949	969	3287	530	1391
Solyc01g007210.2.1	0	0	0	0	0	0	0	0	0	0	0	0
Solyc01g007220.2.1	0	1	0	1	3	5	0	0	1	11	1	8
Solyc01g007230.2.1	123	253	56	189	101	131	165	314	91	318	125	322
Solyc01g007240.2.1	2	1	3	4	1	4	3	5	0	1	1	5
Solyc01g007250.2.1	149	439	77	307	84	219	262	475	140	531	204	511
Solyc01g007260.2.1	29	67	21	69	10	12	29	27	0	11	6	31
Solyc01g007270.1.1	52	161	31	152	92	125	276	519	38	176	125	340
Solyc01g007280.2.1	9	19	7	24	13	20	22	32	3	40	10	12
Solyc01g007290.1.1	5	4	3	2	5	3	5	6	0	9	1	8
Solyc01g007300.1.1	4	20	2	10	3	4	2	3	3	23	1	5
Solyc01g007310.2.1	0	3	2	0	1	2	2	0	0	10	2	3
Solyc01g007320.2.1	5393	11680	3344	8605	3945	4846	6845	13669	2922	13284	3661	9839
Solyc01g007330.2.1	137	373	77	361	105	144	152	229	69	321	87	164
Solyc01g007340.2.1	11	13	3	1	4	10	2	7	3	14	1	1
Solyc01g007350.2.1	1	3	1	3	0	3	0	2	0	5	1	2
Solyc01g007360.2.1	1	3	0	2	0	2	3	3	0	2	0	0
Solyc01g007370.2.1	1	3	2	5	0	8	0	11	3	7	2	3
Solyc01g007380.1.1	11	20	2	2	4	4	9	14	2	8	2	3
Solyc01g007390.1.1	0	0	0	0	0	1	2	0	1	4	0	0
Solyc01g007400.1.1	22	19	6	6	5	7	15	38	2	20	6	10
Solyc01g007410.2.1	38	91	26	81	33	40	47	115	28	72	26	56
Solyc01g007420.2.1	0	0	0	4	2	0	0	2	1	1	1	1
Solyc01g007430.2.1	0	0	0	0	1	0	1	0	0	1	0	0
Solyc01g007440.1.1	0	1	1	0	0	0	0	1	0	0	1	0
Solyc01g007450.1.1	0	0	0	0	0	0	0	1	0	0	0	1
Solyc01g007460.2.1	4	12	3	4	1	3	6	30	5	21	2	10
Solyc01g007470.1.1	14	20	8	17	17	15	14	45	6	49	12	33
Solyc01g007480.1.1	12	8	7	6	6	5	7	26	3	40	11	14
Solyc01g007490.2.1	702	1364	645	1279	819	750	1123	2641	608	3245	786	2014
Solyc01g007500.2.1	55	142	28	115	38	73	82	163	32	167	45	106
Solyc01g007510.1.1	0	0	0	0	0	0	0	0	0	0	0	0
Solyc01g007520.2.1	0	7	0	1	2	1	2	6	1	5	0	0
Solyc01g007530.2.1	13	21	4	18	6	3	12	23	0	18	4	12
Solyc01g007540.2.1	4	4	1	7	0	3	3	6	0	5	0	2
Solyc01g007550.1.1	0	0	0	0	0	0	0	0	0	0	0	0
Solyc01g007560.2.1	0	0	0	1	2	1	3	4	0	2	0	2
Solyc01g007570.2.1	1	1	3	2	2	2	1	3	0	9	6	5
Solyc01g007580.2.1	0	0	0	0	0	0	0	0	0	0	0	0
Solyc01g007590.2.1	0	0	0	0	0	0	0	0	0	0	0	0
Solyc01g007600.2.1	28	83	13	64	17	41	34	84	11	104	13	65
Solyc01g007610.2.1	45	160	40	102	42	53	91	170	37	202	41	92
Solyc01g007620.2.1	0	0	0	0	0	0	0	0	0	0	0	0
Solyc01g007630.2.1	296	441	257	459	306	277	351	500	140	1072	194	310
Solyc01g007640.2.1	28	28	3	12	5	11	12	21	1	52	8	9
Solyc01g007650.2.1	0	0	0	0	1	0	1	0	0	2	0	0
Solyc01g007660.2.1	4	11	2	8	1	3	10	8	0	8	1	4
Solyc01g007670.2.1	42	39	8	20	15	16	8	43	2	52	13	24
Solyc01g007680.1.1	0	0	0	2	0	0	0	0	0	0	2	0
Solyc01g007690.2.1	18	18	7	16	13	9	11	18	0	41	9	4
Solyc01g007700.2.1	27	47	20	85	23	43	14	53	12	48	11	24
Solyc01g007710.2.1	316	220	107	188	75	147	133	111	11	489	170	64
Solyc01g007720.2.1	61	90	33	59	25	48	40	45	17	100	40	37
Solyc01g007730.2.1	632	2236	320	2095	321	1205	1027	1497	442	1927	589	946
Solyc01g007740.2.1	314	838	162	608	179	323	374	683	237	764	255	644
Solyc01g007750.2.1	136	409	126	347	140	206	263	487	114	445	140	364
Solyc01g007760.2.1	455	1313	281	1086	430	728	814	1557	418	1385	549	1270
Solyc01g007770.2.1	31	56	14	74	29	37	39	78	31	96	43	79
Solyc01g007780.2.1	18	37	6	31	20	21	35	46	8	58	17	51
Solyc01g007790.2.1	144	358	77	291	105	176	242	546	138	461	152	390
Solyc01g007800.2.1	151	418	109	314	169	237	260	765	146	623	159	497
Solyc01g007810.1.1	57	175	30	128	44	96	91	213	50	203	40	145
Solyc01g007820.1.1	9	31	3	11	6	13	12	47	7	29	10	36
Solyc01g007830.1.1	2	13	2	3	1	7	8	9	2	21	5	18
Solyc01g007840.2.1	268	748	192	802	277	394	396	885	223	777	210	678
Solyc01g007850.2.1	242	639	132	587	156	307	345	702	167	739	266	666
Solyc01g007860.2.1	2388	6807	1669	6485	2320	3419	3898	7488	2140	7500	2762	7119
Solyc01g007870.2.1	434	1143	254	998	357	567	617	1102	239	949	563	1205
Solyc01g007880.2.1	213	663	153	633	199	336	441	858	202	820	234	692
Solyc01g007890.1.1	11	17	5	13	9	20	38	68	24	164	19	40
Solyc01g007900.2.1	306	936	168	795	253	410	424	781	277	938	366	789
Solyc01g007910.2.1	897	2298	441	1824	814	1325	1486	2937	716	2686	1032	2894
Solyc01g007920.2.1	30	89	31	118	36	60	57	118	32	124	41	122
Solyc01g007930.2.1	190	610	152	711	232	324	379	765	215	798	257	623
Solyc01g007940.2.1	0	2	0	1	0	0	0	0	0	0	0	0
Solyc01g007950.2.1	120	327	78	376	129	216	289	577	112	392	179	408
Solyc01g007960.2.1	0	0	0	3	0	0	0	0	1	0	0	0
Solyc01g007970.1.1	0	1	0	0	0	0	0	0	0	0	0	0
Solyc01g007980.2.1	9	42	2	30	10	22	17	48	16	55	16	42
Solyc01g007990.2.1	150	436	111	401	112	231	297	443	112	385	161	390
Solyc01g008000.2.1	3991	10534	3009	12486	4442	6395	6348	11677	2977	12508	3467	10022
Solyc01g008010.2.1	166	446	108	379	114	206	244	443	97	390	157	357
Solyc01g008020.2.1	461	1197	277	1235	362	602	746	1389	423	1485	502	1464
Solyc01g008030.2.1	0	0	0	0	0	0	0	0	0	0	0	0
Solyc01g008040.1.1	0	4	0	0	0	0	0	0	0	1	0	1
Solyc01g008050.2.1	0	0	0	0	0	0	0	0	0	0	0	0
Solyc01g008060.2.1	937	2582	602	2424	816	1287	1644	3456	903	3812	1252	3368
Solyc01g008070.2.1	123	329	81	364	106	166	185	374	109	316	119	315
Solyc01g008080.2.1	4173	10007	3194	10277	4090	5351	6579	11877	4114	12503	4469	11921
Solyc01g008090.2.1	990	2344	506	2067	854	1408	1464	2782	832	2818	964	3331
Solyc01g008100.2.1	185	427	91	415	139	226	292	572	205	779	264	676
Solyc01g008110.2.1	3682	9605	1909	8363	3018	5227	7442	14682	5673	23893	6140	18348
Solyc01g008120.2.1	1727	5185	1099	5041	1610	2939	3057	6388	1658	6385	2266	6452
Solyc01g008130.2.1	45	152	28	114	37	52	93	176	48	186	48	144
Solyc01g008140.2.1	366	1093	224	1017	305	524	645	1221	291	1040	378	1057
Solyc01g008150.1.1	2	6	5	9	6	4	8	4	2	8	4	10
Solyc01g008160.2.1	233	687	136	554	190	316	407	735	164	790	252	686
Solyc01g008170.2.1	1006	2977	605	2865	793	1491	1581	3133	749	2967	1045	3010
Solyc01g008180.2.1	1130	3171	701	3011	1063	1511	1480	2859	793	3210	1068	2665
Solyc01g008190.2.1	123	290	83	305	112	196	194	365	111	331	116	356
Solyc01g008200.2.1	90	174	60	184	57	124	107	251	46	187	63	173
Solyc01g008210.2.1	75	252	77	275	147	154	159	243	93	323	164	339
Solyc01g008220.2.1	14	53	8	37	18	20	45	76	18	74	22	44
Solyc01g008230.2.1	1042	2896	709	2913	907	1350	1549	2838	684	2253	944	2303
Solyc01g008240.2.1	0	0	0	0	0	0	0	0	0	0	0	0
Solyc01g008250.2.1	132	421	92	419	109	181	235	395	104	358	119	309
Solyc01g008260.2.1	116	419	64	270	95	152	257	373	116	377	135	315
Solyc01g008270.2.1	548	1586	274	1267	409	752	905	1657	442	1645	616	1460
Solyc01g008280.2.1	423	1114	201	927	396	595	675	1408	316	1239	492	1459
Solyc01g008290.2.1	322	881	184	725	252	514	539	1048	250	916	372	971
Solyc01g008300.1.1	1	2	0	1	1	0	0	4	0	12	1	2
Solyc01g008310.2.1	1356	3937	659	3081	1085	1932	2542	4929	1286	4975	1690	4643
Solyc01g008320.2.1	340	1053	180	970	292	496	540	1177	256	998	389	1174
Solyc01g008330.2.1	1201	2869	417	2101	682	1402	1287	2615	681	2590	903	2893
Solyc01g008340.2.1	238	715	130	583	183	371	488	897	189	625	300	804
Solyc01g008350.2.1	29	110	35	104	45	75	66	99	23	97	44	86
Solyc01g008360.2.1	7	13	3	12	8	11	5	10	4	9	7	3
Solyc01g008370.2.1	2910	9403	1817	8331	2356	4207	5471	10233	2733	11080	3675	9504
Solyc01g008380.1.1	16	58	11	55	11	30	40	75	13	63	20	59
Solyc01g008390.1.1	0	0	0	0	0	1	0	0	0	2	0	0
Solyc01g008400.2.1	14	43	2	33	8	17	26	49	7	39	12	31
Solyc01g008410.1.1	0	3	0	1	0	1	2	0	1	0	0	0
Solyc01g008420.2.1	0	2	1	4	3	1	5	8	3	8	3	4
Solyc01g008430.1.1	0	0	0	0	0	0	0	0	0	0	0	0
Solyc01g008440.2.1	202	585	115	545	171	268	299	578	97	333	141	362
Solyc01g008450.1.1	0	2	0	1	0	0	1	0	0	0	1	0
Solyc01g008460.2.1	86	275	49	299	98	165	226	407	115	360	146	327
Solyc01g008470.2.1	223	655	141	526	177	323	375	710	192	722	286	741
Solyc01g008480.2.1	83	318	96	283	86	166	154	393	108	430	123	366
Solyc01g008490.2.1	98	329	76	334	96	177	231	409	77	380	106	310
Solyc01g008500.2.1	3	18	2	15	7	14	12	4	1	17	3	19
Solyc01g008510.2.1	0	0	0	0	0	0	0	0	0	0	0	0
Solyc01g008520.2.1	52	204	49	205	45	83	138	236	90	323	77	198
Solyc01g008530.2.1	321	931	170	738	216	416	522	864	277	964	333	940
Solyc01g008540.2.1	0	0	0	0	0	0	1	0	0	1	0	5
Solyc01g008550.2.1	2168	5726	1044	5333	1624	3036	3090	6065	1108	4900	1475	4597
Solyc01g008560.2.1	189	576	150	531	177	325	324	560	128	648	203	539
Solyc01g008570.1.1	0	0	0	0	0	0	0	0	0	0	0	0
Solyc01g008580.1.1	0	0	0	0	0	0	0	0	0	0	0	0
Solyc01g008590.1.1	0	0	0	0	0	0	0	0	0	0	0	0
Solyc01g008600.2.1	3252	9595	2023	8782	2572	4671	4949	10096	2281	8677	3801	10885
Solyc01g008610.2.1	0	0	0	0	0	0	0	0	0	0	0	0
Solyc01g008620.2.1	0	0	0	0	0	0	0	0	0	0	0	0
Solyc01g008640.2.1	0	0	0	0	0	0	0	0	0	0	0	0
Solyc01g008650.2.1	0	0	0	0	0	0	0	0	0	0	1	0
Solyc01g008660.2.1	232	736	185	756	233	447	556	1113	280	1046	343	884
Solyc01g008670.2.1	1	5	0	3	2	2	5	5	8	30	7	14
Solyc01g008680.2.1	2	8	1	8	1	8	3	8	3	22	4	13
Solyc01g008690.2.1	0	0	0	0	0	0	0	0	0	0	0	0
Solyc01g008700.2.1	173	613	134	547	128	254	361	687	180	633	211	579
Solyc01g008710.2.1	0	0	0	0	0	0	0	0	0	0	0	0
Solyc01g008720.1.1	0	0	0	0	0	0	0	0	0	0	0	0
Solyc01g008730.2.1	198	549	123	624	213	298	359	660	224	709	258	621
Solyc01g008740.1.1	0	0	0	0	0	0	0	0	0	0	0	0
Solyc01g008750.1.1	0	0	0	0	0	0	0	0	0	0	0	0
Solyc01g008760.2.1	79	191	49	206	52	108	130	242	63	236	93	205
Solyc01g008770.2.1	1490	4274	914	4124	1293	2199	2211	4895	1098	4490	1464	4039
Solyc01g008780.2.1	446	1202	308	1434	363	573	664	1377	275	1139	384	890
Solyc01g008790.2.1	72	205	60	194	72	91	120	209	65	223	80	316
Solyc01g008800.1.1	29	89	8	58	14	23	13	31	5	36	19	41
Solyc01g008810.2.1	841	2544	619	2567	880	1274	1568	2621	928	3514	1126	2821
Solyc01g008820.2.1	628	1704	326	1333	419	751	938	1692	492	1709	619	1659
Solyc01g008830.1.1	0	0	0	0	0	0	0	0	0	0	0	0
Solyc01g008840.2.1	491	1364	265	1154	401	609	798	1518	316	1446	520	1358
Solyc01g008850.2.1	73	209	20	107	14	48	31	81	6	44	13	65
Solyc01g008860.1.1	0	0	0	0	0	0	0	0	0	0	0	1
Solyc01g008870.1.1	0	0	0	0	0	0	0	0	0	0	0	0
Solyc01g008880.1.1	0	0	0	0	0	0	0	0	0	0	0	0
Solyc01g008890.2.1	312	954	216	828	312	422	557	1162	283	1014	339	867
Solyc01g008900.2.1	145	432	117	374	150	208	254	547	127	493	189	454
Solyc01g008910.2.1	229	690	176	688	279	405	526	983	387	1515	483	1143
Solyc01g008920.2.1	45	127	21	103	20	31	58	98	26	117	30	61
Solyc01g008930.2.1	482	1308	325	1036	331	530	635	1247	287	1005	361	847
Solyc01g008940.2.1	1	1	0	0	0	0	1	1	0	1	0	0
Solyc01g008950.2.1	3111	8666	2079	8360	2563	4422	5264	9978	2559	10759	3283	9208
Solyc01g008960.2.1	21858	61569	12544	65934	20320	32594	35823	72929	17624	67438	24690	73449
Solyc01g008970.2.1	10469	29645	7455	29513	11562	16559	18674	32510	11166	37691	14318	35072
Solyc01g008980.2.1	70	219	51	276	102	145	191	273	76	243	108	240
Solyc01g008990.2.1	235	673	128	604	178	342	474	814	205	762	321	661
Solyc01g009000.2.1	367	968	286	1114	426	529	707	1341	368	1621	474	1402
Solyc01g009010.2.1	239	634	143	627	204	312	390	768	202	855	255	760
Solyc01g009020.2.1	170	498	124	365	156	188	267	400	133	500	215	550
Solyc01g009030.2.1	545	1359	318	1195	475	835	970	1963	478	1662	641	1665
Solyc01g009040.2.1	1980	5833	1033	4700	1656	3025	3471	7296	1723	7465	2295	6392
Solyc01g009050.2.1	645	1662	352	1773	576	919	949	2014	578	2352	767	2290
Solyc01g009060.2.1	672	1882	506	1768	591	968	1164	2580	518	2228	751	2011
Solyc01g009070.2.1	172	508	136	419	190	248	279	575	209	771	278	697
Solyc01g009080.2.1	97	210	75	263	77	91	80	143	51	170	56	152
Solyc01g009090.2.1	3229	8454	1997	8663	3206	4947	5371	10539	2851	9582	3495	10278
Solyc01g009100.2.1	2085	5284	1179	3871	1717	2854	2967	5678	1674	5041	2312	5240
Solyc01g009110.2.1	46	172	33	128	46	82	82	171	59	181	61	176
Solyc01g009120.2.1	14	45	4	50	7	26	26	56	19	64	23	52
Solyc01g009130.1.1	0	0	0	0	0	0	0	0	0	0	0	0
Solyc01g009140.1.1	0	0	0	0	0	0	0	0	0	0	0	0
Solyc01g009150.2.1	145	415	110	411	141	224	302	496	101	451	160	399
Solyc01g009160.2.1	14	39	8	22	12	18	29	50	11	31	21	54
Solyc01g009170.2.1	1077	2777	621	3024	907	1428	1501	3115	779	3434	857	2798
Solyc01g009180.2.1	631	1579	320	1342	533	825	894	2004	565	2324	857	2444
Solyc01g009190.1.1	1	3	0	3	1	0	0	0	0	0	0	2
Solyc01g009200.2.1	0	3	0	0	0	0	0	0	0	0	0	0
Solyc01g009210.1.1	0	0	0	0	0	0	0	0	0	0	0	0
Solyc01g009220.2.1	0	0	0	0	0	1	0	0	0	0	0	0
Solyc01g009230.2.1	286	785	116	580	180	351	302	663	261	946	278	915
Solyc01g009240.2.1	16	69	19	31	1	16	8	9	10	28	11	18
Solyc01g009250.2.1	5	9	7	8	5	3	6	4	3	10	4	14
Solyc01g009260.1.1	0	0	0	0	0	0	0	0	0	0	0	0
Solyc01g009270.1.1	0	0	0	0	0	0	0	0	0	0	0	0
Solyc01g009280.2.1	741	2051	517	2277	864	1369	1376	2690	704	2376	968	2642
Solyc01g009290.2.1	612	1574	344	1424	483	902	975	2140	511	1981	628	1740
Solyc01g009300.2.1	438	1343	254	1114	351	514	827	1521	260	1219	596	1368
Solyc01g009310.2.1	957	2659	461	2146	733	1299	1174	2575	663	2421	877	2617
Solyc01g009320.1.1	0	0	0	0	0	0	0	0	0	0	0	0
Solyc01g009330.1.1	1	0	0	1	0	2	0	3	0	1	0	0
Solyc01g009340.2.1	213	575	131	417	93	156	133	279	68	320	103	275
Solyc01g009350.2.1	0	1	0	0	0	1	0	0	0	1	0	0
Solyc01g009360.1.1	0	0	0	0	0	0	0	0	0	0	0	0
Solyc01g009370.1.1	0	0	0	1	0	0	0	0	0	0	0	3
Solyc01g009380.2.1	170	505	106	408	176	269	311	699	163	605	156	488
Solyc01g009390.2.1	224	581	137	547	176	298	339	667	197	713	230	609
Solyc01g009400.2.1	0	0	0	0	0	0	0	0	0	0	0	0
Solyc01g009410.2.1	0	0	0	0	1	0	0	0	1	0	0	0
Solyc01g009420.2.1	1614	3776	928	3478	1381	1976	2367	4441	1125	4293	1438	4123
Solyc01g009430.2.1	52	137	37	116	58	68	44	93	34	118	41	135
Solyc01g009440.1.1	0	2	0	0	0	0	0	0	0	0	0	0
Solyc01g009450.2.1	358	1128	250	976	385	606	664	1152	349	1364	451	1267
Solyc01g009460.2.1	0	0	0	0	0	0	0	0	0	0	0	0
Solyc01g009470.1.1	0	0	0	0	2	0	0	0	0	0	0	1
Solyc01g009480.2.1	0	0	0	0	0	0	0	0	0	0	0	0
Solyc01g009490.1.1	0	0	0	0	0	0	0	0	0	0	0	0
Solyc01g009500.2.1	76	177	39	136	39	51	56	102	26	115	37	83
Solyc01g009510.1.1	0	0	0	0	0	0	0	0	0	0	0	0
Solyc01g009520.2.1	1861	5193	1017	3828	1317	2588	3235	5663	1445	5780	1885	5185
Solyc01g009530.1.1	0	0	0	0	0	0	0	2	0	0	2	0
Solyc01g009540.1.1	0	0	0	0	0	0	0	0	0	0	0	0
Solyc01g009550.1.1	2	6	2	4	5	4	5	22	0	15	3	14
Solyc01g009560.1.1	0	0	0	0	0	0	0	0	0	0	0	0
Solyc01g009570.2.1	31	126	30	77	17	34	49	90	23	98	29	69
Solyc01g009580.1.1	0	0	0	0	0	0	0	0	0	0	0	0
Solyc01g009590.2.1	0	0	0	0	0	0	0	0	0	0	0	0
Solyc01g009600.2.1	0	0	0	0	0	0	0	0	0	0	0	0
Solyc01g009610.2.1	256	621	128	529	189	252	266	556	157	621	192	549
Solyc01g009620.2.1	215	629	120	474	162	280	336	629	131	547	214	575
Solyc01g009630.2.1	445	1091	251	834	296	512	634	1234	300	1198	437	1002
Solyc01g009640.1.1	0	0	0	0	0	0	0	0	0	0	0	0
Solyc01g009650.1.1	0	0	0	0	0	0	0	0	0	0	0	0
Solyc01g009660.1.1	0	0	0	0	0	0	0	0	0	0	0	0
Solyc01g009670.2.1	79	271	43	183	68	105	113	237	72	241	73	209
Solyc01g009680.2.1	0	0	0	0	0	0	0	0	0	0	0	0
Solyc01g009690.1.1	0	0	0	0	0	0	0	0	0	0	0	0
Solyc01g009700.1.1	0	0	0	0	0	0	0	0	0	0	0	0
Solyc01g009710.1.1	0	0	0	0	0	0	0	0	0	0	0	0
Solyc01g009720.1.1	15	31	7	42	10	11	34	40	15	68	21	65
Solyc01g009730.1.1	0	0	0	0	0	0	0	0	0	0	0	0
Solyc01g009740.1.1	0	0	0	0	0	0	0	0	0	0	0	0
Solyc01g009750.2.1	790	2299	713	2956	1110	1600	1628	2555	833	2579	1084	2494
Solyc01g009760.2.1	57	185	38	142	31	66	37	99	24	92	28	107
Solyc01g009770.2.1	151	463	99	441	139	245	229	387	127	487	157	460
Solyc01g009780.2.1	103	285	68	274	92	145	178	310	81	275	125	248
Solyc01g009790.1.1	0	0	0	0	0	0	0	0	0	0	0	0
Solyc01g009800.1.1	0	0	0	0	0	0	0	0	0	0	0	0
Solyc01g009810.2.1	0	0	0	0	0	0	0	0	0	0	0	0
Solyc01g009820.2.1	268	861	173	869	261	407	433	1057	244	1033	313	901
Solyc01g009830.2.1	0	0	0	0	0	0	0	0	0	1	0	0
Solyc01g009840.1.1	0	0	0	0	0	0	0	0	0	0	0	0
Solyc01g009850.2.1	697	1836	431	1513	581	963	1130	1746	575	1941	833	1875
Solyc01g009860.2.1	71	139	30	113	50	69	164	341	62	225	70	137
Solyc01g009870.2.1	0	1	0	5	2	0	0	0	0	2	0	1
Solyc01g009880.2.1	0	0	0	0	0	0	0	0	0	0	0	0
Solyc01g009890.1.1	8	6	0	8	0	1	2	1	0	8	0	2
Solyc01g009900.2.1	2	21	1	7	0	7	3	9	3	21	4	5
Solyc01g009910.1.1	1	5	3	0	0	2	2	2	0	1	0	2
Solyc01g009920.1.1	0	0	0	0	0	0	0	0	0	0	0	0
Solyc01g009930.1.1	0	0	0	0	0	0	0	0	0	0	0	0
Solyc01g009940.1.1	0	0	0	0	0	0	0	0	0	0	0	0
Solyc01g009950.1.1	0	0	0	0	0	0	0	0	0	0	0	0
Solyc01g009960.2.1	0	0	0	0	0	0	0	0	0	0	0	0
Solyc01g009970.2.1	268	766	115	529	126	303	377	780	189	718	247	635
Solyc01g009980.1.1	0	0	0	0	0	0	0	0	0	0	0	0
Solyc01g009990.2.1	1793	4441	897	3268	1247	2228	2507	5031	1465	6058	1657	5157
Solyc01g010000.2.1	103	299	71	261	91	174	278	540	102	309	304	648
Solyc01g010010.1.1	0	4	0	0	0	1	1	0	0	0	0	1
Solyc01g010020.2.1	44	125	43	143	43	53	47	124	27	90	30	95
Solyc01g010030.2.1	366	1109	219	1142	319	630	723	1328	275	1159	405	1054
Solyc01g010040.2.1	0	0	0	0	0	0	0	0	0	0	0	0
Solyc01g010050.2.1	0	0	0	0	0	0	0	0	0	0	0	0
Solyc01g010060.2.1	1	0	0	1	0	1	2	2	0	0	1	3
Solyc01g010070.1.1	0	0	0	0	0	0	0	0	0	0	0	0
Solyc01g010080.2.1	1	0	0	0	0	1	3	2	0	1	2	1
Solyc01g010090.1.1	0	0	0	0	0	0	0	0	0	0	0	0
Solyc01g010100.1.1	0	0	0	0	0	0	0	0	0	0	0	0
Solyc01g010110.1.1	0	0	0	0	0	0	0	0	0	0	0	0
Solyc01g010120.1.1	0	0	0	0	0	0	0	0	0	0	0	0
Solyc01g010130.2.1	153	400	140	461	440	782	2179	4019	344	1517	1271	3227
Solyc01g010140.1.1	0	0	0	0	0	0	0	0	0	1	0	0
Solyc01g010150.2.1	1118	3131	845	4032	1859	3410	6840	12258	1700	5552	5326	12385
Solyc01g010160.2.1	0	0	0	0	0	0	0	0	0	0	0	0
Solyc01g010170.1.1	0	0	0	0	0	0	0	0	0	0	0	0
Solyc01g010180.2.1	174	423	53	222	73	119	114	230	27	106	37	134
Solyc01g010190.2.1	16	63	18	44	21	33	29	65	14	65	30	70
Solyc01g010200.2.1	3	20	2	4	0	7	14	22	13	25	9	22
Solyc01g010210.1.1	0	0	0	0	0	0	0	0	0	0	0	0
Solyc01g010220.2.1	32	112	14	77	38	78	117	221	37	118	47	98
Solyc01g010230.2.1	0	1	3	2	1	2	6	21	11	31	10	28
Solyc01g010240.2.1	57	151	26	106	35	64	27	70	8	17	8	4
Solyc01g010250.2.1	57	153	40	165	45	89	63	147	92	271	35	97
Solyc01g010260.2.1	0	1	0	0	0	0	0	0	0	0	0	0
Solyc01g010270.2.1	249	569	148	467	188	205	203	394	138	345	178	331
Solyc01g010280.2.1	0	0	0	4	0	0	1	0	0	0	0	0
Solyc01g010290.2.1	135	400	116	412	151	212	233	413	123	442	181	406
Solyc01g010300.1.1	0	0	0	0	0	0	0	0	0	0	0	0
Solyc01g010310.2.1	943	2374	520	2208	1019	1444	1413	3044	670	2538	989	2624
Solyc01g010320.1.1	0	0	0	0	0	0	0	0	0	0	0	0
Solyc01g010330.1.1	0	0	0	0	0	0	0	0	0	0	0	0
Solyc01g010340.1.1	0	0	0	0	0	0	0	0	0	1	1	0
Solyc01g010350.2.1	2	12	0	3	0	3	3	2	11	25	0	4
Solyc01g010360.2.1	0	0	0	0	0	0	0	0	0	0	0	0
Solyc01g010370.2.1	285	870	196	680	233	419	415	871	194	796	264	634
Solyc01g010380.2.1	0	0	0	0	0	0	0	0	0	0	0	0
Solyc01g010390.2.1	40	111	30	111	22	30	22	91	11	51	19	39
Solyc01g010400.1.1	0	0	0	0	0	0	0	0	0	0	0	0
Solyc01g010410.2.1	14	21	7	16	5	8	7	11	6	23	5	17
Solyc01g010420.2.1	0	0	0	0	0	0	0	0	0	0	0	0
Solyc01g010430.2.1	5	26	9	17	6	21	36	49	12	63	20	56
Solyc01g010440.2.1	1726	5091	1243	5766	1894	3026	3975	7022	2232	8364	2585	7021
Solyc01g010450.1.1	0	0	0	0	0	0	0	0	0	0	0	0
Solyc01g010460.2.1	69	201	30	168	37	102	104	252	63	268	79	188
Solyc01g010470.2.1	77	258	53	230	62	112	170	302	83	262	89	228
Solyc01g010480.2.1	4	0	1	3	1	1	1	5	0	8	0	6
Solyc01g010490.2.1	0	0	0	0	0	0	0	0	0	0	0	0
Solyc01g010500.1.1	0	0	0	2	1	0	0	0	0	0	0	1
Solyc01g010510.2.1	67	228	35	167	44	96	144	282	59	197	61	192
Solyc01g010520.2.1	598	1622	374	1500	540	842	1008	2054	393	1917	750	1951
Solyc01g010530.1.1	0	0	0	0	0	0	0	0	0	0	0	0
Solyc01g010540.2.1	1015	1873	469	1554	684	1154	1306	2173	422	2396	828	1941
Solyc01g010550.1.1	0	0	0	0	0	0	0	0	0	0	0	0
Solyc01g010570.2.1	296	905	222	727	274	440	553	1092	320	1093	358	867
Solyc01g010580.2.1	2006	3751	1015	3259	1341	1846	2223	4220	967	5521	1638	4024
Solyc01g010590.2.1	137	481	79	325	118	181	282	480	148	575	187	519
Solyc01g010600.2.1	4	6	0	4	1	0	4	15	6	21	4	14
Solyc01g010610.1.1	0	0	0	0	0	0	0	0	0	0	0	0
Solyc01g010630.1.1	1	0	0	0	0	0	0	0	0	0	0	0
Solyc01g010640.2.1	192	564	130	480	180	285	315	606	151	480	173	419
Solyc01g010650.2.1	499	1304	369	1725	669	809	947	1646	440	1421	584	1204
Solyc01g010660.2.1	333	887	244	940	315	484	525	1037	347	1297	478	1277
Solyc01g010670.1.1	0	0	0	0	0	0	0	0	0	0	0	0
Solyc01g010680.1.1	1	0	1	0	0	0	0	0	0	0	0	0
Solyc01g010690.1.1	1	0	0	0	0	2	1	0	0	1	1	0
Solyc01g010700.2.1	49	144	24	130	32	48	45	91	48	166	50	137
Solyc01g010710.2.1	9	69	9	28	8	20	95	165	61	230	97	255
Solyc01g010720.2.1	0	0	0	0	0	0	0	0	0	0	1	0
Solyc01g010730.1.1	0	0	0	0	0	0	0	0	0	0	0	0
Solyc01g010740.2.1	0	0	0	1	0	0	0	0	0	1	0	0
Solyc01g010750.2.1	2062	5367	1311	5484	2127	3038	3317	6079	1671	6802	2550	6911
Solyc01g010760.2.1	2577	6690	1391	6182	2163	3939	4241	7644	1982	7817	2604	7573
Solyc01g010770.2.1	6	6	2	17	2	4	3	4	0	11	1	9
Solyc01g010780.2.1	608	1656	422	1698	573	920	1082	2328	518	2060	777	1948
Solyc01g010790.1.1	0	0	0	0	0	0	0	0	0	0	0	0
Solyc01g010800.1.1	0	0	0	0	0	0	0	0	0	0	0	0
Solyc01g010810.2.1	149	396	107	444	215	228	244	479	169	532	198	496
Solyc01g010820.2.1	836	2221	423	1987	707	1117	1294	2772	595	2644	915	2564
Solyc01g010830.2.1	143	365	90	268	97	168	202	448	170	532	172	468
Solyc01g010840.1.1	0	0	0	0	0	0	0	0	0	0	0	0
Solyc01g010850.1.1	0	0	0	0	0	0	0	0	0	0	0	0
Solyc01g010860.2.1	78	258	47	207	85	100	133	242	59	252	89	185
Solyc01g010870.2.1	501	1453	368	1428	433	759	848	1847	482	1767	597	1826
Solyc01g010880.2.1	188	488	117	476	208	269	283	554	142	577	190	518
Solyc01g010890.2.1	0	1	0	0	0	0	0	0	0	0	0	2
Solyc01g010900.2.1	0	0	0	0	0	0	0	0	0	0	0	0
Solyc01g010910.1.1	4	10	2	5	3	9	3	14	1	14	2	3
Solyc01g010920.1.1	47	173	43	163	74	92	125	237	57	173	60	179
Solyc01g010930.2.1	63	232	54	187	60	101	122	235	62	253	82	218
Solyc01g010940.2.1	180	474	92	349	128	236	252	516	126	489	225	488
Solyc01g010950.2.1	179	433	98	444	159	195	261	460	142	474	149	400
Solyc01g010960.1.1	216	269	77	215	127	154	149	326	36	578	120	305
Solyc01g010970.2.1	316	787	202	835	355	576	875	1957	809	3187	667	1887
Solyc01g010980.1.1	65	219	34	168	70	123	159	299	83	285	130	303
Solyc01g010990.2.1	123	330	76	302	88	155	197	415	92	325	99	267
Solyc01g011000.2.1	2367	6294	1217	5250	1838	3478	4447	7736	2188	8723	3015	8536
Solyc01g011010.2.1	4	11	3	2	6	5	11	19	4	8	3	15
Solyc01g011020.1.1	0	0	0	0	0	0	0	1	0	0	0	0
Solyc01g011030.2.1	239	696	188	670	246	371	459	811	216	808	265	673
Solyc01g011040.2.1	565	1618	329	1354	407	767	951	1695	440	1668	578	1476
Solyc01g011050.2.1	0	0	0	0	0	0	0	0	0	0	0	0
Solyc01g011060.1.1	0	2	0	1	1	2	1	2	1	1	1	0
Solyc01g011070.1.1	0	0	0	0	0	0	0	0	0	0	0	0
Solyc01g011080.2.1	60	138	28	152	44	77	103	167	42	144	69	124
Solyc01g011090.2.1	78	242	41	226	64	112	152	282	45	246	78	253
Solyc01g011100.2.1	499	1564	288	1505	422	867	904	1766	435	1820	574	1525
Solyc01g011110.1.1	0	0	0	0	0	0	0	0	0	0	0	0
Solyc01g011130.1.1	0	0	0	0	0	0	0	0	0	0	0	0
Solyc01g011150.1.1	0	0	0	0	0	0	0	0	0	0	0	0
Solyc01g011170.1.1	0	0	0	0	0	0	0	0	0	0	0	0
Solyc01g011180.1.1	1	3	2	6	3	2	2	3	1	6	1	6
Solyc01g011190.1.1	0	0	0	0	0	0	0	1	0	0	0	0
Solyc01g011200.2.1	3	29	7	25	16	6	10	23	6	20	10	15
Solyc01g011220.1.1	11	26	8	28	10	20	21	29	7	23	11	23
Solyc01g011230.2.1	7	24	3	21	5	8	17	41	1	13	6	21
Solyc01g011240.1.1	0	0	0	0	0	0	0	0	0	0	0	0
Solyc01g011250.1.1	0	0	0	0	0	1	0	0	0	0	1	0
Solyc01g011260.1.1	0	0	0	0	0	0	0	0	0	0	0	0
Solyc01g011270.1.1	0	0	0	0	0	0	0	0	0	0	0	0
Solyc01g011280.1.1	0	0	0	0	0	0	0	0	0	0	0	0
Solyc01g011290.1.1	0	0	0	0	0	0	0	0	0	0	0	0
Solyc01g011300.1.1	0	0	0	0	0	0	0	0	0	0	0	0
Solyc01g011310.1.1	0	0	0	0	0	0	0	0	0	0	0	0
Solyc01g011320.1.1	0	0	0	0	0	0	0	0	0	0	0	0
Solyc01g011330.1.1	0	0	0	0	0	0	0	0	0	0	0	0
Solyc01g011340.2.1	666	1989	453	1678	601	1019	1111	2354	564	2065	700	2031
Solyc01g011350.2.1	377	1203	249	1001	318	618	707	1651	486	1714	445	1162
Solyc01g011370.1.1	0	0	0	0	0	0	0	0	0	0	0	0
Solyc01g011390.2.1	0	0	0	0	0	0	0	0	0	0	0	0
Solyc01g011400.1.1	0	0	0	0	0	0	0	0	0	0	0	0
Solyc01g011410.1.1	10	14	3	19	2	8	7	33	3	29	7	24
Solyc01g011420.1.1	0	0	0	1	0	0	1	8	0	1	0	1
Solyc01g011430.2.1	5	9	2	3	1	2	1	3	0	1	1	4
Solyc01g011450.1.1	0	0	0	0	0	0	1	0	0	0	0	0
Solyc01g011460.1.1	0	0	0	0	0	1	0	0	1	0	0	0
Solyc01g011470.1.1	0	0	0	0	0	0	0	0	0	0	0	0
Solyc01g011480.1.1	0	0	0	0	0	0	0	0	0	0	0	0
Solyc01g011490.1.1	0	0	0	1	0	2	2	1	0	2	0	0
Solyc01g011500.1.1	0	0	0	0	0	0	0	0	0	0	0	0
Solyc01g011510.2.1	9	29	1	3	3	10	6	15	4	30	1	25
Solyc01g011520.1.1	0	0	0	0	0	0	0	0	0	0	0	0
Solyc01g011530.1.1	0	0	0	0	0	0	0	0	0	0	0	0
Solyc01g011540.1.1	0	0	0	0	0	0	0	0	0	0	0	0
Solyc01g012540.1.1	0	0	0	0	0	0	0	0	0	0	0	0
Solyc01g012550.1.1	0	0	0	0	0	0	0	0	0	0	0	0
Solyc01g012560.1.1	0	0	0	0	0	0	0	0	0	0	0	0
Solyc01g012570.1.1	0	0	0	0	0	0	0	0	0	0	0	0
Solyc01g012580.1.1	1	1	0	3	0	2	2	3	4	12	1	10
Solyc01g012590.1.1	0	0	0	0	0	0	0	0	0	0	0	0
Solyc01g012600.1.1	0	0	0	0	0	0	0	0	0	0	0	0
Solyc01g012610.1.1	0	0	0	0	0	0	0	0	0	0	0	0
Solyc01g012620.1.1	0	0	0	0	0	0	0	0	0	0	0	0
Solyc01g012630.1.1	0	0	0	0	0	0	0	0	0	0	0	0
Solyc01g012640.1.1	0	0	0	0	0	0	0	0	0	0	0	0
Solyc01g012650.1.1	0	0	0	0	0	0	0	0	0	0	0	0
Solyc01g012660.1.1	0	0	0	0	0	0	0	0	0	0	0	0
Solyc01g012670.1.1	0	0	0	0	0	0	0	0	0	0	0	0
Solyc01g012680.1.1	0	0	0	0	0	0	0	0	0	0	0	0
Solyc01g012690.1.1	0	0	0	0	0	0	0	0	0	0	0	0
Solyc01g012700.2.1	0	0	0	0	0	0	0	0	0	0	0	0
Solyc01g012710.1.1	0	0	0	0	0	0	0	0	0	0	0	0
Solyc01g012720.1.1	0	0	0	0	0	0	0	0	0	0	0	0
Solyc01g012730.1.1	0	0	0	0	0	0	0	0	0	0	0	0
Solyc01g012740.1.1	0	0	0	0	0	0	0	0	0	0	0	0
Solyc01g012750.1.1	0	0	0	0	0	0	0	0	0	0	0	0
Solyc01g012760.1.1	0	0	0	0	0	0	0	0	0	0	0	0
Solyc01g013760.1.1	0	0	0	0	0	0	0	0	0	0	0	0
Solyc01g013770.1.1	0	0	0	0	0	0	0	0	0	0	0	0
Solyc01g013780.1.1	0	0	0	0	0	0	0	0	0	0	0	0
Solyc01g013790.1.1	0	0	0	0	0	0	0	0	0	0	0	0
Solyc01g013800.1.1	0	0	0	0	0	0	0	0	0	0	0	0
Solyc01g013810.1.1	0	0	0	0	0	0	0	0	0	0	0	0
Solyc01g013820.1.1	0	0	0	0	0	0	0	0	0	0	0	0
Solyc01g013830.1.1	0	0	0	0	0	0	0	0	0	0	0	0
Solyc01g013840.1.1	0	0	0	0	0	0	0	0	0	0	0	0
Solyc01g013850.1.1	0	0	0	0	0	0	0	0	0	0	0	0
Solyc01g013860.1.1	0	0	0	0	0	0	0	0	0	0	0	0
Solyc01g013870.1.1	0	0	0	0	0	0	0	0	0	0	0	0
Solyc01g013880.1.1	0	0	0	0	0	0	0	0	0	0	0	0
Solyc01g013890.1.1	0	0	0	0	0	0	0	0	0	0	0	0
Solyc01g013900.2.1	0	0	0	0	0	0	0	0	0	0	0	0
Solyc01g013910.1.1	0	0	0	0	0	0	0	0	0	0	0	0
Solyc01g013920.1.1	0	0	0	0	0	0	0	0	0	0	0	0
Solyc01g013930.1.1	0	0	0	0	0	0	0	0	0	0	0	0
Solyc01g013940.1.1	0	0	0	0	0	0	0	0	0	0	0	0
Solyc01g013950.1.1	0	0	0	0	0	0	0	0	0	0	0	0
Solyc01g013960.1.1	0	0	0	0	0	0	0	0	0	0	0	0
Solyc01g013970.1.1	0	0	0	0	0	0	0	0	0	0	0	0
Solyc01g013980.1.1	0	0	0	0	0	0	0	0	0	0	0	0
Solyc01g013990.1.1	0	0	0	0	0	0	0	0	0	0	0	0
Solyc01g014000.1.1	0	0	0	0	0	0	0	0	0	0	0	0
Solyc01g014010.1.1	0	0	0	0	0	0	0	0	0	0	0	0
Solyc01g014020.1.1	0	0	0	0	0	0	0	0	0	0	0	0
Solyc01g014030.1.1	0	0	0	0	0	0	0	0	0	0	0	0
Solyc01g014040.1.1	0	0	0	0	0	0	0	0	0	0	0	0
Solyc01g014050.1.1	0	0	0	0	0	0	0	0	0	0	0	0
Solyc01g014060.1.1	0	0	0	0	0	0	0	0	0	0	0	0
Solyc01g014070.1.1	0	0	0	0	0	0	0	0	0	0	0	0
Solyc01g014080.1.1	0	0	0	0	0	0	0	0	0	0	0	0
Solyc01g014090.1.1	0	1	0	1	0	0	0	0	0	0	0	0
Solyc01g014100.2.1	33	48	7	34	2	7	4	16	0	1	0	1
Solyc01g014110.2.1	14	87	14	79	17	22	17	16	9	47	15	21
Solyc01g014120.2.1	20	93	24	50	17	24	16	61	7	50	11	31
Solyc01g014130.1.1	0	0	0	0	0	0	0	0	0	0	0	0
Solyc01g014140.2.1	1	6	0	1	1	0	1	1	0	1	0	0
Solyc01g014150.1.1	0	0	0	0	0	0	0	3	0	1	0	0
Solyc01g014160.1.1	0	0	0	0	0	0	0	0	0	0	0	0
Solyc01g014170.1.1	0	0	0	0	0	0	0	0	0	0	0	0
Solyc01g014180.2.1	1519	4649	1269	5374	1899	2674	3557	6059	1837	6799	2428	6233
Solyc01g014190.1.1	0	0	0	0	0	0	0	0	0	0	0	0
Solyc01g014200.1.1	6	19	8	19	11	9	23	16	8	20	5	16
Solyc01g014210.1.1	0	0	0	0	0	0	0	0	0	0	0	0
Solyc01g014220.1.1	2	1	1	0	0	0	0	0	0	4	3	1
Solyc01g014230.2.1	212	581	126	506	174	300	363	808	174	689	213	715
Solyc01g014240.1.1	0	0	0	0	0	0	0	0	0	0	0	0
Solyc01g014250.2.1	60	169	37	206	212	361	1258	2460	300	1054	826	2102
Solyc01g014260.1.1	0	0	0	0	0	1	0	1	0	0	1	2
Solyc01g014270.2.1	32	114	19	116	25	41	92	129	30	86	27	92
Solyc01g014280.2.1	197	838	48	250	19	140	31	91	55	78	57	148
Solyc01g014290.1.1	13	47	4	10	2	10	1	1	3	4	1	11
Solyc01g014300.1.1	0	4	1	0	0	0	0	0	0	1	0	0
Solyc01g014310.1.1	0	0	0	0	0	0	0	0	0	0	0	0
Solyc01g014320.2.1	0	1	0	0	0	1	0	0	0	0	0	0
Solyc01g014330.2.1	0	0	0	0	0	0	0	0	0	0	0	0
Solyc01g014340.1.1	0	0	0	0	0	0	0	0	0	0	0	0
Solyc01g014350.1.1	0	0	0	0	0	0	0	0	0	0	0	0
Solyc01g014360.1.1	0	0	0	0	0	0	0	0	0	0	0	0
Solyc01g014370.1.1	0	0	0	0	0	0	0	0	0	0	0	0
Solyc01g014380.2.1	9	42	10	29	9	25	13	28	9	48	11	17
Solyc01g014390.2.1	0	0	0	0	1	2	3	3	2	4	0	0
Solyc01g014400.1.1	0	0	0	0	0	0	0	0	0	0	0	0
Solyc01g014410.1.1	0	0	0	0	0	0	0	0	0	0	0	0
Solyc01g014420.1.1	0	0	0	0	0	0	0	0	0	0	0	0
Solyc01g014430.1.1	0	0	0	0	0	0	0	0	0	0	0	0
Solyc01g014440.1.1	0	0	0	0	0	0	0	0	0	0	0	0
Solyc01g014450.1.1	0	0	0	0	0	0	0	0	0	0	0	0
Solyc01g014460.1.1	0	0	0	0	0	0	0	0	0	0	0	0
Solyc01g014470.1.1	9	30	5	27	10	12	18	36	4	38	10	24
Solyc01g014480.2.1	288	815	172	802	246	403	448	960	236	851	305	802
Solyc01g014490.2.1	381	1146	185	863	274	498	598	1227	335	1278	397	1031
Solyc01g014500.1.1	0	0	0	0	0	0	0	0	0	0	0	0
Solyc01g014510.1.1	0	0	0	0	0	0	0	0	0	0	0	0
Solyc01g014520.1.1	0	0	0	0	0	0	0	0	0	0	0	0
Solyc01g014530.2.1	0	0	0	0	0	0	0	0	0	0	0	0
Solyc01g014540.1.1	0	0	0	0	0	0	0	0	0	0	0	0
Solyc01g014550.1.1	0	0	0	0	0	0	0	0	0	0	0	0
Solyc01g014560.2.1	0	0	0	0	0	0	0	0	0	0	0	0
Solyc01g014570.1.1	0	0	0	0	0	0	0	0	0	0	0	0
Solyc01g014580.1.1	0	0	0	0	0	0	0	0	0	0	0	0
Solyc01g014600.1.1	0	0	0	0	0	0	0	0	0	0	0	0
Solyc01g014610.1.1	0	0	0	0	1	1	0	1	0	2	2	3
Solyc01g014620.1.1	27	56	8	42	10	34	29	55	5	33	8	25
Solyc01g014630.1.1	0	0	0	0	0	0	0	0	0	0	0	0
Solyc01g014640.1.1	0	0	0	0	0	0	0	0	0	0	0	0
Solyc01g014650.1.1	0	0	0	0	0	0	0	0	0	0	0	0
Solyc01g014660.1.1	0	0	0	0	0	0	0	0	0	0	0	0
Solyc01g014670.1.1	0	0	0	0	0	0	0	0	0	0	0	0
Solyc01g014680.1.1	0	0	0	0	0	0	0	0	0	0	0	0
Solyc01g014690.2.1	0	0	0	0	0	0	0	0	0	0	0	0
Solyc01g014700.2.1	0	0	0	0	0	0	0	0	0	0	0	0
Solyc01g014710.1.1	0	0	0	0	0	0	0	0	0	0	0	0
Solyc01g014720.1.1	0	0	0	0	0	0	0	0	0	0	0	0
Solyc01g014730.1.1	0	0	0	0	0	0	0	0	0	0	0	0
Solyc01g014740.1.1	0	0	0	1	0	0	0	0	0	0	0	0
Solyc01g014760.1.1	0	0	0	0	0	0	0	0	0	0	0	0
Solyc01g014770.1.1	0	0	0	0	0	0	0	0	0	0	0	0
Solyc01g014780.1.1	0	0	0	0	0	0	0	0	0	0	0	0
Solyc01g014790.1.1	0	0	0	0	0	0	0	0	0	0	0	0
Solyc01g014800.1.1	0	0	0	0	0	0	0	0	0	0	0	0
Solyc01g014820.1.1	0	0	0	0	0	0	0	0	0	0	0	0
Solyc01g014830.1.1	0	0	0	0	0	0	0	0	0	0	0	0
Solyc01g014840.2.1	7	19	1	13	2	2	5	14	8	25	9	30
Solyc01g014850.2.1	717	1836	440	1614	661	1030	1266	2490	804	3195	1041	2731
Solyc01g014860.2.1	0	0	0	0	0	0	0	0	0	0	0	0
Solyc01g014870.1.1	0	0	0	0	0	0	0	0	0	0	0	0
Solyc01g014880.2.1	0	0	0	0	0	0	0	0	0	0	0	0
Solyc01g014890.1.1	0	0	0	0	0	0	0	0	0	0	0	0
Solyc01g014900.1.1	0	0	0	0	0	0	0	0	0	0	0	0
Solyc01g014910.1.1	0	0	0	0	0	0	0	0	0	0	0	0
Solyc01g014920.1.1	0	0	0	0	0	0	0	0	0	0	0	0
Solyc01g014930.1.1	0	0	0	0	0	0	0	0	0	0	0	0
Solyc01g014940.1.1	0	0	0	0	0	0	0	0	0	0	0	0
Solyc01g014950.1.1	0	0	0	0	0	0	0	0	0	0	0	0
Solyc01g014960.1.1	0	0	0	0	0	0	0	0	0	0	0	0
Solyc01g014970.1.1	0	0	0	0	0	0	0	0	0	0	0	0
Solyc01g014980.2.1	0	0	0	0	0	0	0	0	0	0	0	0
Solyc01g014990.1.1	0	0	1	0	0	0	0	0	0	0	0	0
Solyc01g015000.2.1	1	0	0	0	0	0	0	0	0	0	0	1
Solyc01g015010.1.1	0	0	0	0	0	0	0	0	0	0	0	0
Solyc01g015020.2.1	738	2381	512	2279	732	1227	1347	2597	601	2499	980	2582
Solyc01g015030.1.1	0	0	0	0	0	0	0	0	0	0	0	0
Solyc01g015040.1.1	12	22	3	21	4	14	11	21	7	17	13	9
Solyc01g015050.1.1	19	52	15	10	8	33	27	70	14	59	13	33
Solyc01g015060.1.1	23	55	7	15	8	30	48	77	11	56	14	52
Solyc01g015070.2.1	83	245	113	276	111	151	179	334	70	255	82	184
Solyc01g015080.2.1	0	0	0	0	0	0	0	0	0	0	0	0
Solyc01g015090.1.1	0	0	0	0	0	0	0	0	0	0	0	0
Solyc01g015100.1.1	0	0	0	0	0	0	0	0	0	0	0	0
Solyc01g015110.1.1	0	1	0	0	0	0	2	2	0	1	0	0
Solyc01g015120.1.1	0	0	0	0	0	0	0	0	0	0	0	0
Solyc01g015130.1.1	0	0	0	0	0	0	0	0	0	0	0	0
Solyc01g015140.1.1	0	0	0	0	0	0	0	0	0	0	0	0
Solyc01g015150.1.1	0	0	0	0	0	0	0	0	0	0	0	0
Solyc01g015160.1.1	0	0	0	0	0	0	0	0	0	0	0	0
Solyc01g015170.1.1	0	0	0	0	0	0	0	0	0	0	0	0
Solyc01g015180.1.1	0	0	0	0	0	0	0	0	0	0	0	0
Solyc01g015190.1.1	0	0	0	0	0	0	0	0	0	0	0	0
Solyc01g015200.1.1	0	0	0	0	0	0	0	0	0	0	0	0
Solyc01g015210.1.1	0	0	0	0	0	0	0	0	0	0	0	0
Solyc01g015220.1.1	0	0	0	0	0	0	0	0	0	0	0	0
Solyc01g015230.1.1	0	0	0	0	0	0	0	0	0	0	0	0
Solyc01g015240.1.1	0	0	0	0	0	0	0	0	0	0	0	0
Solyc01g015250.1.1	0	0	0	0	0	0	0	0	0	0	0	0
Solyc01g015260.1.1	0	0	0	0	0	1	0	3	1	0	1	0
Solyc01g015270.1.1	0	0	0	0	0	0	0	0	0	0	0	0
Solyc01g015280.1.1	0	0	0	0	0	0	0	0	0	0	0	0
Solyc01g015290.1.1	0	0	0	0	0	0	0	0	0	0	0	0
Solyc01g015300.1.1	0	0	0	1	0	0	0	0	1	0	0	0
Solyc01g016300.1.1	0	0	0	0	0	0	0	0	0	0	0	0
Solyc01g016310.1.1	0	0	0	0	0	0	0	0	0	0	0	0
Solyc01g016320.1.1	0	0	0	0	0	0	0	0	0	0	0	0
Solyc01g016330.1.1	0	0	0	0	0	0	0	0	0	0	0	0
Solyc01g016340.1.1	0	0	0	0	0	0	0	0	0	0	0	0
Solyc01g016350.1.1	0	0	0	0	0	0	0	0	0	0	0	0
Solyc01g016360.1.1	0	0	0	0	0	0	0	0	0	0	0	0
Solyc01g016370.1.1	0	0	0	0	0	0	0	0	0	0	0	0
Solyc01g016380.2.1	1	2	2	0	0	1	2	3	0	0	1	0
Solyc01g016390.2.1	0	0	0	0	0	0	0	0	0	1	1	0
Solyc01g016400.1.1	0	4	0	0	0	0	1	0	0	3	1	1
Solyc01g016410.2.1	58	172	49	181	63	86	134	218	60	188	86	198
Solyc01g016430.1.1	0	0	0	0	0	0	0	0	0	0	0	0
Solyc01g016450.1.1	0	0	0	0	0	0	0	0	0	0	0	0
Solyc01g016460.2.1	67	238	56	192	65	110	126	266	68	197	61	176
Solyc01g016470.2.1	968	2499	561	1950	864	1316	1824	3117	894	2582	1061	3153
Solyc01g016480.1.1	0	0	0	0	0	0	0	0	0	0	0	0
Solyc01g016510.1.1	0	0	0	0	0	0	0	0	0	0	0	0
Solyc01g016520.1.1	0	0	0	0	0	0	0	0	0	0	0	0
Solyc01g016530.1.1	0	0	0	0	0	0	0	0	0	0	0	0
Solyc01g016540.1.1	0	0	0	0	0	0	1	0	0	0	1	0
Solyc01g016550.1.1	1	2	0	0	0	2	1	1	1	16	1	3
Solyc01g016560.1.1	154	345	104	409	147	275	231	455	115	400	176	413
Solyc01g016570.1.1	70	246	51	192	53	116	136	252	53	224	85	195
Solyc01g016580.1.1	0	0	0	0	0	0	0	0	0	0	0	0
Solyc01g016590.1.1	0	0	0	0	0	0	0	0	0	0	0	0
Solyc01g016600.1.1	0	0	0	0	0	0	0	0	0	1	0	0
Solyc01g016610.1.1	0	0	0	0	0	0	0	0	0	0	0	0
Solyc01g016620.1.1	0	0	0	0	0	0	0	0	0	0	0	0
Solyc01g016630.1.1	0	0	0	0	0	0	0	0	0	0	0	0
Solyc01g016640.1.1	0	0	0	0	0	0	0	0	0	0	0	0
Solyc01g016650.1.1	0	0	0	0	0	0	0	0	0	0	0	0
Solyc01g016660.1.1	0	0	0	0	0	0	0	0	0	0	0	0
Solyc01g016670.1.1	0	0	0	0	0	0	0	0	0	0	0	0
Solyc01g016680.1.1	0	0	0	0	0	0	0	0	0	0	0	0
Solyc01g016690.1.1	0	0	0	0	0	0	0	0	0	0	0	0
Solyc01g016700.2.1	0	0	0	0	0	0	0	0	0	0	0	0
Solyc01g016710.1.1	0	0	0	0	0	0	0	0	0	0	0	0
Solyc01g016720.2.1	3	15	1	17	2	1	10	19	7	19	6	8
Solyc01g016730.1.1	0	0	0	0	0	0	0	0	0	0	0	0
Solyc01g016740.1.1	0	0	0	0	0	0	0	0	0	0	0	0
Solyc01g016750.1.1	0	0	0	0	0	0	0	0	0	0	1	0
Solyc01g016760.1.1	0	0	0	0	0	0	0	2	1	0	0	0
Solyc01g016770.1.1	0	9	1	3	0	5	3	13	5	3	6	9
Solyc01g016780.1.1	3	5	0	3	5	8	6	15	1	6	3	16
Solyc01g016790.1.1	0	0	0	0	0	0	0	0	0	0	0	0
Solyc01g016800.1.1	0	0	1	0	0	0	0	0	0	0	1	0
Solyc01g016810.1.1	0	3	1	4	0	2	0	5	1	5	0	2
Solyc01g016820.1.1	0	0	0	0	0	0	0	0	0	0	0	0
Solyc01g016830.1.1	0	0	0	0	0	0	0	0	0	0	0	0
Solyc01g016840.1.1	0	0	0	0	0	0	0	0	0	0	0	0
Solyc01g016850.1.1	0	0	0	0	0	0	0	0	0	0	0	0
Solyc01g016860.1.1	0	0	0	0	0	0	0	0	0	0	0	0
Solyc01g016870.1.1	0	0	0	0	0	0	0	0	0	0	0	0
Solyc01g016880.1.1	0	0	0	0	0	0	0	0	0	0	0	0
Solyc01g016890.1.1	0	0	0	0	0	0	0	0	0	0	0	0
Solyc01g016900.1.1	0	0	0	0	0	0	0	0	0	0	0	0
Solyc01g016910.1.1	0	0	0	0	0	0	0	0	0	0	0	0
Solyc01g016920.1.1	0	0	0	0	0	0	0	0	0	0	0	0
Solyc01g016930.1.1	0	0	0	0	0	0	0	0	0	0	0	0
Solyc01g016940.1.1	0	0	0	0	0	0	0	0	0	0	0	0
Solyc01g016950.1.1	0	2	0	0	0	0	0	0	0	0	0	0
Solyc01g016960.1.1	0	0	0	0	0	0	0	0	0	0	0	0
Solyc01g016970.1.1	0	1	1	0	0	0	0	1	0	0	0	0
Solyc01g016980.1.1	0	0	0	0	0	0	0	0	0	0	0	0
Solyc01g016990.1.1	0	0	0	0	0	0	0	0	0	0	0	0
Solyc01g017000.1.1	0	0	0	0	0	0	0	0	0	0	0	0
Solyc01g017010.1.1	0	0	0	0	0	0	0	0	0	0	0	0
Solyc01g017020.1.1	0	0	0	0	0	0	0	0	0	0	0	0
Solyc01g017030.1.1	0	0	0	0	0	0	0	0	0	0	0	0
Solyc01g017040.1.1	0	0	0	0	0	0	0	0	0	0	0	0
Solyc01g017050.1.1	0	0	0	0	1	1	0	0	0	0	0	0
Solyc01g017060.1.1	0	0	0	0	0	0	0	0	0	0	0	0
Solyc01g017070.1.1	0	0	0	0	0	0	0	0	0	0	0	0
Solyc01g017080.1.1	0	0	0	0	0	0	0	0	0	0	0	0
Solyc01g017090.2.1	5	4	3	2	4	1	3	8	0	8	2	2
Solyc01g017100.1.1	1	1	1	1	1	1	2	8	0	3	1	1
Solyc01g017110.1.1	0	0	0	0	1	0	1	1	0	0	0	0
Solyc01g017120.1.1	0	0	0	0	0	0	0	0	0	0	0	0
Solyc01g017130.1.1	0	0	0	0	0	0	0	0	0	0	0	0
Solyc01g017140.1.1	0	0	0	0	0	0	0	0	0	0	0	0
Solyc01g017150.1.1	0	0	0	0	0	0	0	0	0	0	0	0
Solyc01g017160.1.1	0	0	0	0	0	0	0	0	0	0	0	0
Solyc01g017170.1.1	0	0	0	0	0	0	0	0	0	0	0	0
Solyc01g017180.1.1	0	0	0	0	0	0	0	0	0	0	0	0
Solyc01g017190.1.1	0	0	0	0	0	0	0	0	0	0	0	0
Solyc01g017200.1.1	0	0	0	0	0	0	0	0	0	0	0	0
Solyc01g017210.1.1	0	0	0	0	0	0	0	0	0	0	0	0
Solyc01g017220.1.1	0	0	1	0	0	0	0	0	0	0	0	0
Solyc01g017230.1.1	0	0	2	2	0	1	0	2	0	0	0	2
Solyc01g017240.1.1	1	1	0	2	1	0	1	2	2	2	0	1
Solyc01g017250.1.1	0	0	0	0	0	0	0	0	0	0	0	1
Solyc01g017260.1.1	0	0	0	0	0	0	0	0	0	0	0	0
Solyc01g017270.1.1	0	0	0	0	0	0	0	0	0	0	0	0
Solyc01g017280.1.1	0	0	0	0	0	0	0	0	0	0	0	0
Solyc01g017290.1.1	0	0	0	0	0	0	0	0	0	0	0	0
Solyc01g017300.1.1	0	1	0	0	0	0	0	0	0	0	1	0
Solyc01g017310.1.1	0	0	0	0	0	0	0	0	0	0	0	0
Solyc01g017320.1.1	3	0	0	5	0	0	1	2	1	0	0	4
Solyc01g017330.1.1	4	24	0	12	6	9	7	15	2	17	3	10
Solyc01g017340.1.1	0	0	0	0	0	1	0	0	0	2	0	1
Solyc01g017350.1.1	0	0	0	0	0	0	0	2	0	1	0	0
Solyc01g017360.1.1	0	1	0	0	0	0	0	6	0	0	0	0
Solyc01g017370.1.1	0	0	0	0	0	0	4	2	0	1	2	1
Solyc01g017380.1.1	1	0	0	0	0	0	2	1	0	3	0	1
Solyc01g017390.1.1	0	0	0	0	0	0	0	0	0	0	0	0
Solyc01g017400.1.1	0	2	0	1	1	0	1	2	0	3	0	0
Solyc01g017410.1.1	0	0	0	0	0	0	0	0	0	0	0	0
Solyc01g017420.1.1	2	0	0	1	0	2	0	0	0	0	0	0
Solyc01g017430.1.1	0	0	0	0	0	0	0	0	0	0	0	0
Solyc01g017440.1.1	0	0	0	0	0	0	0	0	0	0	0	0
Solyc01g017450.1.1	0	0	0	0	0	0	0	0	0	0	0	0
Solyc01g017460.1.1	0	0	0	0	0	0	0	1	0	1	1	0
Solyc01g017470.1.1	0	0	0	0	0	1	1	0	0	0	0	0
Solyc01g017480.1.1	0	0	0	0	2	0	1	1	0	0	0	0
Solyc01g017490.1.1	27	106	8	83	11	46	49	42	18	98	18	20
Solyc01g017500.1.1	0	0	0	0	0	0	0	0	0	0	0	0
Solyc01g017510.1.1	0	0	0	0	0	0	0	0	0	0	0	0
Solyc01g017520.1.1	0	1	0	0	1	0	1	0	0	2	1	2
Solyc01g017530.1.1	1	12	0	5	1	1	4	3	0	5	2	3
Solyc01g017540.1.1	0	0	0	0	0	0	0	0	0	0	0	0
Solyc01g017550.1.1	0	1	0	1	1	2	1	3	0	1	2	0
Solyc01g017560.1.1	1	2	1	0	2	0	1	0	0	1	0	0
Solyc01g017570.1.1	0	0	0	0	0	0	0	0	0	1	0	0
Solyc01g017580.1.1	0	0	0	0	0	0	0	0	0	0	0	0
Solyc01g017590.1.1	7	24	14	20	2	12	14	22	7	32	2	14
Solyc01g017600.2.1	0	0	2	1	1	1	0	1	0	1	4	7
Solyc01g017610.1.1	0	0	0	0	0	0	0	0	0	0	0	0
Solyc01g017620.1.1	0	0	0	0	0	0	0	0	0	0	0	0
Solyc01g017630.1.1	0	0	0	0	0	0	0	0	0	0	0	0
Solyc01g017640.1.1	0	0	0	0	0	0	0	0	0	0	0	0
Solyc01g017650.1.1	0	0	0	0	0	0	0	0	0	0	0	0
Solyc01g017660.1.1	0	0	0	0	0	0	0	0	0	0	0	0
Solyc01g017670.1.1	0	0	0	0	0	0	0	0	0	0	0	0
Solyc01g017680.1.1	0	0	0	0	0	0	0	0	0	0	0	0
Solyc01g017690.1.1	0	0	0	0	0	0	0	0	0	0	0	0
Solyc01g017700.1.1	0	0	0	0	0	0	0	0	0	0	0	0
Solyc01g017710.1.1	0	4	1	1	1	0	2	3	0	2	1	3
Solyc01g017720.1.1	7	14	3	13	2	2	3	12	3	12	0	11
Solyc01g017730.1.1	8	12	5	7	4	1	3	29	4	12	6	11
Solyc01g017740.1.1	13	14	6	12	4	3	11	20	10	19	9	19
Solyc01g017750.1.1	0	0	0	0	0	0	0	0	0	0	0	0
Solyc01g017760.1.1	0	0	0	0	0	0	0	0	0	0	0	0
Solyc01g017770.1.1	0	0	0	0	0	0	0	0	0	0	0	0
Solyc01g017780.1.1	0	0	0	0	0	0	0	0	0	0	0	0
Solyc01g017790.1.1	0	0	0	0	0	0	0	0	0	0	0	0
Solyc01g017800.1.1	0	0	0	0	0	0	0	0	0	0	0	0
Solyc01g017810.1.1	0	0	0	0	0	0	0	0	0	0	0	0
Solyc01g017820.1.1	0	0	0	0	0	0	0	0	0	0	0	0
Solyc01g017830.1.1	0	0	0	0	0	0	0	0	0	0	0	0
Solyc01g017840.1.1	0	0	0	0	0	0	0	0	0	0	0	0
Solyc01g017850.1.1	0	0	0	0	0	0	0	0	0	0	0	0
Solyc01g017860.2.1	14	31	16	35	8	18	22	44	13	33	11	32
Solyc01g017870.1.1	0	0	0	0	0	1	0	0	0	0	0	1
Solyc01g017880.1.1	0	0	0	0	0	0	0	0	0	0	0	0
Solyc01g017890.1.1	0	0	0	0	0	0	0	0	0	0	0	0
Solyc01g017900.1.1	0	0	0	0	0	0	0	0	0	0	0	0
Solyc01g017910.1.1	0	0	0	0	0	0	0	0	0	0	0	0
Solyc01g017920.1.1	0	0	0	0	0	0	0	0	0	0	0	0
Solyc01g017930.1.1	0	0	0	0	0	0	0	0	0	0	0	0
Solyc01g017940.1.1	0	0	0	0	0	0	0	0	0	0	0	0
Solyc01g017950.1.1	0	0	0	0	0	0	0	0	0	0	0	0
Solyc01g017960.1.1	0	0	0	0	0	0	0	0	0	0	0	0
Solyc01g017970.1.1	0	0	0	0	0	0	0	0	0	0	0	0
Solyc01g017980.1.1	0	0	0	0	0	0	0	0	0	0	0	0
Solyc01g017990.1.1	0	0	0	0	0	0	0	0	0	0	0	0
Solyc01g018000.1.1	0	0	0	0	0	0	0	0	0	0	0	0
Solyc01g018010.1.1	11	34	13	15	10	15	15	29	12	28	12	24
Solyc01g018020.1.1	2	8	2	4	0	2	6	9	2	2	2	2
Solyc01g018040.1.1	0	0	0	0	0	0	0	0	0	0	0	0
Solyc01g018050.1.1	0	0	0	0	0	0	0	0	0	0	0	0
Solyc01g018060.1.1	0	0	0	0	0	0	0	0	0	0	0	0
Solyc01g018070.1.1	0	0	0	0	0	0	0	0	0	0	0	0
Solyc01g018080.1.1	0	0	0	0	0	0	0	0	0	0	0	0
Solyc01g018090.1.1	0	0	0	0	1	0	0	0	1	1	0	0
Solyc01g018100.1.1	0	0	0	0	0	0	0	0	0	0	0	0
Solyc01g019100.1.1	0	0	0	0	0	0	0	0	0	0	0	0
Solyc01g020100.1.1	0	0	0	0	0	0	0	0	0	0	0	0
Solyc01g020110.1.1	0	0	0	0	0	0	0	0	0	0	0	0
Solyc01g020120.1.1	0	0	0	0	0	0	0	0	0	0	0	0
Solyc01g020130.2.1	2	4	2	12	11	4	12	26	12	56	19	36
Solyc01g020140.2.1	3	3	1	5	1	7	5	12	1	33	11	16
Solyc01g020150.2.1	9	18	0	11	7	1	12	15	7	76	43	44
Solyc01g020160.1.1	2	1	0	0	0	0	6	8	3	23	8	18
Solyc01g020170.1.1	0	0	0	0	0	0	0	0	0	0	0	0
Solyc01g020180.1.1	0	0	0	0	0	0	0	0	0	0	0	0
Solyc01g020190.2.1	1	2	0	1	0	1	0	0	1	6	1	1
Solyc01g020200.1.1	5	10	7	3	8	3	2	38	2	25	2	14
Solyc01g020210.1.1	0	0	0	0	0	0	0	0	0	0	0	0
Solyc01g020220.1.1	33	96	20	109	19	53	58	121	20	125	50	80
Solyc01g020230.2.1	12	35	10	13	6	12	9	34	3	33	10	20
Solyc01g020240.2.1	452	1196	295	1128	319	601	729	1385	372	1338	456	1208
Solyc01g020250.1.1	0	0	0	0	0	0	0	0	0	0	0	0
Solyc01g020260.1.1	0	0	0	0	0	0	0	0	0	0	0	0
Solyc01g020270.1.1	0	0	0	0	0	0	0	0	0	0	0	0
Solyc01g020280.1.1	0	0	0	0	0	0	0	0	0	0	0	0
Solyc01g020290.1.1	0	0	0	0	0	0	0	1	0	0	0	0
Solyc01g020300.2.1	0	0	0	0	0	0	0	0	0	0	0	0
Solyc01g020310.1.1	0	0	0	0	0	0	0	0	0	0	0	0
Solyc01g020320.2.1	28	69	17	69	23	27	36	99	14	68	22	75
Solyc01g020330.2.1	30	89	25	81	32	49	50	75	32	60	52	76
Solyc01g020340.1.1	29	82	14	61	9	35	39	77	25	55	37	59
Solyc01g020350.1.1	0	0	0	0	2	0	0	0	0	1	0	2
Solyc01g020360.1.1	0	0	0	0	0	0	0	0	0	0	0	0
Solyc01g020370.1.1	0	0	0	0	0	0	0	0	0	0	0	0
Solyc01g020380.1.1	0	0	0	0	0	0	0	0	0	0	0	0
Solyc01g020390.1.1	0	0	0	0	0	0	0	0	0	0	0	0
Solyc01g020400.1.1	0	0	0	0	0	0	0	0	0	0	0	0
Solyc01g020410.1.1	0	0	0	0	0	0	0	0	0	0	0	0
Solyc01g020430.1.1	0	0	0	0	0	0	0	0	0	0	0	0
Solyc01g020440.2.1	552	1372	257	1003	322	552	709	1447	409	1668	507	1328
Solyc01g020450.1.1	0	0	0	0	0	0	0	0	0	0	0	0
Solyc01g020460.1.1	0	0	0	0	0	0	0	0	0	0	0	0
Solyc01g020470.1.1	0	0	0	0	0	0	0	0	0	0	0	0
Solyc01g020480.1.1	0	0	0	0	0	0	0	0	0	0	0	0
Solyc01g020490.1.1	0	0	0	0	0	0	0	0	0	0	0	0
Solyc01g020500.1.1	12	37	7	18	6	16	16	55	6	39	18	28
Solyc01g020510.1.1	0	0	0	0	0	0	0	0	0	0	0	0
Solyc01g020520.2.1	52	199	42	158	44	98	102	196	47	219	66	166
Solyc01g020530.1.1	0	0	0	0	0	0	0	0	0	0	0	0
Solyc01g020550.1.1	0	0	0	0	0	0	0	0	0	0	0	0
Solyc01g020560.1.1	0	0	0	0	0	0	0	0	0	0	0	0
Solyc01g020570.1.1	0	0	0	0	0	0	0	0	0	0	0	0
Solyc01g020580.1.1	0	0	0	0	0	0	0	0	0	0	0	0
Solyc01g020590.1.1	0	0	0	0	0	0	0	0	0	0	0	0
Solyc01g020600.1.1	0	0	0	0	0	0	0	0	0	0	0	0
Solyc01g021600.2.1	0	1	0	0	0	0	0	0	0	3	0	3
Solyc01g021610.1.1	0	0	0	0	0	0	0	0	0	0	0	0
Solyc01g021620.1.1	0	0	0	0	0	0	0	0	0	0	0	0
Solyc01g021630.1.1	0	0	0	0	0	0	0	0	0	0	0	0
Solyc01g021640.2.1	174	526	93	412	154	200	285	595	177	672	212	515
Solyc01g021650.1.1	0	0	0	0	0	0	0	0	0	0	0	0
Solyc01g021660.1.1	0	0	0	0	0	0	0	0	0	0	0	0
Solyc01g021670.2.1	114	331	51	238	81	126	192	365	130	361	153	325
Solyc01g021680.1.1	0	0	0	0	0	0	0	0	0	1	0	0
Solyc01g021690.1.1	0	0	0	0	0	0	0	0	0	0	0	0
Solyc01g021700.1.1	0	0	0	0	0	0	0	0	0	0	0	0
Solyc01g021710.1.1	0	0	0	0	0	0	0	0	0	0	0	0
Solyc01g021720.1.1	7	23	5	36	16	9	10	30	8	11	12	19
Solyc01g021730.2.1	0	5	1	6	5	4	1	0	0	6	4	7
Solyc01g021740.1.1	26	36	9	57	17	25	22	49	19	77	13	45
Solyc01g022740.2.1	159	524	103	498	164	275	318	619	153	559	174	527
Solyc01g022750.2.1	650	1547	383	1348	647	932	1165	1800	602	1800	823	1828
Solyc01g022760.1.1	0	0	0	0	0	0	0	0	0	0	0	0
Solyc01g022770.1.1	0	0	0	0	0	0	0	0	0	0	0	0
Solyc01g022780.1.1	0	2	1	1	0	3	1	0	0	0	1	0
Solyc01g022790.1.1	0	0	0	0	0	0	0	0	0	0	0	0
Solyc01g028800.1.1	12	23	4	19	8	17	13	33	15	45	14	41
Solyc01g028810.2.1	11409	31305	6106	28241	9744	17874	18879	33772	8895	31417	11699	30746
Solyc01g028830.2.1	182	447	91	397	123	186	365	739	207	735	272	729
Solyc01g028840.1.1	0	0	0	0	0	0	0	0	0	0	0	0
Solyc01g028850.1.1	0	0	0	0	0	0	0	0	0	0	0	0
Solyc01g028860.2.1	7265	21051	4513	20373	6841	11138	12617	25018	7336	28860	9284	24392
Solyc01g028870.2.1	243	709	180	597	227	326	409	896	236	957	256	662
Solyc01g028880.1.1	0	0	0	0	0	0	0	0	0	0	0	0
Solyc01g028890.1.1	0	0	0	0	0	0	0	0	0	0	0	0
Solyc01g028900.2.1	492	1325	354	1380	497	717	830	1652	479	1976	642	1780
Solyc01g028910.1.1	0	0	0	0	0	0	0	0	0	0	0	0
Solyc01g028920.1.1	0	0	0	0	0	0	0	0	0	0	0	0
Solyc01g028930.2.1	173	566	122	429	147	251	308	777	167	696	194	576
Solyc01g028940.1.1	0	0	0	0	0	0	0	0	0	0	0	0
Solyc01g028950.1.1	0	0	0	0	0	0	0	0	0	0	0	0
Solyc01g028960.1.1	0	0	0	0	0	0	0	0	0	0	0	0
Solyc01g028970.1.1	0	0	0	0	0	0	0	0	0	0	0	0
Solyc01g028980.1.1	0	0	0	0	0	0	0	0	0	0	0	0
Solyc01g033980.2.1	41	106	28	107	40	75	69	146	30	155	47	158
Solyc01g033990.1.1	0	0	0	0	0	0	0	0	0	0	0	0
Solyc01g034000.1.1	0	0	0	0	0	0	0	0	0	0	0	0
Solyc01g034010.1.1	0	0	0	0	0	0	0	0	0	0	0	0
Solyc01g034020.2.1	1009	2791	580	2245	777	1362	1628	3085	835	3170	960	2706
Solyc01g034030.1.1	0	0	0	0	0	0	0	0	0	0	0	0
Solyc01g034040.1.1	0	1	0	0	0	0	0	0	0	1	0	1
Solyc01g034050.1.1	0	0	0	0	0	0	0	0	0	0	0	0
Solyc01g034060.1.1	0	0	0	0	0	0	0	0	0	0	0	0
Solyc01g034070.1.1	0	0	0	0	0	0	0	0	0	0	0	0
Solyc01g034080.1.1	7	27	5	34	9	31	27	63	15	55	15	68
Solyc01g034090.1.1	0	0	0	0	0	0	0	0	0	0	0	0
Solyc01g034100.1.1	0	0	0	0	0	0	0	0	0	0	0	0
Solyc01g034110.1.1	0	0	0	0	0	0	0	0	0	0	0	0
Solyc01g034120.2.1	0	0	0	0	0	0	0	0	0	0	0	0
Solyc01g034130.1.1	0	0	0	0	0	0	0	0	0	0	0	0
Solyc01g034140.1.1	0	0	0	0	0	0	0	0	0	0	0	0
Solyc01g034150.2.1	236	810	206	806	231	407	461	1034	242	953	343	724
Solyc01g034160.1.1	0	0	0	0	0	0	0	0	0	0	0	0
Solyc01g034170.1.1	0	0	0	0	0	0	0	0	0	0	0	0
Solyc01g034180.1.1	0	0	0	2	1	2	3	0	0	0	0	0
Solyc01g034190.1.1	0	0	0	0	0	0	0	0	0	0	0	0
Solyc01g034200.1.1	0	0	0	0	0	0	0	0	0	0	0	0
Solyc01g034210.1.1	0	0	0	0	0	0	0	0	0	0	0	0
Solyc01g034220.1.1	0	2	0	1	0	1	3	0	0	0	0	0
Solyc01g035220.1.1	0	0	0	0	0	0	0	0	0	0	0	0
Solyc01g038220.1.1	0	0	0	0	0	0	0	0	0	0	0	0
[truncated: 32,726 more rows]

## Sheet: S. peruvianum
geneid	MVM1	MVM2	LVM1	LVM2	TM1	TM2	FM1	FM2	SIM1	SIM2
Solyc00g005000.2.1	1	1	0	1	0	0	0	0	0	1
Solyc00g005020.1.1	0	0	0	0	0	0	0	0	0	0
Solyc00g005040.2.1	1	0	0	2	0	1	0	0	2	0
Solyc00g005050.2.1	734	769	571	574	657	651	470	529	624	679
Solyc00g005060.1.1	0	0	0	0	0	0	0	0	0	0
Solyc00g005070.1.1	0	0	0	0	0	0	0	0	0	0
Solyc00g005080.1.1	0	0	0	0	0	0	0	0	0	0
Solyc00g005090.1.1	0	0	0	0	0	0	0	0	0	0
Solyc00g005100.1.1	0	0	0	0	0	0	0	0	0	0
Solyc00g005110.1.1	0	0	0	0	0	0	0	0	0	1
Solyc00g005120.1.1	0	0	0	0	0	0	0	0	0	0
Solyc00g005130.1.1	0	0	0	0	0	0	0	0	0	0
Solyc00g005140.1.1	0	0	0	0	1	0	0	0	0	0
Solyc00g005150.1.1	0	0	1	1	1	0	0	0	1	1
Solyc00g005160.1.1	0	0	0	0	0	0	0	0	0	0
Solyc00g005170.1.1	0	0	0	0	0	0	0	0	0	0
Solyc00g005180.1.1	7	2	0	4	3	0	0	1	1	0
Solyc00g005280.1.1	0	0	0	0	0	0	0	0	0	0
Solyc00g005420.1.1	0	0	0	0	0	0	0	0	0	0
Solyc00g005430.1.1	1	2	0	3	1	1	0	0	0	0
Solyc00g005440.1.1	112	125	125	142	33	40	41	52	109	85
Solyc00g005450.1.1	0	0	0	0	0	0	0	0	0	0
Solyc00g005460.1.1	2	3	1	0	3	1	0	2	5	4
Solyc00g005470.1.1	0	0	0	0	0	0	0	0	0	0
Solyc00g005480.1.1	0	0	0	0	0	0	0	0	0	0
Solyc00g005490.1.1	0	0	0	0	0	0	0	0	0	0
Solyc00g005840.2.1	448	413	374	405	324	324	266	295	386	345
Solyc00g005850.1.1	0	0	0	0	0	0	0	0	1	2
Solyc00g005860.1.1	0	1	0	0	2	0	0	0	1	0
Solyc00g005870.1.1	3	0	3	1	0	1	0	1	0	0
Solyc00g005880.1.1	1	0	1	0	0	0	0	0	1	1
Solyc00g005890.2.1	0	0	0	0	0	0	0	0	0	0
Solyc00g005900.1.1	0	0	0	0	0	0	0	0	0	0
Solyc00g005980.1.1	0	0	0	0	0	0	0	0	0	0
Solyc00g006010.1.1	0	0	0	0	0	0	0	0	0	0
Solyc00g006020.1.1	0	0	0	0	0	0	0	0	0	0
Solyc00g006050.1.1	0	0	0	1	0	2	1	0	0	0
Solyc00g006090.1.1	0	0	0	0	0	0	0	0	0	0
Solyc00g006170.1.1	0	0	0	0	0	0	0	0	0	0
Solyc00g006250.1.1	0	0	0	0	0	0	0	0	0	0
Solyc00g006470.1.1	4408	4590	2247	2618	1958	2034	1984	2184	4337	4454
Solyc00g006480.1.1	0	0	0	0	0	0	0	0	0	0
Solyc00g006490.2.1	2083	2093	1873	1859	1933	1896	1173	1272	1557	1571
Solyc00g006500.1.1	0	0	0	0	0	0	0	0	0	0
Solyc00g006510.1.1	0	0	0	0	0	0	0	0	0	0
Solyc00g006520.1.1	0	0	0	0	0	0	0	0	0	0
Solyc00g006530.1.1	0	0	0	0	0	0	0	0	0	0
Solyc00g006540.1.1	0	0	0	0	0	0	0	0	0	0
Solyc00g006550.1.1	0	0	0	0	0	0	0	0	0	0
Solyc00g006560.1.1	0	0	0	0	0	0	0	0	0	0
Solyc00g006570.1.1	6	3	6	5	6	6	4	4	3	3
Solyc00g006590.1.1	0	0	0	0	0	0	0	0	0	0
Solyc00g006600.1.1	0	0	0	1	0	0	0	0	0	0
Solyc00g006630.1.1	0	0	0	0	0	0	0	0	0	0
Solyc00g006650.1.1	0	0	0	0	0	0	0	0	0	0
Solyc00g006660.1.1	0	0	0	0	0	0	0	0	0	0
Solyc00g006670.2.1	1	1	1	0	0	4	1	1	1	1
Solyc00g006680.1.1	8	20	10	11	6	9	7	12	17	15
Solyc00g006690.2.1	4259	4839	2628	2545	1367	1259	1690	1780	3828	4314
Solyc00g006700.1.1	0	0	0	0	0	0	0	0	0	0
Solyc00g006800.2.1	3520	3607	3122	3287	2669	2774	2151	2434	2944	3006
Solyc00g006810.2.1	251	251	217	231	176	194	156	165	219	206
Solyc00g006820.2.1	1481	1580	1256	1282	907	880	711	772	833	838
Solyc00g006830.2.1	1867	1993	1676	1780	1704	1624	1170	1378	1652	1607
Solyc00g006840.2.1	0	0	0	0	0	0	0	0	0	0
Solyc00g006850.1.1	0	0	0	0	0	0	0	0	0	0
Solyc00g006860.1.1	0	0	0	0	0	0	0	0	0	0
Solyc00g006870.1.1	0	0	0	0	0	0	0	0	0	0
Solyc00g006880.1.1	0	0	0	0	0	0	0	0	0	0
Solyc00g006890.1.1	0	0	0	0	0	0	0	0	0	0
Solyc00g006900.1.1	1	1	1	1	1	0	0	0	2	0
Solyc00g007000.1.1	13	9	7	5	9	7	1	0	1	3
Solyc00g007010.2.1	757	860	662	722	528	535	499	579	697	665
Solyc00g007020.1.1	0	0	0	0	0	0	0	0	0	0
Solyc00g007030.1.1	1	0	0	0	0	0	0	0	0	0
Solyc00g007040.1.1	0	0	0	0	0	0	0	0	0	0
Solyc00g007050.1.1	0	0	0	0	0	0	0	0	0	0
Solyc00g007060.2.1	381	448	356	351	324	294	172	210	240	222
Solyc00g007070.2.1	3319	3505	2952	2877	2751	2741	1913	2090	2675	2759
Solyc00g007080.2.1	245	232	224	222	220	189	177	214	268	274
Solyc00g007090.2.1	308	295	256	276	272	259	190	217	307	298
Solyc00g007100.2.1	404	388	358	353	299	290	286	297	406	414
Solyc00g007110.2.1	242	226	213	231	197	228	111	168	198	221
Solyc00g007120.2.1	589	558	553	595	511	518	400	423	541	544
Solyc00g007130.2.1	36	37	38	32	27	30	23	25	32	25
Solyc00g007140.1.1	0	0	0	0	0	0	0	0	0	0
Solyc00g007150.2.1	0	0	0	0	0	0	0	0	0	0
Solyc00g007160.1.1	0	0	0	0	0	0	0	0	0	0
Solyc00g007170.1.1	0	0	0	0	0	0	0	0	0	0
Solyc00g007180.1.1	0	0	0	0	0	0	0	0	0	0
Solyc00g007190.2.1	52	32	38	43	40	31	31	35	25	30
Solyc00g007200.2.1	674	689	620	593	521	541	302	339	437	410
Solyc00g007210.1.1	0	0	0	0	0	0	0	0	0	0
Solyc00g007220.2.1	134	129	142	140	158	170	118	136	144	141
Solyc00g007230.1.1	0	0	1	0	0	0	1	0	0	0
Solyc00g007240.1.1	0	0	0	0	0	0	0	0	0	0
Solyc00g007250.1.1	0	1	1	0	0	0	0	0	0	0
Solyc00g007260.2.1	5765	6140	4657	4820	4575	4469	2059	2415	3189	3159
Solyc00g007270.2.1	1926	1921	1649	1647	1218	1191	1313	1463	1989	1972
Solyc00g007290.1.1	0	0	0	0	0	0	0	0	0	0
Solyc00g007300.2.1	188	209	194	222	148	132	113	135	141	141
Solyc00g007310.1.1	0	0	0	0	0	0	0	0	0	0
Solyc00g007320.1.1	0	0	0	0	0	0	0	0	0	0
Solyc00g007330.1.1	0	0	0	0	0	0	0	0	0	0
Solyc00g007340.1.1	0	0	0	0	0	0	0	0	0	0
Solyc00g007350.1.1	0	0	0	0	0	0	0	0	0	0
Solyc00g007450.1.1	0	0	0	0	0	0	0	0	0	0
Solyc00g007550.1.1	0	0	0	0	0	0	0	0	0	0
Solyc00g007560.1.1	0	0	0	0	0	0	0	0	0	0
Solyc00g007570.1.1	0	0	0	0	0	0	0	0	0	0
Solyc00g007580.1.1	0	0	0	0	0	0	0	0	0	0
Solyc00g007590.1.1	0	0	0	0	0	0	0	0	0	0
Solyc00g007600.1.1	1	2	0	1	2	0	1	0	1	2
Solyc00g007610.1.1	0	0	0	0	0	0	0	0	0	0
Solyc00g007910.1.1	1	0	0	0	0	0	0	0	0	0
Solyc00g007920.1.1	0	0	0	0	0	0	0	0	0	0
Solyc00g007930.1.1	0	0	0	0	0	0	0	0	0	0
Solyc00g007940.1.1	0	0	0	0	0	0	0	0	0	0
Solyc00g007950.1.1	0	0	0	0	0	0	0	0	0	0
Solyc00g007960.1.1	0	0	0	0	0	0	0	0	0	0
Solyc00g007970.1.1	0	0	0	0	0	0	0	0	0	0
Solyc00g007980.1.1	0	0	0	0	0	0	0	0	0	0
Solyc00g007990.1.1	0	0	0	0	0	0	0	0	0	0
Solyc00g008000.1.1	0	0	0	0	0	0	0	0	0	0
Solyc00g008010.1.1	0	0	0	0	0	0	0	0	0	0
Solyc00g008020.1.1	0	0	0	0	0	0	0	0	0	0
Solyc00g008030.1.1	0	0	0	0	0	0	0	0	0	0
Solyc00g008040.1.1	0	0	0	0	0	0	0	0	0	0
Solyc00g008050.1.1	0	0	0	0	0	0	0	0	0	0
Solyc00g008060.1.1	0	0	0	0	0	0	0	0	0	0
Solyc00g008070.1.1	0	0	0	0	0	0	0	0	0	0
Solyc00g008080.1.1	0	0	0	0	0	0	0	0	0	0
Solyc00g008090.1.1	0	0	0	0	0	0	0	0	0	0
Solyc00g008100.1.1	0	0	0	0	0	0	0	0	0	0
Solyc00g008110.1.1	0	0	0	0	0	0	0	0	0	0
Solyc00g008120.1.1	0	0	0	0	0	0	0	0	0	0
Solyc00g008130.1.1	0	0	0	0	0	0	0	0	0	0
Solyc00g008140.1.1	0	0	0	0	0	0	0	0	0	0
Solyc00g008150.1.1	0	0	0	0	0	0	0	0	0	0
Solyc00g008160.1.1	0	0	0	0	0	0	0	0	0	0
Solyc00g008260.1.1	0	0	0	0	0	0	0	0	0	0
Solyc00g008270.1.1	0	0	0	0	0	0	0	0	0	0
Solyc00g008570.2.1	242	317	156	171	58	40	96	125	193	172
Solyc00g008580.1.1	231	234	109	141	848	874	440	515	1040	1137
Solyc00g008680.2.1	3004	3111	2460	2612	1748	1821	1656	1867	2259	2212
Solyc00g008690.1.1	0	0	1	0	1	0	0	0	0	0
Solyc00g008800.1.1	0	0	0	0	0	0	0	0	0	0
Solyc00g008900.1.1	0	0	0	0	0	0	0	0	0	0
Solyc00g008910.1.1	0	0	0	0	0	0	0	0	0	0
Solyc00g008920.1.1	0	0	0	0	0	0	0	0	0	0
Solyc00g009020.2.1	3963	4104	2955	3002	2552	2566	2704	3038	3827	3822
Solyc00g009030.1.1	16	19	18	14	13	13	11	11	23	15
Solyc00g009040.2.1	96	99	90	111	99	134	100	116	168	180
Solyc00g009050.1.1	394	391	366	374	313	334	283	323	355	357
Solyc00g009060.2.1	283	291	149	153	146	134	78	121	130	133
Solyc00g009070.1.1	0	0	0	0	0	0	0	1	0	1
Solyc00g009080.2.1	245	279	198	217	162	133	158	179	238	254
Solyc00g009090.2.1	1087	1184	887	895	819	773	531	556	814	822
Solyc00g009100.2.1	277	266	258	221	175	212	152	207	212	225
Solyc00g009110.2.1	295	301	326	337	784	819	169	170	179	164
Solyc00g009120.2.1	81	83	51	59	44	37	29	23	32	46
Solyc00g009130.2.1	40	51	37	37	22	33	23	26	20	22
Solyc00g009140.2.1	66	75	67	81	53	39	34	46	33	44
Solyc00g009240.1.1	0	0	0	0	0	0	0	0	0	0
Solyc00g009440.1.1	0	0	0	0	0	0	0	0	0	0
Solyc00g009540.1.1	0	1	0	1	2	1	0	1	1	0
Solyc00g009650.1.1	0	0	0	0	0	0	0	0	0	0
Solyc00g009660.1.1	0	0	0	0	0	0	0	0	0	0
Solyc00g009760.2.1	689	825	413	581	237	243	303	280	830	846
Solyc00g009770.1.1	0	0	0	0	0	0	1	1	0	2
Solyc00g009780.1.1	21	22	22	14	21	46	28	39	38	43
Solyc00g009790.1.1	0	0	0	0	0	0	0	0	0	0
Solyc00g009800.1.1	31	37	25	34	14	50	25	53	47	54
Solyc00g010100.1.1	0	0	0	0	0	0	0	0	0	0
Solyc00g010110.1.1	0	0	0	0	0	0	0	0	0	0
Solyc00g010210.1.1	0	0	0	0	0	0	0	0	0	0
Solyc00g010410.1.1	0	0	0	0	0	0	0	0	0	0
Solyc00g010420.1.1	0	0	0	0	0	0	0	0	0	0
Solyc00g010520.1.1	0	0	0	0	0	0	0	0	0	0
Solyc00g010530.1.1	60	66	17	16	39	29	23	27	37	29
Solyc00g010540.1.1	0	0	0	0	0	0	0	0	0	0
Solyc00g010550.1.1	11	17	14	7	9	11	10	8	15	11
Solyc00g010750.1.1	0	0	0	1	0	0	0	0	0	0
Solyc00g010760.1.1	0	0	0	0	0	0	0	0	0	0
Solyc00g010770.1.1	0	0	0	0	0	0	1	0	0	0
Solyc00g010780.1.1	0	0	0	0	0	0	0	0	0	0
Solyc00g010790.1.1	0	0	0	0	0	0	0	0	0	0
Solyc00g010810.1.1	0	0	0	0	0	0	0	0	0	0
Solyc00g010930.1.1	0	0	0	0	0	0	0	0	0	0
Solyc00g011130.1.1	0	0	0	0	0	0	0	0	0	0
Solyc00g011140.1.1	0	0	0	0	0	0	0	0	0	0
Solyc00g011150.1.1	1601	1619	714	846	598	619	613	680	1260	1286
Solyc00g011160.1.1	115	128	62	62	95	118	71	68	227	166
Solyc00g011170.1.1	4	2	1	6	2	1	9	2	3	1
Solyc00g011180.1.1	0	0	0	0	0	0	0	0	0	0
Solyc00g011310.1.1	0	0	0	0	0	0	0	0	0	0
Solyc00g011550.1.1	0	0	0	0	0	0	0	0	0	0
Solyc00g011560.1.1	0	0	0	0	0	0	0	0	0	0
Solyc00g011660.1.1	0	0	0	0	0	0	0	0	0	0
Solyc00g011670.1.1	0	0	0	0	0	0	0	0	0	0
Solyc00g011870.1.1	0	0	0	0	0	0	0	0	0	0
Solyc00g011880.2.1	124	111	108	105	92	74	79	96	100	115
Solyc00g011890.2.1	1809	1815	1573	1706	1782	1870	1285	1565	1733	1703
Solyc00g012090.1.1	0	0	0	0	0	0	0	0	0	0
Solyc00g012310.1.1	0	0	0	0	0	0	0	0	0	0
Solyc00g012430.1.1	21	16	6	2	20	17	13	13	13	25
Solyc00g012440.1.1	93	111	51	49	39	51	29	31	93	91
Solyc00g012540.1.1	0	0	0	0	0	0	0	0	0	0
Solyc00g012640.1.1	0	0	0	0	0	0	0	0	0	0
Solyc00g012650.1.1	0	0	0	0	0	0	0	0	0	0
Solyc00g012660.1.1	0	0	0	0	0	0	0	0	0	0
Solyc00g012670.1.1	0	0	0	0	0	0	0	0	0	0
Solyc00g012680.1.1	0	0	0	0	0	0	0	0	0	0
Solyc00g012690.1.1	0	0	0	0	0	0	0	0	0	0
Solyc00g012700.1.1	0	0	0	0	0	0	0	0	0	0
Solyc00g012800.1.1	0	0	0	0	0	0	0	0	0	0
Solyc00g012900.1.1	0	0	0	0	0	0	0	0	0	0
Solyc00g013000.1.1	0	0	0	0	0	0	0	0	0	0
Solyc00g013100.1.1	1	2	0	0	4	0	0	0	3	2
Solyc00g013110.1.1	2	3	1	3	1	1	4	1	4	2
Solyc00g013120.2.1	71	71	54	81	63	55	57	63	69	64
Solyc00g013130.2.1	2	0	0	0	0	0	0	0	0	0
Solyc00g013140.1.1	165	156	116	136	137	139	101	114	147	159
Solyc00g013150.1.1	27	24	10	18	19	10	16	12	12	15
Solyc00g013160.1.1	44	56	62	70	69	64	49	77	59	82
Solyc00g013170.1.1	38	70	77	80	44	69	50	58	57	52
Solyc00g013180.1.1	23	12	12	11	20	11	11	21	25	20
Solyc00g013190.1.1	8	1	9	7	7	8	6	10	8	11
Solyc00g013320.1.1	0	0	0	0	0	0	0	0	0	0
Solyc00g013330.1.1	0	0	0	0	0	0	0	0	0	0
Solyc00g013770.1.1	0	0	0	0	0	0	0	0	0	0
Solyc00g014170.1.1	0	0	0	0	0	0	0	0	0	0
Solyc00g014180.1.1	0	0	0	0	0	0	0	0	0	0
Solyc00g014190.1.1	0	0	0	0	0	0	0	0	0	0
Solyc00g014290.1.1	0	0	0	0	0	0	0	0	0	0
Solyc00g014390.1.1	0	0	0	0	0	0	0	0	0	0
Solyc00g014790.2.1	17	16	9	10	10	9	7	8	18	15
Solyc00g014800.1.1	13	13	10	8	8	8	12	19	9	16
Solyc00g014810.1.1	11	14	9	7	6	11	8	13	12	14
Solyc00g014820.2.1	27	26	23	23	15	18	16	19	24	18
Solyc00g014830.2.1	27	53	34	36	42	43	28	31	56	52
Solyc00g014840.1.1	15	19	6	13	14	23	16	14	15	17
Solyc00g014850.1.1	10	11	8	8	15	5	7	7	26	17
Solyc00g014860.1.1	0	3	0	1	0	0	1	0	0	1
Solyc00g014960.1.1	0	0	0	0	0	0	0	0	0	0
Solyc00g014970.1.1	0	0	0	0	0	0	0	0	0	0
Solyc00g014980.1.1	0	0	0	0	0	0	0	0	0	0
Solyc00g014990.1.1	0	0	0	0	0	0	0	0	0	0
Solyc00g015000.1.1	0	0	0	0	0	0	0	0	0	0
Solyc00g015600.1.1	0	0	0	0	0	0	0	0	0	0
Solyc00g015610.1.1	0	0	0	0	0	0	0	0	0	0
Solyc00g015720.1.1	0	0	0	0	0	0	0	0	0	0
Solyc00g015730.1.1	0	0	0	0	0	0	0	0	0	0
Solyc00g015740.1.1	0	0	0	0	0	0	0	0	0	0
Solyc00g015750.1.1	0	0	0	0	0	0	0	0	0	0
Solyc00g015760.1.1	0	0	0	1	0	0	0	0	0	0
Solyc00g015770.1.1	0	0	0	0	0	0	0	0	0	0
Solyc00g016470.1.1	0	0	0	0	0	0	0	0	0	0
Solyc00g016480.1.1	0	0	0	0	0	0	0	0	0	0
Solyc00g016490.1.1	0	0	0	0	0	0	0	0	0	0
Solyc00g016590.1.1	0	0	0	0	0	0	0	0	0	0
Solyc00g016790.1.1	0	0	0	0	0	0	0	0	0	0
Solyc00g016890.1.1	0	0	0	0	0	0	0	0	0	0
Solyc00g016900.1.1	0	0	0	0	0	0	0	0	0	0
Solyc00g016910.1.1	0	0	0	0	0	0	0	0	0	0
Solyc00g017210.1.1	0	1	0	0	0	0	0	0	0	0
Solyc00g017220.1.1	0	0	0	0	0	0	0	0	0	0
Solyc00g017230.1.1	0	0	0	0	0	0	0	0	0	0
Solyc00g017530.1.1	0	0	0	0	0	0	0	0	0	0
Solyc00g017540.1.1	1	0	0	0	0	0	0	0	0	0
Solyc00g017550.1.1	0	1	0	1	0	1	0	0	0	1
Solyc00g017750.1.1	0	0	0	0	0	0	0	0	0	0
Solyc00g017760.1.1	0	0	0	0	0	0	0	0	0	0
Solyc00g017860.1.1	0	0	0	0	0	0	0	0	0	0
Solyc00g017870.1.1	0	0	0	0	0	0	0	0	0	0
Solyc00g017880.1.1	0	0	0	0	0	0	0	0	0	0
Solyc00g017890.1.1	0	0	0	0	0	0	0	0	0	0
Solyc00g017900.1.1	0	0	0	0	0	0	0	0	0	0
Solyc00g017910.1.1	0	0	0	0	0	0	0	0	0	0
Solyc00g017920.1.1	0	0	0	0	0	0	0	0	0	0
Solyc00g017930.1.1	0	0	0	0	0	0	0	0	0	0
Solyc00g018760.1.1	0	0	0	0	0	0	0	0	0	0
Solyc00g018770.1.1	0	0	0	0	0	0	0	0	0	0
Solyc00g018970.1.1	0	0	0	0	0	0	0	0	0	0
Solyc00g019610.1.1	0	0	0	0	0	0	0	0	0	0
Solyc00g019620.1.1	0	0	0	0	0	0	0	0	0	0
Solyc00g019630.1.1	0	0	0	0	0	0	0	0	0	0
Solyc00g019730.1.1	54	69	50	49	49	69	28	31	75	51
Solyc00g019740.1.1	28	31	32	36	33	23	15	18	45	35
Solyc00g019750.1.1	24	19	9	13	6	6	6	5	12	8
Solyc00g019950.1.1	8	6	5	4	6	2	9	5	5	7
Solyc00g019960.1.1	2	3	3	4	4	5	3	5	9	4
Solyc00g019970.2.1	4	5	6	6	7	6	13	8	11	13
Solyc00g019980.2.1	18	17	9	17	13	10	36	32	30	17
Solyc00g019990.1.1	8	3	2	2	5	3	2	4	9	10
Solyc00g020000.1.1	318	371	219	249	187	207	273	324	325	366
Solyc00g020010.1.1	223	201	139	162	106	101	160	175	203	212
Solyc00g020020.2.1	31	32	32	38	21	27	45	52	48	60
Solyc00g020030.1.1	1	2	0	0	0	1	9	6	5	4
Solyc00g020040.1.1	3	8	3	0	2	2	4	2	2	5
Solyc00g020440.1.1	0	0	0	1	0	0	0	0	0	0
Solyc00g020540.1.1	0	0	0	0	0	0	0	0	0	0
Solyc00g020840.2.1	4	6	4	4	5	2	0	2	0	2
Solyc00g020940.1.1	0	0	0	0	0	0	0	0	0	0
Solyc00g020950.1.1	0	0	0	0	0	0	0	0	0	0
Solyc00g020960.1.1	0	0	0	0	0	0	0	0	0	0
Solyc00g020970.1.1	0	0	0	0	0	0	0	0	0	0
Solyc00g020980.1.1	0	0	0	0	0	0	0	0	0	0
Solyc00g020990.1.1	0	0	0	0	0	0	0	0	0	0
Solyc00g021490.1.1	0	0	0	0	0	0	0	0	0	0
Solyc00g021500.1.1	0	0	0	0	0	0	0	0	0	0
Solyc00g021510.1.1	0	0	0	0	0	0	0	0	0	0
Solyc00g021520.1.1	0	0	0	0	0	0	0	0	0	0
Solyc00g021530.1.1	0	0	0	0	0	0	0	0	0	0
Solyc00g021630.1.1	28	30	23	25	31	26	12	20	21	26
Solyc00g021640.2.1	24	25	21	10	12	27	26	35	33	34
Solyc00g021650.1.1	0	0	0	0	0	1	1	1	1	1
Solyc00g021660.1.1	0	1	0	0	0	0	0	0	0	0
Solyc00g022070.1.1	1	2	0	1	0	2	1	1	1	2
Solyc00g022080.1.1	0	1	1	0	0	0	0	0	0	1
Solyc00g022090.1.1	3	0	3	1	2	2	2	2	3	1
Solyc00g022100.1.1	8	7	4	6	6	8	11	4	13	9
Solyc00g022110.2.1	46	45	43	36	44	41	32	41	66	65
Solyc00g022920.1.1	0	0	0	0	0	0	0	0	0	0
Solyc00g023020.1.1	0	0	0	1	0	0	0	0	0	0
Solyc00g023030.1.1	0	0	0	0	0	0	0	0	0	0
Solyc00g023040.1.1	0	0	0	0	0	0	0	0	0	0
Solyc00g023050.1.1	0	0	0	0	0	0	0	0	0	0
Solyc00g023250.1.1	0	0	0	0	0	0	0	0	0	0
Solyc00g023260.1.1	0	0	0	0	0	0	0	0	0	0
Solyc00g023270.1.1	0	0	1	0	0	0	0	0	0	0
Solyc00g023470.1.1	0	0	0	0	0	0	0	0	0	0
Solyc00g023570.1.1	2	0	1	0	0	0	4	1	4	1
Solyc00g023580.1.1	0	0	1	1	0	0	2	3	1	2
Solyc00g023590.2.1	7	4	3	3	8	7	7	4	7	3
Solyc00g023600.1.1	23	17	14	20	33	15	13	17	12	15
Solyc00g023700.2.1	0	0	1	1	0	0	2	0	2	1
Solyc00g023710.1.1	0	0	0	1	0	0	0	1	2	0
Solyc00g024010.1.1	0	0	0	0	0	0	0	0	0	0
Solyc00g024020.1.1	0	0	0	0	0	0	0	0	0	0
Solyc00g024030.1.1	0	0	0	0	0	0	0	0	0	0
Solyc00g024040.1.1	0	0	0	0	0	0	0	0	0	0
Solyc00g024050.1.1	0	0	0	0	0	0	0	0	0	0
Solyc00g024150.2.1	266	271	189	237	162	154	183	217	241	259
Solyc00g024160.1.1	1	0	1	1	0	0	1	3	1	1
Solyc00g024170.1.1	0	0	0	0	1	0	0	2	1	0
Solyc00g024370.1.1	0	0	0	0	0	0	0	0	0	0
Solyc00g024570.1.1	0	0	0	0	0	0	0	0	0	0
Solyc00g024670.1.1	0	0	0	0	0	0	0	0	0	0
Solyc00g024680.1.1	0	0	0	0	0	0	0	0	0	0
Solyc00g024690.1.1	0	0	0	0	0	0	0	0	0	0
Solyc00g025290.1.1	130	133	108	123	137	153	130	131	152	182
Solyc00g025300.1.1	1	1	1	2	0	1	0	1	0	3
Solyc00g025400.2.1	2	1	1	1	3	3	7	5	5	4
Solyc00g025500.1.1	0	0	0	0	0	0	0	0	0	0
Solyc00g025510.1.1	0	0	0	0	0	0	0	0	0	0
Solyc00g025520.1.1	0	0	0	0	0	0	0	0	0	0
Solyc00g025530.1.1	0	0	0	0	0	0	0	0	0	0
Solyc00g025540.1.1	0	0	0	0	0	0	0	0	0	0
Solyc00g025650.1.1	0	0	0	0	0	0	0	0	0	0
Solyc00g025660.1.1	0	0	0	0	0	0	0	0	0	0
Solyc00g026160.2.1	19	26	33	28	18	21	26	26	21	24
Solyc00g026860.1.1	0	0	0	0	0	0	0	0	0	0
Solyc00g026870.1.1	0	0	0	0	0	0	0	0	0	0
Solyc00g026880.1.1	0	0	0	0	0	0	0	0	0	0
Solyc00g026890.1.1	0	0	0	0	0	0	0	0	0	0
Solyc00g026900.1.1	0	0	0	0	0	0	0	0	0	0
Solyc00g027120.1.1	0	0	0	0	0	0	0	0	0	0
Solyc00g027130.1.1	0	0	0	0	0	0	0	0	0	0
Solyc00g027140.1.1	0	0	0	0	0	0	0	0	0	0
Solyc00g027640.1.1	0	0	0	0	0	0	0	0	0	0
Solyc00g027650.1.1	0	0	0	0	0	0	0	0	0	0
Solyc00g027660.1.1	0	0	0	0	0	0	0	0	0	0
Solyc00g027670.1.1	0	0	0	0	0	0	0	0	0	0
Solyc00g027770.2.1	753	769	613	675	804	769	443	493	605	641
Solyc00g027870.1.1	0	0	0	0	0	0	0	0	0	0
Solyc00g027970.1.1	0	0	0	0	0	0	1	0	0	0
Solyc00g027980.1.1	0	0	0	0	0	0	0	0	0	0
Solyc00g027990.1.1	0	0	0	0	0	0	0	0	0	0
Solyc00g028090.1.1	0	0	0	0	0	0	0	0	0	0
Solyc00g028100.1.1	0	0	0	0	0	0	0	0	0	0
Solyc00g028110.1.1	0	0	0	0	0	0	0	0	0	0
Solyc00g028120.1.1	0	0	0	0	0	0	0	0	0	0
Solyc00g028420.1.1	0	0	0	0	0	0	0	0	0	0
Solyc00g028520.1.1	0	0	0	0	0	0	0	0	0	0
Solyc00g028530.1.1	0	0	0	0	0	0	0	0	0	0
Solyc00g028540.1.1	0	0	0	0	0	0	0	0	0	0
Solyc00g028550.1.1	0	0	0	0	0	0	0	0	0	0
Solyc00g028560.1.1	0	0	0	0	0	0	0	0	0	0
Solyc00g028760.1.1	0	0	0	0	0	0	0	0	0	0
Solyc00g028960.1.1	0	0	0	0	0	0	0	0	0	0
Solyc00g029060.1.1	0	0	0	0	0	0	0	0	0	0
Solyc00g029070.1.1	0	0	0	0	0	0	0	0	0	0
Solyc00g029080.1.1	0	0	0	0	0	0	0	0	0	0
Solyc00g029090.1.1	0	0	0	0	0	0	0	0	0	0
Solyc00g029190.2.1	2	3	3	0	0	1	0	0	0	1
Solyc00g029290.1.1	0	0	0	0	0	0	0	0	0	0
Solyc00g029300.1.1	0	0	0	0	0	0	0	0	0	0
Solyc00g029500.1.1	0	0	0	0	0	0	0	0	0	0
Solyc00g029800.1.1	0	0	0	0	0	0	0	0	0	0
Solyc00g030000.1.1	0	0	0	0	0	0	0	0	0	0
Solyc00g030100.1.1	42	41	28	36	42	40	47	32	38	56
Solyc00g030110.1.1	0	0	0	0	0	0	0	0	0	0
Solyc00g030210.1.1	0	0	0	0	0	0	0	0	0	0
Solyc00g030510.2.1	0	1	0	0	0	0	0	0	0	0
Solyc00g030520.2.1	274	303	215	235	170	215	184	213	258	247
Solyc00g030820.1.1	1	0	1	0	0	1	0	0	0	0
Solyc00g031020.1.1	0	0	0	0	0	0	0	0	0	0
Solyc00g031030.1.1	0	0	0	0	0	0	0	0	0	0
Solyc00g031040.1.1	1	1	0	0	1	1	1	1	2	1
Solyc00g031050.1.1	0	0	0	0	0	0	0	0	0	0
Solyc00g031060.1.1	0	0	0	0	0	0	0	0	0	0
Solyc00g031360.1.1	0	0	0	0	0	0	0	0	0	0
Solyc00g031370.1.1	0	0	0	0	0	0	0	0	0	0
Solyc00g031380.1.1	0	0	0	0	0	0	0	0	0	0
Solyc00g031390.1.1	0	0	0	0	0	0	0	0	0	0
Solyc00g031490.1.1	0	0	0	0	0	0	0	0	0	0
Solyc00g031500.1.1	0	0	0	0	0	0	0	0	0	0
Solyc00g031700.1.1	0	0	0	0	0	0	0	0	0	0
Solyc00g031710.1.1	0	0	0	0	0	0	0	0	0	0
Solyc00g031720.1.1	0	0	0	0	0	0	0	0	0	0
Solyc00g031730.1.1	0	0	0	0	0	0	0	0	0	0
Solyc00g032030.1.1	0	0	0	0	0	0	0	0	0	0
Solyc00g032230.1.1	0	0	0	0	0	0	0	0	0	0
Solyc00g032940.1.1	0	0	0	0	0	0	0	0	0	0
Solyc00g033460.2.1	3	6	1	0	2	2	0	0	0	0
Solyc00g033860.1.1	0	0	0	0	0	0	0	0	0	0
Solyc00g033870.1.1	0	0	0	0	0	0	0	0	0	0
Solyc00g033880.1.1	0	0	0	0	0	0	0	0	0	0
Solyc00g033890.1.1	0	0	0	0	0	0	0	0	0	0
Solyc00g033990.1.1	0	0	0	0	0	0	0	0	0	0
Solyc00g034000.1.1	0	0	0	0	0	0	0	0	0	0
Solyc00g034010.1.1	0	0	0	0	0	0	0	0	0	0
Solyc00g034810.1.1	1	1	0	0	1	1	0	0	0	1
Solyc00g035010.1.1	0	0	0	0	0	0	0	0	0	0
Solyc00g035020.1.1	0	0	0	0	0	0	0	0	0	0
Solyc00g036320.1.1	0	1	0	0	0	0	0	0	0	0
Solyc00g036520.1.1	1	0	0	1	1	0	0	2	1	2
Solyc00g036530.1.1	0	0	0	0	0	0	0	1	0	3
Solyc00g036540.1.1	0	0	0	0	0	1	0	0	0	0
Solyc00g036740.1.1	0	0	0	0	0	0	0	0	0	0
Solyc00g036750.1.1	1	1	0	1	0	0	0	1	0	0
Solyc00g036760.1.1	0	0	0	0	0	0	0	0	0	0
Solyc00g036960.1.1	0	0	0	0	0	0	0	0	0	0
Solyc00g038390.1.1	0	0	0	0	0	0	0	0	0	0
Solyc00g039290.1.1	0	0	0	0	0	0	0	0	0	0
Solyc00g039990.2.1	147	141	124	128	73	84	86	79	109	98
Solyc00g040290.1.1	0	0	0	0	0	0	0	0	0	0
Solyc00g040390.1.1	0	0	0	0	0	0	0	0	0	0
Solyc00g040490.1.1	0	0	0	0	0	0	0	0	0	0
Solyc00g041090.1.1	1	2	0	1	0	0	1	0	0	0
Solyc00g041190.1.1	1	0	0	0	0	0	0	0	0	0
Solyc00g041200.1.1	0	0	0	0	0	0	0	0	0	0
Solyc00g041210.1.1	0	0	0	0	0	0	0	0	0	0
Solyc00g041220.1.1	0	0	0	0	0	0	0	0	0	0
Solyc00g042120.1.1	0	0	0	0	0	0	0	0	0	0
Solyc00g042130.1.1	0	0	0	0	0	0	0	0	0	0
Solyc00g042140.1.1	0	0	0	0	0	0	0	0	0	0
Solyc00g042640.1.1	27	33	29	33	28	27	20	24	22	28
Solyc00g042840.1.1	0	0	0	1	0	0	0	0	0	0
Solyc00g042850.1.1	0	0	0	0	0	0	1	0	0	0
Solyc00g044350.2.1	350	395	325	415	371	402	152	189	178	158
Solyc00g044550.1.1	0	0	0	0	0	0	0	0	0	1
Solyc00g044750.1.1	0	0	0	0	0	0	0	0	0	0
Solyc00g045570.1.1	0	0	0	2	0	0	2	0	0	1
Solyc00g046570.1.1	0	0	0	0	0	0	0	0	0	0
Solyc00g046580.1.1	0	0	0	0	0	0	0	0	0	0
Solyc00g046980.1.1	2	2	1	3	1	1	1	1	3	1
Solyc00g047180.1.1	0	0	0	0	0	0	0	0	0	0
Solyc00g047190.1.1	1	0	0	1	0	0	0	0	0	0
Solyc00g047200.1.1	2	0	1	1	1	2	1	0	1	1
Solyc00g047700.2.1	5960	6067	5465	5672	3718	3686	5571	6159	6885	7157
Solyc00g047810.1.1	0	0	0	0	0	0	0	0	0	0
Solyc00g048410.1.1	0	0	0	0	0	0	0	0	0	0
Solyc00g048510.2.1	0	0	0	0	0	0	0	0	0	0
Solyc00g049210.1.1	16	15	14	10	20	14	16	17	17	19
Solyc00g049220.1.1	3	2	2	0	3	1	3	2	5	4
Solyc00g049520.2.1	4	0	1	1	0	0	0	1	0	1
Solyc00g049620.1.1	0	0	0	0	0	0	0	0	0	0
Solyc00g049920.1.1	0	0	0	0	0	0	0	0	0	0
Solyc00g050020.1.1	0	0	0	0	0	0	0	0	0	0
Solyc00g050030.1.1	0	0	0	0	0	0	0	0	0	0
Solyc00g050130.1.1	96	98	77	76	91	72	89	118	148	114
Solyc00g050430.2.1	284	310	292	303	152	154	285	321	353	317
Solyc00g052430.2.1	9	17	13	10	12	7	10	14	15	21
Solyc00g052530.2.1	0	5	2	2	2	2	4	1	3	1
Solyc00g052540.1.1	0	0	0	0	1	0	0	0	0	0
Solyc00g052940.2.1	0	0	0	0	0	0	0	0	0	0
Solyc00g053440.2.1	121	147	134	130	148	152	96	133	133	129
Solyc00g053740.1.1	0	0	0	0	0	0	0	0	0	0
Solyc00g055940.1.1	0	0	0	0	0	0	0	0	0	0
Solyc00g055950.1.1	0	3	1	0	0	1	0	0	1	0
Solyc00g055960.1.1	2	1	0	1	0	0	1	0	0	3
Solyc00g055970.1.1	1	0	0	0	0	0	0	0	0	0
Solyc00g055980.1.1	1	2	1	2	0	1	1	0	3	0
Solyc00g056180.1.1	0	0	0	0	0	0	0	0	0	0
Solyc00g056680.1.1	26	37	17	35	22	14	26	24	22	22
Solyc00g057280.1.1	0	0	0	0	0	0	0	0	0	0
Solyc00g057880.2.1	0	0	0	0	0	0	0	0	0	0
Solyc00g058280.1.1	0	0	0	0	0	0	0	0	0	0
Solyc00g058480.1.1	0	0	0	0	0	0	0	0	0	0
Solyc00g058490.1.1	0	0	0	0	0	0	0	0	0	0
Solyc00g058890.1.1	0	0	0	0	0	0	0	0	0	0
Solyc00g058900.1.1	0	0	0	0	0	0	0	0	0	0
Solyc00g059100.2.1	377	357	300	348	276	278	215	287	346	308
Solyc00g059500.1.1	39	43	19	26	18	22	20	25	29	28
Solyc00g060700.1.1	0	0	0	0	0	0	0	0	0	0
Solyc00g060710.1.1	0	0	0	0	0	0	0	0	0	0
Solyc00g060810.2.1	0	0	0	0	0	0	0	0	0	0
Solyc00g062710.1.1	0	0	0	0	0	0	0	0	0	0
Solyc00g063110.2.1	0	0	0	0	0	0	0	0	0	0
Solyc00g063510.1.1	0	0	0	0	0	0	0	0	0	0
Solyc00g065510.1.1	0	0	0	0	0	0	0	0	0	0
Solyc00g065610.1.1	0	0	0	0	0	0	0	0	0	0
Solyc00g065620.1.1	0	0	0	0	0	0	0	0	0	0
Solyc00g065630.1.1	0	0	0	0	0	0	0	0	0	0
Solyc00g065930.1.1	0	0	0	0	0	0	0	0	0	0
Solyc00g065940.1.1	0	0	0	0	0	0	0	0	0	0
Solyc00g066140.1.1	0	0	0	0	0	0	0	0	0	0
Solyc00g066150.1.1	0	0	0	0	0	0	0	0	0	0
Solyc00g066350.1.1	1	0	0	0	0	0	0	0	0	0
Solyc00g066360.1.1	0	0	1	0	0	0	0	0	1	0
Solyc00g066370.1.1	0	0	0	0	0	0	0	0	0	0
Solyc00g067470.1.1	0	0	0	0	1	0	0	0	0	0
Solyc00g068970.2.1	1474	1475	747	886	940	965	881	1041	1708	1706
Solyc00g068980.1.1	1078	1111	512	716	1188	1392	1023	1263	1707	1985
Solyc00g069680.1.1	0	0	0	0	0	0	0	0	0	0
Solyc00g069880.2.1	2	2	2	3	1	4	6	6	4	7
Solyc00g070680.1.1	0	0	0	0	0	0	0	0	0	0
Solyc00g071180.2.1	0	0	1	0	2	2	2	0	3	6
Solyc00g071580.1.1	0	0	0	0	0	0	0	0	0	0
Solyc00g071590.1.1	0	0	0	0	0	0	0	0	0	0
Solyc00g071600.1.1	0	0	0	0	0	0	0	0	0	0
Solyc00g072100.2.1	263	263	216	255	221	198	234	240	333	342
Solyc00g072400.2.1	0	0	0	0	0	0	0	0	0	0
Solyc00g072800.2.1	1	2	0	1	0	1	1	0	0	2
Solyc00g073200.1.1	0	0	0	0	0	0	0	0	0	0
Solyc00g073900.1.1	0	0	0	0	0	0	0	0	0	0
Solyc00g073910.1.1	0	0	0	0	0	0	0	0	0	0
Solyc00g074210.1.1	1	0	0	0	0	1	0	0	0	0
Solyc00g074810.1.1	0	0	0	0	0	0	0	0	0	0
Solyc00g074820.1.1	0	0	0	0	0	0	0	0	0	0
Solyc00g074830.1.1	0	0	0	0	0	0	0	0	0	0
Solyc00g075030.2.1	1	1	1	1	2	1	0	1	1	1
Solyc00g075040.1.1	1	3	0	2	3	1	0	0	1	0
Solyc00g075440.1.1	0	3	1	0	12	10	2	6	2	4
Solyc00g075450.2.1	2	3	1	7	10	12	4	1	5	1
Solyc00g076250.1.1	0	2	2	2	2	3	0	0	0	0
Solyc00g079050.1.1	0	0	0	0	0	0	0	0	0	0
Solyc00g080550.1.1	0	0	0	0	0	0	0	0	0	0
Solyc00g080750.2.1	11	9	3	5	6	4	2	2	6	1
Solyc00g082150.2.1	1440	1496	1293	1438	1073	1065	864	969	1171	1123
Solyc00g082550.1.1	0	0	0	0	0	0	0	0	0	0
Solyc00g084650.1.1	0	0	0	0	0	0	0	0	0	0
Solyc00g084750.2.1	0	0	0	0	0	0	0	0	0	0
Solyc00g084760.1.1	0	0	0	0	0	0	1	0	0	0
Solyc00g084770.1.1	0	1	1	1	0	0	0	1	0	0
Solyc00g084870.2.1	52	34	35	47	97	106	51	38	72	75
Solyc00g085070.2.1	1101	1160	1011	1061	807	805	417	514	491	538
Solyc00g085370.1.1	0	0	0	0	0	0	0	0	0	0
Solyc00g085770.1.1	0	0	0	0	0	0	0	0	0	0
Solyc00g085780.1.1	0	0	0	0	0	0	0	0	0	0
Solyc00g088080.1.1	0	0	0	0	0	0	0	0	0	0
Solyc00g088090.1.1	0	0	0	0	0	0	0	0	0	0
Solyc00g088190.1.1	0	1	0	0	0	0	0	1	0	0
Solyc00g088200.1.1	0	0	0	0	0	0	0	0	0	0
Solyc00g088210.1.1	1	1	0	0	1	0	0	0	0	1
Solyc00g090110.1.1	0	0	0	0	0	0	0	0	0	0
Solyc00g090120.1.1	0	0	0	0	0	0	0	0	0	0
Solyc00g090130.1.1	0	0	0	0	0	0	1	0	0	0
Solyc00g090430.2.1	0	0	0	0	0	0	3	0	0	0
Solyc00g090630.1.1	0	0	0	0	0	0	0	0	0	0
Solyc00g090640.1.1	0	0	0	0	0	0	0	0	0	0
Solyc00g090650.1.1	0	0	0	0	0	0	0	0	0	0
Solyc00g090660.1.1	0	0	0	0	0	0	0	0	0	0
Solyc00g090860.1.1	0	0	0	0	0	0	0	0	0	0
Solyc00g090870.2.1	532	531	385	401	392	442	257	301	417	391
Solyc00g091170.2.1	283	303	218	213	163	150	139	134	179	183
Solyc00g092870.1.1	0	0	0	0	0	0	0	0	0	0
Solyc00g092880.1.1	0	0	0	0	0	0	0	0	0	0
Solyc00g092890.1.1	0	0	0	0	0	0	0	0	0	0
Solyc00g092900.1.1	0	0	0	0	0	0	0	0	0	0
Solyc00g093000.1.1	15	10	13	7	6	4	3	3	14	12
Solyc00g093100.1.1	0	0	0	0	0	0	0	0	0	0
Solyc00g093300.1.1	0	0	0	0	0	0	0	0	0	0
Solyc00g093310.1.1	0	0	0	0	0	0	0	0	0	0
Solyc00g094010.1.1	0	0	0	0	0	0	0	0	0	0
Solyc00g094020.1.1	0	0	0	0	0	0	0	0	0	0
Solyc00g094520.1.1	8	10	13	9	10	16	8	12	17	14
Solyc00g094530.1.1	10	12	4	3	2	5	6	6	5	9
Solyc00g094540.1.1	12	14	9	18	18	18	12	15	24	25
Solyc00g094550.1.1	0	1	0	0	1	0	0	0	0	0
Solyc00g094850.1.1	0	0	0	2	0	0	0	0	0	0
Solyc00g095450.1.1	0	0	0	0	0	0	0	0	0	0
Solyc00g095460.1.1	0	0	0	0	0	0	0	0	0	0
Solyc00g095760.1.1	0	0	0	0	0	0	0	0	0	0
Solyc00g095860.1.1	0	0	0	0	0	0	0	0	0	0
Solyc00g096060.1.1	0	0	0	0	0	0	0	0	0	0
Solyc00g096460.1.1	115	147	137	136	118	126	61	95	125	119
Solyc00g097260.1.1	0	0	0	0	0	0	1	0	0	0
Solyc00g097760.1.1	0	0	0	0	0	0	0	0	0	0
Solyc00g097960.1.1	187	178	140	153	118	104	75	77	131	129
Solyc00g098560.2.1	55	53	45	63	65	51	23	17	22	31
Solyc00g099160.1.1	0	0	0	0	0	0	0	0	0	0
Solyc00g099460.1.1	0	0	0	0	0	0	0	0	0	0
Solyc00g099470.1.1	0	0	0	0	0	0	0	0	0	0
Solyc00g099570.1.1	0	0	0	0	0	0	0	0	0	0
Solyc00g099580.1.1	56	67	36	43	30	38	24	24	48	43
Solyc00g099880.1.1	0	0	0	0	0	0	0	0	0	0
Solyc00g100880.2.1	0	0	0	0	0	0	0	0	0	0
Solyc00g101700.1.1	0	0	0	0	0	0	0	0	0	0
Solyc00g102000.1.1	280	286	119	40	48	33	53	45	165	142
Solyc00g102400.2.1	0	0	0	0	0	0	0	0	0	0
Solyc00g104200.1.1	0	0	0	0	0	0	0	0	0	0
Solyc00g104210.1.1	0	0	0	0	0	0	0	0	0	0
Solyc00g104310.1.1	0	0	0	0	0	0	0	0	0	0
Solyc00g104320.1.1	0	0	0	0	0	0	0	0	0	0
Solyc00g104330.1.1	0	0	0	0	0	0	0	0	0	0
Solyc00g104630.1.1	0	0	0	0	0	0	0	0	0	0
Solyc00g104730.1.1	0	0	0	0	0	0	0	0	0	0
Solyc00g104740.1.1	0	0	0	0	0	0	0	0	0	0
Solyc00g104940.1.1	0	0	0	0	0	0	0	0	0	0
Solyc00g105340.1.1	0	0	0	0	0	0	0	0	0	0
Solyc00g105350.1.1	0	0	0	0	0	0	0	0	0	0
Solyc00g105750.1.1	0	0	0	0	0	0	0	0	1	0
Solyc00g106650.1.1	17	14	26	21	10	7	10	13	20	14
Solyc00g107050.1.1	0	0	0	0	0	0	0	0	0	0
Solyc00g107550.1.1	0	0	0	0	0	0	0	0	0	0
Solyc00g108550.1.1	9	4	5	1	7	12	13	10	13	11
Solyc00g109450.1.1	0	0	0	0	0	0	0	0	0	0
Solyc00g109850.1.1	0	0	0	0	0	0	0	0	0	0
Solyc00g109860.1.1	0	0	0	0	0	0	0	0	0	0
Solyc00g110060.1.1	0	0	0	0	0	0	0	0	0	0
Solyc00g110070.1.1	0	0	0	0	0	0	0	0	0	0
Solyc00g110370.1.1	0	0	0	0	0	0	0	0	0	0
Solyc00g110870.2.1	382	390	373	348	217	216	298	285	351	296
Solyc00g111170.1.1	0	0	0	0	0	0	0	0	0	0
Solyc00g111270.1.1	0	0	0	0	0	0	0	0	0	0
Solyc00g111370.1.1	0	0	0	0	0	0	0	0	0	0
Solyc00g111770.1.1	0	0	0	0	0	0	0	0	0	0
Solyc00g111780.1.1	0	0	0	0	0	0	0	0	0	0
Solyc00g112180.1.1	0	0	0	0	0	0	0	0	0	0
Solyc00g112190.2.1	0	2	1	1	0	0	1	0	0	1
Solyc00g112490.1.1	0	0	0	0	0	0	0	0	0	0
Solyc00g112500.1.1	0	0	0	0	0	0	0	0	0	0
Solyc00g112600.1.1	0	0	0	0	0	0	0	0	0	0
Solyc00g112700.1.1	0	0	0	0	0	0	0	0	0	0
Solyc00g112710.1.1	0	0	0	0	0	0	0	0	0	0
Solyc00g112810.1.1	0	0	0	0	0	0	0	0	0	0
Solyc00g112820.1.1	0	0	0	0	0	0	0	0	0	0
Solyc00g112830.1.1	0	0	0	0	0	0	0	0	0	0
Solyc00g112930.2.1	2	2	5	2	5	2	0	1	2	1
Solyc00g113230.1.1	0	0	0	0	0	0	0	0	0	0
Solyc00g113330.1.1	0	0	0	0	0	0	0	0	0	0
Solyc00g113730.1.1	0	0	0	0	0	0	0	0	0	0
Solyc00g113740.1.1	0	0	0	0	0	0	0	0	0	0
Solyc00g113750.1.1	0	0	0	0	0	0	0	0	0	0
Solyc00g114550.1.1	0	0	0	0	0	0	0	0	0	0
Solyc00g116150.1.1	0	0	0	0	0	0	0	0	0	0
Solyc00g117450.2.1	17	15	4	7	5	5	1	6	2	5
Solyc00g117650.1.1	0	0	0	0	0	0	0	0	0	0
Solyc00g118680.2.1	67	57	48	79	64	65	37	55	53	45
Solyc00g118690.1.1	84	78	81	83	95	109	63	77	66	54
Solyc00g120120.1.1	0	0	0	0	0	0	0	0	0	0
Solyc00g120820.1.1	0	0	0	0	0	0	0	0	0	0
Solyc00g120830.1.1	0	0	0	0	0	0	0	0	0	0
Solyc00g120930.1.1	0	0	0	0	0	0	0	0	0	0
Solyc00g121230.1.1	0	0	0	0	0	0	0	0	0	0
Solyc00g121730.1.1	0	0	0	0	0	0	0	0	0	0
Solyc00g122530.1.1	0	0	0	0	0	0	0	0	0	0
Solyc00g123030.1.1	0	0	0	0	0	0	0	0	0	0
Solyc00g123040.1.1	0	0	0	0	0	0	0	0	0	0
Solyc00g123240.1.1	0	0	0	0	0	0	0	0	0	0
Solyc00g124840.1.1	0	0	0	0	0	0	0	0	0	0
Solyc00g124850.1.1	0	0	0	0	0	0	0	0	0	0
Solyc00g124860.1.1	0	0	0	0	0	0	0	0	0	0
Solyc00g125260.1.1	0	0	0	0	0	0	0	0	0	0
Solyc00g125270.1.1	0	0	0	0	0	0	0	0	0	0
Solyc00g125580.1.1	0	0	0	0	0	0	0	0	0	0
Solyc00g125980.1.1	112	109	101	89	114	127	105	142	143	153
Solyc00g125990.1.1	7	14	9	10	9	5	12	6	8	11
Solyc00g126000.1.1	78	72	92	95	84	114	65	96	77	90
Solyc00g126010.1.1	49	37	40	49	47	44	40	41	69	50
Solyc00g126420.1.1	0	0	0	0	0	0	0	0	0	0
Solyc00g126430.1.1	0	0	0	0	0	0	0	0	0	0
Solyc00g126440.1.1	0	0	0	0	0	0	0	0	0	0
Solyc00g127540.1.1	0	0	0	0	0	1	0	0	0	0
Solyc00g127550.1.1	0	0	0	0	0	0	0	0	0	0
Solyc00g127560.1.1	0	0	0	0	0	0	1	0	0	0
Solyc00g127660.2.1	735	755	609	666	478	456	446	435	597	561
Solyc00g127670.1.1	136	163	153	149	104	90	132	139	124	146
Solyc00g127870.2.1	519	538	424	477	399	412	374	410	460	457
Solyc00g128870.2.1	1255	1320	911	987	1019	1058	614	722	848	848
Solyc00g129670.1.1	0	0	0	0	0	0	0	0	0	0
Solyc00g129680.1.1	0	0	0	0	0	0	0	0	0	0
Solyc00g129880.1.1	0	0	0	0	0	0	0	0	0	0
Solyc00g129980.1.1	0	0	0	0	0	0	0	0	0	0
Solyc00g130180.1.1	0	0	0	0	0	0	0	0	0	0
Solyc00g130190.1.1	0	0	0	0	0	0	0	0	0	0
Solyc00g130290.1.1	0	0	0	0	0	0	0	0	0	0
Solyc00g130690.1.1	0	0	0	0	0	0	0	0	0	0
Solyc00g130700.1.1	0	0	0	0	0	0	0	0	0	0
Solyc00g130800.1.1	0	0	0	0	0	0	0	0	0	0
Solyc00g130810.1.1	0	0	0	0	0	0	0	0	0	0
Solyc00g131610.1.1	0	0	0	0	0	0	0	0	0	0
Solyc00g131710.1.1	0	0	0	0	0	0	0	0	0	0
Solyc00g133110.1.1	0	0	0	0	0	0	0	0	0	0
Solyc00g133710.1.1	0	0	0	0	0	0	0	0	0	0
Solyc00g133720.1.1	0	0	0	0	0	0	0	0	0	0
Solyc00g134620.1.1	0	0	0	0	0	0	0	0	0	0
Solyc00g134820.1.1	0	0	0	0	0	0	0	0	0	0
Solyc00g134830.1.1	0	0	0	0	0	0	0	0	0	0
Solyc00g134840.1.1	0	0	0	0	0	0	0	0	0	0
Solyc00g135040.1.1	0	0	0	0	0	0	0	0	0	0
Solyc00g135050.1.1	0	0	0	0	0	0	0	0	0	0
Solyc00g135060.1.1	0	0	2	0	0	1	0	0	0	0
Solyc00g135260.1.1	0	0	0	0	0	0	0	0	0	0
Solyc00g136260.1.1	2	2	2	1	1	0	2	0	2	1
Solyc00g136560.2.1	18	20	22	19	19	8	21	32	22	23
Solyc00g138060.2.1	0	0	0	0	0	0	0	0	0	0
Solyc00g139760.1.1	0	0	0	0	0	0	0	0	0	0
Solyc00g140060.2.1	377	366	305	356	354	320	182	226	306	320
Solyc00g141360.1.1	2	2	10	5	6	5	4	3	4	1
Solyc00g141560.1.1	0	0	1	2	1	2	0	0	2	1
Solyc00g142160.1.1	0	2	2	0	1	1	0	0	0	1
Solyc00g142170.2.1	9	11	8	4	15	9	20	20	23	19
Solyc00g143770.1.1	168	213	183	175	146	162	108	115	153	165
Solyc00g144470.1.1	0	0	1	0	1	0	5	7	12	6
Solyc00g145170.1.1	6	19	12	16	65	49	6	5	5	11
Solyc00g147570.2.1	7	12	4	3	2	10	4	6	14	6
Solyc00g147770.1.1	4	5	7	4	8	6	4	2	2	2
Solyc00g149970.2.1	0	0	0	0	0	0	0	0	0	0
Solyc00g153680.1.1	0	0	1	0	3	3	2	3	4	1
Solyc00g153980.1.1	0	0	0	0	2	0	0	0	0	2
Solyc00g154480.1.1	0	0	0	1	0	0	0	0	0	0
Solyc00g154980.1.1	0	0	0	0	0	0	0	0	0	0
Solyc00g156980.2.1	409	458	280	251	216	220	131	138	234	228
Solyc00g157080.1.1	1	2	2	0	2	2	1	2	0	2
Solyc00g157180.2.1	0	0	0	0	0	0	0	0	0	0
Solyc00g160780.2.1	12	10	4	0	9	9	2	1	12	2
Solyc00g163580.1.1	0	0	0	0	0	0	0	0	0	0
Solyc00g164580.1.1	0	1	2	0	1	0	1	4	1	1
Solyc00g164680.1.1	71	67	63	53	87	78	43	49	38	44
Solyc00g165080.1.1	0	0	0	1	0	0	0	0	0	0
Solyc00g165090.1.1	0	0	0	0	0	0	0	0	0	0
Solyc00g165190.1.1	0	0	0	0	0	0	0	0	0	0
Solyc00g166190.1.1	0	0	0	0	0	0	0	0	0	0
Solyc00g166490.1.1	0	0	0	0	0	0	0	0	0	0
Solyc00g166690.1.1	1	0	2	2	2	1	0	0	1	0
Solyc00g167290.1.1	0	0	0	0	0	0	0	0	0	0
Solyc00g167300.1.1	0	0	0	0	0	0	0	0	0	0
Solyc00g167800.1.1	0	0	0	0	0	0	0	0	0	0
Solyc00g168200.1.1	0	0	0	0	0	0	1	0	0	0
Solyc00g170200.1.1	263	280	136	180	235	187	177	188	255	231
Solyc00g170210.2.1	97	92	92	90	108	110	79	89	88	103
Solyc00g170510.1.1	0	0	0	0	0	0	0	0	0	0
Solyc00g171710.1.1	0	0	0	0	0	0	0	0	0	0
Solyc00g171810.2.1	23	25	9	23	19	16	10	18	24	30
Solyc00g172410.1.1	0	0	0	0	0	0	0	0	0	0
Solyc00g173430.1.1	0	0	0	0	0	0	0	0	0	0
Solyc00g174330.2.1	0	0	0	0	0	0	0	0	1	0
Solyc00g174340.1.1	0	0	0	0	0	0	0	0	0	0
Solyc00g175240.1.1	0	0	0	0	0	0	0	0	0	0
Solyc00g178340.1.1	0	0	0	0	0	0	0	0	0	0
Solyc00g179240.1.1	22	22	24	16	16	27	3	7	14	11
Solyc00g179640.1.1	6	9	0	0	0	1	0	0	0	0
Solyc00g179840.1.1	0	0	0	0	0	0	0	0	0	0
Solyc00g180440.1.1	0	0	0	0	0	0	0	0	0	0
Solyc00g180840.1.1	0	0	0	0	0	0	0	0	0	0
Solyc00g181240.1.1	1	0	0	1	0	0	0	0	0	0
Solyc00g181250.2.1	1	2	2	3	1	1	2	4	1	2
Solyc00g183050.1.1	8	11	0	8	11	12	4	5	10	14
Solyc00g183550.1.1	0	0	0	0	0	0	0	0	0	0
Solyc00g184350.2.1	308	305	251	265	269	267	142	171	268	258
Solyc00g185750.1.1	0	0	0	0	0	0	0	0	0	0
Solyc00g185850.1.1	0	0	0	0	0	0	0	0	0	0
Solyc00g186050.1.1	4	2	1	0	2	1	2	2	4	0
Solyc00g187050.2.1	0	0	0	1	0	0	0	1	1	0
Solyc00g188250.1.1	0	0	0	0	0	0	0	0	0	0
Solyc00g188750.1.1	0	0	1	0	0	0	0	0	0	0
Solyc00g188850.2.1	3	7	2	2	4	1	3	2	2	4
Solyc00g192150.2.1	0	0	0	0	0	0	0	0	0	0
Solyc00g195350.1.1	0	0	0	0	0	0	0	0	0	0
Solyc00g195360.1.1	0	0	0	0	0	0	0	0	0	1
Solyc00g196060.2.1	2865	3016	2600	2815	2470	2556	3126	3516	5195	5133
Solyc00g196460.1.1	0	0	0	0	0	0	1	0	0	0
Solyc00g198360.1.1	0	0	0	0	0	0	0	0	0	0
Solyc00g199960.1.1	0	0	0	0	0	0	0	0	0	0
Solyc00g201060.1.1	0	1	0	0	0	0	0	0	0	0
Solyc00g201160.2.1	29	21	15	20	18	11	9	14	13	19
Solyc00g201460.1.1	0	0	0	0	0	0	0	0	0	0
Solyc00g201760.1.1	0	0	0	0	0	0	0	0	0	0
Solyc00g202560.1.1	0	0	0	0	0	0	0	0	0	0
Solyc00g203660.1.1	0	0	0	0	0	0	0	0	0	0
Solyc00g206460.1.1	22	18	27	36	6	14	37	58	49	45
Solyc00g207960.1.1	0	0	0	0	0	0	0	0	0	0
Solyc00g209460.1.1	21	24	12	21	22	24	22	18	25	13
Solyc00g209560.1.1	0	0	0	0	0	0	0	0	0	0
Solyc00g210860.1.1	0	0	1	3	0	1	0	0	0	3
Solyc00g212260.1.1	0	1	1	3	0	2	0	0	2	0
Solyc00g213960.1.1	0	0	0	0	0	0	0	0	0	0
Solyc00g215560.1.1	25	18	15	9	19	28	2	15	16	12
Solyc00g217560.1.1	0	0	0	0	0	0	0	0	0	0
Solyc00g217960.1.1	1	0	0	0	2	6	3	11	11	13
Solyc00g218560.1.1	0	0	0	0	0	0	0	0	0	0
Solyc00g220360.1.1	1	0	0	0	0	0	0	0	0	0
Solyc00g222060.1.1	0	0	0	0	0	0	0	0	0	0
Solyc00g222460.1.1	0	0	0	0	0	0	0	1	0	0
Solyc00g226760.1.1	0	0	0	0	0	0	0	0	0	0
Solyc00g227860.1.1	50	64	76	82	70	50	15	15	32	30
Solyc00g227960.1.1	0	0	0	0	0	0	0	0	0	0
Solyc00g228260.1.1	0	0	0	0	0	0	0	0	0	0
Solyc00g229260.1.1	0	0	0	0	0	0	0	0	0	0
Solyc00g230060.1.1	4	4	0	0	3	4	5	9	10	7
Solyc00g230070.1.1	13	14	1	1	0	0	0	1	2	3
Solyc00g230080.1.1	20	17	8	6	1	3	4	2	3	4
Solyc00g230280.1.1	0	0	0	0	0	0	0	0	0	0
Solyc00g231680.1.1	0	0	0	0	0	0	0	0	0	0
Solyc00g231780.1.1	18	24	6	2	9	12	3	8	3	6
Solyc00g233480.1.1	0	0	0	0	0	0	0	0	0	0
Solyc00g237680.1.1	0	0	0	0	0	0	0	0	0	0
Solyc00g240580.1.1	0	0	0	0	0	0	0	0	0	0
Solyc00g244280.1.1	6	6	5	2	2	1	4	3	2	1
Solyc00g244290.1.1	105	91	77	107	197	192	121	138	170	186
Solyc00g244300.1.1	194	150	148	155	221	242	181	242	207	259
Solyc00g245200.1.1	0	0	1	0	0	0	0	0	0	0
Solyc00g246800.1.1	0	0	0	0	0	0	0	0	0	0
Solyc00g247300.2.1	1	0	2	0	0	0	1	1	2	2
Solyc00g249200.1.1	0	0	0	0	0	0	0	0	0	0
Solyc00g249900.2.1	31	24	27	29	16	19	11	7	24	26
Solyc00g249910.1.1	0	0	0	0	0	0	0	0	0	0
Solyc00g254110.1.1	0	0	0	0	0	0	0	0	0	0
Solyc00g254910.1.1	3	6	2	0	4	3	5	1	2	5
Solyc00g255510.1.1	0	0	0	1	1	0	0	0	0	0
Solyc00g256710.1.1	14	14	18	20	16	17	12	10	12	30
Solyc00g257110.2.1	9	17	2	11	19	14	4	14	16	13
Solyc00g263210.1.1	0	0	0	0	0	0	0	0	0	0
Solyc00g265110.2.1	11	10	8	5	9	10	6	11	14	13
Solyc00g265510.1.1	0	0	0	0	0	0	0	0	0	0
Solyc00g266110.1.1	0	0	0	0	0	0	0	0	0	0
Solyc00g268310.1.1	0	0	0	0	0	0	0	0	0	0
Solyc00g269810.1.1	0	0	0	0	0	0	0	0	0	0
Solyc00g270510.1.1	0	0	0	0	0	0	0	0	0	0
Solyc00g272810.1.1	0	1	0	0	0	0	1	0	0	0
Solyc00g273110.1.1	12	18	9	8	8	8	6	2	6	9
Solyc00g275310.1.1	0	0	0	0	0	0	0	0	0	0
Solyc00g277510.1.1	47	50	7	8	1	4	2	1	0	1
Solyc00g278110.2.1	2	1	1	0	0	0	0	0	4	1
Solyc00g280110.1.1	16	7	13	10	6	5	0	1	1	0
Solyc00g281110.1.1	1	1	2	1	1	1	0	0	1	0
Solyc00g282510.1.1	23	11	24	20	77	87	26	29	50	65
Solyc00g283010.1.1	0	0	1	0	0	0	1	0	0	0
Solyc00g283110.1.1	0	0	0	0	0	0	0	0	0	0
Solyc00g284510.1.1	0	0	0	0	0	0	0	0	0	0
Solyc00g286010.1.1	0	0	0	0	0	0	0	0	0	0
Solyc00g286020.1.1	0	0	0	0	0	0	0	0	0	0
Solyc00g286030.1.1	0	0	0	0	0	0	0	0	0	0
Solyc00g287330.1.1	0	0	0	0	0	0	0	0	0	0
Solyc00g289230.1.1	19	26	24	26	19	12	13	11	28	14
Solyc00g294230.1.1	5	5	8	7	1	0	3	1	5	6
Solyc00g294630.1.1	0	0	0	0	0	0	0	0	1	0
Solyc00g297330.1.1	0	0	0	0	0	0	0	0	0	0
Solyc00g300430.1.1	0	0	0	0	0	0	0	0	0	0
Solyc00g300730.1.1	0	0	0	0	0	0	0	0	0	0
Solyc00g303630.1.1	0	0	0	0	0	0	0	0	0	0
Solyc00g304030.1.1	0	0	0	0	0	0	0	0	0	0
Solyc00g304630.1.1	0	0	0	0	0	0	0	0	0	0
Solyc00g306730.1.1	0	1	0	0	0	0	0	0	0	0
Solyc00g306830.1.1	0	0	0	0	0	0	0	0	0	0
Solyc00g308530.1.1	0	0	0	0	0	0	0	0	0	0
Solyc00g308930.1.1	0	0	0	0	0	0	0	0	0	0
Solyc00g309530.1.1	0	0	0	0	0	1	0	0	0	0
Solyc00g311230.2.1	220	238	208	209	241	239	134	166	222	234
Solyc00g313030.1.1	0	2	1	2	0	0	1	0	2	0
Solyc00g313530.1.1	0	0	0	0	0	0	0	0	0	0
Solyc00g313930.1.1	0	0	0	0	0	0	0	0	0	0
Solyc00g316030.1.1	0	0	0	0	0	0	0	0	0	0
Solyc00g316530.1.1	19	20	15	18	28	20	32	33	34	41
Solyc00g316730.1.1	0	0	0	0	0	0	0	0	0	0
Solyc00g318030.1.1	0	0	0	0	0	0	0	0	0	0
Solyc00g318130.1.1	0	0	0	0	0	0	0	0	0	0
Solyc00g318830.1.1	1	3	0	1	0	0	0	0	0	1
Solyc00g320430.1.1	9	9	11	8	8	6	16	14	22	15
Solyc00g322630.1.1	0	0	0	0	0	0	0	0	0	0
Solyc00g322830.1.1	0	0	0	0	0	0	0	0	0	0
Solyc00g323130.2.1	76	88	104	102	50	43	14	20	27	34
Solyc00g324530.1.1	0	0	0	0	0	0	0	0	0	0
Solyc01g005000.2.1	893	898	633	695	469	468	1405	1702	2555	2573
Solyc01g005010.2.1	210	197	196	213	163	223	5	11	19	28
Solyc01g005020.2.1	1523	1562	1378	1535	1175	1111	780	921	1192	1285
Solyc01g005030.2.1	715	732	631	697	747	783	393	452	536	495
Solyc01g005040.2.1	0	0	1	2	1	0	0	0	0	1
Solyc01g005050.2.1	0	0	0	0	0	0	0	0	0	0
Solyc01g005060.2.1	52	48	60	61	30	27	27	18	45	30
Solyc01g005070.2.1	1	1	3	4	0	1	0	0	0	0
Solyc01g005080.2.1	431	499	387	446	444	447	294	317	377	404
Solyc01g005090.2.1	0	0	0	0	0	0	0	0	0	0
Solyc01g005100.2.1	353	355	333	296	368	376	184	174	237	223
Solyc01g005110.2.1	232	241	180	167	181	165	142	155	199	200
Solyc01g005120.2.1	241	255	238	205	219	172	88	117	227	211
Solyc01g005130.2.1	73	99	77	91	116	132	9	5	12	17
Solyc01g005140.2.1	0	0	0	0	0	0	0	0	0	0
Solyc01g005150.2.1	0	0	0	0	0	0	0	0	0	1
Solyc01g005160.2.1	0	0	0	0	0	0	0	0	0	0
Solyc01g005170.1.1	11	11	7	10	8	9	5	8	14	7
Solyc01g005180.1.1	18	23	20	24	20	20	9	15	12	21
Solyc01g005190.1.1	20	15	10	13	11	13	9	10	15	10
Solyc01g005200.1.1	0	3	2	3	1	6	0	3	2	2
Solyc01g005210.2.1	2064	2150	2052	2140	2964	3021	1856	1902	2689	2610
Solyc01g005220.2.1	1	2	1	0	1	0	0	1	0	0
Solyc01g005230.2.1	1	1	0	0	0	0	1	0	0	0
Solyc01g005240.2.1	1833	1929	1715	1812	1632	1626	1101	1245	1573	1588
Solyc01g005250.2.1	1981	1936	1671	1777	1290	1303	1133	1322	1719	1701
Solyc01g005260.2.1	225	187	150	150	155	157	85	82	121	120
Solyc01g005270.2.1	454	454	369	399	341	358	165	190	235	244
Solyc01g005280.2.1	1537	1566	913	996	1334	1390	301	334	587	523
Solyc01g005290.2.1	3	1	0	2	3	0	1	1	0	5
Solyc01g005300.2.1	480	452	415	451	1021	1100	286	352	483	442
Solyc01g005310.2.1	1	3	0	2	1	0	2	1	0	0
Solyc01g005320.2.1	5	7	5	4	9	9	1	6	7	11
Solyc01g005330.2.1	3491	3735	3290	3467	2749	2771	2337	2502	3294	3184
Solyc01g005340.2.1	289	271	267	269	275	267	159	199	236	233
Solyc01g005350.2.1	2	0	0	1	1	1	0	0	1	2
Solyc01g005360.2.1	0	0	0	0	0	0	0	0	0	0
Solyc01g005370.2.1	33	25	34	29	28	37	13	30	29	19
Solyc01g005380.2.1	408	356	339	332	234	263	227	281	345	338
Solyc01g005390.2.1	0	1	2	0	0	0	1	0	0	1
Solyc01g005400.2.1	0	0	0	0	0	0	0	0	0	0
Solyc01g005410.2.1	4	1	4	2	1	4	3	0	0	3
Solyc01g005420.2.1	0	0	0	0	0	0	0	0	0	0
Solyc01g005430.2.1	144	165	174	173	136	127	109	100	137	136
Solyc01g005440.2.1	3253	3278	2797	2975	4053	4044	1693	1883	2823	2873
Solyc01g005450.2.1	0	0	0	0	0	0	0	2	1	2
Solyc01g005460.2.1	208	241	156	159	157	147	92	96	198	146
Solyc01g005470.2.1	2	0	0	1	0	2	0	0	0	0
Solyc01g005480.2.1	761	782	667	726	568	577	389	447	591	606
Solyc01g005490.2.1	763	772	652	713	597	610	422	525	590	597
Solyc01g005500.2.1	0	0	1	1	0	1	0	0	0	0
Solyc01g005510.2.1	33	34	24	23	36	35	24	16	17	18
Solyc01g005520.2.1	178	212	163	193	130	135	125	159	184	169
Solyc01g005530.2.1	132	138	120	110	67	84	61	90	92	92
Solyc01g005540.2.1	416	424	405	420	291	312	202	242	338	317
Solyc01g005550.2.1	6687	6764	5995	6033	4956	4886	2913	3277	4523	4408
Solyc01g005560.2.1	5198	5513	3994	4129	3222	3379	4298	5008	6293	6294
Solyc01g005570.2.1	437	448	382	437	399	397	252	301	371	362
Solyc01g005580.2.1	559	500	525	500	376	369	423	448	535	519
Solyc01g005590.2.1	70	74	42	60	65	70	41	60	73	68
Solyc01g005600.2.1	1055	1011	798	959	832	865	579	614	841	917
Solyc01g005610.2.1	0	0	0	0	0	0	0	0	0	1
Solyc01g005620.2.1	10503	11008	8199	8848	6426	6507	6838	7735	9162	8983
Solyc01g005630.1.1	0	0	0	0	0	0	0	0	0	0
Solyc01g005640.2.1	385	421	340	395	331	307	210	273	347	337
Solyc01g005650.1.1	0	0	0	0	0	0	0	0	0	0
Solyc01g005660.1.1	0	0	0	0	0	0	0	0	0	0
Solyc01g005670.2.1	141	121	108	109	108	117	86	87	95	93
Solyc01g005680.2.1	0	0	0	0	0	0	0	0	0	0
Solyc01g005690.2.1	781	809	697	773	537	531	424	500	670	641
Solyc01g005700.2.1	821	913	795	742	741	692	550	627	753	733
Solyc01g005710.2.1	0	0	0	0	0	0	0	0	0	0
Solyc01g005720.2.1	2	0	0	0	0	0	0	0	0	1
Solyc01g005730.2.1	1	0	0	0	0	0	0	0	0	0
Solyc01g005740.2.1	0	0	0	0	1	0	0	0	0	0
Solyc01g005750.1.1	0	0	0	0	0	0	0	0	0	0
Solyc01g005760.2.1	0	0	0	0	0	0	0	0	0	0
Solyc01g005770.2.1	5	9	7	4	12	12	5	6	9	8
Solyc01g005780.1.1	0	3	2	1	3	2	2	0	3	1
Solyc01g005790.1.1	359	380	356	379	312	287	174	218	278	254
Solyc01g005800.2.1	133	129	130	95	134	104	121	145	157	139
Solyc01g005810.2.1	1835	1900	1562	1558	1241	1252	1048	1188	1486	1600
Solyc01g005820.2.1	9264	9658	7818	8501	7711	7983	6718	7895	9848	9966
Solyc01g005830.2.1	2188	2226	2015	2090	1406	1433	1241	1363	1896	1957
Solyc01g005840.2.1	155	165	136	176	175	172	112	125	168	164
Solyc01g005850.1.1	31	23	16	27	20	20	13	15	16	19
Solyc01g005860.2.1	3	4	1	3	1	3	2	1	0	2
Solyc01g005870.1.1	1	0	0	0	1	1	0	0	0	0
Solyc01g005880.1.1	1	3	2	0	4	0	1	1	2	1
Solyc01g005890.1.1	1	1	0	0	2	0	0	0	0	0
Solyc01g005900.2.1	28	50	31	40	37	28	28	34	23	26
Solyc01g005910.2.1	141	138	120	124	97	98	85	87	109	115
Solyc01g005920.2.1	63	61	30	37	35	28	25	29	21	45
Solyc01g005930.2.1	47	52	46	47	37	53	34	46	46	38
Solyc01g005940.2.1	5	5	3	1	2	0	2	0	1	1
Solyc01g005950.2.1	745	791	632	642	470	462	435	509	596	582
Solyc01g005960.2.1	5917	6081	4886	5245	4659	4829	3523	3946	5088	4994
Solyc01g005970.2.1	260	311	284	278	231	250	198	217	291	286
Solyc01g005980.2.1	204	212	154	165	163	145	107	131	156	132
Solyc01g005990.2.1	463	503	405	373	227	210	248	270	350	318
Solyc01g006000.2.1	718	802	676	646	597	580	407	456	541	497
Solyc01g006010.2.1	1213	1259	921	969	1081	1139	668	786	976	986
Solyc01g006020.2.1	1080	1094	863	816	1055	1055	535	625	810	844
Solyc01g006030.2.1	419	474	411	409	354	357	271	332	378	422
Solyc01g006040.2.1	339	383	331	330	335	307	221	229	310	269
Solyc01g006050.2.1	0	0	0	0	0	0	0	0	0	0
Solyc01g006060.2.1	1	0	0	0	0	1	0	0	0	0
Solyc01g006070.2.1	0	0	0	0	0	0	0	0	0	0
Solyc01g006080.1.1	7	14	6	9	4	4	7	4	7	11
Solyc01g006090.2.1	142	175	175	170	135	155	146	156	205	174
Solyc01g006100.2.1	6976	7208	5850	5979	4281	4337	3094	3487	4727	4672
Solyc01g006110.2.1	1855	1833	1607	1711	1592	1568	1010	1153	1606	1656
Solyc01g006120.2.1	7280	7715	6631	7257	7226	7417	4499	4972	6067	6175
Solyc01g006130.2.1	176	191	167	185	152	139	114	127	146	121
Solyc01g006140.2.1	377	418	336	362	217	206	266	307	366	373
Solyc01g006150.2.1	1128	1172	890	958	818	824	510	551	700	658
Solyc01g006160.2.1	13094	13572	9460	10629	10421	11604	10378	12256	14920	16257
Solyc01g006170.2.1	1676	1732	1502	1636	999	1011	1192	1343	2011	2004
Solyc01g006180.2.1	723	868	798	815	756	752	497	596	722	712
Solyc01g006190.2.1	5095	5349	4387	4615	4239	4254	2432	2831	3567	3628
Solyc01g006200.2.1	27	32	24	36	31	17	5	4	11	11
Solyc01g006210.2.1	534	503	429	463	377	407	232	293	379	327
Solyc01g006220.2.1	719	674	655	697	577	604	405	514	495	514
Solyc01g006230.2.1	834	894	758	802	748	797	559	678	868	803
Solyc01g006240.2.1	0	0	0	0	1	0	0	0	0	0
Solyc01g006250.1.1	47	58	46	51	41	43	36	41	59	47
Solyc01g006260.2.1	265	327	239	286	281	292	213	231	302	278
Solyc01g006270.2.1	0	0	0	0	0	0	0	0	0	0
Solyc01g006280.2.1	2269	2355	1926	2016	1370	1380	1790	1906	2347	2284
Solyc01g006290.2.1	1	4	1	0	0	1	0	0	0	2
Solyc01g006300.2.1	0	2	0	1	2	3	0	1	0	1
Solyc01g006310.2.1	0	0	0	0	0	0	0	0	0	0
Solyc01g006320.2.1	55	50	45	53	38	30	31	31	32	23
Solyc01g006330.2.1	29	34	36	23	23	20	37	36	31	37
Solyc01g006340.2.1	343	378	348	367	305	325	239	236	295	327
Solyc01g006350.2.1	4849	5082	4331	4627	4135	3989	2770	3046	3944	3939
Solyc01g006360.2.1	1213	1314	1092	1179	1191	1161	578	647	894	849
Solyc01g006370.2.1	22746	23691	19145	20003	16448	16349	11141	12797	16641	16524
Solyc01g006380.2.1	17	19	25	20	17	26	10	13	11	15
Solyc01g006390.2.1	2017	2101	2029	2100	2316	2476	291	347	756	751
Solyc01g006400.2.1	17890	18670	18428	20722	16581	17568	20342	23462	26093	27230
Solyc01g006410.2.1	11	9	13	23	15	23	5	9	13	10
Solyc01g006420.2.1	12	25	6	8	10	9	15	13	23	23
Solyc01g006430.2.1	23537	24433	20981	22168	29509	29565	15863	17403	20997	21313
Solyc01g006440.1.1	0	0	0	0	1	2	0	0	0	0
Solyc01g006450.2.1	2541	2716	2031	2207	1456	1457	1754	2084	2256	2277
Solyc01g006460.1.1	0	0	0	2	0	0	0	0	0	0
Solyc01g006470.1.1	0	0	0	0	0	0	0	0	0	0
Solyc01g006480.2.1	450	434	396	421	290	282	303	297	375	406
Solyc01g006490.2.1	396	388	335	372	360	376	239	281	360	364
Solyc01g006500.2.1	210	217	212	181	202	179	126	173	190	169
Solyc01g006510.2.1	872	856	790	767	1143	1149	630	686	872	833
Solyc01g006520.2.1	50	63	44	49	74	61	36	41	63	64
Solyc01g006530.1.1	0	0	0	0	0	0	0	0	0	0
Solyc01g006540.2.1	44	42	25	19	7	5	11	11	10	10
Solyc01g006550.2.1	0	0	0	0	0	0	0	0	0	0
Solyc01g006560.2.1	1	5	12	17	3	4	1	0	4	2
Solyc01g006570.1.1	0	0	0	0	0	0	0	0	0	0
Solyc01g006580.2.1	0	0	0	0	0	0	0	0	0	0
Solyc01g006590.1.1	0	0	0	0	0	0	0	0	0	0
Solyc01g006600.1.1	0	0	0	0	0	0	0	0	0	0
Solyc01g006610.1.1	0	2	4	8	1	2	0	0	1	2
Solyc01g006620.2.1	0	0	0	0	0	0	0	0	0	0
Solyc01g006630.2.1	1763	1767	1452	1548	1050	1142	900	1045	1366	1335
Solyc01g006640.1.1	0	1	0	0	0	0	0	0	0	0
Solyc01g006650.1.1	132	156	148	166	137	117	123	165	130	135
Solyc01g006660.1.1	131	137	163	147	108	97	3508	4083	2915	2949
Solyc01g006670.2.1	18	16	15	20	16	16	4	18	16	13
Solyc01g006680.2.1	466	503	402	417	637	672	337	383	467	435
Solyc01g006690.2.1	9	10	24	15	5	14	25	18	14	16
Solyc01g006700.2.1	5189	5281	4115	4417	3451	3468	2636	2811	3810	3782
Solyc01g006710.2.1	974	1022	938	924	778	809	651	657	831	855
Solyc01g006720.2.1	0	0	1	0	5	5	1	0	0	2
Solyc01g006730.2.1	11	7	9	8	12	12	4	3	5	3
Solyc01g006740.2.1	943	973	790	796	912	915	393	481	546	458
Solyc01g006750.2.1	0	0	0	0	0	0	0	0	0	0
Solyc01g006760.2.1	0	0	0	0	0	0	0	0	0	0
Solyc01g006770.1.1	0	0	0	0	1	0	0	0	0	0
Solyc01g006780.2.1	130	131	132	146	112	124	38	41	31	22
Solyc01g006790.2.1	401	362	421	465	485	517	113	134	163	175
Solyc01g006800.2.1	3180	3325	2851	2906	2199	2243	1893	2288	2787	2735
Solyc01g006810.2.1	680	689	614	693	563	587	404	510	576	550
Solyc01g006820.2.1	203	241	234	271	193	208	221	244	242	241
Solyc01g006830.2.1	1157	1203	972	1138	974	944	532	601	650	711
Solyc01g006840.2.1	2	2	0	1	0	0	0	1	0	0
Solyc01g006850.1.1	148	140	137	146	113	90	83	93	122	127
Solyc01g006860.2.1	248	267	267	263	274	200	197	220	246	245
Solyc01g006870.2.1	448	463	456	463	426	408	255	345	378	431
Solyc01g006880.2.1	1056	1110	981	1033	1066	1103	575	619	847	772
Solyc01g006890.2.1	1888	1913	1921	2026	2093	2109	1021	1099	1482	1463
Solyc01g006900.2.1	9601	9878	7756	8071	8309	8207	3019	3393	4314	4339
Solyc01g006910.2.1	1	3	0	2	1	2	2	2	1	0
Solyc01g006920.2.1	72	73	83	75	57	84	40	53	58	51
Solyc01g006930.2.1	488	493	446	444	604	622	52	75	107	98
Solyc01g006940.2.1	473	530	415	424	368	316	270	316	421	423
Solyc01g006950.2.1	2	6	4	5	3	2	3	3	9	1
Solyc01g006960.2.1	1316	1379	1229	1273	1170	1160	681	815	1004	1033
Solyc01g006970.2.1	1445	1596	1417	1487	1504	1453	866	1009	1276	1284
Solyc01g006980.2.1	1566	1635	1390	1455	1018	1006	1211	1366	1647	1581
Solyc01g006990.2.1	382	424	372	392	476	463	224	234	336	332
Solyc01g007000.2.1	0	0	0	0	0	0	3	0	0	0
Solyc01g007010.2.1	0	0	0	0	0	0	0	0	0	0
Solyc01g007020.2.1	1	1	0	0	2	0	0	0	0	0
Solyc01g007030.2.1	0	0	0	0	0	0	1	1	0	0
Solyc01g007040.2.1	0	0	0	0	0	0	0	0	0	0
Solyc01g007050.1.1	0	0	0	1	2	0	0	0	0	1
Solyc01g007060.2.1	1053	1080	938	988	714	790	711	782	934	905
Solyc01g007070.2.1	42	37	60	69	77	73	65	86	95	101
Solyc01g007080.2.1	1	0	2	0	5	3	6	2	0	2
Solyc01g007090.1.1	0	0	0	0	0	0	1	0	0	0
Solyc01g007100.2.1	750	760	771	800	745	764	569	635	887	886
Solyc01g007110.2.1	1246	1351	1502	1531	1333	1390	989	1014	1391	1428
Solyc01g007120.2.1	792	784	701	714	582	632	456	509	696	652
Solyc01g007130.2.1	1121	1187	1008	1075	951	958	499	565	777	783
Solyc01g007140.2.1	521	508	460	464	374	324	309	343	444	479
Solyc01g007150.2.1	3029	3177	2644	2694	1811	1869	1638	1741	2451	2351
Solyc01g007160.2.1	392	375	383	354	257	255	227	233	320	292
Solyc01g007170.2.1	3012	3179	2810	3141	2471	2744	2364	2676	3319	3507
Solyc01g007180.2.1	72	100	58	87	81	91	62	52	65	84
Solyc01g007190.2.1	69	65	54	47	45	42	31	33	53	51
Solyc01g007200.2.1	2289	2326	1764	1895	1726	1811	1138	1306	945	981
Solyc01g007210.2.1	0	0	0	0	0	0	0	0	0	0
Solyc01g007220.2.1	2	2	0	0	1	5	3	1	1	4
Solyc01g007230.2.1	159	161	150	160	115	114	118	124	146	159
Solyc01g007240.2.1	2	0	2	1	1	0	1	1	5	0
Solyc01g007250.2.1	345	404	270	337	253	234	255	338	415	379
Solyc01g007260.2.1	4	6	3	6	3	2	1	4	1	1
Solyc01g007270.1.1	93	70	78	103	131	152	99	123	174	162
Solyc01g007280.2.1	17	31	11	26	19	17	4	5	9	11
Solyc01g007290.1.1	17	16	5	6	6	5	2	3	3	3
Solyc01g007300.1.1	18	15	3	5	5	4	8	8	8	8
Solyc01g007310.2.1	5	5	5	2	1	1	4	2	5	1
Solyc01g007320.2.1	11607	12179	7283	7681	6790	6627	8221	9446	8813	8768
Solyc01g007330.2.1	1048	1086	153	162	162	165	143	163	157	141
Solyc01g007340.2.1	14	13	3	11	9	6	2	3	8	7
Solyc01g007350.2.1	7	10	3	3	2	7	2	2	4	2
Solyc01g007360.2.1	6	9	2	3	3	4	1	1	4	2
Solyc01g007370.2.1	7	8	5	4	4	3	3	0	6	7
Solyc01g007380.1.1	28	19	10	14	19	15	11	10	12	14
Solyc01g007390.1.1	3	1	1	1	1	1	1	0	1	0
Solyc01g007400.1.1	43	39	20	22	20	24	14	16	29	36
Solyc01g007410.2.1	74	90	40	55	47	46	38	30	53	40
Solyc01g007420.2.1	2	2	0	0	1	1	0	2	1	1
Solyc01g007430.2.1	16	25	14	6	10	10	18	19	17	14
Solyc01g007440.1.1	3	2	1	0	0	0	0	0	0	0
Solyc01g007450.1.1	2	0	0	0	0	0	0	0	2	1
Solyc01g007460.2.1	7	5	7	4	1	3	1	5	5	2
Solyc01g007470.1.1	9	9	2	2	4	6	5	2	8	6
Solyc01g007480.1.1	9	10	5	5	13	5	10	12	12	11
Solyc01g007490.2.1	515	562	248	273	329	318	271	313	350	296
Solyc01g007500.2.1	165	185	47	39	44	41	42	30	35	44
Solyc01g007510.1.1	0	0	0	0	0	0	0	0	0	0
Solyc01g007520.2.1	12	12	4	3	4	2	1	1	7	3
Solyc01g007530.2.1	56	60	21	15	18	16	17	11	3	8
Solyc01g007540.2.1	10	13	6	3	2	3	4	4	4	4
Solyc01g007550.1.1	0	0	0	0	0	1	0	1	1	0
Solyc01g007560.2.1	2	3	2	1	3	1	3	3	3	4
Solyc01g007570.2.1	14	17	7	7	8	13	15	14	20	11
Solyc01g007580.2.1	0	0	0	0	0	0	0	0	0	0
Solyc01g007590.2.1	0	0	0	0	0	0	0	0	0	0
Solyc01g007600.2.1	87	64	34	47	37	45	29	49	48	51
Solyc01g007610.2.1	251	246	85	85	90	101	140	119	122	133
Solyc01g007620.2.1	0	0	0	0	0	0	0	0	0	0
Solyc01g007630.2.1	2571	2654	1355	1416	1929	1973	2016	2439	1804	1787
Solyc01g007640.2.1	68	55	38	44	41	43	32	32	46	47
Solyc01g007650.2.1	2	3	0	2	1	0	1	0	5	1
Solyc01g007660.2.1	15	28	11	4	8	6	11	7	15	10
Solyc01g007670.2.1	79	80	54	71	57	58	67	59	75	77
Solyc01g007680.1.1	4	7	1	1	2	1	3	1	1	1
Solyc01g007690.2.1	361	378	25	25	24	26	21	30	34	35
Solyc01g007700.2.1	3016	3079	102	117	56	51	39	50	65	95
Solyc01g007710.2.1	11483	11459	732	827	314	373	260	325	518	535
Solyc01g007720.2.1	193	207	57	59	40	42	56	63	76	95
Solyc01g007730.2.1	11595	11725	890	964	493	505	437	457	606	658
Solyc01g007740.2.1	864	963	762	779	537	546	560	594	725	722
Solyc01g007750.2.1	284	259	228	268	327	284	174	187	250	233
Solyc01g007760.2.1	1469	1560	1265	1300	1027	1080	799	932	1134	1138
Solyc01g007770.2.1	28	36	45	31	40	40	38	35	51	37
Solyc01g007780.2.1	54	57	48	47	67	66	43	53	60	58
Solyc01g007790.2.1	167	215	149	153	169	171	109	131	163	148
Solyc01g007800.2.1	502	563	340	361	491	538	363	407	491	577
Solyc01g007810.1.1	118	134	82	77	61	82	77	90	93	86
Solyc01g007820.1.1	11	15	14	30	19	17	15	19	16	8
Solyc01g007830.1.1	3	7	12	7	6	5	4	3	5	6
Solyc01g007840.2.1	946	916	699	797	999	983	581	633	828	880
Solyc01g007850.2.1	420	456	388	434	306	303	248	263	375	346
Solyc01g007860.2.1	6687	6879	5479	5795	4977	5008	3624	4030	5126	4814
Solyc01g007870.2.1	2818	2974	1802	1962	2052	2034	1461	1630	2176	2195
Solyc01g007880.2.1	447	425	374	425	408	380	272	267	374	367
Solyc01g007890.1.1	16	14	14	20	14	9	17	14	6	10
Solyc01g007900.2.1	721	722	566	627	558	542	411	453	491	538
Solyc01g007910.2.1	3027	3212	2451	2601	1837	1944	2091	2354	3091	3045
Solyc01g007920.2.1	154	159	143	148	209	188	162	129	218	220
Solyc01g007930.2.1	357	417	358	397	618	600	274	333	441	479
Solyc01g007940.2.1	10	5	11	14	6	7	4	1	3	2
Solyc01g007950.2.1	435	433	408	405	279	288	229	223	291	300
Solyc01g007960.2.1	13	14	22	13	16	17	9	4	5	2
Solyc01g007970.1.1	2	1	0	3	2	1	0	1	0	0
Solyc01g007980.2.1	0	0	0	0	1	2	1	0	1	0
Solyc01g007990.2.1	302	315	257	246	285	273	170	161	217	224
Solyc01g008000.2.1	7147	7358	6035	6641	6403	6405	3846	4397	5664	5708
Solyc01g008010.2.1	332	301	247	265	200	245	161	198	235	227
Solyc01g008020.2.1	802	893	758	816	794	832	505	614	774	696
Solyc01g008030.2.1	0	1	0	0	0	2	0	0	0	0
Solyc01g008040.1.1	19	20	11	17	11	14	7	7	13	16
Solyc01g008050.2.1	4	7	4	4	0	2	3	0	0	2
Solyc01g008060.2.1	1897	2028	1670	1863	1750	1753	1195	1398	1892	1787
Solyc01g008070.2.1	298	357	300	317	355	407	152	155	216	233
Solyc01g008080.2.1	8289	8625	5872	6185	6427	6684	4238	4870	6984	6993
Solyc01g008090.2.1	5277	5162	3666	4286	6286	6501	5027	5753	8314	8574
Solyc01g008100.2.1	574	649	613	653	598	554	439	556	498	531
Solyc01g008110.2.1	19409	19795	20186	21617	12909	12899	7871	8904	8275	8304
Solyc01g008120.2.1	3345	3436	3318	3368	2941	3058	1877	2157	2802	2759
Solyc01g008130.2.1	107	115	117	123	93	88	80	77	106	126
Solyc01g008140.2.1	631	640	564	566	517	540	384	473	513	554
Solyc01g008150.1.1	4	9	7	11	13	13	5	9	10	6
Solyc01g008160.2.1	435	436	391	465	315	319	306	376	443	412
Solyc01g008170.2.1	1753	1760	1650	1915	1541	1608	968	1170	1469	1503
Solyc01g008180.2.1	2695	2669	2404	2595	2522	2575	1211	1375	1736	1677
Solyc01g008190.2.1	197	189	190	228	228	252	144	173	206	202
Solyc01g008200.2.1	196	198	139	154	162	181	116	151	161	154
Solyc01g008210.2.1	187	225	205	214	193	220	177	177	184	152
Solyc01g008220.2.1	30	46	29	36	22	31	12	20	28	23
Solyc01g008230.2.1	1083	1028	1006	1089	972	1019	730	790	1052	1045
Solyc01g008240.2.1	0	1	0	0	0	0	0	0	0	0
Solyc01g008250.2.1	185	206	152	153	192	182	168	160	194	211
Solyc01g008260.2.1	235	289	223	255	170	186	153	209	237	219
Solyc01g008270.2.1	1410	1460	1157	1222	874	927	840	1008	1269	1199
Solyc01g008280.2.1	1699	1825	1277	1460	1229	1378	915	1020	1424	1409
Solyc01g008290.2.1	720	706	635	712	504	491	472	527	712	680
Solyc01g008300.1.1	2	6	8	6	2	6	3	9	8	7
Solyc01g008310.2.1	3144	3225	2634	2822	1915	1862	1856	2218	2693	2684
Solyc01g008320.2.1	1029	1016	840	909	978	1007	595	695	928	898
Solyc01g008330.2.1	2744	2932	2268	2492	1491	1486	1631	1860	2371	2395
Solyc01g008340.2.1	788	766	657	729	528	455	455	566	719	710
Solyc01g008350.2.1	18	9	10	10	9	13	8	9	11	8
Solyc01g008360.2.1	93	95	53	62	66	78	48	60	80	62
Solyc01g008370.2.1	7371	7858	5910	6115	5398	5301	4537	5178	6253	6169
Solyc01g008380.1.1	7	4	6	6	9	4	7	2	4	6
Solyc01g008390.1.1	0	1	0	0	2	1	1	0	2	0
Solyc01g008400.2.1	2	4	0	0	0	4	0	4	0	0
Solyc01g008410.1.1	8	5	6	7	10	8	9	16	17	9
Solyc01g008420.2.1	25	24	34	29	18	31	8	9	15	16
Solyc01g008430.1.1	0	0	0	0	0	0	0	0	0	0
Solyc01g008440.2.1	337	334	283	303	374	342	244	255	331	320
Solyc01g008450.1.1	1	1	0	1	0	1	0	1	0	0
Solyc01g008460.2.1	488	488	369	400	381	389	316	316	429	487
Solyc01g008470.2.1	727	778	626	665	647	630	474	544	669	752
Solyc01g008480.2.1	218	199	147	156	167	148	108	103	123	132
Solyc01g008490.2.1	212	222	190	197	255	244	130	159	199	162
Solyc01g008500.2.1	8	5	3	5	7	7	3	4	6	0
Solyc01g008510.2.1	1	0	0	0	0	0	1	0	1	1
Solyc01g008520.2.1	142	136	110	130	150	166	91	110	117	103
Solyc01g008530.2.1	422	444	386	422	394	398	155	182	181	186
Solyc01g008540.2.1	0	1	0	1	0	0	0	0	0	1
Solyc01g008550.2.1	3766	3844	3605	3764	3151	3116	1731	1952	2580	2580
Solyc01g008560.2.1	506	508	505	494	448	407	336	407	499	442
Solyc01g008570.1.1	0	0	0	0	0	0	0	0	0	0
Solyc01g008580.1.1	0	0	0	0	0	0	0	0	0	0
Solyc01g008590.1.1	0	0	0	0	0	0	0	0	0	0
Solyc01g008600.2.1	6347	6637	6093	6564	5941	5959	4114	4591	6113	5952
Solyc01g008610.2.1	0	0	0	0	0	0	0	0	0	0
Solyc01g008620.2.1	0	0	0	0	0	0	0	0	0	0
Solyc01g008640.2.1	3	2	3	3	0	0	2	1	0	0
Solyc01g008650.2.1	3	3	8	1	2	1	6	3	5	6
Solyc01g008660.2.1	586	580	519	522	581	597	313	373	561	549
Solyc01g008670.2.1	12	19	10	8	0	1	4	6	8	13
Solyc01g008680.2.1	48	47	29	40	26	28	28	31	37	40
Solyc01g008690.2.1	0	0	0	0	0	0	0	0	0	0
Solyc01g008700.2.1	431	459	397	365	313	313	219	260	312	366
Solyc01g008710.2.1	0	0	0	0	0	0	0	0	0	0
Solyc01g008720.1.1	0	0	0	0	0	0	0	0	0	0
Solyc01g008730.2.1	448	493	418	439	420	485	293	397	405	385
Solyc01g008740.1.1	0	0	0	0	0	0	0	0	0	0
Solyc01g008750.1.1	0	1	0	1	0	0	0	1	0	0
Solyc01g008760.2.1	14	11	8	11	13	8	8	7	8	8
Solyc01g008770.2.1	3096	3246	2729	2938	2678	2817	1631	1807	2404	2277
Solyc01g008780.2.1	696	731	509	565	704	699	328	377	482	466
Solyc01g008790.2.1	48	51	58	48	52	62	49	72	76	79
Solyc01g008800.1.1	7	17	8	14	3	9	8	4	3	10
Solyc01g008810.2.1	1449	1460	1204	1140	1291	1308	764	890	1036	1076
Solyc01g008820.2.1	1491	1619	1475	1453	1064	1077	1032	1208	1487	1507
Solyc01g008830.1.1	0	2	0	0	0	0	0	0	0	0
Solyc01g008840.2.1	1032	1008	847	886	762	767	515	602	825	781
Solyc01g008850.2.1	42	33	41	63	26	20	28	41	39	41
Solyc01g008860.1.1	2	0	0	1	0	1	14	29	17	13
Solyc01g008870.1.1	0	0	0	0	0	0	0	0	0	0
Solyc01g008880.1.1	0	1	0	0	0	1	0	0	0	0
Solyc01g008890.2.1	672	655	508	550	592	610	347	424	495	510
Solyc01g008900.2.1	287	308	268	279	238	247	171	201	280	232
Solyc01g008910.2.1	164	148	197	179	224	239	341	384	462	407
Solyc01g008920.2.1	108	117	80	99	105	98	58	80	88	95
Solyc01g008930.2.1	517	605	456	454	432	397	301	374	514	488
Solyc01g008940.2.1	0	0	0	0	0	0	0	1	0	0
Solyc01g008950.2.1	7910	8204	6357	6420	5924	5859	3945	4392	6056	5927
Solyc01g008960.2.1	61078	62629	52675	54557	70266	69957	27245	31160	46524	46412
Solyc01g008970.2.1	13935	14508	13267	14377	12339	12955	9953	11328	14221	14559
Solyc01g008980.2.1	174	192	143	174	173	165	121	135	128	141
Solyc01g008990.2.1	814	821	681	728	536	507	526	558	614	635
Solyc01g009000.2.1	661	686	657	703	623	634	444	532	699	698
Solyc01g009010.2.1	377	391	334	366	288	332	246	299	341	345
Solyc01g009020.2.1	551	597	435	443	455	426	342	386	515	530
Solyc01g009030.2.1	2321	2397	1989	2095	1787	1760	1287	1342	1738	1790
Solyc01g009040.2.1	4335	4467	3320	3483	2524	2466	1994	2313	3067	3081
Solyc01g009050.2.1	2463	2528	2166	2289	2311	2362	1334	1546	1872	1975
Solyc01g009060.2.1	1538	1591	1284	1344	1453	1424	893	1005	1257	1257
Solyc01g009070.2.1	607	649	544	572	518	536	314	338	419	374
Solyc01g009080.2.1	20	27	50	35	33	35	40	30	54	54
Solyc01g009090.2.1	5388	5701	5022	5465	5256	5574	3507	3976	5211	5163
Solyc01g009100.2.1	4963	5132	3615	3798	2253	2394	3700	4163	5055	5241
Solyc01g009110.2.1	113	109	92	99	105	118	67	72	86	87
Solyc01g009120.2.1	35	33	28	33	30	34	15	18	15	36
Solyc01g009130.1.1	0	0	0	0	0	0	0	0	0	0
Solyc01g009140.1.1	0	0	0	0	0	0	0	0	0	0
Solyc01g009150.2.1	316	301	280	316	281	260	188	225	281	294
Solyc01g009160.2.1	39	31	66	76	36	40	30	37	37	33
Solyc01g009170.2.1	2547	2674	2156	2398	2366	2445	1104	1319	1655	1702
Solyc01g009180.2.1	1972	2135	1717	1837	1498	1536	1392	1555	2069	2216
Solyc01g009190.1.1	1	0	0	0	2	2	0	0	1	2
Solyc01g009200.2.1	0	0	0	0	0	0	0	0	0	0
Solyc01g009210.1.1	0	0	0	0	0	0	0	0	0	0
Solyc01g009220.2.1	0	0	0	0	0	0	0	0	0	0
Solyc01g009230.2.1	506	497	407	473	338	315	292	296	340	349
Solyc01g009240.2.1	60	69	50	62	69	70	27	29	32	33
Solyc01g009250.2.1	4	4	3	2	5	3	1	3	7	8
Solyc01g009260.1.1	0	0	0	0	0	0	0	0	0	0
Solyc01g009270.1.1	0	0	0	0	0	0	0	0	0	0
Solyc01g009280.2.1	1447	1556	1435	1382	1703	1690	1087	1211	1549	1617
Solyc01g009290.2.1	1273	1347	1197	1241	1064	1122	869	994	1285	1270
Solyc01g009300.2.1	775	808	682	698	642	609	597	685	1111	1029
Solyc01g009310.2.1	2791	2918	2402	2493	1945	2031	1167	1396	1869	1877
Solyc01g009320.1.1	0	0	0	0	0	0	0	0	0	0
Solyc01g009330.1.1	3	0	1	1	1	1	0	0	0	0
Solyc01g009340.2.1	153	166	218	189	121	127	34	41	52	50
Solyc01g009350.2.1	2	0	3	1	2	3	1	2	0	1
Solyc01g009360.1.1	1	1	1	0	0	1	0	0	0	1
Solyc01g009370.1.1	0	0	1	0	1	0	3	10	4	4
Solyc01g009380.2.1	801	797	580	592	596	619	358	436	529	521
Solyc01g009390.2.1	395	416	334	341	350	392	205	284	331	340
Solyc01g009400.2.1	0	0	0	0	1	0	0	0	0	0
Solyc01g009410.2.1	0	0	0	1	0	0	0	0	0	0
Solyc01g009420.2.1	4607	4858	4296	4547	3716	3837	3203	3373	4236	4162
Solyc01g009430.2.1	47	70	58	87	68	88	56	63	66	87
Solyc01g009440.1.1	0	1	0	0	0	1	0	0	1	0
Solyc01g009450.2.1	1231	1284	1021	1054	1016	1061	819	938	1050	1020
Solyc01g009460.2.1	0	0	0	0	0	0	0	0	0	0
Solyc01g009470.1.1	0	1	1	2	1	1	0	1	0	3
Solyc01g009480.2.1	0	0	0	0	0	0	0	0	0	0
Solyc01g009490.1.1	0	0	0	0	0	0	0	0	0	0
Solyc01g009500.2.1	76	58	68	67	49	55	47	49	58	76
Solyc01g009510.1.1	0	0	0	0	0	0	0	0	0	0
Solyc01g009520.2.1	4954	4966	4060	4270	2785	2994	3027	3461	4797	4754
Solyc01g009530.1.1	0	0	0	0	0	1	0	0	1	1
Solyc01g009540.1.1	0	0	0	0	0	0	0	0	0	0
Solyc01g009550.1.1	3	9	2	3	3	3	4	2	1	1
Solyc01g009560.1.1	0	0	0	0	0	0	0	0	0	0
Solyc01g009570.2.1	12	13	15	13	12	12	5	5	7	4
Solyc01g009580.1.1	0	0	0	0	0	0	0	0	0	0
Solyc01g009590.2.1	0	0	0	0	0	0	0	0	0	0
Solyc01g009600.2.1	0	0	0	0	0	0	1	0	0	0
Solyc01g009610.2.1	370	364	295	308	289	302	195	243	287	279
Solyc01g009620.2.1	1057	1060	776	801	805	733	530	638	789	752
Solyc01g009630.2.1	1032	1030	768	812	896	869	522	571	729	715
Solyc01g009640.1.1	0	0	0	0	0	0	0	0	0	0
Solyc01g009650.1.1	0	0	0	0	0	0	0	0	0	0
Solyc01g009660.1.1	0	0	0	0	0	0	0	0	0	0
Solyc01g009670.2.1	282	283	216	231	193	193	138	164	238	237
Solyc01g009680.2.1	0	0	0	0	0	0	0	0	0	0
Solyc01g009690.1.1	0	0	1	0	0	0	0	0	0	0
Solyc01g009700.1.1	1	0	0	0	0	0	0	0	0	0
Solyc01g009710.1.1	0	0	0	0	0	0	0	0	0	0
Solyc01g009720.1.1	40	32	29	35	25	29	23	14	31	32
Solyc01g009730.1.1	0	1	0	0	0	0	0	0	0	0
Solyc01g009740.1.1	0	0	0	0	0	0	0	0	0	0
Solyc01g009750.2.1	2347	2421	1755	1904	2016	2081	1534	1701	2238	2313
Solyc01g009760.2.1	96	101	79	85	51	47	34	53	58	59
Solyc01g009770.2.1	523	519	413	410	373	366	257	264	457	456
Solyc01g009780.2.1	230	253	196	227	231	228	119	168	221	227
Solyc01g009790.1.1	0	0	0	0	0	0	0	0	0	0
Solyc01g009800.1.1	0	0	0	0	0	0	0	0	0	0
Solyc01g009810.2.1	0	0	0	0	0	0	0	0	0	0
Solyc01g009820.2.1	883	924	914	923	682	757	457	508	639	610
Solyc01g009830.2.1	0	0	0	0	0	0	0	0	0	0
Solyc01g009840.1.1	2	2	0	0	0	0	0	0	0	0
Solyc01g009850.2.1	1894	1966	1397	1499	1164	1234	1250	1313	1784	1752
Solyc01g009860.2.1	291	295	268	316	188	202	142	151	176	188
Solyc01g009870.2.1	0	0	0	2	0	0	0	0	1	0
Solyc01g009880.2.1	0	0	0	0	0	0	0	0	0	0
Solyc01g009890.1.1	0	6	4	6	1	0	0	0	4	0
Solyc01g009900.2.1	17	18	19	18	6	4	3	3	3	3
Solyc01g009910.1.1	4	4	5	9	3	1	0	4	0	0
Solyc01g009920.1.1	0	0	0	0	0	0	0	0	0	0
Solyc01g009930.1.1	0	0	0	0	0	0	0	0	0	0
Solyc01g009940.1.1	2	1	2	3	1	1	0	1	0	1
Solyc01g009950.1.1	0	0	0	1	0	1	0	0	0	0
Solyc01g009960.2.1	0	0	0	0	0	0	0	0	0	0
Solyc01g009970.2.1	161	155	110	139	148	110	128	136	159	160
Solyc01g009980.1.1	5	4	3	3	1	1	2	0	4	1
Solyc01g009990.2.1	3285	3341	2852	3072	1987	1995	2254	2625	3029	3013
Solyc01g010000.2.1	114	144	92	105	65	66	82	87	156	158
Solyc01g010010.1.1	0	0	0	0	0	0	0	0	0	0
Solyc01g010020.2.1	171	181	147	144	161	158	43	61	63	76
Solyc01g010030.2.1	1188	1226	1150	1211	1094	1128	883	998	1318	1276
Solyc01g010040.2.1	0	0	0	0	0	0	0	0	0	0
Solyc01g010050.2.1	0	0	0	0	0	0	0	0	0	0
Solyc01g010060.2.1	26	19	15	20	28	22	6	13	16	21
Solyc01g010070.1.1	0	0	0	0	0	0	0	0	0	0
Solyc01g010080.2.1	0	1	0	0	0	0	0	0	1	0
Solyc01g010090.1.1	0	0	0	0	0	0	0	0	0	0
Solyc01g010100.1.1	0	0	0	0	0	0	0	0	0	0
Solyc01g010110.1.1	1	1	0	0	0	1	1	0	0	1
Solyc01g010120.1.1	0	0	0	0	0	0	0	0	0	0
Solyc01g010130.2.1	797	997	847	934	1168	1225	1852	2204	3262	3202
Solyc01g010140.1.1	0	0	0	0	0	0	0	0	0	1
Solyc01g010150.2.1	2249	2331	2228	2249	3501	3331	4655	5236	7164	7131
Solyc01g010160.2.1	0	0	0	0	0	1	1	0	0	1
Solyc01g010170.1.1	0	0	0	0	0	0	0	0	0	0
Solyc01g010180.2.1	132	128	98	91	97	106	69	96	82	89
Solyc01g010190.2.1	83	70	68	75	64	70	63	55	83	85
Solyc01g010200.2.1	17	16	18	15	7	15	19	19	18	28
Solyc01g010210.1.1	0	0	0	0	0	0	0	0	0	0
Solyc01g010220.2.1	70	88	30	43	44	56	58	68	96	78
Solyc01g010230.2.1	1	0	0	0	1	1	0	0	0	1
Solyc01g010240.2.1	103	121	83	90	44	31	3	6	0	0
Solyc01g010250.2.1	62	78	80	100	147	140	65	41	43	38
Solyc01g010260.2.1	0	0	0	0	0	0	0	0	0	0
Solyc01g010270.2.1	715	735	549	627	521	571	417	528	464	529
Solyc01g010280.2.1	1	0	4	3	10	6	1	0	0	0
Solyc01g010290.2.1	286	272	214	211	305	326	249	241	240	246
Solyc01g010300.1.1	0	0	0	1	0	0	0	0	0	0
Solyc01g010310.2.1	3330	3402	2699	2956	2493	2504	1977	2300	2954	2982
Solyc01g010320.1.1	0	0	0	0	0	0	0	0	0	0
Solyc01g010330.1.1	0	0	0	0	0	0	0	0	0	0
Solyc01g010340.1.1	0	0	0	0	0	0	0	0	0	0
Solyc01g010350.2.1	3	2	2	1	5	2	0	2	0	1
Solyc01g010360.2.1	0	0	0	0	0	0	0	0	0	0
Solyc01g010370.2.1	535	561	492	506	443	429	345	350	451	467
Solyc01g010380.2.1	0	0	0	0	0	0	0	0	0	0
Solyc01g010390.2.1	70	95	103	97	61	44	61	58	62	59
Solyc01g010400.1.1	0	0	0	0	0	0	0	0	0	0
Solyc01g010410.2.1	8	9	15	8	5	5	11	11	5	7
Solyc01g010420.2.1	0	0	0	0	0	0	0	0	0	0
Solyc01g010430.2.1	13	14	17	11	7	7	5	11	12	5
Solyc01g010440.2.1	3428	3581	3414	3607	3504	3578	2777	3151	3758	3759
Solyc01g010450.1.1	0	0	0	0	0	0	0	0	0	0
Solyc01g010460.2.1	161	176	166	128	111	123	80	93	122	118
Solyc01g010470.2.1	222	204	168	168	178	163	113	139	153	126
Solyc01g010480.2.1	1	2	7	6	1	2	5	6	2	2
Solyc01g010490.2.1	0	0	0	0	0	0	0	0	0	0
Solyc01g010500.1.1	0	0	0	0	0	0	0	0	0	0
Solyc01g010510.2.1	99	101	91	104	75	73	69	105	94	95
Solyc01g010520.2.1	804	881	710	779	689	744	571	691	752	752
Solyc01g010530.1.1	0	0	0	0	0	1	0	0	0	0
Solyc01g010540.2.1	3622	3748	2953	2974	2379	2354	2613	2715	4343	4159
Solyc01g010550.1.1	0	0	2	2	2	0	0	0	0	0
Solyc01g010570.2.1	305	337	258	264	226	271	166	188	247	218
Solyc01g010580.2.1	5445	6371	4403	4724	4316	4484	3956	4702	6545	6415
Solyc01g010590.2.1	813	849	705	752	547	553	499	559	704	699
Solyc01g010600.2.1	10	4	21	10	9	12	10	9	20	26
Solyc01g010610.1.1	0	0	0	0	0	0	0	0	0	0
Solyc01g010630.1.1	0	0	0	0	1	0	0	0	0	0
Solyc01g010640.2.1	265	294	220	247	248	278	174	216	254	230
Solyc01g010650.2.1	559	564	474	534	645	594	350	347	437	435
Solyc01g010660.2.1	600	697	600	620	564	527	366	380	536	541
Solyc01g010670.1.1	0	0	0	0	0	0	0	0	0	0
Solyc01g010680.1.1	0	0	0	0	0	0	0	1	0	0
Solyc01g010690.1.1	0	0	0	0	0	0	0	0	0	0
Solyc01g010700.2.1	86	83	69	59	51	68	31	58	35	36
Solyc01g010710.2.1	7	11	7	4	2	6	56	39	37	38
Solyc01g010720.2.1	0	1	2	4	6	0	15	15	7	10
Solyc01g010730.1.1	0	2	0	0	0	0	0	1	3	3
Solyc01g010740.2.1	2	1	0	0	0	0	0	0	1	0
Solyc01g010750.2.1	3286	3355	2822	2942	3276	3464	2361	2711	3451	3586
Solyc01g010760.2.1	6694	6865	5507	5862	4759	4804	4778	5455	6742	6517
Solyc01g010770.2.1	6	5	7	6	7	7	5	9	13	11
Solyc01g010780.2.1	1700	1763	1389	1471	1494	1536	794	910	1230	1217
Solyc01g010790.1.1	0	0	0	0	0	0	0	0	0	0
Solyc01g010800.1.1	0	0	0	0	0	0	0	0	0	0
Solyc01g010810.2.1	545	592	470	517	370	404	419	474	490	466
Solyc01g010820.2.1	1679	1677	1493	1546	1384	1358	1101	1286	1711	1578
Solyc01g010830.2.1	271	287	240	259	243	250	241	281	312	325
Solyc01g010840.1.1	0	0	0	0	0	0	0	0	0	0
Solyc01g010850.1.1	0	0	0	0	0	0	0	0	0	0
Solyc01g010860.2.1	189	226	146	168	181	164	114	129	146	149
Solyc01g010870.2.1	1443	1582	1276	1294	1110	1164	707	795	1095	1105
Solyc01g010880.2.1	361	407	376	363	443	458	217	240	304	273
Solyc01g010890.2.1	0	0	0	0	0	0	0	0	0	0
Solyc01g010900.2.1	0	0	0	0	0	0	0	0	0	0
Solyc01g010910.1.1	24	13	22	24	7	16	2	2	5	3
Solyc01g010920.1.1	97	103	74	94	109	100	55	68	103	90
Solyc01g010930.2.1	132	143	150	139	120	138	95	100	129	152
Solyc01g010940.2.1	564	631	476	522	358	357	339	360	543	479
Solyc01g010950.2.1	322	322	287	288	364	374	241	244	255	268
Solyc01g010960.1.1	409	417	448	470	201	200	229	175	553	530
Solyc01g010970.2.1	938	966	858	915	1102	1107	1070	1230	1068	1072
Solyc01g010980.1.1	0	0	0	0	0	0	0	0	0	0
Solyc01g010990.2.1	223	222	219	247	239	205	145	157	182	202
Solyc01g011000.2.1	7506	7739	5916	6138	3690	3726	4835	5441	7285	7266
Solyc01g011010.2.1	0	0	0	0	0	0	0	0	0	0
Solyc01g011020.1.1	0	0	0	0	0	0	0	0	0	0
Solyc01g011030.2.1	620	600	515	586	540	524	439	463	523	515
Solyc01g011040.2.1	1752	1787	1460	1560	1158	1163	1024	1076	1393	1358
Solyc01g011050.2.1	0	0	0	0	0	0	0	0	0	0
Solyc01g011060.1.1	2	1	2	0	2	1	0	4	0	1
Solyc01g011070.1.1	2	3	2	2	3	6	1	6	3	2
Solyc01g011080.2.1	22	19	10	13	23	40	19	16	24	24
Solyc01g011090.2.1	187	170	154	151	146	149	77	91	118	144
Solyc01g011100.2.1	1512	1613	1380	1408	1331	1304	660	789	1092	1101
Solyc01g011110.1.1	0	0	0	0	0	0	0	0	0	0
Solyc01g011130.1.1	0	3	2	4	1	2	2	3	2	0
Solyc01g011150.1.1	0	0	0	0	0	0	0	0	0	0
Solyc01g011170.1.1	0	0	0	0	0	0	0	0	0	0
Solyc01g011180.1.1	10	11	14	8	9	10	10	3	10	6
Solyc01g011190.1.1	11	5	8	7	0	6	3	0	4	3
Solyc01g011200.2.1	83	91	51	53	54	50	47	42	61	57
Solyc01g011220.1.1	88	106	89	89	100	90	48	66	94	108
Solyc01g011230.2.1	36	30	31	35	36	50	21	33	33	30
Solyc01g011240.1.1	0	0	0	0	0	0	0	0	0	0
Solyc01g011250.1.1	0	0	0	0	0	0	0	0	0	0
Solyc01g011260.1.1	0	3	0	0	1	1	1	0	0	0
Solyc01g011270.1.1	0	0	0	0	0	0	0	0	0	0
Solyc01g011280.1.1	0	0	0	0	0	0	0	0	0	0
Solyc01g011290.1.1	0	0	0	0	0	0	0	0	0	0
Solyc01g011300.1.1	2	4	3	4	8	8	6	3	8	4
Solyc01g011310.1.1	4	2	1	3	4	3	1	2	3	2
Solyc01g011320.1.1	3	2	1	3	3	5	2	3	4	3
Solyc01g011330.1.1	4	2	4	3	4	3	2	4	5	7
Solyc01g011340.2.1	1378	1416	1188	1262	1064	1127	909	1031	1161	1130
Solyc01g011350.2.1	712	752	592	638	574	596	379	453	503	472
Solyc01g011370.1.1	0	0	0	0	0	0	0	0	0	0
Solyc01g011390.2.1	0	0	0	0	0	0	0	0	0	0
Solyc01g011400.1.1	0	0	0	0	1	1	0	0	1	0
Solyc01g011410.1.1	44	41	10	13	12	14	17	12	17	14
Solyc01g011420.1.1	0	0	0	0	0	0	0	0	0	0
Solyc01g011430.2.1	3	0	0	0	2	3	4	3	6	6
Solyc01g011450.1.1	9	7	2	5	4	14	9	7	4	5
Solyc01g011460.1.1	0	0	0	0	0	0	0	0	0	0
Solyc01g011470.1.1	0	0	2	0	0	0	0	1	1	2
Solyc01g011480.1.1	0	0	0	0	0	0	0	0	0	0
Solyc01g011490.1.1	0	0	0	0	0	0	0	0	0	0
Solyc01g011500.1.1	0	0	0	0	0	0	0	0	0	0
Solyc01g011510.2.1	23	18	14	12	5	17	2	7	4	10
Solyc01g011520.1.1	0	0	0	0	0	0	0	0	0	0
Solyc01g011530.1.1	0	0	0	0	0	0	0	0	0	0
Solyc01g011540.1.1	0	0	0	0	0	0	0	0	0	0
Solyc01g012540.1.1	0	0	0	0	0	0	0	0	0	0
Solyc01g012550.1.1	0	0	0	0	0	0	0	0	0	0
Solyc01g012560.1.1	0	0	0	0	0	0	0	0	0	0
Solyc01g012570.1.1	0	0	0	0	0	0	0	0	0	0
Solyc01g012580.1.1	0	0	0	0	0	0	0	0	0	0
Solyc01g012590.1.1	0	0	0	0	0	0	0	0	0	0
Solyc01g012600.1.1	0	0	0	0	0	0	0	0	0	0
Solyc01g012610.1.1	0	0	0	0	0	0	0	0	0	0
Solyc01g012620.1.1	0	0	0	0	0	0	0	0	0	0
Solyc01g012630.1.1	0	0	0	0	0	0	0	0	0	0
Solyc01g012640.1.1	0	0	0	0	0	0	0	0	0	0
Solyc01g012650.1.1	0	0	0	0	0	0	0	0	0	0
Solyc01g012660.1.1	0	0	0	0	0	0	0	0	0	0
Solyc01g012670.1.1	0	0	0	0	0	0	0	0	0	0
Solyc01g012680.1.1	0	0	0	0	0	0	0	0	0	0
Solyc01g012690.1.1	0	0	0	0	0	0	0	0	0	0
Solyc01g012700.2.1	0	0	0	0	1	2	0	0	0	0
Solyc01g012710.1.1	0	0	0	0	0	0	0	0	0	0
Solyc01g012720.1.1	0	0	0	0	0	0	0	0	0	0
Solyc01g012730.1.1	0	0	0	0	0	0	0	0	0	0
Solyc01g012740.1.1	0	0	0	0	0	0	0	0	0	0
Solyc01g012750.1.1	0	0	0	0	0	0	0	0	0	0
Solyc01g012760.1.1	3	2	1	0	5	0	1	1	0	1
Solyc01g013760.1.1	0	0	0	0	0	0	0	0	0	0
Solyc01g013770.1.1	0	0	0	0	0	0	0	0	0	0
Solyc01g013780.1.1	0	0	0	0	0	0	0	0	0	0
Solyc01g013790.1.1	0	0	0	0	0	0	0	0	0	0
Solyc01g013800.1.1	0	0	0	0	0	0	0	0	0	0
Solyc01g013810.1.1	0	0	0	0	0	0	0	0	0	0
Solyc01g013820.1.1	0	0	0	0	0	0	0	0	0	0
Solyc01g013830.1.1	0	0	0	0	0	0	0	0	0	0
Solyc01g013840.1.1	0	0	0	0	0	0	0	0	0	0
Solyc01g013850.1.1	0	0	0	0	0	0	0	0	0	0
Solyc01g013860.1.1	0	0	0	0	0	0	0	0	0	0
Solyc01g013870.1.1	0	0	0	0	0	0	0	0	0	0
Solyc01g013880.1.1	0	0	0	0	0	0	0	0	0	0
Solyc01g013890.1.1	0	0	1	0	1	0	0	0	0	0
Solyc01g013900.2.1	2	3	3	0	1	1	0	1	0	0
Solyc01g013910.1.1	0	0	0	0	0	0	0	0	0	0
Solyc01g013920.1.1	0	0	0	0	0	0	0	0	0	0
Solyc01g013930.1.1	0	0	0	0	0	0	0	0	0	0
Solyc01g013940.1.1	0	0	0	0	0	0	0	0	0	0
Solyc01g013950.1.1	0	0	0	0	0	0	0	0	0	0
Solyc01g013960.1.1	0	0	0	0	0	0	0	0	0	0
Solyc01g013970.1.1	0	0	0	0	0	0	0	0	0	0
Solyc01g013980.1.1	0	0	0	0	0	0	0	0	0	0
Solyc01g013990.1.1	0	0	0	0	0	0	0	0	0	0
Solyc01g014000.1.1	0	0	0	0	0	0	0	0	0	0
Solyc01g014010.1.1	0	0	0	0	0	0	0	0	0	1
Solyc01g014020.1.1	0	0	0	0	0	0	0	0	0	0
Solyc01g014030.1.1	0	0	0	0	0	0	0	0	0	0
Solyc01g014040.1.1	0	0	0	0	0	0	0	0	0	0
Solyc01g014050.1.1	0	0	0	0	0	0	0	0	0	0
Solyc01g014060.1.1	0	0	0	0	0	0	0	0	0	0
Solyc01g014070.1.1	0	0	0	0	0	0	0	0	0	0
Solyc01g014080.1.1	0	0	0	0	0	0	0	0	0	0
Solyc01g014090.1.1	3	1	2	0	2	2	0	3	1	1
Solyc01g014100.2.1	4	2	0	2	4	1	2	8	6	5
Solyc01g014110.2.1	25	24	23	21	23	19	12	18	12	23
Solyc01g014120.2.1	24	12	22	19	13	19	8	12	10	14
Solyc01g014130.1.1	0	0	0	0	0	0	0	0	0	0
Solyc01g014140.2.1	0	0	0	0	0	0	0	0	2	2
Solyc01g014150.1.1	0	0	0	0	0	1	2	0	0	0
Solyc01g014160.1.1	0	0	0	0	0	0	0	0	1	0
Solyc01g014170.1.1	0	0	0	0	0	0	0	0	0	0
Solyc01g014180.2.1	3505	3610	3075	3238	4907	4933	2371	2667	3846	3791
Solyc01g014190.1.1	0	0	0	0	0	0	0	0	0	0
Solyc01g014200.1.1	65	81	72	70	102	96	42	57	75	84
Solyc01g014210.1.1	1	1	1	0	0	0	0	0	0	0
Solyc01g014220.1.1	7	5	4	8	8	2	3	3	4	3
Solyc01g014230.2.1	501	474	450	491	426	405	273	288	388	390
Solyc01g014240.1.1	0	0	0	0	0	0	0	0	0	0
Solyc01g014250.2.1	1	0	0	0	0	0	2	3	3	3
Solyc01g014260.1.1	0	0	0	0	0	0	0	0	0	0
Solyc01g014270.2.1	0	0	0	0	0	1	1	2	1	0
Solyc01g014280.2.1	176	161	93	88	104	103	87	93	65	55
Solyc01g014290.1.1	9	12	10	6	10	7	7	6	4	1
Solyc01g014300.1.1	0	0	0	1	0	0	0	0	0	0
Solyc01g014310.1.1	0	0	2	1	0	3	1	1	3	2
Solyc01g014320.2.1	0	0	0	0	0	0	0	0	0	0
Solyc01g014330.2.1	0	0	0	0	0	0	0	0	0	0
Solyc01g014340.1.1	0	0	0	0	0	0	0	0	0	0
Solyc01g014350.1.1	0	0	0	0	0	0	0	0	0	0
Solyc01g014360.1.1	0	0	0	0	0	0	0	0	0	0
Solyc01g014370.1.1	0	0	1	0	0	0	0	2	1	1
Solyc01g014380.2.1	8	11	14	14	14	14	7	10	8	4
Solyc01g014390.2.1	0	0	2	0	1	0	0	0	0	0
Solyc01g014400.1.1	0	0	0	0	0	0	0	0	0	0
Solyc01g014410.1.1	0	0	0	0	0	0	0	0	0	0
Solyc01g014420.1.1	0	0	0	0	0	0	0	0	0	0
Solyc01g014430.1.1	0	0	0	0	0	0	0	0	0	0
Solyc01g014440.1.1	0	0	0	0	0	0	0	0	0	0
Solyc01g014450.1.1	0	0	0	0	0	0	0	0	0	0
Solyc01g014460.1.1	0	0	0	0	0	0	0	0	0	0
Solyc01g014470.1.1	3	2	3	2	0	4	3	4	2	3
Solyc01g014480.2.1	595	584	506	560	411	456	293	335	452	424
Solyc01g014490.2.1	1534	1565	1178	1284	1165	1214	664	744	963	898
Solyc01g014500.1.1	0	0	0	0	0	0	0	0	0	0
Solyc01g014510.1.1	3	4	2	6	4	7	3	2	1	4
Solyc01g014520.1.1	4	6	7	6	6	10	11	5	10	6
Solyc01g014530.2.1	2	1	1	2	1	0	1	2	3	1
Solyc01g014540.1.1	0	0	0	1	0	0	0	1	0	0
Solyc01g014550.1.1	1	1	1	0	0	0	0	1	0	0
Solyc01g014560.2.1	7	2	7	4	2	4	6	7	6	1
Solyc01g014570.1.1	0	0	0	0	1	0	1	0	0	0
Solyc01g014580.1.1	0	0	0	0	0	0	0	0	0	0
Solyc01g014600.1.1	0	0	0	0	0	0	0	0	0	0
Solyc01g014610.1.1	0	0	0	0	0	0	0	0	0	0
Solyc01g014620.1.1	45	33	37	49	41	44	20	22	52	22
Solyc01g014630.1.1	0	0	0	0	0	0	0	0	0	0
Solyc01g014640.1.1	0	0	0	0	0	0	0	0	0	0
Solyc01g014650.1.1	0	0	0	0	0	0	0	0	0	0
Solyc01g014660.1.1	0	0	0	0	0	0	0	0	0	0
Solyc01g014670.1.1	0	0	0	0	0	0	0	0	0	0
Solyc01g014680.1.1	0	0	0	0	0	0	0	0	0	0
Solyc01g014690.2.1	0	0	0	0	0	0	0	0	0	0
Solyc01g014700.2.1	0	0	0	1	0	0	0	0	1	0
Solyc01g014710.1.1	0	0	1	0	0	0	1	0	1	1
Solyc01g014720.1.1	0	0	0	0	0	0	0	0	0	0
Solyc01g014730.1.1	0	0	0	0	0	0	0	0	0	1
Solyc01g014740.1.1	0	0	0	0	0	0	0	0	0	0
Solyc01g014760.1.1	0	0	0	0	0	0	0	0	0	0
Solyc01g014770.1.1	0	0	0	0	0	0	0	0	0	0
Solyc01g014780.1.1	0	0	0	0	0	0	0	0	0	0
Solyc01g014790.1.1	0	0	0	0	0	0	0	0	0	0
Solyc01g014800.1.1	0	0	0	0	0	0	0	0	0	0
Solyc01g014820.1.1	0	0	0	0	1	0	0	0	0	0
Solyc01g014830.1.1	4	3	1	1	0	0	0	2	1	1
Solyc01g014840.2.1	45	40	64	67	35	28	39	47	68	73
Solyc01g014850.2.1	1268	1324	1159	1296	1045	1143	999	1166	1404	1508
Solyc01g014860.2.1	0	0	0	0	0	0	0	0	0	0
Solyc01g014870.1.1	0	0	0	0	0	1	0	0	0	0
Solyc01g014880.2.1	0	0	0	0	0	0	0	0	0	0
Solyc01g014890.1.1	0	0	0	0	0	0	0	0	0	0
Solyc01g014900.1.1	0	0	0	0	0	0	0	0	0	0
Solyc01g014910.1.1	0	0	0	0	0	0	0	0	0	0
Solyc01g014920.1.1	0	0	0	0	0	0	0	0	0	0
Solyc01g014930.1.1	0	0	0	0	0	0	0	0	0	1
Solyc01g014940.1.1	0	0	0	0	0	0	0	0	0	0
Solyc01g014950.1.1	0	0	0	0	0	0	0	0	0	0
Solyc01g014960.1.1	0	0	0	0	0	0	0	0	0	0
Solyc01g014970.1.1	0	0	0	0	0	0	0	0	0	0
Solyc01g014980.2.1	0	2	1	0	1	1	0	0	3	1
Solyc01g014990.1.1	2	1	6	1	3	1	1	0	4	1
Solyc01g015000.2.1	127	124	125	116	101	92	92	87	120	95
Solyc01g015010.1.1	0	0	1	1	1	1	1	4	3	1
Solyc01g015020.2.1	1835	1902	1775	1932	1835	1850	1332	1599	2144	2006
Solyc01g015030.1.1	0	0	0	0	0	0	0	0	0	0
Solyc01g015040.1.1	1	0	0	0	0	0	0	0	0	0
Solyc01g015050.1.1	0	0	0	0	0	0	0	0	0	0
Solyc01g015060.1.1	0	0	1	0	0	0	0	0	0	0
Solyc01g015070.2.1	0	0	0	0	0	0	0	0	0	0
Solyc01g015080.2.1	0	0	0	0	0	0	0	0	0	0
Solyc01g015090.1.1	0	0	1	1	0	1	0	0	0	0
Solyc01g015100.1.1	0	0	0	0	1	0	0	0	0	0
Solyc01g015110.1.1	2	1	1	0	1	1	1	3	0	0
Solyc01g015120.1.1	0	0	0	0	0	0	0	0	0	0
Solyc01g015130.1.1	0	0	0	0	0	0	0	0	0	0
Solyc01g015140.1.1	0	0	0	0	0	0	0	0	0	0
Solyc01g015150.1.1	0	0	0	0	0	0	0	0	0	0
Solyc01g015160.1.1	0	0	0	0	0	0	0	0	0	0
Solyc01g015170.1.1	0	0	0	0	0	0	0	0	0	0
Solyc01g015180.1.1	0	0	0	0	0	0	0	0	0	0
Solyc01g015190.1.1	0	0	0	0	0	0	0	0	0	0
Solyc01g015200.1.1	0	0	0	0	0	0	0	0	0	0
Solyc01g015210.1.1	0	0	0	0	0	0	0	0	0	0
Solyc01g015220.1.1	0	0	0	0	0	0	0	0	0	0
Solyc01g015230.1.1	0	0	0	0	0	0	0	0	0	0
Solyc01g015240.1.1	2	0	0	0	1	0	1	0	0	0
Solyc01g015250.1.1	21	14	21	19	31	20	16	23	22	21
Solyc01g015260.1.1	0	0	0	0	0	0	0	0	0	0
Solyc01g015270.1.1	0	0	0	0	0	0	0	0	0	0
Solyc01g015280.1.1	0	0	0	0	0	0	0	0	0	0
Solyc01g015290.1.1	0	0	0	0	0	0	0	0	0	0
Solyc01g015300.1.1	0	0	0	0	0	0	0	0	0	0
Solyc01g016300.1.1	0	0	0	0	0	0	0	0	0	0
Solyc01g016310.1.1	0	0	0	0	0	0	0	0	0	0
Solyc01g016320.1.1	0	0	0	0	0	0	0	0	0	0
Solyc01g016330.1.1	0	0	0	0	0	0	0	0	0	0
Solyc01g016340.1.1	0	0	0	0	0	0	0	0	0	0
Solyc01g016350.1.1	0	0	0	0	0	0	0	0	0	0
Solyc01g016360.1.1	0	0	0	0	0	0	0	0	0	0
Solyc01g016370.1.1	0	0	0	0	0	0	0	0	0	0
Solyc01g016380.2.1	3	3	1	5	0	4	0	0	2	0
Solyc01g016390.2.1	1	0	0	0	1	0	1	0	1	0
Solyc01g016400.1.1	1	0	3	3	1	1	1	2	1	1
Solyc01g016410.2.1	103	113	87	89	119	121	61	79	99	106
Solyc01g016430.1.1	0	0	0	0	0	0	0	0	0	0
Solyc01g016450.1.1	0	0	0	0	0	0	0	0	0	0
Solyc01g016460.2.1	16	15	10	8	10	11	16	11	11	9
Solyc01g016470.2.1	1658	1660	1335	1377	1024	1030	1412	1613	2173	2322
Solyc01g016480.1.1	8	9	6	12	17	9	10	3	9	13
Solyc01g016510.1.1	0	0	0	0	0	0	0	0	0	0
Solyc01g016520.1.1	1	0	0	0	0	0	0	0	0	0
Solyc01g016530.1.1	0	0	0	0	1	0	0	2	1	1
Solyc01g016540.1.1	3	0	0	0	2	0	1	0	1	0
Solyc01g016550.1.1	0	0	1	0	0	0	0	0	0	0
Solyc01g016560.1.1	1	1	1	1	0	0	0	0	1	1
Solyc01g016570.1.1	0	0	0	0	0	0	0	0	0	0
Solyc01g016580.1.1	0	0	0	0	0	0	0	0	0	0
Solyc01g016590.1.1	0	0	0	0	1	0	0	0	0	0
Solyc01g016600.1.1	0	0	0	0	0	0	0	0	0	0
Solyc01g016610.1.1	0	0	0	0	0	0	0	0	0	0
Solyc01g016620.1.1	0	0	0	0	0	0	0	0	0	0
Solyc01g016630.1.1	0	0	1	2	1	2	0	0	0	1
Solyc01g016640.1.1	0	0	0	0	0	0	0	0	0	0
Solyc01g016650.1.1	0	0	0	0	0	0	0	0	0	0
Solyc01g016660.1.1	43	26	38	27	45	48	23	33	41	33
Solyc01g016670.1.1	0	0	0	0	0	0	0	0	0	0
Solyc01g016680.1.1	0	0	0	0	0	0	0	0	0	0
Solyc01g016690.1.1	0	0	0	0	0	0	0	0	0	0
Solyc01g016700.2.1	0	0	0	0	1	0	0	1	0	0
Solyc01g016710.1.1	0	0	0	0	0	0	0	0	0	0
Solyc01g016720.2.1	0	0	0	0	0	0	0	0	0	0
Solyc01g016730.1.1	0	0	0	0	0	0	0	0	0	0
Solyc01g016740.1.1	0	0	0	0	0	0	0	0	0	0
Solyc01g016750.1.1	0	0	0	0	0	0	0	0	0	0
Solyc01g016760.1.1	0	0	0	0	0	0	0	0	0	0
Solyc01g016770.1.1	0	0	0	0	0	0	0	0	0	0
Solyc01g016780.1.1	0	0	0	0	0	0	0	0	0	0
Solyc01g016790.1.1	0	0	0	0	0	0	0	0	0	0
Solyc01g016800.1.1	0	0	0	0	0	0	1	0	0	0
Solyc01g016810.1.1	0	0	0	0	0	0	0	0	0	0
Solyc01g016820.1.1	0	0	0	0	0	0	0	0	0	0
Solyc01g016830.1.1	0	0	0	0	0	0	0	0	0	0
Solyc01g016840.1.1	0	0	0	0	0	0	0	0	0	0
Solyc01g016850.1.1	0	0	0	0	0	0	0	0	0	0
Solyc01g016860.1.1	0	0	0	0	0	0	0	0	0	0
Solyc01g016870.1.1	0	0	0	0	0	0	0	0	0	0
Solyc01g016880.1.1	0	0	0	0	0	0	0	0	0	0
Solyc01g016890.1.1	0	0	0	0	0	0	0	0	0	0
Solyc01g016900.1.1	0	0	0	0	0	0	0	0	0	0
Solyc01g016910.1.1	0	0	0	0	0	0	0	0	0	0
Solyc01g016920.1.1	0	0	0	0	0	0	0	0	0	0
Solyc01g016930.1.1	0	0	0	0	0	0	0	0	0	0
Solyc01g016940.1.1	0	0	0	0	0	0	0	0	0	0
Solyc01g016950.1.1	0	2	0	0	1	0	0	0	0	0
Solyc01g016960.1.1	0	0	0	0	0	0	0	0	0	0
Solyc01g016970.1.1	1	1	2	0	4	2	4	1	6	7
Solyc01g016980.1.1	0	0	0	0	0	0	0	0	0	0
Solyc01g016990.1.1	0	0	0	0	0	0	0	0	0	0
Solyc01g017000.1.1	0	0	0	0	0	0	0	0	0	0
Solyc01g017010.1.1	0	0	0	0	0	0	0	0	0	0
Solyc01g017020.1.1	0	0	0	0	0	0	0	0	0	0
Solyc01g017030.1.1	0	0	0	0	0	0	0	0	0	0
Solyc01g017040.1.1	0	0	0	0	0	0	0	0	0	0
Solyc01g017050.1.1	10	6	0	0	0	0	0	1	0	0
Solyc01g017060.1.1	0	0	0	0	0	0	0	0	0	0
Solyc01g017070.1.1	0	0	0	0	0	0	0	0	0	0
Solyc01g017080.1.1	0	0	0	0	0	0	0	0	0	0
Solyc01g017090.2.1	1	0	0	1	2	0	0	0	0	0
Solyc01g017100.1.1	2	1	0	0	0	1	0	0	1	0
Solyc01g017110.1.1	1	0	0	0	0	0	0	0	0	0
Solyc01g017120.1.1	0	0	0	0	0	0	0	0	0	0
Solyc01g017130.1.1	0	0	0	0	0	0	0	0	0	0
Solyc01g017140.1.1	0	0	0	0	0	0	0	0	0	0
Solyc01g017150.1.1	0	0	0	0	0	0	0	0	0	0
Solyc01g017160.1.1	0	0	0	0	0	0	0	0	0	0
Solyc01g017170.1.1	0	0	0	0	0	0	0	0	0	0
Solyc01g017180.1.1	0	0	0	0	0	0	0	0	0	0
Solyc01g017190.1.1	0	0	0	0	0	0	0	0	0	0
Solyc01g017200.1.1	0	0	0	0	0	0	0	0	0	0
Solyc01g017210.1.1	0	0	0	0	0	0	0	0	0	0
Solyc01g017220.1.1	0	0	0	0	0	0	0	0	1	0
Solyc01g017230.1.1	0	0	0	0	1	0	0	0	0	1
Solyc01g017240.1.1	3	1	1	2	4	5	0	2	4	5
Solyc01g017250.1.1	0	0	0	0	0	0	0	0	0	0
Solyc01g017260.1.1	0	0	0	0	0	0	0	0	0	0
Solyc01g017270.1.1	0	0	0	0	0	0	0	0	0	0
Solyc01g017280.1.1	0	0	0	0	0	0	0	0	0	0
Solyc01g017290.1.1	0	0	0	0	0	0	0	0	0	0
Solyc01g017300.1.1	0	2	0	0	2	0	1	0	1	1
Solyc01g017310.1.1	0	0	0	0	0	0	0	0	0	0
Solyc01g017320.1.1	4	4	0	0	2	1	0	0	0	1
Solyc01g017330.1.1	5	9	1	0	3	0	0	0	1	1
Solyc01g017340.1.1	0	0	0	0	0	0	0	0	0	1
Solyc01g017350.1.1	0	0	0	1	0	0	0	0	0	1
Solyc01g017360.1.1	0	1	0	0	0	0	0	1	1	0
Solyc01g017370.1.1	0	1	1	0	0	0	0	0	0	0
Solyc01g017380.1.1	0	1	2	1	0	0	0	0	0	0
Solyc01g017390.1.1	0	0	0	0	0	0	0	0	0	0
Solyc01g017400.1.1	0	0	0	0	0	1	0	0	0	0
Solyc01g017410.1.1	0	0	0	0	0	0	0	0	0	0
Solyc01g017420.1.1	3	2	0	1	0	0	1	0	1	2
Solyc01g017430.1.1	0	0	0	0	0	0	0	0	0	0
Solyc01g017440.1.1	0	0	0	0	0	0	0	0	0	0
Solyc01g017450.1.1	0	0	0	0	0	0	0	0	0	0
Solyc01g017460.1.1	1	0	1	0	0	0	0	0	0	0
Solyc01g017470.1.1	0	0	0	0	0	0	0	0	0	0
Solyc01g017480.1.1	0	0	0	0	0	0	0	0	1	0
Solyc01g017490.1.1	172	205	21	21	12	5	9	11	18	31
Solyc01g017500.1.1	0	0	0	0	0	0	0	0	0	0
Solyc01g017510.1.1	0	0	0	0	0	0	0	0	0	0
Solyc01g017520.1.1	2	0	1	0	0	0	0	0	0	0
Solyc01g017530.1.1	1	3	2	2	1	0	1	1	3	2
Solyc01g017540.1.1	0	0	0	0	0	0	0	0	0	0
Solyc01g017550.1.1	0	0	0	0	0	0	0	0	0	0
Solyc01g017560.1.1	50	62	55	53	63	70	45	41	52	60
Solyc01g017570.1.1	0	0	0	0	0	0	0	0	0	0
Solyc01g017580.1.1	0	0	0	0	0	0	0	0	0	0
Solyc01g017590.1.1	0	0	0	0	0	0	0	0	0	0
Solyc01g017600.2.1	1	1	1	2	6	6	2	1	5	5
Solyc01g017610.1.1	0	0	0	0	0	0	0	0	0	0
Solyc01g017620.1.1	0	0	0	0	0	0	0	0	0	0
Solyc01g017630.1.1	0	0	0	0	0	0	0	0	0	0
Solyc01g017640.1.1	0	0	1	0	0	0	0	0	0	0
Solyc01g017650.1.1	0	0	0	0	0	0	0	0	0	0
Solyc01g017660.1.1	0	0	0	0	0	0	0	0	0	0
Solyc01g017670.1.1	0	0	0	0	0	0	0	0	0	0
Solyc01g017680.1.1	0	0	0	0	0	0	0	0	0	0
Solyc01g017690.1.1	0	0	0	0	0	0	0	0	0	0
Solyc01g017700.1.1	0	0	0	0	0	0	0	0	0	0
Solyc01g017710.1.1	0	0	0	0	1	0	0	0	0	0
Solyc01g017720.1.1	0	0	0	0	0	0	0	0	0	0
Solyc01g017730.1.1	0	1	0	0	0	2	0	0	0	0
Solyc01g017740.1.1	13	16	4	8	11	10	7	4	8	12
Solyc01g017750.1.1	0	0	0	0	0	0	0	0	0	0
Solyc01g017760.1.1	0	0	0	0	0	0	0	0	0	0
Solyc01g017770.1.1	0	0	0	0	0	0	0	0	0	0
Solyc01g017780.1.1	0	1	0	0	1	0	0	0	0	0
Solyc01g017790.1.1	0	0	0	0	0	0	0	0	0	0
Solyc01g017800.1.1	0	0	0	0	0	0	0	0	0	0
Solyc01g017810.1.1	0	0	0	0	0	0	0	0	0	0
Solyc01g017820.1.1	0	0	0	0	0	0	0	0	0	0
Solyc01g017830.1.1	0	0	0	0	0	0	0	0	0	0
Solyc01g017840.1.1	0	0	0	0	0	0	0	0	0	0
Solyc01g017850.1.1	4	6	3	4	5	0	2	4	3	1
Solyc01g017860.2.1	30	38	19	31	33	43	17	25	44	41
Solyc01g017870.1.1	0	0	0	0	1	1	0	0	0	0
Solyc01g017880.1.1	0	0	0	0	0	0	0	0	0	0
Solyc01g017890.1.1	0	0	0	0	0	0	0	0	0	0
Solyc01g017900.1.1	0	0	0	0	0	0	0	0	0	0
Solyc01g017910.1.1	0	0	0	0	0	0	0	0	0	0
Solyc01g017920.1.1	0	0	0	0	0	0	0	0	0	0
Solyc01g017930.1.1	0	0	0	0	0	0	0	0	0	0
Solyc01g017940.1.1	0	0	0	0	0	0	0	0	0	0
Solyc01g017950.1.1	0	0	0	0	0	0	0	0	0	0
Solyc01g017960.1.1	0	0	0	0	0	0	0	0	0	0
Solyc01g017970.1.1	0	0	0	0	0	0	0	0	0	0
Solyc01g017980.1.1	0	0	0	0	0	0	0	0	0	0
Solyc01g017990.1.1	0	0	0	0	0	0	0	0	0	0
Solyc01g018000.1.1	0	0	0	0	0	0	0	0	0	0
Solyc01g018010.1.1	0	0	0	0	0	0	0	0	0	0
Solyc01g018020.1.1	1	3	1	4	4	1	1	3	2	0
Solyc01g018040.1.1	0	0	0	0	0	0	0	0	0	0
Solyc01g018050.1.1	0	0	0	0	0	0	0	0	0	0
Solyc01g018060.1.1	0	0	0	0	0	0	0	0	0	0
Solyc01g018070.1.1	0	0	0	0	0	0	0	0	0	0
Solyc01g018080.1.1	0	0	0	0	0	0	0	0	0	0
Solyc01g018090.1.1	4	5	2	4	5	6	8	5	3	6
Solyc01g018100.1.1	0	0	0	0	0	0	0	0	0	0
Solyc01g019100.1.1	0	0	0	0	0	0	0	0	0	0
Solyc01g020100.1.1	0	0	0	0	0	0	0	0	0	0
Solyc01g020110.1.1	0	0	0	0	0	0	0	0	0	0
Solyc01g020120.1.1	0	1	0	1	1	1	1	0	2	3
Solyc01g020130.2.1	23	12	14	11	17	16	13	13	21	8
Solyc01g020140.2.1	0	0	0	0	0	0	0	0	0	0
Solyc01g020150.2.1	0	0	0	0	0	0	0	0	1	0
Solyc01g020160.1.1	0	0	0	0	0	0	0	0	0	0
Solyc01g020170.1.1	0	0	0	0	0	0	0	0	0	0
Solyc01g020180.1.1	0	0	0	0	0	0	0	0	0	0
Solyc01g020190.2.1	42	33	43	28	29	26	12	14	30	39
Solyc01g020200.1.1	16	19	5	5	6	3	5	7	5	1
Solyc01g020210.1.1	0	0	1	0	0	0	0	0	0	0
Solyc01g020220.1.1	138	183	132	117	75	67	65	87	89	93
Solyc01g020230.2.1	83	100	43	58	51	36	41	45	39	48
Solyc01g020240.2.1	1042	1168	882	917	987	960	643	729	867	882
Solyc01g020250.1.1	0	0	0	0	0	0	0	0	0	0
Solyc01g020260.1.1	0	0	0	0	0	0	0	0	0	0
Solyc01g020270.1.1	0	0	2	0	0	0	1	0	0	2
Solyc01g020280.1.1	0	0	0	0	0	0	0	0	0	0
Solyc01g020290.1.1	0	0	0	0	0	0	1	0	1	0
Solyc01g020300.2.1	0	0	0	0	0	0	0	0	0	0
Solyc01g020310.1.1	0	0	0	0	0	0	0	0	0	0
Solyc01g020320.2.1	148	123	95	94	108	97	72	82	106	113
Solyc01g020330.2.1	0	1	1	0	0	0	0	0	0	0
Solyc01g020340.1.1	8	16	10	15	17	13	8	12	8	16
Solyc01g020350.1.1	0	0	3	0	1	0	0	2	1	0
Solyc01g020360.1.1	0	0	0	0	0	0	0	0	0	0
Solyc01g020370.1.1	35	35	25	33	27	31	15	22	22	19
Solyc01g020380.1.1	0	1	0	0	0	1	0	0	0	0
Solyc01g020390.1.1	0	0	0	0	0	0	0	0	0	0
Solyc01g020400.1.1	0	0	0	0	0	0	0	0	0	0
Solyc01g020410.1.1	0	0	0	0	0	0	0	0	0	2
Solyc01g020430.1.1	0	0	0	0	0	0	0	0	0	0
Solyc01g020440.2.1	1417	1486	1054	1090	917	848	758	896	1094	1089
Solyc01g020450.1.1	0	0	0	0	0	0	0	0	0	0
Solyc01g020460.1.1	0	0	0	0	0	0	0	0	0	0
Solyc01g020470.1.1	0	0	0	0	0	0	0	0	0	0
Solyc01g020480.1.1	0	0	0	0	0	0	0	0	0	0
Solyc01g020490.1.1	0	0	0	0	0	0	0	0	0	0
Solyc01g020500.1.1	2	2	0	2	1	3	0	0	1	0
Solyc01g020510.1.1	0	0	0	0	0	0	0	0	0	0
Solyc01g020520.2.1	149	137	135	126	121	104	62	105	94	98
Solyc01g020530.1.1	0	1	0	0	0	1	0	1	1	0
Solyc01g020550.1.1	0	0	0	0	0	0	0	0	0	0
Solyc01g020560.1.1	1	1	7	5	2	3	2	1	1	4
Solyc01g020570.1.1	1	4	1	2	1	0	1	0	1	0
Solyc01g020580.1.1	1	0	0	0	0	1	0	0	0	0
Solyc01g020590.1.1	2	0	0	0	1	0	0	0	0	1
Solyc01g020600.1.1	2	4	4	1	5	3	2	2	2	2
Solyc01g021600.2.1	0	0	0	0	0	0	0	0	0	0
Solyc01g021610.1.1	0	0	0	0	0	0	0	0	0	0
Solyc01g021620.1.1	0	0	0	0	0	0	0	0	0	0
Solyc01g021630.1.1	0	0	0	0	0	0	0	1	0	0
Solyc01g021640.2.1	396	383	327	360	311	288	192	197	274	250
Solyc01g021650.1.1	0	0	0	0	0	0	0	0	0	0
Solyc01g021660.1.1	0	0	0	0	0	0	0	0	0	0
Solyc01g021670.2.1	300	359	233	265	235	267	263	309	309	298
Solyc01g021680.1.1	0	0	0	0	0	1	0	0	1	1
Solyc01g021690.1.1	0	0	0	0	0	0	0	0	0	0
Solyc01g021700.1.1	0	0	0	0	0	0	0	0	0	0
Solyc01g021710.1.1	0	0	0	0	0	0	0	0	0	0
Solyc01g021720.1.1	2	1	3	2	0	2	0	3	1	2
Solyc01g021730.2.1	2	8	4	3	7	1	2	8	8	3
Solyc01g021740.1.1	122	100	101	89	46	55	59	48	75	85
Solyc01g022740.2.1	353	291	303	360	281	296	221	239	267	267
Solyc01g022750.2.1	1625	1701	1350	1463	1048	1048	1468	1752	1852	1820
Solyc01g022760.1.1	0	0	0	0	0	0	0	0	0	0
Solyc01g022770.1.1	0	0	1	0	0	0	0	1	0	0
Solyc01g022780.1.1	28	6	14	13	10	7	3	2	10	10
Solyc01g022790.1.1	0	0	0	0	0	0	0	0	0	0
Solyc01g028800.1.1	14	24	13	13	15	24	25	19	18	29
Solyc01g028810.2.1	20322	20983	19216	20273	16475	16407	18321	20912	24829	24456
Solyc01g028830.2.1	201	213	146	163	176	166	76	115	134	121
Solyc01g028840.1.1	0	0	0	0	0	0	0	0	0	0
Solyc01g028850.1.1	0	0	0	0	0	0	0	0	0	0
Solyc01g028860.2.1	12954	13567	11636	12352	9761	10068	6967	8029	10117	9996
Solyc01g028870.2.1	468	490	452	406	361	336	315	381	434	426
Solyc01g028880.1.1	0	0	0	0	0	0	0	0	0	0
Solyc01g028890.1.1	0	0	0	0	0	0	0	0	0	0
Solyc01g028900.2.1	1058	1187	881	946	931	1005	755	807	982	880
Solyc01g028910.1.1	0	1	2	4	4	1	3	0	1	2
Solyc01g028920.1.1	0	0	0	0	0	0	0	0	0	0
Solyc01g028930.2.1	575	606	472	476	393	400	324	375	465	425
Solyc01g028940.1.1	0	0	0	0	0	0	0	0	0	0
Solyc01g028950.1.1	0	0	0	0	0	0	0	0	0	0
Solyc01g028960.1.1	0	0	0	0	0	0	0	0	0	0
Solyc01g028970.1.1	0	0	0	0	0	0	0	0	0	0
Solyc01g028980.1.1	0	0	0	0	0	0	0	1	0	0
Solyc01g033980.2.1	0	0	0	0	0	0	0	0	0	0
Solyc01g033990.1.1	0	0	0	0	0	0	0	0	0	0
Solyc01g034000.1.1	0	0	0	0	0	0	0	0	0	0
Solyc01g034010.1.1	0	0	0	0	0	0	0	0	0	0
Solyc01g034020.2.1	1500	1591	1395	1480	898	873	917	1158	1334	1375
Solyc01g034030.1.1	0	0	0	0	0	0	0	0	0	0
Solyc01g034040.1.1	0	0	0	0	0	0	0	0	0	0
Solyc01g034050.1.1	0	0	0	0	0	0	0	0	0	0
Solyc01g034060.1.1	0	0	0	0	0	0	0	0	0	0
Solyc01g034070.1.1	3	4	7	7	3	1	2	1	2	2
Solyc01g034080.1.1	25	26	21	22	31	33	9	8	32	19
Solyc01g034090.1.1	0	0	0	0	0	0	0	0	0	0
Solyc01g034100.1.1	0	0	0	0	0	0	0	0	0	0
Solyc01g034110.1.1	0	0	0	0	0	0	0	0	0	0
Solyc01g034120.2.1	0	0	0	0	0	0	0	0	1	0
Solyc01g034130.1.1	0	0	0	0	0	0	0	0	0	0
Solyc01g034140.1.1	0	0	0	0	0	0	0	0	0	0
Solyc01g034150.2.1	642	653	580	646	592	551	257	312	472	424
Solyc01g034160.1.1	0	0	0	1	0	1	0	0	0	0
Solyc01g034170.1.1	0	0	0	0	0	0	0	0	0	0
Solyc01g034180.1.1	0	0	1	2	3	0	0	0	0	0
Solyc01g034190.1.1	0	0	0	0	0	0	0	0	0	0
Solyc01g034200.1.1	0	0	0	0	0	0	0	0	0	0
Solyc01g034210.1.1	0	0	0	0	0	0	0	0	0	0
Solyc01g034220.1.1	1	2	0	0	1	0	0	1	0	0
Solyc01g035220.1.1	0	0	0	0	0	0	0	0	0	0
Solyc01g038220.1.1	0	0	0	0	0	0	0	0	0	0
[truncated: 32,726 more rows]

## Sheet: C. annuum
geneid	MVM1	MVM2	TM1	TM2	FM1	FM2
CA00g00010	0	0	0	0	0	0
CA00g00020	72	81	141	81	75	70
CA00g00030	0	2	7	4	0	1
CA00g00040	363	366	760	629	996	1207
CA00g00050	8469	11035	10583	10044	4630	6022
CA00g00060	36	73	158	156	84	108
CA00g00070	0	1	6	0	0	0
CA00g00080	0	0	0	0	0	0
CA00g00090	2	17	15	1	2	2
CA00g00100	22	14	43	59	3	4
CA00g00110	6	1	16	57	3	2
CA00g00120	5	4	4	5	0	1
CA00g00130	0	6	0	0	0	0
CA00g00140	1	2	6	6	0	0
CA00g00150	7	3	1	6	6	5
CA00g00160	48	89	72	79	37	53
CA00g00170	140	152	239	174	105	148
CA00g00180	118	138	123	107	55	73
CA00g00190	0	0	0	4	0	0
CA00g00200	0	0	0	0	0	0
CA00g00210	5	12	14	22	9	9
CA00g00220	2	0	0	1	0	0
CA00g00230	0	0	0	0	0	0
CA00g00240	72	53	114	87	47	50
CA00g00250	247	322	419	636	207	281
CA00g00260	312	466	586	543	163	226
CA00g00270	21	6	49	25	24	27
CA00g00280	0	0	3	0	0	0
CA00g00290	277	325	378	423	159	222
CA00g00300	75	50	76	109	12	15
CA00g00310	0	0	0	0	0	0
CA00g00320	363	405	568	762	300	409
CA00g00330	0	7	0	1	0	0
CA00g00340	1	0	3	9	3	6
CA00g00350	218	234	329	304	192	251
CA00g00360	0	0	0	0	0	0
CA00g00370	0	0	0	0	0	0
CA00g00380	5	4	0	13	5	6
CA00g00390	61	45	47	61	29	59
CA00g00400	159	216	226	198	121	123
CA00g00410	37	50	13	18	17	28
CA00g00420	16	26	14	56	6	10
CA00g00430	358	356	522	488	197	300
CA00g00440	3552	4538	4932	5097	2099	2690
CA00g00450	250	317	313	417	172	175
CA00g00460	130	159	208	218	65	79
CA00g00470	14	38	45	43	21	26
CA00g00480	5	10	21	38	17	23
CA00g00490	10	8	25	75	15	19
CA00g00500	2	0	0	0	0	0
CA00g00510	192	163	286	384	94	122
CA00g00520	3	10	11	28	4	2
CA00g00530	3	6	0	0	2	0
CA00g00540	60	132	167	128	65	63
CA00g00550	405	592	785	819	288	323
CA00g00560	6	0	0	0	0	2
CA00g00570	8	6	3	2	0	0
CA00g00580	1	0	0	0	1	0
CA00g00590	9	8	17	21	7	11
CA00g00600	2202	2909	3638	3107	1354	1680
CA00g00610	1	0	0	0	0	0
CA00g00620	3	0	0	0	0	0
CA00g00630	9	6	6	23	8	8
CA00g00640	347	489	528	646	227	279
CA00g00650	52	80	56	66	20	33
CA00g00660	2	2	2	7	0	0
CA00g00670	0	0	6	2	4	3
CA00g00680	0	5	0	1	1	1
CA00g00690	0	0	0	0	0	0
CA00g00700	30	42	119	126	42	61
CA00g00710	0	0	1	0	0	0
CA00g00720	645	731	766	824	439	476
CA00g00730	38	33	96	50	11	13
CA00g00740	8	7	14	23	1	5
CA00g00750	18	20	8	7	2	3
CA00g00760	28	7	21	21	4	4
CA00g00770	0	0	0	0	1	1
CA00g00780	838	32139	7446	3851	2342	2956
CA00g00790	0	0	6	1	0	0
CA00g00800	0	0	0	0	0	0
CA00g00810	0	0	0	0	0	0
CA00g00820	0	0	0	0	0	0
CA00g00830	851	22926	5915	2780	1701	2268
CA00g00840	0	1	0	1	1	1
CA00g00850	0	0	0	0	0	0
CA00g00860	0	0	0	0	0	0
CA00g00870	162	175	213	237	147	191
CA00g00880	7	1	6	11	2	2
CA00g00890	3	17	6	22	4	4
CA00g00900	15	30	31	22	5	11
CA00g00910	75	103	97	76	36	36
CA00g00920	60	83	169	77	66	68
CA00g00930	32	51	45	65	22	26
CA00g00940	0	10	8	5	3	1
CA00g00950	499	586	711	832	350	498
CA00g00960	0	0	0	0	0	0
CA00g00970	523	705	987	904	360	416
CA00g00980	11	18	25	15	11	29
CA00g00990	341	380	515	554	221	281
CA00g01000	181	177	198	221	90	132
CA00g01010	99	154	148	101	55	53
CA00g01020	576	725	957	968	368	442
CA00g01030	1210	1519	1671	1505	700	927
CA00g01040	4	0	0	8	2	3
CA00g01050	3	2	6	10	4	11
CA00g01060	17	20	45	23	5	8
CA00g01070	170	265	260	366	98	151
CA00g01080	2	3	6	4	0	0
CA00g01540	330	497	726	740	344	390
CA00g01550	12	0	1	4	1	3
CA00g01560	0	0	0	0	1	0
CA00g01570	24	30	33	14	35	40
CA00g01580	88	108	95	80	32	33
CA00g01590	288	366	391	503	204	243
CA00g01600	0	1	0	2	0	0
CA00g01610	432	422	662	793	297	414
CA00g01620	747	712	646	605	450	548
CA00g01630	0	0	0	0	0	1
CA00g01640	0	0	0	0	0	0
CA00g01650	0	0	4	0	0	0
CA00g01660	1	0	0	1	2	2
CA00g03020	0	0	0	0	0	0
CA00g03030	1	2	8	2	0	1
CA00g03040	1069	1310	1572	1513	623	748
CA00g03050	11	15	53	50	16	29
CA00g03060	2	5	0	8	0	0
CA00g03070	5	9	10	16	6	7
CA00g03080	4	1	8	10	0	2
CA00g03090	230	262	318	215	134	146
CA00g03100	7	0	0	0	2	1
CA00g03110	1014	1064	1462	1220	782	1076
CA00g03120	0	0	3	0	1	2
CA00g03130	4	12	7	10	7	4
CA00g03140	2	4	12	2	8	13
CA00g03150	80	91	130	169	43	77
CA00g04470	0	0	0	0	0	0
CA00g04480	29	23	21	26	6	12
CA00g04490	0	0	0	0	0	0
CA00g04500	0	0	0	0	0	0
CA00g04510	9	4	16	22	4	11
CA00g04520	0	4	0	0	1	2
CA00g04530	0	0	0	0	0	0
CA00g04540	0	0	0	0	0	0
CA00g04550	0	0	0	0	0	0
CA00g04560	0	0	0	0	0	0
CA00g04570	2079	2807	4175	4145	1685	2075
CA00g04580	16	20	28	19	8	10
CA00g04590	0	0	0	0	0	0
CA00g04600	217	251	313	215	98	133
CA00g04610	3492	4187	4881	5144	2119	2979
CA00g04620	0	0	0	0	0	0
CA00g04630	2	0	0	0	0	0
CA00g06650	0	0	0	0	0	0
CA00g06660	242	5915	2860	1763	572	830
CA00g06670	0	0	0	0	0	0
CA00g06680	591	581	1013	948	557	642
CA00g06690	0	0	0	0	0	0
CA00g06700	197	338	377	339	192	202
CA00g06710	13	6	20	32	8	13
CA00g06720	754	988	1023	892	349	418
CA00g06730	1	0	0	0	0	0
CA00g06740	0	0	2	0	0	0
CA00g06750	0	0	0	1	0	0
CA00g06760	0	0	0	1	1	0
CA00g06770	0	0	0	0	0	0
CA00g06780	0	0	0	0	0	0
CA00g06790	0	0	0	0	0	0
CA00g06800	104	130	121	137	57	63
CA00g06810	0	0	0	0	0	0
CA00g06820	0	0	0	0	0	0
CA00g06830	0	0	0	0	0	0
CA00g06840	0	0	0	0	1	3
CA00g06850	0	0	0	0	0	0
CA00g06860	135	145	199	150	53	86
CA00g06870	50	50	132	121	65	92
CA00g06880	27	13	48	76	8	15
CA00g06890	96	47	150	203	67	56
CA00g06900	1	0	21	12	3	2
CA00g06910	0	0	0	0	0	0
CA00g06920	0	0	2	0	0	0
CA00g06930	562	734	830	842	442	500
CA00g06940	583	574	794	901	315	411
CA00g06950	377	476	725	636	244	309
CA00g06960	448	575	1062	1154	373	485
CA00g06970	26	22	22	23	3	6
CA00g06980	491	726	777	835	404	480
CA00g06990	1662	1991	2374	2090	967	1283
CA00g07000	126	163	265	245	77	85
CA00g07010	325	486	452	591	326	399
CA00g07020	167	159	239	295	130	156
CA00g07030	11	15	15	4	1	1
CA00g07040	0	0	0	0	0	0
CA00g07050	0	9	14	6	3	1
CA00g07060	438	573	436	505	255	297
CA00g07070	0	0	0	0	0	0
CA00g07080	255	280	408	376	171	203
CA00g07090	29	11	75	52	16	19
CA00g07100	0	0	0	0	0	0
CA00g07110	380	304	610	726	225	239
CA00g07120	611	917	914	816	331	420
CA00g07130	138	118	175	209	80	105
CA00g07140	399	341	587	538	228	282
CA00g07150	3	0	3	0	0	0
CA00g07160	27	13	42	45	13	12
CA00g07170	213	310	561	534	261	260
CA00g07180	109	139	207	215	111	118
CA00g07190	131	153	230	157	81	104
CA00g07200	950	1177	1220	1276	637	850
CA00g07210	233	255	330	314	186	273
CA00g07220	0	0	0	0	0	0
CA00g07230	0	0	0	0	0	0
CA00g07240	0	1	0	0	0	0
CA00g07250	4	1	21	11	4	8
CA00g07260	164	272	295	249	143	202
CA00g07270	49	70	62	70	34	40
CA00g07280	3	2	11	10	15	10
CA00g07290	16	9	30	29	18	23
CA00g07300	0	0	0	0	0	0
CA00g07310	0	0	1	5	3	6
CA00g07320	3	2	39	30	6	9
CA00g07330	163	113	345	325	53	74
CA00g09800	0	0	0	0	0	0
CA00g09810	2	7	0	0	0	0
CA00g09820	270	331	435	501	239	248
CA00g09830	6	0	2	2	0	0
CA00g09840	0	0	0	0	0	0
CA00g09850	0	0	0	1	1	2
CA00g09860	27	53	77	51	22	29
CA00g09870	0	0	0	0	0	0
CA00g09880	18	13	23	17	5	2
CA00g09890	0	0	0	0	0	0
CA00g09900	0	0	0	0	0	0
CA00g09910	42	33	103	79	41	46
CA00g10820	9670	11475	14428	15079	6420	7823
CA00g10830	636	640	884	1068	406	458
CA00g10840	160	182	239	264	85	103
CA00g10850	7	16	8	10	4	3
CA00g10860	258	335	452	368	193	271
CA00g10870	74	68	107	69	26	46
CA00g10880	223	237	389	389	161	201
CA00g10890	0	0	0	0	0	0
CA00g10900	0	2	0	0	1	1
CA00g10910	303	312	409	322	159	203
CA00g10920	251	273	372	391	159	215
CA00g10930	5	12	9	0	8	15
CA00g10940	16	11	47	15	8	7
CA00g10950	0	0	0	0	0	0
CA00g10960	0	0	0	0	0	0
CA00g10970	2	6	7	3	9	8
CA00g10980	0	0	0	0	0	0
CA00g10990	59	41	300	273	94	111
CA00g11000	0	0	0	0	0	0
CA00g11010	247	314	593	769	192	290
CA00g11020	0	0	0	0	0	0
CA00g11030	2	0	0	0	0	0
CA00g11040	0	0	0	0	0	0
CA00g11050	219	270	318	400	227	272
CA00g11060	1261	1391	1914	1753	862	1129
CA00g11070	0	0	0	0	0	0
CA00g11080	18	11	36	55	5	4
CA00g11090	0	0	0	0	0	0
CA00g11100	1257	1786	1969	2482	783	946
CA00g11110	5	5	4	4	1	1
CA00g11120	0	3	1	5	0	0
CA00g11130	0	0	0	0	0	0
CA00g11140	0	0	9	4	0	0
CA00g11150	457	613	909	616	340	382
CA00g11160	3935	4513	5050	5202	2218	2819
CA00g11170	0	0	0	0	0	0
CA00g11180	0	0	0	0	0	0
CA00g11190	138	134	248	202	135	152
CA00g11200	0	0	0	0	0	0
CA00g11210	0	0	1	0	0	0
CA00g11220	0	0	0	0	0	0
CA00g13640	0	0	0	0	0	0
CA00g13650	0	0	0	0	0	0
CA00g13660	0	0	0	0	0	0
CA00g13670	0	0	0	0	0	0
CA00g13680	0	0	0	0	0	0
CA00g13690	0	0	0	0	0	0
CA00g13700	21	15	31	33	2	12
CA00g13710	0	1	0	1	0	1
CA00g15180	0	0	0	0	0	0
CA00g15190	0	0	8	12	4	8
CA00g15200	0	0	304	275	39	52
CA00g15210	0	0	0	0	0	0
CA00g15220	2	1	11	19	1	0
CA00g15230	0	0	0	0	0	0
CA00g15240	115	113	279	164	73	98
CA00g15250	118	118	136	150	65	73
CA00g15260	41	54	59	58	9	8
CA00g15270	143	204	249	190	82	88
CA00g15280	402	459	615	782	281	373
CA00g15290	31	13	36	34	36	31
CA00g15300	0	0	0	1	0	0
CA00g15310	209	206	311	286	100	139
CA00g15320	234	222	388	371	140	177
CA00g15330	0	0	0	0	0	0
CA00g15340	8	14	8	13	2	3
CA00g15350	2	1	9	11	2	2
CA00g15360	0	1	0	0	0	0
CA00g15370	0	0	0	0	0	0
CA00g15810	6	14	12	21	5	2
CA00g15820	0	0	0	0	0	0
CA00g15830	0	0	1	0	0	0
CA00g15840	240	342	478	466	212	307
CA00g15850	6	13	15	23	0	2
CA00g15860	2	4	1	1	3	2
CA00g15870	17	22	45	26	11	19
CA00g15880	1527	1769	3212	3207	1064	1402
CA00g15890	88	89	81	85	47	50
CA00g15900	2	0	9	5	14	21
CA00g15910	0	0	0	0	0	0
CA00g15920	0	0	0	0	0	0
CA00g15930	1	0	0	9	1	3
CA00g15940	0	4	0	0	0	0
CA00g15950	0	0	0	0	0	0
CA00g15960	99	199	243	233	95	108
CA00g15970	45	54	45	37	6	15
CA00g15980	29	40	82	62	21	36
CA00g15990	1	1	2	6	1	2
CA00g16000	5541	6449	7651	7925	4166	5027
CA00g16010	0	3	1	0	2	1
CA00g16020	2	13	1	7	1	0
CA00g16030	682	672	1367	1478	752	924
CA00g16040	539	692	916	880	397	516
CA00g16280	1	0	11	23	0	2
CA00g16290	0	0	0	0	0	0
CA00g16300	1	0	0	0	0	0
CA00g16310	0	0	0	0	0	0
CA00g16320	3	0	0	4	0	0
CA00g16330	60	55	100	71	38	45
CA00g16340	104	139	257	214	56	97
CA00g16350	0	2	0	0	0	0
CA00g16360	247	313	433	361	288	396
CA00g16370	5	0	0	0	0	0
CA00g16380	0	0	0	0	0	0
CA00g16390	0	0	0	0	0	0
CA00g16400	1	0	0	0	0	0
CA00g16410	271	428	462	452	154	207
CA00g16420	594	796	922	1061	331	460
CA00g16430	20	26	55	28	14	19
CA00g16440	0	1	0	3	0	1
CA00g16450	0	6	4	2	2	2
CA00g16460	10	15	28	30	14	12
CA00g16470	0	0	0	0	0	0
CA00g16480	13	8	12	14	1	6
CA00g16490	6	16	14	10	4	5
CA00g16500	0	4	0	0	1	0
CA00g16510	0	3	0	1	0	1
CA00g16520	0	0	0	4	0	0
CA00g16530	1569	1677	2622	3395	1146	1411
CA00g16540	0	0	0	0	0	0
CA00g16550	0	0	0	0	0	0
CA00g16560	0	0	0	0	0	0
CA00g16570	1672	1710	2343	2508	1270	1528
CA00g16580	2627	2705	4183	4303	1992	2467
CA00g16590	1796	2136	3861	4113	1683	2133
CA00g16600	0	0	3	0	5	2
CA00g16610	0	0	0	0	0	0
CA00g16620	0	0	0	0	0	0
CA00g16630	0	0	0	0	0	0
CA00g16640	0	0	0	0	0	0
CA00g16650	0	0	2	4	0	0
CA00g16660	27	50	71	22	20	22
CA00g16670	0	0	0	0	0	0
CA00g16680	2	4	6	16	2	3
CA00g18290	0	0	0	0	0	0
CA00g18300	466	557	685	561	312	410
CA00g18310	1182	1389	1665	1625	689	1057
CA00g18320	89	80	194	245	73	107
CA00g18330	16	24	36	48	19	36
CA00g18340	18	34	31	54	14	21
CA00g18350	30	39	57	90	16	21
CA00g18360	6	1	25	29	15	24
CA00g18370	687	672	2812	3219	1698	2079
CA00g18380	44	39	76	105	33	40
CA00g18390	240	381	348	336	155	202
CA00g18400	149	154	320	349	121	136
CA00g18410	447	506	596	671	216	287
CA00g18420	0	0	0	0	0	0
CA00g18430	0	0	0	0	0	0
CA00g18440	14	12	25	21	13	16
CA00g18450	0	0	0	0	0	0
CA00g18720	0	1	13	11	0	2
CA00g18730	0	0	0	0	0	0
CA00g18740	191	196	321	331	92	128
CA00g18750	435	570	668	660	302	431
CA00g18760	15	17	26	3	40	54
CA00g18770	0	0	0	0	0	0
CA00g18780	3557	4183	5419	5311	2442	3136
CA00g18790	171	198	228	209	112	114
CA00g18800	463	644	738	918	344	431
CA00g18810	0	0	0	0	0	0
CA00g18820	0	0	0	0	0	0
CA00g18830	0	0	0	0	0	0
CA00g18840	26	40	47	24	34	43
CA00g18850	0	0	2	3	4	11
CA00g18860	89	96	197	215	46	65
CA00g18870	14	4	24	34	13	22
CA00g18880	102	71	123	153	38	44
CA00g18890	126	205	164	211	86	118
CA00g18900	129	157	247	349	83	97
CA00g19760	1261	1646	2248	2377	881	1107
CA00g19770	22	48	70	65	22	38
CA00g19780	0	16	0	0	2	3
CA00g19790	2488	3069	3810	3717	1686	2209
CA00g19800	0	0	0	0	0	0
CA00g19810	26	21	16	17	14	32
CA00g19820	0	0	0	0	0	0
CA00g19830	50	57	77	115	11	12
CA00g19840	149	138	320	185	45	61
CA00g19850	0	0	0	0	0	0
CA00g19860	0	0	0	0	0	0
CA00g19870	0	0	0	0	0	0
CA00g19880	188	208	261	233	82	94
CA00g19890	152	135	212	234	90	134
CA00g19900	35	24	59	71	20	29
CA00g19910	189	200	269	163	102	122
CA00g19920	207	222	236	233	72	79
CA00g19930	0	0	0	0	0	0
CA00g20830	9	21	28	20	3	7
CA00g20840	147	225	266	306	114	200
CA00g20850	175	179	234	173	112	148
CA00g20860	29	74	74	82	34	34
CA00g20870	12	4	61	84	27	32
CA00g20880	356	367	767	689	293	379
CA00g22810	125	115	276	228	63	67
CA00g22820	39	11	44	57	24	30
CA00g22830	0	0	0	0	0	0
CA00g22840	0	0	0	0	0	0
CA00g22850	0	0	0	0	0	0
CA00g22860	0	0	0	0	0	0
CA00g22870	0	0	0	0	6	2
CA00g22880	178	267	493	511	183	215
CA00g22890	11	11	14	12	10	9
CA00g24860	1	1	2	2	4	5
CA00g24870	223	154	102	101	61	71
CA00g24880	12	0	11	3	1	1
CA00g24890	24	27	84	66	22	24
CA00g24900	119	149	148	160	74	105
CA00g24910	11	24	36	36	11	16
CA00g24920	0	0	0	0	0	0
CA00g24930	332	437	635	573	269	344
CA00g24940	629	627	1170	1438	514	621
CA00g24950	0	2	0	0	5	9
CA00g24960	0	0	0	0	0	0
CA00g24970	0	0	0	0	0	0
CA00g24980	4	0	2	1	0	2
CA00g24990	9	1	3	4	1	0
CA00g25000	0	0	0	0	0	0
CA00g25010	0	0	0	0	0	0
CA00g25020	0	0	1	1	0	5
CA00g25030	21	2	5	6	0	0
CA00g25040	0	0	0	0	0	0
CA00g25050	0	0	0	0	0	0
CA00g25060	0	0	0	0	0	0
CA00g25070	109	109	118	89	39	49
CA00g25080	4	0	9	9	0	1
CA00g25090	68	37	72	73	52	54
CA00g25100	23	25	53	56	5	14
CA00g25110	0	0	0	0	0	0
CA00g25120	0	2	1	0	0	0
CA00g25130	0	0	0	0	0	0
CA00g25140	0	0	3	0	0	0
CA00g25150	106	160	183	228	64	82
CA00g25160	8	6	11	13	1	2
CA00g25170	2	2	3	1	2	5
CA00g25180	715	890	916	1165	433	538
CA00g25190	977	1139	1418	1816	532	745
CA00g25200	16	22	21	33	8	7
CA00g25210	0	0	0	7	0	0
CA00g25220	0	0	0	0	0	0
CA00g25230	542	514	780	872	214	306
CA00g25240	400	506	535	617	199	249
CA00g25250	4	0	0	0	0	0
CA00g25260	41	88	53	73	16	30
CA00g25270	91	119	173	148	54	84
CA00g25280	24	55	55	63	37	37
CA00g25290	0	0	0	0	0	0
CA00g25300	45	45	100	113	27	33
CA00g25310	122	156	216	265	90	117
CA00g25320	0	0	0	0	0	0
CA00g25330	0	0	1	0	0	0
CA00g25340	0	0	1	0	0	0
CA00g25350	157	219	247	283	103	113
CA00g25360	0	0	0	0	0	0
CA00g25370	0	0	0	0	1	0
CA00g25380	13	15	100	91	40	43
CA00g25390	0	0	0	0	0	0
CA00g25400	0	0	0	0	0	0
CA00g25410	0	0	0	0	0	0
CA00g25420	0	0	0	0	0	0
CA00g25430	0	0	0	0	0	0
CA00g25440	626	582	940	1146	396	543
CA00g25450	312	404	554	666	259	340
CA00g25460	0	0	0	0	0	0
CA00g25470	838	1164	1233	1090	526	667
CA00g25480	26	16	53	62	5	6
CA00g25490	36	82	54	50	17	25
CA00g25500	42	70	53	56	18	22
CA00g25510	26	52	97	102	44	46
CA00g25520	31	50	76	71	35	35
CA00g25530	20	10	37	31	18	32
CA00g25540	86	160	195	168	111	133
CA00g25550	0	0	0	4	6	3
CA00g25560	0	0	0	0	0	0
CA00g25570	0	0	0	0	0	0
CA00g25580	0	0	0	0	0	0
CA00g25590	0	0	0	2	0	0
CA00g25600	0	0	0	0	0	0
CA00g25610	38	39	36	60	43	44
CA00g25620	0	0	0	0	0	0
CA00g25930	22	46	95	97	20	30
CA00g25940	594	651	910	932	379	465
CA00g25950	12	7	18	12	0	2
CA00g25960	172	256	274	322	149	240
CA00g26880	0	0	0	0	0	0
CA00g26890	0	0	0	0	0	0
CA00g26900	52	65	62	107	44	45
CA00g26910	1748	2071	2449	2395	996	1256
CA00g26920	656	805	953	997	397	591
CA00g26930	655	858	935	927	475	542
CA00g26940	431	772	715	745	343	392
CA00g26950	0	0	0	0	0	0
CA00g26960	0	0	0	3	0	0
CA00g26970	0	0	0	0	0	0
CA00g26980	15	4	2	5	9	7
CA00g26990	0	0	0	0	0	0
CA00g27490	0	0	1	0	0	0
CA00g27500	7	12	1	6	2	6
CA00g27510	11	2	8	0	4	1
CA00g27520	4	1	0	14	1	4
CA00g27530	0	0	0	0	0	0
CA00g28740	0	0	5	0	9	13
CA00g28750	1	2	0	0	0	4
CA00g28760	0	0	0	1	0	0
CA00g28770	143	166	267	249	84	104
CA00g28780	427	712	978	860	346	454
CA00g28790	223	397	544	528	223	266
CA00g28800	60	83	95	68	56	65
CA00g28810	0	0	0	0	0	0
CA00g28820	0	1	0	5	0	0
CA00g28830	74	103	162	160	88	84
CA00g28840	0	10	8	17	4	5
CA00g28850	1	5	0	2	0	0
CA00g28860	0	0	0	0	0	0
CA00g28870	0	0	0	0	0	0
CA00g28880	4	0	0	11	0	0
CA00g28890	5	0	0	0	0	0
CA00g28900	2065	2213	2968	3022	1326	1740
CA00g28910	139	193	179	267	71	92
CA00g28920	0	0	0	0	0	0
CA00g28930	60	72	334	537	134	178
CA00g28940	0	0	0	0	0	0
CA00g28950	11	19	37	19	16	16
CA00g28960	13	6	9	12	7	6
CA00g28970	872	1027	1862	2329	807	1039
CA00g29410	0	0	0	0	0	0
CA00g29420	0	0	0	0	0	0
CA00g29430	0	0	0	0	0	0
CA00g29440	0	0	0	0	0	0
CA00g29450	0	0	0	0	0	0
CA00g29460	0	0	0	0	0	0
CA00g29470	0	2	2	10	15	13
CA00g29480	0	0	0	0	0	0
CA00g29490	0	0	0	0	0	0
CA00g29500	0	1	0	0	0	0
CA00g29510	0	0	0	1	3	0
CA00g29520	0	0	0	0	0	0
CA00g29530	0	0	1	0	0	0
CA00g29540	0	0	0	3	1	0
CA00g29550	0	0	0	0	0	0
CA00g29560	0	0	0	0	0	0
CA00g29570	0	0	0	0	0	0
CA00g29580	0	0	0	0	0	0
CA00g29590	0	0	0	2	0	0
CA00g29600	0	0	0	0	0	0
CA00g29610	0	0	3	0	0	0
CA00g29620	0	7	0	0	0	0
CA00g29630	9	6	7	8	3	11
CA00g29640	0	0	0	0	0	0
CA00g29650	1	7	2	12	8	8
CA00g29660	0	1	5	3	1	3
CA00g29670	0	0	0	0	0	0
CA00g29680	123	145	274	263	90	126
CA00g29690	16	43	32	65	11	13
CA00g29700	1476	2200	2483	2551	1033	1360
CA00g29710	0	0	0	0	0	0
CA00g29720	0	1	0	0	0	0
CA00g29730	0	0	0	0	0	0
CA00g29740	245	194	310	268	84	105
CA00g29750	0	0	1	0	0	0
CA00g29760	0	0	0	0	0	0
CA00g29770	0	0	0	0	0	0
CA00g29780	0	0	4	1	0	0
CA00g29790	0	0	0	0	0	0
CA00g29800	732	941	1499	1527	598	765
CA00g29810	4	1	6	11	1	6
CA00g29820	1	3	0	0	0	0
CA00g29830	285	331	470	467	165	162
CA00g29840	0	0	0	0	0	0
CA00g29850	9	9	4	9	13	8
CA00g29860	13	1	24	5	4	3
CA00g29870	85	83	169	157	74	91
CA00g29880	0	0	0	0	2	1
CA00g29890	21	23	53	119	42	40
CA00g29900	0	0	0	0	0	0
CA00g29910	3	0	2	0	2	3
CA00g29920	0	0	0	0	2	6
CA00g29930	1	0	2	0	0	0
CA00g29940	5	4	1	6	0	0
CA00g29950	1	3	2	4	0	0
CA00g29960	0	1	0	3	0	0
CA00g29970	944	1275	1736	1586	742	916
CA00g29980	158	162	256	274	105	135
CA00g29990	98	130	191	147	65	69
CA00g30000	1	3	9	4	2	2
CA00g30010	55	112	114	169	79	69
CA00g30020	5	9	7	33	13	7
CA00g30030	17	28	17	24	7	22
CA00g30040	0	0	0	0	0	0
CA00g30050	0	0	0	0	0	0
CA00g30060	165	237	457	385	184	199
CA00g30070	7	3	9	15	3	3
CA00g30080	0	0	0	0	0	0
CA00g30090	0	0	0	0	0	0
CA00g30100	281	438	591	509	279	362
CA00g30110	48	109	142	73	45	47
CA00g30120	0	0	0	0	0	0
CA00g30130	0	0	0	0	0	0
CA00g30140	0	0	0	0	0	0
CA00g30150	30	23	33	46	10	5
CA00g30160	0	0	0	0	0	0
CA00g30170	0	0	0	0	0	0
CA00g30180	0	0	0	2	0	0
CA00g30190	6	7	22	20	19	14
CA00g30200	12	1	12	13	8	10
CA00g30210	6070	12513	9974	8705	3443	4313
CA00g30220	432	541	635	678	190	284
CA00g30230	3	0	5	4	0	1
CA00g30240	51	92	128	165	19	25
CA00g30250	0	0	0	1	0	0
CA00g31240	409	466	819	752	289	385
CA00g31250	0	1	0	0	0	0
CA00g31260	173	254	274	299	65	86
CA00g31270	212	221	260	389	154	205
CA00g31280	0	0	0	0	0	0
CA00g31290	1303	1973	1949	1771	854	1036
CA00g31300	84	145	69	85	15	29
CA00g31310	8	4	8	11	3	3
CA00g31320	51	101	59	53	59	52
CA00g31330	159	179	175	170	59	93
CA00g31340	0	0	0	0	0	0
CA00g31350	6	11	13	17	5	10
CA00g31360	5	1	2	2	4	2
CA00g31370	114	66	135	186	44	59
CA00g31380	37	54	95	98	33	41
CA00g31390	147	163	193	180	102	92
CA00g31400	59	95	75	69	35	45
CA00g32320	709	921	1248	1101	443	561
CA00g32330	0	0	0	0	0	0
CA00g32340	0	0	0	0	0	0
CA00g32350	0	2	0	0	0	0
CA00g32360	18	17	88	119	41	47
CA00g32370	0	0	0	0	0	0
CA00g32380	3	5	0	0	0	0
CA00g32390	203	267	282	238	107	149
CA00g32400	937	1054	1530	1585	661	740
CA00g32410	495	621	810	874	308	384
CA00g32420	288	311	339	331	144	166
CA00g32430	161	124	204	297	94	116
CA00g32440	2217	2871	2844	2755	1015	1301
CA00g32450	12	13	22	64	5	7
CA00g32460	154	86	223	263	60	79
CA00g32470	5	3	111	93	21	19
CA00g32480	165	147	205	202	85	117
CA00g32490	273	379	496	585	204	222
CA00g32500	87	62	100	112	13	17
CA00g32510	727	1012	1115	1046	454	562
CA00g32520	29	18	41	45	11	9
CA00g32530	0	0	0	0	0	0
CA00g32540	94	151	123	74	56	72
CA00g32550	83	112	182	169	75	81
CA00g32560	514	734	759	697	286	462
CA00g32570	12	6	10	5	0	0
CA00g32580	193	215	189	198	67	134
CA00g32590	13	28	61	71	17	26
CA00g32600	76	104	80	135	34	47
CA00g32610	0	0	0	0	0	0
CA00g32620	0	0	0	0	0	0
CA00g32630	0	0	0	0	0	0
CA00g32640	1363	1411	2203	2720	1020	1126
CA00g32650	0	1	3	0	1	0
CA00g32660	0	1	3	0	0	1
CA00g32670	143	214	250	215	151	204
CA00g32680	0	8	0	2	3	1
CA00g32690	0	0	0	0	0	0
CA00g32700	2	10	0	0	1	2
CA00g32710	0	0	0	0	0	0
CA00g32720	0	0	8	6	0	0
CA00g32730	516	537	746	719	265	369
CA00g32740	545	614	920	888	340	439
CA00g32750	1842	2394	3132	3593	1579	2183
CA00g32760	2498	2792	4450	4967	1866	2432
CA00g32770	262	281	452	480	282	299
CA00g32780	193	220	389	352	158	196
CA00g32790	500	593	1064	1066	360	457
CA00g32800	4	1	2	12	7	5
CA00g32810	0	0	0	0	0	0
CA00g32820	0	0	0	1	0	0
CA00g32830	0	2	3	3	1	0
CA00g32840	11	9	15	34	7	14
CA00g32850	0	0	0	0	0	0
CA00g32860	0	0	1	0	0	0
CA00g32870	0	0	0	0	0	0
CA00g32880	0	0	0	0	0	0
CA00g32890	0	0	0	2	0	0
CA00g32900	1	10	7	23	7	4
CA00g32910	0	0	0	0	0	0
CA00g32920	0	0	0	0	0	0
CA00g32930	0	7	7	7	10	8
CA00g32940	0	0	0	0	0	0
CA00g32950	2	0	0	0	0	0
CA00g32960	76	136	141	164	58	73
CA00g32970	2	0	0	0	0	0
CA00g32980	168	297	393	505	146	136
CA00g32990	70	81	128	103	23	52
CA00g33000	0	0	0	0	0	0
CA00g33010	0	0	0	0	1	4
CA00g33020	4	8	36	30	12	8
CA00g33030	275	331	551	595	209	260
CA00g33040	1249	1336	2182	2245	947	1325
CA00g33050	303	399	556	408	225	261
CA00g33060	0	0	3	11	12	12
CA00g33070	335	405	625	613	285	343
CA00g33080	0	0	0	0	0	0
CA00g33090	61	124	125	131	32	49
CA00g33100	25	49	78	39	15	15
CA00g33110	542	567	582	573	245	320
CA00g33120	0	0	3	7	3	5
CA00g33130	632	972	1252	1294	511	619
CA00g33140	1087	1364	1966	1813	782	954
CA00g33150	70	78	80	23	29	39
CA00g33160	727	1056	1062	1236	493	625
CA00g33170	1095	1276	2350	3183	1104	1484
CA00g34300	0	0	0	0	0	0
CA00g34310	0	0	0	0	0	0
CA00g34560	0	0	0	0	0	0
CA00g34570	0	0	0	0	0	0
CA00g34580	0	0	0	0	0	0
CA00g34590	0	0	0	0	0	0
CA00g34600	0	0	0	0	0	0
CA00g34610	0	0	0	0	0	0
CA00g34620	0	0	0	0	0	0
CA00g34630	0	0	0	0	0	0
CA00g34640	0	0	0	0	0	0
CA00g34650	0	0	0	0	0	0
CA00g34660	2	0	0	0	0	0
CA00g34670	0	0	0	0	0	0
CA00g34680	33	52	47	31	23	30
CA00g34690	0	0	0	0	0	0
CA00g34700	128	179	226	281	103	129
CA00g34710	13	6	25	35	6	4
CA00g34720	4	12	19	5	1	4
CA00g34730	3	1	0	0	0	1
CA00g34740	916	1067	1328	1284	593	726
CA00g34750	15	1	8	4	4	4
CA00g34760	4	0	2	7	1	0
CA00g34770	740	1164	1145	1007	501	655
CA00g34780	80	88	104	91	22	41
CA00g34790	9	5	2	7	0	1
CA00g34800	0	2	1	17	7	6
CA00g34810	0	0	0	0	0	0
CA00g34820	0	0	0	0	0	0
CA00g34830	6	3	0	0	1	1
CA00g34840	8	22	25	15	2	5
CA00g34850	0	5	0	1	0	4
CA00g36180	0	0	0	0	0	0
CA00g36190	0	0	0	0	0	0
CA00g36200	1593	1648	2877	3182	1040	1284
CA00g36210	53	59	105	90	34	59
CA00g36220	0	6	4	2	5	7
CA00g36230	0	0	0	0	0	0
CA00g36240	3	4	7	3	3	7
CA00g36250	0	0	0	0	0	0
CA00g36260	36	42	71	77	17	14
CA00g36270	275	273	476	600	178	195
CA00g36280	0	0	0	0	0	0
CA00g36290	1	0	2	0	2	2
CA00g36460	0	0	0	6	3	4
CA00g36470	1	0	0	0	0	0
CA00g36480	0	0	0	0	0	0
CA00g36490	2	0	1	0	0	0
CA00g36500	0	0	0	0	0	0
CA00g36510	784	1060	908	659	502	638
CA00g36520	152	168	246	163	81	112
CA00g36530	0	0	0	1	0	0
CA00g36540	857	807	1864	1928	801	953
CA00g36550	222	241	511	348	140	192
CA00g36560	101	66	177	192	43	72
CA00g36570	1759	1917	2971	3236	1191	1458
CA00g36580	68	104	118	133	68	100
CA00g36590	56	37	60	36	30	26
CA00g36600	0	0	0	1	0	0
CA00g36610	38	10	40	48	13	12
CA00g36620	0	0	0	0	0	0
CA00g36630	0	0	0	0	0	0
CA00g36640	142	238	344	308	139	176
CA00g36650	1770	2487	3180	2936	1233	1491
CA00g36660	0	10	9	23	4	7
CA00g36670	190	38	111	72	27	24
CA00g36680	4	0	14	8	0	0
CA00g36690	313	206	294	332	152	207
CA00g36700	60	70	116	150	42	70
CA00g36710	196	154	237	224	94	142
CA00g36720	210	242	395	500	180	179
CA00g36730	309	425	548	513	190	224
CA00g36740	113	160	220	232	74	125
CA00g36750	82	71	103	135	51	80
CA00g36760	44	42	38	90	24	38
CA00g36770	0	0	0	0	0	0
CA00g36780	12	10	32	17	4	4
CA00g36790	68	107	154	121	57	62
CA00g36800	625	763	814	783	304	349
CA00g36810	0	0	0	0	0	0
CA00g36820	8	9	36	34	11	12
CA00g36830	16	30	23	21	9	11
CA00g36840	0	0	0	6	3	5
CA00g36850	238	314	441	391	208	251
CA00g36860	82	89	219	197	59	88
CA00g36870	548	593	804	972	331	428
CA00g36880	174	155	210	163	160	147
CA00g36890	15	7	15	13	2	7
CA00g36900	0	0	0	0	0	0
CA00g36910	213	189	257	292	139	176
CA00g36920	831	871	1326	1268	577	769
CA00g36930	0	3	0	2	1	0
CA00g36940	0	0	0	0	0	0
CA00g39890	0	0	0	0	0	0
CA00g39900	0	0	0	0	0	0
CA00g39910	0	0	1	17	0	0
CA00g39920	2	1	0	3	0	0
CA00g39930	0	0	0	0	0	0
CA00g40890	0	0	0	0	0	0
CA00g40900	5	0	6	13	9	22
CA00g40910	0	0	0	0	0	0
CA00g40920	22	30	50	32	26	28
CA00g40930	14	43	33	25	13	14
CA00g40940	540	666	946	1212	278	402
CA00g40950	72	96	134	99	55	55
CA00g40960	3	19	33	29	0	0
CA00g40970	0	0	0	0	0	0
CA00g40980	923	1306	1480	1395	797	929
CA00g40990	0	0	0	0	0	0
CA00g41000	106	91	119	178	52	55
CA00g41010	0	0	0	0	0	0
CA00g41020	0	0	0	0	0	0
CA00g41030	0	0	0	0	0	0
CA00g41040	0	0	0	0	0	0
CA00g41050	1732	2220	2461	2889	897	1288
CA00g41060	2110	2659	3666	4125	1969	2490
CA00g41070	1046	1414	1420	1310	524	725
CA00g41080	296	333	347	430	85	87
CA00g41090	0	0	0	0	0	0
CA00g41100	3	0	0	0	0	0
CA00g41110	0	0	0	0	0	0
CA00g41120	57	68	50	90	58	62
CA00g41130	0	0	0	0	0	0
CA00g41140	0	0	0	0	0	0
CA00g41150	25	19	41	31	26	12
CA00g41160	585	606	692	703	208	304
CA00g41170	125	124	166	174	108	95
CA00g41180	1153	1352	1814	1844	714	950
CA00g41190	15	9	13	30	5	17
CA00g41200	59	56	164	125	55	74
CA00g41210	25	29	15	40	9	24
CA00g41220	18	9	27	34	0	1
CA00g41230	1157	1016	1938	1768	634	856
CA00g41240	96	152	180	251	81	102
CA00g41250	0	0	7	0	0	0
CA00g41260	164	297	265	326	79	102
CA00g41270	580	590	761	923	251	369
CA00g41280	0	0	5	0	0	0
CA00g41290	0	0	0	5	0	0
CA00g41300	0	0	0	0	0	0
CA00g41310	1	0	4	0	4	5
CA00g41320	9	16	28	25	4	3
CA00g41330	452	560	658	673	288	367
CA00g41340	0	0	0	0	0	0
CA00g41350	12	18	77	56	87	117
CA00g41360	7	23	43	28	4	3
CA00g41370	204	283	336	429	137	152
CA00g41380	539	770	1354	1247	520	580
CA00g41390	823	1160	1252	1257	515	707
CA00g41400	143	175	230	207	78	81
CA00g41410	87	96	119	111	68	100
CA00g41420	4	1	1	2	0	0
CA00g41430	4	4	7	3	10	18
CA00g41440	112	153	177	225	72	109
CA00g41450	7	14	10	16	5	10
CA00g41460	0	0	0	3	0	0
CA00g41470	441	607	877	898	376	481
CA00g41480	143	115	161	169	58	71
CA00g41490	487	594	663	677	276	326
CA00g41500	254	265	330	348	191	224
CA00g41510	118	176	189	162	60	79
CA00g41520	217	227	274	317	124	163
CA00g41530	322	368	508	584	232	297
CA00g41540	35	48	142	97	37	30
CA00g41550	48	75	87	91	55	77
CA00g41560	0	0	0	0	0	0
CA00g41780	59	66	88	56	32	46
CA00g41790	0	0	0	0	0	0
CA00g41940	35	120	128	78	22	25
CA00g41950	0	0	0	0	0	0
CA00g41960	0	0	0	0	0	0
CA00g42430	2	17	27	9	2	2
CA00g42440	37	31	35	23	9	12
CA00g42450	2	4	6	13	2	0
CA00g42460	0	0	0	0	0	0
CA00g42470	44	35	253	370	16	14
CA00g42480	0	0	0	0	0	0
CA00g42490	94	154	189	149	73	91
CA00g42500	0	0	0	0	0	0
CA00g42510	0	0	0	0	0	0
CA00g42520	111	161	145	126	102	98
CA00g42530	262	250	245	334	125	161
CA00g42540	0	0	0	0	0	0
CA00g42910	101	137	173	171	75	84
CA00g42920	0	0	0	0	0	0
CA00g42930	4322	4590	5002	5551	2160	2885
CA00g42940	269	321	528	464	191	301
CA00g42950	0	0	0	0	0	0
CA00g42960	544	641	881	1039	327	458
CA00g42970	634	604	756	680	296	428
CA00g42980	7	3	2	8	7	0
CA00g42990	5	21	37	26	26	34
CA00g43000	769	912	1228	1311	572	749
CA00g43010	758	876	1284	1230	359	381
CA00g43020	671	894	891	899	379	509
CA00g43030	14	39	16	8	8	13
CA00g43040	155	171	394	440	165	209
CA00g43050	1648	2040	2501	2573	1125	1516
CA00g43060	0	0	0	0	0	0
CA00g43070	92	68	190	226	55	63
CA00g43080	0	0	0	0	0	0
CA00g43090	0	0	0	6	2	3
CA00g43100	156	166	194	179	83	116
CA00g43110	2293	3511	3182	3475	1458	1830
CA00g43120	219	239	278	368	159	174
CA00g43130	0	0	0	0	0	0
CA00g43140	9	2	0	0	0	0
CA00g43150	0	0	0	0	0	0
CA00g43160	0	0	0	0	0	0
CA00g43170	16	17	38	59	2	7
CA00g43180	141	160	192	214	92	102
CA00g43190	0	0	0	0	0	0
CA00g43200	0	0	0	0	0	0
CA00g43210	21	21	35	42	14	21
CA00g43220	0	0	7	10	0	0
CA00g43230	478	554	582	808	270	322
CA00g43760	0	0	0	1	0	0
CA00g43770	0	0	0	0	0	0
CA00g43780	1	3	3	1	1	3
CA00g43790	1	0	1	4	0	0
CA00g43800	0	0	0	9	2	7
CA00g43810	3	1	0	0	1	0
CA00g43820	1237	1495	2251	1881	876	1030
CA00g43830	0	0	0	0	0	0
CA00g43840	1	7	19	27	7	10
CA00g43850	1	4	5	3	20	23
CA00g43860	291	250	437	459	218	282
CA00g43870	132	176	222	247	130	167
CA00g43880	1	0	11	1	1	5
CA00g43890	1186	1536	1739	1802	782	957
CA00g43900	0	0	0	0	0	0
CA00g43910	0	0	0	0	0	0
CA00g43920	1	3	6	2	1	0
CA00g43930	471	492	790	653	256	364
CA00g43940	32	69	53	45	21	24
CA00g43950	0	12	24	16	8	14
CA00g43960	0	0	0	0	0	0
CA00g43970	0	0	0	0	0	0
CA00g43980	0	0	0	0	0	0
CA00g43990	3	3	7	5	0	1
CA00g44000	0	0	0	0	0	0
CA00g44010	1079	1196	1638	1741	681	875
CA00g44020	209	346	438	575	180	282
CA00g44030	43	51	110	65	29	34
CA00g44040	188	221	273	330	117	165
CA00g44050	25	23	26	36	22	23
CA00g44060	0	0	0	0	0	0
CA00g44070	814	797	1166	1222	475	623
CA00g44080	124	137	171	130	64	88
CA00g44090	70	116	155	109	72	86
CA00g44100	165	216	307	344	118	140
CA00g44110	3	0	0	0	0	0
CA00g44120	6	0	1	0	2	6
CA00g44340	10	2	5	3	1	2
CA00g44350	20	17	34	19	4	5
CA00g44360	0	0	0	0	0	0
CA00g44370	0	0	0	0	0	0
CA00g44380	0	0	0	0	0	0
CA00g44390	0	0	0	0	0	0
CA00g44640	0	0	0	0	0	0
CA00g44650	0	0	104	111	21	23
CA00g44660	0	0	0	10	0	0
CA00g44670	378	440	533	670	235	258
CA00g44680	558	741	898	1132	695	783
CA00g44690	660	818	1003	887	324	424
CA00g44700	312	333	581	560	184	220
CA00g44710	5	7	9	1	1	1
CA00g44720	200	243	292	287	95	160
CA00g44730	31	32	38	48	17	24
CA00g45170	10	21	17	40	5	4
CA00g45180	0	0	0	0	0	0
CA00g45190	352	288	714	644	271	335
CA00g45200	95	106	162	172	49	50
CA00g45210	543	719	841	907	379	471
CA00g45220	10497	13179	14661	14546	6262	8591
CA00g45230	24	26	71	88	34	58
CA00g45240	5	7	17	22	6	17
CA00g45250	838	856	3760	3457	2498	2865
CA00g45260	657	651	722	892	272	299
CA00g45270	17	23	9	11	8	15
CA00g45280	1	15	21	18	7	7
CA00g45290	25	28	29	45	17	18
CA00g45300	93	149	112	163	65	77
CA00g45310	180	232	281	301	137	160
CA00g45320	4229	4508	8301	10690	3487	4258
CA00g45330	1223	2090	2023	1686	851	1177
CA00g45340	478	646	845	989	353	503
CA00g45350	744	888	1043	1080	531	693
CA00g45360	0	0	0	0	0	0
CA00g45370	0	0	0	0	0	0
CA00g45380	1236	1537	2051	1961	742	906
CA00g45390	0	1	0	0	0	0
CA00g45400	14	7	41	9	1	5
CA00g45410	288	375	530	504	212	297
CA00g45420	170	176	346	281	110	144
CA00g45430	103	164	267	241	97	107
CA00g45440	0	0	0	0	0	0
CA00g45450	1	0	0	1	0	0
CA00g45460	0	0	0	0	0	0
CA00g45470	0	0	0	0	0	0
CA00g45480	0	0	0	0	0	0
CA00g45490	0	1	0	5	0	0
CA00g45500	0	0	0	5	0	0
CA00g45510	0	0	0	0	0	0
CA00g45520	54	79	64	53	24	31
CA00g45530	0	0	0	8	3	5
CA00g45540	0	0	0	0	2	1
CA00g45550	16	15	27	56	16	19
CA00g45560	0	3	0	1	0	1
CA00g45570	5	0	8	6	3	2
CA00g45580	0	1	8	5	2	0
CA00g45590	0	0	106	82	52	59
CA00g46070	0	1	0	0	0	0
CA00g46080	996	1374	1244	1446	689	825
CA00g46090	2	7	11	40	7	13
CA00g46100	397	432	442	482	199	280
CA00g46110	1215	1075	1816	1956	787	1059
CA00g46120	4	0	9	0	0	1
CA00g46130	459	672	577	712	316	427
CA00g46140	5	6	2	2	0	0
CA00g46150	178	188	202	237	106	116
CA00g46160	368	477	417	359	156	174
CA00g46170	0	0	0	0	0	0
CA00g46180	0	0	0	0	0	0
CA00g46190	0	0	0	0	0	0
CA00g46200	324	452	642	681	218	341
CA00g46210	2	2	7	9	0	0
CA00g46220	0	0	0	0	0	0
CA00g46230	732	1029	1363	1991	627	783
CA00g46240	0	0	0	0	0	0
CA00g46250	0	0	0	0	0	0
CA00g46260	0	0	0	0	0	0
CA00g46270	0	0	0	0	0	0
CA00g46670	218	323	306	266	91	107
CA00g46680	135	215	292	236	115	131
CA00g46770	23	14	21	26	16	13
CA00g46780	4	11	10	8	4	4
CA00g46790	31	67	87	106	39	49
CA00g46800	44	70	47	103	26	44
CA00g46810	112	115	173	115	29	39
CA00g46820	1123	1476	2127	2199	906	1066
CA00g46830	314	447	471	548	103	127
CA00g46840	0	0	1	0	0	0
CA00g46850	43	39	159	131	98	117
CA00g46860	74	106	188	176	75	106
CA00g46870	179	215	323	356	116	170
CA00g46880	0	0	0	0	0	0
CA00g46890	0	0	1	3	5	6
CA00g46900	120	205	316	322	176	199
CA00g46910	8	9	12	7	2	1
CA00g47390	120	196	273	346	123	151
CA00g47400	0	8	3	0	0	0
CA00g47410	195	228	230	227	126	188
CA00g47420	9	4	0	4	3	0
CA00g47430	0	0	2	0	0	0
CA00g47440	0	0	3	1	0	2
CA00g47450	0	1	1	0	0	0
CA00g47460	0	0	0	0	0	0
CA00g47470	6	8	9	6	2	3
CA00g47480	13	17	15	19	17	22
CA00g47490	834	993	2450	1672	797	946
CA00g47500	54	62	133	145	46	59
CA00g47510	45	44	84	67	18	33
CA00g47520	0	0	0	0	0	0
CA00g47530	3	0	0	2	0	1
CA00g47540	138	117	270	179	97	146
CA00g47550	74	45	71	88	44	61
CA00g47560	1	0	0	0	0	0
CA00g47570	0	0	0	0	0	0
CA00g47580	14	7	4	9	5	10
CA00g48500	140	155	486	491	277	324
CA00g49150	0	0	0	0	0	0
CA00g49160	0	0	0	0	0	0
CA00g49170	0	0	0	0	0	0
CA00g49180	0	0	0	0	0	0
CA00g49190	0	1	0	0	0	0
CA00g49200	7	18	11	10	6	15
CA00g49210	9	0	4	13	0	0
CA00g49220	0	0	0	0	0	0
CA00g49230	0	0	0	0	0	0
CA00g49240	0	0	0	0	0	0
CA00g49250	0	0	0	0	0	0
CA00g49260	0	0	0	0	0	0
CA00g49270	2	9	5	14	19	7
CA00g49280	243	395	420	449	231	270
CA00g49290	463	552	783	807	412	526
CA00g49300	0	0	0	0	0	0
CA00g49310	0	0	0	0	0	0
CA00g49320	0	0	0	0	0	0
CA00g49330	0	0	0	0	0	0
CA00g49340	2	0	2	12	1	0
CA00g49350	0	0	0	0	0	0
CA00g49360	0	1	1	0	0	0
CA00g49370	18	55	43	39	29	33
CA00g49380	18	7	72	101	49	75
CA00g49390	736	717	997	1047	419	565
CA00g49400	195	219	251	261	72	89
CA00g49410	24	38	58	43	17	24
CA00g49420	3976	4606	4876	5244	2442	3189
CA00g49430	0	0	0	0	0	0
CA00g49440	7	14	3	15	2	2
CA00g49910	0	0	0	0	0	0
CA00g49920	0	1	0	1	0	0
CA00g49930	0	0	0	0	0	0
CA00g49940	45	71	91	51	37	47
CA00g49950	0	0	0	0	0	0
CA00g49960	0	0	0	0	0	0
CA00g49970	1	0	0	0	0	0
CA00g49980	2640	3769	4204	4406	1771	2371
CA00g49990	81	68	102	115	60	60
CA00g50000	0	0	0	0	0	0
CA00g50010	0	0	0	0	0	0
CA00g50020	0	0	0	0	0	0
CA00g50030	0	0	0	0	0	0
CA00g50040	1027	1343	1754	2038	798	992
CA00g50050	1	0	0	0	0	0
CA00g50060	493	526	797	805	316	376
CA00g50070	836	946	1315	1339	615	695
CA00g50080	0	0	0	0	0	1
CA00g50090	425	359	518	562	263	330
CA00g50100	50	87	63	99	32	47
CA00g50110	0	0	0	0	0	0
CA00g50120	0	0	0	0	0	0
CA00g50130	401	576	891	972	334	423
CA00g50140	135	113	195	158	79	87
CA00g50150	0	2	0	1	0	0
CA00g50160	0	0	0	0	0	0
CA00g50170	0	0	0	0	0	0
CA00g50180	0	0	0	0	0	0
CA00g50190	0	0	0	0	0	0
CA00g50200	47	69	118	143	38	48
CA00g50210	9	12	4	7	1	3
CA00g50220	0	0	0	0	0	0
CA00g50230	8	12	112	86	19	21
CA00g50240	89	48	177	233	73	76
CA00g50250	84	122	145	124	43	56
CA00g50260	0	0	0	0	0	0
CA00g50270	47	49	74	45	37	31
CA00g50480	0	0	0	0	0	0
CA00g50490	997	1165	1822	1758	655	802
CA00g50500	1584	2085	2420	2308	1011	1216
CA00g50510	10	11	20	24	1	4
CA00g50520	1163	1444	1892	2100	777	927
CA00g50530	1633	1376	2781	2780	1447	1909
CA00g50540	417	499	670	710	261	339
CA00g50550	161	207	324	338	138	196
CA00g50560	291	255	526	614	174	271
CA00g50570	28	17	33	29	8	10
CA00g50580	0	0	0	0	0	0
CA00g50590	3	0	0	0	0	0
CA00g51850	0	0	0	0	0	0
CA00g51860	180	215	375	345	127	149
CA00g51870	35	34	112	107	53	66
CA00g51880	36	39	73	71	42	44
CA00g51890	0	3	2	0	1	1
CA00g51900	1378	1404	2602	3249	948	1321
CA00g51910	60	79	92	155	61	75
CA00g51920	121	171	197	218	62	81
CA00g51930	43	24	29	46	17	29
CA00g51940	134	152	378	443	109	134
CA00g51950	635	548	893	923	295	383
CA00g51960	377	413	580	601	411	431
CA00g51970	0	2	3	2	0	0
CA00g51980	0	0	0	0	0	0
CA00g51990	1560	1547	2250	2263	1002	1258
CA00g52000	66	88	112	120	58	58
CA00g52010	876	1081	1532	1463	601	715
CA00g52020	0	1	3	0	0	0
CA00g52030	11	9	15	39	11	14
CA00g52040	20	18	58	38	4	8
CA00g52050	0	0	0	8	0	0
CA00g52060	16	18	43	35	26	18
CA00g52070	409	466	655	621	245	304
CA00g52080	1	2	0	2	0	0
CA00g52090	25	29	42	36	17	9
CA00g52100	1239	1367	1523	1615	608	749
CA00g52110	65	91	78	92	43	50
CA00g52120	13	8	15	14	12	17
CA00g52130	31	49	38	31	20	15
CA00g52140	12068	15586	22245	24009	7262	9101
CA00g52150	1100	1528	2229	2037	905	1121
CA00g52160	5555	7682	12891	14934	2996	3994
CA00g52170	885	1055	1205	1138	420	543
CA00g52180	5	0	3	2	0	0
CA00g52190	14	0	0	0	1	0
CA00g52200	0	0	0	0	0	0
CA00g52210	0	0	0	0	0	0
CA00g52220	308	262	383	329	148	157
CA00g52230	245	269	384	270	191	225
CA00g52240	0	0	0	0	0	0
CA00g52250	16	11	19	17	10	9
CA00g52260	0	1	0	0	0	0
CA00g52270	0	0	0	0	0	0
CA00g52280	0	0	51	12	24	45
CA00g52290	33	22	31	54	14	22
CA00g52300	418	426	576	574	322	392
CA00g52310	0	0	0	0	0	0
CA00g52320	916	1024	1347	1320	620	849
CA00g52330	561	565	851	876	317	389
CA00g52340	47	67	112	169	28	45
CA00g52350	4	22	28	7	6	3
CA00g52360	10	19	64	38	6	18
CA00g52370	1	0	1	1	0	0
CA00g52380	23	18	29	22	7	5
CA00g52390	47	32	56	80	21	24
CA00g52400	15	1	26	33	10	8
CA00g52410	67	83	97	83	21	45
CA00g52420	855	1033	782	848	427	615
CA00g52430	472	598	810	830	266	390
CA00g52440	41	68	70	30	22	21
CA00g52450	211	266	257	206	94	115
CA00g52460	3	4	3	10	4	2
CA00g52470	2	4	3	5	6	3
CA00g52480	110	157	185	168	74	99
CA00g52490	339	407	648	588	205	270
CA00g52500	0	1	0	7	0	0
CA00g52510	404	428	462	532	256	296
CA00g52520	0	0	0	0	0	0
CA00g52530	0	0	0	0	0	0
CA00g52540	1016	1147	1227	1319	604	772
CA00g52550	303	383	345	277	127	156
CA00g52560	27	30	53	82	24	38
CA00g52570	517	565	1004	978	435	581
CA00g52580	0	0	0	4	0	2
CA00g52590	9	43	28	13	7	3
CA00g52600	6	3	30	52	9	3
CA00g52610	4	14	30	7	14	18
CA00g52620	0	1	4	2	0	0
CA00g52630	0	0	1	0	0	0
CA00g52640	151	229	220	201	65	116
CA00g52650	537	551	717	704	341	489
CA00g52660	716	780	1627	1720	762	1040
CA00g52670	550	434	978	1057	370	397
CA00g52680	563	678	887	950	409	516
CA00g52690	0	0	0	0	0	0
CA00g52700	1	0	0	6	0	0
CA00g53540	24	45	30	59	9	17
CA00g53550	104	143	165	158	92	148
CA00g53560	9	16	18	58	18	10
CA00g53570	420	552	793	830	284	341
CA00g53580	104	120	123	135	55	56
CA00g53590	0	0	0	0	0	0
CA00g53600	0	0	0	0	0	0
CA00g53610	2	2	0	21	4	3
CA00g53620	76	95	213	244	61	88
CA00g53630	0	2	0	0	0	0
CA00g53640	0	0	0	0	0	0
CA00g53650	978	1490	1900	1710	700	826
CA00g53660	0	6	0	6	2	3
CA00g53670	465	434	600	444	265	317
CA00g53680	17	11	2	5	7	11
CA00g53690	0	0	0	0	0	0
CA00g53700	259	180	369	720	354	474
CA00g53710	81	66	131	177	95	128
CA00g53720	177	340	355	367	184	239
CA00g53730	0	0	0	0	0	0
CA00g53740	7	9	49	26	13	17
CA00g53750	9	13	31	21	2	3
CA00g53760	0	0	0	0	0	0
CA00g53770	141	182	285	338	133	164
CA00g53780	1712	1536	4311	3941	1959	2378
CA00g53790	328	509	590	642	232	290
CA00g53800	0	9	0	0	1	0
CA00g53810	0	0	0	0	0	0
CA00g53820	14	13	21	25	9	7
CA00g53830	1525	1929	2324	2507	938	1287
CA00g53840	98	105	142	199	58	72
CA00g53850	127	267	215	283	103	117
CA00g53860	15	9	31	6	6	9
CA00g53870	364	493	492	462	275	304
CA00g53880	352	348	624	609	380	463
CA00g53890	492	584	629	547	261	275
CA00g53900	0	1	1	0	0	0
CA00g53910	0	0	0	0	0	0
CA00g53920	4	14	8	11	5	10
CA00g53930	0	0	0	0	0	0
CA00g53940	0	2	0	0	2	7
CA00g53950	35	43	85	55	145	184
CA00g53960	2	3	0	0	0	0
CA00g53970	317	387	605	466	256	292
CA00g53980	573	745	1053	910	413	544
CA00g53990	56	56	120	126	44	53
CA00g54000	13	3	6	13	3	0
CA00g54010	17	23	32	38	17	23
CA00g54020	0	0	0	0	0	0
CA00g54030	10	10	20	10	9	13
CA00g54040	0	0	0	0	0	0
CA00g54050	91	54	94	125	73	107
CA00g54060	2348	2044	5871	5633	3221	3727
CA00g54070	4222	4988	5256	5203	2404	3150
CA00g54080	0	0	0	0	0	0
CA00g54090	0	6	19	0	4	7
CA00g54100	881	714	701	706	450	589
CA00g54110	0	0	0	0	0	0
CA00g54120	11	4	13	11	9	3
CA00g54130	342	492	524	544	222	292
CA00g54140	132	110	223	183	83	116
CA00g54150	274	389	454	488	210	284
CA00g54160	19	11	42	30	9	9
CA00g54170	1534	1881	2604	2879	1086	1418
CA00g54180	76	88	147	153	100	95
CA00g54190	5	7	4	7	6	4
CA00g54200	15	7	4	1	0	2
CA00g54210	20	8	6	4	5	9
CA00g54220	287	411	497	532	226	299
CA00g54230	0	0	0	0	0	0
CA00g54630	2	13	20	20	1	5
CA00g54640	0	9	37	11	8	4
CA00g54650	0	1	0	0	0	0
CA00g54660	249	293	479	416	172	180
CA00g54670	0	0	0	0	0	0
CA00g54680	8	19	4	21	4	4
CA00g54690	717	580	1093	1078	809	949
CA00g55780	0	0	0	0	0	0
CA00g55790	45	86	120	125	22	35
CA00g55800	1094	1333	1244	1158	607	787
CA00g55810	0	0	0	0	0	0
CA00g56330	23	6	7	12	1	2
CA00g56340	0	0	0	0	0	0
CA00g56350	1	0	0	0	0	0
CA00g56360	1002	934	1355	1547	519	640
CA00g56370	83	149	168	112	63	63
CA00g56380	0	0	0	0	0	0
CA00g56390	84	97	164	227	86	106
CA00g56400	11	15	2	34	12	28
CA00g56930	3	11	36	30	23	21
CA00g56940	0	0	0	0	0	0
CA00g56950	9	16	9	14	6	14
CA00g56960	0	0	0	0	0	0
CA00g56970	1	0	0	3	0	0
CA00g56980	0	0	0	0	0	0
CA00g56990	15	10	9	0	7	4
CA00g57030	258	257	336	349	93	126
CA00g57040	427	559	874	1056	393	593
CA00g57050	1	40	14	19	6	7
CA00g57060	0	5	2	1	0	0
CA00g57070	4	1	0	0	0	0
CA00g57080	12	3	16	29	21	29
CA00g57090	807	1181	1504	1459	480	689
CA00g57100	0	0	4	0	0	1
CA00g57110	13	14	14	36	13	19
CA00g57120	0	0	2	0	0	1
CA00g57130	1	0	0	0	0	0
CA00g57140	0	0	0	0	0	0
CA00g57150	0	0	0	0	0	0
CA00g57160	0	0	0	0	8	5
CA00g57170	10	8	16	29	2	0
CA00g57180	1227	857	1861	2308	879	1005
CA00g57190	27	13	47	48	11	23
CA00g57200	0	0	0	5	0	0
CA00g57210	1	9	3	0	0	0
CA00g57220	10	8	5	14	12	26
CA00g57230	0	0	0	0	0	0
CA00g57240	0	0	0	0	0	0
CA00g57250	0	0	0	0	0	0
CA00g57260	7	4	16	31	8	17
CA00g57270	1	1	2	0	3	0
CA00g57280	4	14	15	43	11	23
CA00g57290	0	0	0	0	0	0
CA00g57300	0	0	0	0	0	0
CA00g57310	50	49	61	89	18	31
CA00g57320	703	737	1218	1473	442	594
CA00g57330	23	56	41	36	17	24
CA00g57340	10	17	9	15	8	5
CA00g57350	1	3	15	6	2	5
CA00g57360	0	4	3	2	0	1
CA00g57370	0	0	3	0	0	0
CA00g57380	0	0	0	0	0	0
CA00g57390	0	0	0	0	0	0
CA00g57400	0	0	0	0	0	0
CA00g57410	4	2	1	0	1	0
CA00g57420	0	0	11	3	0	1
CA00g57430	2	3	4	4	0	1
CA00g57440	6	5	6	3	4	3
CA00g57450	128	177	255	238	119	133
CA00g57460	0	0	1	0	2	0
CA00g57470	779	676	832	893	535	654
CA00g57480	0	0	0	0	0	0
CA00g57490	3	0	25	4	11	14
CA00g57500	1692	2143	2399	2320	1099	1430
CA00g57510	71	86	42	65	16	36
CA00g57520	123	196	234	259	92	110
CA00g57530	14	32	27	33	24	37
CA00g57540	225	229	307	239	101	157
CA00g57550	343	322	630	659	290	359
CA00g57560	0	0	0	0	0	0
CA00g57570	0	0	0	1	0	0
CA00g57580	90	82	124	98	39	60
CA00g57590	0	0	0	0	0	0
CA00g57600	2	16	26	14	7	13
CA00g57610	0	0	8	0	3	6
CA00g57620	88	53	84	68	29	37
CA00g57630	0	0	0	0	0	0
CA00g57640	1	9	5	3	1	1
CA00g57650	6	20	4	13	1	0
CA00g57660	0	0	0	0	0	0
CA00g57670	0	0	0	0	0	0
CA00g57680	0	0	0	0	0	0
CA00g57690	0	0	0	1	0	0
CA00g57870	20	0	0	0	0	0
CA00g57880	13	6	25	19	9	12
CA00g57890	61	48	107	72	41	45
CA00g57900	209	242	309	337	117	149
CA00g57910	0	0	0	0	0	0
CA00g57920	10	4	38	19	9	9
CA00g57930	44	53	110	73	72	119
CA00g57940	5	1	0	2	1	2
CA00g57950	0	0	5	0	0	0
CA00g57960	142	154	175	158	76	82
CA00g57970	140	140	286	341	152	141
CA00g57980	55	171	236	182	63	90
CA00g57990	53	100	112	66	62	64
CA00g58000	0	0	0	0	0	0
CA00g58010	0	0	0	0	0	0
CA00g58020	3	0	0	0	0	0
CA00g58030	806	639	977	936	496	574
CA00g58040	7	7	7	16	3	2
CA00g58050	16	16	12	45	5	0
CA00g58060	115	152	286	288	116	153
CA00g58070	33	34	43	39	20	18
CA00g58080	10	8	14	10	12	13
CA00g58090	2	1	1	5	1	4
CA00g58100	3	13	34	13	17	25
CA00g58110	2	4	4	8	1	3
CA00g58120	0	0	0	5	0	0
CA00g58130	0	0	0	0	0	0
CA00g58140	0	0	0	0	0	0
CA00g58150	0	0	0	0	0	0
CA00g58160	0	0	0	0	1	2
CA00g58170	65	72	168	122	80	120
CA00g58180	145	291	447	464	116	168
CA00g58190	1	1	10	14	1	0
CA00g58200	496	910	751	823	232	270
CA00g58210	2944	2729	4245	3566	2327	2958
CA00g58220	5	3	3	0	1	1
CA00g58230	7	3	4	0	10	8
CA00g58240	0	0	0	0	0	0
CA00g58250	0	0	0	0	0	0
CA00g58260	13	6	24	12	9	3
CA00g58270	15	11	60	18	30	15
CA00g58280	0	0	0	0	0	0
CA00g58290	3	11	7	22	0	2
CA00g58300	0	0	0	0	0	0
CA00g58310	1	2	2	0	0	0
CA00g58320	5	22	21	13	3	6
CA00g58330	13	18	17	28	11	17
CA00g58340	15	21	35	65	9	11
CA00g58350	1175	1724	1661	1616	783	1031
CA00g58360	63	87	96	134	28	28
CA00g58370	236	301	366	484	139	202
CA00g58380	3	8	11	22	0	1
CA00g58390	18	12	26	39	8	11
CA00g58400	0	0	0	0	0	0
CA00g58410	347	406	486	416	229	261
CA00g58420	234	249	290	267	45	58
CA00g58430	0	0	0	0	0	0
CA00g58440	0	0	0	0	0	0
CA00g58450	0	0	0	0	0	0
CA00g58460	3	4	0	0	1	3
CA00g58470	208	162	289	357	115	132
CA00g58480	75	119	117	108	42	67
CA00g58490	832	880	1260	1330	478	566
CA00g58500	713	809	716	744	290	381
CA00g58510	0	0	0	4	1	0
CA00g58520	3097	4472	4854	5169	1864	2343
CA00g58530	1632	1682	1708	2026	852	1106
CA00g58540	22	11	7	19	0	6
CA00g58550	82	75	191	176	107	110
CA00g58560	50	33	48	51	17	29
CA00g58570	0	0	0	0	0	0
CA00g58580	0	10	0	0	0	0
CA00g58590	0	0	0	0	0	0
CA00g58600	0	0	0	14	0	0
CA00g58610	0	0	0	0	0	0
CA00g58620	0	0	0	0	0	0
CA00g58630	0	0	0	0	0	0
CA00g58640	0	0	1	0	4	4
CA00g58650	0	0	0	0	0	0
CA00g58660	7630	11422	14031	14539	5521	7213
CA00g58670	0	20	4	0	2	0
CA00g58680	0	0	0	0	0	0
CA00g58690	0	0	0	0	0	0
CA00g58700	0	0	0	0	0	0
CA00g58710	0	0	0	0	0	0
CA00g58720	0	0	0	0	0	0
CA00g58730	0	0	0	0	0	0
CA00g58740	0	0	1	1	0	0
CA00g58750	0	0	0	0	0	0
CA00g58760	0	0	0	0	0	0
CA00g58770	0	0	0	0	0	0
CA00g58780	0	0	0	0	0	0
CA00g58790	0	2	0	0	0	0
CA00g58800	379	271	395	453	173	232
CA00g58810	0	0	0	0	0	0
CA00g58820	0	0	0	0	0	0
CA00g59290	219	258	353	298	129	164
CA00g59300	521	756	1127	1089	421	488
CA00g59310	1231	1383	1862	2292	829	1069
CA00g59320	5	1	4	7	1	1
CA00g59330	16	24	86	105	37	46
CA00g59340	239	312	619	610	262	362
CA00g59350	0	3	20	15	6	8
CA00g59360	399	329	692	570	290	361
CA00g59370	23	21	76	78	30	16
CA00g59380	26	38	51	62	13	13
CA00g59390	49	38	186	148	59	77
CA00g59400	5779	5852	9588	9684	2985	4055
CA00g59410	218	213	435	515	196	223
CA00g59420	0	0	0	0	0	0
CA00g59430	2	5	6	0	2	1
CA00g59440	0	0	0	3	1	0
CA00g59450	3	0	0	0	0	0
CA00g59690	2	0	0	0	0	0
CA00g59700	8	10	10	4	3	3
CA00g59710	0	0	0	0	0	0
CA00g59720	5	5	9	4	1	0
CA00g60360	7	15	5	1	6	4
CA00g60370	0	6	1	17	0	0
CA00g60380	63	50	82	77	19	23
CA00g60390	146	217	281	289	81	140
CA00g60400	13	4	4	36	4	2
CA00g60410	0	0	0	0	0	0
CA00g60420	44	66	98	57	50	65
CA00g60430	28	16	13	17	7	12
CA00g60440	6	5	19	17	4	6
CA00g60450	9834	12678	12641	12679	5436	6858
CA00g60460	226	254	204	211	85	119
CA00g60470	2507	3144	4393	4009	1462	1799
CA00g60480	1907	2097	3077	3399	1189	1534
CA00g60490	7	12	2	3	1	2
CA00g60500	293	403	375	361	166	248
CA00g60510	257	316	412	367	183	243
CA00g60520	4688	4305	7980	10874	2999	4432
CA00g60530	741	845	1162	1189	417	528
CA00g60540	490	465	893	1299	561	723
CA00g60550	96	102	150	131	70	89
CA00g60560	291	662	442	425	207	243
CA00g60570	0	0	0	0	0	0
CA00g60580	41	112	97	146	77	117
CA00g60590	905	1138	1879	2180	862	1027
CA00g60600	507	785	1068	946	386	544
CA00g60610	1	0	0	0	0	0
CA00g60620	0	0	0	1	1	2
CA00g60630	5	9	1	5	4	5
CA00g61190	0	0	0	1	0	0
CA00g61200	0	0	0	0	1	0
CA00g61210	0	0	0	0	0	0
CA00g61220	2	2	4	2	1	6
CA00g61450	0	13	12	1	2	5
CA00g61460	0	0	0	0	0	3
CA00g61470	25	34	42	37	14	19
CA00g61480	1069	1081	1878	2137	906	1134
CA00g61490	2	2	9	12	7	10
CA00g61500	1221	1426	1651	1795	1173	1279
CA00g61510	0	0	0	0	0	0
CA00g61520	0	0	0	0	0	0
CA00g61530	0	0	0	0	0	0
CA00g61540	0	0	0	0	0	0
CA00g61550	0	0	0	0	0	0
CA00g61560	191	199	289	329	57	85
CA00g61570	40	65	70	57	33	44
CA00g61580	10	6	28	14	36	39
CA00g61590	4	6	10	4	7	7
CA00g61600	0	2	0	0	0	0
CA00g61610	1	0	3	0	6	11
CA00g61620	0	0	0	0	2	0
CA00g61630	3	7	7	8	3	9
CA00g61640	18	20	109	61	31	34
CA00g61650	4	13	9	7	1	1
CA00g61660	0	0	1	0	0	0
CA00g61670	0	0	0	0	0	0
CA00g61680	0	0	0	0	0	0
CA00g61690	36	42	80	74	20	19
CA00g61700	85	85	143	157	51	62
CA00g61710	0	0	0	0	0	0
CA00g61720	0	0	0	0	0	0
CA00g61730	0	0	0	0	0	0
CA00g61740	655	891	1391	1823	766	880
CA00g61750	1589	1719	2142	2275	829	948
CA00g61760	0	0	0	0	0	0
CA00g61770	0	0	1	0	5	1
CA00g61780	0	0	0	0	0	1
CA00g61790	32	16	38	42	18	16
CA00g61800	17	31	14	31	13	17
CA00g61810	3	4	3	0	5	4
CA00g62030	4	0	0	0	0	0
CA00g62040	108	148	237	305	93	101
CA00g62050	139	119	183	210	82	109
CA00g62060	357	442	704	718	214	256
CA00g62070	0	0	0	0	0	0
CA00g62080	0	0	3	0	0	0
CA00g62090	1	3	4	9	7	5
CA00g62100	1540	2216	3102	3009	1349	1777
CA00g62110	287	447	687	628	203	222
CA00g62120	456	194	706	907	356	421
CA00g62130	2951	3427	5483	5615	2118	2870
CA00g62140	979	1131	1235	1324	549	716
CA00g62150	0	0	0	0	0	0
CA00g62160	1346	1747	2826	2496	921	1241
CA00g62170	15	0	3	13	1	0
CA00g62180	5	6	25	15	0	0
CA00g62190	88	90	96	161	58	74
CA00g62200	1282	1394	2128	1992	597	761
CA00g62210	0	0	0	0	0	0
CA00g62220	141	186	259	222	67	89
CA00g62230	0	0	0	0	2	2
CA00g62240	0	0	0	0	0	0
CA00g62250	144	160	295	371	123	153
CA00g62260	1232	1731	1700	1718	616	814
CA00g62270	0	0	0	0	0	0
CA00g62280	0	0	0	0	3	2
CA00g62290	1	2	0	0	6	5
CA00g62300	28	26	73	137	61	65
CA00g62310	144	168	233	254	139	181
CA00g62320	963	1306	1409	1386	595	827
CA00g62330	332	351	559	603	220	273
CA00g62790	1	4	2	4	0	0
CA00g62800	1060	1546	1531	1701	785	962
CA00g62810	29	69	111	79	22	28
CA00g62820	47	28	17	58	11	17
CA00g62830	42	61	63	71	31	31
CA00g62840	179	224	300	282	138	181
CA00g62850	12	0	1	13	0	0
CA00g62860	0	0	0	0	0	0
CA00g62870	0	0	0	0	0	0
CA00g62880	13	18	66	71	16	20
CA00g62890	28	32	19	8	14	15
CA00g62900	0	0	0	0	0	0
CA00g62910	1126	1467	1663	2435	829	1059
CA00g62920	0	0	0	0	0	0
CA00g62930	0	0	0	0	0	0
CA00g62940	3	4	5	0	0	0
CA00g62950	36	94	66	98	46	56
CA00g62960	9	28	18	31	3	2
CA00g62970	0	0	0	0	0	0
CA00g62980	356	438	663	612	206	266
CA00g62990	0	0	0	0	0	0
CA00g63000	131	116	265	313	103	136
CA00g63010	11	2	0	0	0	0
CA00g63020	364	444	693	678	330	384
CA00g63300	0	0	0	0	0	0
CA00g63310	0	0	0	0	0	0
CA00g63320	0	0	0	0	0	0
CA00g63330	593	896	755	815	417	506
CA00g63340	0	1	4	9	0	0
CA00g63350	22	13	71	50	19	32
CA00g63360	6008	6254	9890	11353	5412	7185
CA00g63370	30	15	34	70	9	9
CA00g63380	101	149	126	85	23	33
CA00g63390	0	0	1	0	0	0
CA00g63400	8	3	10	8	13	12
CA00g63410	72	88	111	147	52	73
CA00g63420	1336	1466	3223	3332	961	1451
CA00g63430	0	0	0	0	2	2
CA00g63440	0	0	0	0	0	0
CA00g63450	2	0	3	0	0	0
CA00g63460	0	0	0	0	0	0
CA00g63470	34	114	101	97	33	58
CA00g63480	0	0	0	0	0	0
CA00g63490	0	0	0	0	0	0
CA00g63500	1497	2369	2068	1919	997	1302
CA00g63510	13	7	3	21	3	2
CA00g63740	0	0	9	9	0	0
CA00g63750	245	286	469	387	158	255
CA00g63760	0	0	0	0	0	0
CA00g63770	0	1	0	0	1	0
CA00g63780	0	0	0	0	0	0
CA00g63790	0	0	0	0	0	0
CA00g63800	0	0	0	0	0	0
CA00g63810	17	24	29	20	24	31
CA00g63820	335	481	550	520	289	328
CA00g63830	267	405	597	603	261	304
CA00g63840	0	0	0	0	0	0
CA00g63850	0	0	2	0	0	0
CA00g63860	0	0	0	0	0	0
CA00g63870	190	150	332	358	88	105
CA00g63880	1	0	8	0	1	0
CA00g63890	1	0	0	0	0	0
CA00g63900	11	16	39	35	19	27
CA00g63910	0	0	0	0	0	0
CA00g63920	26	26	39	45	11	15
CA00g63930	0	0	2	0	0	0
CA00g63940	0	0	0	0	0	0
CA00g63950	0	0	0	3	0	1
CA00g63960	0	0	0	0	4	7
CA00g63970	1	3	1	5	2	3
CA00g63980	62	66	50	83	36	28
CA00g63990	38	10	46	61	18	15
CA00g64000	2	2	3	11	2	5
CA00g64010	6	1	3	0	0	1
CA00g64020	6	6	26	6	2	5
CA00g64030	281	360	484	441	206	259
CA00g64040	343	474	686	644	229	301
CA00g64050	1	7	4	21	3	8
CA00g64060	0	0	2	0	0	0
CA00g64070	0	0	0	0	0	0
CA00g64080	1173	826	961	1647	901	1003
CA00g64090	0	0	0	0	0	0
CA00g64100	0	0	0	1	0	0
CA00g64110	86	87	125	171	62	85
CA00g64120	3	4	3	10	0	0
CA00g64130	71	72	128	195	65	93
CA00g64140	43	40	122	122	72	67
CA00g64150	11	14	19	26	44	39
CA00g64160	373	639	643	650	464	580
CA00g64170	0	0	0	0	0	0
CA00g64180	213	115	2630	1788	388	505
CA00g64190	4	21	20	22	3	8
CA00g64200	18	10	60	40	5	9
CA00g64210	178	230	303	349	144	160
CA00g64220	67	90	85	84	30	52
CA00g64230	87	107	141	106	70	102
CA00g64240	1023	1024	1391	1619	690	760
CA00g64250	222	256	460	386	200	251
CA00g64260	11	45	17	21	14	27
CA00g64270	321	382	502	364	207	320
CA00g64280	2141	2740	3414	3550	1364	1773
CA00g64290	446	521	642	782	301	365
CA00g64300	157	187	280	362	127	147
CA00g64310	401	483	710	701	287	405
CA00g64320	960	1162	1203	1584	842	1050
CA00g64330	0	0	0	0	0	0
CA00g64340	67	45	83	78	28	29
CA00g64350	102	53	21	22	8	18
CA00g64360	112	97	247	201	93	103
CA00g64370	47	71	71	82	31	33
CA00g64380	0	0	0	0	1	1
CA00g64390	0	0	1	3	0	0
CA00g64400	114	179	223	208	101	98
CA00g64410	12	15	14	17	7	5
CA00g64420	21	22	57	70	25	24
CA00g64430	550	666	801	752	359	417
CA00g64440	0	2	0	0	0	0
CA00g64450	20	13	29	17	7	14
CA00g64460	91	46	154	113	57	64
CA00g64470	256	276	514	544	159	220
CA00g64480	87	109	268	194	45	79
CA00g64490	145	140	298	239	89	117
CA00g64500	103	234	221	200	73	126
CA00g64510	246	234	317	374	145	185
CA00g64520	146	246	229	268	92	136
CA00g64530	676	773	842	796	301	409
CA00g64540	0	0	21	11	0	1
CA00g64550	0	0	0	0	0	0
CA00g64560	0	0	0	0	0	0
CA00g64570	0	0	0	0	0	0
CA00g64580	116	146	127	179	79	69
CA00g64590	11	12	25	29	2	6
CA00g64600	17	22	53	73	38	66
CA00g64610	119	69	227	204	151	185
CA00g64620	4	2	10	8	1	0
CA00g64630	658	826	1155	1006	487	612
CA00g64640	254	200	419	670	233	282
CA00g64650	78	141	231	212	70	79
CA00g64660	601	506	865	999	427	560
CA00g64670	2544	3148	3566	3487	1652	1861
CA00g64680	185	227	337	287	108	167
CA00g64690	1182	946	2031	1972	1520	1848
CA00g64700	170	232	302	252	174	185
CA00g64710	167	179	261	269	144	199
CA00g64720	812	1182	1327	1558	396	512
CA00g64730	127	136	214	150	114	167
CA00g64740	774	1313	1654	1829	819	967
CA00g64750	104	147	145	94	38	50
CA00g64760	581	879	934	986	382	486
CA00g64770	0	0	0	0	0	0
CA00g64780	0	1	1	0	0	0
CA00g64790	0	0	0	0	0	0
CA00g64800	0	9	2	2	0	0
CA00g64810	13	24	56	35	18	25
CA00g64820	0	0	0	0	0	0
CA00g64830	0	0	0	0	0	0
CA00g64840	0	0	1	4	0	0
CA00g65150	200	153	359	293	170	236
CA00g65160	178	229	222	234	145	166
CA00g65170	1905	1975	2585	2707	993	1474
CA00g65180	0	0	0	0	0	0
CA00g65190	393	466	669	717	336	429
CA00g65200	489	610	657	616	243	334
CA00g65210	737	999	1225	1129	490	603
CA00g65220	66	22	37	29	36	49
CA00g65230	1	3	3	0	2	0
CA00g65240	0	0	4	3	0	0
CA00g65250	2	4	0	0	1	5
CA00g65260	122	138	128	152	59	104
CA00g65270	0	0	0	0	0	0
CA00g65280	94	200	182	240	107	118
CA00g65290	1221	1419	1983	2186	793	981
CA00g65300	24	34	21	33	12	35
CA00g65310	505	715	938	967	432	537
CA00g65320	31	11	20	29	1	6
CA00g65330	0	0	0	5	0	0
CA00g65340	0	0	0	0	0	0
CA00g65350	201	177	271	215	73	111
CA00g65610	0	0	0	0	0	0
CA00g65620	0	0	0	0	0	0
CA00g65630	0	0	0	0	0	0
CA00g65640	0	0	0	0	0	0
CA00g65650	0	0	0	0	0	0
CA00g65660	0	0	0	0	0	0
CA00g65670	0	0	0	0	0	0
CA00g65680	0	0	0	0	0	0
CA00g65690	0	0	0	0	0	0
CA00g65700	0	0	0	0	0	0
CA00g65710	0	0	0	0	0	0
CA00g65720	0	0	0	0	0	0
CA00g65730	0	0	0	0	0	0
CA00g65740	0	0	0	0	0	0
CA00g65750	0	0	0	0	0	0
CA00g65980	12	6	22	31	15	13
CA00g65990	0	0	1	0	0	0
CA00g66000	0	0	0	0	0	0
CA00g66010	339	476	557	552	216	305
CA00g66180	99	52	169	161	67	83
CA00g66190	26	35	48	87	23	18
CA00g66200	0	0	0	0	0	0
CA00g66210	0	0	0	1	0	1
CA00g66220	0	1	0	0	0	0
CA00g66230	0	0	0	0	0	0
CA00g66240	0	0	0	0	0	0
CA00g66250	0	0	0	0	0	0
CA00g66260	0	0	0	1	0	0
CA00g66450	0	0	0	0	0	0
CA00g66460	0	0	391	465	188	227
CA00g66470	22	35	40	59	11	15
CA00g66680	0	3	0	0	0	0
CA00g66690	0	6	0	1	1	0
CA00g66700	0	8	1	0	8	4
CA00g66710	13	8	25	16	10	9
CA00g66720	0	0	0	0	1	3
CA00g66730	0	0	0	0	0	0
CA00g66740	0	0	0	0	0	0
CA00g66750	0	0	0	0	0	0
CA00g66760	0	0	0	0	0	0
CA00g66770	0	0	0	0	0	0
CA00g66780	173	216	289	251	99	118
CA00g66790	2	5	9	11	2	4
CA00g66800	0	0	0	0	0	0
CA00g66810	0	0	0	0	0	0
CA00g66820	0	0	0	0	0	0
CA00g66830	0	0	0	0	0	0
CA00g66840	41	28	70	168	2	8
CA00g66850	2064	2012	2172	1972	1075	1412
CA00g66860	0	0	0	0	0	0
CA00g66870	477	616	938	940	380	492
CA00g66880	51	77	112	92	37	56
CA00g66890	1892	2390	3017	2708	1232	1491
CA00g66900	336	412	290	262	92	122
CA00g66910	434	485	644	542	246	314
CA00g66920	55	54	64	71	38	55
CA00g66930	399	303	582	707	236	258
CA00g66940	503	567	757	659	355	421
CA00g66950	55	81	97	111	50	73
CA00g66960	36	64	121	140	49	60
CA00g66970	5493	6281	7333	6938	3110	4236
CA00g66980	3916	4935	7084	7955	2493	3361
CA00g66990	855	763	1063	1021	521	714
CA00g67000	26	69	111	76	29	45
CA00g67010	0	0	0	0	0	0
CA00g67020	1753	2073	2809	2796	1083	1355
CA00g67030	4	24	25	14	2	2
CA00g67040	114	153	194	144	85	87
CA00g67050	194	185	221	250	109	140
CA00g67060	2	0	0	0	0	0
CA00g67070	326	345	305	353	134	159
CA00g67080	213	293	498	420	129	180
CA00g67090	56	56	69	74	12	13
CA00g67100	0	0	0	0	0	0
CA00g67110	0	0	0	0	0	0
CA00g67120	406	677	799	836	326	385
CA00g67130	2	5	5	3	2	1
CA00g67140	4	6	7	2	2	2
CA00g67150	0	0	0	0	0	0
CA00g67160	339	302	370	466	133	184
CA00g67170	2374	3296	3371	3668	1431	1907
CA00g67180	263	254	281	310	133	147
CA00g67190	194	969	490	286	158	211
CA00g67200	0	0	4	0	0	0
CA00g67210	211	275	353	268	126	199
CA00g67400	118	195	342	325	206	237
CA00g67410	0	0	0	0	0	0
CA00g67420	0	1	0	0	1	0
CA00g67430	0	6	0	1	0	0
CA00g67440	2	10	1	1	3	1
CA00g67450	1	0	0	0	0	0
CA00g67460	0	0	0	0	0	0
CA00g67470	89	23	95	74	20	19
CA00g67480	17	1	10	22	4	2
CA00g67490	2	0	0	0	0	0
CA00g67500	130	151	264	292	92	110
CA00g67510	55	39	82	81	21	39
CA00g67520	30728	38686	25820	22954	15555	19659
CA00g67530	318	369	449	409	119	137
CA00g67540	81	105	120	117	28	30
CA00g67550	0	0	0	0	0	0
CA00g67560	1022	1422	1610	1535	555	747
CA00g67570	0	0	0	1	0	1
CA00g67580	0	0	0	0	0	0
CA00g67590	0	0	0	0	0	0
CA00g67600	0	0	0	5	0	1
CA00g67610	0	0	0	0	0	0
CA00g67620	0	0	0	0	0	0
CA00g67630	760	888	984	1004	465	503
CA00g67640	0	2	0	2	0	0
CA00g67650	272	275	502	521	192	255
CA00g67660	0	0	0	0	0	0
CA00g67670	0	0	0	0	0	0
CA00g67680	0	0	1	3	0	0
CA00g67690	0	5	0	1	2	2
CA00g67700	3	0	0	0	0	0
CA00g67710	36	60	89	89	31	39
CA00g67720	823	867	1474	1715	480	605
CA00g67730	16	23	61	44	25	17
CA00g67740	201	335	459	585	165	192
CA00g67750	0	0	0	0	0	2
CA00g67760	53	38	129	106	40	53
CA00g67770	0	0	0	0	0	0
CA00g67780	392	537	632	554	241	366
CA00g67790	490	628	800	788	321	429
CA00g67800	141	155	198	135	88	91
CA00g67810	359	375	597	636	200	225
CA00g67820	685	862	1237	1286	540	668
CA00g67830	0	0	0	0	0	0
CA00g67840	94	99	159	177	48	63
CA00g67850	0	0	0	0	0	0
CA00g67860	0	0	0	0	0	0
CA00g67870	3232	3319	4135	4185	1896	2381
CA00g67880	0	3	6	6	4	2
CA00g67890	0	0	0	0	0	0
CA00g67900	0	0	0	0	0	0
CA00g67910	0	1	0	0	0	0
CA00g67920	0	0	0	0	0	0
CA00g67930	10	5	3	3	0	0
CA00g67940	0	0	0	0	0	0
CA00g67950	0	0	0	0	0	0
CA00g67960	0	0	0	0	0	0
CA00g67970	0	0	2	0	2	1
CA00g67980	0	0	0	0	0	0
CA00g67990	0	0	0	0	0	0
CA00g68000	0	0	0	0	0	0
CA00g68010	0	0	0	0	0	0
CA00g68020	0	2	4	6	0	0
CA00g68030	27	27	74	63	8	8
CA00g68040	1	0	0	0	0	0
CA00g68050	0	2	0	0	0	3
CA00g68060	73	150	165	175	51	64
CA00g68070	0	4	2	0	0	0
CA00g68080	0	0	0	0	0	0
CA00g68090	0	0	0	0	0	0
CA00g68100	0	0	0	0	0	0
CA00g68110	83	99	159	148	70	76
CA00g68120	0	0	0	0	0	0
CA00g68130	27	11	23	40	11	15
[truncated: 32,900 more rows]

## Sheet: N. benthamiana
geneid	MVM1	MVM2	LVM1	LVM2	TM1	TM2	FM1	FM2
NbC23129049g0001.1	0	0	0	0	0	0	0	0
NbC23135165g0001.1	0	0	0	0	0	0	0	0
NbC23135879g0001.1	0	0	0	0	0	0	0	0
NbC23136403g0001.1	0	0	0	0	0	0	0	0
NbC23139529g0001.1	0	0	0	0	0	0	0	0
NbC23143817g0001.1	0	0	0	0	0	0	0	0
NbC23148609g0001.1	0	0	0	0	0	0	0	0
NbC23151083g0001.1	0	0	0	0	0	0	0	0
NbC23151721g0001.1	0	0	1	2	1	0	0	1
NbC23153463g0001.1	0	0	0	0	0	0	0	0
NbC23154779g0001.1	0	0	0	0	0	0	0	0
NbC23156211g0001.1	0	0	0	0	0	0	0	0
NbC23156557g0001.1	0	0	0	0	0	0	0	0
NbC23164039g0001.1	0	0	0	0	0	0	0	0
NbC23171932g0001.1	271	290	311	612	448	630	531	252
NbC23174049g0001.1	0	0	0	0	0	0	0	0
NbC23174827g0001.1	0	0	0	0	0	0	0	0
NbC23180049g0001.1	0	0	0	0	0	0	0	0
NbC23182845g0001.1	0	0	0	0	0	0	0	0
NbC23186771g0001.1	11	19	4	38	30	36	15	12
NbC23187075g0001.1	0	0	0	0	0	0	0	0
NbC23187663g0001.1	4	5	3	9	4	8	2	1
NbC23200356g0001.1	137	154	83	157	343	225	156	71
NbC23200834g0001.1	0	0	0	0	0	0	0	0
NbC23202838g0001.1	0	0	0	0	0	0	0	0
NbC23204368g0001.1	0	0	0	0	0	0	0	0
NbC23204936g0001.1	24	21	2	30	31	13	5	11
NbC23207800g0001.1	0	0	0	0	0	0	0	0
NbC23214512g0001.1	0	0	0	0	0	0	0	0
NbC23214544g0001.1	0	0	0	0	0	0	0	0
NbC23216976g0001.1	0	0	0	0	0	0	0	0
NbC23222793g0001.1	0	0	0	0	0	0	0	0
NbC23224681g0001.1	0	0	0	0	0	1	0	0
NbC23224697g0001.1	0	0	0	0	0	0	0	0
NbC23233801g0001.1	0	0	0	0	0	0	0	0
NbC23233809g0001.1	0	0	0	0	0	0	0	0
NbC23235419g0001.1	3	3	1	6	10	7	8	3
NbC23235833g0001.1	37	34	19	46	66	83	25	33
NbC23237767g0001.1	0	0	0	0	0	0	0	0
NbC23239095g0001.1	4	2	3	5	10	4	2	1
NbC23240422g0001.1	0	0	0	0	0	0	0	0
NbC23241500g0001.1	0	0	0	0	0	0	0	0
NbC23243904g0001.1	35	37	25	82	91	81	48	41
NbC23243906g0001.1	0	0	0	0	0	0	0	0
NbC23243940g0001.1	0	0	0	0	0	0	0	0
NbC23246574g0001.1	0	0	0	0	0	0	0	0
NbC23251274g0001.1	0	0	0	0	0	0	0	0
NbC23251784g0001.1	0	0	0	0	0	0	0	0
NbC23257040g0001.1	0	0	0	0	0	0	0	0
NbC23259490g0001.1	0	0	0	0	0	0	0	0
NbC23260500g0001.1	0	0	0	0	0	0	0	0
NbC23261838g0001.1	29	16	9	26	52	48	16	19
NbC23264274g0001.1	0	1	1	1	7	5	0	1
NbC23265194g0001.1	0	0	0	0	0	0	0	0
NbC23265540g0001.1	0	0	0	0	0	0	0	0
NbC23266469g0001.1	0	0	0	0	0	0	0	0
NbC23268017g0001.1	0	0	0	0	0	0	0	0
NbC23269830g0001.1	0	0	0	0	0	0	0	0
NbC23274774g0001.1	0	0	0	0	0	0	0	0
NbC23280598g0001.1	0	0	0	0	0	0	0	0
NbC23282174g0001.1	3	2	3	6	13	8	8	3
NbC23283790g0001.1	0	0	0	0	0	0	0	0
NbC23283848g0001.1	0	0	0	0	0	0	0	0
NbC23285584g0001.1	0	0	0	0	0	0	0	0
NbC23288952g0001.1	72	65	62	229	260	138	93	55
NbC23288956g0001.1	0	0	0	0	0	0	0	0
NbC23293213g0001.1	0	0	0	0	0	0	0	0
NbC23294013g0001.1	0	0	0	0	0	0	0	0
NbC23294119g0001.1	0	0	0	0	0	0	0	0
NbC23295987g0001.1	0	0	0	0	0	0	0	0
NbC23300057g0001.1	0	0	0	0	0	0	0	0
NbC23300597g0001.1	0	0	0	1	0	0	0	0
NbC23305057g0001.1	0	0	0	0	0	0	0	0
NbC23305221g0001.1	0	0	0	0	0	0	0	0
NbC23305291g0001.1	7	8	1	4	11	9	3	2
NbC23308033g0001.1	57	48	64	157	82	115	145	74
NbC23312891g0001.1	0	0	0	0	0	0	0	0
NbC23313091g0001.1	1994	2044	901	3151	2131	3594	1675	2063
NbC23313247g0001.1	0	0	1	0	1	0	0	0
NbC23315601g0001.1	0	0	0	0	0	0	0	0
NbC23321587g0001.1	3	6	18	5	22	5	16	1
NbC23322059g0001.1	0	0	0	0	0	0	0	0
NbC23325727g0001.1	5	9	1	22	23	15	3	6
NbC23327157g0001.1	0	0	0	0	0	0	0	0
NbC23327443g0001.1	0	0	0	0	0	0	0	0
NbC23328417g0001.1	0	0	0	0	0	0	0	0
NbC23330545g0001.1	8	6	2	12	15	11	6	4
NbC23334522g0001.1	0	0	0	0	0	0	0	0
NbC23334720g0001.1	0	0	0	0	0	0	0	0
NbC23341306g0001.1	87	75	33	151	138	118	32	39
NbC23342240g0001.1	0	0	0	0	0	0	0	0
NbC23346514g0001.1	0	0	0	0	0	0	0	0
NbC23346764g0001.1	0	0	0	0	0	0	0	0
NbC23347044g0001.1	0	0	0	0	0	0	0	0
NbC23351942g0001.1	0	0	0	0	0	0	0	0
NbC23352320g0001.1	117	86	74	242	471	283	175	115
NbC23353710g0001.1	2	5	3	11	16	6	3	1
NbC23356263g0001.1	19	12	7	40	37	18	12	17
NbC23358473g0001.1	0	0	0	0	0	0	0	0
NbC23361447g0002.1	2	4	2	3	7	2	0	4
NbC23362311g0001.1	0	0	0	0	0	0	0	0
NbC23364415g0001.1	0	0	0	0	0	0	0	0
NbC23369687g0001.1	9	10	5	18	28	11	8	7
NbC23373662g0001.1	53	33	32	51	103	77	71	65
NbC23374024g0001.1	0	0	0	0	0	0	0	0
NbC23375122g0001.1	0	0	0	0	0	0	0	0
NbC23380142g0001.1	0	0	0	0	0	0	0	0
NbC23383932g0001.1	0	0	0	0	0	0	0	0
NbC23387224g0001.1	0	0	0	0	0	0	0	0
NbC23387408g0001.1	28	30	13	51	44	36	26	22
NbC23387512g0001.1	139	111	56	294	389	326	125	137
NbC23388304g0001.1	1	1	3	4	15	4	3	2
NbC23392052g0001.1	0	2	5	3	4	4	5	2
NbC23393096g0001.1	0	0	0	0	0	0	0	0
NbC23393118g0001.1	0	0	0	0	0	0	0	0
NbC23400006g0001.1	13	10	9	20	23	11	4	11
NbC23406045g0001.1	0	0	0	0	0	0	0	0
NbC23407105g0001.1	30	37	7	40	29	48	10	30
NbC23407255g0001.1	1	1	0	1	3	3	0	0
NbC23408311g0001.1	0	0	0	0	0	0	0	0
NbC23409183g0001.1	0	0	0	0	0	0	0	0
NbC23411015g0001.1	26	25	35	50	57	58	36	33
NbC23412097g0001.1	16	27	11	31	37	28	27	14
NbC23414213g0001.1	0	0	0	0	0	1	0	0
NbC23415109g0001.1	0	0	0	0	0	0	0	0
NbC23416553g0001.1	0	1	2	1	2	1	0	0
NbC23417273g0001.1	0	0	0	0	0	0	0	0
NbC23418051g0001.1	0	0	0	0	0	0	0	0
NbC23418517g0001.1	0	0	0	0	0	0	0	0
NbC23419769g0001.1	0	0	0	0	0	0	0	0
NbC23420229g0001.1	0	0	0	0	0	0	0	0
NbC23422795g0001.1	0	1	0	1	2	0	1	0
NbC23429524g0001.1	0	0	0	0	0	0	0	0
NbC23431304g0001.1	0	0	0	0	0	0	0	0
NbC23433001g0001.1	22	23	10	23	28	18	17	12
NbC23438069g0001.1	0	0	0	0	0	0	0	0
NbC23440593g0001.1	0	0	0	0	0	0	0	0
NbC23445168g0001.1	0	0	0	0	0	0	0	0
NbC23447716g0001.1	3	4	0	6	6	6	1	1
NbC23452727g0001.1	0	0	0	0	0	0	0	0
NbC23454639g0001.1	54	36	16	28	109	61	42	59
NbC23455111g0001.1	0	0	0	0	0	0	0	0
NbC23458119g0001.1	4	2	0	2	4	6	3	1
NbC23459149g0002.1	61	57	20	91	104	94	39	61
NbC23461751g0001.1	0	0	0	0	0	0	0	0
NbC23463937g0001.1	0	0	0	0	0	0	0	0
NbC23464925g0001.1	0	0	0	0	0	0	0	0
NbC23467339g0001.1	0	0	0	0	0	0	0	0
NbC23469452g0001.1	9	9	13	29	27	22	17	11
NbC23469802g0001.1	4	5	3	10	14	4	2	7
NbC23469890g0001.1	0	0	0	0	0	0	0	0
NbC23471260g0001.1	13	12	5	28	39	27	9	10
NbC23471738g0001.1	1	1	1	7	5	0	0	2
NbC23472458g0002.1	0	0	0	0	0	0	0	0
NbC23473112g0001.1	22	26	5	46	52	64	13	12
NbC23474090g0001.1	0	0	0	0	0	0	0	0
NbC23474810g0001.1	0	0	0	0	0	0	0	0
NbC23477418g0001.1	15	12	7	21	23	15	16	7
NbC23481810g0001.1	2	1	0	1	1	1	0	1
NbC23482046g0002.1	0	0	0	0	0	0	0	0
NbC23484458g0001.1	0	0	0	0	0	0	0	0
NbC23486472g0001.1	0	0	0	0	0	0	0	0
NbC23489043g0001.1	0	0	0	0	0	0	0	0
NbC23489215g0001.1	0	0	0	0	0	0	0	0
NbC23491245g0001.1	0	0	0	0	0	0	0	0
NbC23492897g0001.1	0	0	0	0	0	0	0	0
NbC23493851g0001.1	0	0	0	0	0	0	0	0
NbC23496037g0001.1	0	0	0	0	0	1	0	0
NbC23505093g0001.1	0	0	0	0	0	0	0	0
NbC23505861g0001.1	0	0	0	0	0	0	0	0
NbC23508835g0001.1	0	0	0	0	0	0	0	0
NbC23510395g0001.1	0	0	0	0	0	0	0	0
NbC23510543g0001.1	0	0	0	0	0	0	0	0
NbC23511491g0001.1	0	0	0	0	0	0	0	0
NbC23511915g0001.1	0	0	0	0	0	0	0	0
NbC23512151g0001.1	158	139	25	343	387	348	71	165
NbC23514059g0001.1	0	0	0	0	0	0	0	0
NbC23519462g0001.1	11	4	2	16	13	9	5	14
NbC23521239g0001.1	0	0	0	0	0	0	0	0
NbC23522457g0001.1	20	28	16	39	59	46	29	39
NbC23524041g0001.1	15	12	5	20	22	17	6	4
NbC23525749g0001.1	0	0	0	0	0	0	0	0
NbC23527433g0001.1	0	0	0	0	0	0	0	0
NbC23529093g0001.1	0	0	0	0	2	0	0	0
NbC23530535g0001.1	0	0	0	0	0	0	0	0
NbC23530677g0001.1	0	0	0	0	0	0	0	0
NbC23531351g0001.1	12	10	6	16	96	21	20	12
NbC23532623g0001.1	0	0	0	0	0	0	0	0
NbC23533691g0001.1	63	68	51	178	248	176	87	109
NbC23534481g0001.1	0	0	0	0	0	0	0	0
NbC23534727g0001.1	17	17	10	23	48	28	22	20
NbC23535595g0001.1	7	2	0	8	9	12	2	2
NbC23536830g0001.1	14	17	8	43	63	33	16	17
NbC23538168g0001.1	0	0	0	0	0	0	0	0
NbC23540242g0001.1	0	0	0	0	0	0	0	0
NbC23541614g0001.1	0	0	0	0	0	0	0	0
NbC23542804g0001.1	0	0	0	0	0	0	0	0
NbC23543402g0001.1	0	0	0	0	0	0	0	0
NbC23545506g0001.1	34	30	16	63	33	37	32	28
NbC23545902g0002.1	0	0	0	0	0	0	0	0
NbC23546812g0001.1	0	0	0	0	0	0	0	0
NbC23547360g0001.1	0	0	0	0	0	0	0	0
NbC23550584g0001.1	0	0	0	0	0	0	0	0
NbC23550876g0001.1	0	0	0	0	0	0	0	0
NbC23550878g0001.1	65	65	53	152	102	106	57	45
NbC23552614g0001.1	0	0	0	0	0	0	0	0
NbC23557926g0001.1	9	10	27	28	30	29	26	14
NbC23558792g0001.1	22	11	19	36	31	44	16	6
NbC23559974g0001.1	0	0	0	0	0	0	0	0
NbC23560316g0001.1	0	0	0	0	0	0	0	0
NbC23562928g0001.1	0	0	0	0	0	0	0	0
NbC23567427g0001.1	0	0	3	5	2	2	3	3
NbC23567659g0001.1	0	0	0	0	0	0	0	0
NbC23570160g0001.1	0	0	0	0	0	0	0	0
NbC23574168g0001.1	0	0	0	0	0	0	0	0
NbC23574182g0001.1	5	1	4	11	12	7	10	2
NbC23574698g0001.1	0	0	0	0	0	0	0	0
NbC23574986g0001.1	48	39	46	86	119	103	52	32
NbC23578112g0001.1	0	0	0	0	0	0	0	0
NbC23579900g0002.1	135	223	95	289	37	213	44	20
NbC23581370g0001.1	0	0	0	0	1	0	0	0
NbC23582732g0001.1	0	0	0	0	3	1	0	0
NbC23584522g0001.1	0	0	0	0	0	0	0	0
NbC23586865g0001.1	0	0	0	0	0	0	0	0
NbC23587153g0001.1	0	0	0	0	0	0	0	0
NbC23587611g0001.1	5	4	3	8	8	1	8	4
NbC23588111g0001.1	0	0	0	0	0	0	0	0
NbC23589579g0001.1	0	0	0	0	0	0	0	0
NbC23590977g0001.1	9	8	4	20	13	4	18	4
NbC23592397g0001.1	5	6	1	22	28	9	7	5
NbC23597075g0001.1	0	0	0	0	0	1	0	0
NbC23600465g0001.1	3	7	7	11	15	10	8	4
NbC23601447g0001.1	0	0	0	0	0	0	0	0
NbC23601511g0001.1	0	0	0	0	0	0	0	0
NbC23602799g0001.1	0	0	0	0	0	0	0	0
NbC23608205g0001.1	0	0	0	0	0	0	0	0
NbC23609153g0001.1	0	0	0	0	0	0	0	0
NbC23609911g0002.1	0	0	0	0	0	0	0	0
NbC23611127g0001.1	0	0	0	0	0	0	0	0
NbC23614995g0001.1	0	0	0	0	0	0	0	0
NbC23615037g0001.1	21	5	5	19	53	24	13	17
NbC23616243g0001.1	0	0	0	0	0	0	0	0
NbC23616463g0001.1	3	7	3	9	11	8	5	5
NbC23619549g0002.1	0	0	0	0	0	0	0	0
NbC23626683g0001.1	0	0	0	0	0	0	0	0
NbC23626727g0001.1	0	0	0	0	0	0	0	0
NbC23627629g0001.1	4	4	8	22	11	10	10	7
NbC23631737g0001.1	0	0	0	0	0	0	0	0
NbC23636173g0001.1	1	1	0	4	1	4	4	1
NbC23638007g0001.1	1	0	0	1	0	0	0	0
NbC23638277g0001.1	18	11	25	43	32	34	24	16
NbC23641021g0001.1	0	0	0	0	0	0	0	0
NbC23641713g0001.1	14	14	11	40	27	25	14	18
NbC23642249g0001.1	0	0	0	0	0	0	0	0
NbC23647566g0001.1	15	12	5	22	33	16	9	5
NbC23648761g0001.1	0	0	0	0	0	0	0	0
NbC23649023g0001.1	0	0	0	0	0	0	0	0
NbC23649577g0001.1	10	4	1	7	6	5	3	5
NbC23649819g0001.1	0	0	0	0	0	0	0	0
NbC23651759g0001.1	0	0	0	0	0	0	0	0
NbC23653829g0001.1	0	0	0	0	1	0	0	0
NbC23654049g0001.1	5	3	2	10	7	7	3	2
NbC23654771g0001.1	0	0	0	0	0	0	0	0
NbC23654983g0001.1	0	0	0	0	0	0	0	0
NbC23656513g0001.1	0	0	0	0	0	0	0	0
NbC23659329g0001.1	0	0	0	0	0	0	0	0
NbC23659389g0001.1	6	12	2	23	12	8	1	8
NbC23660990g0001.1	1	2	1	3	5	4	0	1
NbC23661000g0001.1	0	0	0	0	0	0	0	0
NbC23661338g0001.1	0	0	0	0	0	1	0	0
NbC23662598g0001.1	39	34	67	78	57	66	88	35
NbC23662714g0001.1	6	4	5	17	21	13	12	5
NbC23663066g0001.1	16	14	6	21	33	31	19	18
NbC23664894g0001.1	14	15	2	18	26	17	14	9
NbC23666742g0001.1	0	0	0	0	0	0	0	0
NbC23671296g0002.1	10	6	1	8	14	4	3	4
NbC23674094g0001.1	47	74	42	104	140	158	71	72
NbC23674686g0001.1	0	0	0	0	0	0	0	0
NbC23674820g0001.1	0	0	0	0	0	0	0	0
NbC23675126g0001.1	0	0	0	0	0	0	0	0
NbC23679489g0001.1	1	0	0	2	1	1	4	0
NbC23679731g0001.1	0	0	0	0	0	0	0	0
NbC23681997g0001.1	0	0	0	0	0	0	0	0
NbC23683697g0001.1	32	33	21	66	27	46	40	26
NbC23683785g0001.1	0	0	0	0	0	0	0	0
NbC23683855g0001.1	0	0	0	0	0	0	0	0
NbC23683935g0002.1	20	10	11	15	49	22	15	12
NbC23684155g0001.1	13	8	5	23	46	23	14	6
NbC23689612g0001.1	0	0	0	0	0	0	0	0
NbC23691240g0001.1	1	0	0	0	0	0	0	0
NbC23694632g0001.1	0	0	3	6	3	2	3	3
NbC23697068g0001.1	7	7	5	14	40	17	14	21
NbC23698138g0001.1	0	0	0	0	0	0	0	0
NbC23699290g0001.1	0	0	0	0	0	0	0	0
NbC23700237g0001.1	0	0	0	0	0	0	0	0
NbC23701425g0001.1	0	0	0	0	0	0	0	0
NbC23704004g0001.1	0	0	0	0	0	0	0	0
NbC23705708g0001.1	0	0	0	0	0	0	0	0
NbC23709070g0001.1	308	255	103	628	599	666	286	286
NbC23709198g0001.1	0	0	0	0	0	0	0	0
NbC23710160g0001.1	0	0	0	0	0	0	0	0
NbC23714042g0001.1	0	0	0	0	0	0	0	0
NbC23714312g0001.1	33	23	34	50	34	39	83	20
NbC23714878g0001.1	0	0	0	0	0	0	0	0
NbC23718152g0001.1	0	0	0	0	0	0	0	0
NbC23720052g0001.1	0	0	0	0	0	0	0	0
NbC23721530g0001.1	0	0	0	0	0	0	0	0
NbC23724496g0001.1	0	0	0	0	0	0	0	0
NbC23725186g0001.1	4	5	0	4	7	4	0	2
NbC23726790g0001.1	0	0	0	0	0	0	0	0
NbC23727185g0001.1	0	0	0	0	0	0	0	0
NbC23727221g0001.1	0	0	0	0	0	0	0	0
NbC23728603g0001.1	0	0	0	0	0	0	0	0
NbC23729813g0001.1	0	0	0	0	0	0	0	0
NbC23730213g0001.1	203	173	116	361	268	368	226	202
NbC23731719g0001.1	0	0	0	0	0	0	0	0
NbC23732021g0002.1	0	0	0	0	0	0	0	0
NbC23737139g0001.1	97	68	53	193	305	199	94	103
NbC23737687g0001.1	17	18	39	64	12	37	77	8
NbC23737757g0001.1	0	0	0	0	0	0	0	0
NbC23738215g0001.1	0	0	0	0	0	0	0	0
NbC23739273g0001.1	0	0	0	0	0	0	0	0
NbC23743081g0001.1	0	0	0	0	0	0	0	0
NbC23744093g0001.1	0	0	0	0	0	0	0	0
NbC23744801g0001.1	0	0	0	0	0	0	0	0
NbC23747271g0001.1	0	0	0	0	0	0	0	0
NbC23747605g0001.1	617	542	106	1053	1040	1060	294	639
NbC23748503g0001.1	0	0	0	0	0	0	0	0
NbC23749203g0001.1	0	0	0	0	0	0	0	0
NbC23749211g0001.1	0	0	0	0	0	0	0	0
NbC23749293g0001.1	0	0	0	0	0	0	0	0
NbC23749343g0001.1	0	0	0	0	0	0	0	0
NbC23749903g0001.1	0	0	0	0	0	0	0	0
NbC23750043g0001.1	0	0	0	0	0	0	0	0
NbC23752341g0002.1	20	6	2	27	46	21	9	21
NbC23755045g0001.1	0	0	0	0	0	0	0	0
NbC23755371g0001.1	6	1	1	8	12	3	8	4
NbC23755733g0001.1	0	0	0	0	0	0	0	0
NbC23755853g0001.1	0	0	0	0	0	0	0	0
NbC23756437g0001.1	0	0	0	0	0	0	0	0
NbC23758669g0001.1	0	0	0	1	0	0	1	0
NbC23760399g0001.1	51	37	22	79	78	85	25	20
NbC23761219g0001.1	0	0	0	0	0	0	0	0
NbC23761605g0001.1	8	7	3	12	25	19	12	3
NbC23762525g0001.1	0	0	0	0	0	0	0	0
NbC23763655g0001.1	0	0	0	0	0	0	0	0
NbC23763781g0001.1	0	0	0	0	0	0	0	0
NbC23764053g0001.1	1267	1159	499	1798	2221	2009	1010	1419
NbC23764273g0001.1	14	9	7	19	16	20	11	7
NbC23764863g0001.1	16	15	11	42	38	31	23	18
NbC23765889g0001.1	0	0	0	0	0	0	0	0
NbC23766265g0001.1	14	7	6	16	10	11	3	8
NbC23766469g0001.1	0	0	0	0	0	0	0	0
NbC23767124g0001.1	4	1	4	2	5	2	2	1
NbC23767514g0001.1	0	0	0	0	0	0	0	0
NbC23767886g0001.1	1	0	3	1	0	3	1	3
NbC23769986g0001.1	0	0	0	0	0	0	0	0
NbC23770994g0002.1	10	11	9	25	29	19	12	15
NbC23774738g0001.1	4	6	0	13	8	3	6	1
NbC23776494g0001.1	0	0	0	0	0	0	0	0
NbC23778225g0001.1	0	0	0	0	0	0	0	0
NbC23778713g0001.1	24	22	20	68	33	41	22	18
NbC23780968g0001.1	0	0	0	0	0	0	0	0
NbC23784641g0001.1	67	59	31	121	81	73	33	23
NbC23785213g0002.1	0	0	0	0	0	0	0	0
NbC23785289g0001.1	0	0	0	0	0	0	0	0
NbC23785971g0001.1	0	0	0	0	0	0	0	0
NbC23786187g0001.1	29	35	6	42	44	37	13	36
NbC23788121g0001.1	0	3	2	2	10	7	3	0
NbC23790037g0002.1	0	0	0	0	0	0	0	0
NbC23791073g0001.1	0	0	0	0	0	2	0	0
NbC23793351g0001.1	0	0	0	0	0	0	0	0
NbC23793413g0001.1	0	0	0	0	0	0	0	0
NbC23793509g0001.1	0	0	0	0	0	0	0	0
NbC23793619g0001.1	0	0	0	0	0	0	0	0
NbC23794743g0001.1	0	0	0	0	0	0	0	0
NbC23794875g0001.1	0	0	0	0	0	0	0	0
NbC23794879g0001.1	5	4	5	19	18	10	6	10
NbC23795695g0001.1	0	1	0	0	1	0	4	0
NbC23797745g0001.1	1	5	3	3	13	5	2	3
NbC23797905g0001.1	0	0	0	0	0	0	0	0
NbC23799319g0001.1	18	13	27	61	33	42	29	21
NbC23802725g0001.1	0	0	0	0	0	0	0	0
NbC23803083g0001.1	49	26	22	79	101	71	54	41
NbC23803361g0002.1	0	0	0	0	0	0	0	0
NbC23809551g0001.1	0	0	0	2	1	1	2	0
NbC23809683g0001.1	0	0	0	0	0	0	0	0
NbC23812137g0001.1	17	13	14	37	31	35	7	5
NbC23813943g0001.1	14	19	25	42	54	29	28	15
NbC23814183g0001.1	0	0	0	0	0	0	0	0
NbC23814295g0001.1	0	0	0	0	0	0	0	0
NbC23814427g0001.1	0	0	0	0	0	0	0	0
NbC23821162g0001.1	0	0	0	0	0	0	0	0
NbC23821798g0001.1	139	162	81	262	197	220	73	59
NbC23823928g0001.1	0	0	0	0	0	0	0	0
NbC23824403g0002.1	0	0	0	0	0	0	0	0
NbC23824649g0001.1	0	1	2	2	5	7	1	1
NbC23828907g0001.1	0	0	0	0	0	0	0	0
NbC23829173g0001.1	0	0	0	0	0	0	0	0
NbC23830153g0002.1	0	2	1	1	2	1	0	0
NbC23830543g0001.1	0	0	0	0	0	0	0	0
NbC23832679g0001.1	18	20	11	30	28	16	8	11
NbC23833409g0001.1	0	0	0	0	0	0	0	0
NbC23835500g0001.1	0	0	0	0	0	0	0	0
NbC23837422g0001.1	0	0	0	0	0	0	0	0
NbC23837758g0001.1	16	9	4	26	28	17	3	9
NbC23838148g0001.1	0	0	0	0	0	0	0	0
NbC23839216g0001.1	3	9	3	6	14	8	1	6
NbC23841612g0001.1	0	0	0	0	0	0	0	0
NbC23842620g0001.1	18	19	10	18	13	20	8	11
NbC23843582g0002.1	90	92	37	143	110	165	67	100
NbC23843986g0001.1	0	0	0	0	0	0	0	0
NbC23847028g0001.1	25	21	19	46	41	36	31	26
NbC23849516g0001.1	11	14	7	12	18	9	7	7
NbC23849928g0001.1	50	54	20	76	56	69	20	46
NbC23850340g0001.1	21	18	12	40	20	25	16	9
NbC23850450g0002.1	45	40	39	123	107	75	88	46
NbC23850577g0001.1	0	0	0	0	0	0	0	0
NbC23850965g0001.1	0	0	0	0	0	0	0	0
NbC23854757g0001.1	11	5	8	14	20	14	13	11
NbC23855827g0002.1	9	9	11	18	13	6	14	7
NbC23855917g0001.1	0	0	0	0	0	0	0	0
NbC23856411g0001.1	0	0	0	0	0	0	0	0
NbC23856951g0001.1	0	0	0	0	0	0	0	0
NbC23859219g0001.1	0	0	0	0	0	0	0	0
NbC23860750g0001.1	0	0	0	0	0	0	0	0
NbC23864313g0001.1	55	58	16	102	106	92	36	72
NbC23865055g0001.1	0	0	0	0	0	0	0	0
NbC23868163g0001.1	0	0	0	0	0	0	0	0
NbC23868309g0001.1	0	0	0	0	0	0	0	0
NbC23868495g0001.1	0	0	0	0	0	0	0	0
NbC23870409g0001.1	59	42	36	119	162	110	63	50
NbC23871675g0001.1	7	1	7	11	11	9	6	6
NbC23871945g0001.1	7	7	2	3	7	3	3	6
NbC23876461g0001.1	0	0	0	0	0	0	0	0
NbC23877651g0001.1	0	0	0	0	0	0	0	0
NbC23877853g0001.1	0	0	0	0	0	0	2	0
NbC23879079g0001.1	17	21	11	42	27	20	13	10
NbC23882543g0001.1	0	3	0	3	4	2	4	0
NbC23882545g0001.1	0	0	0	0	0	0	0	0
NbC23883165g0001.1	7	9	9	17	16	19	13	9
NbC23884425g0001.1	0	0	0	0	0	0	0	0
NbC23886207g0001.1	0	0	0	0	0	0	0	0
NbC23886557g0001.1	0	0	0	0	0	0	0	0
NbC23889011g0002.1	2	0	0	0	2	0	0	0
NbC23890850g0001.1	8	4	6	20	14	8	15	4
NbC23891506g0001.1	0	0	0	0	0	0	0	1
NbC23894786g0001.1	1	4	2	4	4	1	3	1
NbC23895968g0001.1	0	0	0	0	0	0	0	0
NbC23897726g0001.1	0	3	1	0	1	2	0	0
NbC23899306g0001.1	0	0	0	0	0	0	0	0
NbC23900014g0001.1	10	16	8	35	78	57	31	25
NbC23900056g0001.1	0	0	0	0	0	0	0	0
NbC23901172g0001.1	0	0	0	0	0	0	0	0
NbC23903334g0001.1	0	0	0	0	0	0	0	0
NbC23903998g0001.1	170	138	105	179	189	200	156	107
NbC23905900g0001.1	58	51	55	131	119	101	93	32
NbC23906848g0001.1	0	0	0	0	0	0	0	0
NbC23907220g0001.1	18	20	20	45	62	37	22	18
NbC23908242g0001.1	18	27	30	56	59	40	50	17
NbC23908292g0001.1	5	6	1	22	14	8	6	6
NbC23909974g0001.1	0	0	0	0	0	0	0	0
NbC23910120g0001.1	0	0	0	0	0	0	0	0
NbC23911994g0001.1	0	0	0	0	0	0	0	0
NbC23912298g0001.1	0	0	0	0	0	0	0	0
NbC23915109g0001.1	0	0	0	0	0	0	0	0
NbC23915509g0001.1	0	0	0	0	0	0	0	0
NbC23917119g0001.1	0	0	0	0	0	0	0	0
NbC23917607g0001.1	0	0	0	0	0	0	0	0
NbC23920609g0001.1	0	0	0	0	0	0	0	0
NbC23921619g0001.1	22	19	23	44	33	59	29	26
NbC23921923g0001.1	50	53	45	118	108	106	58	55
NbC23922323g0001.1	4	5	1	13	7	5	8	4
NbC23923731g0001.1	0	0	0	0	0	0	0	0
NbC23927159g0001.1	0	0	0	0	0	0	0	0
NbC23927999g0001.1	4	1	0	7	4	7	10	5
NbC23929283g0001.1	0	0	0	0	0	0	0	0
NbC23929411g0001.1	0	1	1	5	1	1	0	2
NbC23929911g0001.1	0	0	0	0	0	0	0	0
NbC23930535g0001.1	0	0	0	0	2	0	0	0
NbC23933293g0001.1	0	0	0	0	0	0	0	0
NbC23933797g0001.1	0	0	0	0	0	0	0	0
NbC23934931g0001.1	0	0	0	0	0	0	0	0
NbC23936917g0001.1	0	0	0	0	0	0	0	0
NbC23939653g0001.1	0	0	0	0	0	0	0	0
NbC23939997g0001.1	0	0	0	0	0	0	0	0
NbC23940629g0001.1	0	0	0	0	0	0	0	0
NbC23940831g0001.1	16	16	21	43	40	19	24	11
NbC23941503g0001.1	0	0	0	0	0	0	0	0
NbC23943380g0001.1	0	0	0	0	0	0	0	0
NbC23945826g0002.1	6	7	2	15	16	13	3	3
NbC23946648g0001.1	14	10	19	34	30	23	22	13
NbC23947432g0001.1	0	0	0	0	0	0	0	0
NbC23949166g0001.1	0	0	0	0	0	0	0	0
NbC23951406g0001.1	56	69	32	84	56	67	39	16
NbC23951420g0001.1	0	0	0	0	0	0	0	0
NbC23954930g0001.1	0	0	0	0	0	0	0	0
NbC23955046g0001.1	0	0	0	0	0	0	0	0
NbC23960614g0001.1	20	18	9	28	31	25	14	12
NbC23963283g0001.1	0	0	0	0	0	0	0	0
NbC23963647g0001.1	0	0	0	0	0	0	0	0
NbC23965981g0001.1	0	0	0	0	0	0	0	0
NbC23966915g0001.1	0	0	0	0	0	0	0	0
NbC23967305g0001.1	0	0	0	0	0	0	0	0
NbC23968129g0001.1	0	0	0	0	0	0	0	0
NbC23968947g0001.1	0	0	0	0	0	0	0	0
NbC23969391g0001.1	0	0	0	0	0	0	0	0
NbC23972253g0001.1	0	0	0	0	0	0	0	0
NbC23972445g0001.1	0	0	0	0	1	1	0	0
NbC23973679g0001.1	52	34	26	53	124	49	31	37
NbC23974699g0001.1	10	8	10	19	12	12	7	7
NbC23974981g0001.1	42	36	58	86	87	57	41	21
NbC23975337g0001.1	3	6	3	13	15	14	10	3
NbC23975443g0001.1	0	1	1	2	0	1	0	0
NbC23977387g0001.1	0	0	0	0	0	0	0	0
NbC23978515g0001.1	0	0	0	0	0	0	0	0
NbC23979353g0001.1	57	44	29	107	71	68	43	34
NbC23979561g0001.1	0	0	0	0	0	0	1	0
NbC23979665g0001.1	0	0	0	0	0	0	0	0
NbC23982093g0001.1	2	0	0	3	4	2	0	1
NbC23982713g0001.1	0	0	0	0	0	0	0	0
NbC23984723g0001.1	0	0	0	0	0	0	0	0
NbC23985755g0001.1	4	2	1	5	7	4	3	1
NbC23986161g0001.1	0	0	0	0	0	0	0	0
NbC23986411g0001.1	0	0	0	0	0	0	0	0
NbC23986537g0001.1	31	35	19	44	53	57	24	25
NbC23987923g0001.1	25	29	24	41	31	32	15	13
NbC23988691g0001.1	249	259	110	541	390	462	193	220
NbC23989517g0002.1	0	0	0	0	0	0	0	0
NbC23990197g0001.1	42	32	47	63	52	66	58	32
NbC23990513g0001.1	0	0	0	0	0	0	0	0
NbC23990909g0001.1	31	20	8	36	27	23	5	8
NbC23991205g0001.1	24	23	15	50	55	37	26	23
NbC23991925g0001.1	0	0	0	0	0	0	0	0
NbC23992343g0001.1	395	375	165	728	870	653	388	459
NbC23994419g0001.1	0	0	0	0	0	0	0	0
NbC23996399g0001.1	4	3	3	4	6	2	4	1
NbC23998229g0001.1	0	0	0	0	0	0	0	0
NbC24000975g0001.1	0	0	0	0	1	0	0	0
NbC24001453g0001.1	0	0	0	0	0	0	0	0
NbC24003935g0001.1	0	0	0	0	0	0	0	0
NbC24004441g0002.1	2	1	0	4	2	2	0	1
NbC24006085g0001.1	0	0	0	0	0	0	0	0
NbC24007533g0001.1	14	3	4	24	8	7	15	12
NbC24010665g0001.1	0	0	0	0	0	0	0	0
NbC24013865g0001.1	16	10	5	19	21	20	6	20
NbC24014415g0001.1	13	3	6	22	30	25	8	8
NbC24014927g0001.1	0	0	0	0	0	0	0	0
NbC24015739g0001.1	14	12	13	25	34	19	16	13
NbC24016945g0001.1	0	0	0	0	0	0	0	0
NbC24016995g0001.1	0	0	0	0	0	0	0	0
NbC24017063g0002.1	0	0	0	0	0	0	0	0
NbC24020227g0001.1	0	0	0	0	0	0	0	0
NbC24020691g0001.1	46	28	9	48	52	67	26	49
NbC24021449g0001.1	38	43	13	58	85	72	30	43
NbC24022059g0001.1	1	3	1	6	4	7	0	3
NbC24022377g0001.1	0	0	0	0	0	0	0	0
NbC24023801g0001.1	0	0	0	0	0	0	0	0
NbC24026083g0001.1	0	0	0	1	0	1	0	0
NbC24030342g0001.1	12	32	5	43	36	30	18	16
NbC24030932g0001.1	0	0	0	0	0	0	0	0
NbC24031148g0001.1	0	0	0	0	0	0	0	0
NbC24031742g0001.1	0	0	1	0	0	0	0	0
NbC24034406g0001.1	0	0	0	0	0	0	0	0
NbC24037598g0001.1	0	0	0	0	0	0	0	0
NbC24038656g0001.1	0	0	0	0	0	0	0	0
NbC24041694g0001.1	0	1	0	0	1	0	0	0
NbC24042712g0001.1	21	17	10	45	39	31	22	14
NbC24042736g0001.1	0	0	0	0	0	0	0	0
NbC24043038g0001.1	81	64	56	170	204	152	133	73
NbC24044300g0001.1	3	5	4	7	12	6	8	3
NbC24045602g0001.1	0	0	0	0	0	0	0	0
NbC24046866g0001.1	0	0	0	0	0	0	0	0
NbC24049480g0001.1	12	8	6	19	20	24	7	3
NbC24051134g0001.1	0	0	0	0	0	0	1	0
NbC24052114g0001.1	0	0	0	0	0	0	0	0
NbC24055048g0001.1	0	0	0	0	0	0	0	0
NbC24056338g0001.1	4	6	1	11	12	8	2	2
NbC24056408g0001.1	0	0	0	0	0	0	0	0
NbC24056934g0001.1	55	56	28	101	121	122	46	58
NbC24057186g0001.1	76	74	154	178	165	131	208	58
NbC24057400g0002.1	15	16	16	49	33	34	23	17
NbC24059153g0001.1	48	44	31	87	66	48	38	18
NbC24059207g0001.1	0	0	0	0	0	0	0	0
NbC24060511g0001.1	0	0	0	0	0	0	0	0
NbC24066252g0001.1	0	1	0	3	1	1	1	0
NbC24069745g0001.1	0	0	0	0	2	0	0	1
NbC24070081g0001.1	3	3	3	7	7	8	8	0
NbC24070121g0001.1	0	0	0	0	0	0	0	0
NbC24070589g0002.1	2	8	2	13	11	4	4	1
NbC24070867g0001.1	0	0	0	0	0	0	0	0
NbC24073411g0001.1	0	0	0	0	0	0	0	0
NbC24074475g0004.1	16	12	14	26	48	23	19	10
NbC24075231g0001.1	0	0	0	0	0	0	0	0
NbC24075527g0001.1	0	0	0	0	0	0	0	0
NbC24077855g0001.1	0	1	0	0	0	1	0	0
NbC24077899g0001.1	0	0	0	0	0	0	0	0
NbC24079289g0001.1	0	0	0	0	0	0	0	0
NbC24079681g0002.1	0	0	0	0	0	0	0	0
NbC24079723g0001.1	3	6	6	7	16	8	7	2
NbC24079993g0001.1	0	0	0	0	0	0	0	0
NbC24080257g0001.1	661	633	610	1256	979	1190	845	557
NbC24081199g0001.1	0	0	0	0	0	0	0	0
NbC24081849g0001.1	0	1	0	0	0	0	0	0
NbC24084343g0001.1	4	1	1	3	4	1	0	1
NbC24084661g0001.1	0	0	0	0	0	0	0	0
NbC24086542g0001.1	0	0	0	0	0	0	0	0
NbC24087050g0001.1	2	2	3	14	16	8	3	4
NbC24087466g0001.1	0	0	2	0	1	2	0	0
NbC24088562g0001.1	0	0	0	0	0	0	0	0
NbC24088802g0001.1	29	34	18	58	73	56	34	32
NbC24089638g0001.1	0	0	0	0	0	0	0	0
NbC24091158g0001.1	0	0	0	0	0	0	0	0
NbC24092916g0001.1	0	0	0	0	0	0	0	0
NbC24092994g0001.1	13	9	5	17	21	8	4	11
NbC24093690g0001.1	0	0	0	0	0	0	0	0
NbC24094354g0001.1	44	36	22	79	64	69	32	31
NbC24094968g0001.1	0	0	0	0	0	0	0	0
NbC24097126g0001.1	0	0	0	0	0	0	0	0
NbC24097730g0001.1	0	0	0	0	0	0	0	0
NbC24100028g0001.1	0	0	0	0	0	0	0	0
NbC24101312g0001.1	0	0	0	0	0	0	0	0
NbC24103440g0001.1	12	9	26	38	14	20	11	5
NbC24109430g0001.1	0	0	0	0	0	0	0	0
NbC24111062g0001.1	0	0	0	0	0	0	0	0
NbC24112202g0001.1	0	0	0	0	0	0	0	0
NbC24113164g0002.1	54	28	23	97	93	75	41	46
NbC24113610g0001.1	0	2	0	4	0	0	2	0
NbC24115362g0001.1	0	0	0	0	0	0	0	0
NbC24115748g0001.1	0	0	0	0	0	0	0	0
NbC24116892g0001.1	0	0	0	0	0	0	0	0
NbC24116914g0001.1	0	0	0	0	0	0	0	0
NbC24120808g0001.1	0	0	0	0	0	0	0	0
NbC24121238g0001.1	2	0	2	6	8	0	1	1
NbC24125786g0002.1	0	0	0	0	0	0	0	0
NbC24126686g0001.1	0	0	0	0	0	0	0	0
NbC24126888g0001.1	2	1	0	3	0	2	1	1
NbC24127126g0001.1	1	1	1	3	5	0	7	1
NbC24128202g0001.1	0	0	0	0	0	0	0	0
NbC24133056g0002.1	0	0	2	3	5	1	1	0
NbC24135134g0001.1	0	0	0	0	0	0	0	0
NbC24137056g0001.1	0	0	0	0	0	0	0	0
NbC24137744g0001.1	0	0	0	0	0	0	0	0
NbC24138440g0002.1	1	2	0	3	1	1	1	1
NbC24139746g0001.1	19	6	12	31	43	25	20	8
NbC24140330g0001.1	0	0	0	0	0	0	0	0
NbC24141102g0002.1	0	0	0	0	0	0	0	0
NbC24144256g0001.1	0	0	0	0	0	0	0	0
NbC24148431g0001.1	114	105	45	208	168	189	85	92
NbC24150629g0001.1	0	0	0	0	0	0	0	0
NbC24151891g0001.1	0	0	0	0	0	0	0	0
NbC24152731g0002.1	23	19	25	55	35	31	33	14
NbC24153167g0001.1	0	0	0	1	0	0	0	0
NbC24154579g0002.1	435	312	161	735	1037	832	292	384
NbC24155925g0001.1	51	37	30	94	77	103	48	30
NbC24156043g0001.1	0	0	0	0	0	0	0	0
NbC24157281g0001.1	0	0	0	0	0	0	0	0
NbC24157441g0001.1	5	5	4	21	11	20	8	7
NbC24159831g0001.1	36	19	21	35	26	51	33	39
NbC24160679g0001.1	22	23	19	49	30	32	25	7
NbC24160803g0001.1	10	8	12	11	17	12	18	8
NbC24161617g0001.1	66	42	41	115	123	100	62	51
NbC24162159g0001.1	0	0	0	0	0	0	0	0
NbC24164090g0001.1	1	6	3	13	21	13	3	5
NbC24168486g0001.1	0	0	0	0	0	0	0	0
NbC24172700g0001.1	21	20	17	59	59	33	32	20
NbC24172720g0001.1	6	4	2	14	5	16	10	4
NbC24176595g0001.1	0	0	0	0	0	0	0	0
NbC24176617g0001.1	24	18	22	52	45	23	26	12
NbC24177883g0001.1	15	4	4	15	17	14	14	8
NbC24181946g0001.1	0	0	0	0	0	0	0	0
NbC24182374g0001.1	4	4	1	4	0	6	2	0
NbC24183296g0001.1	27	25	9	72	48	66	35	41
NbC24186920g0001.1	0	0	0	0	0	0	0	0
NbC24187568g0001.1	0	0	0	0	0	0	0	0
NbC24188040g0001.1	0	0	0	0	0	0	0	0
NbC24188352g0001.1	70	82	73	167	154	120	97	60
NbC24188770g0002.1	40	30	25	86	67	52	40	32
NbC24189148g0001.1	0	0	0	0	0	0	0	0
NbC24190676g0001.1	0	0	0	0	0	0	0	0
NbC24191018g0001.1	1	3	0	5	0	1	0	0
NbC24193481g0001.1	0	0	0	0	0	0	0	0
NbC24193759g0001.1	0	0	0	0	0	0	0	0
NbC24195834g0001.1	9	13	14	51	43	21	22	11
NbC24197058g0001.1	0	0	0	0	0	0	0	0
NbC24197572g0001.1	0	0	0	0	0	0	0	0
NbC24200293g0001.1	0	0	0	0	0	0	0	0
NbC24201415g0001.1	11	15	9	23	16	24	17	14
NbC24203037g0001.1	0	0	0	0	0	0	0	0
NbC24203375g0001.1	0	0	0	0	0	0	0	0
NbC24203551g0001.1	0	0	0	0	0	0	0	0
NbC24204573g0001.1	0	0	0	0	0	0	0	0
NbC24204719g0001.1	11	7	2	28	20	16	8	5
NbC24204905g0001.1	0	0	0	0	0	0	0	0
NbC24205143g0001.1	0	0	0	0	0	0	0	0
NbC24206119g0001.1	0	0	0	0	0	0	0	0
NbC24206643g0001.1	0	0	0	0	0	0	0	0
NbC24207283g0001.1	15	11	18	40	14	17	23	10
NbC24207793g0001.1	12	14	14	38	21	17	27	14
NbC24209059g0001.1	0	0	0	0	0	0	0	0
NbC24210475g0001.1	0	0	0	0	0	0	0	0
NbC24211353g0001.1	0	0	0	0	0	0	0	0
NbC24214167g0001.1	8	8	6	22	12	13	11	7
NbC24215777g0001.1	0	0	0	0	0	0	0	0
NbC24216073g0001.1	1	1	0	0	5	3	1	1
NbC24217363g0001.1	0	0	0	0	0	0	0	0
NbC24218967g0002.1	20	15	12	28	44	26	16	14
NbC24219583g0001.1	1929	1689	911	4292	4051	3002	1898	2136
NbC24220695g0001.1	0	0	0	0	0	0	0	0
NbC24222145g0002.1	5	4	1	11	8	5	5	5
NbC24222155g0001.1	0	0	1	3	1	5	0	1
NbC24222673g0002.1	0	0	0	0	0	0	1	0
NbC24222681g0001.1	1	3	4	21	9	12	9	2
NbC24223207g0001.1	2	1	2	6	2	5	6	4
NbC24223235g0001.1	0	0	0	0	0	0	0	0
NbC24224736g0001.1	0	0	0	0	0	0	0	0
NbC24224834g0001.1	0	0	0	0	0	0	0	0
NbC24225228g0001.1	0	1	1	5	0	2	3	0
NbC24225248g0001.1	0	0	0	0	0	0	0	0
NbC24229551g0001.1	2	7	6	4	9	7	7	6
NbC24229801g0001.1	0	0	0	0	0	0	0	0
NbC24233615g0001.1	0	0	0	0	0	0	0	0
NbC24235527g0001.1	7	5	8	17	19	18	14	10
NbC24237671g0001.1	0	1	1	6	3	1	1	2
NbC24238393g0001.1	0	0	0	0	0	0	0	0
NbC24238531g0001.1	0	0	0	0	1	0	0	0
NbC24239783g0001.1	0	0	0	0	0	0	0	0
NbC24242461g0003.1	0	0	0	0	0	0	0	0
NbC24242643g0001.1	0	0	0	0	0	0	0	0
NbC24245046g0001.1	0	0	0	0	0	0	0	0
NbC24245394g0002.1	30	36	18	79	99	86	43	49
NbC24246624g0001.1	0	0	0	0	0	0	0	0
NbC24247068g0001.1	0	0	0	0	0	0	0	0
NbC24254036g0001.1	33	31	45	97	63	64	93	32
NbC24256027g0001.1	0	0	0	0	0	0	0	0
NbC24257043g0001.1	23	16	24	55	87	56	35	32
NbC24257655g0001.1	0	0	0	0	0	0	0	0
NbC24258581g0003.1	0	0	0	0	0	0	0	0
NbC24259035g0001.1	4	5	3	9	9	4	4	2
NbC24260725g0001.1	103	103	121	224	368	253	205	123
NbC24261845g0001.1	14	25	17	47	35	33	25	6
NbC24263043g0001.1	12	12	7	29	32	33	26	15
NbC24268156g0001.1	0	0	0	0	0	0	0	0
NbC24270504g0002.1	0	0	0	0	0	0	0	0
NbC24271880g0001.1	14	8	13	22	30	24	11	10
NbC24271932g0001.1	30	19	17	56	52	50	31	22
NbC24272150g0001.1	0	0	0	0	0	0	0	0
NbC24273094g0001.1	0	0	0	0	0	0	0	0
NbC24273508g0002.1	33	33	17	63	32	38	15	20
NbC24277801g0001.1	1496	847	796	1047	1235	946	1435	438
NbC24277989g0001.1	0	0	1	0	2	3	5	1
NbC24280181g0001.1	0	0	0	0	0	0	0	0
NbC24280623g0001.1	17	12	12	32	42	27	33	12
NbC24280825g0001.1	0	0	0	0	0	0	0	0
NbC24281017g0001.1	7	3	3	18	9	14	7	4
NbC24283893g0001.1	28	27	31	65	49	52	34	25
NbC24284457g0001.1	0	0	0	0	0	0	0	0
NbC24284759g0001.1	0	0	0	0	0	0	0	0
NbC24288391g0001.1	6	4	3	11	21	8	5	4
NbC24288691g0001.1	263	247	264	847	527	600	390	262
NbC24289433g0001.1	0	0	0	0	0	0	0	0
NbC24289509g0001.1	0	0	0	0	0	0	0	0
NbC24291285g0001.1	0	0	0	0	0	0	0	0
NbC24291329g0001.1	0	0	0	0	1	0	0	0
NbC24291861g0001.1	0	1	6	1	0	0	1	2
NbC24292479g0001.1	45	63	52	67	66	70	66	56
NbC24295021g0001.1	13	9	7	19	11	16	9	6
NbC24295431g0001.1	10	13	5	30	21	19	4	10
NbC24295873g0001.1	18	6	5	22	24	15	15	10
NbC24299909g0001.1	5	5	10	4	17	10	2	5
NbC24300479g0001.1	0	0	0	0	0	0	0	0
NbC24304474g0001.1	0	0	1	0	0	0	0	0
NbC24305910g0003.1	3	1	1	9	2	14	0	0
NbC24306238g0001.1	1	0	0	2	3	1	2	2
NbC24306440g0001.1	2	2	0	1	1	1	0	0
NbC24306746g0001.1	0	0	0	0	0	0	0	0
NbC24309810g0001.1	0	0	0	0	0	0	0	0
NbC24310440g0001.1	4	6	0	14	13	12	3	8
NbC24313821g0001.1	0	0	0	0	0	0	0	0
NbC24315517g0001.1	42	46	13	78	121	82	24	54
NbC24315801g0001.1	13	6	2	26	34	31	13	14
NbC24316409g0001.1	0	0	0	0	0	0	0	0
NbC24317313g0001.1	0	0	0	0	0	0	0	0
NbC24318537g0001.1	0	0	0	0	0	0	0	0
NbC24318573g0001.1	0	0	0	0	0	0	0	0
NbC24320504g0001.1	60	43	36	117	79	87	65	46
NbC24320562g0002.1	1	3	4	5	7	8	3	0
NbC24322870g0002.1	0	0	0	0	0	0	0	0
NbC24324645g0001.1	0	0	0	0	0	0	0	0
NbC24325668g0001.1	0	0	0	0	0	0	0	0
NbC24327056g0002.1	0	0	0	0	0	0	0	0
NbC24327324g0001.1	0	0	0	0	0	0	0	0
NbC24328456g0001.1	10	4	26	41	29	17	33	2
NbC24328462g0001.1	7	6	10	16	20	22	12	16
NbC24328708g0001.1	0	0	0	1	0	1	0	0
NbC24330142g0001.1	5	3	13	29	21	8	9	7
NbC24331615g0001.1	0	0	0	0	0	0	0	0
NbC24334085g0001.1	28	29	26	72	60	54	45	24
NbC24334531g0001.1	3	3	1	1	1	5	3	6
NbC24340124g0001.1	3	1	4	11	9	10	7	5
NbC24340880g0001.1	8	3	5	15	9	10	11	4
NbC24341070g0001.1	140	132	221	373	351	269	278	114
NbC24341262g0001.1	4	5	5	17	11	6	12	4
NbC24343292g0001.1	0	0	0	0	0	0	0	0
NbC24344652g0003.1	0	0	0	0	0	0	0	0
NbC24346930g0001.1	0	0	0	1	0	0	2	0
NbC24347764g0001.1	2	0	0	5	4	1	2	1
NbC24348328g0001.1	0	0	0	0	0	0	0	0
NbC24350532g0001.1	7	5	13	21	37	10	14	4
NbC24354158g0001.1	0	0	1	6	5	4	0	0
NbC24355542g0001.1	0	0	0	0	0	0	0	0
NbC24356826g0001.1	0	0	0	0	0	0	0	0
NbC24360106g0002.1	0	0	0	0	0	0	0	0
NbC24364439g0001.1	2	0	0	1	0	1	1	0
NbC24366242g0001.1	0	0	0	0	0	0	0	0
NbC24366726g0001.1	0	0	0	0	0	0	0	0
NbC24366752g0001.1	14	9	12	29	19	12	9	7
NbC24367018g0001.1	0	0	4	7	2	2	3	0
NbC24368450g0001.1	26	45	14	52	57	68	22	12
NbC24368540g0001.1	6	4	10	12	11	8	6	3
NbC24371234g0001.1	0	0	0	0	0	0	0	0
NbC24372469g0001.1	0	5	1	15	4	7	2	2
NbC24379349g0001.1	35	34	38	98	84	89	49	36
NbC24381833g0002.1	18	17	17	30	23	24	25	8
NbC24390435g0001.1	815	770	465	1533	1279	1275	715	546
NbC24390909g0002.1	0	0	0	1	0	0	1	0
NbC24391577g0001.1	7	15	7	20	18	36	5	6
NbC24394344g0001.1	0	0	0	0	0	0	0	0
NbC24394706g0001.1	17	12	33	58	36	40	29	8
NbC24395170g0001.1	0	0	0	0	0	0	0	0
NbC24395446g0001.1	0	0	0	0	0	0	0	0
NbC24396106g0001.1	0	0	0	0	0	0	0	0
NbC24397256g0001.1	7	4	6	12	16	10	14	8
NbC24398580g0001.1	0	0	0	0	0	0	0	0
NbC24399356g0001.1	0	0	0	0	0	0	0	0
NbC24400184g0001.1	0	0	0	0	0	0	0	0
NbC24400266g0001.1	53	44	21	84	77	68	44	36
NbC24400462g0001.1	0	0	0	0	0	0	0	0
NbC24401282g0001.1	0	0	0	0	0	0	0	0
NbC24402220g0001.1	11	8	5	12	12	16	7	7
NbC24406826g0002.1	0	1	0	1	0	1	0	0
NbC24409595g0001.1	0	0	0	0	0	0	0	0
NbC24411639g0002.1	0	0	0	0	0	0	0	0
NbC24412117g0001.1	251	218	165	495	360	341	240	215
NbC24412549g0001.1	0	0	0	0	0	0	0	0
NbC24413316g0001.1	0	0	0	0	0	0	0	0
NbC24418860g0001.1	0	0	0	0	0	0	0	0
NbC24420410g0001.1	0	3	0	4	6	2	2	0
NbC24424200g0001.1	3	2	1	7	2	4	2	2
NbC24426830g0001.1	0	0	0	0	0	0	0	0
NbC24428828g0001.1	255	258	127	438	461	462	177	156
NbC24429506g0001.1	0	0	0	0	0	0	0	0
NbC24429876g0001.1	3	9	8	10	15	17	1	4
NbC24430580g0001.1	0	0	0	0	0	0	0	0
NbC24431176g0001.1	0	0	0	0	0	0	0	0
NbC24431478g0001.1	19	23	32	36	52	50	33	16
NbC24432160g0001.1	47	37	23	76	83	65	36	29
NbC24433002g0002.1	0	0	0	0	0	0	0	0
NbC24436254g0001.1	0	0	0	0	0	0	0	0
NbC24436776g0001.1	9	7	5	14	12	10	10	4
NbC24441862g0001.1	0	0	0	0	0	0	0	0
NbC24451218g0004.1	6	6	1	4	5	9	7	4
NbC24455010g0001.1	0	1	0	0	0	0	1	0
NbC24459109g0001.1	35	27	32	70	75	71	42	38
NbC24461587g0001.1	0	0	0	0	0	0	0	0
NbC24461651g0001.1	1	5	0	3	4	2	1	0
NbC24462717g0001.1	0	0	0	0	0	0	0	0
NbC24464241g0001.1	0	0	0	0	0	0	0	0
NbC24467427g0002.1	148	148	72	221	112	129	112	95
NbC24470699g0001.1	0	0	0	0	0	0	0	0
NbC24473429g0001.1	0	0	0	0	0	0	0	0
NbC24473619g0001.1	0	0	0	0	0	0	0	0
NbC24475291g0001.1	4	12	2	17	23	14	12	6
NbC24476571g0001.1	18	19	19	53	18	34	17	11
NbC24480391g0001.1	291	301	193	482	378	481	278	244
NbC24481635g0001.1	27	31	22	60	33	44	24	12
NbC24485716g0001.1	11	15	13	33	36	47	29	18
NbC24487003g0002.1	0	0	0	0	0	0	0	0
NbC24487619g0001.1	132	140	139	331	215	228	124	69
NbC24488099g0001.1	0	0	0	0	0	0	0	0
NbC24489903g0001.1	10	15	11	29	33	22	19	10
NbC24489973g0001.1	30	15	31	58	60	60	36	23
NbC24492183g0001.1	36	33	72	78	76	57	58	23
NbC24493575g0002.1	0	0	0	0	0	0	0	0
NbC24497165g0001.1	0	0	0	0	0	0	0	0
NbC24499537g0001.1	1	4	2	1	4	8	2	4
NbC24502407g0001.1	63	55	41	121	71	83	55	46
NbC24502731g0001.1	5	7	7	23	7	9	6	6
NbC24504132g0002.1	0	0	0	0	0	0	0	0
NbC24504144g0001.1	1	1	3	4	2	3	4	1
NbC24504970g0001.1	0	0	0	0	0	0	0	0
NbC24505368g0001.1	0	0	0	0	0	0	0	0
NbC24505564g0001.1	0	0	0	5	15	9	202	102
NbC24505958g0001.1	51	60	71	128	120	111	100	37
NbC24506604g0001.1	0	0	1	0	1	0	0	0
NbC24507084g0001.1	1	1	2	7	1	1	2	2
NbC24507900g0001.1	0	0	0	0	0	0	0	0
NbC24508356g0003.1	21	22	31	57	68	49	45	21
NbC24508814g0001.1	49	36	11	92	56	53	33	42
NbC24511048g0001.1	62	63	138	201	161	125	189	59
NbC24511838g0001.1	1	0	0	0	0	0	0	0
NbC24512192g0001.1	0	0	0	0	0	0	0	0
NbC24517468g0001.1	0	0	0	0	0	0	0	0
NbC24519407g0001.1	8	30	18	75	36	43	19	26
NbC24520157g0001.1	235	213	455	574	525	411	570	199
NbC24520597g0001.1	3	6	1	10	14	5	4	4
NbC24520891g0001.1	0	0	0	0	0	0	0	0
NbC24523087g0002.1	0	0	0	0	0	0	0	0
NbC24524455g0001.1	6	4	4	14	7	7	7	7
NbC24525401g0002.1	0	0	0	0	0	0	0	0
NbC24525610g0001.1	0	0	0	0	0	0	0	0
NbC24525658g0001.1	2	1	0	3	2	2	1	0
NbC24525660g0001.1	30	20	22	56	64	23	36	11
NbC24526566g0001.1	13	8	7	15	11	9	7	9
NbC24526664g0001.1	13	11	24	47	40	34	33	10
NbC24528422g0001.1	0	0	0	0	0	0	0	0
NbC24530701g0001.1	0	0	0	0	0	0	0	0
NbC24533369g0001.1	1	2	6	12	3	8	5	3
NbC24534377g0001.1	7	6	6	23	23	21	5	3
NbC24534853g0001.1	0	0	0	0	0	0	0	0
NbC24536919g0001.1	7	4	4	19	22	10	2	4
NbC24537800g0001.1	0	0	1	2	4	1	1	1
NbC24537988g0003.1	85	62	54	134	186	152	78	63
NbC24538624g0001.1	1	1	1	2	2	1	3	0
NbC24541842g0001.1	4	6	7	17	14	12	15	5
NbC24542508g0001.1	0	0	0	0	0	0	0	0
NbC24544806g0001.1	6	2	0	13	15	18	1	3
NbC24545624g0001.1	1	0	2	4	4	1	0	1
NbC24547728g0001.1	6	17	3	7	19	12	9	11
NbC24548146g0003.1	110	118	99	252	168	172	127	67
NbC24552726g0002.1	0	0	0	0	0	0	0	0
NbC24557587g0002.1	0	0	0	0	0	0	0	0
NbC24562167g0001.1	0	0	0	0	0	0	0	0
NbC24565114g0001.1	0	0	0	1	0	0	0	0
NbC24565376g0001.1	13	12	5	17	18	35	10	8
NbC24566602g0001.1	4	6	6	5	10	17	8	7
NbC24566898g0001.1	0	0	0	0	0	0	0	0
NbC24568014g0003.1	0	0	0	0	0	0	0	0
NbC24568733g0003.1	0	0	0	0	0	0	0	0
NbC24569821g0001.1	0	0	0	0	0	0	0	0
NbC24572623g0001.1	0	0	0	0	0	0	0	0
NbC24572971g0001.1	4	1	0	4	0	1	0	1
NbC24575021g0001.1	0	0	0	0	0	0	0	0
NbC24577961g0001.1	0	0	0	0	0	1	0	0
NbC24578719g0002.1	0	0	0	0	0	0	0	0
NbC24578849g0001.1	2	10	3	17	20	12	9	5
NbC24582711g0001.1	0	0	0	0	0	0	0	0
NbC24582927g0001.1	0	0	0	0	0	0	0	0
NbC24586316g0001.1	0	0	0	0	0	0	0	0
NbC24587126g0001.1	0	1	0	0	0	0	2	0
NbC24587574g0002.1	0	0	0	0	0	0	0	0
NbC24588272g0002.1	11	21	36	45	71	43	41	9
NbC24589799g0001.1	13	14	13	29	23	25	26	9
NbC24594571g0001.1	0	0	0	0	0	0	0	0
NbC24597217g0001.1	0	0	0	0	0	1	0	1
NbC24599213g0001.1	0	0	0	0	0	0	0	0
NbC24604416g0003.1	22	14	22	42	66	37	27	16
NbC24606714g0001.1	6	3	6	12	7	8	4	0
NbC24608926g0002.1	0	0	0	0	0	0	0	0
NbC24612287g0001.1	0	0	0	0	0	0	0	0
NbC24614776g0001.1	3	1	1	8	7	1	1	0
NbC24619590g0001.1	4	4	5	25	15	16	10	7
NbC24621828g0001.1	0	0	0	0	0	0	0	0
NbC24624098g0001.1	0	0	0	0	0	0	0	0
NbC24627104g0001.1	2	0	0	2	0	1	2	0
NbC24627692g0001.1	11	16	11	25	19	29	15	20
NbC24628394g0001.1	10	15	14	31	33	26	17	11
NbC24628458g0001.1	0	0	0	0	0	0	0	0
NbC24634292g0001.1	34	30	25	83	71	67	51	34
NbC24638936g0001.1	40	40	30	87	83	80	47	23
NbC24642789g0002.1	0	0	2	2	1	1	0	0
NbC24645075g0001.1	0	0	0	0	0	0	0	1
NbC24645317g0001.1	12	10	2	19	19	12	9	7
NbC24649255g0001.1	4	5	4	8	8	5	4	0
NbC24653347g0001.1	0	0	0	0	0	0	0	0
NbC24653948g0001.1	0	0	0	0	0	0	0	0
NbC24655598g0001.1	0	0	0	0	0	0	0	0
NbC24656696g0001.1	52	53	45	90	92	86	57	27
NbC24659204g0001.1	35	34	43	95	87	64	60	28
NbC24659670g0001.1	0	0	0	0	0	0	0	0
NbC24662076g0001.1	0	0	0	0	0	3	0	0
NbC24662774g0001.1	11	6	8	36	27	24	11	6
NbC24663448g0001.1	22	9	14	27	28	20	27	11
NbC24665136g0001.1	0	0	0	0	0	0	0	0
NbC24668437g0001.1	0	0	0	0	0	0	0	0
NbC24669507g0001.1	0	0	0	0	0	0	0	0
NbC24672410g0001.1	20	27	41	35	39	31	42	13
NbC24672974g0001.1	122	128	134	269	235	266	216	154
NbC24677721g0002.1	6	3	2	10	6	9	9	2
NbC24678041g0001.1	73	81	102	261	98	113	121	53
NbC24680105g0001.1	0	0	0	0	0	0	0	0
NbC24680907g0001.1	0	0	0	0	0	0	0	0
NbC24681446g0001.1	0	0	0	0	0	0	0	0
NbC24682834g0002.1	0	0	0	0	0	0	0	0
NbC24684302g0001.1	22	20	19	58	37	30	27	18
NbC24685187g0001.1	10	7	1	8	3	4	1	1
NbC24686985g0001.1	17	21	16	37	15	28	26	15
NbC24689852g0001.1	16	18	13	45	33	25	12	16
NbC24690226g0001.1	0	0	0	0	0	0	0	0
NbC24695664g0001.1	0	0	0	0	0	0	0	1
NbC24695926g0001.1	0	0	2	1	0	0	1	0
NbC24697222g0001.1	0	0	0	0	0	0	0	0
NbC24698692g0001.1	9	11	15	27	30	20	10	13
NbC24699020g0001.1	0	0	0	0	0	0	0	0
NbC24700386g0001.1	2	1	2	1	2	0	4	0
NbC24702934g0001.1	0	0	0	0	0	0	0	0
NbC24706158g0001.1	132	139	75	225	149	218	97	121
NbC24707074g0001.1	14	23	20	40	37	18	20	14
NbC24708026g0001.1	0	0	0	0	0	0	0	0
NbC24712036g0001.1	11	6	9	17	23	14	8	16
NbC24713464g0001.1	13	10	12	37	12	31	10	10
NbC24719446g0002.1	17	16	20	46	45	41	20	16
NbC24721638g0002.1	0	0	0	0	0	0	0	0
NbC24721690g0001.1	0	0	0	0	0	0	0	0
NbC24725892g0001.1	0	0	0	0	0	0	0	0
NbC24726616g0003.1	0	0	0	0	0	0	1	1
NbC24727583g0002.1	46	50	43	113	73	79	56	25
NbC24729591g0004.1	22	29	24	71	9	43	40	23
NbC24733189g0001.1	10	9	4	18	6	6	2	7
NbC24739682g0001.1	0	0	0	0	0	0	0	0
NbC24741200g0001.1	140	150	111	121	207	182	170	113
NbC24741618g0001.1	2	0	0	0	2	0	0	0
NbC24744037g0001.1	0	0	0	0	0	0	0	0
NbC24745293g0001.1	0	0	0	0	0	0	0	0
NbC24747126g0001.1	9	7	4	12	16	13	7	6
NbC24749394g0001.1	0	0	0	0	0	0	0	0
NbC24749848g0001.1	1	2	1	4	3	3	0	4
NbC24750464g0001.1	70	65	99	190	128	131	132	55
NbC24751120g0001.1	7	3	11	20	21	18	11	4
NbC24752213g0001.1	0	0	0	0	0	0	0	0
NbC24754989g0004.1	0	0	0	0	0	0	0	0
NbC24759593g0001.1	0	0	0	0	0	0	0	0
NbC24761720g0001.1	54	43	34	129	114	93	54	51
NbC24761788g0001.1	1	1	3	1	0	1	1	0
NbC24762244g0001.1	0	0	0	0	0	0	0	0
NbC24763268g0002.1	0	0	0	0	0	0	0	0
NbC24763982g0001.1	0	0	0	0	0	0	0	0
NbC24763982g0002.1	0	0	0	0	0	0	0	0
NbC24769987g0002.1	3	2	3	11	8	6	5	4
NbC24770967g0001.1	27	24	12	35	35	31	23	14
NbC24773510g0002.1	0	0	0	0	0	0	0	0
NbC24774998g0001.1	0	0	0	0	0	0	0	0
NbC24776685g0001.1	1	1	5	13	2	3	2	2
NbC24780089g0002.1	0	0	0	0	0	0	0	0
NbC24784888g0001.1	16	6	7	11	27	11	11	14
NbC24785424g0001.1	47	46	46	163	105	85	66	39
NbC24794875g0001.1	20	9	15	55	54	43	22	11
NbC24805505g0002.1	0	0	0	0	0	0	0	0
NbC24806523g0001.1	6	3	1	16	17	14	7	13
NbC24808003g0001.1	0	0	0	0	0	0	0	0
NbC24809697g0001.1	28	22	32	80	81	73	57	18
NbC24812457g0001.1	22	14	21	41	47	29	27	14
NbC24812705g0001.1	0	0	0	0	17	17	0	0
NbC24817981g0001.1	0	0	0	0	0	0	0	0
NbC24826348g0001.1	0	0	0	0	0	0	0	0
NbC24830109g0002.1	63	55	44	114	133	99	51	42
NbC24831481g0001.1	19	19	25	47	40	33	26	15
NbC24831967g0001.1	39	52	66	98	73	77	79	42
NbC24832455g0001.1	0	1	9	5	5	3	5	0
NbC24834868g0001.1	0	0	0	0	0	0	0	0
NbC24835624g0001.1	0	1	1	0	2	0	1	0
NbC24836152g0001.1	0	0	0	0	0	0	0	0
NbC24838113g0001.1	12	18	21	19	13	34	18	15
NbC24844749g0001.1	0	0	0	2	0	1	0	0
NbC24845579g0001.1	6	11	12	42	27	17	12	10
NbC24850869g0001.1	0	0	0	0	0	0	0	0
NbC24851627g0002.1	25	14	24	51	41	38	24	13
NbC24852409g0002.1	0	0	1	1	0	1	0	0
NbC24853224g0001.1	0	0	0	0	0	0	0	0
NbC24853968g0001.1	1	1	6	0	2	3	11	3
NbC24855640g0001.1	0	0	0	0	0	0	0	0
NbC24856108g0002.1	5	17	9	31	18	28	28	12
NbC24857782g0001.1	158	163	198	312	310	379	217	178
NbC24860155g0001.1	4	3	3	13	6	9	1	1
NbC24863206g0001.1	1531	1474	1044	1969	2193	2109	1760	1102
NbC24865086g0001.1	1	0	0	0	0	0	0	0
NbC24865120g0001.1	8	16	20	18	20	29	12	8
NbC24869503g0001.1	88	106	139	221	218	216	137	69
NbC24869955g0002.1	0	0	0	0	0	0	0	0
NbC24872723g0001.1	181	110	405	390	696	394	197	68
NbC24873641g0001.1	2	4	3	12	7	8	1	4
NbC24874511g0001.1	0	0	0	0	0	0	0	0
NbC24882769g0004.1	0	1	0	0	2	0	0	0
NbC24885311g0002.1	0	0	0	0	0	0	0	0
NbC24885355g0001.1	0	1	0	1	0	0	0	0
NbC24888753g0001.1	3	2	4	14	6	3	3	1
NbC24891365g0001.1	1	0	1	5	1	1	1	0
NbC24891847g0001.1	5	4	5	7	4	4	5	1
NbC24893263g0001.1	52	50	83	165	75	78	126	36
NbC24894711g0001.1	0	0	0	0	0	0	0	0
NbC24897841g0001.1	4	1	1	6	11	4	6	2
NbC24900359g0002.1	0	0	0	0	0	0	0	0
NbC24903745g0001.1	0	0	0	0	0	0	0	0
NbC24906009g0002.1	0	0	0	1	0	0	0	0
NbC24906815g0002.1	78	66	36	114	91	102	62	49
NbC24909401g0001.1	22	29	61	61	57	41	60	27
NbC24910481g0002.1	0	0	0	0	0	0	0	0
NbC24913326g0003.1	0	0	0	0	0	0	0	0
NbC24913444g0001.1	13	11	6	20	20	19	10	13
NbC24913778g0001.1	0	0	0	0	0	0	0	0
NbC24918872g0001.1	0	0	0	0	0	0	0	0
NbC24921494g0001.1	0	0	0	0	0	0	0	0
NbC24924342g0001.1	0	1	1	1	1	1	0	0
NbC24930174g0001.1	15	13	29	46	68	34	42	25
NbC24938493g0001.1	2	1	4	9	9	13	2	2
NbC24939853g0001.1	61	69	34	97	76	85	63	44
NbC24940971g0002.1	24	20	38	50	39	25	32	24
NbC24947986g0001.1	76	61	75	157	118	74	151	58
NbC24948044g0003.1	60	67	65	157	119	117	69	60
NbC24948066g0001.1	6	7	2	14	14	9	0	2
NbC24951450g0001.1	14	26	26	49	35	33	44	18
NbC24952794g0001.1	0	0	0	0	0	0	0	0
NbC24957264g0001.1	0	0	0	0	0	0	0	0
NbC24960012g0001.1	0	0	0	0	0	0	0	0
NbC24960250g0001.1	0	0	0	1	2	0	3	0
NbC24968109g0001.1	0	0	2	0	0	0	0	0
NbC24970347g0001.1	0	0	0	0	0	0	0	0
NbC24974876g0004.1	0	0	0	0	0	0	0	0
NbC24976872g0001.1	5	7	10	33	36	29	17	4
NbC24977374g0001.1	0	0	0	0	0	0	2	0
NbC24980350g0001.1	0	0	0	0	0	0	0	0
NbC24986921g0002.1	10	19	18	31	22	21	16	7
NbC24991624g0004.1	0	0	0	1	0	0	0	0
NbC24991650g0001.1	14	28	15	42	34	43	25	21
NbC24992549g0001.1	0	0	0	0	0	0	0	0
NbC24993801g0001.1	0	0	1	3	1	2	2	0
NbC24994109g0001.1	0	0	0	0	0	0	0	0
NbC24996353g0001.1	0	0	0	0	0	0	0	0
NbC24997071g0003.1	49	66	92	133	102	95	96	28
NbC24997187g0001.1	0	0	0	0	0	0	0	0
NbC25006242g0001.1	0	0	0	0	0	0	0	0
NbC25012918g0001.1	0	0	0	0	0	0	0	0
NbC25013732g0001.1	0	0	0	0	0	0	0	0
NbC25015814g0002.1	177	183	204	237	257	391	331	221
NbC25017546g0001.1	0	0	0	0	0	0	0	0
NbC25018054g0001.1	0	0	0	1	0	0	0	0
NbC25018256g0002.1	0	0	0	0	0	0	0	0
NbC25023538g0001.1	0	0	0	0	0	0	0	0
NbC25026368g0001.1	2	3	7	3	7	2	10	4
NbC25026452g0001.1	32	14	33	71	80	40	49	16
NbC25027380g0001.1	0	0	0	0	0	0	0	1
NbC25030171g0001.1	1	2	5	3	2	5	1	0
NbC25031809g0001.1	13	11	10	20	24	11	13	11
NbC25032573g0001.1	185	212	238	460	288	363	336	148
NbC25033439g0001.1	73	56	68	175	171	136	117	59
NbC25044046g0001.1	0	0	0	0	0	2	0	0
NbC25044428g0001.1	25	17	20	57	56	66	38	25
NbC25044800g0001.1	0	0	0	0	0	0	0	0
NbC25045272g0001.1	0	0	0	0	0	0	0	0
NbC25046957g0002.1	0	1	1	2	2	7	5	3
NbC25047561g0001.1	36	35	35	71	85	51	36	18
NbC25047921g0002.1	0	0	0	0	0	0	0	0
NbC25049237g0001.1	6	12	3	5	15	10	14	5
NbC25049237g0003.1	0	2	4	7	5	4	2	2
NbC25053203g0001.1	118	117	68	237	108	184	123	91
NbC25054247g0001.1	46	49	90	111	147	104	98	38
NbC25055943g0001.1	0	0	0	0	0	0	0	0
NbC25058979g0002.1	0	0	0	0	0	0	0	0
NbC25060269g0004.1	0	0	0	0	0	0	0	0
NbC25062241g0001.1	23	40	45	42	44	54	43	19
NbC25064010g0003.1	14	9	11	37	6	16	9	7
NbC25064786g0003.1	1	0	1	2	1	0	1	0
NbC25065720g0001.1	9	9	5	15	15	9	10	3
NbC25066442g0001.1	0	0	0	0	0	0	0	0
NbC25067248g0001.1	113	92	118	237	214	183	197	91
NbC25072990g0001.1	0	0	0	0	0	0	0	0
NbC25074434g0003.1	0	0	0	0	0	0	0	0
NbC25080844g0002.1	0	0	0	0	0	0	0	0
NbC25086184g0001.1	21	22	15	50	27	34	26	12
NbC25090256g0001.1	14	24	66	52	41	75	79	55
NbC25094730g0004.1	24	29	45	56	56	43	29	12
NbC25094798g0001.1	0	0	0	0	0	0	0	0
NbC25096554g0001.1	21	16	13	19	18	21	23	7
NbC25106134g0002.1	163	158	167	198	209	233	228	177
NbC25108153g0001.1	0	0	0	0	0	0	0	0
NbC25108803g0002.1	0	0	0	0	0	0	0	0
NbC25109491g0002.1	145	135	66	318	287	365	165	233
NbC25110210g0001.1	82	84	75	168	130	121	120	54
NbC25110576g0001.1	97	92	97	225	144	129	94	60
NbC25114498g0001.1	6	14	17	16	25	22	9	7
NbC25116922g0003.1	0	0	0	0	0	0	0	0
NbC25119354g0001.1	0	0	0	0	0	0	0	0
NbC25122200g0001.1	12	9	7	34	20	33	12	15
NbC25127544g0001.1	0	0	0	0	0	0	0	0
NbC25127942g0001.1	0	0	0	0	0	0	0	0
NbC25128768g0001.1	0	0	0	0	0	0	0	0
NbC25130590g0001.1	3	16	13	38	12	39	11	3
NbC25130936g0001.1	29	19	19	69	32	43	31	17
NbC25131950g0001.1	0	0	0	0	0	0	0	0
NbC25132074g0001.1	0	0	0	0	0	0	0	0
NbC25139596g0001.1	0	0	0	0	0	0	0	0
NbC25140862g0001.1	1	0	0	0	0	0	0	0
NbC25141560g0001.1	0	0	0	1	0	0	0	0
NbC25152424g0001.1	2	3	6	4	9	5	7	6
NbC25154325g0001.1	0	0	0	0	0	0	0	0
NbC25157863g0001.1	0	0	0	0	0	0	0	0
NbC25159256g0001.1	0	0	0	0	0	0	0	0
NbC25161161g0002.1	0	0	0	0	0	0	0	0
NbC25163953g0001.1	0	0	0	0	1	4	0	1
NbC25164779g0001.1	0	0	0	0	0	0	0	0
NbC25165618g0001.1	0	1	1	0	0	0	0	0
NbC25168558g0001.1	0	0	0	0	0	0	0	0
NbC25168844g0001.1	31	38	42	94	53	56	62	33
NbC25169022g0001.1	16	13	22	45	39	32	22	8
NbC25170424g0001.1	1	7	2	6	4	4	3	8
NbC25171638g0001.1	2	0	0	0	0	0	0	0
NbC25175289g0001.1	0	0	0	0	0	0	0	0
NbC25175489g0001.1	0	0	0	0	0	0	0	0
NbC25176843g0002.1	0	0	0	0	0	0	0	0
NbC25181938g0003.1	0	0	0	0	0	0	0	0
NbC25182766g0002.1	25	17	6	55	37	26	17	7
NbC25184358g0002.1	0	0	0	0	0	0	0	0
NbC25187796g0001.1	0	0	0	0	0	0	0	0
NbC25193361g0002.1	14	23	17	46	33	39	30	34
NbC25195299g0001.1	3	4	1	18	15	9	5	5
NbC25197443g0001.1	0	0	0	0	0	0	0	0
NbC25200960g0002.1	0	1	0	0	1	0	0	0
NbC25203143g0001.1	1	4	2	3	1	8	2	2
NbC25204749g0002.1	8	12	4	18	14	8	8	6
NbC25207939g0001.1	5	8	1	11	9	7	3	13
NbC25209412g0001.1	0	0	0	0	0	0	0	0
NbC25209911g0001.1	6	9	27	41	41	31	24	9
NbC25215415g0002.1	0	0	0	0	0	0	0	0
NbC25216307g0001.1	0	0	0	1	0	0	0	1
NbC25218513g0001.1	0	0	0	0	0	0	0	0
NbC25222233g0001.1	0	0	0	0	0	0	0	0
NbC25222459g0001.1	79	96	86	195	231	164	223	87
NbC25225469g0001.1	0	0	0	0	0	0	0	0
NbC25225475g0001.1	24	22	12	39	46	33	19	17
NbC25226993g0001.1	18	21	12	51	48	49	31	12
NbC25227573g0001.1	0	0	0	0	0	0	0	0
NbC25228197g0001.1	1	0	0	0	0	0	0	0
NbC25229091g0002.1	50	55	47	115	117	132	80	56
NbC25229575g0004.1	0	0	0	0	2	2	1	1
NbC25230684g0004.1	13	16	1	29	20	14	15	6
NbC25231990g0002.1	114	110	101	229	169	154	175	83
NbC25233207g0001.1	1443	876	1404	76	1951	95	1410	32
NbC25233718g0001.1	0	0	0	0	0	0	0	0
NbC25238246g0001.1	39	48	44	100	81	83	55	35
NbC25240390g0004.1	7	0	0	0	1	0	0	0
NbC25246750g0001.1	0	0	0	0	0	0	0	0
NbC25247182g0004.1	89	74	74	180	146	121	100	38
NbC25250105g0001.1	0	0	0	0	0	0	0	0
NbC25250883g0001.1	59	44	104	186	158	107	134	43
NbC25252651g0002.1	0	2	7	10	3	5	10	7
NbC25255290g0001.1	0	0	0	0	0	0	0	0
NbC25260144g0001.1	0	0	0	0	0	0	0	0
NbC25262916g0001.1	5	4	5	7	5	9	2	5
NbC25269519g0003.1	1	0	0	6	0	4	10	10
NbC25272402g0001.1	10	10	15	26	28	20	14	9
NbC25276195g0002.1	0	0	0	0	0	0	0	0
NbC25280995g0001.1	5	0	2	2	6	7	1	1
NbC25281249g0001.1	0	0	0	0	0	0	0	0
NbC25282771g0001.1	1	0	2	11	2	5	5	1
NbC25283545g0003.1	0	0	0	0	0	0	0	0
NbC25285878g0003.1	0	0	0	0	0	0	0	0
NbC25288816g0001.1	0	0	0	0	0	0	0	0
NbC25290370g0001.1	0	0	0	0	0	0	0	0
NbC25292626g0004.1	195	223	74	443	368	507	120	100
NbC25294182g0003.1	0	1	0	0	0	0	0	0
NbC25298496g0002.1	0	0	0	0	0	0	0	0
NbC25301342g0001.1	0	0	0	0	0	0	0	0
NbC25305509g0001.1	0	0	0	0	0	0	0	0
NbC25306105g0002.1	0	0	0	3	2	1	3	0
NbC25308622g0001.1	0	0	0	0	0	0	0	0
NbC25309595g0002.1	0	0	0	0	0	0	0	0
NbC25310765g0001.1	0	0	0	0	0	0	0	0
NbC25315011g0002.1	0	0	0	0	0	0	0	0
NbC25318866g0001.1	2	1	1	2	4	4	1	0
NbC25322432g0003.1	0	0	0	0	0	0	0	0
NbC25325964g0002.1	79	54	60	198	167	133	80	33
NbC25326593g0002.1	0	0	0	0	0	0	0	0
NbC25329354g0001.1	18	22	18	28	24	13	22	14
NbC25331100g0001.1	0	0	0	0	0	0	0	0
NbC25332356g0001.1	36	44	28	78	85	75	57	26
NbC25332466g0001.1	29	12	26	60	50	36	32	13
NbC25333688g0001.1	13	11	19	39	26	22	21	10
NbC25334576g0002.1	21	43	21	58	54	49	29	19
NbC25334910g0003.1	1	2	0	2	0	0	0	3
NbC25335888g0003.1	4	2	7	11	7	8	5	3
NbC25338748g0001.1	234	175	132	517	699	494	250	198
NbC25339958g0004.1	12	11	3	18	30	23	15	11
NbC25340200g0001.1	196	204	210	399	336	356	345	188
NbC25340731g0001.1	100	96	104	136	115	136	172	120
NbC25341501g0001.1	0	0	0	0	0	0	0	0
NbC25341561g0001.1	0	0	0	0	0	0	0	0
NbC25342301g0001.1	7	13	15	17	15	15	13	4
NbC25343935g0002.1	0	1	0	2	0	0	0	0
NbC25348596g0003.1	24	23	22	48	23	46	27	28
NbC25351445g0001.1	52	47	58	150	103	90	64	50
NbC25351981g0001.1	7	9	11	13	22	18	11	3
NbC25355161g0002.1	0	0	0	0	0	0	0	0
NbC25355827g0001.1	0	0	0	0	0	0	0	0
NbC25359043g0001.1	0	0	0	0	0	0	1	0
NbC25362752g0002.1	0	0	0	0	0	0	0	0
NbC25365687g0001.1	0	0	0	0	0	0	0	0
NbC25367760g0001.1	0	0	0	0	0	0	0	0
NbC25369236g0004.1	0	0	0	0	0	0	0	0
NbC25370632g0001.1	0	0	1	1	5	1	2	0
NbC25373325g0001.1	0	0	0	0	0	0	0	0
NbC25375173g0001.1	803	772	892	1293	1230	1450	647	433
NbC25380931g0001.1	4	3	6	12	21	11	16	8
NbC25381325g0002.1	44	60	78	126	86	106	82	54
NbC25382286g0002.1	67	61	119	157	117	83	109	33
NbC25387151g0001.1	0	0	0	0	1	1	0	0
NbC25387537g0001.1	13	9	20	28	32	21	22	13
NbC25388330g0001.1	0	2	1	2	1	0	3	0
NbC25391955g0001.1	0	0	1	3	4	2	0	2
NbC25394177g0001.1	0	0	0	0	0	0	0	0
NbC25394415g0003.1	0	0	0	0	0	0	0	0
NbC25394629g0001.1	557	543	674	1395	1218	1042	1152	598
NbC25397795g0001.1	0	2	2	1	2	4	2	0
NbC25398031g0002.1	32	39	42	107	89	72	54	24
NbC25400098g0001.1	29	29	22	54	82	66	18	17
NbC25400300g0001.1	18	21	45	81	62	78	33	20
NbC25400498g0001.1	113	102	152	250	213	184	157	109
NbC25401240g0002.1	336	358	423	886	796	745	544	395
NbC25406327g0001.1	0	0	0	0	0	0	0	0
NbC25406797g0001.1	0	0	0	0	0	0	0	0
NbC25411105g0001.1	54	72	69	131	81	84	81	50
NbC25412603g0001.1	0	0	0	0	0	0	0	0
NbC25413957g0004.1	16	19	19	33	27	19	18	7
NbC25415551g0001.1	0	0	0	0	0	0	0	0
NbC25415813g0001.1	147	112	190	316	304	275	304	150
NbC25419789g0002.1	15	20	19	61	63	61	29	34
NbC25423528g0001.1	9	9	12	11	12	8	6	4
NbC25425791g0001.1	9	5	8	9	7	5	9	2
NbC25426257g0001.1	0	0	0	0	0	0	0	0
NbC25427771g0002.1	50	50	26	110	127	111	36	73
NbC25434335g0004.1	1	0	1	4	1	2	5	2
NbC25434411g0004.1	179	205	113	353	345	327	202	132
NbC25434653g0004.1	0	0	0	0	0	0	0	0
NbC25445121g0004.1	0	0	0	0	0	0	0	0
NbC25449263g0001.1	0	0	0	0	0	0	0	0
NbC25452543g0002.1	237	257	285	547	402	345	362	182
NbC25455602g0003.1	0	0	0	0	0	0	1	0
NbC25456805g0001.1	20	15	20	45	63	39	26	18
NbC25458145g0001.1	33	24	13	43	48	40	16	22
NbC25459557g0001.1	4	8	3	8	15	11	9	5
NbC25460329g0003.1	0	0	0	0	0	0	0	0
NbC25462243g0001.1	22	24	34	72	80	41	42	18
NbC25462513g0003.1	7	8	2	17	7	7	5	4
NbC25467718g0001.1	0	0	0	0	0	0	0	0
NbC25467974g0002.1	34	31	40	67	79	71	59	25
NbC25469554g0001.1	0	0	0	0	0	0	0	0
NbC25470496g0001.1	30	34	56	90	69	64	86	40
NbC25472120g0003.1	16	21	23	32	24	27	19	8
NbC25474551g0001.1	6	6	9	16	23	19	16	7
NbC25477591g0001.1	0	0	0	0	0	0	0	0
NbC25479165g0001.1	1	6	0	7	5	10	0	5
NbC25479605g0003.1	0	0	0	0	0	0	0	0
NbC25479631g0003.1	9	14	10	18	30	12	8	2
NbC25480103g0002.1	0	0	0	0	0	1	1	0
NbC25480463g0001.1	8	8	11	17	31	16	7	4
NbC25480847g0002.1	84	69	115	215	148	137	60	52
NbC25482049g0001.1	14	21	18	29	31	14	23	11
NbC25490671g0001.1	0	0	0	0	0	0	0	0
NbC25491193g0002.1	0	0	0	0	0	0	0	0
NbC25491697g0001.1	1	1	2	7	9	14	3	3
NbC25495038g0001.1	20	28	25	28	33	38	19	12
NbC25495366g0001.1	129	145	108	244	234	195	182	131
NbC25496274g0002.1	1	0	0	5	1	2	0	0
NbC25496684g0001.1	0	0	0	0	0	0	0	0
NbC25498951g0003.1	578	538	321	570	867	855	577	532
NbC25499383g0002.1	0	0	0	0	0	0	0	0
NbC25499389g0001.1	1	3	16	19	20	17	14	7
NbC25501823g0001.1	0	0	0	0	0	0	1	0
NbC25501985g0003.1	0	0	0	0	0	0	0	0
NbC25502591g0001.1	2	0	0	3	3	4	3	2
NbC25509266g0003.1	0	0	1	3	5	2	1	2
NbC25510550g0001.1	0	0	0	0	0	0	0	0
NbC25513678g0001.1	206	194	167	273	384	281	336	156
NbC25515128g0001.1	1	0	0	0	1	0	1	0
NbC25517216g0001.1	8	5	13	9	15	15	7	6
NbC25517220g0002.1	3	1	7	3	2	4	6	3
NbC25518114g0001.1	0	0	1	3	4	3	0	1
NbC25518929g0001.1	32	29	23	51	53	51	119	70
NbC25519724g0001.1	0	0	0	1	0	0	0	0
NbC25520750g0001.1	17	13	12	48	46	33	26	12
NbC25523132g0001.1	0	0	0	0	0	0	0	0
NbC25524516g0001.1	53	53	74	104	93	80	115	32
NbC25527728g0001.1	0	0	0	0	0	0	0	0
NbC25529557g0001.1	0	0	0	0	0	0	0	0
NbC25532326g0003.1	12	18	31	47	47	38	22	12
NbC25532464g0001.1	44	64	70	73	70	97	117	81
NbC25534353g0001.1	20	19	19	42	43	48	37	22
NbC25535931g0004.1	17	18	17	34	33	17	15	11
NbC25545448g0001.1	0	0	0	0	0	0	0	0
NbC25546362g0001.1	4	5	6	7	6	3	7	1
NbC25546442g0001.1	4	7	10	9	8	17	10	6
NbC25548993g0001.1	0	0	0	0	0	0	0	0
NbC25549395g0001.1	34	26	51	93	50	67	48	28
NbC25549687g0001.1	6	6	12	20	34	8	15	12
NbC25555395g0001.1	1	0	2	3	7	1	4	2
NbC25556283g0001.1	0	0	0	0	0	0	0	0
NbC25557440g0002.1	2	4	3	8	6	7	6	3
NbC25558951g0002.1	0	0	0	0	0	0	0	0
NbC25559599g0003.1	185	187	312	533	460	382	439	240
NbC25561909g0004.1	142	175	183	364	286	304	240	164
NbC25563583g0001.1	0	1	0	0	3	0	1	1
NbC25563603g0001.1	0	0	0	1	1	1	0	0
NbC25564773g0005.1	0	0	0	0	0	0	0	0
NbC25569765g0001.1	23	23	23	56	52	40	26	20
NbC25571976g0001.1	0	0	0	0	0	1	0	0
NbC25572522g0003.1	96	145	126	273	318	272	281	138
NbC25572732g0004.1	1	2	2	2	3	4	1	0
NbC25573744g0001.1	1	2	1	4	0	3	0	0
NbC25574164g0001.1	0	0	0	0	0	2	1	0
NbC25574684g0001.1	5	13	4	15	22	22	28	12
NbC25577290g0001.1	7	9	8	4	8	4	9	0
NbC25581371g0003.1	25	24	23	38	14	23	9	6
NbC25582537g0001.1	1	3	0	2	1	0	2	1
NbC25584041g0001.1	51	38	33	126	115	88	51	31
NbC25585557g0003.1	0	0	0	0	0	0	0	0
NbC25587831g0001.1	0	0	0	0	0	0	0	0
NbC25588469g0003.1	0	0	0	0	0	0	0	0
NbC25589163g0001.1	0	0	0	0	0	0	0	0
NbC25589785g0001.1	0	0	0	0	0	0	0	0
NbC25591020g0001.1	5	5	6	18	10	8	9	2
NbC25593242g0002.1	0	0	0	0	0	0	0	0
NbC25595897g0001.1	63	51	54	99	87	79	79	47
NbC25599194g0001.1	0	0	0	0	0	0	0	0
NbC25601029g0002.1	0	0	0	0	0	0	0	0
NbC25602727g0003.1	0	0	0	0	0	0	0	0
NbC25603000g0001.1	0	0	0	0	0	0	0	0
NbC25604970g0001.1	16	16	17	46	47	25	36	16
NbC25605006g0001.1	0	0	0	0	0	0	0	0
NbC25605535g0003.1	445	406	345	825	758	663	558	361
NbC25608161g0002.1	0	0	0	0	0	0	0	0
NbC25616274g0002.1	2	1	2	2	1	3	0	0
NbC25618318g0002.1	0	0	0	0	0	0	0	0
NbC25618522g0001.1	1	9	11	14	4	11	1	1
NbC25620090g0001.1	0	0	0	0	0	0	0	0
NbC25620360g0001.1	0	0	0	0	0	0	0	0
NbC25621478g0001.1	0	0	0	0	0	0	0	0
NbC25621840g0003.1	14	11	4	48	52	34	7	21
NbC25622266g0001.1	35	55	65	148	84	101	66	39
NbC25623793g0002.1	0	0	0	0	0	0	0	0
NbC25626983g0004.1	76	82	63	112	90	113	58	44
NbC25628467g0002.1	6	5	7	12	8	7	2	4
NbC25629295g0001.1	0	0	0	0	0	0	0	0
NbC25635013g0001.1	25	16	36	39	60	43	32	12
NbC25635237g0001.1	26	31	15	27	32	47	27	19
NbC25635295g0003.1	0	0	0	0	0	0	0	0
NbC25639057g0004.1	0	0	2	2	2	8	1	0
NbC25640530g0001.1	0	0	0	0	0	0	0	0
NbC25641276g0002.1	27	37	24	71	55	53	29	14
NbC25642857g0002.1	0	0	0	0	0	0	0	0
NbC25643609g0002.1	0	0	0	0	0	0	1	0
NbC25648087g0002.1	0	0	0	0	0	1	2	0
NbC25648345g0002.1	104	112	60	178	169	191	107	89
NbC25652345g0002.1	54	49	56	136	115	98	58	56
NbC25652957g0001.1	0	1	2	7	4	3	6	2
NbC25653021g0002.1	35	32	43	87	77	68	72	32
NbC25653349g0002.1	0	1	1	0	0	1	1	0
NbC25653945g0001.1	5	4	4	5	5	6	3	2
NbC25655825g0001.1	0	0	0	0	0	0	0	0
NbC25655825g0003.1	0	0	0	0	0	0	0	0
NbC25657263g0004.1	8	9	8	26	17	13	10	8
NbC25658761g0001.1	0	0	0	0	0	0	0	0
NbC25660343g0001.1	23	17	12	45	17	28	9	18
NbC25663356g0002.1	1	2	0	0	3	0	0	0
NbC25663662g0001.1	13	10	31	49	65	58	94	56
NbC25665342g0001.1	18	15	21	35	37	29	42	15
NbC25667420g0004.1	1	8	6	17	10	11	1	1
NbC25667968g0003.1	12	11	16	30	27	11	19	10
NbC25670860g0002.1	0	0	0	0	0	0	0	0
NbC25671164g0001.1	0	0	0	0	0	0	0	0
NbC25671424g0003.1	89	61	76	164	116	95	87	40
NbC25671890g0001.1	35	30	75	97	86	57	56	24
NbC25673544g0001.1	0	0	0	0	0	0	0	0
NbC25673618g0001.1	0	0	0	0	0	0	0	0
NbC25677456g0001.1	0	0	0	0	0	0	0	0
NbC25677626g0003.1	0	7	7	9	5	5	6	4
NbC25681456g0001.1	14	7	17	27	24	29	12	12
NbC25684863g0005.1	0	0	0	0	1	0	2	0
NbC25685337g0001.1	3	0	2	3	2	1	7	3
NbC25687762g0001.1	0	0	0	0	0	0	0	0
NbC25687762g0002.1	6	7	6	7	6	6	6	4
NbC25688148g0004.1	0	0	0	0	0	0	0	0
NbC25689488g0001.1	0	0	0	0	0	0	0	0
NbC25691955g0002.1	78	71	74	166	136	155	107	70
NbC25691989g0001.1	5	4	11	13	8	4	4	2
NbC25692979g0001.1	0	0	0	0	0	0	0	0
NbC25693253g0001.1	0	0	0	0	0	0	0	0
NbC25693253g0003.1	0	2	0	0	2	1	1	1
NbC25693309g0001.1	14	14	8	18	19	17	7	9
NbC25707272g0001.1	0	0	1	0	0	0	0	0
NbC25710626g0004.1	14	11	9	28	16	41	14	5
NbC25710986g0001.1	26	18	12	37	22	16	15	14
NbC25712540g0001.1	6	4	2	8	10	7	5	0
NbC25715430g0001.1	23	16	24	56	38	27	28	15
NbC25716275g0002.1	22	5	15	18	24	20	16	17
NbC25717203g0003.1	107	97	103	215	202	194	92	54
NbC25717912g0001.1	2	0	1	0	3	0	1	0
NbC25723818g0003.1	0	0	0	0	0	0	0	0
NbC25723818g0004.1	0	0	0	0	0	0	0	0
NbC25723900g0002.1	0	0	0	0	0	0	0	0
NbC25723962g0001.1	0	0	0	0	0	0	0	0
NbC25726108g0004.1	17	12	19	37	27	32	27	15
NbC25730842g0001.1	19	20	19	43	47	25	25	22
NbC25736581g0001.1	0	0	0	0	0	0	0	0
NbC25736581g0002.1	0	0	0	0	0	0	0	0
NbC25737543g0001.1	5922	5463	5866	10301	9313	8674	10229	4282
NbC25737819g0004.1	1	1	2	2	3	5	1	0
NbC25737997g0001.1	312	308	297	685	547	519	371	230
NbC25741673g0001.1	2	1	1	3	1	3	0	1
NbC25741991g0001.1	752	684	720	1588	1233	1375	1052	533
NbC25742659g0003.1	0	0	0	0	0	0	0	0
NbC25743683g0001.1	25	21	33	58	52	43	26	10
NbC25746356g0001.1	0	0	0	0	0	0	0	0
NbC25746356g0002.1	0	0	0	0	0	0	0	0
NbC25747906g0002.1	99	91	114	229	171	158	127	78
NbC25748590g0001.1	4	0	1	0	5	0	0	0
NbC25750669g0001.1	0	0	0	0	0	0	0	0
NbC25752231g0001.1	0	0	0	0	0	0	0	0
NbC25753181g0001.1	0	0	0	0	0	0	0	0
NbC25755356g0001.1	0	0	0	0	0	0	0	0
NbC25756172g0001.1	16	11	12	42	47	36	19	23
NbC25757468g0001.1	11	10	13	20	21	22	9	13
NbC25758006g0002.1	0	0	0	1	2	0	0	0
NbC25763594g0001.1	1	4	4	13	16	20	7	9
NbC25765836g0001.1	0	0	0	0	0	0	0	0
NbC25766560g0001.1	27	15	23	55	51	26	37	10
NbC25768054g0001.1	872	1599	1210	2706	1309	2248	1785	1598
NbC25768282g0003.1	0	0	0	0	0	0	0	0
NbC25768428g0001.1	16	9	12	25	48	36	16	18
NbC25769666g0001.1	1	0	1	0	1	0	0	1
NbC25776848g0001.1	0	0	0	0	0	0	0	0
NbC25778173g0001.1	0	0	0	1	0	0	0	0
NbC25779787g0001.1	0	0	0	0	0	0	0	0
NbC25779847g0001.1	91	51	91	231	136	159	114	69
NbC25780041g0002.1	0	0	0	0	0	0	0	0
NbC25780041g0004.1	0	0	0	1	0	1	2	0
NbC25780377g0001.1	48	54	30	85	72	100	51	36
NbC25782575g0001.1	5	7	3	8	0	22	1	1
NbC25785650g0001.1	0	0	0	0	0	0	1	0
NbC25785692g0002.1	0	0	0	0	0	0	0	0
NbC25786612g0002.1	0	1	0	0	1	0	0	0
NbC25787138g0001.1	24	18	19	59	59	50	23	14
NbC25788052g0001.1	0	0	0	0	0	0	0	0
NbC25789814g0001.1	1	5	4	7	8	7	5	4
NbC25790268g0001.1	38	48	44	65	59	55	51	30
NbC25790890g0001.1	106	107	132	208	147	152	127	63
NbC25791808g0002.1	0	1	0	2	1	1	1	1
NbC25792721g0002.1	26	23	29	59	54	38	38	15
NbC25792767g0001.1	2	5	8	10	5	19	1	0
NbC25793147g0001.1	6	11	3	11	11	15	11	4
NbC25793177g0003.1	2	0	5	16	15	28	3	9
NbC25793441g0001.1	0	0	0	0	0	0	0	0
NbC25793791g0004.1	64	66	81	171	198	159	99	66
NbC25794395g0003.1	138	222	153	377	266	354	118	60
NbC25794902g0001.1	0	0	0	1	2	0	0	1
NbC25797382g0001.1	8	8	18	26	40	19	24	16
NbC25798132g0003.1	0	0	0	0	0	0	0	0
NbC25800175g0001.1	17	17	14	31	40	41	21	17
NbC25800495g0002.1	0	1	0	0	2	0	0	0
NbC25800495g0003.1	0	0	1	1	1	0	0	0
NbC25802181g0002.1	0	1	0	0	1	2	1	0
NbC25806234g0001.1	0	0	0	0	0	0	0	0
NbC25806480g0001.1	0	0	0	0	0	0	0	0
NbC25807550g0002.1	0	0	0	0	0	0	0	0
NbC25808748g0004.1	41	43	68	118	111	107	84	46
NbC25809920g0004.1	0	0	0	0	0	0	0	0
NbC25811308g0003.1	21	23	13	49	55	37	36	27
NbC25811466g0001.1	0	0	0	0	0	0	0	0
NbC25811859g0003.1	82	75	81	215	120	119	109	50
NbC25811939g0001.1	0	0	0	0	0	0	0	0
NbC25811941g0003.1	74	67	81	152	67	96	13	16
NbC25812549g0001.1	32	22	33	53	91	66	46	33
NbC25813243g0002.1	22	25	23	59	43	42	34	12
NbC25814693g0002.1	223	242	142	466	259	367	218	162
NbC25815598g0002.1	0	0	0	0	0	0	0	0
NbC25816420g0002.1	0	0	0	0	0	0	0	0
NbC25816882g0004.1	220	172	288	426	398	351	376	150
NbC25816994g0001.1	1	0	0	0	1	1	0	0
NbC25818478g0001.1	377	364	350	933	817	686	562	278
NbC25818478g0005.1	180	231	283	455	279	299	307	138
NbC25818722g0001.1	0	1	0	0	0	0	0	0
NbC25818888g0001.1	0	0	0	0	0	0	0	0
NbC25824677g0001.1	0	0	0	0	0	0	0	0
NbC25824803g0003.1	31	30	35	72	40	56	43	12
NbC25825319g0002.1	186	221	212	372	325	327	263	128
NbC25826321g0003.1	43	37	55	105	81	73	74	30
NbC25830002g0001.1	0	2	1	1	1	2	0	0
NbC25835223g0004.1	196	247	240	401	410	331	272	180
NbC25835301g0002.1	0	0	0	0	0	0	0	0
NbC25835301g0003.1	0	0	0	0	0	0	0	0
NbC25835968g0001.1	2318	1406	492	1634	1832	2096	651	1159
NbC25835994g0001.1	36	29	27	53	34	34	33	10
NbC25836132g0001.1	253	232	269	413	465	383	388	182
NbC25837007g0001.1	0	0	0	0	0	0	0	0
NbC25839744g0001.1	0	0	0	2	0	3	1	0
NbC25839966g0002.1	0	0	0	1	0	0	0	0
NbC25839966g0004.1	226	181	196	435	394	365	232	197
NbC25840944g0001.1	0	0	0	0	0	0	0	0
NbC25841022g0004.1	155	160	262	433	338	298	325	122
NbC25841054g0001.1	0	0	0	0	0	0	0	0
NbC25841054g0002.1	0	0	0	0	0	0	0	0
NbC25842293g0001.1	25	23	39	59	29	47	57	22
NbC25843329g0001.1	0	0	0	0	0	0	0	0
NbC25843673g0001.1	0	0	0	0	0	0	0	0
NbC25844436g0001.1	0	0	0	0	0	0	2	0
NbC25844668g0001.1	0	0	0	0	0	0	0	0
NbC25844668g0002.1	0	0	0	0	0	0	0	0
NbC25845156g0001.1	6	5	4	11	11	4	6	5
NbC25845186g0001.1	1	1	1	1	0	1	0	0
NbC25845915g0002.1	14	11	28	50	24	25	12	6
NbC25846611g0001.1	0	0	0	0	0	0	0	0
NbC25849461g0001.1	0	0	0	1	2	0	1	0
NbC25850686g0003.1	6	11	20	26	12	18	22	8
NbC25852378g0001.1	0	0	0	0	0	0	0	0
NbC25854073g0001.1	0	0	0	0	0	0	0	0
NbC25855799g0001.1	18	22	16	29	13	8	0	2
NbC25857389g0001.1	0	0	0	0	0	0	0	0
NbC25857777g0001.1	8	6	7	18	20	19	1	8
NbC25859119g0004.1	41	39	48	58	50	36	46	13
NbC25860269g0002.1	0	0	0	0	0	0	1	0
NbC25860923g0002.1	0	0	0	0	0	0	0	0
NbC25862411g0001.1	5	3	1	2	3	3	7	0
NbC25862411g0002.1	0	0	0	0	0	0	0	0
NbC25862805g0001.1	0	0	0	0	0	0	0	0
NbC25865732g0001.1	6	3	3	17	10	12	7	4
NbC25866454g0002.1	1	0	0	2	2	4	0	1
NbC25866576g0001.1	8	9	4	21	18	9	7	4
NbC25866576g0005.1	48	44	60	104	92	82	73	36
NbC25866678g0001.1	16	16	19	41	37	31	32	12
NbC25867533g0001.1	132	162	68	229	147	186	109	99
NbC25868771g0001.1	30	16	31	62	57	48	30	13
NbC25870489g0002.1	77	77	110	207	132	120	145	69
NbC25870759g0002.1	1	4	1	12	11	7	3	2
NbC25870929g0001.1	34	32	34	90	67	64	51	17
NbC25872399g0003.1	48	43	20	65	75	64	105	58
NbC25873455g0003.1	0	0	0	3	10	15	23	9
NbC25874346g0004.1	1	2	5	6	5	1	1	0
NbC25874502g0003.1	11	14	20	29	19	24	24	8
NbC25875444g0004.1	0	0	0	0	0	0	0	0
NbC25881068g0003.1	1227	986	1043	2330	2001	1821	1600	830
NbC25883362g0001.1	3	4	5	14	19	12	8	7
NbC25883578g0003.1	67	70	57	127	98	102	86	53
NbC25886763g0004.1	0	0	0	0	0	0	0	0
NbC25888885g0004.1	0	0	0	0	0	0	0	0
NbC25888907g0001.1	5	5	3	11	9	8	5	2
NbC25888907g0002.1	113	114	107	201	226	167	108	65
NbC25891499g0001.1	5	4	21	27	17	27	12	4
NbC25891975g0003.1	66	71	106	165	150	178	112	75
NbC25892755g0001.1	525	436	725	1129	1311	1220	1172	744
NbC25895973g0001.1	0	0	0	0	0	0	0	0
NbC25898041g0001.1	0	0	1	0	1	1	2	0
NbC25899701g0001.1	3	0	1	1	1	4	1	1
NbC25899735g0001.1	0	0	0	0	0	0	0	0
NbC25900769g0001.1	0	0	0	0	0	0	0	0
NbC25903251g0001.1	18	23	14	42	30	37	22	16
NbC25903803g0002.1	28	29	30	41	25	44	25	19
NbC25903955g0002.1	1	0	2	3	2	11	5	4
NbC25904295g0003.1	1857	2114	992	2318	1615	1622	1075	733
NbC25904295g0005.1	112	142	168	294	240	251	205	110
NbC25904657g0001.1	6	12	11	21	13	8	8	4
NbC25905601g0003.1	0	0	0	0	0	0	0	0
NbC25907003g0004.1	4	0	6	6	3	0	0	4
NbC25910930g0002.1	1	0	0	1	1	0	3	1
NbC25913064g0003.1	3	0	2	6	4	4	1	0
NbC25914134g0001.1	0	0	0	0	0	2	0	0
NbC25914434g0001.1	0	0	0	2	1	0	0	0
NbC25915270g0001.1	18	27	27	40	32	27	38	29
NbC25915366g0003.1	3	4	5	0	17	1	6	0
NbC25915643g0001.1	6	2	8	7	4	5	3	2
NbC25916617g0003.1	37	32	43	63	78	56	62	21
NbC25918271g0003.1	0	0	0	0	0	0	0	0
NbC25918387g0004.1	7	5	7	17	8	13	9	12
NbC25918569g0001.1	0	0	0	0	0	0	0	0
NbC25918569g0002.1	0	0	0	0	0	0	0	0
NbC25921396g0004.1	0	0	0	1	0	1	0	0
NbC25922648g0001.1	0	0	0	0	0	0	0	0
NbC25923596g0003.1	0	0	0	0	0	0	0	0
NbC25923856g0004.1	189	196	191	339	304	295	284	122
NbC25927875g0001.1	0	0	0	0	0	0	0	0
NbC25928883g0001.1	72	70	77	134	117	110	130	49
NbC25928981g0004.1	11	7	13	21	22	15	24	11
NbC25931037g0004.1	0	0	0	0	0	0	0	0
NbC25934922g0002.1	0	0	0	0	0	0	0	0
NbC25936038g0001.1	0	0	0	0	0	1	0	0
NbC25940621g0002.1	22	29	33	96	74	63	49	38
NbC25943585g0004.1	3	7	5	8	4	5	6	5
NbC25945221g0002.1	0	0	0	0	1	0	0	0
NbC25946057g0001.1	4	0	3	8	3	11	3	6
NbC25948175g0003.1	3	5	3	0	7	3	11	2
NbC25948449g0001.1	0	0	0	0	0	0	0	0
NbC25948571g0004.1	38	37	24	87	77	70	42	37
NbC25948687g0003.1	18	21	48	136	233	195	71	99
NbC25950162g0003.1	0	0	0	0	0	0	0	0
NbC25950798g0005.1	55	61	33	133	103	81	44	30
NbC25950894g0003.1	0	0	0	0	0	0	0	0
NbC25951858g0002.1	14	23	40	54	22	34	24	15
NbC25952682g0002.1	0	0	0	0	0	0	0	0
NbC25954452g0001.1	0	0	0	0	0	0	0	0
NbC25954870g0001.1	0	0	0	0	0	0	0	0
NbC25957072g0001.1	0	0	0	0	0	1	0	0
NbC25957502g0004.1	0	0	0	0	0	0	0	0
NbC25957760g0002.1	0	0	0	0	0	0	0	0
NbC25960916g0003.1	8	8	3	17	30	16	3	6
NbC25961541g0004.1	67	55	89	135	130	89	80	47
NbC25963383g0003.1	24	29	56	72	82	59	40	24
NbC25964675g0004.1	2443	2181	1903	5183	3620	3856	3037	1925
NbC25965200g0001.1	15	16	10	41	37	23	19	15
NbC25965424g0004.1	0	0	0	0	1	0	0	0
NbC25975958g0001.1	0	0	0	0	0	0	0	0
NbC25977882g0003.1	19	17	15	39	24	25	28	16
NbC25978713g0001.1	0	0	0	0	0	0	0	0
NbC25983181g0002.1	0	2	2	0	0	0	0	0
NbC25983181g0004.1	0	0	0	0	0	0	0	0
NbC25985183g0003.1	48	71	75	165	113	98	76	37
NbC25985483g0001.1	0	0	0	0	0	0	0	0
NbC25988716g0001.1	0	4	7	5	2	4	5	1
NbC25988716g0002.1	2	6	10	8	13	12	4	1
NbC25991670g0003.1	95	99	113	180	190	132	76	40
NbC25992544g0004.1	5	13	10	19	8	3	1	3
NbC25993082g0001.1	14	16	15	34	29	16	31	7
NbC25993797g0001.1	2	4	10	13	18	9	4	2
NbC25995009g0001.1	108	90	70	87	105	65	107	49
NbC25995345g0001.1	1	0	1	1	0	2	1	0
NbC25995787g0001.1	0	0	0	0	0	5	1	0
NbC26002859g0001.1	51	45	57	63	57	71	80	48
NbC26003603g0002.1	22	36	55	137	76	92	82	26
NbC26005274g0001.1	2	3	2	4	0	7	1	1
NbC26007970g0001.1	0	0	0	0	0	0	0	0
NbC26011445g0001.1	0	0	0	0	0	0	0	0
NbC26012202g0003.1	58	44	68	94	94	100	102	40
NbC26012810g0004.1	29	32	22	80	43	47	45	21
NbC26013506g0003.1	53	52	102	125	132	71	105	35
NbC26018418g0003.1	37	38	44	92	36	68	41	14
NbC26018770g0003.1	156	151	205	307	244	163	230	62
NbC26020720g0002.1	41	33	57	94	85	68	70	11
NbC26021894g0001.1	18	18	20	44	17	40	30	15
NbC26022389g0004.1	0	0	0	0	0	0	0	0
NbC26022933g0001.1	0	0	0	0	0	0	0	0
NbC26022979g0001.1	2	2	2	5	5	5	2	1
NbC26023144g0002.1	73	103	69	204	101	147	41	16
NbC26024296g0001.1	0	0	0	0	0	0	0	0
NbC26024773g0001.1	0	0	0	0	1	0	0	0
NbC26024791g0001.1	16	18	21	18	23	21	17	9
NbC26024791g0002.1	7	2	9	9	18	6	13	1
NbC26026417g0001.1	0	0	0	0	0	0	0	0
NbC26027233g0001.1	0	0	0	0	0	0	0	0
NbC26027469g0001.1	131	143	172	316	315	233	247	121
NbC26028711g0002.1	72	73	125	210	140	131	166	61
NbC26031181g0003.1	0	0	0	1	1	0	2	0
NbC26031239g0001.1	0	0	0	0	0	0	0	0
NbC26032575g0001.1	16	16	33	39	45	37	28	18
NbC26034551g0004.1	76	68	65	124	80	90	95	45
NbC26035087g0001.1	6	4	5	11	6	9	10	3
NbC26041616g0001.1	196	195	386	527	402	379	416	161
NbC26043054g0003.1	508	518	520	1051	776	787	664	392
NbC26045227g0004.1	0	0	0	0	0	0	1	0
NbC26045525g0001.1	0	1	2	2	0	2	1	0
NbC26046735g0005.1	27	28	30	49	42	54	46	23
NbC26046791g0001.1	0	0	0	0	0	0	0	0
NbC26048890g0003.1	21	16	31	52	34	24	34	17
NbC26049846g0003.1	85	94	78	139	78	88	107	57
NbC26052641g0001.1	96	120	248	402	382	302	281	125
NbC26053601g0004.1	4388	4334	2852	7721	4870	4210	5169	1816
NbC26054463g0002.1	0	0	0	0	0	0	0	0
NbC26054509g0001.1	0	1	0	3	2	4	0	0
NbC26055089g0004.1	19	14	50	84	73	51	63	20
NbC26055767g0002.1	3	6	0	3	8	3	0	0
NbC26057631g0003.1	55	73	66	129	113	140	74	50
NbC26058683g0001.1	244	248	228	483	513	407	422	245
NbC26060097g0002.1	4	3	3	11	10	10	7	2
NbC26061039g0004.1	14	13	50	59	63	65	29	15
NbC26061039g0005.1	1	1	3	7	1	7	2	0
NbC26062811g0002.1	102	113	105	196	133	130	108	53
NbC26064567g0001.1	0	1	0	0	0	1	0	0
NbC26065859g0001.1	0	0	0	0	0	0	0	0
NbC26066788g0001.1	0	0	1	1	0	0	0	0
NbC26066788g0004.1	0	0	1	2	1	1	2	1
NbC26067292g0002.1	0	0	0	0	0	0	0	0
NbC26067334g0003.1	0	0	0	0	0	0	0	0
NbC26067722g0001.1	0	0	0	0	0	0	0	0
NbC26068038g0004.1	0	0	0	0	0	0	0	0
NbC26069720g0001.1	249	254	181	541	409	501	329	274
NbC26070204g0004.1	0	0	0	0	0	0	0	0
NbC26073398g0001.1	158	151	167	322	306	273	345	186
NbC26073808g0002.1	0	0	2	2	0	2	1	0
NbC26074276g0004.1	21	27	53	81	73	70	59	26
NbC26075452g0001.1	34	43	16	43	34	40	14	14
NbC26077604g0003.1	260	285	292	410	384	555	453	263
NbC26078426g0003.1	134	114	118	253	303	279	211	122
NbC26078486g0002.1	6	8	6	8	24	32	28	13
NbC26078908g0001.1	0	0	0	0	0	0	0	0
NbC26082210g0001.1	41	28	22	47	45	58	38	19
NbC26082683g0001.1	0	0	0	0	2	1	1	0
NbC26083281g0003.1	17	16	14	29	18	11	23	10
NbC26085333g0001.1	0	2	0	2	8	2	0	0
NbC26086107g0001.1	6	11	17	11	12	10	12	9
NbC26086523g0001.1	0	0	0	0	0	0	0	0
NbC26092387g0003.1	0	0	0	0	1	0	0	0
NbC26094760g0005.1	20	11	11	36	21	19	29	5
NbC26095992g0004.1	43	44	48	116	107	86	66	33
NbC26098471g0005.1	4	5	6	12	15	13	11	7
NbC26098743g0003.1	350	311	305	710	472	525	441	279
NbC26100015g0001.1	845	879	1047	1161	1790	904	1189	328
NbC26100015g0005.1	2	0	1	2	0	1	2	0
NbC26100303g0004.1	1	0	0	0	2	0	0	0
NbC26100965g0001.1	2	0	0	2	0	0	1	1
NbC26104776g0001.1	74	72	53	162	84	126	63	37
NbC26106323g0003.1	43	64	93	173	132	138	93	61
NbC26108385g0002.1	0	0	0	0	0	0	0	0
NbC26108591g0001.1	98	76	119	217	171	164	181	93
NbC26109045g0003.1	22	15	25	31	35	29	18	6
NbC26110023g0004.1	0	0	0	0	0	0	0	0
NbC26110323g0001.1	0	0	0	0	0	0	0	0
NbC26111187g0004.1	0	0	0	0	0	1	2	0
NbC26112781g0001.1	0	0	0	0	0	0	0	0
NbC26113881g0001.1	115	108	178	309	229	177	318	149
NbC26114677g0005.1	0	0	1	0	0	1	0	1
NbC26114925g0002.1	48	55	42	136	98	95	109	42
NbC26114925g0005.1	77	119	131	250	188	182	93	40
NbC26114999g0001.1	45	32	47	98	81	60	64	24
NbC26115705g0001.1	0	0	0	0	0	0	0	0
NbC26121466g0003.1	382	423	403	829	620	612	349	185
NbC26121602g0003.1	13	19	32	63	34	55	36	16
NbC26121602g0005.1	64	48	26	119	111	91	64	45
NbC26122552g0003.1	223	236	419	732	602	492	541	201
NbC26123882g0001.1	0	0	0	0	0	0	0	0
NbC26124128g0002.1	0	1	0	2	1	1	0	1
NbC26126792g0003.1	0	0	0	0	0	0	0	0
NbC26126792g0004.1	0	0	0	0	0	0	0	0
NbC26128793g0002.1	21	43	41	82	77	109	69	59
NbC26128803g0001.1	7	5	10	20	6	7	12	4
NbC26129329g0001.1	81	65	36	143	52	64	53	19
NbC26129345g0003.1	20	16	22	40	33	22	17	9
NbC26129757g0002.1	1	1	0	3	3	1	0	0
NbC26129757g0005.1	48	62	121	159	145	155	67	36
NbC26133540g0004.1	3	4	0	2	0	0	2	0
NbC26135290g0002.1	84	77	96	186	164	160	123	62
NbC26139093g0003.1	60	44	54	124	105	83	63	28
NbC26141562g0002.1	28	22	16	62	54	42	27	15
NbC26142430g0001.1	12	11	15	20	16	16	25	11
NbC26142923g0005.1	18	27	31	42	45	29	30	15
NbC26143295g0001.1	143	124	165	319	276	268	265	138
NbC26143309g0002.1	13	13	8	27	36	16	11	10
NbC26143351g0001.1	0	0	0	0	0	0	0	0
NbC26143351g0003.1	29	49	43	80	65	50	46	24
NbC26143923g0005.1	24	22	45	71	202	179	202	64
NbC26144103g0001.1	43	49	35	134	93	94	59	36
NbC26144735g0003.1	16	16	20	30	25	56	31	16
NbC26147274g0001.1	0	0	0	0	0	0	0	0
NbC26147720g0004.1	62	73	62	131	115	129	91	39
NbC26149360g0001.1	1	0	0	0	0	0	0	0
NbC26152230g0001.1	128	127	169	269	228	222	262	102
NbC26152828g0003.1	0	1	0	1	2	1	0	0
NbC26154970g0001.1	0	0	0	0	0	0	0	0
NbC26154970g0002.1	28	23	28	34	103	59	34	25
NbC26154970g0003.1	0	0	0	0	0	0	0	0
NbC26154970g0005.1	13	10	6	13	23	21	4	8
NbC26155340g0004.1	337	335	400	630	614	431	595	256
NbC26159273g0001.1	0	0	0	0	0	0	0	0
NbC26159273g0002.1	0	0	0	0	0	1	0	0
NbC26164527g0004.1	286	224	305	517	540	492	405	174
NbC26167358g0001.1	106	103	121	222	181	212	213	107
NbC26167850g0001.1	14	9	9	37	20	15	6	2
NbC26168452g0003.1	32	32	23	33	38	38	28	3
NbC26169099g0006.1	1	1	4	2	0	1	0	2
NbC26170789g0001.1	0	0	0	0	0	0	0	0
NbC26170893g0001.1	0	0	0	0	0	0	0	0
NbC26171019g0001.1	0	0	0	2	1	0	0	0
NbC26171849g0001.1	4	7	3	17	8	9	8	2
NbC26171849g0006.1	183	194	159	358	263	239	241	120
NbC26172235g0003.1	12	14	23	45	32	34	26	15
NbC26172507g0002.1	70	77	96	160	141	165	111	53
NbC26175761g0001.1	7	5	17	40	18	19	4	3
NbC26176493g0003.1	398	516	612	879	744	1143	384	278
NbC26176503g0002.1	0	0	0	0	0	0	0	0
NbC26177011g0001.1	58	52	68	121	101	113	101	47
NbC26177985g0004.1	48	44	40	112	95	102	71	51
NbC26179326g0005.1	41	30	40	52	52	43	55	23
NbC26180034g0001.1	0	0	0	0	0	0	0	0
NbC26185607g0001.1	1	0	0	0	0	0	0	0
NbC26186313g0001.1	27	33	67	81	141	100	37	21
NbC26186655g0003.1	47	44	55	116	87	90	66	41
NbC26187501g0004.1	13	9	16	26	15	25	18	6
NbC26187909g0002.1	151	117	239	424	303	362	248	102
NbC26188271g0001.1	0	0	0	0	0	0	0	0
NbC26194291g0001.1	0	0	0	0	0	0	0	0
NbC26195568g0003.1	0	0	0	0	0	0	0	0
NbC26195568g0004.1	68	77	109	194	164	138	125	46
NbC26197159g0003.1	20	19	20	53	47	37	20	10
NbC26197159g0004.1	14	12	14	22	26	23	15	8
NbC26199301g0001.1	0	0	0	0	0	0	0	0
NbC26206213g0004.1	267	301	265	461	280	354	365	190
NbC26207102g0001.1	27	30	40	73	62	46	31	20
NbC26207102g0002.1	0	0	0	0	0	0	0	0
NbC26208175g0003.1	1261	1548	1549	3020	2086	2617	2701	1213
NbC26210069g0005.1	118	151	194	363	329	262	203	115
NbC26210937g0001.1	2	6	2	8	12	4	7	3
NbC26212137g0001.1	20	11	13	33	13	20	15	3
NbC26213611g0002.1	17	24	22	41	26	31	49	40
NbC26213851g0001.1	0	0	0	0	0	0	0	0
NbC26213959g0004.1	200	221	181	198	250	267	262	130
NbC26213959g0006.1	0	1	0	3	1	0	0	0
NbC26215295g0003.1	146	95	190	289	280	257	204	96
NbC26216047g0001.1	0	0	0	0	0	0	0	0
NbC26216047g0002.1	0	0	0	0	0	0	0	0
NbC26216471g0004.1	127	109	138	264	217	187	183	91
NbC26217469g0003.1	0	0	1	1	0	1	0	0
NbC26217950g0002.1	0	0	0	0	0	0	0	0
NbC26217950g0003.1	0	0	0	0	0	0	0	0
NbC26218756g0001.1	0	0	0	0	0	0	0	0
NbC26218984g0001.1	0	0	0	0	0	0	0	0
NbC26224113g0001.1	0	0	0	0	0	0	0	0
NbC26225559g0001.1	0	0	0	0	0	0	0	0
NbC26228280g0003.1	50	56	72	94	68	67	78	38
NbC26229140g0003.1	0	0	0	0	0	0	0	0
NbC26229648g0001.1	746	801	670	1203	868	852	824	379
NbC26231442g0001.1	22	34	31	76	66	60	65	25
NbC26231597g0001.1	0	0	0	0	0	0	0	0
NbC26232797g0001.1	8785	6275	4821	106	9515	287	5919	31
NbC26239400g0001.1	0	0	0	0	0	0	0	0
NbC26239400g0003.1	0	0	0	0	0	0	0	0
NbC26240417g0001.1	0	0	0	0	0	0	0	0
NbC26240605g0002.1	148	137	145	309	239	269	187	126
NbC26241325g0002.1	0	0	0	0	0	1	0	1
NbC26241325g0004.1	2	2	0	1	0	0	1	0
NbC26242373g0001.1	1	2	0	0	0	2	0	0
NbC26242571g0003.1	528	368	454	817	793	642	671	280
NbC26245065g0001.1	2	1	2	1	1	2	4	2
NbC26245065g0002.1	0	2	3	2	2	3	2	3
NbC26247160g0003.1	555	563	557	1195	729	953	683	452
NbC26247160g0004.1	91	92	132	237	179	217	166	78
NbC26248078g0002.1	1	1	3	1	1	3	1	6
NbC26249828g0002.1	0	0	1	0	0	0	0	0
NbC26249828g0004.1	2	3	0	2	3	7	4	0
NbC26252415g0001.1	2219	1910	1845	4463	3273	3835	2954	1886
NbC26252415g0003.1	0	0	0	0	2	0	0	0
NbC26253945g0001.1	57	55	78	123	82	75	89	27
NbC26254939g0002.1	0	0	0	0	0	0	0	0
NbC26259638g0001.1	0	0	0	0	0	0	0	0
NbC26259638g0002.1	0	0	0	0	1	0	0	0
NbC26261143g0004.1	0	0	0	0	0	0	0	0
NbC26261143g0005.1	0	0	0	0	0	0	0	0
NbC26261923g0003.1	885	783	811	2004	1567	1556	1537	815
NbC26263860g0005.1	0	0	0	0	0	0	0	0
NbC26263860g0006.1	0	0	0	0	0	0	0	0
NbC26264841g0001.1	549	598	799	1176	1059	1219	1045	586
NbC26264961g0003.1	0	0	0	0	0	0	0	0
NbC26265174g0001.1	1	1	11	5	8	7	8	2
NbC26265174g0004.1	22	17	30	58	62	51	32	19
NbC26266782g0001.1	9	13	20	27	22	19	9	3
NbC26268318g0001.1	2	16	3	13	9	15	15	6
NbC26273242g0002.1	6	17	18	38	38	39	19	4
NbC26275936g0004.1	62	89	106	184	122	136	116	62
NbC26279043g0001.1	4	3	3	7	10	11	6	12
NbC26279584g0006.1	53	59	64	146	124	120	96	57
NbC26279584g0007.1	2	2	5	5	2	4	4	3
NbC26279584g0008.1	0	0	0	0	0	0	0	0
NbC26279724g0002.1	0	0	0	0	0	0	0	0
NbC26281995g0002.1	0	0	0	0	0	0	0	0
NbC26282023g0004.1	290	339	381	623	472	551	459	295
NbC26282561g0002.1	0	0	0	0	0	0	0	0
NbC26284378g0001.1	0	0	0	0	0	0	0	0
NbC26288570g0002.1	19	18	30	28	24	32	24	14
NbC26289840g0001.1	0	0	0	0	0	0	0	0
NbC26290280g0005.1	83	79	132	227	100	91	320	110
NbC26293446g0001.1	0	0	0	1	0	1	0	1
NbC26296682g0001.1	0	0	0	0	0	0	0	0
NbC26298068g0003.1	49	47	35	75	91	62	239	107
NbC26298370g0001.1	20	15	28	42	56	35	27	12
NbC26300154g0004.1	90	101	181	326	228	183	181	69
NbC26301229g0003.1	35	41	36	73	55	72	36	16
NbC26303306g0002.1	0	2	0	0	1	1	1	0
NbC26304892g0001.1	85	121	95	160	106	99	137	63
NbC26305628g0005.1	3183	3374	3128	5644	3996	5388	5193	2754
NbC26305628g0009.1	156	154	225	401	298	268	254	95
NbC26308818g0001.1	0	0	0	0	0	0	0	0
NbC26309559g0001.1	0	0	0	0	0	0	0	0
NbC26310601g0005.1	0	1	0	2	1	5	0	0
NbC26310601g0006.1	2	1	1	3	2	8	0	1
NbC26311172g0004.1	2	0	0	0	1	1	0	0
NbC26314676g0001.1	0	0	0	0	0	0	0	0
NbC26316418g0002.1	0	0	1	0	0	0	1	0
NbC26316418g0006.1	0	0	0	0	0	0	1	0
NbC26316418g0007.1	0	0	0	0	0	0	0	0
NbC26317384g0001.1	0	0	0	0	0	0	1	0
NbC26322598g0002.1	0	0	0	0	0	0	0	0
NbC26323212g0001.1	0	0	0	0	0	0	0	0
NbC26324866g0002.1	0	0	0	0	0	0	0	0
NbC26324866g0003.1	0	0	0	0	0	0	0	0
NbC26325369g0001.1	0	0	0	0	0	0	0	0
NbC26326941g0001.1	0	0	0	0	0	0	0	0
NbC26327867g0002.1	0	0	0	0	0	0	0	0
NbC26332048g0002.1	0	0	0	0	0	0	0	0
NbC26332048g0003.1	0	0	0	0	0	0	0	0
NbC26332476g0002.1	0	0	0	0	0	0	0	0
NbC26332476g0003.1	0	0	0	0	0	0	0	0
NbC26334013g0004.1	71	91	203	292	302	231	208	96
NbS00000001g0008.1	0	0	0	1	0	0	0	0
NbS00000001g0012.1	0	0	0	0	1	1	2	0
NbS00000001g0013.1	334	297	317	582	477	358	458	211
NbS00000002g0003.1	104	110	100	149	142	119	93	52
[truncated: 74,380 more rows]

## Sheet: S. prinophyllum
geneid	MVM1	MVM2	TM1	TM2	FM1	FM2	SIM1	SIM2
Sprino_c25091_g1_i11|m.38617	98	140	137	103	144	108	124	98
Sprino_c22252_g1_i5|m.18124	468	554	697	631	662	665	539	466
Sprino_c26539_g3_i10|m.62364	648	699	760	665	716	693	666	562
Sprino_c26851_g4_i1|m.70303	0	1	5	3	1	6	4	2
Sprino_c25300_g2_i2|m.41201	215	263	283	206	242	189	272	164
Sprino_c55851_g1_i1|m.123785	3	5	2	2	1	3	3	2
Sprino_c22821_g1_i2|m.20784	30	40	54	47	53	49	40	37
Sprino_c24984_g1_i2|m.37485	312	380	391	353	436	440	295	260
Sprino_c28710_g7_i6|m.112487	1235	1523	1791	1573	1703	1600	1291	1248
Sprino_c2224_g1_i1|m.498	28	30	40	31	35	31	28	20
Sprino_c2746_g1_i2|m.540	12	24	30	9	7	7	13	9
Sprino_c26992_g12_i2|m.73463	200	265	294	245	349	333	211	157
Sprino_c27033_g6_i1|m.74501	2697	3497	3376	3140	3655	3163	2528	2027
Sprino_c28456_g3_i3|m.107101	1	1	3	0	2	2	1	0
Sprino_c27047_g6_i1|m.74863	3	5	4	7	5	5	1	5
Sprino_c27848_g13_i9|m.93890	774	1091	1100	919	1285	1226	762	630
Sprino_c26670_g4_i7|m.65427	4	4	12	15	2	7	10	10
Sprino_c25124_g3_i7|m.38989	134	190	231	206	206	219	166	149
Sprino_c13677_g1_i4|m.3191	0	0	4	3	0	0	1	2
Sprino_c26992_g12_i2|m.73466	0	0	0	0	0	0	1	0
Sprino_c26992_g1_i4|m.73434	6	7	19	12	25	17	20	14
Sprino_c26690_g1_i4|m.65821	180	204	239	190	216	158	157	152
Sprino_c26670_g4_i7|m.65429	0	3	1	1	1	3	0	0
Sprino_c25945_g2_i6|m.50314	65	94	113	114	95	86	81	58
Sprino_c26625_g1_i1|m.64275	53	57	74	47	57	55	64	54
Sprino_c28292_g2_i4|m.103759	56	73	73	95	67	66	54	47
Sprino_c23689_g1_i3|m.26152	263	380	388	332	462	396	297	239
Sprino_c23003_g1_i1|m.21878	233	246	311	229	322	289	229	211
Sprino_c27912_g1_i6|m.95211	14	21	51	32	19	21	39	22
Sprino_c37713_g1_i1|m.122073	1	0	1	1	2	3	0	1
Sprino_c27222_g6_i1|m.78634	60	63	51	50	28	44	59	58
Sprino_c23689_g1_i3|m.26153	29	26	33	25	43	41	32	31
Sprino_c23206_g1_i2|m.23109	110	125	173	146	166	174	174	149
Sprino_c27319_g4_i10|m.81283	22	23	47	31	48	34	36	30
Sprino_c28409_g2_i8|m.106177	62	66	83	74	87	72	72	67
Sprino_c22729_g1_i1|m.20284	268	332	221	209	210	160	112	108
Sprino_c28268_g1_i4|m.103268	3777	4546	4921	3933	5660	5037	3211	2873
Sprino_c10779_g1_i1|m.2333	1	4	3	0	2	0	0	0
Sprino_c27029_g1_i10|m.74420	96	114	134	107	112	105	102	102
Sprino_c23945_g1_i3|m.28015	57	97	79	74	39	54	47	31
Sprino_c26916_g4_i2|m.71817	2886	3455	3579	3196	3862	4111	2319	2291
Sprino_c22807_g1_i6|m.20737	36	40	57	37	78	89	50	39
Sprino_c26361_g3_i8|m.58292	143	190	165	147	91	107	94	86
Sprino_c25351_g1_i7|m.41741	263	321	247	243	237	250	197	189
Sprino_c27893_g3_i9|m.94830	1276	1670	1638	1486	2063	2032	1090	1095
Sprino_c26719_g1_i4|m.66660	11	11	16	15	20	7	11	9
Sprino_c27617_g1_i18|m.88326	213	240	228	203	246	248	174	142
Sprino_c26848_g1_i11|m.70168	243	254	651	658	469	488	526	527
Sprino_c22442_g1_i1|m.19101	17	12	25	20	13	13	45	34
Sprino_c21902_g1_i5|m.16556	81	344	64	35	156	642	304	147
Sprino_c27862_g10_i3|m.94249	27	46	56	40	44	40	27	24
Sprino_c26848_g1_i11|m.70169	60	72	85	52	79	61	78	35
Sprino_c25351_g1_i7|m.41743	14	20	23	18	13	18	16	11
Sprino_c26618_g2_i1|m.64093	142	187	241	215	213	182	204	141
Sprino_c26551_g1_i11|m.62601	133	188	238	188	241	193	162	147
Sprino_c28987_g19_i1|m.117605	226	251	435	384	300	282	230	220
Sprino_c26281_g1_i8|m.56945	734	1011	1053	879	1085	1060	657	550
Sprino_c16487_g1_i2|m.5628	1	0	0	1	0	1	1	2
Sprino_c25586_g8_i2|m.44842	1440	1692	1936	1693	2040	1687	1415	1215
Sprino_c25206_g1_i6|m.40090	26	32	16	31	23	17	34	26
Sprino_c28345_g1_i3|m.104952	190	221	260	193	286	303	240	193
Sprino_c26252_g1_i3|m.56344	2245	3160	3576	3312	3321	3455	2654	2416
Sprino_c28480_g3_i19|m.107712	319	391	422	366	417	375	318	339
Sprino_c28191_g5_i18|m.101632	1302	1717	1906	1841	1925	1876	1567	1453
Sprino_c28113_g5_i1|m.99808	67	99	101	74	82	73	110	91
Sprino_c26252_g1_i3|m.56345	181	336	335	302	290	293	225	214
Sprino_c27818_g11_i4|m.93127	105	185	164	134	176	161	94	93
Sprino_c28345_g1_i3|m.104954	24	35	29	18	34	44	19	23
Sprino_c27147_g2_i9|m.76948	18	14	22	12	19	22	20	12
Sprino_c28662_g1_i15|m.111576	5	5	5	3	5	4	4	4
Sprino_c28673_g2_i20|m.111879	351	397	434	363	484	366	338	234
Sprino_c28248_g9_i1|m.102807	578	770	507	453	472	464	279	245
Sprino_c13807_g1_i2|m.3342	16	23	18	20	28	26	10	8
Sprino_c45084_g1_i1|m.122699	0	0	0	0	1	1	0	0
Sprino_c26932_g7_i2|m.72266	551	661	728	573	273	248	341	342
Sprino_c26918_g1_i16|m.71871	5	10	5	9	14	20	9	8
Sprino_c24743_g1_i4|m.34938	3309	4014	4423	3898	5129	5001	3005	2646
Sprino_c25685_g2_i8|m.45997	31	25	32	26	30	35	32	19
Sprino_c26596_g1_i6|m.63613	203	221	285	226	291	214	250	173
Sprino_c22462_g2_i1|m.19178	434	519	517	476	573	553	401	349
Sprino_c24463_g2_i4|m.32193	304	391	411	367	524	400	282	249
Sprino_c21832_g1_i2|m.16228	23	28	71	28	30	27	47	41
Sprino_c26785_g3_i11|m.68423	23	28	46	34	39	37	45	21
Sprino_c20731_g1_i1|m.12566	50	49	70	52	77	61	72	48
Sprino_c15170_g1_i1|m.4560	5	5	5	4	2	1	0	1
Sprino_c27736_g8_i4|m.91132	636	776	934	803	945	797	634	533
Sprino_c26398_g2_i4|m.59108	529	604	695	602	652	610	477	385
Sprino_c27273_g16_i4|m.80042	19	27	12	22	30	12	22	14
Sprino_c24959_g1_i5|m.37315	41	32	47	37	60	66	37	25
Sprino_c25305_g1_i4|m.41254	340	341	328	305	188	219	286	275
Sprino_c63152_g1_i1|m.124379	6	4	3	3	0	2	0	1
Sprino_c27148_g2_i6|m.76973	0	1	0	2	0	1	4	1
Sprino_c27247_g10_i7|m.79321	0	0	0	0	1	0	0	0
Sprino_c14439_g1_i1|m.4159	64	64	46	53	45	38	51	37
Sprino_c18342_g1_i3|m.7411	5	13	11	4	2	8	4	6
Sprino_c24874_g1_i11|m.36314	186	192	208	176	227	218	199	157
Sprino_c25907_g1_i1|m.49494	2001	2838	3026	2771	2826	2971	2254	1875
Sprino_c21978_g3_i2|m.16915	84	106	124	78	93	70	86	75
Sprino_c24784_g1_i7|m.35335	199	242	260	219	206	220	250	215
Sprino_c25219_g1_i1|m.40208	9	13	16	15	16	13	18	15
Sprino_c26319_g18_i1|m.57567	443	522	378	404	740	586	214	178
Sprino_c28094_g15_i1|m.99449	3207	3839	3946	3560	3857	3886	2603	2402
Sprino_c26051_g1_i2|m.52460	857	950	766	583	2207	2168	700	486
Sprino_c24827_g1_i5|m.35777	41	58	49	53	17	17	12	13
Sprino_c18714_g2_i1|m.8031	5	7	96	51	52	49	175	165
Sprino_c26126_g3_i5|m.53726	321	390	392	329	291	292	284	221
Sprino_c16707_g1_i1|m.5766	1	3	5	5	2	4	2	3
Sprino_c28011_g4_i11|m.97563	1984	2490	2659	2388	2674	2506	2088	1799
Sprino_c25525_g1_i6|m.43965	507	719	744	662	747	756	572	416
Sprino_c38538_g1_i1|m.122254	528	539	571	556	508	393	361	289
Sprino_c24578_g1_i2|m.33314	265	364	417	309	421	338	260	199
Sprino_c26877_g1_i14|m.70880	422	437	599	459	562	551	434	333
Sprino_c22965_g1_i1|m.21628	824	1150	1228	1048	1296	986	979	829
Sprino_c23800_g2_i1|m.27000	6	3	8	6	7	7	5	6
Sprino_c27792_g5_i8|m.92571	205	209	278	209	293	287	196	192
Sprino_c26855_g4_i11|m.70438	284	370	419	384	428	392	327	301
Sprino_c27621_g1_i5|m.88412	118	155	175	120	169	124	92	87
Sprino_c25340_g1_i6|m.41629	84	128	145	139	126	108	94	97
Sprino_c20814_g2_i3|m.12816	889	1064	1003	912	948	812	656	570
Sprino_c22609_g1_i1|m.19837	221	271	322	252	327	390	240	244
Sprino_c25204_g1_i6|m.39989	53	60	78	51	61	58	48	37
Sprino_c24642_g2_i6|m.33879	100	121	146	126	167	112	116	98
Sprino_c25575_g10_i3|m.44622	648	783	930	783	897	776	716	566
Sprino_c20707_g2_i3|m.12490	265	309	376	313	377	384	306	239
Sprino_c25121_g2_i4|m.38943	28	36	35	35	37	38	53	52
Sprino_c19092_g1_i1|m.8860	3216	4078	4459	4090	4469	4110	3024	2703
Sprino_c25520_g2_i7|m.43824	235	264	333	234	316	276	213	173
Sprino_c23647_g1_i2|m.25863	86	82	126	93	154	140	105	65
Sprino_c26928_g5_i3|m.72095	82	108	100	106	78	82	91	76
Sprino_c26460_g4_i2|m.60663	1139	1223	1508	1242	1713	1438	1146	962
Sprino_c26928_g5_i3|m.72096	114	101	134	116	127	149	110	103
Sprino_c28272_g2_i1|m.103356	60	62	107	66	99	68	88	65
Sprino_c27268_g2_i2|m.79816	67	91	70	75	64	66	71	47
Sprino_c25691_g2_i4|m.46082	518	682	746	617	821	689	591	473
Sprino_c27762_g8_i8|m.91760	246	301	383	325	285	278	280	261
Sprino_c26319_g5_i1|m.57512	1291	1568	1740	1422	1579	1377	1290	1078
Sprino_c23982_g2_i2|m.28386	2342	3179	3231	2971	3149	3243	2422	2349
Sprino_c27731_g2_i9|m.90990	1	0	1	2	2	3	10	3
Sprino_c16133_g1_i1|m.5261	28	37	29	24	35	41	66	56
Sprino_c47965_g1_i1|m.123099	85	102	407	254	366	232	763	583
Sprino_c19211_g1_i1|m.9118	8	9	15	18	0	1	8	9
Sprino_c22874_g1_i5|m.21075	517	596	721	562	715	589	554	445
Sprino_c24922_g1_i5|m.36939	22	38	37	30	21	29	51	47
Sprino_c26009_g2_i2|m.51469	352	449	455	431	159	131	320	303
Sprino_c25376_g3_i6|m.42072	15	15	29	15	30	30	20	9
Sprino_c28378_g11_i2|m.105554	82	92	107	94	85	110	54	73
Sprino_c27631_g2_i1|m.88627	1070	1300	1455	1224	1881	1661	1049	965
Sprino_c22676_g5_i3|m.20067	555	692	675	618	624	726	531	439
Sprino_c28071_g4_i17|m.98918	311	367	257	228	87	106	484	365
Sprino_c26847_g8_i4|m.70108	444	458	577	500	612	560	438	322
Sprino_c26953_g3_i1|m.72678	2206	2512	3330	2782	3449	2877	3062	2374
Sprino_c26490_g4_i6|m.61211	52	53	78	46	71	40	51	47
Sprino_c26498_g19_i6|m.61525	1375	1496	1477	1506	1303	1293	1258	1020
Sprino_c23967_g1_i5|m.28267	52	54	50	50	78	63	48	33
Sprino_c19016_g2_i2|m.8711	467	488	573	494	587	454	467	339
Sprino_c25615_g1_i5|m.45164	11	13	10	12	13	15	17	6
Sprino_c21130_g1_i1|m.13804	44	50	70	58	98	96	59	43
Sprino_c23475_g1_i2|m.24679	340	388	485	422	425	391	423	392
Sprino_c25248_g1_i6|m.40573	94	111	90	95	64	83	57	54
Sprino_c28128_g8_i4|m.100209	119	140	184	145	153	181	152	98
Sprino_c28556_g13_i9|m.109478	408	438	524	484	602	563	369	358
Sprino_c27061_g4_i1|m.75186	164	174	262	149	299	249	198	147
Sprino_c25248_g1_i6|m.40574	161	208	245	195	260	252	147	142
Sprino_c64869_g1_i1|m.124598	4	2	3	4	11	9	5	4
Sprino_c25179_g1_i6|m.39609	21	37	23	17	28	26	14	12
Sprino_c28239_g5_i2|m.102630	627	849	932	721	851	772	600	480
Sprino_c25534_g1_i5|m.44068	152	191	229	223	176	164	283	252
Sprino_c25110_g2_i3|m.38821	991	1220	1501	1348	1474	1395	1231	1117
Sprino_c27033_g1_i2|m.74483	193	235	202	156	365	252	158	103
Sprino_c26286_g11_i3|m.57018	334	480	518	443	547	476	383	340
Sprino_c28334_g10_i3|m.104684	130	153	151	155	139	139	137	137
Sprino_c2402_g1_i1|m.510	0	1	0	0	0	0	0	0
Sprino_c28610_g1_i1|m.110353	1	9	10	5	4	8	6	5
Sprino_c17651_g1_i1|m.6406	1649	2112	2018	1763	1734	1470	1331	1272
Sprino_c26421_g6_i3|m.59689	1148	1400	1457	1203	1699	1424	1026	875
Sprino_c19987_g1_i1|m.10621	63	55	70	56	83	59	59	50
Sprino_c25251_g1_i2|m.40608	108	143	167	125	137	154	115	102
Sprino_c22528_g2_i1|m.19496	129	186	196	162	126	104	115	94
Sprino_c24915_g1_i2|m.36818	3418	4094	4510	4104	3804	3535	3251	2570
Sprino_c24438_g2_i7|m.32029	295	403	590	463	1067	871	465	394
Sprino_c24058_g1_i7|m.28987	26	33	29	21	17	15	31	32
Sprino_c27133_g4_i4|m.76649	1004	1142	1506	1096	1732	1471	1095	804
Sprino_c27270_g8_i12|m.79971	25	22	28	16	488	481	31	10
Sprino_c22648_g1_i1|m.19971	2205	2749	3234	2701	2884	2671	2116	1876
Sprino_c19454_g1_i3|m.9544	184	211	251	205	268	237	159	160
Sprino_c27976_g6_i1|m.96648	658	904	1032	849	1114	959	643	527
Sprino_c23456_g1_i2|m.24579	692	923	847	838	814	800	590	581
Sprino_c23855_g2_i8|m.27352	108	137	147	146	120	145	112	101
Sprino_c26640_g1_i5|m.64655	813	993	1253	1001	1374	1260	843	796
Sprino_c23855_g2_i8|m.27353	5	5	5	8	4	6	0	7
Sprino_c27672_g2_i2|m.89523	484	614	669	583	746	666	421	412
Sprino_c26935_g12_i1|m.72355	31	39	39	23	54	50	46	36
Sprino_c28643_g4_i6|m.111177	92	136	142	113	70	94	200	142
Sprino_c26128_g2_i4|m.53763	732	845	1002	808	1020	914	736	635
Sprino_c23855_g2_i8|m.27355	2	3	7	3	2	4	2	3
Sprino_c17589_g2_i1|m.6319	1	1	1	2	1	4	2	1
Sprino_c22979_g1_i3|m.21722	175	217	191	193	180	191	185	163
Sprino_c16087_g1_i3|m.5160	27	42	50	57	69	53	50	42
Sprino_c54384_g1_i1|m.123584	0	1	0	0	0	0	0	0
Sprino_c27077_g11_i4|m.75501	183	195	250	169	265	231	196	154
Sprino_c27709_g15_i7|m.90453	217	238	300	219	266	215	188	131
Sprino_c22346_g1_i3|m.18597	68	105	107	103	128	106	73	85
Sprino_c23564_g3_i5|m.25224	1	1	3	1	2	7	2	1
Sprino_c25839_g1_i7|m.48330	135	204	164	184	165	167	130	133
Sprino_c20248_g5_i1|m.11069	278	254	309	265	290	301	260	270
Sprino_c24290_g1_i10|m.30763	13	24	29	21	38	24	33	17
Sprino_c22626_g2_i2|m.19903	9	12	15	15	12	10	4	5
Sprino_c45730_g1_i1|m.122732	100	92	125	84	136	91	99	58
Sprino_c3789_g1_i1|m.695	16	23	36	18	11	6	18	17
Sprino_c22613_g1_i4|m.19857	556	716	787	740	689	756	760	614
Sprino_c25392_g2_i2|m.42267	5165	6404	7399	6361	9799	10282	5216	5318
Sprino_c4599_g1_i2|m.959	17	16	16	17	15	16	16	15
Sprino_c25787_g2_i3|m.47547	53	70	76	54	70	50	44	61
Sprino_c21767_g1_i4|m.15939	122	135	176	149	164	129	195	156
Sprino_c41896_g1_i1|m.122574	0	0	0	0	2	0	0	1
Sprino_c27411_g3_i7|m.83637	112	163	163	157	146	140	105	68
Sprino_c25419_g1_i8|m.42594	574	697	632	635	677	695	474	389
Sprino_c19866_g2_i2|m.10380	148	186	215	159	221	175	174	122
Sprino_c27686_g2_i10|m.89945	504	589	661	607	609	651	418	424
Sprino_c25124_g3_i7|m.38990	43	67	89	65	76	64	50	45
Sprino_c25419_g1_i8|m.42595	826	924	1047	887	1181	899	658	514
Sprino_c27322_g8_i5|m.81352	29	47	44	38	44	40	41	34
Sprino_c26383_g5_i13|m.58723	831	931	1052	822	1060	887	751	626
Sprino_c28734_g5_i3|m.112789	2234	2721	2932	2618	2839	2706	2003	1726
Sprino_c26183_g2_i4|m.54853	65	69	122	61	103	62	64	56
Sprino_c27664_g10_i1|m.89360	73	98	85	91	101	84	73	45
Sprino_c22933_g3_i3|m.21440	469	570	485	423	306	318	269	229
Sprino_c28121_g1_i7|m.100013	101	108	109	87	117	93	76	65
Sprino_c18179_g1_i1|m.7083	33	33	69	53	54	41	39	33
Sprino_c19606_g2_i1|m.9775	86	108	96	59	114	140	99	92
Sprino_c27964_g8_i2|m.96327	33	39	35	41	27	28	35	28
Sprino_c13110_g2_i1|m.2992	83	83	160	100	145	123	111	109
Sprino_c24049_g2_i2|m.28924	48	57	63	59	48	58	34	40
Sprino_c25158_g1_i10|m.39391	130	132	179	164	120	97	61	59
Sprino_c6089_g1_i1|m.1322	3	2	8	1	7	3	2	6
Sprino_c26511_g14_i4|m.61808	93	125	145	122	194	128	107	81
Sprino_c26654_g7_i7|m.64981	20	14	21	21	28	19	20	16
Sprino_c27040_g2_i12|m.74734	206	268	271	260	292	245	239	201
Sprino_c27285_g1_i1|m.80394	253	323	332	353	204	292	252	316
Sprino_c19995_g1_i2|m.10641	8	9	7	4	5	9	7	4
Sprino_c26770_g11_i2|m.67985	26	30	27	19	31	14	24	14
Sprino_c26438_g4_i15|m.60132	543	630	666	553	603	486	418	342
Sprino_c27666_g4_i3|m.89419	28	37	45	46	33	25	27	17
Sprino_c20992_g1_i4|m.13357	908	1183	1270	1122	1012	906	1052	829
Sprino_c13725_g1_i2|m.3256	193	243	294	246	295	258	198	192
Sprino_c20671_g1_i2|m.12337	17	22	26	30	31	33	24	19
Sprino_c24638_g2_i3|m.33866	5	6	6	9	6	4	2	6
Sprino_c27265_g2_i2|m.79715	750	976	1081	911	1194	1316	762	732
Sprino_c27952_g3_i8|m.96052	10	6	9	12	10	4	5	4
Sprino_c28849_g5_i2|m.115277	0	2	1	0	0	2	0	0
Sprino_c28629_g4_i1|m.110837	1472	2056	2150	1898	2448	2507	1520	1380
Sprino_c28849_g5_i2|m.115278	0	2	1	0	0	1	3	2
Sprino_c27428_g7_i3|m.83956	28	19	40	18	26	22	21	13
Sprino_c24841_g1_i2|m.35933	1	0	2	1	0	0	0	1
Sprino_c15925_g2_i1|m.4957	0	0	1	0	1	2	0	0
Sprino_c24029_g1_i1|m.28755	6	11	9	7	9	8	7	10
Sprino_c20640_g1_i5|m.12257	18	18	30	24	18	12	17	20
Sprino_c26854_g2_i8|m.70405	475	585	611	592	655	747	583	441
Sprino_c26437_g1_i21|m.60091	25	34	33	29	33	35	25	27
Sprino_c27869_g2_i3|m.94383	305	457	419	391	379	408	326	267
Sprino_c27898_g1_i20|m.94936	96	104	128	115	134	103	88	73
Sprino_c26709_g1_i2|m.66316	111	104	160	117	124	93	155	95
Sprino_c20962_g1_i2|m.13269	109	108	139	107	102	131	196	182
Sprino_c27900_g3_i3|m.94942	220	292	301	267	287	219	217	190
Sprino_c25304_g1_i7|m.41235	937	1118	1115	989	1132	1302	811	760
Sprino_c28672_g1_i2|m.111828	328	431	521	448	478	454	465	417
Sprino_c75547_g1_i1|m.125443	0	0	0	0	1	2	1	0
Sprino_c28936_g4_i7|m.116878	223	241	330	236	327	214	242	217
Sprino_c27761_g9_i4|m.91725	235	240	392	263	387	328	351	293
Sprino_c17466_g1_i1|m.6167	1263	1514	1374	1269	1487	1277	805	739
Sprino_c24296_g1_i6|m.30804	1	3	0	4	4	4	3	2
Sprino_c24518_g3_i6|m.32805	388	435	433	438	401	428	333	324
Sprino_c24037_g2_i6|m.28814	189	288	308	277	290	285	265	242
Sprino_c28209_g5_i6|m.102064	40	64	61	48	75	69	46	40
Sprino_c15360_g1_i1|m.4670	0	0	0	0	0	1	1	0
Sprino_c22284_g1_i1|m.18282	1336	1749	1828	1605	1403	1504	1277	1122
Sprino_c23188_g1_i5|m.22970	1	0	1	0	3	0	1	0
Sprino_c37684_g1_i1|m.122065	6	7	1	0	8	7	0	0
Sprino_c14290_g1_i2|m.3939	367	498	545	395	602	512	405	324
Sprino_c24444_g2_i2|m.32060	249	296	279	232	367	320	161	164
Sprino_c28445_g10_i8|m.106897	337	415	480	377	556	448	383	261
Sprino_c17490_g1_i2|m.6191	1459	1489	1997	1583	2091	1965	1295	1148
Sprino_c20599_g1_i1|m.12105	128	167	232	168	230	168	166	166
Sprino_c28131_g6_i3|m.100298	32	31	43	33	46	23	39	22
Sprino_c26132_g1_i4|m.53844	47	34	88	56	45	45	114	101
Sprino_c28768_g11_i2|m.113557	223	285	352	322	328	288	380	293
Sprino_c24236_g2_i10|m.30363	51	60	55	79	59	59	47	32
Sprino_c27999_g2_i6|m.97221	24	27	34	24	38	38	38	36
Sprino_c24769_g1_i3|m.35207	69	92	89	83	86	68	55	41
Sprino_c26063_g2_i4|m.52667	118	187	221	210	127	145	135	113
Sprino_c26454_g10_i3|m.60475	139	132	142	135	167	181	115	101
Sprino_c22170_g1_i4|m.17770	334	410	440	412	398	378	260	232
Sprino_c27945_g3_i2|m.95841	47	47	71	47	76	48	34	31
Sprino_c26237_g2_i3|m.56024	366	422	504	426	441	378	430	304
Sprino_c27896_g3_i12|m.94886	12	15	6	3	4	2	18	5
Sprino_c25826_g12_i5|m.48176	163	215	295	270	169	117	321	263
Sprino_c25695_g3_i6|m.46135	3362	4138	4489	4211	4145	3962	3543	3132
Sprino_c26010_g1_i10|m.51503	162	204	237	243	305	225	226	240
Sprino_c27933_g5_i2|m.95656	201	285	306	242	305	273	212	200
Sprino_c27753_g10_i2|m.91507	492	604	555	486	474	438	583	484
Sprino_c55733_g1_i1|m.123769	0	1	2	1	0	0	15	14
Sprino_c20136_g1_i3|m.10863	0	0	0	0	1	0	0	4
Sprino_c28085_g4_i7|m.99244	44	73	70	69	75	55	50	40
Sprino_c28780_g8_i2|m.113790	842	1010	1047	1064	1172	1189	807	739
Sprino_c21863_g1_i1|m.16353	0	0	0	0	0	0	0	0
Sprino_c23497_g1_i5|m.24791	344	394	693	498	1705	1480	658	553
Sprino_c22293_g2_i1|m.18330	54	66	80	67	82	88	49	42
Sprino_c22370_g1_i5|m.18712	187	226	250	203	193	180	170	162
Sprino_c26159_g1_i14|m.54324	26	28	17	21	23	33	39	39
Sprino_c27746_g4_i5|m.91333	323	444	296	270	425	293	111	56
Sprino_c25785_g3_i4|m.47511	180	259	289	222	249	232	179	130
Sprino_c23753_g1_i5|m.26653	187	215	226	179	180	175	234	204
Sprino_c15900_g1_i2|m.4940	83	93	109	83	118	65	112	55
Sprino_c18847_g1_i3|m.8329	75	86	83	64	54	80	123	121
Sprino_c23627_g1_i5|m.25740	56	43	61	53	58	56	31	33
Sprino_c26597_g1_i1|m.63619	5	55	11	2	10	67	4	7
Sprino_c26016_g1_i2|m.51653	717	848	862	690	704	609	626	510
Sprino_c24942_g1_i3|m.37127	164	180	232	170	216	217	162	119
Sprino_c27340_g2_i10|m.81826	79	92	109	88	119	101	89	63
Sprino_c19936_g1_i4|m.10519	221	266	287	275	244	276	260	214
Sprino_c28100_g5_i7|m.99579	3873	5196	5278	4359	5861	5105	3311	3008
Sprino_c46360_g1_i1|m.122864	0	0	0	0	3	4	0	0
Sprino_c22242_g1_i1|m.18046	7288	8767	10457	9460	11597	10398	8003	6574
Sprino_c26259_g2_i5|m.56505	108	124	157	135	141	139	163	164
Sprino_c28970_g9_i1|m.117364	380	422	438	378	444	530	326	311
Sprino_c28529_g2_i9|m.108906	14	23	29	29	22	30	22	14
Sprino_c22017_g1_i2|m.17062	21438	24905	26836	23446	28275	29605	15963	15761
Sprino_c27101_g5_i2|m.75939	27	31	32	14	29	26	36	28
Sprino_c26514_g8_i5|m.61964	63	57	62	46	61	53	32	29
Sprino_c27340_g2_i10|m.81828	4	6	7	5	9	5	11	8
Sprino_c27630_g2_i4|m.88607	80	118	124	112	62	70	81	50
Sprino_c22080_g1_i4|m.17318	51	76	70	64	87	87	61	44
Sprino_c26144_g4_i3|m.54010	1665	1664	2041	1385	1747	1236	1395	1046
Sprino_c28074_g1_i6|m.98970	35	41	58	43	43	45	53	47
Sprino_c21164_g1_i1|m.13901	92	123	98	96	72	79	76	70
Sprino_c26305_g1_i10|m.57291	22	39	52	43	28	30	29	28
Sprino_c28862_g9_i1|m.115520	151	178	181	159	157	146	149	119
Sprino_c27622_g3_i9|m.88432	41	49	48	48	56	38	43	33
Sprino_c26489_g7_i2|m.61173	395	530	633	525	517	435	405	349
Sprino_c27863_g5_i2|m.94271	1	1	1	3	1	6	2	1
Sprino_c27616_g10_i3|m.88315	1876	2426	2823	2423	2890	2620	1920	1850
Sprino_c26918_g1_i23|m.71876	25	29	38	20	47	56	23	54
Sprino_c28863_g11_i3|m.115581	356	470	439	457	436	511	338	315
Sprino_c26680_g1_i15|m.65627	137	164	187	156	218	176	141	119
Sprino_c27099_g3_i5|m.75903	12	12	8	12	9	7	8	5
Sprino_c21807_g1_i3|m.16095	117	139	147	128	94	92	197	148
Sprino_c23478_g1_i5|m.24697	9	4	14	5	10	9	4	3
Sprino_c23405_g1_i6|m.24333	74	105	127	104	78	69	88	82
Sprino_c28067_g1_i1|m.98817	382	502	585	488	540	451	441	379
Sprino_c54090_g1_i1|m.123538	300	397	366	373	252	258	213	191
Sprino_c28052_g1_i10|m.98468	13	24	32	33	17	29	31	18
Sprino_c27678_g5_i4|m.89748	38	55	54	46	32	37	44	22
Sprino_c24982_g2_i3|m.37467	35	31	56	35	49	31	36	25
Sprino_c26383_g7_i3|m.58731	37	56	78	52	83	49	51	43
Sprino_c28531_g2_i6|m.108954	2309	2823	3183	2795	3182	2865	2434	2046
Sprino_c17915_g1_i1|m.6696	580	722	806	707	669	667	775	709
Sprino_c8289_g1_i1|m.1713	2416	2707	4409	3796	2998	2543	4970	4582
Sprino_c46921_g1_i1|m.122976	0	1	1	1	0	1	1	0
Sprino_c46097_g1_i1|m.122814	1	0	2	0	7	0	3	3
Sprino_c53109_g1_i1|m.123433	0	1	0	0	0	1	2	0
Sprino_c27559_g3_i7|m.86972	16	29	31	18	17	22	24	22
Sprino_c29118_g4_i2|m.119689	38	52	51	50	60	57	46	39
Sprino_c27559_g3_i7|m.86973	37	54	45	52	53	34	43	28
Sprino_c22588_g1_i2|m.19749	507	636	729	641	729	725	588	480
Sprino_c24336_g1_i4|m.31093	1211	1478	1633	1330	1911	1649	1427	1223
Sprino_c20741_g3_i1|m.12595	3	1	1	0	0	0	1	0
Sprino_c24567_g1_i1|m.33200	239	246	249	237	117	126	233	178
Sprino_c4205_g1_i1|m.835	2043	2471	2588	2378	2573	2087	1631	1329
Sprino_c26302_g1_i7|m.57249	1	1	1	0	3	2	1	3
Sprino_c37639_g1_i1|m.122053	837	1201	1172	1005	1124	1074	885	715
Sprino_c28985_g12_i6|m.117591	303	379	410	364	289	300	248	201
Sprino_c23241_g1_i6|m.23291	225	274	283	265	303	296	192	179
Sprino_c25890_g5_i1|m.49275	2682	2775	2260	2408	2363	2507	2410	1825
Sprino_c19088_g1_i1|m.8852	38	41	47	36	37	18	58	43
Sprino_c27575_g11_i7|m.87404	10	8	12	13	35	33	22	13
Sprino_c26455_g1_i3|m.60534	237	264	311	267	241	289	248	200
Sprino_c26662_g8_i1|m.65177	1	5	3	6	4	7	7	4
Sprino_c26624_g4_i6|m.64268	210	284	307	238	265	291	232	164
Sprino_c25717_g1_i13|m.46340	127	147	180	154	123	85	86	75
Sprino_c23241_g1_i6|m.23292	136	173	204	159	237	225	178	119
Sprino_c19572_g1_i3|m.9727	151	189	230	179	174	178	200	181
Sprino_c22534_g1_i5|m.19524	9	14	15	20	34	29	18	16
Sprino_c28341_g2_i4|m.104861	116	178	185	123	149	129	150	134
Sprino_c28093_g1_i5|m.99396	8678	10585	10878	10046	10595	11246	8642	7817
Sprino_c19440_g1_i2|m.9513	1	2	40	25	13	6	11	14
Sprino_c26099_g1_i5|m.53250	47	69	49	45	21	19	35	29
Sprino_c27431_g1_i8|m.84034	3479	4121	4457	3906	5104	4795	3078	2697
Sprino_c26558_g1_i10|m.62875	135	154	180	164	243	244	225	196
Sprino_c28872_g5_i8|m.115725	135	170	206	156	184	129	184	116
Sprino_c23338_g1_i3|m.23928	18	18	32	29	25	18	33	24
Sprino_c22734_g1_i3|m.20310	3	25	24	19	17	35	16	11
Sprino_c28069_g3_i2|m.98857	538	701	816	708	320	325	530	457
Sprino_c26881_g1_i21|m.70957	29	28	39	24	37	38	24	30
Sprino_c19207_g1_i1|m.9109	3322	4204	4512	4316	4700	5040	3409	2959
Sprino_c28134_g1_i6|m.100358	40	60	38	41	15	10	0	2
Sprino_c26790_g4_i3|m.68580	336	396	342	364	292	276	206	195
Sprino_c26015_g1_i12|m.51635	62	85	114	70	106	65	93	59
Sprino_c18310_g1_i3|m.7375	32	29	58	37	57	38	40	23
Sprino_c28134_g1_i6|m.100359	375	411	528	472	578	606	460	394
Sprino_c28762_g3_i3|m.113391	44	54	83	62	58	56	66	46
Sprino_c29277_g1_i1|m.121291	4	1	3	0	1	1	1	4
Sprino_c19940_g1_i7|m.10536	183	257	300	257	304	268	248	225
Sprino_c28762_g3_i3|m.113392	153	153	175	147	143	136	153	114
Sprino_c25833_g6_i1|m.48283	286	358	447	364	391	337	332	251
Sprino_c20954_g1_i1|m.13252	4	1	1	5	6	2	3	3
Sprino_c27169_g1_i5|m.77542	72	73	76	60	83	78	69	43
Sprino_c26380_g1_i1|m.58660	55	71	118	94	86	79	58	55
Sprino_c27721_g12_i2|m.90763	43	45	67	58	66	43	57	33
Sprino_c27850_g1_i7|m.93916	105	111	136	129	132	119	108	80
Sprino_c24205_g1_i2|m.30103	136	187	211	158	158	126	107	80
Sprino_c25210_g7_i1|m.40138	603	783	769	704	599	679	694	519
Sprino_c28406_g2_i1|m.106131	116	152	208	161	137	131	123	113
Sprino_c21034_g1_i3|m.13484	792	1046	1073	977	1234	1168	840	749
Sprino_c28301_g4_i12|m.103950	363	426	449	385	443	367	350	280
Sprino_c21956_g2_i6|m.16831	349	431	554	456	448	339	287	226
Sprino_c23894_g1_i2|m.27654	282	331	412	337	430	356	271	227
Sprino_c26542_g2_i2|m.62432	38	58	73	46	51	61	47	43
Sprino_c26085_g1_i3|m.52977	5	9	15	9	10	10	13	12
Sprino_c27180_g1_i1|m.77724	15	14	22	23	44	24	29	28
Sprino_c18392_g1_i1|m.7495	862	968	998	1008	673	737	1320	1179
Sprino_c21016_g2_i2|m.13419	33	34	29	18	2	3	12	16
Sprino_c28539_g2_i1|m.109138	80	82	100	80	81	89	79	62
Sprino_c18149_g1_i4|m.7034	64	71	87	69	57	54	56	57
Sprino_c24776_g3_i2|m.35254	37	55	60	46	42	39	37	24
Sprino_c27269_g15_i1|m.79879	303	369	404	385	381	395	319	272
Sprino_c28886_g5_i5|m.115983	628	730	901	757	755	657	665	576
Sprino_c24130_g1_i9|m.29513	872	1154	1304	1012	1426	1354	766	723
Sprino_c23959_g1_i10|m.28213	19	32	23	18	22	29	17	19
Sprino_c53962_g1_i1|m.123514	19	17	23	16	18	22	33	29
Sprino_c28645_g1_i7|m.111201	2190	2629	2939	2631	2910	2760	2225	1974
Sprino_c18010_g1_i3|m.6835	9	8	9	11	9	10	26	9
Sprino_c26359_g7_i4|m.58228	329	436	427	333	524	519	285	274
Sprino_c26650_g2_i1|m.64873	444	472	460	393	371	425	328	284
Sprino_c2176_g1_i2|m.495	7	3	18	9	1	1	7	5
Sprino_c28401_g4_i23|m.105974	35	53	75	46	78	80	49	42
Sprino_c26786_g3_i8|m.68450	208	244	233	218	323	235	161	152
Sprino_c28195_g2_i5|m.101784	399	486	551	423	610	544	340	299
Sprino_c26319_g4_i8|m.57547	53	76	61	58	57	43	68	37
Sprino_c26875_g14_i1|m.70826	81	83	106	84	73	68	101	92
Sprino_c18250_g1_i4|m.7232	13	10	16	14	13	10	15	14
Sprino_c23101_g1_i4|m.22526	326	441	420	399	492	485	451	439
Sprino_c26319_g4_i8|m.57548	298	433	598	418	596	540	639	722
Sprino_c24493_g2_i6|m.32539	212	210	260	204	242	221	172	154
Sprino_c28093_g1_i9|m.99405	1547	2340	2343	2139	2236	2303	1849	1594
Sprino_c19669_g2_i2|m.9904	281	300	281	278	271	268	219	190
Sprino_c8498_g1_i1|m.1865	6	8	20	12	5	2	11	6
Sprino_c29006_g4_i3|m.117978	123	159	166	141	165	168	132	124
Sprino_c24790_g1_i2|m.35380	95	85	127	105	131	105	118	80
Sprino_c24956_g1_i5|m.37229	56	73	113	76	84	86	168	97
Sprino_c27525_g10_i4|m.86171	11	18	30	20	17	17	30	18
Sprino_c14932_g1_i1|m.4450	22	30	48	28	65	42	48	22
Sprino_c20799_g1_i1|m.12765	175	228	267	186	295	240	269	173
Sprino_c25155_g8_i5|m.39338	225	244	347	265	353	340	259	224
Sprino_c27965_g1_i2|m.96376	1045	1284	1457	1183	1567	1238	894	820
Sprino_c26416_g19_i5|m.59507	563	663	774	726	789	703	600	496
Sprino_c26410_g2_i17|m.59379	7	13	15	17	17	22	23	14
Sprino_c25148_g1_i7|m.39262	107	122	168	119	132	131	126	104
Sprino_c20996_g1_i2|m.13367	62	81	124	66	164	106	153	129
Sprino_c28114_g15_i8|m.99845	564	637	866	666	1023	969	541	478
Sprino_c23736_g1_i9|m.26500	49	39	41	54	46	43	30	16
Sprino_c6449_g1_i1|m.1364	1	2	7	5	10	11	25	14
Sprino_c27919_g12_i2|m.95328	520	578	704	621	727	723	504	499
Sprino_c27933_g8_i4|m.95660	104	95	120	89	147	86	70	66
Sprino_c14506_g1_i1|m.4241	3	2	7	2	9	1	9	6
Sprino_c19179_g1_i4|m.9066	22	20	23	17	24	19	21	21
Sprino_c27177_g1_i10|m.77708	5	3	4	6	13	14	15	12
Sprino_c20088_g1_i2|m.10782	0	0	1	4	0	1	0	2
Sprino_c27951_g1_i2|m.96018	224	287	262	255	143	129	235	156
Sprino_c18802_g1_i1|m.8227	1138	1381	1306	1151	1147	1000	983	804
Sprino_c26695_g10_i2|m.65922	146	183	179	140	199	186	139	127
Sprino_c27147_g3_i2|m.76949	43	48	28	30	112	86	34	22
Sprino_c28822_g1_i10|m.114706	108	154	157	157	130	164	75	77
Sprino_c23541_g2_i1|m.25050	13	10	9	8	10	13	4	6
Sprino_c24600_g1_i3|m.33475	10	18	21	16	7	7	19	8
Sprino_c26498_g3_i5|m.61470	12	20	27	17	21	24	48	26
Sprino_c25017_g1_i5|m.37854	474	640	591	556	525	506	479	448
Sprino_c11790_g1_i1|m.2641	264	327	382	335	421	389	324	305
Sprino_c28013_g15_i3|m.97648	961	1174	1318	1111	1327	1240	1147	950
Sprino_c26888_g5_i4|m.71188	835	968	1377	999	1373	1048	1163	945
Sprino_c29028_g5_i3|m.118310	28	22	37	17	26	27	22	14
Sprino_c22690_g1_i6|m.20113	175	228	277	290	218	193	261	230
Sprino_c16473_g1_i1|m.5607	7	11	8	8	5	5	1	0
Sprino_c19928_g1_i3|m.10505	103	105	213	202	103	119	195	166
Sprino_c27947_g9_i9|m.95934	329	366	375	407	315	338	309	273
Sprino_c18760_g1_i3|m.8140	97	149	128	146	41	51	142	117
Sprino_c29142_g2_i3|m.120102	7	13	13	8	10	7	17	8
Sprino_c17999_g1_i2|m.6813	502	639	600	569	605	583	503	374
Sprino_c26605_g1_i11|m.63801	15	19	31	17	14	30	15	9
Sprino_c25217_g1_i9|m.40202	73	92	101	80	96	70	72	66
Sprino_c23061_g2_i8|m.22268	40	46	76	70	45	51	54	59
Sprino_c27781_g7_i12|m.92301	12	16	24	19	14	21	11	8
Sprino_c28177_g8_i5|m.101221	48	84	86	65	60	49	46	43
Sprino_c22684_g2_i2|m.20092	164	251	325	250	289	309	204	179
Sprino_c27246_g14_i5|m.79283	157	160	215	185	210	181	153	103
Sprino_c28177_g8_i5|m.101222	9	13	14	10	13	14	12	10
Sprino_c26611_g2_i4|m.63922	30	31	37	37	24	23	22	18
Sprino_c23605_g1_i5|m.25548	32	31	38	29	27	45	30	48
Sprino_c22410_g1_i4|m.18922	250	319	369	297	556	413	292	225
Sprino_c14363_g1_i1|m.4044	20	35	38	24	3	5	17	12
Sprino_c26831_g4_i7|m.69693	65	79	92	91	104	62	59	56
Sprino_c22841_g1_i1|m.20903	279	352	399	357	411	409	298	247
Sprino_c26137_g2_i3|m.53923	35	53	85	56	59	37	74	75
Sprino_c26611_g2_i4|m.63923	7	23	14	9	10	10	5	10
Sprino_c28001_g6_i13|m.97283	78	67	92	64	82	80	69	43
Sprino_c28812_g4_i4|m.114473	1047	1299	1458	1220	1545	1459	1085	928
Sprino_c28553_g6_i1|m.109364	1172	1315	1589	1413	1571	1489	1243	1107
Sprino_c25813_g1_i9|m.47956	127	171	169	160	160	167	145	124
Sprino_c28685_g1_i8|m.112057	10	14	19	14	17	20	14	11
Sprino_c22301_g1_i2|m.18390	116	178	145	155	167	133	131	106
Sprino_c25679_g3_i4|m.45921	944	1299	1352	1237	1464	1474	1046	961
Sprino_c28973_g1_i2|m.117425	18	29	83	80	43	26	36	43
Sprino_c28913_g10_i2|m.116462	0	1	0	0	1	0	0	0
Sprino_c29188_g1_i3|m.120601	49	73	59	59	60	59	55	49
Sprino_c26255_g10_i11|m.56467	109	113	128	96	86	96	100	88
Sprino_c25273_g1_i4|m.40865	371	427	496	447	456	475	382	378
Sprino_c24427_g1_i2|m.31926	30	27	31	14	11	14	15	20
Sprino_c22363_g2_i4|m.18671	13	10	13	5	5	13	16	26
Sprino_c23545_g1_i6|m.25074	67	93	88	78	63	75	52	56
Sprino_c20266_g1_i2|m.11116	213	313	318	269	248	268	256	232
Sprino_c24745_g3_i3|m.34952	231	268	277	248	334	279	201	168
Sprino_c26523_g8_i1|m.62162	1281	1625	1763	1615	1238	1133	1478	1144
Sprino_c29194_g3_i2|m.120650	17	21	27	22	18	22	20	15
Sprino_c18530_g2_i1|m.7738	12	13	12	6	1	2	3	2
Sprino_c28663_g9_i8|m.111612	442	548	606	513	701	631	510	447
Sprino_c26219_g13_i1|m.55684	72	91	94	82	143	162	69	58
Sprino_c70126_g1_i1|m.124886	8	14	23	19	35	25	21	22
Sprino_c20627_g1_i4|m.12207	477	559	636	605	669	589	548	417
Sprino_c27996_g4_i1|m.97181	53	117	83	81	90	24	85	71
Sprino_c22260_g1_i6|m.18164	121	151	191	166	129	131	165	150
Sprino_c20337_g1_i1|m.11300	7960	8438	10266	9602	9669	8726	12066	7837
Sprino_c28802_g2_i3|m.114261	15	17	11	13	0	0	1	1
Sprino_c39682_g1_i1|m.122403	0	0	1	1	0	0	2	0
Sprino_c25477_g1_i8|m.43266	217	304	316	273	333	346	227	198
Sprino_c26826_g1_i8|m.69556	57	102	138	118	82	133	72	79
Sprino_c26997_g6_i5|m.73566	169	235	233	213	208	223	146	119
Sprino_c21772_g1_i2|m.15959	120	143	132	115	195	154	105	123
Sprino_c28830_g8_i6|m.114861	21	20	26	24	27	20	27	23
Sprino_c26621_g2_i15|m.64186	447	550	609	582	501	503	499	402
Sprino_c28259_g1_i1|m.103075	68	78	77	69	77	75	56	48
Sprino_c26621_g2_i15|m.64187	1	0	0	0	1	0	0	0
Sprino_c25980_g2_i13|m.50912	1574	1951	2189	2012	2554	2499	1304	1411
Sprino_c28120_g3_i15|m.99987	98	115	97	94	78	104	84	92
Sprino_c28299_g2_i1|m.103848	27	32	43	61	47	30	31	19
Sprino_c28225_g4_i2|m.102332	201	275	338	285	346	292	300	216
Sprino_c23577_g1_i3|m.25325	54	92	99	117	56	45	84	78
Sprino_c1626_g1_i2|m.366	2	3	6	2	3	3	6	7
Sprino_c23349_g2_i7|m.23990	12	23	22	17	7	10	8	16
Sprino_c25109_g1_i8|m.38817	1366	1708	1886	1826	2085	2226	1416	1348
Sprino_c29137_g1_i2|m.120054	21	25	31	29	33	26	23	32
Sprino_c28807_g5_i5|m.114359	717	834	893	780	1005	913	568	504
Sprino_c27749_g7_i5|m.91412	138	146	150	119	242	165	85	52
Sprino_c29048_g2_i5|m.118610	2	2	3	2	2	3	12	10
Sprino_c27223_g3_i16|m.78701	26	30	24	15	55	16	6	3
Sprino_c28880_g3_i17|m.115892	288	369	382	383	448	432	316	261
Sprino_c26890_g2_i15|m.71252	147	177	220	174	204	220	141	143
Sprino_c27231_g5_i6|m.78954	143	148	247	171	356	286	202	166
Sprino_c22816_g1_i2|m.20764	2074	2561	2945	2523	3509	3042	2688	2123
Sprino_c27011_g8_i8|m.73883	38	38	54	43	55	46	41	28
Sprino_c28730_g3_i8|m.112734	282	342	474	359	1613	630	60	33
Sprino_c27872_g1_i6|m.94449	358	375	456	366	203	185	436	306
Sprino_c14020_g1_i3|m.3600	2	1	1	0	0	3	2	1
Sprino_c58275_g1_i1|m.123987	1	1	0	2	1	1	1	1
Sprino_c28403_g11_i3|m.106066	212	248	275	222	264	200	230	182
Sprino_c27424_g7_i6|m.83839	213	248	285	271	350	341	250	211
Sprino_c27361_g1_i8|m.82476	21	25	39	31	64	45	35	23
Sprino_c25173_g1_i5|m.39545	60	69	80	67	91	79	69	46
Sprino_c27658_g9_i1|m.89208	19	27	44	34	37	39	30	22
Sprino_c22910_g1_i6|m.21293	197	228	263	246	343	283	240	171
Sprino_c28745_g1_i4|m.112973	107	121	135	119	127	105	161	144
Sprino_c27379_g7_i9|m.82905	3	1	4	1	6	2	5	4
Sprino_c5219_g1_i2|m.1194	0	0	29	35	0	0	7	4
Sprino_c27515_g6_i6|m.85943	44	39	59	47	76	63	49	42
Sprino_c21911_g1_i1|m.16588	130	137	118	130	165	133	138	70
Sprino_c71056_g1_i1|m.125054	2	2	1	0	3	5	4	5
Sprino_c22297_g1_i6|m.18360	38	43	51	32	39	44	32	28
Sprino_c28789_g1_i7|m.113983	109	154	141	130	160	145	93	101
Sprino_c46671_g1_i1|m.122928	192	243	286	255	293	271	240	190
Sprino_c26068_g1_i10|m.52784	33	49	67	46	55	37	46	42
Sprino_c27362_g1_i11|m.82507	718	862	888	782	855	881	635	566
Sprino_c17565_g1_i1|m.6300	63	80	107	85	96	58	121	89
Sprino_c25095_g1_i2|m.38646	160	177	245	199	232	263	157	173
Sprino_c26785_g4_i4|m.68416	326	396	534	383	454	379	378	276
Sprino_c27431_g2_i1|m.84028	548	706	804	653	989	841	482	468
Sprino_c29082_g8_i5|m.119218	18	27	42	33	24	35	27	17
Sprino_c19752_g1_i2|m.10131	158	125	192	141	153	109	97	90
Sprino_c22757_g2_i7|m.20501	39	49	41	43	56	42	36	27
Sprino_c26113_g2_i8|m.53561	266	260	332	255	331	308	256	186
Sprino_c27385_g1_i3|m.83027	67	85	79	77	94	88	87	53
Sprino_c25487_g1_i2|m.43400	8	11	17	10	73	48	33	20
Sprino_c27227_g2_i2|m.78806	92	92	134	101	168	150	73	79
Sprino_c23025_g1_i5|m.22065	74	102	103	102	104	76	106	76
Sprino_c25056_g1_i2|m.38279	1	1	10	7	3	7	4	3
Sprino_c27353_g8_i2|m.82170	111	156	169	144	198	142	124	116
Sprino_c23001_g2_i2|m.21864	330	638	503	576	432	475	417	327
Sprino_c27929_g9_i4|m.95591	81	118	144	144	114	136	110	108
Sprino_c28274_g5_i9|m.103455	231	301	325	273	323	272	242	192
Sprino_c23365_g1_i5|m.24105	86	111	107	86	105	107	96	96
Sprino_c25326_g1_i9|m.41490	158	221	231	199	202	203	169	133
Sprino_c28878_g13_i5|m.115818	19	24	17	15	18	13	18	11
Sprino_c27984_g3_i10|m.97003	46	40	72	39	55	29	44	31
Sprino_c28274_g5_i9|m.103456	136	161	169	160	208	160	159	122
Sprino_c24200_g3_i5|m.30045	632	763	700	668	810	866	500	508
Sprino_c26417_g11_i1|m.59527	102	128	165	148	115	124	150	97
Sprino_c28878_g6_i9|m.115804	4361	5437	5934	5607	4036	4153	6136	5617
Sprino_c27066_g3_i2|m.75311	2	0	1	1	2	0	0	0
Sprino_c26493_g11_i6|m.61297	1512	1822	2258	1941	1784	1586	1532	1236
Sprino_c24931_g1_i2|m.37017	89	123	133	104	121	99	90	79
Sprino_c27067_g5_i6|m.75322	428	488	377	296	1511	1297	249	174
Sprino_c26893_g2_i3|m.71333	928	1050	867	783	959	781	490	408
Sprino_c15685_g2_i1|m.4829	1	3	8	4	3	13	2	4
Sprino_c14476_g1_i2|m.4215	83	112	119	112	103	120	83	81
Sprino_c12426_g1_i1|m.2842	20	19	5	18	51	31	9	3
Sprino_c28893_g10_i3|m.116104	158	219	233	198	236	212	156	123
Sprino_c26630_g2_i17|m.64380	2	4	5	6	2	6	5	4
Sprino_c27348_g5_i3|m.82031	309	435	381	345	262	281	227	225
Sprino_c27929_g13_i1|m.95605	210	249	343	264	328	255	189	191
Sprino_c23273_g1_i1|m.23519	39	58	55	62	69	47	47	31
Sprino_c28163_g3_i14|m.100920	578	713	774	656	1012	756	559	459
Sprino_c25802_g1_i9|m.47709	95	116	137	106	153	137	137	106
Sprino_c26439_g1_i2|m.60142	52	57	73	58	77	70	53	42
Sprino_c26230_g4_i1|m.55900	344	475	440	376	387	393	294	255
Sprino_c28617_g6_i9|m.110612	654	758	721	754	893	903	559	563
Sprino_c27797_g3_i5|m.92666	157	208	233	186	209	178	179	158
Sprino_c28254_g19_i2|m.102981	809	1061	1048	1022	1253	1141	768	689
Sprino_c26982_g8_i5|m.73271	59	57	73	66	63	60	101	81
Sprino_c24223_g1_i7|m.30229	73	92	132	88	145	129	97	53
Sprino_c29013_g4_i8|m.118133	373	487	612	550	863	883	560	522
Sprino_c21659_g2_i1|m.15453	1803	2297	2173	2176	2211	2475	2251	2017
Sprino_c27444_g7_i2|m.84288	5	7	15	16	6	10	11	10
Sprino_c17647_g1_i1|m.6401	29	32	16	22	4	5	19	11
Sprino_c27481_g3_i3|m.85146	4553	5224	5701	4722	7424	7164	4164	3916
Sprino_c18306_g1_i3|m.7360	177	214	221	184	179	152	143	118
Sprino_c26656_g2_i3|m.65013	224	277	333	288	332	251	296	201
Sprino_c27454_g1_i5|m.84512	2	2	4	1	1	3	3	2
Sprino_c26280_g2_i4|m.56928	1034	1176	1500	1115	1622	1370	937	789
Sprino_c23413_g1_i7|m.24363	249	285	300	305	379	319	254	226
Sprino_c4498_g1_i1|m.918	894	977	1219	876	800	649	1301	1081
Sprino_c24841_g1_i10|m.35941	3	6	7	10	4	4	11	4
Sprino_c27340_g4_i7|m.81814	68	70	86	70	86	70	57	51
Sprino_c23837_g2_i1|m.27229	81	87	97	60	59	90	53	63
Sprino_c25224_g1_i1|m.40271	16	19	42	25	42	27	51	41
Sprino_c26005_g1_i2|m.51411	234	281	359	308	326	300	225	198
Sprino_c25484_g2_i4|m.43373	275	345	334	245	405	276	259	221
Sprino_c3626_g1_i1|m.650	457	605	999	773	920	785	819	680
Sprino_c25025_g1_i3|m.37972	942	1169	1277	1247	1327	1170	905	785
Sprino_c28427_g6_i1|m.106490	341	371	438	414	426	414	356	256
Sprino_c25151_g1_i3|m.39302	509	518	708	540	738	560	426	409
Sprino_c13711_g1_i1|m.3234	3	4	1	0	4	2	2	3
Sprino_c23410_g1_i4|m.24351	185	216	231	230	225	202	338	269
Sprino_c24644_g1_i7|m.33900	2382	2866	3267	2629	4014	3322	2125	1637
Sprino_c27592_g6_i4|m.87691	578	691	739	610	663	718	471	415
Sprino_c26147_g6_i14|m.54112	449	560	666	577	632	620	503	441
Sprino_c25720_g5_i4|m.46425	744	1051	1096	960	1229	1243	785	654
Sprino_c24245_g2_i2|m.30453	103	123	66	48	125	181	163	178
Sprino_c22607_g2_i2|m.19821	1520	1970	1946	1806	1619	1769	1405	1221
Sprino_c26147_g6_i14|m.54113	265	324	264	257	517	453	159	138
Sprino_c24860_g1_i5|m.36147	43	53	65	55	70	62	44	44
Sprino_c18092_g1_i1|m.6968	1605	2088	1496	1643	1196	1316	1378	1288
Sprino_c24632_g3_i7|m.33716	21	18	24	13	26	31	19	20
Sprino_c26843_g9_i1|m.69970	866	1190	1003	907	952	966	738	712
Sprino_c27128_g12_i5|m.76559	442	601	463	430	411	426	214	153
Sprino_c24150_g1_i6|m.29656	183	209	251	235	180	145	166	128
Sprino_c27702_g2_i5|m.90288	43	47	93	66	78	70	49	45
Sprino_c22476_g1_i1|m.19222	311	357	385	287	371	373	293	217
Sprino_c25936_g1_i5|m.50121	8	16	20	13	29	19	41	31
Sprino_c26734_g12_i1|m.66984	124	139	155	125	147	150	102	69
Sprino_c27447_g1_i12|m.84352	153	207	240	185	283	252	184	178
Sprino_c26984_g1_i4|m.73313	410	479	573	462	621	664	387	347
Sprino_c26797_g2_i2|m.68874	416	532	646	542	697	572	471	409
Sprino_c19705_g1_i3|m.10022	43	62	53	38	72	64	34	24
Sprino_c26797_g2_i2|m.68875	0	0	1	0	1	1	0	0
Sprino_c27107_g7_i21|m.76121	631	717	945	798	894	822	862	738
Sprino_c15591_g1_i2|m.4795	1177	1231	1078	999	72	89	166	183
Sprino_c25749_g9_i7|m.46919	24	24	39	33	23	30	21	20
Sprino_c28201_g3_i9|m.101903	36	49	62	48	69	68	27	31
Sprino_c24665_g1_i2|m.34118	92	101	118	116	127	125	79	96
Sprino_c23984_g1_i3|m.28411	7	11	8	4	16	16	2	1
Sprino_c28773_g1_i4|m.113653	6	14	33	21	30	33	32	17
Sprino_c23342_g1_i6|m.23954	35	43	54	40	70	60	31	35
Sprino_c26330_g1_i2|m.57731	86	90	95	91	116	109	80	52
Sprino_c22621_g1_i5|m.19890	121	140	137	103	130	144	90	63
Sprino_c20188_g2_i2|m.10937	184	241	239	196	211	190	182	157
Sprino_c8950_g1_i1|m.1993	7	3	14	6	4	2	4	3
Sprino_c19137_g1_i5|m.8971	23	23	37	22	12	15	28	10
Sprino_c26267_g5_i5|m.56638	52	45	63	41	123	105	59	37
Sprino_c27713_g4_i2|m.90569	1097	1254	1497	1315	1346	1259	1359	1167
Sprino_c22906_g1_i3|m.21283	9	10	10	14	16	14	12	7
Sprino_c28919_g1_i5|m.116596	105	122	116	113	125	136	94	84
Sprino_c26967_g9_i4|m.72892	63	92	108	96	101	77	99	79
Sprino_c28486_g7_i7|m.107826	24	22	27	23	26	21	25	16
Sprino_c23691_g2_i7|m.26168	8	5	10	11	6	8	18	18
Sprino_c25369_g1_i4|m.41961	420	534	545	474	583	530	383	355
Sprino_c27808_g2_i12|m.92853	49	88	89	64	91	94	65	43
Sprino_c26003_g14_i2|m.51379	27	33	35	24	52	36	41	30
Sprino_c26838_g6_i2|m.69834	32	20	36	23	29	38	23	17
Sprino_c24191_g2_i1|m.29985	241	266	318	227	386	330	212	189
Sprino_c28908_g2_i5|m.116407	254	285	364	273	392	342	277	207
Sprino_c27165_g2_i3|m.77449	79	88	94	81	73	72	87	52
Sprino_c23324_g1_i1|m.23840	50	71	92	72	75	78	104	84
Sprino_c29752_g1_i1|m.121407	287	399	424	350	425	319	365	264
Sprino_c26707_g5_i1|m.66293	619	832	808	766	772	724	641	527
Sprino_c27336_g11_i9|m.81693	0	1	3	1	2	3	4	0
Sprino_c22283_g1_i4|m.18279	80	116	120	125	108	110	106	89
Sprino_c28143_g1_i17|m.100521	87	111	171	123	122	104	128	111
Sprino_c29752_g1_i1|m.121408	724	835	958	721	482	376	949	680
Sprino_c28428_g5_i3|m.106535	144	159	216	155	266	200	187	134
Sprino_c28095_g8_i5|m.99475	282	331	369	360	338	378	226	209
Sprino_c23256_g1_i3|m.23393	402	385	427	383	370	378	380	340
Sprino_c24297_g1_i1|m.30811	5481	7091	7167	6132	7419	6920	4157	3785
Sprino_c24016_g1_i8|m.28639	30	49	45	43	28	11	39	21
Sprino_c7581_g1_i2|m.1516	0	0	0	0	1	1	1	0
Sprino_c21772_g1_i2|m.15960	22	24	20	19	19	9	18	20
Sprino_c27011_g9_i1|m.73874	944	990	1196	1053	1167	1071	1046	848
Sprino_c28541_g9_i2|m.109200	331	424	397	345	339	329	313	262
Sprino_c25386_g1_i1|m.42171	1011	1321	1467	1253	1331	1201	962	811
Sprino_c26560_g1_i2|m.62884	26	23	27	25	42	26	16	9
Sprino_c28338_g1_i14|m.104781	389	438	468	447	492	522	341	352
Sprino_c28317_g12_i1|m.104237	365	426	459	393	453	326	353	298
Sprino_c26866_g5_i3|m.70634	43	56	77	46	110	62	90	87
Sprino_c28056_g8_i7|m.98657	41	45	35	50	19	24	43	36
Sprino_c26705_g4_i7|m.66207	966	1206	1484	1300	1644	1592	970	848
Sprino_c28647_g10_i5|m.111248	137	197	176	189	220	199	132	124
Sprino_c28659_g5_i3|m.111498	196	247	256	241	322	380	222	192
Sprino_c28186_g1_i2|m.101513	6212	6907	8121	6710	7842	7321	5815	4925
Sprino_c27507_g8_i2|m.85728	47	37	38	31	13	14	9	13
Sprino_c26431_g4_i1|m.59923	14	16	16	13	11	15	13	9
Sprino_c25875_g1_i3|m.49035	449	475	558	502	450	345	471	324
Sprino_c23889_g1_i2|m.27625	26	19	15	24	36	27	24	12
Sprino_c27222_g10_i3|m.78652	28	28	25	33	33	29	37	41
Sprino_c26431_g4_i1|m.59924	12	18	23	16	36	25	10	10
Sprino_c29042_g14_i4|m.118535	52	68	80	56	65	70	69	52
Sprino_c29062_g11_i6|m.118926	1469	1892	2443	2152	3059	3227	1938	2015
Sprino_c26777_g11_i1|m.68142	159	201	245	226	180	163	221	165
Sprino_c26276_g2_i10|m.56872	55	84	76	71	75	93	81	78
Sprino_c17639_g2_i1|m.6382	14	6	19	17	15	12	18	12
Sprino_c28006_g7_i15|m.97421	20	18	27	24	18	19	26	21
Sprino_c3104_g1_i1|m.595	74	82	106	62	163	123	126	89
Sprino_c21231_g3_i1|m.14121	43	42	53	48	77	67	26	24
Sprino_c27657_g1_i5|m.89194	240	328	346	278	384	320	236	186
Sprino_c25962_g2_i3|m.50609	1003	1121	1230	1099	1153	1061	906	795
Sprino_c24236_g4_i2|m.30372	616	780	917	813	729	667	584	492
Sprino_c25733_g1_i2|m.46581	307	481	468	418	457	456	309	297
Sprino_c24701_g4_i4|m.34455	59	85	75	94	76	75	51	59
Sprino_c22132_g1_i2|m.17553	21	26	29	15	37	22	20	21
Sprino_c28432_g2_i1|m.106600	1236	1481	1667	1368	2655	2172	1312	1001
Sprino_c27857_g4_i4|m.94085	83	116	136	106	112	111	100	89
Sprino_c20379_g1_i2|m.11421	96	128	121	100	112	106	57	39
Sprino_c24760_g4_i10|m.35162	59	72	77	66	72	84	64	44
Sprino_c24686_g1_i7|m.34339	336	450	440	356	337	339	548	523
Sprino_c18909_g1_i2|m.8436	1	3	2	3	0	2	4	7
Sprino_c24522_g4_i2|m.32828	22	32	46	35	45	33	28	32
Sprino_c28611_g9_i3|m.110386	60	76	117	86	120	90	88	66
Sprino_c27532_g6_i2|m.86298	130	174	222	152	199	151	173	95
Sprino_c21953_g1_i3|m.16806	839	898	893	749	706	640	722	572
Sprino_c27964_g13_i2|m.96349	260	270	294	290	325	329	217	234
Sprino_c27194_g16_i1|m.78007	5	7	4	6	3	4	6	4
Sprino_c26843_g12_i2|m.69978	1570	1991	2102	1918	2264	2457	1467	1400
Sprino_c26868_g7_i4|m.70676	5149	5543	5728	5118	4768	4188	4390	3899
Sprino_c24819_g1_i7|m.35690	18	14	10	6	16	18	20	7
Sprino_c28455_g1_i14|m.107055	70	83	69	65	99	72	44	44
Sprino_c26904_g2_i14|m.71626	268	366	327	280	280	254	141	119
Sprino_c25868_g2_i3|m.48903	1510	1812	1829	1629	2051	1995	1346	1283
Sprino_c25261_g1_i8|m.40767	13	13	34	25	28	10	18	13
Sprino_c28996_g2_i3|m.117808	19	34	35	30	38	37	21	28
Sprino_c25899_g6_i9|m.49421	159	178	211	179	146	162	136	120
Sprino_c25741_g1_i4|m.46700	457	646	705	590	619	653	529	437
Sprino_c23368_g1_i8|m.24124	206	265	312	235	289	259	251	219
Sprino_c24259_g2_i4|m.30558	962	1157	1343	1133	1506	1270	927	783
Sprino_c26947_g2_i3|m.72499	744	871	956	819	1036	829	699	572
Sprino_c28996_g2_i3|m.117809	195	254	260	200	329	281	218	184
Sprino_c37906_g1_i1|m.122129	4	6	4	4	8	2	0	2
Sprino_c27452_g1_i2|m.84440	166	228	155	134	212	210	210	234
Sprino_c25958_g1_i10|m.50566	208	211	198	211	270	258	185	169
Sprino_c27266_g1_i6|m.79786	1100	1365	1382	1298	1228	1255	1052	898
Sprino_c27452_g1_i2|m.84441	89	105	132	99	101	99	88	80
Sprino_c23877_g1_i6|m.27518	21	16	32	20	31	24	29	27
Sprino_c22164_g2_i2|m.17746	1853	2214	2298	2159	1351	1367	1924	1595
Sprino_c19798_g1_i1|m.10250	11	12	10	17	4	2	11	6
Sprino_c26042_g8_i2|m.52309	14901	18789	19092	17496	25170	22048	13235	11497
Sprino_c32688_g1_i1|m.121765	1	1	1	6	1	1	0	0
Sprino_c23360_g1_i1|m.24060	19	17	20	21	31	21	21	22
Sprino_c23808_g1_i4|m.27053	851	1113	921	839	824	660	658	580
Sprino_c26084_g1_i6|m.52962	41	50	62	36	63	60	38	38
Sprino_c27154_g3_i6|m.77135	147	160	158	147	187	123	104	93
Sprino_c62229_g1_i1|m.124244	63	72	39	39	43	42	46	27
Sprino_c26084_g1_i6|m.52963	9	14	27	11	28	28	8	12
Sprino_c27228_g15_i8|m.78903	1213	1498	1496	1428	1427	1429	1275	1097
Sprino_c24286_g1_i2|m.30730	25	32	39	33	43	49	30	29
Sprino_c24773_g1_i6|m.35241	11	14	21	8	29	15	14	15
Sprino_c17182_g1_i2|m.5990	862	1031	1098	1019	1059	1024	891	814
Sprino_c27051_g2_i13|m.75007	129	121	193	132	153	162	122	126
Sprino_c27033_g10_i2|m.74505	489	543	779	644	536	445	807	720
Sprino_c26490_g4_i4|m.61208	106	116	119	110	113	89	83	68
Sprino_c23742_g1_i4|m.26552	1098	1461	1365	1285	1158	1069	857	793
Sprino_c24165_g1_i5|m.29783	40	41	43	37	56	41	43	41
Sprino_c17182_g1_i2|m.5991	64	102	90	83	102	92	66	70
Sprino_c1867_g2_i1|m.425	15	13	11	9	49	64	18	12
Sprino_c19838_g1_i1|m.10323	188	249	226	247	195	167	214	179
Sprino_c25994_g1_i2|m.51183	27	46	41	44	51	43	37	34
Sprino_c23828_g1_i1|m.27181	100	131	130	108	151	136	116	97
Sprino_c27122_g1_i4|m.76454	144	208	209	159	317	279	233	157
Sprino_c27263_g3_i3|m.79706	218	262	348	220	393	316	252	216
Sprino_c25354_g1_i10|m.41767	24	23	23	25	18	15	21	19
Sprino_c24240_g1_i12|m.30427	2	8	6	7	5	5	7	2
Sprino_c19357_g1_i3|m.9397	18	38	44	40	36	31	24	15
Sprino_c27364_g2_i1|m.82572	226	290	322	304	342	328	233	181
Sprino_c27761_g12_i6|m.91740	145	208	218	159	182	204	126	123
Sprino_c24837_g2_i2|m.35880	6	21	23	18	23	17	25	16
Sprino_c27601_g1_i18|m.87899	55	63	84	65	97	52	70	57
Sprino_c28729_g1_i10|m.112704	30	30	45	23	58	37	31	14
Sprino_c22078_g1_i7|m.17302	163	174	178	152	209	171	195	149
Sprino_c25867_g1_i4|m.48879	491	649	753	541	843	776	533	466
Sprino_c25840_g8_i4|m.48357	1386	1883	1987	1661	2271	1984	1418	1098
Sprino_c28254_g9_i1|m.102940	378	437	401	347	520	568	274	229
Sprino_c27762_g9_i11|m.91775	294	371	1195	1044	493	396	1293	1592
Sprino_c28382_g2_i6|m.105640	189	210	266	223	200	202	174	160
Sprino_c27951_g4_i4|m.96037	173	213	253	191	267	280	212	167
Sprino_c26957_g1_i3|m.72782	41	61	65	54	80	58	43	46
Sprino_c23581_g1_i6|m.25354	5290	6197	7749	6068	1538	1074	8986	6634
Sprino_c26706_g1_i2|m.66239	3608	4635	4860	4370	4900	4245	3536	3026
Sprino_c25083_g1_i6|m.38547	63	67	70	66	62	76	68	64
Sprino_c27500_g2_i3|m.85521	224	234	298	224	383	256	260	193
Sprino_c70855_g1_i1|m.125026	8	1	6	10	6	3	14	4
Sprino_c27896_g2_i3|m.94899	1100	1630	1603	1412	1561	1536	1064	867
Sprino_c22738_g1_i1|m.20339	6	20	18	16	87	97	16	11
Sprino_c25065_g2_i4|m.38370	145	196	220	183	207	171	166	174
Sprino_c25543_g1_i2|m.44200	6	6	11	2	13	12	9	6
Sprino_c47847_g1_i1|m.123091	1	0	0	1	2	8	1	0
Sprino_c28751_g2_i4|m.113047	263	333	424	318	415	321	291	239
Sprino_c23724_g2_i2|m.26386	276	336	437	347	420	367	356	296
Sprino_c18376_g3_i2|m.7467	188	304	386	276	406	357	293	327
Sprino_c27020_g2_i3|m.74224	309	418	430	382	428	449	358	318
Sprino_c18821_g1_i3|m.8266	99	134	140	133	115	119	99	69
Sprino_c27676_g8_i1|m.89654	236	281	291	249	313	270	255	196
Sprino_c8567_g1_i1|m.1900	36	44	58	71	62	61	66	39
Sprino_c26060_g1_i1|m.52644	4925	6016	6453	5172	7575	6471	3987	3816
Sprino_c22578_g2_i2|m.19714	266	285	307	241	331	271	233	210
Sprino_c31591_g1_i1|m.121685	0	0	1	0	1	1	1	1
Sprino_c27425_g4_i1|m.83871	1353	1566	1778	1575	2111	1710	1412	1091
Sprino_c23200_g1_i1|m.23061	55	67	79	58	39	22	36	30
Sprino_c27124_g3_i5|m.76494	94	108	131	118	142	101	98	71
Sprino_c21830_g2_i3|m.16225	34	36	50	34	54	59	28	37
Sprino_c27593_g2_i8|m.87719	271	363	323	330	242	259	217	184
Sprino_c24878_g1_i2|m.36340	452	484	579	482	652	621	367	310
Sprino_c24691_g1_i7|m.34380	30	43	47	29	37	37	53	40
Sprino_c21858_g1_i1|m.16338	0	0	0	0	0	0	0	0
Sprino_c25500_g1_i7|m.43553	9	4	21	8	11	11	12	9
Sprino_c28629_g15_i3|m.110866	66	75	74	68	67	68	47	40
Sprino_c24878_g1_i2|m.36341	40	36	51	45	62	53	41	46
Sprino_c28803_g25_i1|m.114279	81	84	99	65	80	75	84	79
Sprino_c26679_g4_i14|m.65607	154	157	156	153	142	143	123	106
Sprino_c26073_g1_i5|m.52847	209	268	247	232	261	272	194	170
Sprino_c29426_g1_i1|m.121336	31	37	46	35	23	13	70	43
Sprino_c16801_g1_i1|m.5836	805	957	1013	1067	182	219	1063	772
Sprino_c25734_g1_i11|m.46626	98	129	126	106	154	111	38	35
Sprino_c25670_g1_i7|m.45838	14	15	6	5	4	6	3	3
Sprino_c28940_g7_i9|m.116971	688	801	846	666	652	594	510	484
Sprino_c27201_g3_i8|m.78182	1636	2020	2329	1940	2225	2049	1509	1401
Sprino_c22445_g1_i2|m.19114	73	67	71	62	179	193	43	51
Sprino_c12631_g1_i2|m.2877	13	15	29	18	43	36	25	37
Sprino_c27832_g5_i5|m.93497	59	86	50	74	39	47	57	38
Sprino_c26596_g4_i6|m.63617	76	116	135	97	145	96	84	72
Sprino_c28613_g4_i25|m.110428	26	29	24	33	15	24	27	16
Sprino_c27998_g3_i2|m.97209	421	572	659	479	636	543	502	338
Sprino_c24508_g1_i3|m.32677	50	55	59	49	80	55	73	35
Sprino_c27832_g5_i5|m.93498	22	29	22	30	23	16	11	12
Sprino_c21885_g1_i2|m.16450	367	491	527	428	515	545	379	328
Sprino_c28689_g6_i2|m.112085	1098	1271	1548	1215	1449	1165	1034	880
Sprino_c26683_g5_i6|m.65682	75	97	107	88	98	88	94	70
Sprino_c26178_g7_i2|m.54768	231	223	271	273	255	231	207	169
Sprino_c25363_g1_i10|m.41929	135	136	211	142	169	191	163	142
Sprino_c28419_g10_i4|m.106439	168	216	220	202	151	137	200	137
Sprino_c26763_g2_i16|m.67760	2	13	18	11	10	9	6	8
Sprino_c13645_g1_i2|m.3131	1	1	2	2	4	2	0	0
Sprino_c26494_g7_i3|m.61346	20	18	33	15	24	21	19	23
Sprino_c26052_g9_i11|m.52517	254	294	383	316	394	339	283	212
Sprino_c27792_g11_i1|m.92564	37	35	20	20	26	22	31	22
Sprino_c26763_g2_i16|m.67761	11	20	17	17	25	12	15	15
Sprino_c26974_g7_i1|m.73098	960	993	1089	873	635	633	822	599
Sprino_c27174_g3_i2|m.77635	808	1070	1195	1122	1342	1270	746	700
Sprino_c26286_g11_i2|m.56998	374	477	535	501	557	514	444	327
Sprino_c28523_g3_i11|m.108796	75	78	76	61	98	86	59	62
Sprino_c8412_g1_i1|m.1824	54	74	206	133	75	66	223	174
Sprino_c27194_g1_i2|m.77970	43	53	68	55	73	60	47	41
Sprino_c28179_g2_i7|m.101317	65	67	138	82	149	125	142	155
Sprino_c25001_g2_i2|m.37709	50	71	59	53	26	24	97	60
Sprino_c14229_g1_i2|m.3871	10	16	30	26	10	7	43	49
Sprino_c28265_g3_i13|m.103206	106	152	148	114	161	122	106	88
Sprino_c26839_g2_i11|m.69872	146	188	209	180	234	189	143	140
Sprino_c29063_g11_i8|m.118965	104	137	150	103	165	127	90	80
Sprino_c24743_g1_i2|m.34932	2273	2983	3010	2821	3555	3614	2041	2003
Sprino_c28265_g3_i13|m.103207	159	192	207	148	198	165	173	129
Sprino_c23232_g2_i1|m.23259	49	59	104	78	119	127	216	185
Sprino_c26696_g9_i2|m.65960	151	219	211	189	214	270	143	138
Sprino_c28620_g1_i3|m.110650	2596	2959	3625	2887	3729	3426	2376	1943
Sprino_c28022_g18_i5|m.97827	210	207	343	247	396	262	277	180
Sprino_c13707_g1_i1|m.3225	17	35	41	38	26	19	54	42
Sprino_c27130_g16_i2|m.76621	126	187	233	133	305	197	150	133
Sprino_c28860_g9_i5|m.115464	42	56	72	49	61	66	45	34
Sprino_c22573_g1_i5|m.19686	209	243	297	243	286	228	233	175
Sprino_c24290_g1_i5|m.30758	22	22	35	33	35	31	38	23
Sprino_c67304_g1_i1|m.124746	1	1	0	1	1	0	0	0
Sprino_c26796_g9_i2|m.68846	2941	3757	3889	3625	3806	3753	2888	2530
Sprino_c27628_g1_i25|m.88547	513	666	621	575	543	553	398	412
Sprino_c26174_g12_i1|m.54648	42	65	182	125	38	41	142	104
Sprino_c25399_g4_i7|m.42388	131	162	128	107	260	233	127	88
Sprino_c27068_g2_i1|m.75361	672	733	780	660	731	709	534	459
Sprino_c18959_g1_i3|m.8558	127	174	192	133	183	168	97	101
Sprino_c28923_g8_i6|m.116699	219	197	253	167	302	332	173	154
Sprino_c26301_g2_i3|m.57221	51	41	54	33	60	51	49	35
Sprino_c28740_g2_i20|m.112907	100	117	159	154	180	135	186	138
Sprino_c20455_g1_i1|m.11662	504	595	626	607	599	582	474	382
Sprino_c28857_g12_i9|m.115393	204	263	204	163	152	176	247	183
Sprino_c28458_g2_i6|m.107162	1	1	4	1	1	1	12	9
Sprino_c25384_g1_i9|m.42169	16	9	13	9	11	5	8	13
Sprino_c25472_g1_i2|m.43194	84	89	120	82	242	218	106	74
Sprino_c27682_g1_i2|m.89840	552	731	761	645	939	787	535	462
Sprino_c27194_g19_i3|m.78014	24	29	34	26	39	31	21	18
Sprino_c24213_g1_i3|m.30146	59	70	88	97	94	63	59	55
Sprino_c28500_g2_i6|m.108137	31	38	39	45	54	39	27	24
Sprino_c25947_g10_i2|m.50358	82	94	109	78	88	75	79	55
Sprino_c25078_g1_i6|m.38505	2139	2528	2419	2125	2620	2189	1973	1688
Sprino_c24499_g1_i3|m.32590	6	7	7	4	8	3	3	8
Sprino_c69755_g1_i1|m.124808	489	516	634	555	359	351	692	549
Sprino_c24499_g1_i3|m.32591	67	109	139	109	119	134	94	80
Sprino_c28530_g4_i4|m.108942	275	302	316	277	333	350	230	268
Sprino_c20235_g1_i3|m.11018	0	1	4	4	1	0	9	5
Sprino_c28933_g9_i1|m.116793	1066	1321	1321	1145	1452	1421	908	775
Sprino_c28607_g3_i2|m.110300	1	0	2	0	7	14	0	0
Sprino_c21180_g1_i3|m.13969	608	763	738	739	594	651	671	573
Sprino_c20113_g3_i2|m.10816	237	264	320	285	346	292	231	214
Sprino_c27964_g16_i4|m.96359	134	163	163	156	186	144	106	79
Sprino_c22968_g1_i2|m.21637	9	20	22	22	13	11	25	17
Sprino_c15783_g1_i2|m.4857	40	46	218	150	117	94	129	105
Sprino_c24711_g2_i1|m.34578	1145	1226	1418	1193	1855	1844	1023	1033
Sprino_c20683_g1_i1|m.12381	159	164	227	168	226	260	240	214
Sprino_c24334_g2_i5|m.31083	2919	3433	4107	3504	4403	3922	2833	2495
Sprino_c28164_g1_i2|m.100950	95	112	109	117	76	67	132	145
Sprino_c25763_g4_i6|m.47109	157	200	246	206	223	227	230	183
Sprino_c25888_g2_i2|m.49263	503	805	759	710	782	844	678	620
Sprino_c14315_g1_i2|m.3993	1383	1667	1928	1672	1909	1829	1357	1101
Sprino_c25814_g1_i4|m.47966	100	125	111	82	55	57	87	74
Sprino_c69828_g1_i1|m.124821	636	791	933	808	898	739	645	495
Sprino_c20361_g1_i4|m.11376	178	258	288	208	259	224	203	163
Sprino_c4294_g1_i1|m.849	328	394	477	359	439	412	470	394
Sprino_c26407_g7_i1|m.59287	22	28	34	35	31	41	25	21
Sprino_c22151_g1_i2|m.17661	105	137	140	97	115	86	93	60
Sprino_c23336_g2_i4|m.23916	30	28	26	13	8	6	4	3
Sprino_c25967_g1_i2|m.50759	52	76	61	56	65	66	56	63
Sprino_c28041_g7_i6|m.98238	5	5	8	5	7	5	11	15
Sprino_c16019_g1_i1|m.5026	695	856	523	535	835	1060	365	272
Sprino_c26407_g7_i1|m.59289	23	26	34	15	46	26	16	17
Sprino_c22489_g1_i6|m.19302	244	292	444	341	348	338	326	296
Sprino_c21681_g1_i7|m.15523	253	349	314	265	295	239	284	247
Sprino_c24838_g1_i8|m.35907	417	526	555	504	652	558	450	334
Sprino_c24120_g1_i5|m.29443	598	766	762	793	635	606	761	511
Sprino_c25785_g3_i2|m.47506	23	36	31	15	37	28	30	15
Sprino_c26322_g1_i4|m.57637	9	18	16	20	12	11	12	22
Sprino_c27307_g4_i9|m.80988	67	92	114	94	107	79	67	66
Sprino_c16120_g1_i1|m.5223	125	121	177	146	184	157	149	117
Sprino_c27035_g8_i2|m.74588	721	839	1087	897	1217	970	758	661
Sprino_c27674_g9_i2|m.89621	291	336	482	421	555	517	511	461
Sprino_c70097_g1_i1|m.124883	1	7	7	9	1	6	3	6
Sprino_c25860_g1_i6|m.48779	27	28	49	31	56	30	39	15
Sprino_c24280_g2_i5|m.30708	267	335	337	316	369	377	265	223
Sprino_c27778_g2_i1|m.92234	682	788	909	795	791	663	725	554
Sprino_c24967_g2_i10|m.37347	401	473	557	496	629	573	540	460
Sprino_c20952_g2_i2|m.13242	753	855	906	805	762	709	673	549
Sprino_c26648_g4_i12|m.64844	21	44	37	30	60	30	39	30
Sprino_c23431_g2_i3|m.24436	102	132	149	135	132	141	145	130
Sprino_c26351_g11_i8|m.58130	162	185	130	114	281	185	109	78
Sprino_c27968_g3_i2|m.96432	109	126	134	101	151	143	87	95
Sprino_c26321_g17_i1|m.57606	330	413	451	382	368	359	335	271
Sprino_c26621_g9_i5|m.64210	94	112	131	96	150	127	101	65
Sprino_c17635_g1_i2|m.6379	427	525	654	556	485	458	709	595
Sprino_c16134_g1_i2|m.5265	54	65	76	80	76	71	61	63
Sprino_c28758_g9_i1|m.113249	170	214	228	203	271	215	197	158
Sprino_c21223_g1_i3|m.14090	237	266	330	288	267	239	288	255
Sprino_c28934_g1_i2|m.116816	338	448	553	391	572	476	422	299
Sprino_c25611_g6_i9|m.45130	657	792	885	799	955	839	683	518
Sprino_c23766_g2_i3|m.26736	145	166	126	119	183	141	100	75
Sprino_c14958_g2_i1|m.4459	0	1	1	1	1	0	3	0
Sprino_c29034_g1_i4|m.118423	4701	5976	6713	5622	7842	6644	4307	4087
Sprino_c71334_g1_i1|m.125086	0	2	0	1	0	0	1	1
Sprino_c27153_g2_i5|m.77070	61	67	100	78	85	69	76	63
Sprino_c22032_g3_i4|m.17128	103	155	171	140	174	166	124	87
Sprino_c27420_g1_i7|m.83758	1125	1315	1378	1307	1511	1523	1033	937
Sprino_c28600_g3_i12|m.110187	74	117	137	98	126	102	103	89
Sprino_c25227_g2_i6|m.40307	51	67	85	79	85	63	48	46
Sprino_c28957_g2_i3|m.117130	4	9	7	5	8	3	5	4
Sprino_c28600_g3_i12|m.110188	16	25	34	21	25	40	18	16
Sprino_c24266_g1_i5|m.30611	26	15	20	18	20	17	14	10
Sprino_c28990_g2_i4|m.117670	8	18	12	34	11	20	7	22
Sprino_c28904_g3_i6|m.116315	1340	1658	1512	1507	1630	1628	932	932
Sprino_c15809_g1_i1|m.4872	565	669	731	598	776	679	601	535
Sprino_c27904_g6_i4|m.95033	515	529	468	516	290	360	394	288
Sprino_c26169_g6_i14|m.54518	3	1	0	3	0	1	7	2
Sprino_c28455_g1_i6|m.107047	10	13	15	11	13	10	12	11
Sprino_c19343_g1_i2|m.9369	213	254	269	248	407	329	176	137
Sprino_c27393_g1_i3|m.83196	282	381	372	385	375	360	240	232
Sprino_c23369_g1_i3|m.24129	701	845	945	825	881	801	801	642
Sprino_c23124_g1_i2|m.22651	973	1393	1492	1416	1782	1649	1053	942
Sprino_c28024_g3_i10|m.97897	4427	5722	5221	5086	5943	6034	3814	3459
Sprino_c25433_g1_i5|m.42783	2	5	3	2	7	12	5	7
Sprino_c26154_g2_i10|m.54262	30	38	39	36	30	22	50	24
Sprino_c22973_g1_i2|m.21680	166	192	222	178	329	303	182	138
Sprino_c72227_g1_i1|m.125190	1	0	0	2	0	1	1	0
Sprino_c4796_g1_i2|m.1067	1141	1413	1352	1273	1163	1156	997	915
Sprino_c28008_g6_i5|m.97459	747	851	919	789	916	882	729	561
Sprino_c21761_g1_i3|m.15896	398	460	476	420	458	458	494	446
Sprino_c29104_g1_i3|m.119456	2	3	2	4	2	2	0	2
Sprino_c21467_g2_i1|m.14789	846	984	1028	931	1040	974	779	660
Sprino_c28004_g7_i1|m.97301	88	149	140	134	102	116	177	171
Sprino_c17749_g1_i4|m.6507	133	167	240	158	210	157	140	114
Sprino_c24128_g2_i1|m.29485	28	39	34	28	25	34	43	22
Sprino_c26209_g12_i6|m.55442	53	50	45	44	54	48	43	39
Sprino_c24586_g1_i3|m.33371	3358	2801	3214	3439	2399	3874	9003	7185
Sprino_c25966_g16_i1|m.50750	424	490	944	721	665	563	703	541
Sprino_c22079_g1_i2|m.17303	678	901	734	677	563	521	472	443
Sprino_c18730_g1_i3|m.8068	172	217	205	179	249	220	159	111
Sprino_c23715_g1_i4|m.26317	164	176	186	150	93	58	66	54
Sprino_c28648_g8_i2|m.111264	76	68	80	72	56	75	57	43
Sprino_c24813_g3_i1|m.35614	18	15	42	31	42	26	34	35
Sprino_c26434_g2_i10|m.60014	22	16	31	24	25	18	23	17
Sprino_c23254_g2_i4|m.23375	3953	4873	4430	3861	5984	5484	2601	2148
Sprino_c16240_g1_i3|m.5393	663	828	908	872	1064	1070	800	670
Sprino_c23582_g1_i1|m.25355	386	406	565	467	424	369	577	479
Sprino_c18080_g3_i2|m.6956	1	5	10	6	4	3	2	5
Sprino_c26177_g7_i5|m.54749	3956	4903	5546	4650	5321	4796	3872	3346
Sprino_c25706_g1_i3|m.46217	138	180	186	211	278	233	144	110
Sprino_c25748_g12_i3|m.46851	145	204	177	186	177	199	152	134
Sprino_c27851_g1_i2|m.93932	301	389	295	325	182	169	246	214
Sprino_c28305_g2_i6|m.104056	10466	13159	14842	12289	18669	16563	9677	9236
Sprino_c39474_g1_i1|m.122385	0	1	1	4	12	4	21	18
Sprino_c19231_g1_i2|m.9164	0	0	1	1	2	0	10	9
Sprino_c26756_g8_i4|m.67596	164	230	252	207	278	259	261	242
Sprino_c25130_g1_i8|m.39060	10	19	10	14	5	9	18	15
Sprino_c25753_g4_i1|m.46963	171	199	291	249	278	227	240	250
Sprino_c23582_g1_i1|m.25357	0	1	1	0	0	0	0	1
Sprino_c27510_g5_i8|m.85761	437	602	636	554	669	635	372	328
Sprino_c28673_g2_i3|m.111842	428	497	521	449	406	416	282	235
Sprino_c27194_g4_i4|m.77987	52	76	62	78	79	80	74	52
Sprino_c25414_g1_i4|m.42512	1287	1796	1747	1625	1607	1663	1242	1078
Sprino_c74892_g1_i1|m.125405	0	0	1	0	1	1	0	0
Sprino_c26583_g5_i5|m.63365	131	178	139	161	95	81	144	142
Sprino_c27865_g7_i5|m.94315	2767	3102	3994	2859	4732	3816	2598	2148
Sprino_c28562_g5_i2|m.109676	126	117	161	154	191	143	95	92
Sprino_c27428_g7_i1|m.83950	20	28	29	21	30	19	19	14
Sprino_c28450_g3_i5|m.106954	110	143	154	131	113	128	116	108
Sprino_c24904_g2_i4|m.36671	155	203	275	235	214	186	278	253
Sprino_c27395_g3_i6|m.83208	1117	1422	1453	1383	1330	1197	1205	854
Sprino_c24263_g2_i7|m.30589	178	196	260	200	276	232	220	168
Sprino_c26418_g13_i1|m.59561	982	1151	1437	1214	2338	1969	1228	1004
Sprino_c25608_g1_i2|m.45088	4	6	7	5	3	4	3	3
Sprino_c26512_g2_i13|m.61828	31	37	47	41	65	57	41	42
Sprino_c22346_g1_i5|m.18603	197	238	360	299	325	265	252	222
Sprino_c23281_g1_i2|m.23551	91	111	127	123	117	100	84	78
Sprino_c27681_g3_i3|m.89785	493	691	843	604	1094	764	495	475
Sprino_c11595_g1_i2|m.2567	1	1	3	4	1	0	5	13
Sprino_c25354_g1_i8|m.41765	24	22	23	22	31	24	20	23
Sprino_c27926_g2_i17|m.95557	72	97	103	75	127	81	88	50
Sprino_c24648_g1_i5|m.33927	319	373	383	392	433	443	379	326
Sprino_c26828_g10_i5|m.69634	314	362	453	383	491	522	364	284
Sprino_c27889_g10_i3|m.94768	174	252	224	203	180	253	164	155
Sprino_c23523_g1_i6|m.24943	10	12	12	9	12	15	6	5
Sprino_c24929_g1_i5|m.37005	84	87	87	77	60	49	78	70
Sprino_c26284_g1_i9|m.56967	2523	2908	3079	2813	3040	3152	2247	1827
Sprino_c25017_g1_i3|m.37849	10	10	13	8	14	7	8	5
Sprino_c24629_g1_i2|m.33681	55	93	86	104	64	68	100	59
Sprino_c17390_g1_i1|m.6070	100	108	119	122	357	388	200	136
Sprino_c24031_g2_i5|m.28770	130	139	172	129	145	144	106	81
Sprino_c4001_g1_i1|m.782	22	50	21	14	36	24	1	6
Sprino_c21835_g1_i3|m.16243	234	302	345	298	330	276	261	218
Sprino_c9135_g2_i1|m.2040	1	0	0	1	2	1	2	1
Sprino_c46774_g1_i1|m.122957	0	0	10	8	0	3	15	17
Sprino_c23496_g2_i1|m.24786	641	817	844	773	853	764	674	525
Sprino_c25384_g1_i9|m.42170	2801	3508	3357	3164	3942	3957	2251	2073
Sprino_c29053_g4_i2|m.118812	102	105	113	98	90	94	66	62
Sprino_c27895_g6_i1|m.94865	1743	2061	2281	1982	2693	2441	1808	1397
Sprino_c7215_g1_i1|m.1461	3	1	2	3	3	2	5	1
Sprino_c25211_g1_i8|m.40159	404	526	659	597	423	440	637	561
Sprino_c18088_g1_i1|m.6963	16	29	55	46	37	26	49	56
Sprino_c62715_g1_i1|m.124310	3	9	8	2	11	11	10	8
Sprino_c22287_g1_i2|m.18296	135	187	168	150	149	135	191	152
Sprino_c34997_g1_i1|m.121921	0	0	0	0	2	0	1	1
Sprino_c27351_g4_i6|m.82109	104	93	126	96	58	49	42	47
Sprino_c28809_g12_i3|m.114389	1	4	1	6	4	5	4	4
Sprino_c5939_g1_i1|m.1305	4366	5276	5487	5120	6632	6043	4751	4256
Sprino_c23441_g1_i3|m.24492	23	24	22	18	23	21	12	9
Sprino_c27853_g3_i3|m.93978	14	13	25	9	28	21	18	20
Sprino_c24179_g1_i7|m.29891	20	23	18	16	24	15	19	16
Sprino_c63888_g1_i1|m.124486	0	0	7	4	1	0	3	0
Sprino_c28148_g12_i3|m.100587	114	126	126	123	88	97	100	71
Sprino_c27911_g11_i7|m.95198	92	131	99	84	39	65	70	87
Sprino_c26416_g18_i1|m.59493	192	240	289	213	337	266	185	171
Sprino_c27627_g7_i8|m.88509	210	269	292	273	241	246	243	206
Sprino_c23072_g1_i7|m.22344	846	1055	1094	1025	1033	997	756	712
Sprino_c20878_g1_i2|m.13054	185	230	272	252	269	235	214	155
Sprino_c26954_g2_i7|m.72733	7	8	4	6	1	4	5	4
Sprino_c24750_g1_i9|m.35027	104	134	170	133	175	173	91	73
Sprino_c25737_g2_i4|m.46642	29	25	30	39	34	20	22	25
Sprino_c26076_g3_i1|m.52889	469	622	734	609	659	654	546	478
Sprino_c28882_g11_i2|m.115923	11	12	14	14	7	4	13	7
Sprino_c19812_g1_i2|m.10265	996	1341	1320	1221	1269	1211	893	829
Sprino_c24787_g1_i8|m.35356	1	1	2	0	1	2	1	0
Sprino_c28766_g3_i2|m.113533	5	13	6	5	5	3	14	2
Sprino_c12077_g1_i2|m.2731	0	0	13	5	2	1	20	11
Sprino_c3540_g1_i1|m.639	2	5	2	0	0	11	0	0
Sprino_c24017_g1_i3|m.28642	567	717	721	727	737	790	615	521
Sprino_c25967_g1_i2|m.50760	23	35	43	21	42	42	34	27
Sprino_c8408_g1_i1|m.1817	81	94	107	76	136	144	110	96
Sprino_c27385_g14_i1|m.83059	16	24	23	21	19	11	30	18
Sprino_c26170_g3_i15|m.54563	281	309	345	293	341	362	218	236
Sprino_c25431_g2_i6|m.42753	18	27	26	18	29	42	15	22
Sprino_c27687_g9_i5|m.89968	120	137	166	145	189	151	134	115
Sprino_c28140_g1_i6|m.100491	556	681	732	627	704	785	575	514
Sprino_c27889_g8_i2|m.94758	37	31	41	24	27	31	21	20
Sprino_c27208_g2_i1|m.78326	79	111	161	125	81	78	144	119
Sprino_c25578_g2_i1|m.44648	0	0	2	2	1	0	0	0
Sprino_c24221_g2_i8|m.30212	12	22	26	25	28	27	20	19
Sprino_c27329_g2_i3|m.81509	21	13	33	27	38	20	42	21
Sprino_c5174_g1_i1|m.1181	1205	1410	2487	1770	2431	1976	3552	2583
Sprino_c28828_g4_i4|m.114786	36	42	61	35	62	46	42	28
Sprino_c25263_g6_i9|m.40788	12	17	20	12	23	23	16	9
Sprino_c21375_g1_i5|m.14505	102	78	101	103	99	61	109	81
Sprino_c28611_g18_i7|m.110392	321	348	343	336	389	385	260	216
Sprino_c24221_g2_i8|m.30215	0	0	2	4	1	0	0	0
Sprino_c25379_g2_i2|m.42114	164	185	249	215	262	200	211	185
Sprino_c23030_g1_i7|m.22104	6	4	12	5	11	8	7	6
Sprino_c14148_g1_i1|m.3775	129	161	209	146	196	126	61	37
Sprino_c28341_g2_i1|m.104845	115	124	151	133	159	134	105	82
Sprino_c16335_g1_i3|m.5502	423	579	658	564	636	564	522	416
Sprino_c25824_g2_i2|m.48104	160	254	249	182	228	202	131	127
Sprino_c26700_g4_i2|m.66003	2046	2245	2712	2246	2620	2302	1914	1708
Sprino_c26386_g6_i1|m.58800	40	45	54	45	76	78	46	37
Sprino_c25901_g1_i2|m.49433	74	93	107	73	108	121	109	84
Sprino_c27075_g1_i2|m.75426	122	124	175	119	88	80	264	182
Sprino_c27184_g1_i15|m.77804	2	5	3	0	3	1	3	4
Sprino_c29012_g2_i1|m.118060	57	86	92	103	96	127	84	52
Sprino_c27344_g4_i2|m.81930	165	183	203	183	203	227	169	137
Sprino_c22514_g2_i1|m.19411	137	116	91	83	63	43	58	57
Sprino_c26224_g4_i5|m.55791	104	130	140	110	121	125	99	89
Sprino_c22060_g1_i7|m.17222	273	333	389	286	403	350	249	199
Sprino_c20493_g1_i4|m.11782	421	525	645	474	671	661	457	393
Sprino_c27276_g8_i2|m.80116	355	393	483	377	455	456	381	312
Sprino_c27629_g7_i14|m.88566	143	179	187	151	219	206	149	130
Sprino_c20043_g1_i2|m.10708	135	163	186	144	151	137	114	119
Sprino_c26385_g5_i11|m.58767	32	45	44	33	40	42	36	36
Sprino_c26385_g5_i11|m.58768	17	28	44	25	24	22	25	31
Sprino_c23214_g1_i3|m.23175	49	67	104	83	192	169	84	63
Sprino_c25473_g1_i1|m.43201	426	469	568	497	367	374	364	355
Sprino_c24807_g2_i2|m.35547	8	9	8	8	5	1	8	6
Sprino_c27660_g1_i1|m.89248	162	188	230	222	173	192	263	221
Sprino_c22144_g2_i5|m.17630	63	71	100	64	136	78	109	61
Sprino_c25332_g1_i6|m.41523	238	253	314	239	314	253	246	165
Sprino_c25600_g2_i14|m.45040	57	77	70	61	71	55	53	31
Sprino_c25983_g2_i7|m.50976	111	134	149	123	149	130	101	81
Sprino_c28727_g1_i7|m.112679	794	1007	1229	1023	1013	855	813	691
Sprino_c26543_g8_i1|m.62468	29	55	61	42	47	61	47	45
Sprino_c24635_g3_i7|m.33843	502	606	622	510	956	721	413	322
Sprino_c25262_g1_i3|m.40770	51	85	93	76	91	62	63	53
Sprino_c11107_g1_i2|m.2437	0	0	1	0	0	1	0	3
Sprino_c25983_g2_i7|m.50978	62	80	46	57	10	13	61	40
Sprino_c17949_g1_i1|m.6732	409	487	433	370	693	541	352	286
Sprino_c27560_g7_i3|m.87056	257	293	370	268	404	336	262	182
Sprino_c25923_g2_i7|m.49855	648	720	849	789	728	697	622	571
Sprino_c21328_g1_i2|m.14382	360	419	524	454	528	450	375	296
Sprino_c9110_g1_i2|m.2035	519	638	680	561	745	685	480	413
Sprino_c28616_g8_i7|m.110608	224	241	286	317	215	224	222	205
Sprino_c20605_g1_i1|m.12123	237	290	369	235	343	375	207	246
Sprino_c67948_g1_i1|m.124771	0	0	0	0	1	0	0	1
Sprino_c25771_g1_i4|m.47265	15	19	25	19	23	17	21	16
Sprino_c26763_g2_i7|m.67728	10	14	12	8	12	7	12	10
Sprino_c22409_g1_i2|m.18910	45	50	76	58	69	80	39	40
Sprino_c28081_g5_i3|m.99135	59	73	72	60	85	84	56	39
Sprino_c16116_g1_i1|m.5217	3	5	8	4	6	5	8	7
Sprino_c27444_g10_i11|m.84313	6	4	5	6	8	7	9	6
Sprino_c27701_g3_i1|m.90261	7	12	13	13	11	10	6	6
Sprino_c26763_g2_i7|m.67729	8	17	20	16	20	13	18	15
Sprino_c23029_g1_i3|m.22094	1027	1157	889	866	1247	1185	627	389
Sprino_c28081_g5_i3|m.99137	13	24	20	22	35	27	9	11
Sprino_c27376_g5_i10|m.82824	348	459	500	427	455	437	404	324
Sprino_c28710_g7_i3|m.112482	13	13	14	11	14	22	18	10
Sprino_c21984_g1_i2|m.16945	97	127	132	103	148	123	133	100
Sprino_c26911_g2_i1|m.71729	1432	1766	1907	1763	1767	1845	1386	1233
Sprino_c28295_g11_i2|m.103826	307	366	276	318	211	214	138	113
Sprino_c37877_g1_i1|m.122123	3	2	2	3	1	2	1	5
Sprino_c46877_g1_i1|m.122969	1	0	0	0	0	0	3	0
Sprino_c25288_g1_i2|m.41038	8	20	14	7	65	66	33	24
Sprino_c26195_g3_i7|m.55146	1520	1797	2006	1785	2269	2280	1460	1387
Sprino_c24928_g3_i2|m.36988	389	488	594	488	601	504	459	402
Sprino_c24704_g1_i5|m.34487	637	917	1010	912	931	846	804	646
Sprino_c27523_g12_i4|m.86109	366	461	421	386	383	372	336	277
Sprino_c24321_g1_i8|m.30969	167	203	264	216	189	179	199	166
Sprino_c28425_g3_i9|m.106473	537	670	1021	943	719	671	629	669
Sprino_c24863_g1_i11|m.36172	914	1215	1147	1013	970	784	752	603
Sprino_c25228_g1_i17|m.40332	159	224	305	257	263	255	228	184
Sprino_c22718_g1_i4|m.20223	151	185	207	181	223	198	167	131
Sprino_c28409_g2_i5|m.106172	255	282	306	312	337	340	269	284
Sprino_c19277_g1_i3|m.9266	277	257	316	228	348	362	130	95
Sprino_c26085_g1_i1|m.52973	132	145	161	161	134	147	128	87
Sprino_c28268_g1_i1|m.103265	2116	2443	2686	2181	3146	2817	1782	1549
Sprino_c18205_g2_i1|m.7162	71	74	59	68	3	4	18	13
Sprino_c27115_g3_i8|m.76337	50	37	50	42	37	44	32	25
Sprino_c28196_g1_i4|m.101807	312	394	420	356	263	252	284	229
Sprino_c25519_g18_i6|m.43812	507	552	581	591	551	579	451	435
Sprino_c8295_g1_i1|m.1720	607	749	857	623	679	575	551	456
Sprino_c22412_g2_i3|m.18927	1196	1307	1584	1379	1664	1518	1222	1167
Sprino_c16709_g1_i1|m.5768	0	0	14	8	4	0	0	1
Sprino_c20678_g1_i1|m.12355	113	163	135	129	101	97	138	121
Sprino_c22322_g2_i1|m.18499	87	111	183	154	143	122	150	120
Sprino_c22259_g1_i4|m.18158	13	8	11	8	10	6	4	4
Sprino_c2171_g1_i1|m.493	281	330	348	321	425	475	329	303
Sprino_c20453_g2_i2|m.11643	613	853	945	770	1020	790	704	610
Sprino_c28353_g5_i1|m.105152	1258	1423	1564	1409	1620	1446	1086	960
Sprino_c20489_g4_i3|m.11774	534	712	712	637	842	824	639	504
Sprino_c20500_g1_i1|m.11790	1	0	1	1	1	2	2	1
Sprino_c21443_g1_i3|m.14729	318	402	370	344	344	423	282	289
Sprino_c27457_g1_i8|m.84553	7	7	10	8	9	8	15	10
Sprino_c25470_g2_i3|m.43178	139	187	224	181	216	255	205	163
Sprino_c23209_g1_i3|m.23130	76	104	145	108	122	113	150	133
Sprino_c24721_g2_i5|m.34686	64	73	87	70	87	73	59	75
Sprino_c27772_g14_i2|m.92063	327	476	519	540	259	302	349	329
Sprino_c25045_g1_i1|m.38182	47004	61276	55547	52119	63027	71425	33753	34138
Sprino_c22040_g3_i5|m.17153	215	281	319	283	389	363	227	191
Sprino_c27345_g3_i6|m.81980	3075	3228	2620	2614	2585	2288	1819	1383
Sprino_c28445_g10_i5|m.106883	343	428	486	357	488	439	298	327
Sprino_c27772_g14_i2|m.92064	248	333	364	320	170	169	226	193
Sprino_c28128_g1_i7|m.100185	8	14	9	12	3	5	11	9
Sprino_c29133_g3_i14|m.119977	93	83	96	105	109	118	84	72
Sprino_c27362_g1_i7|m.82505	721	863	846	769	908	884	695	538
Sprino_c25084_g1_i1|m.38556	137	176	119	102	131	134	60	48
Sprino_c28662_g1_i12|m.111572	2	4	4	3	8	1	6	2
Sprino_c28505_g7_i8|m.108315	23	23	16	14	25	25	27	8
Sprino_c30638_g1_i1|m.121556	283	282	391	325	518	411	300	233
Sprino_c25518_g1_i4|m.43760	105	146	140	89	380	434	80	67
Sprino_c29087_g1_i8|m.119263	655	766	1001	779	1009	857	660	579
Sprino_c63667_g1_i1|m.124452	1	0	3	0	1	2	0	0
Sprino_c14599_g1_i2|m.4270	24	23	42	36	146	97	129	109
Sprino_c28009_g6_i2|m.97494	83	98	106	81	88	84	59	53
Sprino_c27459_g2_i4|m.84618	574	835	786	722	884	783	528	482
Sprino_c18573_g1_i4|m.7808	14	13	46	29	9	8	12	20
Sprino_c10605_g1_i1|m.2261	488	562	511	544	128	81	534	489
Sprino_c23243_g3_i7|m.23304	1	6	8	6	2	3	3	4
Sprino_c28201_g2_i6|m.101875	298	332	378	318	288	268	315	266
Sprino_c28878_g6_i3|m.115795	566	914	928	815	661	719	967	889
Sprino_c27408_g12_i3|m.83556	366	470	595	504	545	557	443	385
Sprino_c25979_g17_i2|m.50891	209	234	267	215	221	181	187	143
Sprino_c28125_g2_i28|m.100137	167	179	213	172	234	227	181	128
Sprino_c24829_g2_i4|m.35794	570	747	701	711	706	883	457	557
Sprino_c26949_g9_i1|m.72549	2115	2618	2882	2216	3361	2939	1811	1724
Sprino_c16391_g1_i1|m.5549	389	446	640	516	661	537	475	371
Sprino_c27163_g1_i5|m.77372	179	187	263	240	168	159	176	200
Sprino_c28638_g6_i1|m.111060	2219	2997	3088	2856	2878	3126	2238	2066
Sprino_c28428_g8_i5|m.106560	60	76	95	78	97	106	84	76
Sprino_c27282_g2_i8|m.80288	23	40	46	43	35	31	38	46
Sprino_c27163_g16_i2|m.77400	60	80	63	73	64	80	51	58
Sprino_c21787_g1_i3|m.16030	378	414	428	418	560	607	322	344
Sprino_c25671_g1_i2|m.45845	234	279	237	247	180	160	215	157
Sprino_c26508_g3_i3|m.61729	196	218	225	156	225	173	179	139
Sprino_c27875_g3_i6|m.94517	813	1096	1141	1004	1269	1200	875	799
Sprino_c28112_g7_i2|m.99793	454	515	590	487	531	375	433	297
Sprino_c27109_g4_i5|m.76182	323	410	468	435	547	539	391	339
Sprino_c26232_g1_i7|m.55953	536	594	569	528	512	464	562	471
Sprino_c19446_g2_i1|m.9525	8	12	13	20	7	9	6	4
Sprino_c28496_g12_i25|m.108052	92	96	99	104	70	77	60	54
Sprino_c28829_g2_i16|m.114827	10	19	10	15	20	9	10	8
Sprino_c25033_g1_i5|m.38071	248	308	284	271	210	200	337	262
Sprino_c28425_g6_i15|m.106483	309	375	472	385	492	469	361	325
Sprino_c17529_g1_i1|m.6260	101	103	54	35	89	69	52	29
Sprino_c25033_g1_i5|m.38072	77	75	107	74	70	88	100	81
Sprino_c26715_g11_i2|m.66519	1928	2347	2301	2106	1924	1765	1685	1430
Sprino_c27616_g9_i3|m.88311	550	612	786	709	780	750	609	513
Sprino_c27670_g6_i3|m.89504	68	116	111	104	121	108	74	61
Sprino_c26378_g1_i2|m.58632	35	70	129	113	20	24	60	69
Sprino_c26122_g1_i1|m.53668	217	198	248	222	254	247	212	204
Sprino_c27960_g1_i20|m.96252	23	33	24	28	22	22	24	11
Sprino_c27803_g9_i6|m.92775	450	504	651	529	665	540	446	407
Sprino_c26374_g14_i1|m.58532	3	8	15	13	22	21	3	4
Sprino_c27665_g3_i2|m.89397	1997	2490	2594	2341	2737	2480	2084	1829
Sprino_c25813_g1_i7|m.47955	37	29	41	24	33	21	19	15
Sprino_c22317_g2_i1|m.18453	208	292	347	264	375	357	444	376
Sprino_c8136_g1_i1|m.1628	588	680	710	672	681	644	540	456
Sprino_c27978_g5_i1|m.96833	6	9	11	6	6	9	4	2
Sprino_c26160_g1_i3|m.54329	1107	1309	1284	1221	1146	1182	1037	946
Sprino_c23355_g1_i1|m.24044	460	518	690	554	706	596	578	527
Sprino_c26658_g4_i4|m.65088	1190	1332	1197	1338	1065	1553	991	1071
Sprino_c26599_g6_i2|m.63661	255	309	386	304	466	326	262	219
Sprino_c24503_g1_i1|m.32619	22	47	46	36	42	38	35	16
Sprino_c26415_g1_i1|m.59456	342	403	455	395	339	295	346	247
Sprino_c24833_g1_i2|m.35833	1042	1318	1345	1139	1218	1166	775	646
Sprino_c18599_g1_i1|m.7846	1221	1514	2078	1667	2916	2412	1647	1382
Sprino_c26823_g6_i7|m.69510	95	108	134	105	147	182	116	82
Sprino_c26616_g9_i4|m.64086	418	454	396	330	395	379	463	369
Sprino_c27252_g4_i6|m.79413	120	122	157	116	118	116	119	108
Sprino_c26616_g9_i4|m.64087	60	57	53	42	51	50	78	54
Sprino_c29055_g5_i13|m.118842	1	1	2	0	2	4	1	1
Sprino_c21234_g3_i2|m.14125	356	395	480	398	448	445	362	312
Sprino_c22245_g1_i2|m.18063	88	95	128	101	145	101	90	66
Sprino_c27019_g2_i1|m.74204	30	38	52	45	37	39	59	38
Sprino_c16504_g1_i1|m.5640	4	4	3	2	0	0	1	1
Sprino_c23073_g1_i2|m.22346	14	22	29	26	29	37	26	21
Sprino_c28248_g5_i6|m.102799	4	2	4	6	4	10	33	35
Sprino_c22324_g1_i2|m.18504	8	4	2	4	6	4	1	1
Sprino_c25355_g2_i13|m.41786	28	40	45	24	36	44	35	26
Sprino_c12215_g1_i1|m.2783	0	2	37	25	2	2	10	14
Sprino_c23852_g1_i3|m.27320	1	5	11	4	12	11	9	5
Sprino_c27366_g1_i2|m.82600	40	65	31	13	22	7	3	5
Sprino_c28128_g8_i1|m.100203	325	344	438	368	503	456	380	292
Sprino_c29051_g10_i6|m.118757	797	926	1138	1017	1213	1043	823	724
Sprino_c27283_g7_i2|m.80306	25	29	29	26	40	17	31	25
Sprino_c25039_g1_i6|m.38156	57	72	92	63	102	62	59	45
Sprino_c21043_g1_i1|m.13501	117	152	117	131	132	124	94	87
Sprino_c27283_g7_i2|m.80307	186	241	266	217	286	246	178	151
Sprino_c24788_g1_i3|m.35359	62	87	96	79	190	180	83	60
Sprino_c25266_g2_i5|m.40825	328	408	494	444	536	440	428	327
Sprino_c26002_g4_i4|m.51345	378	468	494	413	523	535	434	403
Sprino_c28556_g13_i6|m.109474	23	29	51	18	38	38	29	34
Sprino_c6177_g2_i1|m.1330	0	1	0	0	0	0	1	0
Sprino_c50793_g1_i1|m.123347	7	6	7	6	5	4	9	17
Sprino_c28204_g6_i13|m.101969	136	258	271	200	273	179	163	128
Sprino_c17487_g1_i3|m.6187	6	2	4	2	6	4	2	1
Sprino_c19560_g3_i1|m.9698	83	110	187	163	138	108	204	138
Sprino_c26002_g4_i4|m.51346	81	94	120	99	120	92	97	77
Sprino_c24089_g3_i4|m.29238	18	22	22	30	23	30	12	10
Sprino_c26660_g1_i3|m.65126	22	28	41	36	44	50	32	28
Sprino_c23726_g1_i3|m.26410	18	28	43	18	29	30	25	22
Sprino_c28598_g1_i4|m.110132	1219	1525	1649	1419	1450	1403	1253	1048
Sprino_c17621_g1_i1|m.6353	83	98	108	90	162	163	107	94
Sprino_c26740_g3_i4|m.67111	274	297	310	230	332	318	227	140
Sprino_c26450_g15_i7|m.60429	25	25	36	20	14	8	28	18
Sprino_c23320_g3_i3|m.23801	409	486	511	470	610	560	359	273
Sprino_c1125_g1_i1|m.304	79	91	108	94	48	51	148	121
Sprino_c26130_g12_i2|m.53811	134	185	164	174	160	154	145	104
Sprino_c17163_g1_i2|m.5977	1585	1885	2106	2135	1402	1503	2006	1725
Sprino_c27083_g1_i2|m.75581	11	6	18	14	7	8	8	7
Sprino_c23925_g1_i5|m.27892	17	9	34	17	32	19	9	13
Sprino_c8345_g1_i1|m.1774	362	525	428	392	429	393	295	281
Sprino_c28643_g4_i3|m.111170	12	16	18	18	5	9	14	20
Sprino_c22794_g2_i1|m.20695	211	269	352	307	440	419	393	340
Sprino_c26489_g2_i5|m.61164	446	595	631	550	654	571	474	408
Sprino_c22768_g1_i2|m.20580	829	1026	919	876	1154	1247	781	668
Sprino_c27947_g15_i1|m.95953	8665	10415	10152	9131	10247	9737	6863	6082
Sprino_c24065_g2_i5|m.29061	186	259	247	242	166	186	221	202
Sprino_c26038_g1_i5|m.52236	17	22	36	22	16	12	10	22
[truncated: 46,555 more rows]
