# Supplementary material for: The evolution of inflorescence diversity in the nightshades and heterochrony during meristem maturation
Source: HighWire-hosted journal article supplement (doi:10.1101/gr.207837.116), 2016-11-07
Supplement: Supplemental_Table_S6.xlsx [file Supplemental_Table_S6.xlsx]

## Sheet: S. lycopersicum
geneid	EVM1	EVM2	MVM1	MVM2	LVM1	LVM2	TM1	TM2	FM1	FM2	SIM1	SIM2
Solyc00g005000.2.1	0	0.0343178	0	0	0	0	0	0	0	0	0	0
Solyc00g005020.1.1	0	0	0	0	0	0	0	0	0	0	0	0
Solyc00g005040.2.1	0.37684	0.446132	0.623819	0.373488	0.424266	0.328601	0.114403	0.444839	0	0.202856	0.0856779	0.47102
Solyc00g005050.2.1	28.0746	28.827	31.035	23.9033	20.5769	25.7623	26.1411	25.3855	21.6197	21.5607	24.2469	21.0075
Solyc00g005060.1.1	0	0	0	0	0	0	0	0	0	0	0	0
Solyc00g005070.1.1	0	0	0	0	0	0	0	0	0	0	0	0
Solyc00g005080.1.1	0	0	0	0	0	0	0	0	0	0	0	0
Solyc00g005090.1.1	0	0	0	0	0	0	0	0	0	0	0	0
Solyc00g005100.1.1	0	0	0	0	0	0	0	0	0	0	0	0
Solyc00g005110.1.1	0	0	0	0	0	0	0	0	0	0	0	0
Solyc00g005120.1.1	0	0	0	0	0	0	0	0	0	0	0	0
Solyc00g005130.1.1	0	0	0	0	0	0	0	0	0	0	0	0
Solyc00g005140.1.1	0	0	0	0	0	0	0	0	0	0	0	0
Solyc00g005150.1.1	0	0	0	0	0	0	0	0	0	0	0	0
Solyc00g005160.1.1	0	0	0	0	0	0	0	0	0	0	0	0
Solyc00g005170.1.1	0	0	0	0	0	0	0	0	0	0	0	0
Solyc00g005180.1.1	0.37684	0.617721	1.09168	0.112047	0.848531	0.328601	0.171604	0.741399	0.22061	0.231836	0	0.157007
Solyc00g005280.1.1	0	0	0	0	0	0	0	0	0	0	0	0
Solyc00g005420.1.1	0	0	0	0	0	0	0	0	0	0	0	0
Solyc00g005430.1.1	0	0	0	0	0	0	0	0	0	0	0	0
Solyc00g005440.1.1	0	0	0	0	0	0	0.0572014	0	0	0.0289795	0	0
Solyc00g005450.1.1	0	0	0	0	0	0	0	0	0	0	0	0
Solyc00g005460.1.1	0	0	0	0	0	0	0	0	0	0	0	0
Solyc00g005470.1.1	0	0	0	0	0	0	0	0	0	0	0	0
Solyc00g005480.1.1	0	0	0	0	0	0	0	0	0	0	0	0
Solyc00g005490.1.1	0	0	0	0	0	0	0	0	0	0	0	0
Solyc00g005840.2.1	21.5741	21.6889	19.0265	18.6744	15.8039	17.4158	16.0164	15.6287	17.5385	15.1563	15.2507	12.8745
Solyc00g005850.1.1	0	0	0	0	0	0	0	0	0	0	0	0
Solyc00g005860.1.1	0	0	0	0	0	0	0	0	0	0	0	0
Solyc00g005870.1.1	0	0	0	0	0	0	0	0	0	0	0	0
Solyc00g005880.1.1	0	0	0	0	0	0	0	0	0	0	0	0
Solyc00g005890.2.1	0	0.30886	0.155955	0.0746977	0.106066	0.0657202	0.114403	0.0889678	0.772133	0.637548	0.342712	0.219809
Solyc00g005900.1.1	0	0	0	0	0	0	0	0	0	0	0	0
Solyc00g005980.1.1	0	0	0	0	0	0	0	0	0	0	0	0
Solyc00g006010.1.1	0	0	0	0	0	0	0	0	0	0	0	0
Solyc00g006020.1.1	0	0	0	0	0	0	0	0	0	0	0	0
Solyc00g006050.1.1	0	0	0	0.0373488	0	0	0	0	0	0	0	0
Solyc00g006090.1.1	0	0	0	0	0	0	0	0	0	0	0	0
Solyc00g006170.1.1	0	0	0	0	0	0	0	0	0	0	0	0
Solyc00g006250.1.1	0	0	0	0	0	0	0	0	0	0	0	0
Solyc00g006470.1.1	174.948	201.48	181.375	250.2	140.326	281.742	261.353	104.181	297.161	233.227	270.485	112.511
Solyc00g006480.1.1	0	0	0	0	0	0	0	0	0	0	0	0
Solyc00g006490.2.1	67.266	81.0587	73.7666	88.0686	71.2766	78.9957	79.7388	75.9192	68.6096	67.2324	65.8863	66.3824
Solyc00g006500.1.1	0	0	0	0	0	0	0	0	0	0	0	0
Solyc00g006510.1.1	0	0	0	0	0	0	0	0	0	0	0	0
Solyc00g006520.1.1	0	0	0	0	0	0	0	0	0	0	0	0
Solyc00g006530.1.1	0	0	0	0	0	0	0	0	0	0	0	0
Solyc00g006540.1.1	0	0	0	0	0	0	0	0	0	0	0	0
Solyc00g006550.1.1	0	0	0	0	0	0	0	0	0	0	0	0
Solyc00g006560.1.1	0	0	0	0	0	0	0	0	0	0	0	0
Solyc00g006570.1.1	0	0	0	0	0	0	0	0	0	0	0	0
Solyc00g006590.1.1	0	0	0	0	0	0	0	0	0	0	0	0
Solyc00g006600.1.1	0	0	0	0	0	0	0	0	0	0	0	0
Solyc00g006630.1.1	0	0	0	0	0	0	0	0	0	0	0	0
Solyc00g006650.1.1	0	0	0	0	0	0	0	0	0	0	0	0
Solyc00g006660.1.1	0	0	0	0	0	0	0	0	0	0	0	0
Solyc00g006670.2.1	0	0	0	0	0	0	0	0	0	0.0289795	0	0
Solyc00g006680.1.1	1.03631	1.5443	1.40359	1.6807	0.954598	1.57728	2.11645	0.771055	1.21335	1.56489	1.19949	0.72223
Solyc00g006690.2.1	116.349	129.79	75.1702	123.662	52.2907	113.959	119.951	63.3451	99.7155	212.101	124.747	62.9282
Solyc00g006700.1.1	0	0	0	0	0	0	0	0	0	0	0	0
Solyc00g006800.2.1	127.56	121.211	109.324	113.54	120.385	120.662	116.977	117.2	138.653	138.435	125.433	143.787
Solyc00g006810.2.1	14.6026	15.0998	14.5038	12.5492	8.80351	12.0268	11.4975	11.0617	14.2293	12.2293	11.1381	10.7078
Solyc00g006820.2.1	66.3239	68.7386	53.9604	52.1763	54.0939	54.0877	48.7356	47.064	56.9173	56.9736	42.4106	41.7951
Solyc00g006830.2.1	82.7164	88.334	66.4367	88.33	75.6253	85.8306	74.9911	79.211	73.2424	74.7381	76.2534	84.0299
Solyc00g006840.2.1	0	0	0	0	0	0	0	0.0296559	0	0	0	0
Solyc00g006850.1.1	0	0	0	0	0	0	0	0	0	0	0	0
Solyc00g006860.1.1	0	0	0	0	0	0	0	0	0	0	0	0
Solyc00g006870.1.1	0	0	0	0	0	0	0	0	0	0	0	0
Solyc00g006880.1.1	0	0	0	0	0	0	0	0	0	0	0	0
Solyc00g006890.1.1	0	0	0	0	0	0	0	0	0	0	0	0
Solyc00g006900.1.1	0	0	0	0	0	0	0	0	0	0	0	0
Solyc00g007000.1.1	0	0.240225	0.155955	0.0373488	0.106066	0.197161	0.171604	0.0889678	0.110305	0.144897	0.0856779	0.219809
Solyc00g007010.2.1	22.3278	21.6889	14.1919	19.272	16.6524	17.8759	18.6477	16.5184	19.4136	19.706	21.5052	21.9809
Solyc00g007020.1.1	0	0	0	0	0	0	0	0	0	0	0	0
Solyc00g007030.1.1	0	0	0	0	0	0	0	0	0	0	0	0
Solyc00g007040.1.1	0	0	0	0	0	0	0	0	0	0	0	0
Solyc00g007050.1.1	0	0	0	0	0	0	0	0	0	0	0	0
Solyc00g007060.2.1	16.9578	19.6984	18.4027	16.4335	17.501	16.2329	16.9316	18.4757	20.1858	14.4318	16.3645	17.9615
Solyc00g007070.2.1	145.366	163.318	165	167.659	145.205	159.634	163.253	161.892	143.286	140.377	145.653	143.504
Solyc00g007080.2.1	7.15996	6.00562	6.23819	5.15414	5.40939	6.57202	7.26458	7.32502	5.84615	5.10039	6.5972	7.03389
Solyc00g007090.2.1	11.8705	14.036	15.9074	11.9516	13.7886	12.5526	10.9255	12.4555	15.4427	14.3448	12.766	12.6547
Solyc00g007100.2.1	13.001	14.0017	13.724	12.9227	12.4098	11.5668	14.0716	12.6631	11.9129	12.8379	14.4796	12.7803
Solyc00g007110.2.1	8.76154	8.099	7.01797	11.2793	10.3945	8.21502	8.1226	9.31197	6.61829	8.6069	7.28263	10.8963
Solyc00g007120.2.1	22.9873	20.0759	21.5218	20.6913	27.6833	20.7676	24.7682	25.771	22.5022	17.4746	20.9054	21.9495
Solyc00g007130.2.1	1.13052	0.686356	0.935729	1.19516	0.318199	0.460041	0.457611	0.830367	1.10305	0.463672	0.856779	0.565224
Solyc00g007140.1.1	4.33366	1.99043	3.1191	1.49395	4.24266	2.36593	2.28806	2.4911	2.97823	2.86897	3.34144	3.01453
Solyc00g007150.2.1	6.31207	6.52038	7.48583	6.01316	6.89432	7.36066	7.951	9.04506	5.95646	5.651	5.39771	5.30682
Solyc00g007160.1.1	0.56526	0.343178	0.155955	0.298791	0.636398	0.657202	0.629216	0.711743	0.661829	0.869384	0.342712	0.973441
Solyc00g007170.1.1	0.47105	0.411814	0.623819	0.485535	0.424266	0.788642	0.743619	1.51245	0.992743	0.985302	1.02814	0.942039
Solyc00g007180.1.1	0	0	0	0	0	0	0	0	0	0	0	0
Solyc00g007190.2.1	1.97841	1.64725	0.779774	2.24093	1.69706	1.77444	2.11645	1.98695	1.54427	2.28938	1.88491	1.44446
Solyc00g007200.2.1	22.1394	26.2188	27.9159	24.1647	21.6375	20.9647	17.332	19.8398	15.8839	16.5473	18.7635	18.7466
Solyc00g007210.1.1	0	0	0	0	0	0	0	0	0	0	0	0
Solyc00g007220.2.1	3.48577	3.80928	5.30246	3.54814	5.09119	3.81177	5.54854	3.67734	5.84615	4.81059	4.19822	3.73676
Solyc00g007230.1.1	0	0	0	0	0	0	0	0	0	0	0	0
Solyc00g007240.1.1	0	0	0	0	0	0	0	0	0	0	0	0
Solyc00g007250.1.1	0	0	0	0	0	0	0	0	0	0	0	0
Solyc00g007260.2.1	65.5702	70.3515	72.8309	72.6061	63.2156	63.2885	61.1483	72.3605	59.5646	64.6822	55.605	53.2252
Solyc00g007270.2.1	103.819	108.65	104.178	113.055	108.082	98.8432	113.259	109.282	137.881	151.012	132.287	145.482
Solyc00g007290.1.1	0	0	0	0	0	0	0	0	0	0	0	0
Solyc00g007300.2.1	6.78312	8.44218	6.5501	7.80591	5.30332	7.1635	8.29421	7.71055	5.62554	5.94079	6.51152	6.12326
Solyc00g007310.1.1	0	0	0	0	0	0	0	0	0	0	0	0
Solyc00g007320.1.1	0	0	0	0	0	0	0	0	0	0	0	0
Solyc00g007330.1.1	0	0	0	0	0	0	0	0	0	0	0	0
Solyc00g007340.1.1	0	0	0	0	0	0	0	0	0	0	0	0
Solyc00g007350.1.1	0	0	0	0	0	0	0	0	0	0	0	0
Solyc00g007450.1.1	0	0	0	0	0	0	0	0	0	0	0	0
Solyc00g007550.1.1	0.18842	0.0343178	0.155955	0.0373488	0	0	0.114403	0.0889678	0	0	0	0
Solyc00g007560.1.1	0	0	0	0	0	0	0	0	0	0	0	0
Solyc00g007570.1.1	0	0	0	0	0	0	0	0	0	0	0	0
Solyc00g007580.1.1	0	0	0	0	0	0	0	0	0	0	0	0
Solyc00g007590.1.1	0	0	0	0	0	0	0	0	0	0	0	0
Solyc00g007600.1.1	0.37684	0.274542	0	0.112047	0	0.13144	0.286007	0.14828	0.551524	0.115918	0.171356	0.157007
Solyc00g007610.1.1	0	0	0	0	0	0	0	0	0	0	0	0
Solyc00g007910.1.1	0	0	0	0	0	0	0	0	0	0	0	0
Solyc00g007920.1.1	0	0	0	0	0	0	0	0	0	0	0	0
Solyc00g007930.1.1	0	0	0	0	0	0	0	0	0	0	0	0
Solyc00g007940.1.1	0	0	0	0	0	0	0	0	0	0	0	0
Solyc00g007950.1.1	0	0	0	0	0	0	0	0	0	0	0	0
Solyc00g007960.1.1	0	0	0	0	0	0	0	0	0	0	0	0
Solyc00g007970.1.1	0	0	0	0	0	0	0	0	0	0	0	0
Solyc00g007980.1.1	0	0	0	0	0	0	0	0	0	0	0	0
Solyc00g007990.1.1	0	0	0	0	0	0	0	0	0	0	0	0
Solyc00g008000.1.1	0	0	0	0	0	0	0	0	0	0	0	0
Solyc00g008010.1.1	0	0	0	0	0	0	0	0	0	0	0	0
Solyc00g008020.1.1	0	0	0	0	0	0	0	0	0	0	0	0
Solyc00g008030.1.1	0	0	0	0	0	0	0	0	0	0	0	0
Solyc00g008040.1.1	0	0	0	0	0	0	0	0	0	0	0	0
Solyc00g008050.1.1	0	0	0	0	0	0	0	0	0	0	0	0
Solyc00g008060.1.1	0	0	0	0	0	0	0	0	0	0	0	0
Solyc00g008070.1.1	0	0	0	0	0	0	0	0	0	0	0	0
Solyc00g008080.1.1	0	0	0	0	0	0	0	0	0	0	0	0
Solyc00g008090.1.1	0	0	0	0	0	0	0	0	0	0	0	0
Solyc00g008100.1.1	0	0	0	0	0	0	0	0	0	0	0	0
Solyc00g008110.1.1	0	0	0	0	0	0	0	0	0	0	0	0
Solyc00g008120.1.1	0	0	0	0	0	0	0	0	0	0	0	0
Solyc00g008130.1.1	0	0	0	0	0	0	0	0	0	0	0	0
Solyc00g008140.1.1	0	0	0	0	0	0	0	0	0	0	0	0
Solyc00g008150.1.1	0	0	0	0	0	0	0	0	0	0	0	0
Solyc00g008160.1.1	0	0	0	0	0	0	0	0	0	0	0	0
Solyc00g008260.1.1	0	0	0	0	0	0	0	0	0	0	0	0
Solyc00g008270.1.1	0	0	0	0	0	0	0	0	0	0	0	0
Solyc00g008570.2.1	3.67419	0.549085	1.55955	0.33614	0.848531	0.591482	0.40041	0.415183	0.22061	2.43428	1.28517	0.219809
Solyc00g008580.1.1	0.75368	1.06385	1.7155	1.97949	0.742465	2.43165	1.83045	0.830367	3.52975	1.73877	2.82737	1.13045
Solyc00g008680.2.1	103.914	119.46	80.4727	95.9492	85.7017	101.341	110.342	102.016	113.283	110.731	100.586	92.6653
Solyc00g008690.1.1	0	0	0	0	0	0	0	0	0	0	0	0
Solyc00g008800.1.1	0	0	0	0	0	0	0	0	0	0	0	0
Solyc00g008900.1.1	0	0	0	0	0	0	0	0	0	0	0	0
Solyc00g008910.1.1	0	0	0	0	0	0	0	0	0	0	0	0
Solyc00g008920.1.1	0	0	0	0	0	0	0	0	0	0	0	0
Solyc00g009020.2.1	161.099	156.764	128.039	123.737	135.977	146.556	154.215	154.656	142.624	143.796	153.706	157.383
Solyc00g009030.1.1	2.16683	1.30408	3.43101	1.86744	2.01526	1.44584	1.08683	1.72005	0.882438	1.24612	0.856779	0.942039
Solyc00g009040.2.1	2.63788	1.88748	3.1191	2.35298	5.09119	3.35173	4.86212	5.30841	10.6996	11.7077	10.367	11.4615
Solyc00g009050.1.1	11.4936	13.7614	15.4395	14.1179	15.0614	14.9185	14.3576	13.019	17.7591	14.084	13.5371	11.5557
Solyc00g009060.2.1	18.6536	17.5707	19.1824	17.4793	15.8039	17.6787	20.0777	19.0095	17.2075	15.6779	16.1075	17.8987
Solyc00g009070.1.1	0	0.0343178	0	0	0.424266	0	0	0.0296559	0	0.0579589	0.0856779	0.0314013
Solyc00g009080.2.1	9.3268	9.50603	7.79774	6.79749	8.06105	8.01786	7.55059	9.40094	5.84615	6.3465	8.48212	6.31166
Solyc00g009090.2.1	47.7645	49.2804	53.4925	52.9233	45.7146	47.3185	53.5977	56.4056	37.3933	40.5423	49.8646	53.6334
Solyc00g009100.2.1	11.0226	12.0456	15.5955	11.2047	9.12171	10.5152	11.0971	11.1506	11.0305	10.3167	10.7954	10.0484
Solyc00g009110.2.1	10.2689	11.4621	16.8431	14.0432	10.5006	10.5152	10.0675	11.2989	8.60377	6.81018	5.39771	4.96141
Solyc00g009120.2.1	4.61629	5.04472	8.73347	4.6686	1.9092	3.54889	2.51686	3.67734	3.41945	2.60815	2.48466	1.19325
Solyc00g009130.2.1	4.14524	3.80928	2.96314	4.25777	1.48493	3.08885	2.68847	3.55871	3.30914	3.65141	2.39898	2.66911
Solyc00g009140.2.1	10.2689	8.40786	7.48583	8.21674	7.84891	5.25761	8.86622	10.2906	7.16981	7.82446	7.02559	7.2223
Solyc00g009240.1.1	0	0	0	0	0	0	0	0	0	0	0	0
Solyc00g009440.1.1	0	0	0	0	0	0	0	0	0	0	0	0
Solyc00g009540.1.1	0	0	0	0	0	0	0	0	0	0	0	0
Solyc00g009650.1.1	0	0	0	0	0	0	0	0	0	0	0	0
Solyc00g009660.1.1	0	0	0	0	0	0	0	0	0	0	0	0
Solyc00g009760.2.1	93.4564	91.8345	117.278	127.882	88.8836	148.922	138.084	54.1221	159.17	121.569	144.624	57.4644
Solyc00g009770.1.1	0	0	0	0	0	0	0	0	0	0	0	0
Solyc00g009780.1.1	0.18842	0.0686356	0	0.224093	0	0	0.0572014	0.0296559	0.330914	0.144897	0.0856779	0.0314013
Solyc00g009790.1.1	0	0	0	0	0	0	0	0	0	0	0	0
Solyc00g009800.1.1	0.37684	0.754992	0.467864	0.97107	0.636398	0.657202	0.915223	0.14828	0.110305	1.24612	0.942457	0.439618
Solyc00g010100.1.1	0	0	0	0	0	0	0	0	0	0	0	0
Solyc00g010110.1.1	0	0	0	0	0	0	0	0	0	0	0	0
Solyc00g010210.1.1	0	0	0	0	0	0	0	0	0	0	0	0
Solyc00g010410.1.1	0	0	0	0	0	0	0	0	0	0	0	0
Solyc00g010420.1.1	0	0	0	0	0	0	0	0	0	0	0	0
Solyc00g010520.1.1	0	0	0	0	0	0	0	0	0	0	0	0
Solyc00g010530.1.1	0.0942101	0.102953	0	0.0746977	0	0.13144	0.114403	0	0.110305	0.0579589	0.342712	0.0628026
Solyc00g010540.1.1	0	0	0	0	0	0	0	0	0	0	0	0
Solyc00g010550.1.1	0.28263	0.240225	0	0.672279	0.106066	0.328601	0.228806	0.0889678	0.110305	0.695507	0.0856779	0.314013
Solyc00g010750.1.1	0	0	0	0	0	0	0	0	0	0	0	0
Solyc00g010760.1.1	0	0	0	0	0	0	0	0	0	0	0	0
Solyc00g010770.1.1	0	0	0	0	0	0	0	0	0	0	0	0
Solyc00g010780.1.1	0	0	0	0	0	0	0	0	0	0	0	0
Solyc00g010790.1.1	0	0	0	0	0	0	0	0	0	0	0	0
Solyc00g010810.1.1	0	0	0	0	0	0	0	0	0	0	0	0
Solyc00g010930.1.1	0	0	0	0	0	0	0	0	0	0	0	0
Solyc00g011130.1.1	0	0	0	0	0	0	0	0	0	0	0	0
Solyc00g011140.1.1	0	0	0	0	0	0	0	0	0	0	0	0
Solyc00g011150.1.1	48.895	42.6914	56.6116	58.7871	37.7596	81.7559	52.7397	19.5729	77.8752	51.5835	69.2278	25.0582
Solyc00g011160.1.1	0.65947	0.171589	0.155955	0.112047	0.424266	0.262881	0.286007	0.237248	0.441219	0.55061	0.514068	0.0314013
Solyc00g011170.1.1	0.28263	0.137271	0.155955	0.0373488	0.106066	0.197161	0.171604	0.0593119	0	0.0869384	0	0.282612
Solyc00g011180.1.1	0	0	0	0	0	0	0	0	0	0	0	0
Solyc00g011310.1.1	0	0	0	0	0	0	0	0	0	0	0	0
Solyc00g011550.1.1	0	0	0	0	0	0	0	0	0	0	0	0
Solyc00g011560.1.1	0	0	0	0	0	0	0	0	0	0	0	0
Solyc00g011660.1.1	0	0	0	0	0	0	0	0	0	0	0	0
Solyc00g011670.1.1	0	0	0	0	0	0	0	0	0	0	0	0
Solyc00g011870.1.1	0	0	0	0	0	0	0	0	0	0	0	0
Solyc00g011880.2.1	6.21786	5.76539	6.08224	5.82642	4.24266	5.8491	5.94895	4.95254	4.30189	5.41916	5.055	5.18122
Solyc00g011890.2.1	65.7586	78.2446	72.2071	91.9155	71.0645	78.3385	96.27	88.9085	116.151	114.585	111.296	113.013
Solyc00g012090.1.1	0	0	0	0	0	0	0	0	0	0	0	0
Solyc00g012310.1.1	0	0	0	0	0	0	0	0	0	0	0	0
Solyc00g012430.1.1	0	0.0686356	0	0.149395	0	0.197161	0.114403	0.0296559	0.22061	0.0869384	0	0.0942039
Solyc00g012440.1.1	6.02944	4.0495	3.89887	3.43609	2.43953	3.61461	6.17775	1.77936	3.30914	4.25998	4.19822	2.10389
Solyc00g012540.1.1	0	0	0	0	0	0	0	0	0	0	0	0
Solyc00g012640.1.1	0	0	0	0	0	0	0	0	0	0	0	0
Solyc00g012650.1.1	0	0	0	0	0	0	0	0	0	0	0	0
Solyc00g012660.1.1	0	0	0	0	0	0	0	0	0	0	0	0
Solyc00g012670.1.1	0	0	0	0	0	0	0	0	0	0	0	0
Solyc00g012680.1.1	0	0	0	0	0	0	0	0	0	0	0	0
Solyc00g012690.1.1	0	0	0	0	0	0	0	0	0	0	0	0
Solyc00g012700.1.1	0	0	0	0	0	0	0	0	0	0	0	0
Solyc00g012800.1.1	0	0	0	0	0	0	0	0	0	0	0	0
Solyc00g012900.1.1	0	0	0	0	0	0	0	0	0	0	0	0
Solyc00g013000.1.1	0	0	0	0	0	0	0	0	0	0	0	0
Solyc00g013100.1.1	0	0	0	0	0	0	0	0	0	0	0	0
Solyc00g013110.1.1	0	0	0	0	0	0.0657202	0.0572014	0.0889678	0	0.0289795	0	0.0628026
Solyc00g013120.2.1	1.31894	0.686356	0.623819	0.63493	1.2728	0.657202	1.71604	0.741399	1.43396	2.28938	2.82737	2.07249
Solyc00g013130.2.1	0	0	0	0	0	0	0	0	0	0	0.0856779	0
Solyc00g013140.1.1	5.36997	4.73586	4.99055	5.93846	3.18199	6.57202	6.46376	4.00355	4.19158	5.73794	5.91178	3.35994
Solyc00g013150.1.1	1.41315	0.583403	0.779774	0.597581	0.424266	0.525761	0.743619	0.415183	0	0.927343	1.37085	0.628026
Solyc00g013160.1.1	1.78999	1.5443	2.02741	1.00842	1.2728	1.70872	2.00205	1.09727	3.41945	1.94162	2.65602	2.13529
Solyc00g013170.1.1	2.35525	2.09339	1.87146	2.09153	3.71232	3.48317	2.63127	2.31316	4.85341	2.52121	6.85424	2.79472
Solyc00g013180.1.1	1.03631	1.20112	0.155955	1.34456	1.37886	1.38012	1.60164	1.69039	2.2061	1.41999	0.771102	0.816434
Solyc00g013190.1.1	0.28263	0.686356	0.31191	0.560233	0.318199	0.657202	0.572014	0.444839	0.441219	0.434692	0.257034	0.345414
Solyc00g013320.1.1	0	0	0	0	0	0	0	0	0	0	0	0
Solyc00g013330.1.1	0	0	0	0	0	0	0	0	0	0	0	0
Solyc00g013770.1.1	0	0	0	0	0	0	0	0	0	0	0	0
Solyc00g014170.1.1	0	0	0	0	0	0	0	0	0	0	0	0
Solyc00g014180.1.1	0	0	0	0	0	0	0	0	0	0	0	0
Solyc00g014190.1.1	0	0	0	0	0	0	0	0	0	0	0	0
Solyc00g014290.1.1	0	0	0	0	0	0	0	0	0	0	0	0
Solyc00g014390.1.1	0	0	0	0	0	0	0	0	0	0	0	0
Solyc00g014790.2.1	1.60157	1.5443	0.623819	1.6807	2.54559	1.70872	2.45966	1.89798	0.661829	1.36204	1.88491	1.44446
Solyc00g014800.1.1	0	0.205907	0.779774	0.261442	0.318199	0	0.343209	0.266904	0.22061	0.260815	0.599746	0.157007
Solyc00g014810.1.1	0.56526	0.240225	0	0.33614	0.636398	0.13144	0.457611	0.207592	0	0.347754	0.257034	0.25121
Solyc00g014820.2.1	0.847891	0.446132	1.09168	0.33614	0.318199	0.788642	0.514813	0.326215	0	0.289795	0.42839	0.376816
Solyc00g014830.2.1	2.26104	2.43656	1.09168	1.4566	1.06066	1.51156	1.83045	0.741399	0.772133	1.82571	1.11381	0.816434
Solyc00g014840.1.1	1.13052	0.823627	0.623819	0.97107	0.848531	0.722922	0.629216	0.622775	0.551524	0.898364	1.02814	0.533822
Solyc00g014850.1.1	0.56526	0.686356	0.935729	0.97107	0.424266	0.788642	0.629216	0.385527	0.441219	0.927343	1.19949	0.502421
Solyc00g014860.1.1	0	0.0343178	0	0	0	0	0.114403	0.0296559	0	0	0	0
Solyc00g014960.1.1	0	0	0	0	0	0	0	0	0	0	0	0
Solyc00g014970.1.1	0	0	0	0	0	0	0	0	0	0	0	0
Solyc00g014980.1.1	0	0	0	0	0	0	0	0	0	0	0	0
Solyc00g014990.1.1	0	0	0	0	0	0	0	0	0	0	0	0
Solyc00g015000.1.1	0	0	0	0	0	0	0	0	0	0	0	0
Solyc00g015600.1.1	0.18842	0.0686356	0.31191	0.0373488	0.212133	0.394321	0.0572014	0.0889678	0	0.115918	0.42839	0
Solyc00g015610.1.1	0	0	0	0	0	0	0	0	0	0	0	0
Solyc00g015720.1.1	0	0	0	0	0	0	0	0	0	0	0	0
Solyc00g015730.1.1	0	0	0	0	0	0	0	0	0	0	0	0
Solyc00g015740.1.1	0	0	0	0	0	0	0	0	0	0	0	0
Solyc00g015750.1.1	0	0	0	0	0	0	0	0	0	0	0	0
Solyc00g015760.1.1	0	0	0	0	0	0	0	0	0	0	0	0
Solyc00g015770.1.1	0	0	0	0	0	0	0	0	0	0	0	0
Solyc00g016470.1.1	0	0	0	0	0	0	0	0	0	0	0	0
Solyc00g016480.1.1	0	0	0	0	0	0	0	0	0	0	0	0
Solyc00g016490.1.1	0	0	0	0	0	0	0	0	0	0	0	0
Solyc00g016590.1.1	0	0	0	0	0	0	0	0	0	0	0	0
Solyc00g016790.1.1	0	0	0	0	0	0	0	0	0	0	0	0
Solyc00g016890.1.1	0	0	0	0	0	0	0	0	0	0	0	0
Solyc00g016900.1.1	0	0	0	0	0	0	0	0	0	0	0	0
Solyc00g016910.1.1	0	0	0	0	0	0	0	0	0	0	0	0
Solyc00g017210.1.1	0	0	0	0	0	0	0	0	0	0	0	0
Solyc00g017220.1.1	0	0	0	0	0	0	0	0	0	0	0	0
Solyc00g017230.1.1	0	0	0	0	0	0	0	0	0	0	0	0
Solyc00g017530.1.1	0	0	0	0	0	0	0	0	0	0	0	0
Solyc00g017540.1.1	0	0	0	0	0	0	0	0	0	0	0	0
Solyc00g017550.1.1	0	0	0	0	0	0	0	0	0	0	0	0
Solyc00g017750.1.1	0	0	0	0	0	0	0	0	0	0	0	0
Solyc00g017760.1.1	0	0	0	0	0	0	0	0	0	0	0	0
Solyc00g017860.1.1	0	0	0	0	0	0	0	0	0	0	0	0
Solyc00g017870.1.1	0	0	0	0	0	0	0	0	0	0	0	0
Solyc00g017880.1.1	0	0	0	0	0	0	0	0	0	0	0	0
Solyc00g017890.1.1	0	0	0	0	0	0	0	0	0	0	0	0
Solyc00g017900.1.1	0	0	0	0	0	0	0	0	0	0	0	0
Solyc00g017910.1.1	0	0	0	0	0	0	0	0	0	0	0	0
Solyc00g017920.1.1	0	0	0	0	0	0	0	0	0	0	0	0
Solyc00g017930.1.1	0	0	0	0	0	0	0	0	0	0	0	0
Solyc00g018760.1.1	0	0	0	0	0	0	0	0	0	0	0	0
Solyc00g018770.1.1	0	0	0	0	0	0	0	0	0	0	0	0
Solyc00g018970.1.1	0	0	0	0.0373488	0	0	0.114403	0.0296559	0	0.0579589	0.0856779	0
Solyc00g019610.1.1	0	0	0	0	0	0	0	0	0	0	0	0
Solyc00g019620.1.1	0	0	0	0	0	0	0	0	0	0	0	0
Solyc00g019630.1.1	0	0	0	0	0	0	0	0	0	0	0	0
Solyc00g019730.1.1	4.61629	6.79493	4.8346	5.56498	4.77299	4.00893	5.49134	4.35942	3.41945	4.49182	4.79796	3.32854
Solyc00g019740.1.1	2.73209	2.53952	1.24764	2.95056	1.48493	1.97161	4.1757	2.0166	1.87518	2.23142	2.39898	1.35026
Solyc00g019750.1.1	1.03631	1.20112	1.24764	1.04577	1.48493	0.854362	0.915223	0.860023	0.882438	1.21714	1.19949	0.533822
Solyc00g019950.1.1	0.47105	0.274542	0.467864	0.149395	0	0.197161	0.40041	0.0593119	0	0.231836	0.171356	0.0628026
Solyc00g019960.1.1	0.28263	0.343178	0	0.0373488	0.106066	0.13144	0.171604	0.266904	0.110305	0.318774	0.257034	0.157007
Solyc00g019970.2.1	1.22473	1.02953	0.935729	0.859023	1.16673	0.657202	0.858021	0.474495	0.772133	0.869384	1.11381	0.785033
Solyc00g019980.2.1	0.47105	0.377496	0.155955	0.224093	0.106066	0.13144	0.629216	0.326215	0.992743	0.782446	0.771102	0.565224
Solyc00g019990.1.1	0	0	0	0	0.106066	0	0	0.177936	0.110305	0.0869384	0.171356	0.0942039
Solyc00g020000.1.1	1.41315	0.446132	1.7155	0.261442	1.06066	0.460041	0.743619	0.652431	0.441219	1.36204	1.19949	0.942039
Solyc00g020010.1.1	0.75368	0.995217	1.40359	0.896372	0.636398	0.657202	1.71604	1.7497	1.54427	1.47795	1.37085	1.50726
Solyc00g020020.2.1	0.37684	0.30886	0	0.0746977	0.212133	0.197161	0.228806	0.207592	0.441219	0.55061	0.599746	0.125605
Solyc00g020030.1.1	0	0.0343178	0	0.186744	0.106066	0.0657202	0	0.0889678	0	0.0869384	0.171356	0.0314013
Solyc00g020040.1.1	0.56526	0.377496	0.623819	0.224093	0	0.262881	0.286007	0.0296559	0.110305	0.289795	0	0.125605
Solyc00g020440.1.1	0	0	0	0	0	0	0	0	0	0	0	0
Solyc00g020540.1.1	0	0	0	0	0	0.0657202	0	0.0889678	0	0.202856	0.0856779	0.125605
Solyc00g020840.2.1	0.0942101	0.240225	0.623819	0.709628	0.530332	0.262881	0.171604	0.207592	0	0.0579589	0.0856779	0.0628026
Solyc00g020940.1.1	0	0	0	0	0	0	0	0	0	0	0	0
Solyc00g020950.1.1	0	0	0	0	0	0	0	0	0	0	0	0
Solyc00g020960.1.1	0	0	0	0	0	0	0	0	0	0	0	0
Solyc00g020970.1.1	0	0	0	0	0	0	0	0	0	0	0	0
Solyc00g020980.1.1	0	0	0	0	0	0	0	0	0	0	0	0
Solyc00g020990.1.1	0	0	0	0	0	0	0	0	0	0	0	0
Solyc00g021490.1.1	0	0	0	0	0	0	0	0	0	0	0	0
Solyc00g021500.1.1	0	0	0	0	0	0	0	0	0	0	0	0
Solyc00g021510.1.1	0	0	0	0	0	0	0	0	0	0	0	0
Solyc00g021520.1.1	0	0	0	0	0	0	0	0	0	0	0	0
Solyc00g021530.1.1	0	0	0	0	0	0	0	0	0	0	0	0
Solyc00g021630.1.1	0.65947	1.13249	0.155955	0.522884	0.106066	0.394321	0.514813	0.326215	0.441219	0.637548	0.42839	0.188408
Solyc00g021640.2.1	1.13052	1.02953	1.55955	0.746977	0.954598	0.394321	1.43004	0.94899	0.882438	1.07224	0.942457	0.785033
Solyc00g021650.1.1	0	0	0	0.0373488	0	0	0	0	0	0.0289795	0	0
Solyc00g021660.1.1	0	0	0	0	0	0	0	0	0	0	0	0
Solyc00g022070.1.1	0	0	0	0	0	0	0.0572014	0	0.110305	0.0289795	0	0.0628026
Solyc00g022080.1.1	0	0.102953	0	0.0746977	0	0	0.0572014	0	0	0.0579589	0	0.0314013
Solyc00g022090.1.1	0.0942101	0	0	0.0373488	0	0.0657202	0.114403	0	0.22061	0.0289795	0.0856779	0
Solyc00g022100.1.1	1.31894	0.720674	0.623819	0.33614	0.106066	0.394321	0.572014	0.266904	0.441219	0.724487	0.942457	0.188408
Solyc00g022110.2.1	4.52208	2.64247	2.80719	3.09995	1.591	2.89169	2.11645	1.60142	1.32366	2.2604	2.91305	1.16185
Solyc00g022920.1.1	0	0	0	0	0	0	0	0	0	0	0	0
Solyc00g023020.1.1	0	0	0	0	0	0	0	0	0	0	0	0
Solyc00g023030.1.1	0	0	0	0	0	0	0	0	0	0	0	0
Solyc00g023040.1.1	0	0	0	0	0	0	0	0	0	0	0	0
Solyc00g023050.1.1	0	0	0	0	0	0	0	0	0	0	0	0
Solyc00g023250.1.1	0	0	0	0	0	0	0	0	0	0	0	0
Solyc00g023260.1.1	0	0	0	0	0	0	0	0	0	0	0	0
Solyc00g023270.1.1	0	0	0	0	0	0	0	0	0	0	0	0
Solyc00g023470.1.1	0	0	0	0	0	0	0	0	0	0	0	0
Solyc00g023570.1.1	0.0942101	0.205907	0	0.0373488	0	0	0.0572014	0.0593119	0	0.0869384	0.0856779	0
Solyc00g023580.1.1	0	0	0	0.149395	0.106066	0.13144	0	0.0593119	0	0	0	0.0314013
Solyc00g023590.2.1	0.28263	0.205907	0.31191	0.33614	0.212133	0.262881	0.171604	0.118624	0	0.202856	0.0856779	0.0942039
Solyc00g023600.1.1	0.18842	0.30886	0.155955	0.149395	0	0.13144	0.572014	0.326215	0.551524	0.0579589	0.171356	0.0628026
Solyc00g023700.2.1	0.18842	0	0.155955	0	0	0	0	0	0	0.0289795	0	0
Solyc00g023710.1.1	0	0	0	0	0	0	0.0572014	0	0	0.0579589	0	0
Solyc00g024010.1.1	0	0	0	0	0	0	0	0	0	0	0	0
Solyc00g024020.1.1	0	0	0	0	0	0	0	0	0	0	0	0
Solyc00g024030.1.1	0	0	0	0	0	0	0	0	0	0	0	0
Solyc00g024040.1.1	0	0	0	0	0	0	0	0	0	0	0	0
Solyc00g024050.1.1	0	0	0	0	0	0	0	0	0	0	0	0
Solyc00g024150.2.1	61.5192	61.6348	50.6853	52.5498	37.5475	42.1266	37.9817	37.2182	36.8418	31.9064	28.7878	25.5921
Solyc00g024160.1.1	0.28263	0.240225	0.467864	0.224093	0	0.394321	0.40041	0.474495	0.110305	0.492651	0.42839	0.628026
Solyc00g024170.1.1	0	0	0	0	0	0	0	0	0	0.0289795	0	0
Solyc00g024370.1.1	0	0	0	0	0	0	0	0	0	0	0	0
Solyc00g024570.1.1	0	0	0	0	0	0	0	0	0	0	0	0
Solyc00g024670.1.1	0	0	0	0	0	0	0	0	0	0	0	0
Solyc00g024680.1.1	0	0	0	0	0	0	0	0	0	0	0	0
Solyc00g024690.1.1	0	0	0	0	0	0	0	0	0	0	0	0
Solyc00g025290.1.1	2.44946	1.13249	2.02741	0.784326	3.71232	1.77444	1.60164	0.771055	0.661829	2.34734	2.65602	1.35026
Solyc00g025300.1.1	0	0	0	0	0	0	0	0	0	0.0289795	0	0
Solyc00g025400.2.1	0.0942101	0.0343178	0	0	0.106066	0	0.0572014	0.0889678	0.110305	0	0	0
Solyc00g025500.1.1	0	0	0	0	0	0	0	0	0	0	0	0
Solyc00g025510.1.1	0	0	0	0	0	0	0	0	0	0	0	0
Solyc00g025520.1.1	0	0	0	0	0	0	0	0	0	0	0	0
Solyc00g025530.1.1	0	0	0	0	0	0	0	0	0	0	0	0
Solyc00g025540.1.1	0	0	0	0	0	0	0	0	0	0	0	0
Solyc00g025650.1.1	0	0	0	0	0	0	0	0	0	0	0	0
Solyc00g025660.1.1	0	0	0	0	0	0	0	0	0	0	0	0
Solyc00g026160.2.1	0	0.0686356	0.467864	0.186744	0	0	0.114403	0.296559	1.98549	3.50652	0.42839	0.408217
Solyc00g026860.1.1	0	0	0	0	0	0	0	0	0	0	0	0
Solyc00g026870.1.1	0	0	0	0	0	0	0	0	0	0	0	0
Solyc00g026880.1.1	0	0	0	0	0	0	0	0	0	0	0	0
Solyc00g026890.1.1	0	0	0	0	0	0	0	0	0	0	0	0
Solyc00g026900.1.1	0	0	0	0	0	0	0	0	0	0	0	0
Solyc00g027120.1.1	0	0	0	0	0	0	0	0	0	0	0	0
Solyc00g027130.1.1	0	0	0	0	0	0	0	0	0	0	0	0
Solyc00g027140.1.1	0	0	0	0	0	0	0	0	0	0	0	0
Solyc00g027640.1.1	0	0	0	0	0	0	0	0	0	0	0	0
Solyc00g027650.1.1	0	0	0	0	0	0	0	0	0	0	0	0
Solyc00g027660.1.1	0	0	0	0	0	0	0	0	0	0	0	0
Solyc00g027670.1.1	0	0	0	0	0	0	0	0	0	0	0	0
Solyc00g027770.2.1	62.9323	64.4145	80.1608	75.8928	73.9283	72.3579	65.1524	68.7128	60.2264	56.0173	57.0615	56.8364
Solyc00g027870.1.1	0	0	0	0	0	0	0	0	0	0	0	0
Solyc00g027970.1.1	0	0	0	0	0	0	0	0	0	0	0	0
Solyc00g027980.1.1	0	0	0	0	0	0	0	0	0	0	0	0
Solyc00g027990.1.1	0	0	0	0	0	0	0	0	0	0	0	0
Solyc00g028090.1.1	0	0	0	0	0	0	0	0	0	0	0	0
Solyc00g028100.1.1	0	0	0	0	0	0	0	0	0	0	0	0
Solyc00g028110.1.1	0	0	0	0	0	0	0	0	0	0	0	0
Solyc00g028120.1.1	0	0	0	0	0	0	0	0	0	0	0	0
Solyc00g028420.1.1	0	0	0	0	0	0	0	0	0	0	0	0
Solyc00g028520.1.1	0	0	0	0	0	0	0	0	0	0	0	0
Solyc00g028530.1.1	0	0	0	0	0	0	0	0	0	0	0	0
Solyc00g028540.1.1	0	0	0	0	0	0	0	0	0	0	0	0
Solyc00g028550.1.1	0	0	0	0	0	0	0	0	0	0	0	0
Solyc00g028560.1.1	0	0	0	0	0	0	0	0	0	0	0	0
Solyc00g028760.1.1	0	0	0	0	0	0	0	0	0	0	0	0
Solyc00g028960.1.1	0	0	0	0	0	0	0	0	0	0	0	0
Solyc00g029060.1.1	0	0	0	0	0	0	0	0	0	0	0	0
Solyc00g029070.1.1	0	0	0	0	0	0	0	0	0	0	0	0
Solyc00g029080.1.1	0	0	0	0	0	0	0	0	0	0	0	0
Solyc00g029090.1.1	0	0	0	0	0	0	0	0	0	0	0	0
Solyc00g029190.2.1	0	0	0	0	0	0	0	0	0.110305	0.144897	0.0856779	0.0314013
Solyc00g029290.1.1	0	0	0	0	0	0	0	0	0	0	0	0
Solyc00g029300.1.1	0	0	0	0	0	0	0	0	0	0	0	0
Solyc00g029500.1.1	0	0	0	0	0	0	0	0	0	0	0	0
Solyc00g029800.1.1	0	0	0	0	0	0	0	0	0	0	0	0
Solyc00g030000.1.1	0	0	0	0	0	0	0	0	0	0	0	0
Solyc00g030100.1.1	1.69578	2.26498	2.65123	2.53972	2.65166	2.23449	3.08888	2.31316	5.84615	5.94079	4.36958	5.55803
Solyc00g030110.1.1	0	0	0	0	0	0	0	0	0	0	0	0
Solyc00g030210.1.1	0	0	0	0	0	0	0	0	0	0	0	0
Solyc00g030510.2.1	0	0	0	0	0	0	0	0	0	0	0	0
Solyc00g030520.2.1	10.2689	8.92263	10.1371	10.3083	8.59138	10.4495	11.0399	10.3796	9.04499	7.4767	11.2238	9.04358
Solyc00g030820.1.1	0	0.102953	0	0	0	0.13144	0.286007	0.118624	0	0.115918	0	0.0314013
Solyc00g031020.1.1	0	0	0	0	0	0	0	0	0	0	0	0
Solyc00g031030.1.1	0	0	0	0	0	0	0	0	0	0	0	0
Solyc00g031040.1.1	0	0	0	0	0	0	0	0	0	0	0	0
Solyc00g031050.1.1	0	0	0	0	0	0	0	0	0	0	0	0
Solyc00g031060.1.1	0	0	0	0	0	0	0	0	0	0	0	0
Solyc00g031360.1.1	0	0	0	0	0	0	0	0	0	0	0	0
Solyc00g031370.1.1	0	0	0	0	0	0	0	0	0	0	0	0
Solyc00g031380.1.1	0	0	0	0	0	0	0	0	0	0	0	0
Solyc00g031390.1.1	0	0	0	0	0	0	0	0	0	0	0	0
Solyc00g031490.1.1	0	0	0	0	0	0	0	0	0	0	0	0
Solyc00g031500.1.1	0	0	0	0	0	0	0	0	0	0	0	0
Solyc00g031700.1.1	0	0	0	0	0	0	0	0	0	0	0	0
Solyc00g031710.1.1	0	0	0	0	0	0	0	0	0	0	0	0
Solyc00g031720.1.1	0	0	0	0	0	0	0	0	0	0	0	0
Solyc00g031730.1.1	0	0	0	0	0	0	0	0	0	0	0	0
Solyc00g032030.1.1	0	0	0	0	0	0	0	0	0	0	0	0
Solyc00g032230.1.1	0	0	0	0	0	0	0	0	0	0	0	0
Solyc00g032940.1.1	0	0	0	0	0	0	0	0	0	0	0	0
Solyc00g033460.2.1	0	0	0.155955	0.0373488	0	0	0.0572014	0	0	0	0	0
Solyc00g033860.1.1	0	0	0	0	0	0	0	0	0	0	0	0
Solyc00g033870.1.1	0	0	0	0	0	0	0	0	0	0	0	0
Solyc00g033880.1.1	0	0	0	0	0	0	0	0	0	0	0	0
Solyc00g033890.1.1	0	0	0	0	0	0	0	0	0	0	0	0
Solyc00g033990.1.1	0	0	0	0	0	0	0	0	0	0	0	0
Solyc00g034000.1.1	0	0	0	0	0	0	0	0	0	0	0	0
Solyc00g034010.1.1	0	0	0	0	0	0	0	0	0	0	0	0
Solyc00g034810.1.1	0	0	0	0	0	0	0	0.0296559	0	0	0	0
Solyc00g035010.1.1	0	0	0	0	0	0	0	0	0	0	0	0
Solyc00g035020.1.1	0	0	0	0	0	0	0	0	0	0	0	0
Solyc00g036320.1.1	0	0	0	0	0	0	0	0	0	0	0	0
Solyc00g036520.1.1	0.18842	0	0	0	0	0	0	0	0	0	0.171356	0
Solyc00g036530.1.1	0	0	0	0	0	0	0	0.118624	0	0	0	0
Solyc00g036540.1.1	0	0	0	0	0	0	0	0	0	0	0	0
Solyc00g036740.1.1	0	0	0	0	0	0	0	0	0	0	0	0
Solyc00g036750.1.1	0	0	0	0	0	0	0	0	0	0	0	0
Solyc00g036760.1.1	0	0	0	0	0	0	0	0	0	0	0	0
Solyc00g036960.1.1	0	0	0	0	0	0	0	0	0	0	0	0
Solyc00g038390.1.1	0	0	0	0	0	0	0	0	0	0	0	0
Solyc00g039290.1.1	0	0	0	0	0	0	0	0	0	0	0	0
Solyc00g039990.2.1	3.29735	2.36793	3.74292	2.27828	2.22739	2.89169	2.17365	3.44009	2.97823	3.04284	3.25576	2.3551
Solyc00g040290.1.1	0	0	0	0	0	0	0	0	0	0	0	0
Solyc00g040390.1.1	0	0	0	0	0	0	0	0	0	0	0	0
Solyc00g040490.1.1	0	0	0	0	0	0	0	0	0	0	0	0
Solyc00g041090.1.1	0.0942101	0	0.31191	0	0	0	0.114403	0	0	0.0869384	0.0856779	0.0314013
Solyc00g041190.1.1	0	0	0	0	0	0	0	0	0	0	0	0
Solyc00g041200.1.1	0	0	0	0	0	0	0	0	0	0	0	0
Solyc00g041210.1.1	0	0	0	0	0	0	0	0	0	0	0	0
Solyc00g041220.1.1	0	0	0	0	0	0	0	0	0	0	0	0
Solyc00g042120.1.1	0	0	0	0	0	0	0	0	0	0	0	0
Solyc00g042130.1.1	0	0	0	0	0	0	0	0	0	0	0	0
Solyc00g042140.1.1	0	0	0	0.0373488	0	0	0	0	0	0	0	0
Solyc00g042640.1.1	0.28263	0.0343178	0.467864	0.373488	0	0	0.0572014	0.0889678	0	0	0.0856779	0.0314013
Solyc00g042840.1.1	2.54367	1.85316	1.87146	1.7554	3.60626	2.36593	2.23086	1.54211	1.76488	1.47795	1.28517	1.88408
Solyc00g042850.1.1	0.0942101	0	0	0	0	0	0	0	0	0	0	0
Solyc00g044350.2.1	38.2493	27.6945	41.1721	30.6634	37.1232	26.2881	17.618	19.306	6.39768	5.33222	7.96805	6.84549
Solyc00g044550.1.1	0	0	0	0	0	0	0	0	0	0	0	0
Solyc00g044750.1.1	0	0	0	0	0	0	0	0	0	0	0	0
Solyc00g045570.1.1	0	0	0	0	0	0	0	0	0	0.0289795	0	0
Solyc00g046570.1.1	0	0	0	0	0	0	0	0	0	0	0	0
Solyc00g046580.1.1	0	0	0	0	0	0	0	0	0	0	0	0
Solyc00g046980.1.1	0	0	0	0	0	0	0	0	0	0	0	0
Solyc00g047180.1.1	0	0	0	0	0	0	0	0	0	0	0	0
Solyc00g047190.1.1	0	0	0	0	0	0	0	0	0	0.0289795	0	0
Solyc00g047200.1.1	0	0	0	0.0746977	0	0	0.0572014	0.0889678	0.110305	0	0.0856779	0
Solyc00g047700.2.1	245.794	185.385	236.739	192.981	279.803	215.891	213.876	202.254	207.924	199.35	227.132	195.316
Solyc00g047810.1.1	0	0.0686356	0	0	0	0	0	0.0889678	0	0	0.171356	0
Solyc00g048410.1.1	0	0	0	0	0	0	0	0	0	0	0	0
Solyc00g048510.2.1	0	0	0	0	0	0	0	0	0.110305	0	0	0
Solyc00g049210.1.1	0.65947	0.583403	0.467864	0.149395	0.530332	0.262881	0.686417	0.0593119	0.330914	0.347754	0.42839	0.157007
Solyc00g049220.1.1	0.0942101	0.0686356	0	0.0746977	0	0	0.114403	0	0	0.0579589	0	0
Solyc00g049520.2.1	0	0	0	0.0373488	0	0	0	0	0	0.0289795	0	0.0628026
Solyc00g049620.1.1	0	0	0	0	0	0	0	0	0	0	0	0
Solyc00g049920.1.1	0	0	0	0	0	0	0	0	0	0	0	0
Solyc00g050020.1.1	0	0	0	0	0	0	0	0	0	0	0	0
Solyc00g050030.1.1	0	0	0	0	0	0	0	0	0	0	0	0
Solyc00g050130.1.1	5.46418	5.0104	5.14651	4.44451	4.66692	3.02313	3.8325	3.91459	5.51524	5.79589	3.94119	4.61599
Solyc00g050430.2.1	18.2768	16.5412	14.9717	12.0637	12.728	15.4442	28.8295	44.5136	84.3831	101.022	64.6012	66.9476
Solyc00g052430.2.1	0.18842	0.240225	0.623819	0.261442	0.212133	0.0657202	0.228806	0.0593119	0.441219	0.318774	0.171356	0.0314013
Solyc00g052530.2.1	0	0	0	0	0	0	0	0	0	0	0	0
Solyc00g052540.1.1	0	0	0	0	0	0	0	0	0	0	0	0
Solyc00g052940.2.1	0	0	0	0.0373488	0.212133	0	0	0	0	0	0	0
Solyc00g053440.2.1	9.89206	8.03037	10.449	9.15046	6.68218	9.00366	7.77939	7.85883	11.0305	7.4767	8.91051	7.41071
Solyc00g053740.1.1	0	0	0	0	0	0	0	0	0	0	0	0
Solyc00g055940.1.1	0	0	0	0	0	0	0	0	0	0	0	0
Solyc00g055950.1.1	0	0	0	0	0	0	0	0	0	0	0	0
Solyc00g055960.1.1	0	0	0	0	0	0	0	0	0	0	0	0
Solyc00g055970.1.1	0	0	0	0	0	0	0	0	0	0	0	0
Solyc00g055980.1.1	0	0	0	0.0373488	0	0	0	0	0	0	0	0
Solyc00g056180.1.1	0	0	0	0	0	0	0	0	0	0	0	0
Solyc00g056680.1.1	0.75368	0.892263	1.40359	0.560233	1.16673	0.525761	1.31563	1.06761	1.32366	1.30408	0.685424	0.816434
Solyc00g057280.1.1	0	0	0	0	0	0	0	0	0	0	0	0
Solyc00g057880.2.1	0.0942101	0.102953	0.155955	0.149395	0	0.0657202	0	0	0.110305	0.0289795	0.171356	0
Solyc00g058280.1.1	0	0	0	0	0	0	0	0	0	0	0	0
Solyc00g058480.1.1	0	0	0	0	0	0	0	0	0	0	0	0
Solyc00g058490.1.1	0	0	0	0	0	0	0	0	0	0	0	0
Solyc00g058890.1.1	0	0	0	0	0	0	0	0	0	0	0	0
Solyc00g058900.1.1	0	0	0	0	0	0	0	0	0	0	0	0
Solyc00g059100.2.1	11.9647	10.6728	9.82515	11.6155	11.4552	13.6041	9.32383	11.032	6.9492	6.23059	9.68161	9.10638
Solyc00g059500.1.1	2.8263	2.74542	1.7155	3.32405	1.69706	1.90589	1.14403	2.37248	1.21335	2.4053	1.71356	1.78987
Solyc00g060700.1.1	0	0	0	0	0	0	0	0	0	0	0	0
Solyc00g060710.1.1	0	0	0	0	0	0	0	0	0	0	0	0
Solyc00g060810.2.1	0	0	0	0	0	0	0	0	0	0	0	0
Solyc00g062710.1.1	0	0	0	0	0	0	0	0	0	0	0	0
Solyc00g063110.2.1	0	0	0	0	0	0	0	0	0	0	0	0
Solyc00g063510.1.1	0	0	0	0	0	0	0	0	0	0	0	0
Solyc00g065510.1.1	0	0	0	0	0	0	0	0	0	0	0	0
Solyc00g065610.1.1	0	0	0	0	0	0	0	0	0	0	0	0
Solyc00g065620.1.1	0	0	0	0	0	0	0	0	0	0	0	0
Solyc00g065630.1.1	0	0	0	0	0	0	0	0	0	0	0	0
Solyc00g065930.1.1	0	0	0	0	0	0	0	0	0	0	0	0
Solyc00g065940.1.1	0	0	0	0	0	0	0	0	0	0	0	0
Solyc00g066140.1.1	0	0	0	0	0	0	0	0	0	0	0	0
Solyc00g066150.1.1	0	0	0	0	0	0	0	0	0	0	0	0
Solyc00g066350.1.1	0	0	0	0	0	0	0	0	0	0	0	0
Solyc00g066360.1.1	0	0	0	0	0	0	0	0	0	0	0	0
Solyc00g066370.1.1	0	0	0	0	0	0	0	0	0	0	0	0
Solyc00g067470.1.1	1.69578	1.81884	6.08224	2.87586	3.71232	2.30021	2.97447	1.27521	3.08853	1.73877	3.34144	2.73191
Solyc00g068970.2.1	22.422	29.3074	29.7874	37.8344	17.501	42.4552	42.2719	13.5824	42.4673	33.877	36.5845	16.0775
Solyc00g068980.1.1	52.475	111.052	84.5275	148.35	74.3525	175.999	139.972	60.2312	243.774	122.496	192.604	62.9596
Solyc00g069680.1.1	0	0	0	0	0	0	0	0	0	0	0	0
Solyc00g069880.2.1	0	0.0686356	0	0.0373488	0	0.0657202	0.114403	0.0593119	0.22061	0.202856	0.171356	0.0628026
Solyc00g070680.1.1	0	0	0	0	0	0	0	0	0	0	0	0
Solyc00g071180.2.1	0	0	0	0	0	0	0.286007	0.0889678	1.98549	0.666528	1.11381	1.06764
Solyc00g071580.1.1	0	0	0	0	0	0	0	0	0	0	0	0
Solyc00g071590.1.1	0	0	0	0	0	0	0	0	0	0	0	0
Solyc00g071600.1.1	0	0	0	0	0	0	0	0	0	0	0	0
Solyc00g072100.2.1	4.42787	4.22109	5.30246	5.41558	6.57612	6.1777	5.03373	4.47805	4.19158	3.76733	6.93991	4.99281
Solyc00g072400.2.1	0	0	0	0	0	0	0	0	0	0	0	0
Solyc00g072800.2.1	0	0	0	0	0	0	0	0	0	0	0	0
Solyc00g073200.1.1	0	0	0	0	0	0	0	0	0	0	0	0
Solyc00g073900.1.1	0	0	0	0	0	0	0	0	0	0	0	0
Solyc00g073910.1.1	0	0	0	0	0	0	0	0	0	0	0	0
Solyc00g074210.1.1	0	0	0	0	0	0	0	0	0	0	0	0
Solyc00g074810.1.1	0	0	0	0	0	0	0	0	0	0	0	0
Solyc00g074820.1.1	0	0	0	0	0	0	0	0	0	0	0	0
Solyc00g074830.1.1	0	0	0	0	0	0	0	0	0	0	0	0
Solyc00g075030.2.1	0	0	0	0	0	0	0	0	0	0	0	0
Solyc00g075040.1.1	0	0	0	0	0	0	0	0	0	0	0	0
Solyc00g075440.1.1	0	0.0686356	0.623819	0.0373488	0	0	0.0572014	0	0	0	0.171356	0
Solyc00g075450.2.1	0	0	0	0.0373488	0.106066	0	0	0	0.110305	0.0289795	0	0
Solyc00g076250.1.1	0	0	0	0	0	0	0	0	0	0	0	0
Solyc00g079050.1.1	0	0	0	0	0	0	0	0	0	0	0	0
Solyc00g080550.1.1	0	0	0	0	0	0	0	0	0	0	0	0
Solyc00g080750.2.1	0	0	0	0	0	0	0	0	0	0.0289795	0	0.0628026
Solyc00g082150.2.1	84.1296	61.3259	63.0057	62.1485	69.2614	62.3027	59.2035	61.1209	55.0421	59.4369	61.2597	56.6166
Solyc00g082550.1.1	0	0	0.155955	0	0	0	0	0	0	0	0.171356	0
Solyc00g084650.1.1	0	0	0	0	0	0	0	0	0	0	0	0
Solyc00g084750.2.1	0	0	0	0	0	0	0	0	0	0	0	0
Solyc00g084760.1.1	0	0.0686356	0	0.0746977	0.106066	0	0	0.385527	0	0.463672	0.342712	0.219809
Solyc00g084770.1.1	0	0.102953	0	0.0746977	0	0	0.114403	0.0296559	0.661829	0.260815	0.342712	0.0942039
Solyc00g084870.2.1	0	0	0	0	0	0	0	0	0	0	0	0.0314013
Solyc00g085070.2.1	66.2297	67.7434	59.7307	65.1364	65.1248	63.0914	71.7878	71.4412	75.8897	79.9254	75.6536	74.9863
Solyc00g085370.1.1	0	0	0	0	0	0	0	0	0	0	0	0
Solyc00g085770.1.1	0	0	0	0	0	0	0	0	0	0	0	0
Solyc00g085780.1.1	0	0	0	0	0	0	0	0	0	0	0	0
Solyc00g088080.1.1	0	0	0	0	0	0	0	0	0	0	0	0
Solyc00g088090.1.1	0	0	0	0	0	0	0	0	0	0	0	0
Solyc00g088190.1.1	0	0	0	0.0373488	0	0	0	0	0	0	0	0
Solyc00g088200.1.1	0	0	0	0	0	0	0	0	0	0	0	0
Solyc00g088210.1.1	0	0	0	0	0	0	0	0	0	0	0	0
Solyc00g090110.1.1	0	0	0	0	0	0	0	0	0	0	0	0
Solyc00g090120.1.1	0	0	0	0	0	0	0	0	0	0	0	0
Solyc00g090130.1.1	0	0	0	0	0	0	0	0	0	0	0	0
Solyc00g090430.2.1	0	0	0	0	0	0	0	0	0	0	0	0
Solyc00g090630.1.1	0	0	0	0	0	0	0	0	0	0	0	0
Solyc00g090640.1.1	0	0	0	0	0	0	0	0	0	0	0	0
Solyc00g090650.1.1	0	0	0	0	0	0	0	0	0	0	0	0
Solyc00g090660.1.1	0	0	0	0	0	0	0	0	0	0	0	0
Solyc00g090860.1.1	0	0	0	0	0	0	0	0	0	0	0	0
Solyc00g090870.2.1	15.262	15.3744	17.4669	16.7696	18.8798	15.1814	14.5292	13.7604	13.3469	14.7795	14.8223	12.7803
Solyc00g091170.2.1	14.6026	14.2419	12.0085	9.82274	11.0309	11.501	12.1839	10.6168	9.1553	9.07057	7.45398	8.07014
Solyc00g092870.1.1	0	0	0	0	0	0	0	0	0	0	0	0
Solyc00g092880.1.1	0	0	0	0	0	0	0	0	0	0	0	0
Solyc00g092890.1.1	0	0	0	0	0	0	0	0	0	0	0	0
Solyc00g092900.1.1	0	0.102953	0	0.0746977	0	0	0	0	0	0.0289795	0.171356	0
Solyc00g093000.1.1	0.942101	0.652038	1.09168	0.672279	0.318199	0.525761	0.457611	0.652431	0.882438	0.666528	0.599746	0.345414
Solyc00g093100.1.1	0	0	0	0	0	0	0	0	0	0	0	0
Solyc00g093300.1.1	0	0	0	0	0	0	0	0	0	0	0	0
Solyc00g093310.1.1	0	0	0	0	0	0	0	0	0	0	0	0
Solyc00g094010.1.1	0	0	0	0	0	0	0	0	0	0	0	0
Solyc00g094020.1.1	0	0	0	0	0	0	0	0	0	0	0	0
Solyc00g094520.1.1	0.56526	0.446132	1.09168	0.746977	0.530332	0.722922	0.514813	0.237248	0.330914	0.463672	0.771102	0.47102
Solyc00g094530.1.1	0.47105	0.617721	0.623819	0.63493	0.106066	0.394321	0.858021	0.741399	0.551524	0.898364	0.514068	0.408217
Solyc00g094540.1.1	1.13052	0.754992	0.623819	0.709628	0.636398	0.985803	1.25843	0.919334	0.551524	1.33306	0.599746	0.659428
Solyc00g094550.1.1	0	0.0686356	0.155955	0.224093	0	0	0.0572014	0	0	0.144897	0.257034	0
Solyc00g094850.1.1	0	0	0	0	0	0	0	0	0	0	0	0
Solyc00g095450.1.1	0	0	0	0	0	0	0	0	0	0	0	0
Solyc00g095460.1.1	0	0	0	0	0	0	0	0	0	0	0	0
Solyc00g095760.1.1	0	0	0	0	0	0	0	0	0	0	0	0
Solyc00g095860.1.1	0	0	0	0	0	0	0	0	0	0	0	0
Solyc00g096060.1.1	0	0	0	0	0	0	0	0	0	0	0	0
Solyc00g096460.1.1	7.15996	7.03515	4.8346	5.86377	4.56086	4.79757	4.97652	6.82087	3.52975	6.37548	4.62661	5.68364
Solyc00g097260.1.1	0	0	0	0	0	0	0	0	0	0	0	0
Solyc00g097760.1.1	0	0	0	0	0	0	0	0	0	0	0	0
Solyc00g097960.1.1	9.70364	11.4278	5.14651	5.52763	4.66692	6.63774	6.34936	6.93949	6.06676	7.33181	6.16881	6.34306
Solyc00g098560.2.1	3.95682	3.50042	4.67864	3.73488	1.69706	2.56309	3.08888	3.35112	5.62554	3.82529	4.2839	3.70535
Solyc00g099160.1.1	0	0	0	0	0	0	0	0	0	0	0	0
Solyc00g099460.1.1	0	0	0	0	0	0	0	0	0	0	0	0
Solyc00g099470.1.1	0	0	0	0	0	0	0	0	0	0	0	0
Solyc00g099570.1.1	0	0	0	0	0	0	0	0	0	0	0	0
Solyc00g099580.1.1	1.31894	1.02953	0.467864	0.896372	1.2728	1.11724	1.43004	2.96559	0.992743	2.23142	2.82737	2.07249
Solyc00g099880.1.1	0	0	0	0	0	0	0	0	0	0	0	0
Solyc00g100880.2.1	0	0	0	0	0	0	0.858021	0.889678	0.661829	0.289795	3.08441	3.64255
Solyc00g101700.1.1	0	0	0	0	0	0	0	0	0	0	0	0
Solyc00g102000.1.1	7.15996	1.88748	5.30246	1.34456	2.54559	1.97161	3.37488	1.24555	0.22061	10.0269	5.8261	0.816434
Solyc00g102400.2.1	0	0	0	0	0	0	0	0	0	0	0	0
Solyc00g104200.1.1	0	0	0	0	0	0	0	0	0	0	0	0
Solyc00g104210.1.1	0	0	0	0	0	0	0	0	0	0	0	0
Solyc00g104310.1.1	0	0	0	0	0	0	0	0	0	0	0	0
Solyc00g104320.1.1	0	0	0	0	0	0	0	0	0	0	0	0
Solyc00g104330.1.1	0	0	0	0	0	0	0	0	0	0	0	0
Solyc00g104630.1.1	0	0	0	0	0	0	0	0	0	0	0	0
Solyc00g104730.1.1	0	0	0	0	0	0	0	0	0	0	0	0
Solyc00g104740.1.1	0	0	0	0	0	0	0	0	0	0	0	0
Solyc00g104940.1.1	0	0	0	0	0	0	0	0	0	0	0	0
Solyc00g105340.1.1	0	0	0	0	0	0	0	0	0	0	0	0
Solyc00g105350.1.1	0	0	0	0	0	0	0	0	0	0	0	0
Solyc00g105750.1.1	0	0	0	0	0	0	0	0	0	0	0	0
Solyc00g106650.1.1	0.942101	0.926581	0.155955	0.896372	0.318199	0.394321	1.14403	0.860023	0.882438	1.18816	1.37085	0.910638
Solyc00g107050.1.1	0	0	0	0	0	0	0	0	0	0	0	0
Solyc00g107550.1.1	0	0	0	0	0	0	0	0	0	0	0	0
Solyc00g108550.1.1	0.18842	0	0	0	0	0	0	0	0	0.0289795	0	0.0314013
Solyc00g109450.1.1	0	0	0	0	0	0	0	0	0	0	0	0
Solyc00g109850.1.1	0	0	0	0	0	0	0	0	0	0	0	0
Solyc00g109860.1.1	0	0	0	0	0	0	0	0	0	0	0	0
Solyc00g110060.1.1	0	0	0	0	0	0	0	0	0	0	0	0
Solyc00g110070.1.1	0	0	0	0	0	0	0	0	0	0	0	0
Solyc00g110370.1.1	0	0	0	0	0	0	0	0	0	0	0	0
Solyc00g110870.2.1	28.5456	30.5085	18.0908	22.6334	19.4102	21.4905	29.3443	29.4484	21.3991	20.7203	17.821	18.4012
Solyc00g111170.1.1	0	0	0	0	0	0	0	0	0	0	0	0
Solyc00g111270.1.1	0	0	0	0	0	0	0	0	0	0	0	0
Solyc00g111370.1.1	0	0	0	0	0	0	0	0	0	0	0	0
Solyc00g111770.1.1	0	0	0	0	0	0	0	0	0	0	0	0
Solyc00g111780.1.1	0	0	0	0	0	0	0	0	0	0	0	0
Solyc00g112180.1.1	0	0	0	0	0	0	0	0	0	0	0	0
Solyc00g112190.2.1	0.0942101	0	0	0.0373488	0	0	0	0.0593119	0	0.0289795	0	0
Solyc00g112490.1.1	0	0	0	0	0	0	0	0	0	0	0	0
Solyc00g112500.1.1	0	0	0	0	0	0	0	0	0	0	0	0
Solyc00g112600.1.1	0	0	0	0	0	0	0	0	0	0	0	0
Solyc00g112700.1.1	0	0	0	0	0	0	0	0	0	0	0	0
Solyc00g112710.1.1	0	0	0	0	0	0	0	0	0	0	0	0
Solyc00g112810.1.1	0	0	0	0	0	0	0	0	0	0	0	0
Solyc00g112820.1.1	0	0	0	0	0	0	0	0	0	0	0	0
Solyc00g112830.1.1	0	0	0	0	0	0	0	0	0	0	0	0
Solyc00g112930.2.1	0.0942101	0	0	0	0	0	0	0	0.110305	0	0	0
Solyc00g113230.1.1	0	0	0	0	0	0	0	0	0	0	0	0
Solyc00g113330.1.1	0	0	0	0	0	0	0	0	0	0	0	0
Solyc00g113730.1.1	0	0	0	0	0	0	0	0	0	0	0	0
Solyc00g113740.1.1	0	0	0	0	0	0	0	0	0	0	0	0
Solyc00g113750.1.1	0	0	0	0	0	0	0	0	0	0	0	0
Solyc00g114550.1.1	0	0	0	0	0	0	0	0	0	0	0	0
Solyc00g116150.1.1	0	0	0	0	0	0	0	0	0	0	0	0
Solyc00g117450.2.1	2.73209	2.26498	1.55955	2.35298	2.22739	3.87749	3.26048	3.9739	1.54427	1.10122	2.05627	1.41306
Solyc00g117650.1.1	0	0	0	0	0	0	0	0	0	0	0	0
Solyc00g118680.2.1	1.41315	0.754992	1.09168	0.63493	2.01526	1.05152	1.43004	1.33452	0.551524	0.927343	0.942457	0.753631
Solyc00g118690.1.1	1.97841	2.60815	4.05482	3.73488	3.92446	3.94321	4.74772	3.52906	5.29463	5.2163	2.99873	4.01937
Solyc00g120120.1.1	0	0	0	0	0	0	0	0	0	0	0	0
Solyc00g120820.1.1	0	0	0	0	0	0	0	0	0	0	0	0
Solyc00g120830.1.1	0	0	0	0	0	0	0	0	0	0	0	0
Solyc00g120930.1.1	0	0	0	0	0	0	0	0	0	0	0	0
Solyc00g121230.1.1	0	0	0	0	0	0	0	0	0	0	0	0
Solyc00g121730.1.1	0	0	0	0	0	0	0	0	0	0	0	0
Solyc00g122530.1.1	0	0	0	0	0	0	0	0	0	0	0	0
Solyc00g123030.1.1	0	0	0	0	0	0	0	0	0	0	0	0
Solyc00g123040.1.1	0	0	0	0	0	0	0	0	0	0	0	0
Solyc00g123240.1.1	0	0	0	0	0	0	0	0	0	0	0	0
Solyc00g124840.1.1	0	0	0	0	0	0	0	0	0	0	0	0
Solyc00g124850.1.1	0	0	0	0	0	0	0	0	0	0	0	0
Solyc00g124860.1.1	0	0	0	0	0	0	0	0	0	0	0	0
Solyc00g125260.1.1	0	0	0	0	0	0	0	0	0	0	0	0
Solyc00g125270.1.1	0	0	0	0	0	0	0	0	0	0	0	0
Solyc00g125580.1.1	0	0	0	0	0	0	0	0	0	0	0	0
Solyc00g125980.1.1	2.16683	0.583403	1.87146	0.597581	2.01526	0.788642	1.08683	0.860023	0.330914	1.15918	1.37085	0.565224
Solyc00g125990.1.1	0.75368	0.78931	0	0.261442	0.212133	0.525761	0.629216	0.237248	0.110305	0.55061	0.342712	0.188408
Solyc00g126000.1.1	0.847891	0.411814	0.155955	0.112047	0.424266	0	0.114403	0.266904	0.330914	0.637548	1.02814	0.439618
Solyc00g126010.1.1	0.65947	0.549085	0.31191	0.186744	0.848531	0.13144	0.343209	0.266904	0.110305	1.01428	0.42839	0.628026
Solyc00g126420.1.1	0	0	0	0	0	0	0	0	0	0	0	0
Solyc00g126430.1.1	0	0	0	0	0	0	0	0	0	0	0	0
Solyc00g126440.1.1	0	0	0	0	0	0	0	0	0	0	0	0
Solyc00g127540.1.1	0	0	0	0	0	0	0	0	0	0	0	0
Solyc00g127550.1.1	0	0	0	0	0	0	0	0	0	0	0	0
Solyc00g127560.1.1	0	0	0	0	0	0	0	0	0	0	0.171356	0
Solyc00g127660.2.1	34.4809	36.5142	36.8053	36.0043	30.6532	34.7003	35.6365	34.4009	30.3338	33.877	38.6408	33.0656
Solyc00g127670.1.1	7.06575	6.3488	8.42156	7.35772	7.74285	7.42638	10.5251	7.62158	11.582	8.7518	10.9668	7.59912
Solyc00g127870.2.1	23.7409	24.8118	25.2647	19.4214	21.0011	24.6451	26.7131	21.7378	23.2743	18.6918	23.7328	21.7297
Solyc00g128870.2.1	84.0354	85.3484	92.6372	81.2337	94.0809	78.8642	77.8511	67.0818	78.2061	66.5658	73.8544	66.0998
Solyc00g129670.1.1	0	0	0	0	0	0	0	0	0	0	0	0
Solyc00g129680.1.1	0	0	0	0	0	0	0	0	0	0	0	0
Solyc00g129880.1.1	0	0	0	0	0	0	0	0	0	0	0	0
Solyc00g129980.1.1	0	0	0	0	0	0	0	0	0	0	0	0
Solyc00g130180.1.1	0	0	0	0	0	0	0	0	0	0	0	0
Solyc00g130190.1.1	0	0	0	0	0	0	0	0	0	0	0	0
Solyc00g130290.1.1	0	0	0	0	0	0	0	0	0	0	0	0
Solyc00g130690.1.1	0	0	0	0	0	0	0	0	0	0	0	0
Solyc00g130700.1.1	0	0	0	0	0	0	0	0	0	0	0	0
Solyc00g130800.1.1	0	0	0	0	0	0	0	0	0	0	0	0
Solyc00g130810.1.1	0	0	0	0	0	0	0	0	0	0	0	0
Solyc00g131610.1.1	0	0	0	0	0	0	0	0	0	0	0	0
Solyc00g131710.1.1	0	0	0	0	0	0	0	0	0	0	0	0
Solyc00g133110.1.1	0	0	0	0	0	0	0	0	0	0	0	0
Solyc00g133710.1.1	0	0	0	0	0	0	0	0	0	0	0	0
Solyc00g133720.1.1	0	0	0	0	0	0	0	0	0	0	0	0
Solyc00g134620.1.1	0	0	0	0	0	0	0	0	0	0	0	0
Solyc00g134820.1.1	0	0	0	0	0	0	0	0	0	0	0	0
Solyc00g134830.1.1	0	0	0	0	0	0	0	0	0	0	0	0
Solyc00g134840.1.1	0	0	0	0	0	0	0	0	0	0	0	0
Solyc00g135040.1.1	0	0	0	0	0	0	0	0	0	0	0	0
Solyc00g135050.1.1	0	0	0	0	0	0	0	0	0	0	0	0
Solyc00g135060.1.1	0	0	0	0	0	0	0	0	0	0	0	0
Solyc00g135260.1.1	0	0	0	0	0	0	0	0	0	0	0	0
Solyc00g136260.1.1	0.0942101	0.102953	0	0.410837	0.106066	0.0657202	0.0572014	0	0	0.0289795	0	0.0314013
Solyc00g136560.2.1	0.0942101	0.137271	0	0.112047	0.424266	0.394321	0.286007	0.237248	0.110305	0.289795	0	0.188408
Solyc00g138060.2.1	0	0	0	0	0	0	0	0	0	0	0	0.0314013
Solyc00g139760.1.1	0	0	0	0	0	0	0	0	0	0	0	0
Solyc00g140060.2.1	29.8646	27.5915	24.9528	26.0695	26.1984	24.8422	24.7682	27.4021	27.0247	27.7334	27.5026	33.9134
Solyc00g141360.1.1	0	0	0	0	0	0	0	0	0	0	0	0
Solyc00g141560.1.1	0	0	0	0	0	0	0	0	0	0	0	0
Solyc00g142160.1.1	0.18842	0.171589	0.31191	0.149395	0.424266	0.197161	0.629216	0.504151	0.110305	0.260815	0.0856779	0.345414
Solyc00g142170.2.1	0.75368	1.20112	0.623819	1.00842	0.636398	1.44584	1.25843	0.800711	0.661829	1.79673	0.514068	1.38166
Solyc00g143770.1.1	5.74681	2.43656	4.36673	1.41926	4.03052	2.56309	1.43004	1.45314	1.65457	3.36162	3.5128	1.91548
Solyc00g144470.1.1	0	0	0	0	0	0	0	0	0	0	0	0
Solyc00g145170.1.1	0	0.0343178	0	0	0	0	0	0	0	0	0	0
Solyc00g147570.2.1	0	0	0	0	0	0	0	0	0	0	0	0
Solyc00g147770.1.1	0	0.0343178	0	0	0	0.0657202	0	0.0889678	0	0	0.0856779	0.0942039
Solyc00g149970.2.1	0	0	0	0	0	0	0	0	0	0	0	0
Solyc00g153680.1.1	0	0	0	0	0	0	0	0	0	0	0	0
Solyc00g153980.1.1	0	0	0	0.0746977	0	0.13144	0	0.0296559	0	0	0.0856779	0.0314013
Solyc00g154480.1.1	0	0	0	0	0	0	0	0	0	0	0	0
Solyc00g154980.1.1	0	0	0	0	0	0	0	0	0	0	0	0
Solyc00g156980.2.1	35.423	33.2196	24.3289	17.7407	17.2888	23.4621	18.0184	27.8469	9.1553	15.8807	11.6522	12.5291
Solyc00g157080.1.1	0.0942101	0.0343178	0	0	0	0	0.0572014	0	0	0.0579589	0	0
Solyc00g157180.2.1	0.18842	0.102953	0	0.0746977	0	0.13144	0	0.14828	0	0	0.0856779	0.0628026
Solyc00g160780.2.1	2.44946	0.78931	0.623819	0.560233	0.848531	0.920083	0.743619	1.18624	0.661829	0.724487	0.771102	0.439618
Solyc00g163580.1.1	0	0	0	0	0	0	0	0	0	0	0	0
Solyc00g164580.1.1	0	0.0343178	0	0.186744	0	0.13144	0	0	0	0.0869384	0	0
Solyc00g164680.1.1	4.33366	3.67201	3.58696	4.85535	4.13659	3.15457	2.80287	3.79596	3.86067	4.40488	3.34144	4.8672
Solyc00g165080.1.1	0	0	0	0	0	0	0	0	0	0	0	0
Solyc00g165090.1.1	0	0	0	0	0	0	0	0	0	0	0	0
Solyc00g165190.1.1	0	0	0	0	0	0	0	0	0	0	0	0
Solyc00g166190.1.1	0	0	0	0	0	0	0	0	0	0	0	0
Solyc00g166490.1.1	0	0	0	0	0	0	0	0	0	0	0	0
Solyc00g166690.1.1	0	0.102953	0	0.0373488	0.212133	0	0.0572014	0	0	0	0	0
Solyc00g167290.1.1	0	0	0	0	0	0	0	0	0	0	0	0
Solyc00g167300.1.1	0	0	0	0	0	0	0	0	0	0	0	0
Solyc00g167800.1.1	0	0	0	0	0	0	0	0	0	0	0	0
Solyc00g168200.1.1	0.47105	0.30886	0.467864	0.261442	0	0.197161	0.114403	0.533807	0.110305	0.376733	0.342712	0.188408
Solyc00g170200.1.1	22.6104	22.5125	8.10965	9.37456	6.25792	6.44058	5.54854	4.68564	3.86067	4.54978	7.02559	3.98797
Solyc00g170210.2.1	13.7547	9.98648	15.4395	8.88902	11.8794	9.46371	9.26663	11.5658	8.82438	10.7514	9.93864	7.1595
Solyc00g170510.1.1	0	0	0	0	0	0	0	0	0	0	0	0
Solyc00g171710.1.1	0	0	0	0	0	0	0	0	0	0	0	0
Solyc00g171810.2.1	1.97841	0.823627	2.49528	0.410837	1.48493	0.525761	0.858021	0.622775	0.110305	1.59387	1.5422	0.47102
Solyc00g172410.1.1	0	0	0	0	0	0	0	0	0	0	0	0
Solyc00g173430.1.1	0	0	0	0	0	0	0	0	0	0	0	0
Solyc00g174330.2.1	0	0	0	0	0	0	0	0	0	0	0	0
Solyc00g174340.1.1	0	0	0	0	0	0	0	0	0	0	0	0
Solyc00g175240.1.1	0	0	0	0	0	0	0	0	0	0	0	0
Solyc00g178340.1.1	0	0	0	0	0	0	0	0	0	0	0	0
Solyc00g179240.1.1	2.44946	2.29929	4.99055	2.46502	3.71232	2.62881	2.40246	2.31316	0.441219	0.927343	0.771102	0.942039
Solyc00g179640.1.1	0	0.102953	0	0	0	0	0	0	0	0	0	0
Solyc00g179840.1.1	0	0	0	0	0	0	0	0	0	0	0	0
Solyc00g180440.1.1	0	0	0	0	0	0	0	0	0	0	0	0
Solyc00g180840.1.1	0	0	0	0	0	0	0	0	0	0	0	0
Solyc00g181240.1.1	0	0	0	0	0	0	0	0.0593119	0	0	0	0
Solyc00g181250.2.1	0	0	0	0	0.106066	0	0	0	0	0	0	0
Solyc00g183050.1.1	0.0942101	0.102953	0	0.186744	0	0.0657202	0.171604	0.177936	0	0.115918	0	0.0942039
Solyc00g183550.1.1	0	0	0	0	0	0	0	0	0	0	0	0
Solyc00g184350.2.1	9.3268	8.61377	9.98111	8.47819	6.04579	9.79231	10.0102	10.5279	6.28737	9.53425	6.16881	8.57256
Solyc00g185750.1.1	0	0	0	0	0	0	0	0	0	0	0	0
Solyc00g185850.1.1	0	0	0	0	0	0	0	0	0	0	0	0
Solyc00g186050.1.1	33.1619	23.8166	33.6862	25.3599	39.4567	30.3627	25.283	23.0427	29.0102	21.184	30.5013	26.6597
Solyc00g187050.2.1	0	0	0	0	0	0	0	0	0	0	0	0
Solyc00g188250.1.1	0	0	0	0	0	0	0	0	0	0	0	0
Solyc00g188750.1.1	0	0	0	0	0	0	0	0	0	0	0	0
Solyc00g188850.2.1	0.0942101	0.205907	0.155955	0.0373488	0	0	0	0.0593119	0	0.0289795	0.0856779	0.0942039
Solyc00g192150.2.1	0	0	0	0	0	0	0	0	0	0	0	0
Solyc00g195350.1.1	0	0	0	0	0	0	0	0	0	0	0	0
Solyc00g195360.1.1	0	0	0	0	0	0	0	0	0	0	0	0
Solyc00g196060.2.1	182.579	163.559	154.083	178.527	231.119	240.273	307.114	302.669	160.824	150.896	289.591	298.093
Solyc00g196460.1.1	0	0	0	0	0	0	0	0	0	0	0	0
Solyc00g198360.1.1	0	0	0	0	0	0	0	0	0	0	0	0
Solyc00g199960.1.1	0	0	0	0	0	0	0	0	0	0	0	0
Solyc00g201060.1.1	0	0	0	0	0	0	0	0	0	0	0	0
Solyc00g201160.2.1	3.01472	2.36793	2.02741	3.43609	3.39412	3.08885	3.14608	3.26215	2.2061	3.94121	3.08441	3.10873
Solyc00g201460.1.1	0	0	0	0	0	0	0	0	0	0	0	0
Solyc00g201760.1.1	0	0	0	0	0	0	0	0	0	0	0	0
Solyc00g202560.1.1	0	0	0	0	0	0	0	0	0	0	0	0
Solyc00g203660.1.1	0	0	0	0	0	0	0	0	0	0	0	0
Solyc00g206460.1.1	3.48577	1.95612	2.80719	2.20358	3.50019	2.49737	3.66089	2.58007	2.3164	3.01386	5.8261	3.23434
Solyc00g207960.1.1	0	0	0	0	0	0	0	0	0	0	0	0
Solyc00g209460.1.1	0.0942101	0.137271	0.467864	0.298791	0.106066	0.262881	0.343209	0.14828	0.330914	0.231836	0.257034	0.25121
Solyc00g209560.1.1	0	0	0	0	0	0	0	0	0	0	0	0
Solyc00g210860.1.1	0	0	0	0	0	0	0	0	0	0.0579589	0	0
Solyc00g212260.1.1	0	0	0	0	0	0	0	0	0	0	0	0
Solyc00g213960.1.1	0	0	0	0	0	0	0	0	0	0	0	0
Solyc00g215560.1.1	0.0942101	0.0686356	0	0	0.106066	0	0.0572014	0.0889678	0	0.144897	0	0.125605
Solyc00g217560.1.1	0	0	0	0	0	0	0	0	0	0	0	0
Solyc00g217960.1.1	0.37684	0.240225	0.467864	0.448186	0.212133	0.525761	0.40041	0.237248	0.661829	0.782446	1.11381	0.565224
Solyc00g218560.1.1	0	0.0343178	0	0	0	0	0	0	0	0	0	0
Solyc00g220360.1.1	0	0	0	0	0	0	0	0	0	0	0	0
Solyc00g222060.1.1	0	0	0	0	0	0	0	0	0	0	0	0
Solyc00g222460.1.1	0	0	0	0	0	0	0	0	0	0	0	0
Solyc00g226760.1.1	0	0	0	0	0	0	0	0	0	0	0	0
Solyc00g227860.1.1	6.97154	8.64809	10.293	7.61916	4.56086	6.96634	7.8366	7.4733	9.48621	10.7804	8.56779	10.8963
Solyc00g227960.1.1	0	0	0	0	0	0	0	0	0	0	0	0
Solyc00g228260.1.1	0	0	0	0	0	0	0	0	0	0	0	0
Solyc00g229260.1.1	0	0	0	0	0	0	0	0	0	0	0	0
Solyc00g230060.1.1	0	0.171589	0	0.0746977	0	0.262881	0.228806	0.0296559	0	0.144897	0.342712	0
Solyc00g230070.1.1	0	0	0	0	0	0	0	0	0	0.0289795	0.171356	0
Solyc00g230080.1.1	0.28263	0.137271	0.31191	0.149395	0	0.0657202	0.171604	0.207592	0	0.0869384	0.0856779	0.0314013
Solyc00g230280.1.1	0	0	0	0	0	0	0	0	0	0	0	0
Solyc00g231680.1.1	0	0	0	0	0	0	0	0.0593119	0.22061	0.0579589	0	0
Solyc00g231780.1.1	0.65947	0.377496	0.31191	0.149395	0.318199	0.197161	0.171604	0.504151	0	0.376733	0.514068	0.282612
Solyc00g233480.1.1	0.0942101	0.0686356	0	0	0	0	0	0	0	0	0	0
Solyc00g237680.1.1	0	0	0	0	0	0	0	0	0	0	0	0
Solyc00g240580.1.1	0	0	0	0	0	0	0	0	0	0	0	0
Solyc00g244280.1.1	0.0942101	0	0	0	0	0.262881	0.114403	0.0296559	0	0.289795	0.171356	0.0314013
Solyc00g244290.1.1	1.50736	0.343178	2.33932	0.298791	1.2728	0.657202	0.743619	0.415183	0.22061	1.44897	1.11381	0.282612
Solyc00g244300.1.1	2.73209	0.995217	4.21078	1.34456	4.34872	1.57728	1.60164	1.30486	0.441219	1.73877	2.3133	0.785033
Solyc00g245200.1.1	0	0	0	0	0	0	0	0	0	0	0	0
Solyc00g246800.1.1	0	0	0	0	0	0	0	0	0	0	0	0
Solyc00g247300.2.1	0	0	0	0	0	0	0.114403	0	0.22061	0.173877	0.257034	0.125605
Solyc00g249200.1.1	0	0	0	0	0	0	0	0	0	0	0	0
Solyc00g249900.2.1	0.56526	0.857945	0.779774	0.821674	0.742465	1.18296	0.572014	0.504151	0.551524	0.52163	0.42839	0.502421
Solyc00g249910.1.1	0	0	0	0	0	0	0	0	0	0	0	0
Solyc00g254110.1.1	0	0	0	0	0	0	0	0	0	0	0	0
Solyc00g254910.1.1	0	0	0	0	0	0	0	0	0	0	0	0
Solyc00g255510.1.1	0	0	0	0	0	0	0	0	0	0	0	0
Solyc00g256710.1.1	5.46418	2.84838	4.21078	3.43609	4.34872	3.15457	5.09093	4.77461	4.41219	3.91223	3.76983	4.11357
Solyc00g257110.2.1	0.0942101	0.102953	1.09168	0.261442	0.742465	0.262881	0.228806	0.177936	0.110305	0.405713	0	0.314013
Solyc00g263210.1.1	0	0	0	0	0	0	0	0	0	0	0	0
Solyc00g265110.2.1	0	0	0	0	0	0	0	0	0	0	0	0
Solyc00g265510.1.1	0	0	0	0	0	0	0	0	0	0	0	0
Solyc00g266110.1.1	0	0	0	0	0	0	0	0	0	0	0	0
Solyc00g268310.1.1	0	0	0	0	0	0	0	0	0	0	0	0
Solyc00g269810.1.1	0	0	0	0	0	0	0	0	0	0	0	0
Solyc00g270510.1.1	0.28263	0.205907	0.155955	0.261442	0.742465	0.394321	0.171604	0.237248	0	0.231836	0.0856779	0.125605
Solyc00g272810.1.1	0	0.0686356	0	0	0	0	0	0	0	0	0	0
Solyc00g273110.1.1	3.10893	4.94176	8.10965	5.19149	4.45479	4.73185	5.03373	5.21945	5.18432	3.59345	4.45525	4.42758
Solyc00g275310.1.1	0	0	0	0	0	0	0	0	0	0	0	0
Solyc00g277510.1.1	0.18842	0.137271	0.155955	0.149395	0.106066	0	0.0572014	0.0296559	0	0.0579589	0.0856779	0.0314013
Solyc00g278110.2.1	0	0.137271	0.31191	0	0	0	0.114403	0.118624	0.22061	0.0869384	0	0.125605
Solyc00g280110.1.1	0	0.137271	0	0.0373488	0	0	0	0	0	0	0	0
Solyc00g281110.1.1	0	0.0686356	0	0	0	0	0	0	0	0.0289795	0.0856779	0
Solyc00g282510.1.1	0.0942101	0.171589	1.09168	0.709628	0.954598	0.525761	0.972424	1.0083	1.32366	2.46325	0.942457	0.785033
Solyc00g283010.1.1	0	0	0	0	0	0	0	0	0	0	0	0
Solyc00g283110.1.1	0	0	0	0	0	0	0	0	0	0	0	0
Solyc00g284510.1.1	0	0	0	0	0	0	0	0	0	0	0	0
Solyc00g286010.1.1	0	0	0	0	0	0	0	0	0	0	0	0
Solyc00g286020.1.1	0	0	0	0	0	0	0	0	0	0	0	0
Solyc00g286030.1.1	0	0	0	0	0	0	0	0	0	0	0	0
Solyc00g287330.1.1	0	0	0	0	0	0	0	0	0	0	0	0
Solyc00g289230.1.1	0.37684	0.480449	0.623819	0.448186	0.318199	0.722922	0.629216	0.741399	0.772133	0.579589	0.599746	0.565224
Solyc00g294230.1.1	0	0	0	0	0	0.0657202	0	0	0	0	0	0.0628026
Solyc00g294630.1.1	0	0	0	0	0	0	0	0	0	0	0	0
Solyc00g297330.1.1	0	0	0	0	0	0	0	0	0	0	0	0
Solyc00g300430.1.1	0	0	0	0	0	0	0	0	0	0	0	0
Solyc00g300730.1.1	0	0	0	0	0	0	0	0	0	0	0	0
Solyc00g303630.1.1	0	0	0	0	0	0	0	0	0	0	0	0
Solyc00g304030.1.1	0	0	0	0.0373488	0	0	0	0	0	0	0	0
Solyc00g304630.1.1	0	0	0	0	0	0	0	0	0	0	0	0
Solyc00g306730.1.1	0	0	0	0	0	0	0	0	0	0	0	0
Solyc00g306830.1.1	0	0	0	0	0	0	0	0	0	0	0	0
Solyc00g308530.1.1	0	0	0	0	0	0	0	0	0	0	0	0
Solyc00g308930.1.1	0	0	0	0	0	0	0	0	0	0	0	0
Solyc00g309530.1.1	0	0	0	0	0	0	0	0.0593119	0	0	0	0
Solyc00g311230.2.1	8.00785	6.00562	8.88942	7.39507	10.8188	6.24342	6.97857	9.07472	6.06676	5.2163	6.51152	5.65224
Solyc00g313030.1.1	0	0	0	0	0	0	0	0	0	0	0	0
Solyc00g313530.1.1	0	0	0	0	0	0	0	0	0	0	0	0
Solyc00g313930.1.1	0	0	0	0	0	0	0	0	0	0	0	0
Solyc00g316030.1.1	0	0	0	0	0	0	0	0	0	0	0	0
Solyc00g316530.1.1	0.37684	0.102953	0	0.112047	0.424266	0.0657202	0.343209	0.0593119	0.22061	0.492651	0.685424	0.188408
Solyc00g316730.1.1	0	0	0	0	0	0	0	0	0	0	0	0
Solyc00g318030.1.1	0	0	0	0	0	0	0	0	0	0	0	0
Solyc00g318130.1.1	0	0	0	0	0	0	0	0	0	0	0	0
Solyc00g318830.1.1	0	0	0	0	0	0	0	0	0	0	0	0
Solyc00g320430.1.1	1.31894	1.16681	1.09168	1.19516	0.848531	0.920083	1.60164	0.94899	0.661829	1.44897	0.942457	0.942039
Solyc00g322630.1.1	0	0	0	0	0	0	0	0	0	0	0	0
Solyc00g322830.1.1	0	0	0	0	0	0	0	0	0	0	0	0
Solyc00g323130.2.1	0.18842	0.274542	0	0.112047	0	0.0657202	1.65884	1.69039	1.54427	1.85469	2.05627	2.4807
Solyc00g324530.1.1	0	0	0	0	0	0	0	0	0	0	0	0
Solyc01g005000.2.1	6.87733	4.59859	3.89887	4.818	6.04579	4.66613	20.9929	21.7378	23.0537	23.7632	59.1178	67.2616
Solyc01g005010.2.1	11.7763	10.364	14.6598	11.9143	17.8192	10.5809	7.26458	9.87543	0.772133	0.695507	1.11381	0.879237
Solyc01g005020.2.1	61.7076	63.9341	50.2174	56.1353	52.715	52.5761	55.7714	59.8457	49.6371	53.2643	64.7725	62.363
Solyc01g005030.2.1	39.9451	39.7057	41.1721	45.6029	43.6994	43.5068	37.1237	44.3356	40.4819	42.8317	41.2968	41.3555
Solyc01g005040.2.1	0.18842	0.102953	0	0.0746977	0.106066	0.0657202	0	0	0.110305	0.0289795	0	0
Solyc01g005050.2.1	0	0	0	0	0	0	0	0	0	0	0	0
Solyc01g005060.2.1	1.22473	1.64725	1.7155	0.933721	1.591	0.788642	0.228806	0.385527	0.661829	0.724487	0.42839	0.408217
Solyc01g005070.2.1	0.37684	0.0686356	0.155955	0.149395	0	0.0657202	0.0572014	0.118624	0	0.0579589	0	0.0314013
Solyc01g005080.2.1	27.1325	32.8765	36.6494	38.9548	32.1381	32.2686	32.09	35.7651	25.0392	25.8497	32.3863	30.1767
Solyc01g005090.2.1	0	0	0	0	0	0	0	0	0	0	0	0
Solyc01g005100.2.1	9.98627	9.95217	10.293	8.1047	8.48531	8.67506	8.0082	8.18504	8.82438	7.94037	10.2814	7.50491
Solyc01g005110.2.1	5.18155	5.93698	6.39415	4.48186	5.40939	5.71766	4.80492	4.7153	6.61829	6.11467	6.85424	6.24886
Solyc01g005120.2.1	12.3415	12.6976	12.7883	10.1962	12.0916	11.4353	14.0716	15.0949	10.0377	12.635	18.3351	19.0292
Solyc01g005130.2.1	7.25417	6.07425	9.98111	7.99265	4.87905	5.12617	2.34526	3.2325	1.10305	1.39101	2.74169	3.42274
Solyc01g005140.2.1	0	0	0	0	0	0	0	0	0	0	0	0
Solyc01g005150.2.1	0	0	0	0	0	0	0	0	0	0	0	0
Solyc01g005160.2.1	0	0	0	0	0	0	0	0	0	0	0	0
Solyc01g005170.1.1	0.0942101	0.205907	0.467864	0.373488	0.318199	0.460041	0.171604	0.266904	0.330914	0.144897	0.0856779	0.219809
Solyc01g005180.1.1	0.56526	0.686356	0.623819	1.00842	0.848531	0.657202	0.686417	0.622775	0.441219	0.434692	0.856779	0.72223
Solyc01g005190.1.1	0.18842	0.446132	0.623819	0.298791	0.424266	0.460041	0.514813	0.504151	0.330914	0.434692	0.771102	0.502421
Solyc01g005200.1.1	0.28263	0.102953	0.155955	0	0.106066	0.0657202	0	0.0593119	0	0	0	0
Solyc01g005210.2.1	83.9412	88.2311	103.71	95.0528	87.6108	88.788	85.1729	90.9845	107.437	123.568	98.7867	110.124
Solyc01g005220.2.1	0.0942101	0	0	0	0	0	0	0	0	0.0579589	0.0856779	0.0628026
Solyc01g005230.2.1	0	0	0	0	0	0.0657202	0	0	0.110305	0	0	0
Solyc01g005240.2.1	69.2444	74.2981	58.0152	59.1606	56.6395	70.3863	75.2199	72.5385	78.8679	84.5331	73.9401	75.4574
Solyc01g005250.2.1	113.052	112.734	99.4992	111.113	107.021	100.552	83.3997	91.7259	109.202	107.92	92.7892	89.5251
Solyc01g005260.2.1	3.10893	2.40225	4.52269	2.83851	3.07593	1.57728	2.11645	2.758	2.4267	3.12978	1.97059	2.4807
Solyc01g005270.2.1	14.791	16.85	14.0359	12.8853	11.3491	10.4495	13.2135	13.5824	6.8389	7.33181	7.28263	8.82377
Solyc01g005280.2.1	5.55839	3.84359	5.61437	4.33246	3.50019	2.30021	3.08888	2.87663	2.97823	2.37632	3.17008	3.01453
Solyc01g005290.2.1	19.2189	18.7032	19.6503	19.0479	7.95498	7.1635	4.57611	6.22775	2.64731	2.37632	5.8261	3.92516
Solyc01g005300.2.1	2.26104	2.19634	2.49528	3.51079	4.24266	4.20609	7.15018	7.29536	5.51524	8.46201	8.65347	7.88173
Solyc01g005310.2.1	0	0.0686356	0	0	0	0	0	0	0	0.0289795	0	0.0628026
Solyc01g005320.2.1	0.0942101	0.205907	0.467864	0.63493	0.742465	0.657202	0.572014	0.296559	0.110305	0.376733	1.28517	0.596625
Solyc01g005330.2.1	228.177	233.361	244.069	222.114	238.437	226.077	230.979	236.892	206.711	215.868	233.986	233.689
Solyc01g005340.2.1	8.57312	8.51082	6.86201	9.52395	7.95498	7.42638	7.951	9.223	8.71408	8.14323	9.93864	9.16918
Solyc01g005350.2.1	0	0.0686356	0	0	0.106066	0.0657202	0	0.0593119	0.110305	0.260815	0.171356	0.0314013
Solyc01g005360.2.1	0	0	0	0	0	0	0	0	0	0.0579589	0.0856779	0
Solyc01g005370.2.1	1.13052	0.514767	1.09168	0.522884	0.530332	1.05152	0.915223	0.593119	0.882438	0.608569	0.685424	0.533822
Solyc01g005380.2.1	20.632	18.8062	13.88	18.1515	17.7131	16.7586	17.2176	18.8908	17.8694	20.0248	19.2775	20.4737
Solyc01g005390.2.1	0	0	0	0	0	0	0	0	0	0.115918	0	0.0314013
Solyc01g005400.2.1	0	0	0	0	0	0	0	0	0	0	0	0
Solyc01g005410.2.1	0.847891	0.754992	0.935729	0.373488	0.106066	0.328601	0.286007	0.326215	0	0.173877	0.0856779	0.188408
Solyc01g005420.2.1	0	0	0	0	0	0	0	0	0	0	0	0
Solyc01g005430.2.1	6.21786	7.72151	5.61437	6.53605	5.19725	6.76918	8.23701	9.43059	7.28011	6.66528	6.34017	6.59428
Solyc01g005440.2.1	124.357	114.519	127.883	133.634	145.417	129.797	239.274	229.418	246.862	264.38	250.265	280.005
Solyc01g005450.2.1	0.65947	0.30886	0.779774	0.186744	0	0.328601	0	0.207592	0.551524	0.202856	0.0856779	0.282612
Solyc01g005460.2.1	12.0589	11.7367	10.7609	10.3456	8.16711	9.00366	10.6967	10.8837	9.59652	10.9832	11.3952	9.16918
Solyc01g005470.2.1	0	0	0.31191	0	0	0	0	0	0	0	0	0.0314013
Solyc01g005480.2.1	29.9588	28.827	25.8885	28.6092	26.4105	29.5741	31.1748	33.3629	29.4514	25.9366	28.4451	26.8795
Solyc01g005490.2.1	18.1825	19.0121	20.8979	19.9443	17.3949	20.0447	19.6201	19.0391	21.1785	21.2999	19.8773	17.5533
Solyc01g005500.2.1	0.18842	0	0	0	0.106066	0	0	0	0	0.0579589	0	0.0942039
Solyc01g005510.2.1	0.0942101	0.171589	0	0.186744	0.212133	0	0.343209	0.355871	0.22061	0.0869384	0.171356	0.125605
Solyc01g005520.2.1	14.4141	15.546	13.1002	11.6528	7.95498	9.20083	9.72424	9.6975	10.6996	10.2877	8.48212	7.63052
Solyc01g005530.2.1	7.15996	7.30969	5.14651	6.19991	3.81839	5.32333	6.12055	5.90153	6.8389	7.07099	6.85424	4.96141
Solyc01g005540.2.1	25.3425	23.2332	21.5218	21.5876	19.9405	20.6361	21.3361	21.7675	24.4877	21.5028	22.0192	20.9133
Solyc01g005550.2.1	311.929	320.563	257.481	284.411	216.163	267.153	236.757	249.436	228.993	236.415	213.081	197.483
Solyc01g005560.2.1	144.707	139.571	106.985	107.938	133.325	162.46	299.85	265.035	162.589	166.661	231.502	247.819
Solyc01g005570.2.1	17.9941	18.6689	17.6229	16.3588	16.2282	14.9842	16.5312	15.3025	21.73	18.0542	16.8786	15.3238
Solyc01g005580.2.1	20.3494	17.8796	15.5955	13.8564	13.6826	14.9842	18.7621	18.2088	20.2961	20.4595	18.5064	17.0823
Solyc01g005590.2.1	10.0805	7.92741	17.6229	6.08786	15.1675	7.42638	6.97857	7.08777	6.17707	5.30324	7.79669	6.06045
Solyc01g005600.2.1	42.3945	44.3043	43.0435	41.4199	38.5021	37.3948	42.1003	44.6619	37.8345	36.9198	39.1548	39.4086
Solyc01g005610.2.1	0	0	0	0	0	0.13144	0	0.0593119	0	0.0289795	0.0856779	0
Solyc01g005620.2.1	483.957	493.696	494.533	459.204	478.572	450.709	492.39	478.173	580.313	627.406	535.83	545.095
Solyc01g005630.1.1	0	0	0	0	0	0	0	0	0	0	0	0
Solyc01g005640.2.1	22.0452	21.0711	24.4849	22.8575	16.5464	19.1903	20.1921	20.2254	19.5239	20.1407	21.5908	21.8867
Solyc01g005650.1.1	0	0	0	0	0	0	0	0	0	0	0	0
Solyc01g005660.1.1	0	0	0	0	0	0	0	0	0	0	0	0
Solyc01g005670.2.1	6.02944	8.61377	6.39415	7.58181	6.89432	7.36066	7.20738	7.23605	8.82438	7.07099	7.88237	6.12326
Solyc01g005680.2.1	0	0	0	0	0	0	0	0	0.110305	0	0	0
Solyc01g005690.2.1	35.7998	41.7991	38.9887	39.9633	41.7902	42.4552	47.6488	45.8778	39.7097	35.239	34.2712	34.9183
Solyc01g005700.2.1	33.2562	37.6123	42.8876	38.5066	34.7898	40.4179	40.3842	42.4673	36.2903	36.8329	37.3556	38.184
Solyc01g005710.2.1	0	0	0	0	0	0	0	0	0	0	0	0
Solyc01g005720.2.1	0	0	0	0	0	0	0	0	0	0	0	0
Solyc01g005730.2.1	0	0	0	0	0	0	0	0	0	0	0	0
Solyc01g005740.2.1	0	0	0	0	0	0	0	0.0296559	0	0	0	0
Solyc01g005750.1.1	0	0	0	0	0	0	0	0	0	0	0	0
Solyc01g005760.2.1	0.0942101	0.171589	0.31191	0.112047	0.106066	0.13144	0.0572014	0.0593119	0.441219	0.318774	0.0856779	0.0628026
Solyc01g005770.2.1	3.86261	4.56427	6.39415	5.37823	5.09119	5.65194	3.8897	4.09252	5.51524	4.31794	4.36958	3.73676
Solyc01g005780.1.1	0.28263	0.514767	0.31191	0.33614	0.318199	0.788642	0.457611	0.652431	0.551524	0.289795	0.257034	0.408217
Solyc01g005790.1.1	11.3994	16.0607	13.1002	15.2757	14.6372	15.3785	14.5292	14.2052	12.1335	14.3159	15.6791	13.22
Solyc01g005800.2.1	3.95682	4.56427	2.49528	3.43609	1.69706	3.68033	3.8897	4.30011	3.75036	4.28896	3.68415	3.61115
Solyc01g005810.2.1	79.6075	93.8249	84.8394	80.0012	70.4281	82.1502	100.16	95.3735	81.7358	80.1862	86.6204	77.8439
Solyc01g005820.2.1	402.277	395.307	484.084	430.333	522.589	457.544	470.711	436.832	386.949	368.851	392.919	399.707
Solyc01g005830.2.1	95.529	91.9374	100.279	91.6914	92.0656	92.7312	79.7388	86.0319	59.1234	52.5688	63.4017	61.735
Solyc01g005840.2.1	12.5299	10.7415	10.449	8.32879	10.7127	9.26655	9.26663	9.25266	9.1553	9.50527	9.42457	8.88657
Solyc01g005850.1.1	1.69578	1.57862	1.7155	1.41926	2.43953	1.97161	1.83045	1.86832	0.882438	1.39101	2.82737	1.47586
Solyc01g005860.2.1	0.0942101	0.343178	0.155955	0.149395	0.106066	0.262881	0.286007	0.207592	0.110305	0.231836	0.257034	0.125605
Solyc01g005870.1.1	0	0	0	0	0	0	0	0	0	0	0.0856779	0
Solyc01g005880.1.1	0	0	0	0	0	0	0	0	0	0	0	0
Solyc01g005890.1.1	0	0	0	0	0	0	0	0	0	0	0	0
Solyc01g005900.2.1	3.67419	2.36793	2.96314	1.94214	1.48493	2.16877	1.65884	1.86832	3.08853	2.43428	2.48466	2.04109
Solyc01g005910.2.1	13.2836	13.933	12.6323	13.707	9.65204	12.4868	12.6987	13.3748	7.16981	9.67914	10.7954	10.6136
Solyc01g005920.2.1	3.86261	3.15724	4.52269	3.66019	4.13659	3.02313	4.1185	4.38908	1.87518	2.37632	2.48466	2.70051
Solyc01g005930.2.1	3.39156	4.32404	3.89887	3.80958	3.18199	4.20609	3.37488	3.20284	5.29463	4.11508	3.08441	2.82612
Solyc01g005940.2.1	0	0	0	0	0	0	0	0.0593119	0	0	0	0
Solyc01g005950.2.1	55.6781	54.9085	56.2997	51.7281	49.533	51.1303	53.5405	54.8932	55.373	52.6267	56.9758	49.4885
Solyc01g005960.2.1	163.925	163.49	176.385	178.117	177.449	171.595	159.764	158.837	173.178	185.034	197.231	191.203
Solyc01g005970.2.1	15.9215	17.0216	18.4027	17.1431	16.6524	15.1156	14.5864	16.6666	14.3396	14.5767	14.2225	16.0775
Solyc01g005980.2.1	8.29049	7.65287	6.23819	7.09628	5.93972	6.70346	7.66499	6.88018	10.8099	10.4036	5.99746	6.71988
Solyc01g005990.2.1	21.9509	23.2675	16.0633	15.7612	12.6219	18.0731	14.3576	16.6073	21.2888	22.2852	11.8236	12.5291
Solyc01g006000.2.1	37.4014	41.6618	38.8327	44.0343	39.1385	40.5494	41.185	37.3368	27.3556	27.7044	28.9591	27.4761
Solyc01g006010.2.1	32.9735	36.1023	32.5946	35.4067	37.3354	37.1319	38.8398	39.2348	42.1364	44.3676	34.1855	39.7227
Solyc01g006020.2.1	17.7115	19.9043	15.1276	23.2683	15.3796	17.3501	20.3637	21.2337	18.7518	29.5011	19.0205	27.6646
Solyc01g006030.2.1	16.2041	16.5755	14.3478	15.6118	19.092	16.4958	16.4168	17.2894	16.2148	16.4314	17.7353	14.8528
Solyc01g006040.2.1	16.8636	15.3401	12.6323	17.1058	13.8947	15.0499	15.1012	15.2135	14.0087	15.7938	14.9936	16.8311
Solyc01g006050.2.1	0	0	0.155955	0	0	0	0	0	0	0	0	0
Solyc01g006060.2.1	0	0	0	0	0	0	0	0	0	0	0	0
Solyc01g006070.2.1	0	0	0	0	0	0	0	0	0	0	0	0
Solyc01g006080.1.1	0	0	0.155955	0	0	0.13144	0	0.0889678	0	0.0579589	0.171356	0.0628026
Solyc01g006090.2.1	11.8705	11.5994	13.4121	11.2793	14.319	13.9984	15.6732	14.3238	13.6778	14.5767	14.3082	13.7852
Solyc01g006100.2.1	202.175	210.437	188.237	180.171	173.949	183.556	186.191	197.864	155.971	164.169	168.957	172.173
Solyc01g006110.2.1	55.3955	55.1144	53.1806	51.7281	55.4727	54.022	55.8858	53.1731	54.8215	54.8871	54.5769	60.6987
Solyc01g006120.2.1	336.989	350.351	370.705	402.135	348.64	362.578	340.177	354.003	327.274	327.874	305.785	333.042
Solyc01g006130.2.1	6.78312	8.30491	8.2656	6.98423	4.03052	6.1777	5.43414	5.63463	6.06676	6.75222	6.85424	5.14982
Solyc01g006140.2.1	13.001	14.1389	13.724	9.86009	12.4098	11.6325	15.7304	11.6548	17.9797	14.113	11.2238	14.8214
Solyc01g006150.2.1	29.7704	34.7296	33.0624	27.4887	28.0015	30.0998	27.5711	28.0545	32.7605	31.5876	27.0742	25.4037
Solyc01g006160.2.1	478.587	410.441	520.733	393.956	515.165	479.494	487.185	416.844	558.804	436.199	539.857	487.6
Solyc01g006170.2.1	44.1845	40.7696	41.328	32.9043	35.9565	41.9952	50.1657	43.9205	35.5181	47.0337	49.1791	49.0174
Solyc01g006180.2.1	29.9588	31.6753	31.3469	29.9911	29.5925	30.9542	38.0962	36.1506	36.18	36.3692	35.4707	35.1695
Solyc01g006190.2.1	232.51	269.258	297.094	319.034	272.379	297.121	292.929	275.8	179.576	180.281	233.815	210.42
Solyc01g006200.2.1	1.50736	1.26976	0	0.97107	0.530332	0.920083	0.572014	0.741399	0.110305	0.434692	0.171356	0.188408
Solyc01g006210.2.1	19.5957	19.8357	20.8979	18.2636	19.9405	20.3075	22.2514	18.0605	20.8476	18.2281	19.1919	18.8094
Solyc01g006220.2.1	27.0383	28.6897	24.017	27.2646	25.6681	31.4142	29.4015	29.3001	27.6865	26.806	27.931	24.3674
Solyc01g006230.2.1	44.3729	45.5054	48.5019	43.6234	48.3663	41.0751	47.0196	45.3439	40.0406	40.5423	44.0385	42.172
Solyc01g006240.2.1	0	0.0343178	0	0	0	0	0	0	0	0	0	0
Solyc01g006250.1.1	1.31894	1.26976	2.49528	1.4566	1.591	2.10305	1.83045	1.66073	1.54427	1.39101	1.62788	1.72707
Solyc01g006260.2.1	7.34838	9.47172	10.7609	8.77698	12.4098	9.98947	10.3535	9.66784	10.3686	7.85344	9.68161	9.10638
Solyc01g006270.2.1	0	0	0	0	0	0	0	0	0	0	0	0
Solyc01g006280.2.1	129.539	121.039	106.517	111.15	102.884	103.969	109.598	112.129	105.782	106.529	120.12	123.847
Solyc01g006290.2.1	0	0.0343178	0	0	0	0.0657202	0.0572014	0	0.110305	0.144897	0.171356	0.282612
Solyc01g006300.2.1	0.0942101	0.0686356	0	0	0	0.13144	0.0572014	0.0296559	0.110305	0.202856	0.0856779	0.47102
Solyc01g006310.2.1	0	0	0	0	0	0	0	0	0	0	0	0
Solyc01g006320.2.1	3.10893	3.87791	2.18337	2.12888	2.43953	1.18296	1.31563	1.60142	2.75762	2.55019	1.45653	2.22949
Solyc01g006330.2.1	7.34838	6.9322	5.61437	6.12521	4.34872	3.81177	3.66089	3.38078	3.52975	2.78203	3.42712	3.04593
Solyc01g006340.2.1	13.7547	14.5851	13.88	14.1179	16.6524	14.8528	15.2156	16.1032	18.5312	15.9097	17.3069	15.5751
Solyc01g006350.2.1	193.131	214.521	179.66	215.503	185.722	225.552	212.389	230.872	189.945	192.424	204.342	203.7
Solyc01g006360.2.1	73.5781	68.6013	63.4736	69.917	66.3976	76.1697	60.2903	75.4151	69.9332	66.305	61.0027	84.9405
Solyc01g006370.2.1	847.514	875.55	699.925	842.291	721.888	837.341	745.678	861.624	773.567	782.272	764.847	821.772
Solyc01g006380.2.1	0	0	0	0	0	0	0	0	0	0	0	0
Solyc01g006390.2.1	67.9255	55.3889	92.7931	66.8918	150.614	98.3174	140.944	133.066	277.527	247.05	130.916	122.025
Solyc01g006400.2.1	534.83	521.322	461.938	421.631	658.248	605.217	920.371	809.963	1426.68	1263.45	1666.18	1611.92
Solyc01g006410.2.1	0.0942101	0	0.155955	0.0373488	0	0.13144	0	0.118624	0	0.0289795	0	0
Solyc01g006420.2.1	0	0	0.31191	0.0746977	0	0	0.228806	0.0593119	0	0.0579589	0.0856779	0.0628026
Solyc01g006430.2.1	463.325	493.25	549.897	660.813	680.946	609.686	818.552	711.891	953.916	1081.25	950.083	956.798
Solyc01g006440.1.1	0	0.0343178	0	0	0	0	0	0	0	0	0	0
Solyc01g006450.2.1	54.5476	62.3898	52.4008	49.3378	56.8516	55.1392	58.0022	60.1126	79.3091	69.8115	77.7099	73.9501
Solyc01g006460.1.1	0.28263	0	0	0	0	0	0	0	0	0	0	0
Solyc01g006470.1.1	0	0	0	0	0	0	0	0	0	0	0	0
Solyc01g006480.2.1	18.0883	19.6641	15.9074	17.5913	18.3495	21.9505	22.8234	19.8991	20.7373	18.8367	18.7635	18.8722
Solyc01g006490.2.1	14.1315	14.9626	15.7514	15.0142	14.6372	16.1672	15.5588	15.4507	14.7808	15.7648	15.7647	16.0775
Solyc01g006500.2.1	12.3415	13.6928	12.1645	14.0058	12.6219	12.7497	12.0123	13.3452	14.119	13.2436	13.023	12.2465
Solyc01g006510.2.1	44.844	42.76	48.6579	50.2715	52.0786	46.0041	42.2719	39.4721	44.2322	47.3525	40.7827	43.2082
Solyc01g006520.2.1	1.8842	0.995217	1.7155	1.94214	0.848531	2.16877	1.83045	1.09727	1.43396	3.36162	2.65602	2.4807
Solyc01g006530.1.1	0	0	0	0	0	0	0	0	0	0	0	0
Solyc01g006540.2.1	0.0942101	1.06385	1.7155	0.97107	2.33346	1.24868	1.37283	1.30486	6.72859	7.33181	6.85424	2.82612
Solyc01g006550.2.1	0	0	0	0	0	0	0	0	0	0	0	0
Solyc01g006560.2.1	0	0	0	0	0	0	0	0	0	0.0289795	0	0
Solyc01g006570.1.1	0	0	0	0	0	0	0	0	0	0	0	0
Solyc01g006580.2.1	0	0	0	0	0	0	0	0	0	0.0579589	0.0856779	0.0628026
Solyc01g006590.1.1	0	0	0	0	0	0	0	0	0	0	0	0
Solyc01g006600.1.1	0	0	0	0	0	0	0	0	0	0	0	0
Solyc01g006610.1.1	0	0	0	0	0	0	0	0	0	0	0	0
Solyc01g006620.2.1	0	0	0	0	0	0	0	0	0	0	0	0.0314013
Solyc01g006630.2.1	58.0334	59.7473	56.9235	57.928	62.261	60.0682	59.9471	60.3202	56.9173	58.8283	55.1766	62.677
Solyc01g006640.1.1	0	0	0	0	0	0	0	0	0	0	0	0
Solyc01g006650.1.1	4.99313	7.34401	8.57751	7.73121	5.51545	9.72659	7.09298	6.85052	5.84615	6.81018	7.28263	6.65708
Solyc01g006660.1.1	5.18155	5.28494	6.86201	5.67702	6.78825	10.7781	98.5581	78.9441	101.149	72.1879	235.529	208.316
Solyc01g006670.2.1	0.47105	0.102953	0.935729	0.373488	0.318199	0.657202	1.88765	2.13523	0.882438	1.65183	2.39898	2.88892
Solyc01g006680.2.1	19.7841	18.8405	22.6134	23.0442	21.1072	24.3822	31.8612	30.1008	20.4064	18.1991	20.7341	16.1717
Solyc01g006690.2.1	10.5515	11.119	8.42156	10.6444	6.15185	5.91482	3.54649	4.7153	2.86792	5.62202	3.17008	2.82612
Solyc01g006700.2.1	145.649	149.935	128.195	139.274	113.491	139.853	133.623	142.141	135.454	129.219	139.227	140.552
Solyc01g006710.2.1	60.8597	71.0379	66.1248	62.0364	53.5635	66.8374	71.6162	70.7591	63.5355	60.2193	63.2303	61.7036
Solyc01g006720.2.1	1.8842	2.05907	1.87146	0.97107	0.318199	0.328601	0.0572014	0	0.330914	0.260815	0	0.596625
Solyc01g006730.2.1	0.847891	1.20112	0.467864	1.6807	0.636398	0.985803	1.31563	0.860023	0.661829	1.15918	0.856779	0.502421
Solyc01g006740.2.1	13.1894	15.3401	18.0908	16.5455	14.0008	15.3128	13.4995	14.2052	22.9434	18.1991	16.3645	16.5799
Solyc01g006750.2.1	0	0	0	0	0	0	0	0	0	0	0	0
Solyc01g006760.2.1	0	0	0	0	0	0	0	0	0	0	0	0
Solyc01g006770.1.1	0	0	0	0	0	0	0	0	0	0	0	0
Solyc01g006780.2.1	6.31207	5.3879	9.82515	6.16256	8.80351	3.87749	2.63127	4.38908	3.30914	3.41958	2.74169	2.76332
Solyc01g006790.2.1	18.9362	15.2714	29.0076	16.6202	20.8951	16.8901	11.5547	12.6631	11.582	9.7371	9.42457	10.4566
Solyc01g006800.2.1	111.827	121.897	119.149	124.708	117.522	133.609	122.697	119.543	148.581	138.841	134.943	137.758
Solyc01g006810.2.1	20.3494	20.5221	20.586	22.4093	20.5769	22.2791	19.4485	17.7046	22.061	21.5028	16.5358	19.3118
Solyc01g006820.2.1	18.6536	14.2076	19.0265	15.5371	18.8798	17.153	16.1308	19.484	19.3033	18.373	14.1369	15.7949
Solyc01g006830.2.1	46.1629	41.8334	52.4008	47.1342	49.6391	43.9668	32.948	38.2562	33.2017	32.5439	32.6433	30.2709
Solyc01g006840.2.1	0	0	0	0	0	0	0	0	0	0	0	0
Solyc01g006850.1.1	5.84102	6.14289	3.74292	4.818	4.66692	5.78338	6.23496	5.87188	5.29463	5.94079	6.51152	5.11841
Solyc01g006860.2.1	14.6968	19.5612	21.0539	19.0106	18.1374	17.3501	16.8744	17.1708	15.0014	15.9677	20.8197	16.8625
Solyc01g006870.2.1	11.1168	14.688	14.6598	13.8938	15.0614	14.1956	13.9571	13.5231	14.8911	13.0118	12.4233	12.6233
Solyc01g006880.2.1	45.9745	50.0011	43.8233	55.5004	45.6086	52.0504	51.8817	56.7911	40.5922	43.2374	41.9822	44.056
Solyc01g006890.2.1	91.5722	96.2615	92.0133	105.025	85.5956	85.5677	86.889	91.5183	82.1771	83.8376	73.169	80.9212
Solyc01g006900.2.1	166.94	186.723	179.504	169.825	162.812	170.478	155.13	157.71	157.405	154.084	150.108	151.511
Solyc01g006910.2.1	0	0	0	0	0	0	0	0	0	0	0	0
Solyc01g006920.2.1	4.89892	5.42221	3.74292	4.33246	4.66692	5.5205	5.09093	4.74495	2.86792	3.21672	2.39898	3.73676
Solyc01g006930.2.1	12.9068	15.1685	19.4944	19.8696	23.0164	20.7019	11.1543	9.40094	4.08128	5.3612	4.96932	4.08217
Solyc01g006940.2.1	28.9225	27.1111	25.1087	25.5466	19.7284	27.0767	25.0542	25.86	25.701	22.7199	24.7609	21.4471
Solyc01g006950.2.1	0.18842	0.0686356	0.31191	0.112047	0.106066	0.262881	0	0.0296559	0	0.0869384	0.0856779	0.0628026
Solyc01g006960.2.1	50.8734	49.6922	50.8413	54.4546	44.8661	51.5903	54.7418	60.3795	41.4746	49.9896	51.6638	49.9595
Solyc01g006970.2.1	88.5575	94.6828	82.968	96.1732	86.232	86.2906	92.7235	94.7508	80.7431	82.2437	86.8774	82.554
Solyc01g006980.2.1	65.7586	61.978	56.7675	54.604	56.3213	64.8001	56.4006	59.2229	62.984	57.4373	61.7738	60.9499
Solyc01g006990.2.1	20.8204	23.9882	18.5586	24.5755	19.9405	21.2276	22.8806	24.7331	21.8403	22.2852	21.4195	21.3843
Solyc01g007000.2.1	0	0	0	0	0	0	0	0	0	0	0	0
Solyc01g007010.2.1	0.47105	0.171589	0.31191	0.261442	0.212133	0.262881	0.0572014	0.0593119	0	0.0289795	0	0.125605
Solyc01g007020.2.1	0.37684	0.583403	0.779774	0.261442	0.212133	0.262881	0	0.0296559	0.110305	0.144897	0	0.0628026
Solyc01g007030.2.1	0	0	0	0	0	0	0	0	0	0	0	0
Solyc01g007040.2.1	0	0	0	0	0	0	0	0	0	0	0	0
Solyc01g007050.1.1	0.0942101	0	0	0	0	0	0	0	0	0	0	0
Solyc01g007060.2.1	41.9235	49.5892	45.0709	42.9885	35.9565	45.6098	55.8858	53.0841	52.5051	57.2924	66.1434	59.1287
Solyc01g007070.2.1	9.51522	10.5356	11.2287	9.00107	10.1824	6.5063	6.74977	7.38433	5.51524	6.66528	7.62534	7.0653
Solyc01g007080.2.1	0.37684	0.30886	0.31191	0.112047	0.212133	0.0657202	0.0572014	0.0593119	0.110305	0.144897	0	0.25121
Solyc01g007090.1.1	0	0	0	0	0	0.0657202	0	0	0	0	0	0
Solyc01g007100.2.1	60.3886	62.6986	65.501	59.3099	49.0027	44.624	48.3352	51.5717	20.4064	22.4591	36.7558	35.1695
Solyc01g007110.2.1	35.7998	36.5485	39.7685	45.5282	49.533	45.6098	41.5282	40.5693	41.6952	39.528	51.8352	47.7928
Solyc01g007120.2.1	30.1472	35.7935	31.6588	33.2031	36.5929	32.7287	37.5813	37.5444	34.746	36.8909	37.1842	35.4835
Solyc01g007130.2.1	84.0354	86.9613	84.0596	81.047	82.9439	77.2212	82.5989	87.4257	42.5776	47.6422	56.2904	59.1601
Solyc01g007140.2.1	15.6389	16.7471	11.6966	13.3709	14.8493	14.5899	18.4761	18.9205	17.5385	18.5179	21.0768	22.6717
Solyc01g007150.2.1	177.021	178.693	137.864	158.77	145.311	169.624	165.655	180.279	147.588	168.197	165.53	174.434
Solyc01g007160.2.1	8.76154	9.88353	7.32988	7.39507	9.12171	9.46371	8.75182	7.2064	7.72133	8.54894	8.22508	8.91797
Solyc01g007170.2.1	119.553	109.542	92.3252	112.457	135.023	114.616	100.102	97.1232	116.592	100.53	95.6166	95.6798
Solyc01g007180.2.1	3.86261	3.94655	4.99055	4.10837	4.03052	4.14037	3.71809	4.53736	4.19158	4.69467	3.59847	3.04593
Solyc01g007190.2.1	1.60157	2.02475	2.65123	2.42767	2.65166	0.722922	1.94485	2.46144	3.97097	3.18774	1.62788	1.50726
Solyc01g007200.2.1	81.6801	78.3132	90.2978	78.694	64.1702	53.4305	52.2249	57.7994	106.885	95.2555	45.4093	43.6792
Solyc01g007210.2.1	0	0	0	0	0	0	0	0	0	0	0	0
Solyc01g007220.2.1	0	0.0343178	0	0.0373488	0.318199	0.328601	0	0	0.110305	0.318774	0.0856779	0.25121
Solyc01g007230.2.1	11.5878	8.68241	8.73347	7.05893	10.7127	8.60934	9.43824	9.31197	10.0377	9.21547	10.7097	10.1112
Solyc01g007240.2.1	0.18842	0.0343178	0.467864	0.149395	0.106066	0.262881	0.171604	0.14828	0	0.0289795	0.0856779	0.157007
Solyc01g007250.2.1	14.0373	15.0655	12.0085	11.4661	8.90958	14.3927	14.9868	14.0866	15.4427	15.3881	17.4783	16.0461
Solyc01g007260.2.1	2.73209	2.29929	3.27505	2.57707	1.06066	0.788642	1.65884	0.800711	0	0.318774	0.514068	0.973441
Solyc01g007270.1.1	4.89892	5.52517	4.8346	5.67702	9.75811	8.21502	15.7876	15.3914	4.19158	5.10039	10.7097	10.6764
Solyc01g007280.2.1	0.847891	0.652038	1.09168	0.896372	1.37886	1.3144	1.25843	0.94899	0.330914	1.15918	0.856779	0.376816
Solyc01g007290.1.1	0.47105	0.137271	0.467864	0.0746977	0.530332	0.197161	0.286007	0.177936	0	0.260815	0.0856779	0.25121
Solyc01g007300.1.1	0.37684	0.686356	0.31191	0.373488	0.318199	0.262881	0.114403	0.0889678	0.330914	0.666528	0.0856779	0.157007
Solyc01g007310.2.1	0	0.102953	0.31191	0	0.106066	0.13144	0.114403	0	0	0.289795	0.171356	0.0942039
Solyc01g007320.2.1	508.075	400.832	521.513	321.387	418.432	318.48	391.544	405.367	322.311	384.963	313.667	308.958
Solyc01g007330.2.1	12.9068	12.8005	12.0085	13.4829	11.137	9.46371	8.69462	6.79121	7.61103	9.30241	7.45398	5.14982
Solyc01g007340.2.1	1.03631	0.446132	0.467864	0.0373488	0.424266	0.657202	0.114403	0.207592	0.330914	0.405713	0.0856779	0.0314013
Solyc01g007350.2.1	0.0942101	0.102953	0.155955	0.112047	0	0.197161	0	0.0593119	0	0.144897	0.0856779	0.0628026
Solyc01g007360.2.1	0.0942101	0.102953	0	0.0746977	0	0.13144	0.171604	0.0889678	0	0.0579589	0	0
Solyc01g007370.2.1	0.0942101	0.102953	0.31191	0.186744	0	0.525761	0	0.326215	0.330914	0.202856	0.171356	0.0942039
Solyc01g007380.1.1	1.03631	0.686356	0.31191	0.0746977	0.424266	0.262881	0.514813	0.415183	0.22061	0.231836	0.171356	0.0942039
Solyc01g007390.1.1	0	0	0	0	0	0.0657202	0.114403	0	0.110305	0.115918	0	0
Solyc01g007400.1.1	2.07262	0.652038	0.935729	0.224093	0.530332	0.460041	0.858021	1.12693	0.22061	0.579589	0.514068	0.314013
Solyc01g007410.2.1	3.57998	3.12292	4.05482	3.02526	3.50019	2.62881	2.68847	3.41043	3.08853	2.08652	2.22763	1.75847
Solyc01g007420.2.1	0	0	0	0.149395	0.212133	0	0	0.0593119	0.110305	0.0289795	0.0856779	0.0314013
Solyc01g007430.2.1	0	0	0	0	0.106066	0	0.0572014	0	0	0.0289795	0	0
Solyc01g007440.1.1	0	0.0343178	0.155955	0	0	0	0	0.0296559	0	0	0.0856779	0
Solyc01g007450.1.1	0	0	0	0	0	0	0	0.0296559	0	0	0	0.0314013
Solyc01g007460.2.1	0.37684	0.411814	0.467864	0.149395	0.106066	0.197161	0.343209	0.889678	0.551524	0.608569	0.171356	0.314013
Solyc01g007470.1.1	1.31894	0.686356	1.24764	0.63493	1.80313	0.985803	0.80082	1.33452	0.661829	1.41999	1.02814	1.03624
Solyc01g007480.1.1	1.13052	0.274542	1.09168	0.224093	0.636398	0.328601	0.40041	0.771055	0.330914	1.15918	0.942457	0.439618
Solyc01g007490.2.1	66.1355	46.8095	100.591	47.7692	86.8684	49.2901	64.2372	78.3214	67.0653	94.0384	67.3429	63.2422
Solyc01g007500.2.1	5.18155	4.87313	4.36673	4.29512	4.03052	4.79757	4.69052	4.83392	3.52975	4.83957	3.85551	3.32854
Solyc01g007510.1.1	0	0	0	0	0	0	0	0	0	0	0	0
Solyc01g007520.2.1	0	0.240225	0	0.0373488	0.212133	0.0657202	0.114403	0.177936	0.110305	0.144897	0	0
Solyc01g007530.2.1	1.22473	0.720674	0.623819	0.672279	0.636398	0.197161	0.686417	0.682087	0	0.52163	0.342712	0.376816
Solyc01g007540.2.1	0.37684	0.137271	0.155955	0.261442	0	0.197161	0.171604	0.177936	0	0.144897	0	0.0628026
Solyc01g007550.1.1	0	0	0	0	0	0	0	0	0	0	0	0
Solyc01g007560.2.1	0	0	0	0.0373488	0.212133	0.0657202	0.171604	0.118624	0	0.0579589	0	0.0628026
Solyc01g007570.2.1	0.0942101	0.0343178	0.467864	0.0746977	0.212133	0.13144	0.0572014	0.0889678	0	0.260815	0.514068	0.157007
Solyc01g007580.2.1	0	0	0	0	0	0	0	0	0	0	0	0
Solyc01g007590.2.1	0	0	0	0	0	0	0	0	0	0	0	0
Solyc01g007600.2.1	2.63788	2.84838	2.02741	2.39033	1.80313	2.69453	1.94485	2.4911	1.21335	3.01386	1.11381	2.04109
Solyc01g007610.2.1	4.23945	5.49085	6.23819	3.80958	4.45479	3.48317	5.20533	5.04151	4.08128	5.85385	3.5128	2.88892
Solyc01g007620.2.1	0	0	0	0	0	0	0	0	0	0	0	0
Solyc01g007630.2.1	27.8862	15.1342	40.0804	17.1431	32.4563	18.2045	20.0777	14.828	15.4427	31.066	16.6215	9.73441
Solyc01g007640.2.1	2.63788	0.960899	0.467864	0.448186	0.530332	0.722922	0.686417	0.622775	0.110305	1.50693	0.685424	0.282612
Solyc01g007650.2.1	0	0	0	0	0.106066	0	0.0572014	0	0	0.0579589	0	0
Solyc01g007660.2.1	0.37684	0.377496	0.31191	0.298791	0.106066	0.197161	0.572014	0.237248	0	0.231836	0.0856779	0.125605
Solyc01g007670.2.1	3.95682	1.33839	1.24764	0.746977	1.591	1.05152	0.457611	1.27521	0.22061	1.50693	1.11381	0.753631
Solyc01g007680.1.1	0	0	0	0.0746977	0	0	0	0	0	0	0.171356	0
Solyc01g007690.2.1	1.69578	0.617721	1.09168	0.597581	1.37886	0.591482	0.629216	0.533807	0	1.18816	0.771102	0.125605
Solyc01g007700.2.1	2.54367	1.61294	3.1191	3.17465	2.43953	2.82597	0.80082	1.57177	1.32366	1.39101	0.942457	0.753631
Solyc01g007710.2.1	29.7704	7.54992	16.6872	7.02158	7.95498	9.66087	7.60779	3.29181	1.21335	14.171	14.5653	2.00968
Solyc01g007720.2.1	5.74681	3.0886	5.14651	2.20358	2.65166	3.15457	2.28806	1.33452	1.87518	2.89795	3.42712	1.16185
Solyc01g007730.2.1	59.5408	76.7346	49.9055	78.2458	34.0473	79.1928	58.7459	44.395	48.7547	55.8434	50.4643	29.7056
Solyc01g007740.2.1	29.582	28.7583	25.2647	22.7081	18.9859	21.2276	21.3933	20.255	26.1422	22.1403	21.8479	20.2224
Solyc01g007750.2.1	12.8126	14.036	19.6503	12.96	14.8493	13.5384	15.044	14.4424	12.5747	12.8959	11.9949	11.4301
Solyc01g007760.2.1	42.8656	45.0593	43.8233	40.5608	45.6086	47.8443	46.562	46.1743	46.1074	40.1366	47.0372	39.8797
Solyc01g007770.2.1	2.92051	1.9218	2.18337	2.76381	3.07593	2.43165	2.23086	2.31316	3.41945	2.78203	3.68415	2.4807
Solyc01g007780.2.1	1.69578	1.26976	0.935729	1.15781	2.12133	1.38012	2.00205	1.36417	0.882438	1.68081	1.45653	1.60147
Solyc01g007790.2.1	13.5662	12.2858	12.0085	10.8685	11.137	11.5668	13.8427	16.1921	15.2221	13.3595	13.023	12.2465
Solyc01g007800.2.1	14.2257	14.3448	16.9991	11.7275	17.9252	15.5757	14.8724	22.6868	16.1045	18.0542	13.6228	15.6065
Solyc01g007810.1.1	5.36997	6.00562	4.67864	4.78065	4.66692	6.30914	5.20533	6.31672	5.51524	5.88283	3.42712	4.55319
Solyc01g007820.1.1	0.847891	1.06385	0.467864	0.410837	0.636398	0.854362	0.686417	1.39383	0.772133	0.840405	0.856779	1.13045
Solyc01g007830.1.1	0.18842	0.446132	0.31191	0.112047	0.106066	0.460041	0.457611	0.266904	0.22061	0.608569	0.42839	0.565224
Solyc01g007840.2.1	25.2483	25.6697	29.9433	29.9538	29.3804	25.8938	22.6518	26.2455	24.598	22.517	17.9924	21.2901
Solyc01g007850.2.1	22.7988	21.9291	20.586	21.9238	16.5464	20.1761	19.7345	20.8185	18.4209	21.4158	22.7903	20.9133
Solyc01g007860.2.1	224.974	233.601	260.289	242.207	246.074	224.697	222.971	222.064	236.052	217.346	236.642	223.546
Solyc01g007870.2.1	40.8872	39.2253	39.6125	37.2741	37.8657	37.2633	35.2933	32.6809	26.3628	27.5015	48.2367	37.8386
Solyc01g007880.2.1	20.0667	22.7527	23.8611	23.6418	21.1072	22.082	25.2258	25.4448	22.2816	23.7632	20.0486	21.7297
Solyc01g007890.1.1	1.03631	0.583403	0.779774	0.485535	0.954598	1.3144	2.17365	2.0166	2.64731	4.75263	1.62788	1.25605
Solyc01g007900.2.1	28.8283	32.1215	26.2004	29.6923	26.8348	26.9453	24.2534	23.1613	30.5544	27.1827	31.3581	24.7756
Solyc01g007910.2.1	84.5064	78.8623	68.7761	68.1243	86.3381	87.0792	85.0013	87.0995	78.9782	77.8389	88.4196	90.8754
Solyc01g007920.2.1	2.8263	3.05429	4.8346	4.40716	3.81839	3.94321	3.26048	3.4994	3.52975	3.59345	3.5128	3.83096
Solyc01g007930.2.1	17.8999	20.9339	23.7051	26.555	24.6074	21.2933	21.6793	22.6868	23.7155	23.1256	22.0192	19.563
Solyc01g007940.2.1	0	0.0686356	0	0.0373488	0	0	0	0	0	0	0	0
Solyc01g007950.2.1	11.3052	11.2219	12.1645	14.0432	13.6826	14.1956	16.5312	17.1115	12.3541	11.36	15.3364	12.8117
Solyc01g007960.2.1	0	0	0	0.112047	0	0	0	0	0.110305	0	0	0
Solyc01g007970.1.1	0	0.0343178	0	0	0	0	0	0	0	0	0	0
Solyc01g007980.2.1	0.847891	1.44135	0.31191	1.12047	1.06066	1.44584	0.972424	1.42349	1.76488	1.59387	1.37085	1.31886
Solyc01g007990.2.1	14.1315	14.9626	17.311	14.9769	11.8794	15.1814	16.9888	13.1376	12.3541	11.1571	13.7941	12.2465
Solyc01g008000.2.1	375.992	361.504	469.268	466.338	471.147	420.281	363.115	346.293	328.377	362.475	297.045	314.704
Solyc01g008010.2.1	15.6389	15.3057	16.8431	14.1552	12.0916	13.5384	13.9571	13.1376	10.6996	11.302	13.4514	11.2103
Solyc01g008020.2.1	43.4308	41.0784	43.1995	46.1258	38.396	39.5635	42.6723	41.1921	46.6589	43.0345	43.0103	45.9715
Solyc01g008030.2.1	0	0	0	0	0	0	0	0	0	0	0	0
Solyc01g008040.1.1	0	0.137271	0	0	0	0	0	0	0	0.0289795	0	0.0314013
Solyc01g008050.2.1	0	0	0	0	0	0	0	0	0	0	0	0
Solyc01g008060.2.1	88.2748	88.6086	93.8848	90.5336	86.5502	84.5819	94.0391	102.491	99.6052	110.47	107.269	105.76
Solyc01g008070.2.1	11.5878	11.2906	12.6323	13.595	11.243	10.9096	10.5823	11.0913	12.0232	9.15751	10.1957	9.89141
Solyc01g008080.2.1	393.139	343.418	498.12	383.834	433.812	351.669	376.328	352.224	453.794	362.33	382.895	374.335
Solyc01g008090.2.1	93.268	80.441	78.9131	77.2	90.5807	92.534	83.7429	82.5029	91.7736	81.6641	82.5935	104.598
Solyc01g008100.2.1	17.4289	14.6537	14.1919	15.4998	14.7432	14.8528	16.7028	16.9632	22.6125	22.575	22.619	21.2273
Solyc01g008110.2.1	346.881	329.623	297.718	312.348	320.108	343.519	425.693	435.409	625.759	692.406	526.063	576.151
Solyc01g008120.2.1	162.701	177.938	171.394	188.275	170.767	193.152	174.865	189.442	182.885	185.034	194.146	202.601
Solyc01g008130.2.1	4.23945	5.21631	4.36673	4.25777	3.92446	3.41745	5.31973	5.21945	5.29463	5.39018	4.11254	4.52179
Solyc01g008140.2.1	34.4809	37.5094	34.9339	37.9838	32.3503	34.4374	36.8949	36.2099	32.0987	30.1386	32.3863	33.1912
Solyc01g008150.1.1	0.18842	0.205907	0.779774	0.33614	0.636398	0.262881	0.457611	0.118624	0.22061	0.231836	0.342712	0.314013
Solyc01g008160.2.1	21.9509	23.5763	21.2099	20.6913	20.1526	20.7676	23.281	21.7971	18.09	22.8938	21.5908	21.5413
Solyc01g008170.2.1	94.7753	102.164	94.3527	107.004	84.1107	97.9888	90.4355	92.9121	82.6183	85.9821	89.5335	94.5179
Solyc01g008180.2.1	106.457	108.822	109.324	112.457	112.749	99.3032	84.6581	84.7864	87.4717	93.0241	91.504	83.6845
Solyc01g008190.2.1	11.5878	9.95217	12.9442	11.3914	11.8794	12.8812	11.0971	10.8244	12.2438	9.5922	9.93864	11.1789
Solyc01g008200.2.1	8.47891	5.9713	9.35729	6.87219	6.04579	8.1493	6.12055	7.44364	5.07402	5.41916	5.39771	5.43243
Solyc01g008210.2.1	7.06575	8.64809	12.0085	10.2709	15.5918	10.1209	9.09503	7.2064	10.2583	9.36037	14.0512	10.645
Solyc01g008220.2.1	1.31894	1.81884	1.24764	1.38191	1.9092	1.3144	2.57406	2.25385	1.98549	2.14448	1.88491	1.38166
Solyc01g008230.2.1	98.1669	99.3844	110.572	108.797	96.2022	88.7222	88.605	84.1636	75.4485	65.2907	80.88	72.3172
Solyc01g008240.2.1	0	0	0	0	0	0	0	0	0	0	0	0
Solyc01g008250.2.1	12.4357	14.4478	14.3478	15.6492	11.5612	11.8954	13.4423	11.7141	11.4717	10.3747	10.1957	9.70301
Solyc01g008260.2.1	10.9284	14.3792	9.98111	10.0842	10.0763	9.98947	14.7008	11.0617	12.7954	10.9253	11.5665	9.89141
Solyc01g008270.2.1	51.6271	54.428	42.7316	47.321	43.3812	49.4216	51.7673	49.1399	48.7547	47.6712	52.7776	45.8459
Solyc01g008280.2.1	39.8509	38.23	31.3469	34.6224	42.0023	39.1035	38.611	41.7556	34.8563	35.9056	42.1535	45.8145
Solyc01g008290.2.1	30.3356	30.234	28.6957	27.0779	26.7287	33.7802	30.8316	31.0794	27.5762	26.5452	31.8722	30.4907
Solyc01g008300.1.1	0.0942101	0.0686356	0	0.0373488	0.106066	0	0	0.118624	0	0.347754	0.0856779	0.0628026
Solyc01g008310.2.1	127.749	135.109	102.774	115.072	115.082	126.971	145.406	146.174	141.852	144.173	144.796	145.796
Solyc01g008320.2.1	32.0314	36.1367	28.0719	36.2284	30.9714	32.5972	30.8888	34.9051	28.238	28.9215	33.3287	36.8651
Solyc01g008330.2.1	113.146	98.4578	65.0332	78.4699	72.3373	92.1397	73.6182	77.5503	75.1175	75.0568	77.3672	90.844
Solyc01g008340.2.1	22.422	24.5372	20.2741	21.7744	19.4102	24.3822	27.9143	26.6014	20.8476	18.1122	25.7034	25.2467
Solyc01g008350.2.1	2.73209	3.77496	5.45842	3.88428	4.77299	4.92901	3.77529	2.93594	2.53701	2.81101	3.76983	2.70051
Solyc01g008360.2.1	0.65947	0.446132	0.467864	0.448186	0.848531	0.722922	0.286007	0.296559	0.441219	0.260815	0.599746	0.0942039
Solyc01g008370.2.1	274.151	322.69	283.37	311.153	249.892	276.485	312.949	303.469	301.463	321.093	314.866	298.438
Solyc01g008380.1.1	1.50736	1.99043	1.7155	2.05419	1.16673	1.97161	2.28806	2.2242	1.43396	1.82571	1.71356	1.85268
Solyc01g008390.1.1	0	0	0	0	0	0.0657202	0	0	0	0.0579589	0	0
Solyc01g008400.2.1	1.31894	1.47567	0.31191	1.23251	0.848531	1.11724	1.48724	1.45314	0.772133	1.1302	1.02814	0.973441
Solyc01g008410.1.1	0	0.102953	0	0.0373488	0	0.0657202	0.114403	0	0.110305	0	0	0
Solyc01g008420.2.1	0	0.0686356	0.155955	0.149395	0.318199	0.0657202	0.286007	0.237248	0.330914	0.231836	0.257034	0.125605
Solyc01g008430.1.1	0	0	0	0	0	0	0	0	0	0	0	0
Solyc01g008440.2.1	19.0304	20.0759	17.9348	20.3551	18.1374	17.613	17.1032	17.1411	10.6996	9.65016	12.0806	11.3673
Solyc01g008450.1.1	0	0.0686356	0	0.0373488	0	0	0.0572014	0	0	0	0.0856779	0
Solyc01g008460.2.1	8.10206	9.4374	7.64179	11.1673	10.3945	10.8438	12.9275	12.07	12.685	10.4326	12.509	10.2682
Solyc01g008470.2.1	21.0088	22.4782	21.9896	19.6455	18.7738	21.2276	21.4505	21.0557	21.1785	20.9232	24.5039	23.2684
Solyc01g008480.2.1	7.81943	10.9131	14.9717	10.5697	9.12171	10.9096	8.80902	11.6548	11.9129	12.4612	10.5384	11.4929
Solyc01g008490.2.1	9.23259	11.2906	11.8526	12.4745	10.1824	11.6325	13.2135	12.1293	8.49347	11.0122	9.08186	9.73441
Solyc01g008500.2.1	0.28263	0.617721	0.31191	0.560233	0.742465	0.920083	0.686417	0.118624	0.110305	0.492651	0.257034	0.596625
Solyc01g008510.2.1	0	0	0	0	0	0	0	0	0	0	0	0
Solyc01g008520.2.1	4.89892	7.00083	7.64179	7.65651	4.77299	5.45478	7.8938	6.9988	9.92743	9.36037	6.5972	6.21746
Solyc01g008530.2.1	30.2414	31.9499	26.5123	27.5634	22.9103	27.3396	29.8591	25.6227	30.5544	27.9362	28.5308	29.5172
Solyc01g008540.2.1	0	0	0	0	0	0	0.0572014	0	0	0.0289795	0	0.157007
Solyc01g008550.2.1	204.247	196.504	162.817	199.181	172.252	199.526	176.752	179.863	122.218	141.999	126.375	144.352
Solyc01g008560.2.1	17.8057	19.7671	23.3932	19.8322	18.7738	21.3591	18.5333	16.6073	14.119	18.7787	17.3926	16.9253
Solyc01g008570.1.1	0	0	0	0	0	0	0	0	0	0	0	0
Solyc01g008580.1.1	0	0	0	0	0	0	0	0	0	0	0	0
Solyc01g008590.1.1	0	0	0	0	0	0	0	0	0	0	0	0
Solyc01g008600.2.1	306.371	329.279	315.497	327.997	272.803	306.979	283.09	299.406	251.605	251.455	325.662	341.803
Solyc01g008610.2.1	0	0	0	0	0	0	0	0	0	0	0	0
Solyc01g008620.2.1	0	0	0	0	0	0	0	0	0	0	0	0
Solyc01g008640.2.1	0	0	0	0	0	0	0	0	0	0	0	0
Solyc01g008650.2.1	0	0	0	0	0	0	0	0	0	0	0.0856779	0
Solyc01g008660.2.1	21.8567	25.2579	28.8516	28.2357	24.7135	29.3769	31.804	33.0071	30.8853	30.3125	29.3875	27.7588
Solyc01g008670.2.1	0.0942101	0.171589	0	0.112047	0.212133	0.13144	0.286007	0.14828	0.882438	0.869384	0.599746	0.439618
Solyc01g008680.2.1	0.18842	0.274542	0.155955	0.298791	0.106066	0.525761	0.171604	0.237248	0.330914	0.637548	0.342712	0.408217
Solyc01g008690.2.1	0	0	0	0	0	0	0	0	0	0	0	0
Solyc01g008700.2.1	16.2983	21.0368	20.8979	20.4298	13.5765	16.6929	20.6497	20.3736	19.8549	18.344	18.078	18.1814
Solyc01g008710.2.1	0	0	0	0	0	0	0	0	0	0	0	0
Solyc01g008720.1.1	0	0	0	0	0	0	0	0	0	0	0	0
Solyc01g008730.2.1	18.6536	18.8405	19.1824	23.3057	22.5921	19.5846	20.5353	19.5729	24.7083	20.5464	22.1049	19.5002
Solyc01g008740.1.1	0	0	0	0	0	0	0	0	0	0	0	0
Solyc01g008750.1.1	0	0	0	0	0	0	0	0	0	0	0	0
Solyc01g008760.2.1	7.44259	6.5547	7.64179	7.69386	5.51545	7.09778	7.43619	7.17674	6.9492	6.83915	7.96805	6.43727
Solyc01g008770.2.1	140.373	146.674	142.543	154.027	137.144	144.519	126.472	145.166	121.115	130.118	125.433	126.83
Solyc01g008780.2.1	42.0177	41.25	48.0341	53.5582	38.5021	37.6577	37.9817	40.8362	30.3338	33.0076	32.9003	27.9472
Solyc01g008790.2.1	6.78312	7.03515	9.35729	7.24567	7.63678	5.98054	6.86417	6.19809	7.16981	6.46242	6.85424	9.92281
Solyc01g008800.1.1	2.73209	3.05429	1.24764	2.16623	1.48493	1.51156	0.743619	0.919334	0.551524	1.04326	1.62788	1.28745
Solyc01g008810.2.1	79.2307	87.3045	96.536	95.8745	93.3384	83.7275	89.6918	77.7282	102.363	101.834	96.4734	88.5831
Solyc01g008820.2.1	59.1639	58.4776	50.8413	49.786	44.4418	49.3559	53.6549	50.1779	54.2699	49.5259	53.0346	52.0948
Solyc01g008830.1.1	0	0	0	0	0	0	0	0	0	0	0	0
Solyc01g008840.2.1	46.2571	46.8095	41.328	43.1006	42.5326	40.0236	45.6467	45.0177	34.8563	41.9043	44.5525	42.643
Solyc01g008850.2.1	6.87733	7.17242	3.1191	3.99633	1.48493	3.15457	1.77324	2.40213	0.661829	1.2751	1.11381	2.04109
Solyc01g008860.1.1	0	0	0	0	0	0	0	0	0	0	0	0.0314013
Solyc01g008870.1.1	0	0	0	0	0	0	0	0	0	0	0	0
Solyc01g008880.1.1	0	0	0	0	0	0	0	0	0	0	0	0
Solyc01g008890.2.1	29.3935	32.7392	33.6862	30.9248	33.0927	27.7339	31.8612	34.4602	31.2163	29.3852	29.0448	27.2249
Solyc01g008900.2.1	13.6605	14.8253	18.2467	13.9685	15.91	13.6698	14.5292	16.2218	14.0087	14.2869	16.1931	14.2562
Solyc01g008910.2.1	21.5741	23.6793	27.448	25.696	29.5925	26.6167	30.088	29.1518	42.6879	43.9039	41.3824	35.8917
Solyc01g008920.2.1	4.23945	4.35836	3.27505	3.84693	2.12133	2.03733	3.31768	2.90628	2.86792	3.3906	2.57034	1.91548
Solyc01g008930.2.1	45.4092	44.8877	50.6853	38.6934	35.108	34.8317	36.3229	36.981	31.6575	29.1244	30.9297	26.5969
Solyc01g008940.2.1	0.0942101	0.0343178	0	0	0	0	0.0572014	0.0296559	0	0.0289795	0	0
Solyc01g008950.2.1	293.087	297.398	324.23	312.236	271.848	290.615	301.108	295.907	282.27	311.79	281.281	289.143
Solyc01g008960.2.1	2059.24	2112.91	1956.3	2462.56	2155.27	2142.08	2049.13	2162.78	1944.01	1954.32	2115.39	2306.39
Solyc01g008970.2.1	986.285	1017.35	1162.64	1102.28	1226.34	1088.26	1068.18	964.115	1231.66	1092.27	1226.74	1101.31
Solyc01g008980.2.1	6.5947	7.5156	7.9537	10.3083	10.8188	9.52943	10.9255	8.09607	8.38316	7.04201	9.25322	7.53631
Solyc01g008990.2.1	22.1394	23.0959	19.9622	22.5587	18.8798	22.4763	27.1135	24.1399	22.6125	22.0824	27.5026	20.7563
Solyc01g009000.2.1	34.5751	33.2196	44.6031	41.6066	45.1843	34.766	40.4414	39.7686	40.5922	46.9757	40.6113	44.0246
Solyc01g009010.2.1	22.5162	21.7575	22.3015	23.4177	21.6375	20.5047	22.3086	22.7758	22.2816	24.7774	21.8479	23.865
Solyc01g009020.2.1	16.0157	17.0903	19.3384	13.6323	16.5464	12.3554	15.2728	11.8624	14.6705	14.4897	18.4208	17.2707
Solyc01g009030.2.1	51.3445	46.6379	49.5936	44.6319	50.3815	54.8764	55.4854	58.2146	52.7257	48.1639	54.9196	52.2832
Solyc01g009040.2.1	186.536	200.176	161.101	175.54	175.646	198.804	198.546	216.37	190.055	216.332	196.631	200.717
Solyc01g009050.2.1	60.7655	57.0362	54.8961	66.2195	61.0942	60.3968	54.2842	59.7271	63.7562	68.1597	65.715	71.909
Solyc01g009060.2.1	63.3092	64.5861	78.9131	66.0327	62.6852	63.6171	66.5825	76.5123	57.1379	64.5663	64.3441	63.148
Solyc01g009070.2.1	16.2041	17.4334	21.2099	15.6492	20.1526	16.2986	15.9592	17.0522	23.0537	22.3432	23.8185	21.8867
Solyc01g009080.2.1	9.13838	7.20674	11.6966	9.82274	8.16711	5.98054	4.57611	4.2408	5.62554	4.92651	4.79796	4.773
Solyc01g009090.2.1	304.204	290.123	311.442	323.553	340.049	325.118	307.229	312.544	314.479	277.681	299.444	322.743
Solyc01g009100.2.1	196.428	181.335	183.871	144.577	182.116	187.565	169.717	168.386	184.65	146.086	198.087	164.543
Solyc01g009110.2.1	4.33366	5.90266	5.14651	4.78065	4.87905	5.38905	4.69052	5.07117	6.50798	5.24528	5.22635	5.52663
Solyc01g009120.2.1	1.31894	1.5443	0.623819	1.86744	0.742465	1.70872	1.48724	1.66073	2.09579	1.85469	1.97059	1.63287
Solyc01g009130.1.1	0	0	0	0	0	0	0	0	0	0	0	0
Solyc01g009140.1.1	0	0	0	0	0	0	0	0	0	0	0	0
Solyc01g009150.2.1	13.6605	14.2419	17.155	15.3504	14.9554	14.7213	17.2748	14.7094	11.1408	13.0697	13.7085	12.5291
Solyc01g009160.2.1	1.31894	1.33839	1.24764	0.821674	1.2728	1.18296	1.65884	1.4828	1.21335	0.898364	1.79924	1.69567
Solyc01g009170.2.1	101.464	95.3006	96.8479	112.943	96.2022	93.8484	85.8593	92.3783	85.9274	99.5155	73.426	87.8609
Solyc01g009180.2.1	59.4465	54.1878	49.9055	50.1221	56.5334	54.2192	51.1381	59.4305	62.3222	67.3483	73.426	76.7448
Solyc01g009190.1.1	0.0942101	0.102953	0	0.112047	0.106066	0	0	0	0	0	0	0.0628026
Solyc01g009200.2.1	0	0.102953	0	0	0	0	0	0	0	0	0	0
Solyc01g009210.1.1	0	0	0	0	0	0	0	0	0	0	0	0
Solyc01g009220.2.1	0	0	0	0	0	0.0657202	0	0	0	0	0	0
Solyc01g009230.2.1	26.9441	26.9395	18.0908	21.6623	19.092	23.0678	17.2748	19.6619	28.7895	27.4146	23.8185	28.7322
Solyc01g009240.2.1	1.50736	2.36793	2.96314	1.15781	0.106066	1.05152	0.457611	0.266904	1.10305	0.811425	0.942457	0.565224
Solyc01g009250.2.1	0.47105	0.30886	1.09168	0.298791	0.530332	0.197161	0.343209	0.118624	0.330914	0.289795	0.342712	0.439618
Solyc01g009260.1.1	0	0	0	0	0	0	0	0	0	0	0	0
Solyc01g009270.1.1	0	0	0	0	0	0	0	0	0	0	0	0
Solyc01g009280.2.1	69.8097	70.3858	80.6286	85.0433	91.6414	89.9709	78.7092	79.7745	77.6546	68.8552	82.9363	82.9623
Solyc01g009290.2.1	57.6566	54.0162	53.6485	53.1847	51.2301	59.2796	55.7714	63.4637	56.3657	57.4083	53.8058	54.6383
Solyc01g009300.2.1	41.264	46.0888	39.6125	41.6066	37.2293	33.7802	47.3056	45.1067	28.6792	35.326	51.0641	42.957
Solyc01g009310.2.1	90.159	91.2511	71.8952	80.1506	77.7467	85.3705	67.1545	76.3641	73.1321	70.1593	75.1396	82.1772
Solyc01g009320.1.1	0	0	0	0	0	0	0	0	0	0	0	0
Solyc01g009330.1.1	0.0942101	0	0	0.0373488	0	0.13144	0	0.0889678	0	0.0289795	0	0
Solyc01g009340.2.1	20.0667	19.7327	20.4301	15.5745	9.86418	10.2523	7.60779	8.27401	7.50072	9.27343	8.82483	8.63536
Solyc01g009350.2.1	0	0.0343178	0	0	0	0.0657202	0	0	0	0.0289795	0	0
Solyc01g009360.1.1	0	0	0	0	0	0	0	0	0	0	0	0
Solyc01g009370.1.1	0	0	0	0.0373488	0	0	0	0	0	0	0	0.0942039
Solyc01g009380.2.1	16.0157	17.3305	16.5312	15.2383	18.6677	17.6787	17.7896	20.7295	17.9797	17.5326	13.3658	15.3238
Solyc01g009390.2.1	21.1031	19.9386	21.3658	20.4298	18.6677	19.5846	19.3913	19.7805	21.73	20.6624	19.7059	19.1234
Solyc01g009400.2.1	0	0	0	0	0	0	0	0	0	0	0	0
Solyc01g009410.2.1	0	0	0	0	0.106066	0	0	0	0.110305	0	0	0
Solyc01g009420.2.1	152.055	129.584	144.726	129.899	146.478	129.863	135.396	131.702	124.093	124.409	123.205	129.468
Solyc01g009430.2.1	4.89892	4.70154	5.77033	4.33246	6.15185	4.46897	2.51686	2.758	3.75036	3.41958	3.5128	4.23918
Solyc01g009440.1.1	0	0.0686356	0	0	0	0	0	0	0	0	0	0
Solyc01g009450.2.1	33.7272	38.7105	38.9887	36.4525	40.8356	39.8264	37.9817	34.1637	38.4964	39.528	38.6408	39.7855
Solyc01g009460.2.1	0	0	0	0	0	0	0	0	0	0	0	0
Solyc01g009470.1.1	0	0	0	0	0.212133	0	0	0	0	0	0	0.0314013
Solyc01g009480.2.1	0	0	0	0	0	0	0	0	0	0	0	0
Solyc01g009490.1.1	0	0	0	0	0	0	0	0	0	0	0	0
Solyc01g009500.2.1	7.15996	6.07425	6.08224	5.07944	4.13659	3.35173	3.20328	3.02491	2.86792	3.33264	3.17008	2.60631
Solyc01g009510.1.1	0	0	0	0	0	0	0	0	0	0	0	0
Solyc01g009520.2.1	175.325	178.212	158.606	142.971	139.689	170.084	185.047	167.942	159.39	167.501	161.503	162.816
Solyc01g009530.1.1	0	0	0	0	0	0	0	0.0593119	0	0	0.171356	0
Solyc01g009540.1.1	0	0	0	0	0	0	0	0	0	0	0	0
Solyc01g009550.1.1	0.18842	0.205907	0.31191	0.149395	0.530332	0.262881	0.286007	0.652431	0	0.434692	0.257034	0.439618
Solyc01g009560.1.1	0	0	0	0	0	0	0	0	0	0	0	0
Solyc01g009570.2.1	2.92051	4.32404	4.67864	2.87586	1.80313	2.23449	2.80287	2.66904	2.53701	2.83999	2.48466	2.16669
Solyc01g009580.1.1	0	0	0	0	0	0	0	0	0	0	0	0
Solyc01g009590.2.1	0	0	0	0	0	0	0	0	0	0	0	0
Solyc01g009600.2.1	0	0	0	0	0	0	0	0	0	0	0	0
Solyc01g009610.2.1	24.1178	21.3114	19.9622	19.7575	20.0466	16.5615	15.2156	16.4887	17.3178	17.9963	16.4502	17.2393
Solyc01g009620.2.1	20.2552	21.5859	18.7146	17.7033	17.1828	18.4017	19.2197	18.6536	14.4499	15.8518	18.3351	18.0558
Solyc01g009630.2.1	41.9235	37.4407	39.1447	31.1489	31.3957	33.6487	36.2657	36.5954	33.0914	34.7174	37.4413	31.4641
Solyc01g009640.1.1	0	0	0	0	0	0	0	0	0	0	0	0
Solyc01g009650.1.1	0	0	0	0	0	0	0	0	0	0	0	0
Solyc01g009660.1.1	0	0	0	0	0	0	0	0	0	0	0	0
Solyc01g009670.2.1	7.44259	9.30013	6.70606	6.83484	7.21252	6.90062	6.46376	7.02846	7.94194	6.98405	6.25449	6.56287
Solyc01g009680.2.1	0	0	0	0	0	0	0	0	0	0	0	0
Solyc01g009690.1.1	0	0	0	0	0	0	0	0	0	0	0	0
Solyc01g009700.1.1	0	0	0	0	0	0	0	0	0	0	0	0
Solyc01g009710.1.1	0	0	0	0	0	0	0	0	0	0	0	0
Solyc01g009720.1.1	1.41315	1.06385	1.09168	1.56865	1.06066	0.722922	1.94485	1.18624	1.65457	1.9706	1.79924	2.04109
Solyc01g009730.1.1	0	0	0	0	0	0	0	0	0	0	0	0
Solyc01g009740.1.1	0	0	0	0	0	0	0	0	0	0	0	0
Solyc01g009750.2.1	74.4259	78.8966	111.196	110.403	117.734	105.152	93.1239	75.771	91.8839	74.7381	92.8749	78.3149
Solyc01g009760.2.1	5.36997	6.3488	5.92628	5.30353	3.28806	4.33753	2.11645	2.93594	2.64731	2.66611	2.39898	3.35994
Solyc01g009770.2.1	14.2257	15.8891	15.4395	16.4708	14.7432	16.1014	13.0991	11.4769	14.0087	14.113	13.4514	14.4446
Solyc01g009780.2.1	9.70364	9.78058	10.6049	10.2336	9.75811	9.52943	10.1819	9.19334	8.93469	7.96935	10.7097	7.78753
Solyc01g009790.1.1	0	0	0	0	0	0	0	0	0	0	0	0
Solyc01g009800.1.1	0	0	0	0	0	0	0	0	0	0	0	0
Solyc01g009810.2.1	0	0	0	0	0	0	0	0	0	0	0	0
Solyc01g009820.2.1	25.2483	29.5476	26.9802	32.4561	27.6833	26.7481	24.7682	31.3463	26.9144	29.9358	26.8172	28.2926
Solyc01g009830.2.1	0	0	0	0	0	0	0	0	0	0.0289795	0	0
Solyc01g009840.1.1	0	0	0	0	0	0	0	0	0	0	0	0
Solyc01g009850.2.1	65.6644	63.0075	67.2165	56.5088	61.6246	63.2885	64.6376	51.7793	63.4252	56.2492	71.3697	58.8775
Solyc01g009860.2.1	6.68891	4.77018	4.67864	4.22042	5.30332	4.53469	9.38103	10.1127	6.8389	6.52038	5.99746	4.30198
Solyc01g009870.2.1	0	0.0343178	0	0.186744	0.212133	0	0	0	0	0.0579589	0	0.0314013
Solyc01g009880.2.1	0	0	0	0	0	0	0	0	0	0	0	0
Solyc01g009890.1.1	0.75368	0.205907	0	0.298791	0	0.0657202	0.114403	0.0296559	0	0.231836	0	0.0628026
Solyc01g009900.2.1	0.18842	0.720674	0.155955	0.261442	0	0.460041	0.171604	0.266904	0.330914	0.608569	0.342712	0.157007
Solyc01g009910.1.1	0.0942101	0.171589	0.467864	0	0	0.13144	0.114403	0.0593119	0	0.0289795	0	0.0628026
Solyc01g009920.1.1	0	0	0	0	0	0	0	0	0	0	0	0
Solyc01g009930.1.1	0	0	0	0	0	0	0	0	0	0	0	0
Solyc01g009940.1.1	0	0	0	0	0	0	0	0	0	0	0	0
Solyc01g009950.1.1	0	0	0	0	0	0	0	0	0	0	0	0
Solyc01g009960.2.1	0	0	0	0	0	0	0	0	0	0	0	0
Solyc01g009970.2.1	25.2483	26.2874	17.9348	19.7575	13.3644	19.9132	21.5649	23.1316	20.8476	20.8073	21.1625	19.9398
Solyc01g009980.1.1	0	0	0	0	0	0	0	0	0	0	0	0
Solyc01g009990.2.1	168.919	152.405	139.891	122.056	132.265	146.425	143.404	149.199	161.596	175.558	141.968	161.937
Solyc01g010000.2.1	9.70364	10.261	11.0728	9.74805	9.65204	11.4353	15.902	16.0142	11.2511	8.95466	26.0461	20.348
Solyc01g010010.1.1	0	0.137271	0	0	0	0.0657202	0.0572014	0	0	0	0	0.0314013
Solyc01g010020.2.1	4.14524	4.28973	6.70606	5.34088	4.56086	3.48317	2.68847	3.67734	2.97823	2.60815	2.57034	2.98312
Solyc01g010030.2.1	34.4809	38.0585	34.1541	42.6524	33.8352	41.4037	41.3566	39.3831	30.3338	33.5872	34.6996	33.097
Solyc01g010040.2.1	0	0	0	0	0	0	0	0	0	0	0	0
Solyc01g010050.2.1	0	0	0	0	0	0	0	0	0	0	0	0
Solyc01g010060.2.1	0.0942101	0	0	0.0373488	0	0.0657202	0.114403	0.0593119	0	0	0.0856779	0.0942039
Solyc01g010070.1.1	0	0	0	0	0	0	0	0	0	0	0	0
Solyc01g010080.2.1	0.0942101	0	0	0	0	0.0657202	0.171604	0.0593119	0	0.0289795	0.171356	0.0314013
Solyc01g010090.1.1	0	0	0	0	0	0	0	0	0	0	0	0
Solyc01g010100.1.1	0	0	0	0	0	0	0	0	0	0	0	0
Solyc01g010110.1.1	0	0	0	0	0	0	0	0	0	0	0	0
Solyc01g010120.1.1	0	0	0	0	0	0	0	0	0	0	0	0
Solyc01g010130.2.1	14.4141	13.7271	21.8337	17.2178	46.6692	51.3932	124.642	119.187	37.9448	43.9619	108.897	101.332
Solyc01g010140.1.1	0	0	0	0	0	0	0	0	0	0.0289795	0	0
Solyc01g010150.2.1	105.327	107.449	131.782	150.591	197.177	224.106	391.258	363.523	187.518	160.894	456.321	388.905
Solyc01g010160.2.1	0	0	0	0	0	0	0	0	0	0	0	0
Solyc01g010170.1.1	0	0	0	0	0	0	0	0	0	0	0	0
Solyc01g010180.2.1	16.3925	14.5164	8.2656	8.29144	7.74285	7.8207	6.52096	6.82087	2.97823	3.07182	3.17008	4.20778
Solyc01g010190.2.1	1.50736	2.16202	2.80719	1.64335	2.22739	2.16877	1.65884	1.92764	1.54427	1.88367	2.57034	2.19809
Solyc01g010200.2.1	0.28263	0.686356	0.31191	0.149395	0	0.460041	0.80082	0.652431	1.43396	0.724487	0.771102	0.690829
Solyc01g010210.1.1	0	0	0	0	0	0	0	0	0	0	0	0
Solyc01g010220.2.1	3.01472	3.84359	2.18337	2.87586	4.03052	5.12617	6.69257	6.55396	4.08128	3.41958	4.02686	3.07733
Solyc01g010230.2.1	0	0.0343178	0.467864	0.0746977	0.106066	0.13144	0.343209	0.622775	1.21335	0.898364	0.856779	0.879237
Solyc01g010240.2.1	5.36997	5.18199	4.05482	3.95898	3.71232	4.20609	1.54444	2.07592	0.882438	0.492651	0.685424	0.125605
Solyc01g010250.2.1	5.36997	5.25063	6.23819	6.16256	4.77299	5.8491	3.60369	4.35942	10.148	7.85344	2.99873	3.04593
Solyc01g010260.2.1	0	0.0343178	0	0	0	0	0	0	0	0	0	0
Solyc01g010270.2.1	23.4583	19.5268	23.0813	17.4419	19.9405	13.4726	11.6119	11.6844	15.2221	9.99792	15.2507	10.3938
Solyc01g010280.2.1	0	0	0	0.149395	0	0	0.0572014	0	0	0	0	0
Solyc01g010290.2.1	12.7184	13.7271	18.0908	15.3877	16.016	13.9327	13.3279	12.2479	13.5675	12.8089	15.5077	12.7489
Solyc01g010300.1.1	0	0	0	0	0	0	0	0	0	0	0	0
Solyc01g010310.2.1	88.8401	81.4705	81.0965	82.4662	108.082	94.8999	80.8256	90.2727	73.9042	73.5499	84.7355	82.397
Solyc01g010320.1.1	0	0	0	0	0	0	0	0	0	0	0	0
Solyc01g010330.1.1	0	0	0	0	0	0	0	0	0	0	0	0
Solyc01g010340.1.1	0	0	0	0	0	0	0	0	0	0.0289795	0.0856779	0
Solyc01g010350.2.1	0.18842	0.411814	0	0.112047	0	0.197161	0.171604	0.0593119	1.21335	0.724487	0	0.125605
Solyc01g010360.2.1	0	0	0	0	0	0	0	0	0	0	0	0
Solyc01g010370.2.1	26.8499	29.8565	30.5671	25.3972	24.7135	27.5368	23.7386	25.8303	21.3991	23.0677	22.619	19.9084
Solyc01g010380.2.1	0	0	0	0	0	0	0	0	0	0	0	0
Solyc01g010390.2.1	3.7684	3.80928	4.67864	4.14572	2.33346	1.97161	1.25843	2.69869	1.21335	1.47795	1.62788	1.22465
Solyc01g010400.1.1	0	0	0	0	0	0	0	0	0	0	0	0
Solyc01g010410.2.1	1.31894	0.720674	1.09168	0.597581	0.530332	0.525761	0.40041	0.326215	0.661829	0.666528	0.42839	0.533822
Solyc01g010420.2.1	0	0	0	0	0	0	0	0	0	0	0	0
Solyc01g010430.2.1	0.47105	0.892263	1.40359	0.63493	0.636398	1.38012	2.05925	1.45314	1.32366	1.82571	1.71356	1.75847
Solyc01g010440.2.1	162.607	174.712	193.852	215.353	200.89	198.869	227.376	208.244	246.2	242.384	221.477	220.469
Solyc01g010450.1.1	0	0	0	0	0	0	0	0	0	0	0	0
Solyc01g010460.2.1	6.50049	6.89788	4.67864	6.2746	3.92446	6.70346	5.94895	7.4733	6.9492	7.7665	6.76856	5.90345
Solyc01g010470.2.1	7.25417	8.854	8.2656	8.59023	6.57612	7.36066	9.72424	8.9561	9.1553	7.59262	7.62534	7.1595
Solyc01g010480.2.1	0.37684	0	0.155955	0.112047	0.106066	0.0657202	0.0572014	0.14828	0	0.231836	0	0.188408
Solyc01g010490.2.1	0	0	0	0	0	0	0	0	0	0	0	0
Solyc01g010500.1.1	0	0	0	0.0746977	0.106066	0	0	0	0	0	0	0.0314013
Solyc01g010510.2.1	6.31207	7.82446	5.45842	6.23726	4.66692	6.30914	8.23701	8.36298	6.50798	5.70896	5.22635	6.02905
Solyc01g010520.2.1	56.3376	55.6635	58.3271	56.0233	57.2759	55.3364	57.659	60.9133	43.3498	55.5536	64.2585	61.264
Solyc01g010530.1.1	0	0	0	0	0	0	0	0	0	0	0	0
Solyc01g010540.2.1	95.6232	64.2773	73.1428	58.0401	72.5494	75.8411	74.7051	64.4424	46.5486	69.4348	70.9413	60.9499
Solyc01g010550.1.1	0	0	0	0	0	0	0	0	0	0	0	0
Solyc01g010570.2.1	27.8862	31.0576	34.622	27.1526	29.0622	28.9169	31.6324	32.3843	35.2975	31.6746	30.6727	27.2249
Solyc01g010580.2.1	188.985	128.726	158.294	121.72	142.235	121.319	127.159	125.148	106.665	159.996	140.34	126.359
Solyc01g010590.2.1	12.9068	16.5069	12.3204	12.1384	12.5158	11.8954	16.1308	14.2349	16.3251	16.6632	16.0218	16.2973
Solyc01g010600.2.1	0.37684	0.205907	0	0.149395	0.106066	0	0.228806	0.444839	0.661829	0.608569	0.342712	0.439618
Solyc01g010610.1.1	0	0	0	0	0	0	0	0	0	0	0	0
Solyc01g010630.1.1	0.0942101	0	0	0	0	0	0	0	0	0	0	0
Solyc01g010640.2.1	18.0883	19.3552	20.2741	17.9274	19.092	18.7303	18.0184	17.9715	16.656	13.9101	14.8223	13.1571
Solyc01g010650.2.1	47.0108	44.7504	57.5473	64.4267	70.9584	53.1676	54.1698	48.8137	48.5341	41.1798	50.0359	37.8072
Solyc01g010660.2.1	31.3719	30.4399	38.053	35.1079	33.4109	31.8086	30.0307	30.7532	38.2758	37.5864	40.9541	40.0995
Solyc01g010670.1.1	0	0	0	0	0	0	0	0	0	0	0	0
Solyc01g010680.1.1	0.0942101	0	0.155955	0	0	0	0	0	0	0	0	0
Solyc01g010690.1.1	0.0942101	0	0	0	0	0.13144	0.0572014	0	0	0.0289795	0.0856779	0
Solyc01g010700.2.1	4.61629	4.94176	3.74292	4.85535	3.39412	3.15457	2.57406	2.69869	5.29463	4.81059	4.2839	4.30198
Solyc01g010710.2.1	0.847891	2.36793	1.40359	1.04577	0.848531	1.3144	5.43414	4.89323	6.72859	6.66528	8.31076	8.00733
Solyc01g010720.2.1	0	0	0	0	0	0	0	0	0	0	0.0856779	0
Solyc01g010730.1.1	0	0	0	0	0	0	0	0	0	0	0	0
Solyc01g010740.2.1	0	0	0	0.0373488	0	0	0	0	0	0.0289795	0	0
Solyc01g010750.2.1	194.261	184.184	204.457	204.821	225.603	199.658	189.737	180.279	184.319	197.118	218.479	217.014
Solyc01g010760.2.1	242.779	229.586	216.933	230.89	229.422	258.872	242.591	226.69	218.624	226.533	223.105	237.802
Solyc01g010770.2.1	0.56526	0.205907	0.31191	0.63493	0.212133	0.262881	0.171604	0.118624	0	0.318774	0.0856779	0.282612
Solyc01g010780.2.1	57.2797	56.8303	65.8129	63.4183	60.776	60.4626	61.8919	69.039	57.1379	59.6977	66.5718	61.1698
Solyc01g010790.1.1	0	0	0	0	0	0	0	0	0	0	0	0
Solyc01g010800.1.1	0	0	0	0	0	0	0	0	0	0	0	0
Solyc01g010810.2.1	14.0373	13.5899	16.6872	16.5829	22.8043	14.9842	13.9571	14.2052	18.6415	15.4171	16.9642	15.5751
Solyc01g010820.2.1	78.7596	76.2199	65.9689	74.2121	74.9889	73.4094	74.0186	82.2063	65.6313	76.6217	78.3953	80.513
Solyc01g010830.2.1	13.472	12.526	14.0359	10.0095	10.2884	11.041	11.5547	13.2859	18.7518	15.4171	14.7366	14.6958
Solyc01g010840.1.1	0	0	0	0	0	0	0	0	0	0	0	0
Solyc01g010850.1.1	0	0	0	0	0	0	0	0	0	0	0	0
Solyc01g010860.2.1	7.34838	8.854	7.32988	7.73121	9.01564	6.57202	7.60779	7.17674	6.50798	7.30283	7.62534	5.80924
Solyc01g010870.2.1	47.1992	49.8638	57.3914	53.3341	45.9268	49.8816	48.5068	54.7745	53.1669	51.2067	51.1497	57.3388
Solyc01g010880.2.1	17.7115	16.7471	18.2467	17.778	22.0618	17.6787	16.188	16.4294	15.6633	16.7212	16.2788	16.2659
Solyc01g010890.2.1	0	0.0343178	0	0	0	0	0	0	0	0	0	0.0628026
Solyc01g010900.2.1	0	0	0	0	0	0	0	0	0	0	0	0
Solyc01g010910.1.1	0.37684	0.343178	0.31191	0.186744	0.318199	0.591482	0.171604	0.415183	0.110305	0.405713	0.171356	0.0942039
Solyc01g010920.1.1	4.42787	5.93698	6.70606	6.08786	7.84891	6.04626	7.15018	7.02846	6.28737	5.01345	5.14068	5.62083
Solyc01g010930.2.1	5.93523	7.96173	8.42156	6.98423	6.36398	6.63774	6.97857	6.96915	6.8389	7.33181	7.02559	6.84549
Solyc01g010940.2.1	16.9578	16.2666	14.3478	13.0347	13.5765	15.51	14.4148	15.3025	13.8984	14.171	19.2775	15.3238
Solyc01g010950.2.1	16.8636	14.8596	15.2836	16.5829	16.8646	12.8154	14.9296	13.6417	15.6633	13.7363	12.766	12.5605
Solyc01g010960.1.1	20.3494	9.23149	12.0085	8.03	13.4704	10.1209	8.52301	9.66784	3.97097	16.7501	10.2814	9.5774
Solyc01g010970.2.1	29.7704	27.0081	31.5029	31.1863	37.6536	37.8548	50.0512	58.0367	89.2366	92.3576	57.1472	59.2543
Solyc01g010980.1.1	6.12365	7.5156	5.30246	6.2746	7.42465	8.08358	9.09503	8.86713	9.1553	8.25915	11.1381	9.5146
Solyc01g010990.2.1	11.5878	11.3249	11.8526	11.2793	9.33384	10.1866	11.2687	12.3072	10.148	9.41833	8.48212	8.38415
Solyc01g011000.2.1	222.995	215.996	189.797	196.081	194.95	228.575	254.375	229.418	241.347	252.788	258.319	268.042
Solyc01g011010.2.1	0.37684	0.377496	0.467864	0.0746977	0.636398	0.328601	0.629216	0.563463	0.441219	0.231836	0.257034	0.47102
Solyc01g011020.1.1	0	0	0	0	0	0	0	0.0296559	0	0	0	0
Solyc01g011030.2.1	22.5162	23.8852	29.3195	25.0237	26.0923	24.3822	26.2555	24.051	23.8258	23.4154	22.7047	21.1331
Solyc01g011040.2.1	53.2287	55.5262	51.3091	50.5703	43.169	50.4074	54.3986	50.2668	48.5341	48.3378	49.5219	46.3483
Solyc01g011050.2.1	0	0	0	0	0	0	0	0	0	0	0	0
Solyc01g011060.1.1	0	0.0686356	0	0.0373488	0.106066	0.13144	0.0572014	0.0593119	0.110305	0.0289795	0.0856779	0
Solyc01g011070.1.1	0	0	0	0	0	0	0	0	0	0	0	0
Solyc01g011080.2.1	5.6526	4.73586	4.36673	5.67702	4.66692	5.06045	5.89175	4.95254	4.6328	4.17304	5.91178	3.89376
Solyc01g011090.2.1	7.34838	8.30491	6.39415	8.44084	6.78825	7.36066	8.69462	8.36298	4.96371	7.12895	6.68288	7.94453
Solyc01g011100.2.1	47.0108	53.6731	44.915	56.21	44.76	56.9794	51.7101	52.3724	47.9826	52.7426	49.1791	47.887
Solyc01g011110.1.1	0	0	0	0	0	0	0	0	0	0	0	0
Solyc01g011130.1.1	0	0	0	0	0	0	0	0	0	0	0	0
Solyc01g011150.1.1	0	0	0	0	0	0	0	0	0	0	0	0
Solyc01g011170.1.1	0	0	0	0	0	0	0	0	0	0	0	0
Solyc01g011180.1.1	0.0942101	0.102953	0.31191	0.224093	0.318199	0.13144	0.114403	0.0889678	0.110305	0.173877	0.0856779	0.188408
Solyc01g011190.1.1	0	0	0	0	0	0	0	0.0296559	0	0	0	0
Solyc01g011200.2.1	0.28263	0.995217	1.09168	0.933721	1.69706	0.394321	0.572014	0.682087	0.661829	0.579589	0.856779	0.47102
Solyc01g011220.1.1	1.03631	0.892263	1.24764	1.04577	1.06066	1.3144	1.20123	0.860023	0.772133	0.666528	0.942457	0.72223
Solyc01g011230.2.1	0.65947	0.823627	0.467864	0.784326	0.530332	0.525761	0.972424	1.21589	0.110305	0.376733	0.514068	0.659428
Solyc01g011240.1.1	0	0	0	0	0	0	0	0	0	0	0	0
Solyc01g011250.1.1	0	0	0	0	0	0.0657202	0	0	0	0	0.0856779	0
Solyc01g011260.1.1	0	0	0	0	0	0	0	0	0	0	0	0
Solyc01g011270.1.1	0	0	0	0	0	0	0	0	0	0	0	0
Solyc01g011280.1.1	0	0	0	0	0	0	0	0	0	0	0	0
Solyc01g011290.1.1	0	0	0	0	0	0	0	0	0	0	0	0
Solyc01g011300.1.1	0	0	0	0	0	0	0	0	0	0	0	0
Solyc01g011310.1.1	0	0	0	0	0	0	0	0	0	0	0	0
Solyc01g011320.1.1	0	0	0	0	0	0	0	0	0	0	0	0
Solyc01g011330.1.1	0	0	0	0	0	0	0	0	0	0	0	0
Solyc01g011340.2.1	62.7439	68.2581	70.6475	62.6713	63.7459	66.9689	63.5508	69.8101	62.2119	59.8426	59.9746	63.7761
Solyc01g011350.2.1	35.5172	41.2843	38.8327	37.3862	33.7291	40.6151	40.4414	48.962	53.6081	49.6708	38.1267	36.4883
Solyc01g011370.1.1	0	0	0	0	0	0	0	0	0	0	0	0
Solyc01g011390.2.1	0	0	0	0	0	0	0	0	0	0	0	0
Solyc01g011400.1.1	0	0	0	0	0	0	0	0	0	0	0	0
Solyc01g011410.1.1	0.942101	0.480449	0.467864	0.709628	0.212133	0.525761	0.40041	0.978646	0.330914	0.840405	0.599746	0.753631
Solyc01g011420.1.1	0	0	0	0.0373488	0	0	0.0572014	0.237248	0	0.0289795	0	0.0314013
Solyc01g011430.2.1	0.47105	0.30886	0.31191	0.112047	0.106066	0.13144	0.0572014	0.0889678	0	0.0289795	0.0856779	0.125605
Solyc01g011450.1.1	0	0	0	0	0	0	0.0572014	0	0	0	0	0
Solyc01g011460.1.1	0	0	0	0	0	0.0657202	0	0	0.110305	0	0	0
Solyc01g011470.1.1	0	0	0	0	0	0	0	0	0	0	0	0
Solyc01g011480.1.1	0	0	0	0	0	0	0	0	0	0	0	0
Solyc01g011490.1.1	0	0	0	0.0373488	0	0.13144	0.114403	0.0296559	0	0.0579589	0	0
Solyc01g011500.1.1	0	0	0	0	0	0	0	0	0	0	0	0
Solyc01g011510.2.1	0.847891	0.995217	0.155955	0.112047	0.318199	0.657202	0.343209	0.444839	0.441219	0.869384	0.0856779	0.785033
Solyc01g011520.1.1	0	0	0	0	0	0	0	0	0	0	0	0
Solyc01g011530.1.1	0	0	0	0	0	0	0	0	0	0	0	0
Solyc01g011540.1.1	0	0	0	0	0	0	0	0	0	0	0	0
Solyc01g012540.1.1	0	0	0	0	0	0	0	0	0	0	0	0
Solyc01g012550.1.1	0	0	0	0	0	0	0	0	0	0	0	0
Solyc01g012560.1.1	0	0	0	0	0	0	0	0	0	0	0	0
Solyc01g012570.1.1	0	0	0	0	0	0	0	0	0	0	0	0
Solyc01g012580.1.1	0.0942101	0.0343178	0	0.112047	0	0.13144	0.114403	0.0889678	0.441219	0.347754	0.0856779	0.314013
Solyc01g012590.1.1	0	0	0	0	0	0	0	0	0	0	0	0
Solyc01g012600.1.1	0	0	0	0	0	0	0	0	0	0	0	0
Solyc01g012610.1.1	0	0	0	0	0	0	0	0	0	0	0	0
Solyc01g012620.1.1	0	0	0	0	0	0	0	0	0	0	0	0
Solyc01g012630.1.1	0	0	0	0	0	0	0	0	0	0	0	0
Solyc01g012640.1.1	0	0	0	0	0	0	0	0	0	0	0	0
Solyc01g012650.1.1	0	0	0	0	0	0	0	0	0	0	0	0
Solyc01g012660.1.1	0	0	0	0	0	0	0	0	0	0	0	0
Solyc01g012670.1.1	0	0	0	0	0	0	0	0	0	0	0	0
Solyc01g012680.1.1	0	0	0	0	0	0	0	0	0	0	0	0
Solyc01g012690.1.1	0	0	0	0	0	0	0	0	0	0	0	0
Solyc01g012700.2.1	0	0	0	0	0	0	0	0	0	0	0	0
Solyc01g012710.1.1	0	0	0	0	0	0	0	0	0	0	0	0
Solyc01g012720.1.1	0	0	0	0	0	0	0	0	0	0	0	0
Solyc01g012730.1.1	0	0	0	0	0	0	0	0	0	0	0	0
Solyc01g012740.1.1	0	0	0	0	0	0	0	0	0	0	0	0
Solyc01g012750.1.1	0	0	0	0	0	0	0	0	0	0	0	0
Solyc01g012760.1.1	0	0	0	0	0	0	0	0	0	0	0	0
Solyc01g013760.1.1	0	0	0	0	0	0	0	0	0	0	0	0
Solyc01g013770.1.1	0	0	0	0	0	0	0	0	0	0	0	0
Solyc01g013780.1.1	0	0	0	0	0	0	0	0	0	0	0	0
Solyc01g013790.1.1	0	0	0	0	0	0	0	0	0	0	0	0
Solyc01g013800.1.1	0	0	0	0	0	0	0	0	0	0	0	0
Solyc01g013810.1.1	0	0	0	0	0	0	0	0	0	0	0	0
Solyc01g013820.1.1	0	0	0	0	0	0	0	0	0	0	0	0
Solyc01g013830.1.1	0	0	0	0	0	0	0	0	0	0	0	0
Solyc01g013840.1.1	0	0	0	0	0	0	0	0	0	0	0	0
Solyc01g013850.1.1	0	0	0	0	0	0	0	0	0	0	0	0
Solyc01g013860.1.1	0	0	0	0	0	0	0	0	0	0	0	0
Solyc01g013870.1.1	0	0	0	0	0	0	0	0	0	0	0	0
Solyc01g013880.1.1	0	0	0	0	0	0	0	0	0	0	0	0
Solyc01g013890.1.1	0	0	0	0	0	0	0	0	0	0	0	0
Solyc01g013900.2.1	0	0	0	0	0	0	0	0	0	0	0	0
Solyc01g013910.1.1	0	0	0	0	0	0	0	0	0	0	0	0
Solyc01g013920.1.1	0	0	0	0	0	0	0	0	0	0	0	0
Solyc01g013930.1.1	0	0	0	0	0	0	0	0	0	0	0	0
Solyc01g013940.1.1	0	0	0	0	0	0	0	0	0	0	0	0
Solyc01g013950.1.1	0	0	0	0	0	0	0	0	0	0	0	0
Solyc01g013960.1.1	0	0	0	0	0	0	0	0	0	0	0	0
Solyc01g013970.1.1	0	0	0	0	0	0	0	0	0	0	0	0
Solyc01g013980.1.1	0	0	0	0	0	0	0	0	0	0	0	0
Solyc01g013990.1.1	0	0	0	0	0	0	0	0	0	0	0	0
Solyc01g014000.1.1	0	0	0	0	0	0	0	0	0	0	0	0
Solyc01g014010.1.1	0	0	0	0	0	0	0	0	0	0	0	0
Solyc01g014020.1.1	0	0	0	0	0	0	0	0	0	0	0	0
Solyc01g014030.1.1	0	0	0	0	0	0	0	0	0	0	0	0
Solyc01g014040.1.1	0	0	0	0	0	0	0	0	0	0	0	0
Solyc01g014050.1.1	0	0	0	0	0	0	0	0	0	0	0	0
Solyc01g014060.1.1	0	0	0	0	0	0	0	0	0	0	0	0
Solyc01g014070.1.1	0	0	0	0	0	0	0	0	0	0	0	0
Solyc01g014080.1.1	0	0	0	0	0	0	0	0	0	0	0	0
Solyc01g014090.1.1	0	0.0343178	0	0.0373488	0	0	0	0	0	0	0	0
Solyc01g014100.2.1	3.10893	1.64725	1.09168	1.26986	0.212133	0.460041	0.228806	0.474495	0	0.0289795	0	0.0314013
Solyc01g014110.2.1	1.31894	2.98565	2.18337	2.95056	1.80313	1.44584	0.972424	0.474495	0.992743	1.36204	1.28517	0.659428
Solyc01g014120.2.1	1.8842	3.19156	3.74292	1.86744	1.80313	1.57728	0.915223	1.80901	0.772133	1.44897	0.942457	0.973441
Solyc01g014130.1.1	0	0	0	0	0	0	0	0	0	0	0	0
Solyc01g014140.2.1	0.0942101	0.205907	0	0.0373488	0.106066	0	0.0572014	0.0296559	0	0.0289795	0	0
Solyc01g014150.1.1	0	0	0	0	0	0	0	0.0889678	0	0.0289795	0	0
Solyc01g014160.1.1	0	0	0	0	0	0	0	0	0	0	0	0
Solyc01g014170.1.1	0	0	0	0	0	0	0	0	0	0	0	0
Solyc01g014180.2.1	143.105	159.544	197.907	200.713	201.42	175.736	203.465	179.685	202.63	197.031	208.026	195.724
Solyc01g014190.1.1	0	0	0	0	0	0	0	0	0	0	0	0
Solyc01g014200.1.1	0.56526	0.652038	1.24764	0.709628	1.16673	0.591482	1.31563	0.474495	0.882438	0.579589	0.42839	0.502421
Solyc01g014210.1.1	0	0	0	0	0	0	0	0	0	0	0	0
Solyc01g014220.1.1	0.18842	0.0343178	0.155955	0	0	0	0	0	0	0.115918	0.257034	0.0314013
Solyc01g014230.2.1	19.9725	19.9386	19.6503	18.8985	18.4556	19.7161	20.7641	23.962	19.193	19.9669	18.2494	22.4519
Solyc01g014240.1.1	0	0	0	0	0	0	0	0	0	0	0	0
Solyc01g014250.2.1	5.6526	5.79971	5.77033	7.69386	22.4861	23.725	71.9594	72.9536	33.0914	30.5444	70.77	66.0056
Solyc01g014260.1.1	0	0	0	0	0	0.0657202	0	0.0296559	0	0	0.0856779	0.0628026
Solyc01g014270.2.1	3.01472	3.91223	2.96314	4.33246	2.65166	2.69453	5.26253	3.82562	3.30914	2.49223	2.3133	2.88892
Solyc01g014280.2.1	18.5594	28.7583	7.48583	9.33721	2.01526	9.20083	1.77324	2.69869	6.06676	2.2604	4.88364	4.64739
Solyc01g014290.1.1	1.22473	1.61294	0.623819	0.373488	0.212133	0.657202	0.0572014	0.0296559	0.330914	0.115918	0.0856779	0.345414
Solyc01g014300.1.1	0	0.137271	0.155955	0	0	0	0	0	0	0.0289795	0	0
Solyc01g014310.1.1	0	0	0	0	0	0	0	0	0	0	0	0
Solyc01g014320.2.1	0	0.0343178	0	0	0	0.0657202	0	0	0	0	0	0
Solyc01g014330.2.1	0	0	0	0	0	0	0	0	0	0	0	0
Solyc01g014340.1.1	0	0	0	0	0	0	0	0	0	0	0	0
Solyc01g014350.1.1	0	0	0	0	0	0	0	0	0	0	0	0
Solyc01g014360.1.1	0	0	0	0	0	0	0	0	0	0	0	0
Solyc01g014370.1.1	0	0	0	0	0	0	0	0	0	0	0	0
Solyc01g014380.2.1	0.847891	1.44135	1.55955	1.08312	0.954598	1.643	0.743619	0.830367	0.992743	1.39101	0.942457	0.533822
Solyc01g014390.2.1	0	0	0	0	0.106066	0.13144	0.171604	0.0889678	0.22061	0.115918	0	0
Solyc01g014400.1.1	0	0	0	0	0	0	0	0	0	0	0	0
Solyc01g014410.1.1	0	0	0	0	0	0	0	0	0	0	0	0
Solyc01g014420.1.1	0	0	0	0	0	0	0	0	0	0	0	0
Solyc01g014430.1.1	0	0	0	0	0	0	0	0	0	0	0	0
Solyc01g014440.1.1	0	0	0	0	0	0	0	0	0	0	0	0
Solyc01g014450.1.1	0	0	0	0	0	0	0	0	0	0	0	0
Solyc01g014460.1.1	0	0	0	0	0	0	0	0	0	0	0	0
Solyc01g014470.1.1	0.847891	1.02953	0.779774	1.00842	1.06066	0.788642	1.02963	1.06761	0.441219	1.10122	0.856779	0.753631
Solyc01g014480.2.1	27.1325	27.969	26.8242	29.9538	26.0923	26.4852	25.6262	28.4697	26.0319	24.6615	26.1318	25.1839
Solyc01g014490.2.1	35.894	39.3282	28.8516	32.232	29.0622	32.7287	34.2065	36.3878	36.9521	37.0358	34.0141	32.3748
Solyc01g014500.1.1	0	0	0	0	0	0	0	0	0	0	0	0
Solyc01g014510.1.1	0	0	0	0	0	0	0	0	0	0	0	0
Solyc01g014520.1.1	0	0	0	0	0	0	0	0	0	0	0	0
Solyc01g014530.2.1	0	0	0	0	0	0	0	0	0	0	0	0
Solyc01g014540.1.1	0	0	0	0	0	0	0	0	0	0	0	0
Solyc01g014550.1.1	0	0	0	0	0	0	0	0	0	0	0	0
Solyc01g014560.2.1	0	0	0	0	0	0	0	0	0	0	0	0
Solyc01g014570.1.1	0	0	0	0	0	0	0	0	0	0	0	0
Solyc01g014580.1.1	0	0	0	0	0	0	0	0	0	0	0	0
Solyc01g014600.1.1	0	0	0	0	0	0	0	0	0	0	0	0
Solyc01g014610.1.1	0	0	0	0	0.106066	0.0657202	0	0.0296559	0	0.0579589	0.171356	0.0942039
Solyc01g014620.1.1	2.54367	1.9218	1.24764	1.56865	1.06066	2.23449	1.65884	1.63108	0.551524	0.956323	0.685424	0.785033
Solyc01g014630.1.1	0	0	0	0	0	0	0	0	0	0	0	0
Solyc01g014640.1.1	0	0	0	0	0	0	0	0	0	0	0	0
Solyc01g014650.1.1	0	0	0	0	0	0	0	0	0	0	0	0
Solyc01g014660.1.1	0	0	0	0	0	0	0	0	0	0	0	0
Solyc01g014670.1.1	0	0	0	0	0	0	0	0	0	0	0	0
Solyc01g014680.1.1	0	0	0	0	0	0	0	0	0	0	0	0
Solyc01g014690.2.1	0	0	0	0	0	0	0	0	0	0	0	0
Solyc01g014700.2.1	0	0	0	0	0	0	0	0	0	0	0	0
Solyc01g014710.1.1	0	0	0	0	0	0	0	0	0	0	0	0
Solyc01g014720.1.1	0	0	0	0	0	0	0	0	0	0	0	0
Solyc01g014730.1.1	0	0	0	0	0	0	0	0	0	0	0	0
Solyc01g014740.1.1	0	0	0	0.0373488	0	0	0	0	0	0	0	0
Solyc01g014760.1.1	0	0	0	0	0	0	0	0	0	0	0	0
Solyc01g014770.1.1	0	0	0	0	0	0	0	0	0	0	0	0
Solyc01g014780.1.1	0	0	0	0	0	0	0	0	0	0	0	0
Solyc01g014790.1.1	0	0	0	0	0	0	0	0	0	0	0	0
Solyc01g014800.1.1	0	0	0	0	0	0	0	0	0	0	0	0
Solyc01g014820.1.1	0	0	0	0	0	0	0	0	0	0	0	0
Solyc01g014830.1.1	0	0	0	0	0	0	0	0	0	0	0	0
Solyc01g014840.2.1	0.65947	0.652038	0.155955	0.485535	0.212133	0.13144	0.286007	0.415183	0.882438	0.724487	0.771102	0.942039
Solyc01g014850.2.1	67.5486	63.0075	68.6201	60.281	70.1099	67.6918	72.417	73.8433	88.685	92.5894	89.1907	85.757
Solyc01g014860.2.1	0	0	0	0	0	0	0	0	0	0	0	0
Solyc01g014870.1.1	0	0	0	0	0	0	0	0	0	0	0	0
Solyc01g014880.2.1	0	0	0	0	0	0	0	0	0	0	0	0
Solyc01g014890.1.1	0	0	0	0	0	0	0	0	0	0	0	0
Solyc01g014900.1.1	0	0	0	0	0	0	0	0	0	0	0	0
Solyc01g014910.1.1	0	0	0	0	0	0	0	0	0	0	0	0
Solyc01g014920.1.1	0	0	0	0	0	0	0	0	0	0	0	0
Solyc01g014930.1.1	0	0	0	0	0	0	0	0	0	0	0	0
Solyc01g014940.1.1	0	0	0	0	0	0	0	0	0	0	0	0
Solyc01g014950.1.1	0	0	0	0	0	0	0	0	0	0	0	0
Solyc01g014960.1.1	0	0	0	0	0	0	0	0	0	0	0	0
Solyc01g014970.1.1	0	0	0	0	0	0	0	0	0	0	0	0
Solyc01g014980.2.1	0	0	0	0	0	0	0	0	0	0	0	0
Solyc01g014990.1.1	0	0	0.155955	0	0	0	0	0	0	0	0	0
Solyc01g015000.2.1	0.0942101	0	0	0	0	0	0	0	0	0	0	0.0314013
Solyc01g015010.1.1	0	0	0	0	0	0	0	0	0	0	0	0
Solyc01g015020.2.1	69.527	81.7107	79.8489	85.118	77.6406	80.6387	77.0503	77.0165	66.2932	72.4197	83.9644	81.0782
Solyc01g015030.1.1	0	0	0	0	0	0	0	0	0	0	0	0
Solyc01g015040.1.1	1.13052	0.754992	0.467864	0.784326	0.424266	0.920083	0.629216	0.622775	0.772133	0.492651	1.11381	0.282612
Solyc01g015050.1.1	1.78999	1.78453	2.33932	0.373488	0.848531	2.16877	1.54444	2.07592	1.54427	1.70979	1.11381	1.03624
Solyc01g015060.1.1	2.16683	1.88748	1.09168	0.560233	0.848531	1.97161	2.74567	2.28351	1.21335	1.62285	1.19949	1.63287
Solyc01g015070.2.1	7.81943	8.40786	17.6229	10.3083	11.7734	9.92375	10.2391	9.90509	7.72133	7.38976	7.02559	5.77784
Solyc01g015080.2.1	0	0	0	0	0	0	0	0	0	0	0	0
Solyc01g015090.1.1	0	0	0	0	0	0	0	0	0	0	0	0
Solyc01g015100.1.1	0	0	0	0	0	0	0	0	0	0	0	0
Solyc01g015110.1.1	0	0.0343178	0	0	0	0	0.114403	0.0593119	0	0.0289795	0	0
Solyc01g015120.1.1	0	0	0	0	0	0	0	0	0	0	0	0
Solyc01g015130.1.1	0	0	0	0	0	0	0	0	0	0	0	0
Solyc01g015140.1.1	0	0	0	0	0	0	0	0	0	0	0	0
Solyc01g015150.1.1	0	0	0	0	0	0	0	0	0	0	0	0
Solyc01g015160.1.1	0	0	0	0	0	0	0	0	0	0	0	0
Solyc01g015170.1.1	0	0	0	0	0	0	0	0	0	0	0	0
Solyc01g015180.1.1	0	0	0	0	0	0	0	0	0	0	0	0
Solyc01g015190.1.1	0	0	0	0	0	0	0	0	0	0	0	0
Solyc01g015200.1.1	0	0	0	0	0	0	0	0	0	0	0	0
Solyc01g015210.1.1	0	0	0	0	0	0	0	0	0	0	0	0
Solyc01g015220.1.1	0	0	0	0	0	0	0	0	0	0	0	0
Solyc01g015230.1.1	0	0	0	0	0	0	0	0	0	0	0	0
Solyc01g015240.1.1	0	0	0	0	0	0	0	0	0	0	0	0
Solyc01g015250.1.1	0	0	0	0	0	0	0	0	0	0	0	0
Solyc01g015260.1.1	0	0	0	0	0	0.0657202	0	0.0889678	0.110305	0	0.0856779	0
Solyc01g015270.1.1	0	0	0	0	0	0	0	0	0	0	0	0
Solyc01g015280.1.1	0	0	0	0	0	0	0	0	0	0	0	0
Solyc01g015290.1.1	0	0	0	0	0	0	0	0	0	0	0	0
Solyc01g015300.1.1	0	0	0	0.0373488	0	0	0	0	0.110305	0	0	0
Solyc01g016300.1.1	0	0	0	0	0	0	0	0	0	0	0	0
Solyc01g016310.1.1	0	0	0	0	0	0	0	0	0	0	0	0
Solyc01g016320.1.1	0	0	0	0	0	0	0	0	0	0	0	0
Solyc01g016330.1.1	0	0	0	0	0	0	0	0	0	0	0	0
Solyc01g016340.1.1	0	0	0	0	0	0	0	0	0	0	0	0
Solyc01g016350.1.1	0	0	0	0	0	0	0	0	0	0	0	0
Solyc01g016360.1.1	0	0	0	0	0	0	0	0	0	0	0	0
Solyc01g016370.1.1	0	0	0	0	0	0	0	0	0	0	0	0
Solyc01g016380.2.1	0.0942101	0.0686356	0.31191	0	0	0.0657202	0.114403	0.0889678	0	0	0.0856779	0
Solyc01g016390.2.1	0	0	0	0	0	0	0	0	0	0.0289795	0.0856779	0
Solyc01g016400.1.1	0	0.137271	0	0	0	0	0.0572014	0	0	0.0869384	0.0856779	0.0314013
Solyc01g016410.2.1	5.46418	5.90266	7.64179	6.76014	6.68218	5.65194	7.66499	6.465	6.61829	5.44814	7.3683	6.21746
Solyc01g016430.1.1	0	0	0	0	0	0	0	0	0	0	0	0
Solyc01g016450.1.1	0	0	0	0	0	0	0	0	0	0	0	0
Solyc01g016460.2.1	6.31207	8.16764	8.73347	7.17098	6.89432	7.22922	7.20738	7.88848	7.50072	5.70896	5.22635	5.52663
Solyc01g016470.2.1	91.1953	85.7602	87.4906	72.8302	91.6414	86.4878	104.335	92.4376	98.6125	74.825	90.9043	99.0083
Solyc01g016480.1.1	0	0	0	0	0	0	0	0	0	0	0	0
Solyc01g016510.1.1	0	0	0	0	0	0	0	0	0	0	0	0
Solyc01g016520.1.1	0	0	0	0	0	0	0	0	0	0	0	0
Solyc01g016530.1.1	0	0	0	0	0	0	0	0	0	0	0	0
Solyc01g016540.1.1	0	0	0	0	0	0	0.0572014	0	0	0	0.0856779	0
Solyc01g016550.1.1	0.0942101	0.0686356	0	0	0	0.13144	0.0572014	0.0296559	0.110305	0.463672	0.0856779	0.0942039
Solyc01g016560.1.1	14.5083	11.8396	16.2193	15.2757	15.5918	18.0731	13.2135	13.4935	12.685	11.5918	15.0793	12.9687
Solyc01g016570.1.1	6.5947	8.44218	7.9537	7.17098	5.62152	7.62354	7.77939	7.4733	5.84615	6.4914	7.28263	6.12326
Solyc01g016580.1.1	0	0	0	0	0	0	0	0	0	0	0	0
Solyc01g016590.1.1	0	0	0	0	0	0	0	0	0	0	0	0
Solyc01g016600.1.1	0	0	0	0	0	0	0	0	0	0.0289795	0	0
Solyc01g016610.1.1	0	0	0	0	0	0	0	0	0	0	0	0
Solyc01g016620.1.1	0	0	0	0	0	0	0	0	0	0	0	0
Solyc01g016630.1.1	0	0	0	0	0	0	0	0	0	0	0	0
Solyc01g016640.1.1	0	0	0	0	0	0	0	0	0	0	0	0
Solyc01g016650.1.1	0	0	0	0	0	0	0	0	0	0	0	0
Solyc01g016660.1.1	0	0	0	0	0	0	0	0	0	0	0	0
Solyc01g016670.1.1	0	0	0	0	0	0	0	0	0	0	0	0
Solyc01g016680.1.1	0	0	0	0	0	0	0	0	0	0	0	0
Solyc01g016690.1.1	0	0	0	0	0	0	0	0	0	0	0	0
Solyc01g016700.2.1	0	0	0	0	0	0	0	0	0	0	0	0
Solyc01g016710.1.1	0	0	0	0	0	0	0	0	0	0	0	0
Solyc01g016720.2.1	0.28263	0.514767	0.155955	0.63493	0.212133	0.0657202	0.572014	0.563463	0.772133	0.55061	0.514068	0.25121
Solyc01g016730.1.1	0	0	0	0	0	0	0	0	0	0	0	0
Solyc01g016740.1.1	0	0	0	0	0	0	0	0	0	0	0	0
Solyc01g016750.1.1	0	0	0	0	0	0	0	0	0	0	0.0856779	0
Solyc01g016760.1.1	0	0	0	0	0	0	0	0.0593119	0.110305	0	0	0
Solyc01g016770.1.1	0	0.30886	0.155955	0.112047	0	0.328601	0.171604	0.385527	0.551524	0.0869384	0.514068	0.282612
Solyc01g016780.1.1	0.28263	0.171589	0	0.112047	0.530332	0.525761	0.343209	0.444839	0.110305	0.173877	0.257034	0.502421
Solyc01g016790.1.1	0	0	0	0	0	0	0	0	0	0	0	0
Solyc01g016800.1.1	0	0	0.155955	0	0	0	0	0	0	0	0.0856779	0
Solyc01g016810.1.1	0	0.102953	0.155955	0.149395	0	0.13144	0	0.14828	0.110305	0.144897	0	0.0628026
Solyc01g016820.1.1	0	0	0	0	0	0	0	0	0	0	0	0
Solyc01g016830.1.1	0	0	0	0	0	0	0	0	0	0	0	0
Solyc01g016840.1.1	0	0	0	0	0	0	0	0	0	0	0	0
Solyc01g016850.1.1	0	0	0	0	0	0	0	0	0	0	0	0
Solyc01g016860.1.1	0	0	0	0	0	0	0	0	0	0	0	0
Solyc01g016870.1.1	0	0	0	0	0	0	0	0	0	0	0	0
Solyc01g016880.1.1	0	0	0	0	0	0	0	0	0	0	0	0
Solyc01g016890.1.1	0	0	0	0	0	0	0	0	0	0	0	0
Solyc01g016900.1.1	0	0	0	0	0	0	0	0	0	0	0	0
Solyc01g016910.1.1	0	0	0	0	0	0	0	0	0	0	0	0
Solyc01g016920.1.1	0	0	0	0	0	0	0	0	0	0	0	0
Solyc01g016930.1.1	0	0	0	0	0	0	0	0	0	0	0	0
Solyc01g016940.1.1	0	0	0	0	0	0	0	0	0	0	0	0
Solyc01g016950.1.1	0	0.0686356	0	0	0	0	0	0	0	0	0	0
Solyc01g016960.1.1	0	0	0	0	0	0	0	0	0	0	0	0
Solyc01g016970.1.1	0	0.0343178	0.155955	0	0	0	0	0.0296559	0	0	0	0
Solyc01g016980.1.1	0	0	0	0	0	0	0	0	0	0	0	0
Solyc01g016990.1.1	0	0	0	0	0	0	0	0	0	0	0	0
Solyc01g017000.1.1	0	0	0	0	0	0	0	0	0	0	0	0
Solyc01g017010.1.1	0	0	0	0	0	0	0	0	0	0	0	0
Solyc01g017020.1.1	0	0	0	0	0	0	0	0	0	0	0	0
Solyc01g017030.1.1	0	0	0	0	0	0	0	0	0	0	0	0
Solyc01g017040.1.1	0	0	0	0	0	0	0	0	0	0	0	0
Solyc01g017050.1.1	0	0	0	0	0.106066	0.0657202	0	0	0	0	0	0
Solyc01g017060.1.1	0	0	0	0	0	0	0	0	0	0	0	0
Solyc01g017070.1.1	0	0	0	0	0	0	0	0	0	0	0	0
Solyc01g017080.1.1	0	0	0	0	0	0	0	0	0	0	0	0
Solyc01g017090.2.1	0.47105	0.137271	0.467864	0.0746977	0.424266	0.0657202	0.171604	0.237248	0	0.231836	0.171356	0.0628026
Solyc01g017100.1.1	0.0942101	0.0343178	0.155955	0.0373488	0.106066	0.0657202	0.114403	0.237248	0	0.0869384	0.0856779	0.0314013
Solyc01g017110.1.1	0	0	0	0	0.106066	0	0.0572014	0.0296559	0	0	0	0
Solyc01g017120.1.1	0	0	0	0	0	0	0	0	0	0	0	0
Solyc01g017130.1.1	0	0	0	0	0	0	0	0	0	0	0	0
Solyc01g017140.1.1	0	0	0	0	0	0	0	0	0	0	0	0
Solyc01g017150.1.1	0	0	0	0	0	0	0	0	0	0	0	0
Solyc01g017160.1.1	0	0	0	0	0	0	0	0	0	0	0	0
Solyc01g017170.1.1	0	0	0	0	0	0	0	0	0	0	0	0
Solyc01g017180.1.1	0	0	0	0	0	0	0	0	0	0	0	0
Solyc01g017190.1.1	0	0	0	0	0	0	0	0	0	0	0	0
Solyc01g017200.1.1	0	0	0	0	0	0	0	0	0	0	0	0
Solyc01g017210.1.1	0	0	0	0	0	0	0	0	0	0	0	0
Solyc01g017220.1.1	0	0	0.155955	0	0	0	0	0	0	0	0	0
Solyc01g017230.1.1	0	0	0.31191	0.0746977	0	0.0657202	0	0.0593119	0	0	0	0.0628026
Solyc01g017240.1.1	0.0942101	0.0343178	0	0.0746977	0.106066	0	0.0572014	0.0593119	0.22061	0.0579589	0	0.0314013
Solyc01g017250.1.1	0	0	0	0	0	0	0	0	0	0	0	0.0314013
Solyc01g017260.1.1	0	0	0	0	0	0	0	0	0	0	0	0
Solyc01g017270.1.1	0	0	0	0	0	0	0	0	0	0	0	0
Solyc01g017280.1.1	0	0	0	0	0	0	0	0	0	0	0	0
Solyc01g017290.1.1	0	0	0	0	0	0	0	0	0	0	0	0
Solyc01g017300.1.1	0	0.0343178	0	0	0	0	0	0	0	0	0.0856779	0
Solyc01g017310.1.1	0	0	0	0	0	0	0	0	0	0	0	0
Solyc01g017320.1.1	0.28263	0	0	0.186744	0	0	0.0572014	0.0593119	0.110305	0	0	0.125605
Solyc01g017330.1.1	0.37684	0.823627	0	0.448186	0.636398	0.591482	0.40041	0.444839	0.22061	0.492651	0.257034	0.314013
Solyc01g017340.1.1	0	0	0	0	0	0.0657202	0	0	0	0.0579589	0	0.0314013
Solyc01g017350.1.1	0	0	0	0	0	0	0	0.0593119	0	0.0289795	0	0
Solyc01g017360.1.1	0	0.0343178	0	0	0	0	0	0.177936	0	0	0	0
Solyc01g017370.1.1	0	0	0	0	0	0	0.228806	0.0593119	0	0.0289795	0.171356	0.0314013
Solyc01g017380.1.1	0.0942101	0	0	0	0	0	0.114403	0.0296559	0	0.0869384	0	0.0314013
Solyc01g017390.1.1	0	0	0	0	0	0	0	0	0	0	0	0
Solyc01g017400.1.1	0	0.0686356	0	0.0373488	0.106066	0	0.0572014	0.0593119	0	0.0869384	0	0
Solyc01g017410.1.1	0	0	0	0	0	0	0	0	0	0	0	0
Solyc01g017420.1.1	0.18842	0	0	0.0373488	0	0.13144	0	0	0	0	0	0
Solyc01g017430.1.1	0	0	0	0	0	0	0	0	0	0	0	0
Solyc01g017440.1.1	0	0	0	0	0	0	0	0	0	0	0	0
Solyc01g017450.1.1	0	0	0	0	0	0	0	0	0	0	0	0
Solyc01g017460.1.1	0	0	0	0	0	0	0	0.0296559	0	0.0289795	0.0856779	0
Solyc01g017470.1.1	0	0	0	0	0	0.0657202	0.0572014	0	0	0	0	0
Solyc01g017480.1.1	0	0	0	0	0.212133	0	0.0572014	0.0296559	0	0	0	0
Solyc01g017490.1.1	2.54367	3.63769	1.24764	3.09995	1.16673	3.02313	2.80287	1.24555	1.98549	2.83999	1.5422	0.628026
Solyc01g017500.1.1	0	0	0	0	0	0	0	0	0	0	0	0
Solyc01g017510.1.1	0	0	0	0	0	0	0	0	0	0	0	0
Solyc01g017520.1.1	0	0.0343178	0	0	0.106066	0	0.0572014	0	0	0.0579589	0.0856779	0.0628026
Solyc01g017530.1.1	0.0942101	0.411814	0	0.186744	0.106066	0.0657202	0.228806	0.0889678	0	0.144897	0.171356	0.0942039
Solyc01g017540.1.1	0	0	0	0	0	0	0	0	0	0	0	0
Solyc01g017550.1.1	0	0.0343178	0	0.0373488	0.106066	0.13144	0.0572014	0.0889678	0	0.0289795	0.171356	0
Solyc01g017560.1.1	0.0942101	0.0686356	0.155955	0	0.212133	0	0.0572014	0	0	0.0289795	0	0
Solyc01g017570.1.1	0	0	0	0	0	0	0	0	0	0.0289795	0	0
Solyc01g017580.1.1	0	0	0	0	0	0	0	0	0	0	0	0
Solyc01g017590.1.1	0.65947	0.823627	2.18337	0.746977	0.212133	0.788642	0.80082	0.652431	0.772133	0.927343	0.171356	0.439618
Solyc01g017600.2.1	0	0	0.31191	0.0373488	0.106066	0.0657202	0	0.0296559	0	0.0289795	0.342712	0.219809
Solyc01g017610.1.1	0	0	0	0	0	0	0	0	0	0	0	0
Solyc01g017620.1.1	0	0	0	0	0	0	0	0	0	0	0	0
Solyc01g017630.1.1	0	0	0	0	0	0	0	0	0	0	0	0
Solyc01g017640.1.1	0	0	0	0	0	0	0	0	0	0	0	0
Solyc01g017650.1.1	0	0	0	0	0	0	0	0	0	0	0	0
Solyc01g017660.1.1	0	0	0	0	0	0	0	0	0	0	0	0
Solyc01g017670.1.1	0	0	0	0	0	0	0	0	0	0	0	0
Solyc01g017680.1.1	0	0	0	0	0	0	0	0	0	0	0	0
Solyc01g017690.1.1	0	0	0	0	0	0	0	0	0	0	0	0
Solyc01g017700.1.1	0	0	0	0	0	0	0	0	0	0	0	0
Solyc01g017710.1.1	0	0.137271	0.155955	0.0373488	0.106066	0	0.114403	0.0889678	0	0.0579589	0.0856779	0.0942039
Solyc01g017720.1.1	0.65947	0.480449	0.467864	0.485535	0.212133	0.13144	0.171604	0.355871	0.330914	0.347754	0	0.345414
Solyc01g017730.1.1	0.75368	0.411814	0.779774	0.261442	0.424266	0.0657202	0.171604	0.860023	0.441219	0.347754	0.514068	0.345414
Solyc01g017740.1.1	1.22473	0.480449	0.935729	0.448186	0.424266	0.197161	0.629216	0.593119	1.10305	0.55061	0.771102	0.596625
Solyc01g017750.1.1	0	0	0	0	0	0	0	0	0	0	0	0
Solyc01g017760.1.1	0	0	0	0	0	0	0	0	0	0	0	0
Solyc01g017770.1.1	0	0	0	0	0	0	0	0	0	0	0	0
Solyc01g017780.1.1	0	0	0	0	0	0	0	0	0	0	0	0
Solyc01g017790.1.1	0	0	0	0	0	0	0	0	0	0	0	0
Solyc01g017800.1.1	0	0	0	0	0	0	0	0	0	0	0	0
Solyc01g017810.1.1	0	0	0	0	0	0	0	0	0	0	0	0
Solyc01g017820.1.1	0	0	0	0	0	0	0	0	0	0	0	0
Solyc01g017830.1.1	0	0	0	0	0	0	0	0	0	0	0	0
Solyc01g017840.1.1	0	0	0	0	0	0	0	0	0	0	0	0
Solyc01g017850.1.1	0	0	0	0	0	0	0	0	0	0	0	0
Solyc01g017860.2.1	1.31894	1.06385	2.49528	1.30721	0.848531	1.18296	1.25843	1.30486	1.43396	0.956323	0.942457	1.00484
Solyc01g017870.1.1	0	0	0	0	0	0.0657202	0	0	0	0	0	0.0314013
Solyc01g017880.1.1	0	0	0	0	0	0	0	0	0	0	0	0
Solyc01g017890.1.1	0	0	0	0	0	0	0	0	0	0	0	0
Solyc01g017900.1.1	0	0	0	0	0	0	0	0	0	0	0	0
Solyc01g017910.1.1	0	0	0	0	0	0	0	0	0	0	0	0
Solyc01g017920.1.1	0	0	0	0	0	0	0	0	0	0	0	0
Solyc01g017930.1.1	0	0	0	0	0	0	0	0	0	0	0	0
Solyc01g017940.1.1	0	0	0	0	0	0	0	0	0	0	0	0
Solyc01g017950.1.1	0	0	0	0	0	0	0	0	0	0	0	0
Solyc01g017960.1.1	0	0	0	0	0	0	0	0	0	0	0	0
Solyc01g017970.1.1	0	0	0	0	0	0	0	0	0	0	0	0
Solyc01g017980.1.1	0	0	0	0	0	0	0	0	0	0	0	0
Solyc01g017990.1.1	0	0	0	0	0	0	0	0	0	0	0	0
Solyc01g018000.1.1	0	0	0	0	0	0	0	0	0	0	0	0
Solyc01g018010.1.1	1.03631	1.16681	2.02741	0.560233	1.06066	0.985803	0.858021	0.860023	1.32366	0.811425	1.02814	0.753631
Solyc01g018020.1.1	0.18842	0.274542	0.31191	0.149395	0	0.13144	0.343209	0.266904	0.22061	0.0579589	0.171356	0.0628026
Solyc01g018040.1.1	0	0	0	0	0	0	0	0	0	0	0	0
Solyc01g018050.1.1	0	0	0	0	0	0	0	0	0	0	0	0
Solyc01g018060.1.1	0	0	0	0	0	0	0	0	0	0	0	0
Solyc01g018070.1.1	0	0	0	0	0	0	0	0	0	0	0	0
Solyc01g018080.1.1	0	0	0	0	0	0	0	0	0	0	0	0
Solyc01g018090.1.1	0	0	0	0	0.106066	0	0	0	0.110305	0.0289795	0	0
Solyc01g018100.1.1	0	0	0	0	0	0	0	0	0	0	0	0
Solyc01g019100.1.1	0	0	0	0	0	0	0	0	0	0	0	0
Solyc01g020100.1.1	0	0	0	0	0	0	0	0	0	0	0	0
Solyc01g020110.1.1	0	0	0	0	0	0	0	0	0	0	0	0
Solyc01g020120.1.1	0	0	0	0	0	0	0	0	0	0	0	0
Solyc01g020130.2.1	0.18842	0.137271	0.31191	0.448186	1.16673	0.262881	0.686417	0.771055	1.32366	1.62285	1.62788	1.13045
Solyc01g020140.2.1	0.28263	0.102953	0.155955	0.186744	0.106066	0.460041	0.286007	0.355871	0.110305	0.956323	0.942457	0.502421
Solyc01g020150.2.1	0.847891	0.617721	0	0.410837	0.742465	0.0657202	0.686417	0.444839	0.772133	2.20244	3.68415	1.38166
Solyc01g020160.1.1	0.18842	0.0343178	0	0	0	0	0.343209	0.237248	0.330914	0.666528	0.685424	0.565224
Solyc01g020170.1.1	0	0	0	0	0	0	0	0	0	0	0	0
Solyc01g020180.1.1	0	0	0	0	0	0	0	0	0	0	0	0
Solyc01g020190.2.1	0.0942101	0.0686356	0	0.0373488	0	0.0657202	0	0	0.110305	0.173877	0.0856779	0.0314013
Solyc01g020200.1.1	0.47105	0.343178	1.09168	0.112047	0.848531	0.197161	0.114403	1.12693	0.22061	0.724487	0.171356	0.439618
Solyc01g020210.1.1	0	0	0	0	0	0	0	0	0	0	0	0
Solyc01g020220.1.1	3.10893	3.29451	3.1191	4.07102	2.01526	3.48317	3.31768	3.58837	2.2061	3.62243	4.2839	2.5121
Solyc01g020230.2.1	1.13052	1.20112	1.55955	0.485535	0.636398	0.788642	0.514813	1.0083	0.330914	0.956323	0.856779	0.628026
Solyc01g020240.2.1	42.5829	41.0441	46.0067	42.1295	33.8352	39.4978	41.6998	41.0735	41.0334	38.7745	39.0691	37.9328
Solyc01g020250.1.1	0	0	0	0	0	0	0	0	0	0	0	0
Solyc01g020260.1.1	0	0	0	0	0	0	0	0	0	0	0	0
Solyc01g020270.1.1	0	0	0	0	0	0	0	0	0	0	0	0
Solyc01g020280.1.1	0	0	0	0	0	0	0	0	0	0	0	0
Solyc01g020290.1.1	0	0	0	0	0	0	0	0.0296559	0	0	0	0
Solyc01g020300.2.1	0	0	0	0	0	0	0	0	0	0	0	0
Solyc01g020310.1.1	0	0	0	0	0	0	0	0	0	0	0	0
Solyc01g020320.2.1	2.63788	2.36793	2.65123	2.57707	2.43953	1.77444	2.05925	2.93594	1.54427	1.9706	1.88491	2.3551
Solyc01g020330.2.1	2.8263	3.05429	3.89887	3.02526	3.39412	3.22029	2.86007	2.2242	3.52975	1.73877	4.45525	2.3865
Solyc01g020340.1.1	2.73209	2.81406	2.18337	2.27828	0.954598	2.30021	2.23086	2.28351	2.75762	1.59387	3.17008	1.85268
Solyc01g020350.1.1	0	0	0	0	0.212133	0	0	0	0	0.0289795	0	0.0628026
Solyc01g020360.1.1	0	0	0	0	0	0	0	0	0	0	0	0
Solyc01g020370.1.1	0	0	0	0	0	0	0	0	0	0	0	0
Solyc01g020380.1.1	0	0	0	0	0	0	0	0	0	0	0	0
Solyc01g020390.1.1	0	0	0	0	0	0	0	0	0	0	0	0
Solyc01g020400.1.1	0	0	0	0	0	0	0	0	0	0	0	0
Solyc01g020410.1.1	0	0	0	0	0	0	0	0	0	0	0	0
Solyc01g020430.1.1	0	0	0	0	0	0	0	0	0	0	0	0
Solyc01g020440.2.1	52.004	47.084	40.0804	37.4609	34.1534	36.2775	40.5558	42.9122	45.1147	48.3378	43.4387	41.7009
Solyc01g020450.1.1	0	0	0	0	0	0	0	0	0	0	0	0
Solyc01g020460.1.1	0	0	0	0	0	0	0	0	0	0	0	0
Solyc01g020470.1.1	0	0	0	0	0	0	0	0	0	0	0	0
Solyc01g020480.1.1	0	0	0	0	0	0	0	0	0	0	0	0
Solyc01g020490.1.1	0	0	0	0	0	0	0	0	0	0	0	0
Solyc01g020500.1.1	1.13052	1.26976	1.09168	0.672279	0.636398	1.05152	0.915223	1.63108	0.661829	1.1302	1.5422	0.879237
Solyc01g020510.1.1	0	0	0	0	0	0	0	0	0	0	0	0
Solyc01g020520.2.1	4.89892	6.82924	6.5501	5.90112	4.66692	6.44058	5.83455	5.81257	5.18432	6.3465	5.65474	5.21262
Solyc01g020530.1.1	0	0	0	0	0	0	0	0	0	0	0	0
Solyc01g020550.1.1	0	0	0	0	0	0	0	0	0	0	0	0
Solyc01g020560.1.1	0	0	0	0	0	0	0	0	0	0	0	0
Solyc01g020570.1.1	0	0	0	0	0	0	0	0	0	0	0	0
Solyc01g020580.1.1	0	0	0	0	0	0	0	0	0	0	0	0
Solyc01g020590.1.1	0	0	0	0	0	0	0	0	0	0	0	0
Solyc01g020600.1.1	0	0	0	0	0	0	0	0	0	0	0	0
Solyc01g021600.2.1	0	0.0343178	0	0	0	0	0	0	0	0.0869384	0	0.0942039
Solyc01g021610.1.1	0	0	0	0	0	0	0	0	0	0	0	0
Solyc01g021620.1.1	0	0	0	0	0	0	0	0	0	0	0	0
Solyc01g021630.1.1	0	0	0	0	0	0	0	0	0	0	0	0
Solyc01g021640.2.1	16.3925	18.0512	14.5038	15.3877	16.3342	13.144	16.3024	17.6453	19.5239	19.4742	18.1637	16.1717
Solyc01g021650.1.1	0	0	0	0	0	0	0	0	0	0	0	0
Solyc01g021660.1.1	0	0	0	0	0	0	0	0	0	0	0	0
Solyc01g021670.2.1	10.7399	11.3592	7.9537	8.88902	8.59138	8.28074	10.9827	10.8244	14.3396	10.4616	13.1087	10.2054
Solyc01g021680.1.1	0	0	0	0	0	0	0	0	0	0.0289795	0	0
Solyc01g021690.1.1	0	0	0	0	0	0	0	0	0	0	0	0
Solyc01g021700.1.1	0	0	0	0	0	0	0	0	0	0	0	0
Solyc01g021710.1.1	0	0	0	0	0	0	0	0	0	0	0	0
Solyc01g021720.1.1	0.65947	0.78931	0.779774	1.34456	1.69706	0.591482	0.572014	0.889678	0.882438	0.318774	1.02814	0.596625
Solyc01g021730.2.1	0	0.171589	0.155955	0.224093	0.530332	0.262881	0.0572014	0	0	0.173877	0.342712	0.219809
Solyc01g021740.1.1	2.44946	1.23544	1.40359	2.12888	1.80313	1.643	1.25843	1.45314	2.09579	2.23142	1.11381	1.41306
Solyc01g022740.2.1	14.9794	17.9825	16.0633	18.5997	17.3949	18.0731	18.1901	18.357	16.8766	16.1995	14.908	16.5485
Solyc01g022750.2.1	61.2365	53.0897	59.7307	50.3462	68.625	61.2512	66.6397	53.3807	66.4035	52.163	70.5129	57.4016
Solyc01g022760.1.1	0	0	0	0	0	0	0	0	0	0	0	0
Solyc01g022770.1.1	0	0	0	0	0	0	0	0	0	0	0	0
Solyc01g022780.1.1	0	0.0686356	0.155955	0.0373488	0	0.197161	0.0572014	0	0	0	0.0856779	0
Solyc01g022790.1.1	0	0	0	0	0	0	0	0	0	0	0	0
Solyc01g028800.1.1	1.13052	0.78931	0.623819	0.709628	0.848531	1.11724	0.743619	0.978646	1.65457	1.30408	1.19949	1.28745
Solyc01g028810.2.1	1074.84	1074.32	952.26	1054.77	1033.51	1174.68	1079.91	1001.54	981.161	910.448	1002.35	965.465
Solyc01g028830.2.1	17.1462	15.3401	14.1919	14.8275	13.0462	12.224	20.8785	21.9157	22.8331	21.2999	23.3044	22.8916
Solyc01g028840.1.1	0	0	0	0	0	0	0	0	0	0	0	0
Solyc01g028850.1.1	0	0	0	0	0	0	0	0	0	0	0	0
Solyc01g028860.2.1	684.436	722.424	703.824	760.908	725.6	731.991	721.71	741.933	809.196	836.348	795.434	765.941
Solyc01g028870.2.1	22.893	24.3313	28.0719	22.2973	24.0771	21.4248	23.3954	26.5717	26.0319	27.7334	21.9336	20.7877
Solyc01g028880.1.1	0	0	0	0	0	0	0	0	0	0	0	0
Solyc01g028890.1.1	0	0	0	0	0	0	0	0	0	0	0	0
Solyc01g028900.2.1	46.3513	45.4711	55.208	51.5414	52.715	47.1214	47.4772	48.9916	52.836	57.2634	55.0052	55.8943
Solyc01g028910.1.1	0	0	0	0	0	0	0	0	0	0	0	0
Solyc01g028920.1.1	0	0	0	0	0	0	0	0	0	0	0	0
Solyc01g028930.2.1	16.2983	19.4239	19.0265	16.0227	15.5918	16.4958	17.618	23.0427	18.4209	20.1697	16.6215	18.0872
Solyc01g028940.1.1	0	0	0	0	0	0	0	0	0	0	0	0
Solyc01g028950.1.1	0	0	0	0	0	0	0	0	0	0	0	0
Solyc01g028960.1.1	0	0	0	0	0	0	0	0	0	0	0	0
Solyc01g028970.1.1	0	0	0	0	0	0	0	0	0	0	0	0
Solyc01g028980.1.1	0	0	0	0	0	0	0	0	0	0	0	0
Solyc01g033980.2.1	3.86261	3.63769	4.36673	3.99633	4.24266	4.92901	3.9469	4.32977	3.30914	4.49182	4.02686	4.96141
Solyc01g033990.1.1	0	0	0	0	0	0	0	0	0	0	0	0
Solyc01g034000.1.1	0	0	0	0	0	0	0	0	0	0	0	0
Solyc01g034010.1.1	0	0	0	0	0	0	0	0	0	0	0	0
Solyc01g034020.2.1	95.0579	95.781	90.4538	83.8481	82.4136	89.5109	93.1239	91.4886	92.1045	91.8649	82.2508	84.9719
Solyc01g034030.1.1	0	0	0	0	0	0	0	0	0	0	0	0
Solyc01g034040.1.1	0	0.0343178	0	0	0	0	0	0	0	0.0289795	0	0.0314013
Solyc01g034050.1.1	0	0	0	0	0	0	0	0	0	0	0	0
Solyc01g034060.1.1	0	0	0	0	0	0	0	0	0	0	0	0
Solyc01g034070.1.1	0	0	0	0	0	0	0	0	0	0	0	0
Solyc01g034080.1.1	0.65947	0.926581	0.779774	1.26986	0.954598	2.03733	1.54444	1.86832	1.65457	1.59387	1.28517	2.13529
Solyc01g034090.1.1	0	0	0	0	0	0	0	0	0	0	0	0
Solyc01g034100.1.1	0	0	0	0	0	0	0	0	0	0	0	0
Solyc01g034110.1.1	0	0	0	0	0	0	0	0	0	0	0	0
Solyc01g034120.2.1	0	0	0	0	0	0	0	0	0	0	0	0
Solyc01g034130.1.1	0	0	0	0	0	0	0	0	0	0	0	0
Solyc01g034140.1.1	0	0	0	0	0	0	0	0	0	0	0	0
Solyc01g034150.2.1	22.2336	27.7974	32.1267	30.1032	24.5013	26.7481	26.3699	30.6643	26.6938	27.6174	29.3875	22.7345
Solyc01g034160.1.1	0	0	0	0	0	0	0	0	0	0	0	0
Solyc01g034170.1.1	0	0	0	0	0	0	0	0	0	0	0	0
Solyc01g034180.1.1	0	0	0	0.0746977	0.106066	0.13144	0.171604	0	0	0	0	0
Solyc01g034190.1.1	0	0	0	0	0	0	0	0	0	0	0	0
Solyc01g034200.1.1	0	0	0	0	0	0	0	0	0	0	0	0
Solyc01g034210.1.1	0	0	0	0	0	0	0	0	0	0	0	0
Solyc01g034220.1.1	0	0.0686356	0	0.0373488	0	0.0657202	0.171604	0	0	0	0	0
Solyc01g035220.1.1	0	0	0	0	0	0	0	0	0	0	0	0
Solyc01g038220.1.1	0	0	0	0	0	0	0	0	0	0	0	0
[truncated: 32,726 more rows]

## Sheet: S. peruvianum
geneid	MVM1	MVM2	LVM1	LVM2	TM1	TM2	FM1	FM2	SIM1	SIM2
Solyc00g005000.2.1	0.0424318	0.0408031	0	0.0458437	0	0	0	0	0	0.0465931
Solyc00g005020.1.1	0	0	0	0	0	0	0	0	0	0
Solyc00g005040.2.1	0.0424318	0	0	0.0916873	0	0.0508513	0	0	0.093278	0
Solyc00g005050.2.1	31.1449	31.3776	27.8391	26.3143	33.9263	33.1042	31.7565	31.3892	29.1027	31.6367
Solyc00g005060.1.1	0	0	0	0	0	0	0	0	0	0
Solyc00g005070.1.1	0	0	0	0	0	0	0	0	0	0
Solyc00g005080.1.1	0	0	0	0	0	0	0	0	0	0
Solyc00g005090.1.1	0	0	0	0	0	0	0	0	0	0
Solyc00g005100.1.1	0	0	0	0	0	0	0	0	0	0
Solyc00g005110.1.1	0	0	0	0	0	0	0	0	0	0.0465931
Solyc00g005120.1.1	0	0	0	0	0	0	0	0	0	0
Solyc00g005130.1.1	0	0	0	0	0	0	0	0	0	0
Solyc00g005140.1.1	0	0	0	0	0.0516382	0	0	0	0	0
Solyc00g005150.1.1	0	0	0.048755	0.0458437	0.0516382	0	0	0	0.046639	0.0465931
Solyc00g005160.1.1	0	0	0	0	0	0	0	0	0	0
Solyc00g005170.1.1	0	0	0	0	0	0	0	0	0	0
Solyc00g005180.1.1	0.297022	0.0816063	0	0.183375	0.154915	0	0	0.0593369	0.046639	0
Solyc00g005280.1.1	0	0	0	0	0	0	0	0	0	0
Solyc00g005420.1.1	0	0	0	0	0	0	0	0	0	0
Solyc00g005430.1.1	0.0424318	0.0816063	0	0.137531	0.0516382	0.0508513	0	0	0	0
Solyc00g005440.1.1	4.75236	5.10039	6.09438	6.5098	1.70406	2.03405	2.77025	3.08552	5.08365	3.96041
Solyc00g005450.1.1	0	0	0	0	0	0	0	0	0	0
Solyc00g005460.1.1	0.0848636	0.122409	0.048755	0	0.154915	0.0508513	0	0.118674	0.233195	0.186372
Solyc00g005470.1.1	0	0	0	0	0	0	0	0	0	0
Solyc00g005480.1.1	0	0	0	0	0	0	0	0	0	0
Solyc00g005490.1.1	0	0	0	0	0	0	0	0	0	0
Solyc00g005840.2.1	19.0094	16.8517	18.2344	18.5667	16.7308	16.4758	17.9728	17.5044	18.0026	16.0746
Solyc00g005850.1.1	0	0	0	0	0	0	0	0	0.046639	0.0931862
Solyc00g005860.1.1	0	0.0408031	0	0	0.103276	0	0	0	0.046639	0
Solyc00g005870.1.1	0.127295	0	0.146265	0.0458437	0	0.0508513	0	0.0593369	0	0
Solyc00g005880.1.1	0.0424318	0	0.048755	0	0	0	0	0	0.046639	0.0465931
Solyc00g005890.2.1	0	0	0	0	0	0	0	0	0	0
Solyc00g005900.1.1	0	0	0	0	0	0	0	0	0	0
Solyc00g005980.1.1	0	0	0	0	0	0	0	0	0	0
Solyc00g006010.1.1	0	0	0	0	0	0	0	0	0	0
Solyc00g006020.1.1	0	0	0	0	0	0	0	0	0	0
Solyc00g006050.1.1	0	0	0	0.0458437	0	0.101703	0.067567	0	0	0
Solyc00g006090.1.1	0	0	0	0	0	0	0	0	0	0
Solyc00g006170.1.1	0	0	0	0	0	0	0	0	0	0
Solyc00g006250.1.1	0	0	0	0	0	0	0	0	0	0
Solyc00g006470.1.1	187.039	187.286	109.553	120.019	101.108	103.432	134.053	129.592	202.273	207.526
Solyc00g006480.1.1	0	0	0	0	0	0	0	0	0	0
Solyc00g006490.2.1	88.3854	85.401	91.3182	85.2234	99.8166	96.414	79.2561	75.4766	72.6169	73.1977
Solyc00g006500.1.1	0	0	0	0	0	0	0	0	0	0
Solyc00g006510.1.1	0	0	0	0	0	0	0	0	0	0
Solyc00g006520.1.1	0	0	0	0	0	0	0	0	0	0
Solyc00g006530.1.1	0	0	0	0	0	0	0	0	0	0
Solyc00g006540.1.1	0	0	0	0	0	0	0	0	0	0
Solyc00g006550.1.1	0	0	0	0	0	0	0	0	0	0
Solyc00g006560.1.1	0	0	0	0	0	0	0	0	0	0
Solyc00g006570.1.1	0.254591	0.122409	0.29253	0.229218	0.309829	0.305108	0.270268	0.237348	0.139917	0.139779
Solyc00g006590.1.1	0	0	0	0	0	0	0	0	0	0
Solyc00g006600.1.1	0	0	0	0.0458437	0	0	0	0	0	0
Solyc00g006630.1.1	0	0	0	0	0	0	0	0	0	0
Solyc00g006650.1.1	0	0	0	0	0	0	0	0	0	0
Solyc00g006660.1.1	0	0	0	0	0	0	0	0	0	0
Solyc00g006670.2.1	0.0424318	0.0408031	0.048755	0	0	0.203405	0.067567	0.0593369	0.046639	0.0465931
Solyc00g006680.1.1	0.339454	0.816063	0.48755	0.50428	0.309829	0.457662	0.472969	0.712043	0.792863	0.698896
Solyc00g006690.2.1	180.717	197.446	128.128	116.672	70.5894	64.0218	114.188	105.62	178.534	201.003
Solyc00g006700.1.1	0	0	0	0	0	0	0	0	0	0
Solyc00g006800.2.1	149.36	147.177	152.213	150.688	137.822	141.061	145.337	144.426	137.305	140.059
Solyc00g006810.2.1	10.6504	10.2416	10.5798	10.5899	9.08832	9.86515	10.5404	9.79059	10.2139	9.59818
Solyc00g006820.2.1	62.8415	64.4689	61.2363	58.7716	46.8358	44.7491	48.0401	45.8081	38.8503	39.045
Solyc00g006830.2.1	79.2201	81.3206	81.7134	81.6017	87.9914	82.5825	79.0534	81.7663	77.0476	74.8751
Solyc00g006840.2.1	0	0	0	0	0	0	0	0	0	0
Solyc00g006850.1.1	0	0	0	0	0	0	0	0	0	0
Solyc00g006860.1.1	0	0	0	0	0	0	0	0	0	0
Solyc00g006870.1.1	0	0	0	0	0	0	0	0	0	0
Solyc00g006880.1.1	0	0	0	0	0	0	0	0	0	0
Solyc00g006890.1.1	0	0	0	0	0	0	0	0	0	0
Solyc00g006900.1.1	0.0424318	0.0408031	0.048755	0.0458437	0.0516382	0	0	0	0.093278	0
Solyc00g007000.1.1	0.551613	0.367228	0.341285	0.229218	0.464744	0.355959	0.067567	0	0.046639	0.139779
Solyc00g007010.2.1	32.1209	35.0907	32.2758	33.0991	27.265	27.2054	33.7159	34.3561	32.5074	30.9844
Solyc00g007020.1.1	0	0	0	0	0	0	0	0	0	0
Solyc00g007030.1.1	0.0424318	0	0	0	0	0	0	0	0	0
Solyc00g007040.1.1	0	0	0	0	0	0	0	0	0	0
Solyc00g007050.1.1	0	0	0	0	0	0	0	0	0	0
Solyc00g007060.2.1	16.1665	18.2798	17.3568	16.0911	16.7308	14.9503	11.6215	12.4608	11.1934	10.3437
Solyc00g007070.2.1	140.831	143.015	143.925	131.892	142.057	139.383	129.256	124.014	124.759	128.55
Solyc00g007080.2.1	10.3958	9.46633	10.9211	10.1773	11.3604	9.61089	11.9594	12.6981	12.4992	12.7665
Solyc00g007090.2.1	13.069	12.0369	12.4813	12.6529	14.0456	13.1705	12.8377	12.8761	14.3182	13.8847
Solyc00g007100.2.1	17.1424	15.8316	17.4543	16.1828	15.4398	14.7469	19.3242	17.6231	18.9354	19.2895
Solyc00g007110.2.1	10.2685	9.22151	10.3848	10.5899	10.1727	11.5941	7.49993	9.9686	9.23452	10.2971
Solyc00g007120.2.1	24.9923	22.7681	26.9615	27.277	26.3871	26.341	27.0268	25.0995	25.2317	25.3466
Solyc00g007130.2.1	1.52754	1.50972	1.85269	1.467	1.39423	1.52554	1.55404	1.48342	1.49245	1.16483
Solyc00g007140.1.1	0	0	0	0	0	0	0	0	0	0
Solyc00g007150.2.1	0	0	0	0	0	0	0	0	0	0
Solyc00g007160.1.1	0	0	0	0	0	0	0	0	0	0
Solyc00g007170.1.1	0	0	0	0	0	0	0	0	0	0
Solyc00g007180.1.1	0	0	0	0	0	0	0	0	0	0
Solyc00g007190.2.1	2.20645	1.3057	1.85269	1.97128	2.06553	1.57639	2.09458	2.07679	1.16597	1.39779
Solyc00g007200.2.1	28.599	28.1134	30.2281	27.1853	26.9035	27.5105	20.4052	20.1152	20.3812	19.1032
Solyc00g007210.1.1	0	0	0	0	0	0	0	0	0	0
Solyc00g007220.2.1	5.68586	5.2636	6.92321	6.41811	8.15883	8.64472	7.9729	8.06982	6.71601	6.56963
Solyc00g007230.1.1	0	0	0.048755	0	0	0	0.067567	0	0	0
Solyc00g007240.1.1	0	0	0	0	0	0	0	0	0	0
Solyc00g007250.1.1	0	0.0408031	0.048755	0	0	0	0	0	0	0
Solyc00g007260.2.1	244.619	250.531	227.052	220.967	236.245	227.254	139.12	143.299	148.732	147.188
Solyc00g007270.2.1	81.7236	78.3828	80.397	75.5045	62.8953	60.5639	88.7154	86.8099	92.7649	91.8816
Solyc00g007290.1.1	0	0	0	0	0	0	0	0	0	0
Solyc00g007300.2.1	7.97717	8.52785	9.45848	10.1773	7.64245	6.71237	7.63507	8.01049	6.5761	6.56963
Solyc00g007310.1.1	0	0	0	0	0	0	0	0	0	0
Solyc00g007320.1.1	0	0	0	0	0	0	0	0	0	0
Solyc00g007330.1.1	0	0	0	0	0	0	0	0	0	0
Solyc00g007340.1.1	0	0	0	0	0	0	0	0	0	0
Solyc00g007350.1.1	0	0	0	0	0	0	0	0	0	0
Solyc00g007450.1.1	0	0	0	0	0	0	0	0	0	0
Solyc00g007550.1.1	0	0	0	0	0	0	0	0	0	0
Solyc00g007560.1.1	0	0	0	0	0	0	0	0	0	0
Solyc00g007570.1.1	0	0	0	0	0	0	0	0	0	0
Solyc00g007580.1.1	0	0	0	0	0	0	0	0	0	0
Solyc00g007590.1.1	0	0	0	0	0	0	0	0	0	0
Solyc00g007600.1.1	0.0424318	0.0816063	0	0.0458437	0.103276	0	0.067567	0	0.046639	0.0931862
Solyc00g007610.1.1	0	0	0	0	0	0	0	0	0	0
Solyc00g007910.1.1	0.0424318	0	0	0	0	0	0	0	0	0
Solyc00g007920.1.1	0	0	0	0	0	0	0	0	0	0
Solyc00g007930.1.1	0	0	0	0	0	0	0	0	0	0
Solyc00g007940.1.1	0	0	0	0	0	0	0	0	0	0
Solyc00g007950.1.1	0	0	0	0	0	0	0	0	0	0
Solyc00g007960.1.1	0	0	0	0	0	0	0	0	0	0
Solyc00g007970.1.1	0	0	0	0	0	0	0	0	0	0
Solyc00g007980.1.1	0	0	0	0	0	0	0	0	0	0
Solyc00g007990.1.1	0	0	0	0	0	0	0	0	0	0
Solyc00g008000.1.1	0	0	0	0	0	0	0	0	0	0
Solyc00g008010.1.1	0	0	0	0	0	0	0	0	0	0
Solyc00g008020.1.1	0	0	0	0	0	0	0	0	0	0
Solyc00g008030.1.1	0	0	0	0	0	0	0	0	0	0
Solyc00g008040.1.1	0	0	0	0	0	0	0	0	0	0
Solyc00g008050.1.1	0	0	0	0	0	0	0	0	0	0
Solyc00g008060.1.1	0	0	0	0	0	0	0	0	0	0
Solyc00g008070.1.1	0	0	0	0	0	0	0	0	0	0
Solyc00g008080.1.1	0	0	0	0	0	0	0	0	0	0
Solyc00g008090.1.1	0	0	0	0	0	0	0	0	0	0
Solyc00g008100.1.1	0	0	0	0	0	0	0	0	0	0
Solyc00g008110.1.1	0	0	0	0	0	0	0	0	0	0
Solyc00g008120.1.1	0	0	0	0	0	0	0	0	0	0
Solyc00g008130.1.1	0	0	0	0	0	0	0	0	0	0
Solyc00g008140.1.1	0	0	0	0	0	0	0	0	0	0
Solyc00g008150.1.1	0	0	0	0	0	0	0	0	0	0
Solyc00g008160.1.1	0	0	0	0	0	0	0	0	0	0
Solyc00g008260.1.1	0	0	0	0	0	0	0	0	0	0
Solyc00g008270.1.1	0	0	0	0	0	0	0	0	0	0
Solyc00g008570.2.1	10.2685	12.9346	7.60579	7.83927	2.99501	2.03405	6.48643	7.41712	9.00132	8.01401
Solyc00g008580.1.1	9.80174	9.54793	5.3143	6.46396	43.7892	44.444	29.7295	30.5585	48.5045	52.9763
Solyc00g008680.2.1	127.465	126.939	119.937	119.744	90.2635	92.6002	111.891	110.782	105.357	103.064
Solyc00g008690.1.1	0	0	0.048755	0	0.0516382	0	0	0	0	0
Solyc00g008800.1.1	0	0	0	0	0	0	0	0	0	0
Solyc00g008900.1.1	0	0	0	0	0	0	0	0	0	0
Solyc00g008910.1.1	0	0	0	0	0	0	0	0	0	0
Solyc00g008920.1.1	0	0	0	0	0	0	0	0	0	0
Solyc00g009020.2.1	168.157	167.456	144.071	137.623	131.781	130.484	182.701	180.266	178.487	178.079
Solyc00g009030.1.1	0.678908	0.775259	0.877591	0.641811	0.671296	0.661067	0.743237	0.652706	1.0727	0.698896
Solyc00g009040.2.1	4.07345	4.03951	4.38795	5.08865	5.11218	6.81407	6.7567	6.88308	7.83535	8.38676
Solyc00g009050.1.1	16.7181	15.954	17.8443	17.1455	16.1627	16.9843	19.1215	19.1658	16.5568	16.6337
Solyc00g009060.2.1	12.0082	11.8737	7.2645	7.01408	7.53917	6.81407	5.27022	7.17977	6.06307	6.19688
Solyc00g009070.1.1	0	0	0	0	0	0	0	0.0593369	0	0.0465931
Solyc00g009080.2.1	10.3958	11.3841	9.6535	9.94808	8.36538	6.76322	10.6756	10.6213	11.1001	11.8346
Solyc00g009090.2.1	46.1233	48.3109	43.2457	41.0301	42.2917	39.308	35.8781	32.9913	37.9641	38.2995
Solyc00g009100.2.1	11.7536	10.8536	12.5788	10.1315	9.03668	10.7805	10.2702	12.2827	9.88747	10.4834
Solyc00g009110.2.1	12.5174	12.2817	15.8941	15.4493	40.4843	41.6472	11.4188	10.0873	8.34838	7.64127
Solyc00g009120.2.1	3.43697	3.38666	2.48651	2.70478	2.27208	1.8815	1.95944	1.36475	1.49245	2.14328
Solyc00g009130.2.1	1.69727	2.08096	1.80394	1.69622	1.13604	1.67809	1.55404	1.54276	0.93278	1.02505
Solyc00g009140.2.1	2.8005	3.06023	3.26659	3.71334	2.73682	1.9832	2.29728	2.7295	1.53909	2.0501
Solyc00g009240.1.1	0	0	0	0	0	0	0	0	0	0
Solyc00g009440.1.1	0	0	0	0	0	0	0	0	0	0
Solyc00g009540.1.1	0	0.0408031	0	0.0458437	0.103276	0.0508513	0	0.0593369	0.046639	0
Solyc00g009650.1.1	0	0	0	0	0	0	0	0	0	0
Solyc00g009660.1.1	0	0	0	0	0	0	0	0	0	0
Solyc00g009760.2.1	29.2355	33.6626	20.1358	26.6352	12.2382	12.3569	20.4728	16.6143	38.7104	39.4178
Solyc00g009770.1.1	0	0	0	0	0	0	0.067567	0.0593369	0	0.0931862
Solyc00g009780.1.1	0.891067	0.897669	1.07261	0.641811	1.0844	2.33916	1.89188	2.31414	1.77228	2.0035
Solyc00g009790.1.1	0	0	0	0	0	0	0	0	0	0
Solyc00g009800.1.1	1.31539	1.50972	1.21888	1.55868	0.722934	2.54256	1.68917	3.14486	2.19203	2.51603
Solyc00g010100.1.1	0	0	0	0	0	0	0	0	0	0
Solyc00g010110.1.1	0	0	0	0	0	0	0	0	0	0
Solyc00g010210.1.1	0	0	0	0	0	0	0	0	0	0
Solyc00g010410.1.1	0	0	0	0	0	0	0	0	0	0
Solyc00g010420.1.1	0	0	0	0	0	0	0	0	0	0
Solyc00g010520.1.1	0	0	0	0	0	0	0	0	0	0
Solyc00g010530.1.1	2.54591	2.69301	0.828836	0.733499	2.01389	1.47469	1.55404	1.6021	1.72564	1.3512
Solyc00g010540.1.1	0	0	0	0	0	0	0	0	0	0
Solyc00g010550.1.1	0.46675	0.693653	0.68257	0.320906	0.464744	0.559364	0.67567	0.474695	0.699585	0.512524
Solyc00g010750.1.1	0	0	0	0.0458437	0	0	0	0	0	0
Solyc00g010760.1.1	0	0	0	0	0	0	0	0	0	0
Solyc00g010770.1.1	0	0	0	0	0	0	0.067567	0	0	0
Solyc00g010780.1.1	0	0	0	0	0	0	0	0	0	0
Solyc00g010790.1.1	0	0	0	0	0	0	0	0	0	0
Solyc00g010810.1.1	0	0	0	0	0	0	0	0	0	0
Solyc00g010930.1.1	0	0	0	0	0	0	0	0	0	0
Solyc00g011130.1.1	0	0	0	0	0	0	0	0	0	0
Solyc00g011140.1.1	0	0	0	0	0	0	0	0	0	0
Solyc00g011150.1.1	67.9333	66.0603	34.8111	38.7837	30.8796	31.4769	41.4186	40.3491	58.7651	59.9187
Solyc00g011160.1.1	4.87965	5.2228	3.02281	2.84231	4.90563	6.00045	4.79726	4.03491	10.5871	7.73445
Solyc00g011170.1.1	0.169727	0.0816063	0.048755	0.275062	0.103276	0.0508513	0.608103	0.118674	0.139917	0.0465931
Solyc00g011180.1.1	0	0	0	0	0	0	0	0	0	0
Solyc00g011310.1.1	0	0	0	0	0	0	0	0	0	0
Solyc00g011550.1.1	0	0	0	0	0	0	0	0	0	0
Solyc00g011560.1.1	0	0	0	0	0	0	0	0	0	0
Solyc00g011660.1.1	0	0	0	0	0	0	0	0	0	0
Solyc00g011670.1.1	0	0	0	0	0	0	0	0	0	0
Solyc00g011870.1.1	0	0	0	0	0	0	0	0	0	0
Solyc00g011880.2.1	5.26154	4.52915	5.26554	4.81359	4.75071	3.76299	5.33779	5.69635	4.6639	5.35821
Solyc00g011890.2.1	76.7591	74.0577	76.6917	78.2093	92.0192	95.0919	86.8236	92.8623	80.8254	79.348
Solyc00g012090.1.1	0	0	0	0	0	0	0	0	0	0
Solyc00g012310.1.1	0	0	0	0	0	0	0	0	0	0
Solyc00g012430.1.1	0.891067	0.65285	0.29253	0.0916873	1.03276	0.864472	0.878371	0.77138	0.606307	1.16483
Solyc00g012440.1.1	3.94616	4.52915	2.48651	2.24634	2.01389	2.59342	1.95944	1.83944	4.33743	4.23997
Solyc00g012540.1.1	0	0	0	0	0	0	0	0	0	0
Solyc00g012640.1.1	0	0	0	0	0	0	0	0	0	0
Solyc00g012650.1.1	0	0	0	0	0	0	0	0	0	0
Solyc00g012660.1.1	0	0	0	0	0	0	0	0	0	0
Solyc00g012670.1.1	0	0	0	0	0	0	0	0	0	0
Solyc00g012680.1.1	0	0	0	0	0	0	0	0	0	0
Solyc00g012690.1.1	0	0	0	0	0	0	0	0	0	0
Solyc00g012700.1.1	0	0	0	0	0	0	0	0	0	0
Solyc00g012800.1.1	0	0	0	0	0	0	0	0	0	0
Solyc00g012900.1.1	0	0	0	0	0	0	0	0	0	0
Solyc00g013000.1.1	0	0	0	0	0	0	0	0	0	0
Solyc00g013100.1.1	0.0424318	0.0816063	0	0	0.206553	0	0	0	0.139917	0.0931862
Solyc00g013110.1.1	0.0848636	0.122409	0.048755	0.137531	0.0516382	0.0508513	0.270268	0.0593369	0.186556	0.0931862
Solyc00g013120.2.1	3.01266	2.89702	2.63277	3.71334	3.2532	2.79682	3.85132	3.73823	3.21809	2.98196
Solyc00g013130.2.1	0.0848636	0	0	0	0	0	0	0	0	0
Solyc00g013140.1.1	7.00124	6.36529	5.65558	6.23474	7.07443	7.06833	6.82426	6.76441	6.85593	7.4083
Solyc00g013150.1.1	1.14566	0.979275	0.48755	0.825186	0.981125	0.508513	1.08107	0.712043	0.559668	0.698896
Solyc00g013160.1.1	1.867	2.28498	3.02281	3.20906	3.56303	3.25448	3.31078	4.56894	2.7517	3.82063
Solyc00g013170.1.1	1.61241	2.85622	3.75414	3.66749	2.27208	3.50874	3.37835	3.44154	2.65842	2.42284
Solyc00g013180.1.1	0.975931	0.489638	0.58506	0.50428	1.03276	0.559364	0.743237	1.24608	1.16597	0.931862
Solyc00g013190.1.1	0.339454	0.0408031	0.438795	0.320906	0.361467	0.40681	0.405402	0.593369	0.373112	0.512524
Solyc00g013320.1.1	0	0	0	0	0	0	0	0	0	0
Solyc00g013330.1.1	0	0	0	0	0	0	0	0	0	0
Solyc00g013770.1.1	0	0	0	0	0	0	0	0	0	0
Solyc00g014170.1.1	0	0	0	0	0	0	0	0	0	0
Solyc00g014180.1.1	0	0	0	0	0	0	0	0	0	0
Solyc00g014190.1.1	0	0	0	0	0	0	0	0	0	0
Solyc00g014290.1.1	0	0	0	0	0	0	0	0	0	0
Solyc00g014390.1.1	0	0	0	0	0	0	0	0	0	0
Solyc00g014790.2.1	0.72134	0.65285	0.438795	0.458437	0.516382	0.457662	0.472969	0.474695	0.839502	0.698896
Solyc00g014800.1.1	0.551613	0.530441	0.48755	0.366749	0.413105	0.40681	0.810804	1.1274	0.419751	0.745489
Solyc00g014810.1.1	0.46675	0.571244	0.438795	0.320906	0.309829	0.559364	0.540536	0.77138	0.559668	0.652303
Solyc00g014820.2.1	1.14566	1.06088	1.12137	1.0544	0.774573	0.915323	1.08107	1.1274	1.11934	0.838676
Solyc00g014830.2.1	1.14566	2.16257	1.65767	1.65037	2.1688	2.18661	1.89188	1.83944	2.61178	2.42284
Solyc00g014840.1.1	0.636477	0.775259	0.29253	0.595968	0.722934	1.16958	1.08107	0.830717	0.699585	0.792083
Solyc00g014850.1.1	0.424318	0.448834	0.39004	0.366749	0.774573	0.254256	0.472969	0.415359	1.21261	0.792083
Solyc00g014860.1.1	0	0.122409	0	0.0458437	0	0	0.067567	0	0	0.0465931
Solyc00g014960.1.1	0	0	0	0	0	0	0	0	0	0
Solyc00g014970.1.1	0	0	0	0	0	0	0	0	0	0
Solyc00g014980.1.1	0	0	0	0	0	0	0	0	0	0
Solyc00g014990.1.1	0	0	0	0	0	0	0	0	0	0
Solyc00g015000.1.1	0	0	0	0	0	0	0	0	0	0
Solyc00g015600.1.1	0	0	0	0	0	0	0	0	0	0
Solyc00g015610.1.1	0	0	0	0	0	0	0	0	0	0
Solyc00g015720.1.1	0	0	0	0	0	0	0	0	0	0
Solyc00g015730.1.1	0	0	0	0	0	0	0	0	0	0
Solyc00g015740.1.1	0	0	0	0	0	0	0	0	0	0
Solyc00g015750.1.1	0	0	0	0	0	0	0	0	0	0
Solyc00g015760.1.1	0	0	0	0.0458437	0	0	0	0	0	0
Solyc00g015770.1.1	0	0	0	0	0	0	0	0	0	0
Solyc00g016470.1.1	0	0	0	0	0	0	0	0	0	0
Solyc00g016480.1.1	0	0	0	0	0	0	0	0	0	0
Solyc00g016490.1.1	0	0	0	0	0	0	0	0	0	0
Solyc00g016590.1.1	0	0	0	0	0	0	0	0	0	0
Solyc00g016790.1.1	0	0	0	0	0	0	0	0	0	0
Solyc00g016890.1.1	0	0	0	0	0	0	0	0	0	0
Solyc00g016900.1.1	0	0	0	0	0	0	0	0	0	0
Solyc00g016910.1.1	0	0	0	0	0	0	0	0	0	0
Solyc00g017210.1.1	0	0.0408031	0	0	0	0	0	0	0	0
Solyc00g017220.1.1	0	0	0	0	0	0	0	0	0	0
Solyc00g017230.1.1	0	0	0	0	0	0	0	0	0	0
Solyc00g017530.1.1	0	0	0	0	0	0	0	0	0	0
Solyc00g017540.1.1	0.0424318	0	0	0	0	0	0	0	0	0
Solyc00g017550.1.1	0	0.0408031	0	0.0458437	0	0.0508513	0	0	0	0.0465931
Solyc00g017750.1.1	0	0	0	0	0	0	0	0	0	0
Solyc00g017760.1.1	0	0	0	0	0	0	0	0	0	0
Solyc00g017860.1.1	0	0	0	0	0	0	0	0	0	0
Solyc00g017870.1.1	0	0	0	0	0	0	0	0	0	0
Solyc00g017880.1.1	0	0	0	0	0	0	0	0	0	0
Solyc00g017890.1.1	0	0	0	0	0	0	0	0	0	0
Solyc00g017900.1.1	0	0	0	0	0	0	0	0	0	0
Solyc00g017910.1.1	0	0	0	0	0	0	0	0	0	0
Solyc00g017920.1.1	0	0	0	0	0	0	0	0	0	0
Solyc00g017930.1.1	0	0	0	0	0	0	0	0	0	0
Solyc00g018760.1.1	0	0	0	0	0	0	0	0	0	0
Solyc00g018770.1.1	0	0	0	0	0	0	0	0	0	0
Solyc00g018970.1.1	0	0	0	0	0	0	0	0	0	0
Solyc00g019610.1.1	0	0	0	0	0	0	0	0	0	0
Solyc00g019620.1.1	0	0	0	0	0	0	0	0	0	0
Solyc00g019630.1.1	0	0	0	0	0	0	0	0	0	0
Solyc00g019730.1.1	2.29132	2.81542	2.43775	2.24634	2.53027	3.50874	1.89188	1.83944	3.49792	2.37625
Solyc00g019740.1.1	1.18809	1.2649	1.56016	1.65037	1.70406	1.16958	1.0135	1.06806	2.09875	1.63076
Solyc00g019750.1.1	1.01836	0.775259	0.438795	0.595968	0.309829	0.305108	0.405402	0.296685	0.559668	0.372745
Solyc00g019950.1.1	0.339454	0.244819	0.243775	0.183375	0.309829	0.101703	0.608103	0.296685	0.233195	0.326152
Solyc00g019960.1.1	0.0848636	0.122409	0.146265	0.183375	0.206553	0.254256	0.202701	0.296685	0.419751	0.186372
Solyc00g019970.2.1	0.169727	0.204016	0.29253	0.275062	0.361467	0.305108	0.878371	0.474695	0.513029	0.60571
Solyc00g019980.2.1	0.763772	0.693653	0.438795	0.779342	0.671296	0.508513	2.43241	1.89878	1.39917	0.792083
Solyc00g019990.1.1	0.339454	0.122409	0.0975101	0.0916873	0.258191	0.152554	0.135134	0.237348	0.419751	0.465931
Solyc00g020000.1.1	13.4933	15.138	10.6774	11.4151	9.65634	10.5262	18.4458	19.2252	15.1577	17.0531
Solyc00g020010.1.1	9.46229	8.20143	6.77695	7.42668	5.47365	5.13598	10.8107	10.384	9.46771	9.87774
Solyc00g020020.2.1	1.31539	1.3057	1.56016	1.74206	1.0844	1.37298	3.04051	3.08552	2.23867	2.79559
Solyc00g020030.1.1	0.0424318	0.0816063	0	0	0	0.0508513	0.608103	0.356022	0.233195	0.186372
Solyc00g020040.1.1	0.127295	0.326425	0.146265	0	0.103276	0.101703	0.270268	0.118674	0.093278	0.232965
Solyc00g020440.1.1	0	0	0	0.0458437	0	0	0	0	0	0
Solyc00g020540.1.1	0	0	0	0	0	0	0	0	0	0
Solyc00g020840.2.1	0.169727	0.244819	0.19502	0.183375	0.258191	0.101703	0	0.118674	0	0.0931862
Solyc00g020940.1.1	0	0	0	0	0	0	0	0	0	0
Solyc00g020950.1.1	0	0	0	0	0	0	0	0	0	0
Solyc00g020960.1.1	0	0	0	0	0	0	0	0	0	0
Solyc00g020970.1.1	0	0	0	0	0	0	0	0	0	0
Solyc00g020980.1.1	0	0	0	0	0	0	0	0	0	0
Solyc00g020990.1.1	0	0	0	0	0	0	0	0	0	0
Solyc00g021490.1.1	0	0	0	0	0	0	0	0	0	0
Solyc00g021500.1.1	0	0	0	0	0	0	0	0	0	0
Solyc00g021510.1.1	0	0	0	0	0	0	0	0	0	0
Solyc00g021520.1.1	0	0	0	0	0	0	0	0	0	0
Solyc00g021530.1.1	0	0	0	0	0	0	0	0	0	0
Solyc00g021630.1.1	1.18809	1.22409	1.12137	1.14609	1.60078	1.32213	0.810804	1.18674	0.979419	1.21142
Solyc00g021640.2.1	1.01836	1.02008	1.02386	0.458437	0.619658	1.37298	1.75674	2.07679	1.53909	1.58417
Solyc00g021650.1.1	0	0	0	0	0	0.0508513	0.067567	0.0593369	0.046639	0.0465931
Solyc00g021660.1.1	0	0.0408031	0	0	0	0	0	0	0	0
Solyc00g022070.1.1	0.0424318	0.0816063	0	0.0458437	0	0.101703	0.067567	0.0593369	0.046639	0.0931862
Solyc00g022080.1.1	0	0.0408031	0.048755	0	0	0	0	0	0	0.0465931
Solyc00g022090.1.1	0.127295	0	0.146265	0.0458437	0.103276	0.101703	0.135134	0.118674	0.139917	0.0465931
Solyc00g022100.1.1	0.339454	0.285622	0.19502	0.275062	0.309829	0.40681	0.743237	0.237348	0.606307	0.419338
Solyc00g022110.2.1	1.95186	1.83614	2.09647	1.65037	2.27208	2.0849	2.16214	2.43281	3.07817	3.02855
Solyc00g022920.1.1	0	0	0	0	0	0	0	0	0	0
Solyc00g023020.1.1	0	0	0	0.0458437	0	0	0	0	0	0
Solyc00g023030.1.1	0	0	0	0	0	0	0	0	0	0
Solyc00g023040.1.1	0	0	0	0	0	0	0	0	0	0
Solyc00g023050.1.1	0	0	0	0	0	0	0	0	0	0
Solyc00g023250.1.1	0	0	0	0	0	0	0	0	0	0
Solyc00g023260.1.1	0	0	0	0	0	0	0	0	0	0
Solyc00g023270.1.1	0	0	0.048755	0	0	0	0	0	0	0
Solyc00g023470.1.1	0	0	0	0	0	0	0	0	0	0
Solyc00g023570.1.1	0.0848636	0	0.048755	0	0	0	0.270268	0.0593369	0.186556	0.0465931
Solyc00g023580.1.1	0	0	0.048755	0.0458437	0	0	0.135134	0.178011	0.046639	0.0931862
Solyc00g023590.2.1	0.297022	0.163213	0.146265	0.137531	0.413105	0.355959	0.472969	0.237348	0.326473	0.139779
Solyc00g023600.1.1	0.975931	0.693653	0.68257	0.916873	1.70406	0.762769	0.878371	1.00873	0.559668	0.698896
Solyc00g023700.2.1	0	0	0.048755	0.0458437	0	0	0.135134	0	0.093278	0.0465931
Solyc00g023710.1.1	0	0	0	0.0458437	0	0	0	0.0593369	0.093278	0
Solyc00g024010.1.1	0	0	0	0	0	0	0	0	0	0
Solyc00g024020.1.1	0	0	0	0	0	0	0	0	0	0
Solyc00g024030.1.1	0	0	0	0	0	0	0	0	0	0
Solyc00g024040.1.1	0	0	0	0	0	0	0	0	0	0
Solyc00g024050.1.1	0	0	0	0	0	0	0	0	0	0
Solyc00g024150.2.1	11.2869	11.0576	9.2147	10.865	8.36538	7.8311	12.3648	12.8761	11.24	12.0676
Solyc00g024160.1.1	0.0424318	0	0.048755	0.0458437	0	0	0.067567	0.178011	0.046639	0.0465931
Solyc00g024170.1.1	0	0	0	0	0.0516382	0	0	0.118674	0.046639	0
Solyc00g024370.1.1	0	0	0	0	0	0	0	0	0	0
Solyc00g024570.1.1	0	0	0	0	0	0	0	0	0	0
Solyc00g024670.1.1	0	0	0	0	0	0	0	0	0	0
Solyc00g024680.1.1	0	0	0	0	0	0	0	0	0	0
Solyc00g024690.1.1	0	0	0	0	0	0	0	0	0	0
Solyc00g025290.1.1	5.51613	5.42682	5.26554	5.63877	7.07443	7.78025	8.78371	7.77314	7.08913	8.47994
Solyc00g025300.1.1	0.0424318	0.0408031	0.048755	0.0916873	0	0.0508513	0	0.0593369	0	0.139779
Solyc00g025400.2.1	0.0848636	0.0408031	0.048755	0.0458437	0.154915	0.152554	0.472969	0.296685	0.233195	0.186372
Solyc00g025500.1.1	0	0	0	0	0	0	0	0	0	0
Solyc00g025510.1.1	0	0	0	0	0	0	0	0	0	0
Solyc00g025520.1.1	0	0	0	0	0	0	0	0	0	0
Solyc00g025530.1.1	0	0	0	0	0	0	0	0	0	0
Solyc00g025540.1.1	0	0	0	0	0	0	0	0	0	0
Solyc00g025650.1.1	0	0	0	0	0	0	0	0	0	0
Solyc00g025660.1.1	0	0	0	0	0	0	0	0	0	0
Solyc00g026160.2.1	0.806204	1.06088	1.60892	1.28362	0.929487	1.06788	1.75674	1.54276	0.979419	1.11823
Solyc00g026860.1.1	0	0	0	0	0	0	0	0	0	0
Solyc00g026870.1.1	0	0	0	0	0	0	0	0	0	0
Solyc00g026880.1.1	0	0	0	0	0	0	0	0	0	0
Solyc00g026890.1.1	0	0	0	0	0	0	0	0	0	0
Solyc00g026900.1.1	0	0	0	0	0	0	0	0	0	0
Solyc00g027120.1.1	0	0	0	0	0	0	0	0	0	0
Solyc00g027130.1.1	0	0	0	0	0	0	0	0	0	0
Solyc00g027140.1.1	0	0	0	0	0	0	0	0	0	0
Solyc00g027640.1.1	0	0	0	0	0	0	0	0	0	0
Solyc00g027650.1.1	0	0	0	0	0	0	0	0	0	0
Solyc00g027660.1.1	0	0	0	0	0	0	0	0	0	0
Solyc00g027670.1.1	0	0	0	0	0	0	0	0	0	0
Solyc00g027770.2.1	31.9511	31.3776	29.8868	30.9445	41.5171	39.1046	29.9322	29.2531	28.2166	29.8662
Solyc00g027870.1.1	0	0	0	0	0	0	0	0	0	0
Solyc00g027970.1.1	0	0	0	0	0	0	0.067567	0	0	0
Solyc00g027980.1.1	0	0	0	0	0	0	0	0	0	0
Solyc00g027990.1.1	0	0	0	0	0	0	0	0	0	0
Solyc00g028090.1.1	0	0	0	0	0	0	0	0	0	0
Solyc00g028100.1.1	0	0	0	0	0	0	0	0	0	0
Solyc00g028110.1.1	0	0	0	0	0	0	0	0	0	0
Solyc00g028120.1.1	0	0	0	0	0	0	0	0	0	0
Solyc00g028420.1.1	0	0	0	0	0	0	0	0	0	0
Solyc00g028520.1.1	0	0	0	0	0	0	0	0	0	0
Solyc00g028530.1.1	0	0	0	0	0	0	0	0	0	0
Solyc00g028540.1.1	0	0	0	0	0	0	0	0	0	0
Solyc00g028550.1.1	0	0	0	0	0	0	0	0	0	0
Solyc00g028560.1.1	0	0	0	0	0	0	0	0	0	0
Solyc00g028760.1.1	0	0	0	0	0	0	0	0	0	0
Solyc00g028960.1.1	0	0	0	0	0	0	0	0	0	0
Solyc00g029060.1.1	0	0	0	0	0	0	0	0	0	0
Solyc00g029070.1.1	0	0	0	0	0	0	0	0	0	0
Solyc00g029080.1.1	0	0	0	0	0	0	0	0	0	0
Solyc00g029090.1.1	0	0	0	0	0	0	0	0	0	0
Solyc00g029190.2.1	0.0848636	0.122409	0.146265	0	0	0.0508513	0	0	0	0.0465931
Solyc00g029290.1.1	0	0	0	0	0	0	0	0	0	0
Solyc00g029300.1.1	0	0	0	0	0	0	0	0	0	0
Solyc00g029500.1.1	0	0	0	0	0	0	0	0	0	0
Solyc00g029800.1.1	0	0	0	0	0	0	0	0	0	0
Solyc00g030000.1.1	0	0	0	0	0	0	0	0	0	0
Solyc00g030100.1.1	1.78213	1.67293	1.36514	1.65037	2.1688	2.03405	3.17565	1.89878	1.77228	2.60921
Solyc00g030110.1.1	0	0	0	0	0	0	0	0	0	0
Solyc00g030210.1.1	0	0	0	0	0	0	0	0	0	0
Solyc00g030510.2.1	0	0.0408031	0	0	0	0	0	0	0	0
Solyc00g030520.2.1	11.6263	12.3633	10.4823	10.7733	8.77849	10.933	12.4323	12.6388	12.0329	11.5085
Solyc00g030820.1.1	0.0424318	0	0.048755	0	0	0.0508513	0	0	0	0
Solyc00g031020.1.1	0	0	0	0	0	0	0	0	0	0
Solyc00g031030.1.1	0	0	0	0	0	0	0	0	0	0
Solyc00g031040.1.1	0.0424318	0.0408031	0	0	0.0516382	0.0508513	0.067567	0.0593369	0.093278	0.0465931
Solyc00g031050.1.1	0	0	0	0	0	0	0	0	0	0
Solyc00g031060.1.1	0	0	0	0	0	0	0	0	0	0
Solyc00g031360.1.1	0	0	0	0	0	0	0	0	0	0
Solyc00g031370.1.1	0	0	0	0	0	0	0	0	0	0
Solyc00g031380.1.1	0	0	0	0	0	0	0	0	0	0
Solyc00g031390.1.1	0	0	0	0	0	0	0	0	0	0
Solyc00g031490.1.1	0	0	0	0	0	0	0	0	0	0
Solyc00g031500.1.1	0	0	0	0	0	0	0	0	0	0
Solyc00g031700.1.1	0	0	0	0	0	0	0	0	0	0
Solyc00g031710.1.1	0	0	0	0	0	0	0	0	0	0
Solyc00g031720.1.1	0	0	0	0	0	0	0	0	0	0
Solyc00g031730.1.1	0	0	0	0	0	0	0	0	0	0
Solyc00g032030.1.1	0	0	0	0	0	0	0	0	0	0
Solyc00g032230.1.1	0	0	0	0	0	0	0	0	0	0
Solyc00g032940.1.1	0	0	0	0	0	0	0	0	0	0
Solyc00g033460.2.1	0.127295	0.244819	0.048755	0	0.103276	0.101703	0	0	0	0
Solyc00g033860.1.1	0	0	0	0	0	0	0	0	0	0
Solyc00g033870.1.1	0	0	0	0	0	0	0	0	0	0
Solyc00g033880.1.1	0	0	0	0	0	0	0	0	0	0
Solyc00g033890.1.1	0	0	0	0	0	0	0	0	0	0
Solyc00g033990.1.1	0	0	0	0	0	0	0	0	0	0
Solyc00g034000.1.1	0	0	0	0	0	0	0	0	0	0
Solyc00g034010.1.1	0	0	0	0	0	0	0	0	0	0
Solyc00g034810.1.1	0.0424318	0.0408031	0	0	0.0516382	0.0508513	0	0	0	0.0465931
Solyc00g035010.1.1	0	0	0	0	0	0	0	0	0	0
Solyc00g035020.1.1	0	0	0	0	0	0	0	0	0	0
Solyc00g036320.1.1	0	0.0408031	0	0	0	0	0	0	0	0
Solyc00g036520.1.1	0.0424318	0	0	0.0458437	0.0516382	0	0	0.118674	0.046639	0.0931862
Solyc00g036530.1.1	0	0	0	0	0	0	0	0.0593369	0	0.139779
Solyc00g036540.1.1	0	0	0	0	0	0.0508513	0	0	0	0
Solyc00g036740.1.1	0	0	0	0	0	0	0	0	0	0
Solyc00g036750.1.1	0.0424318	0.0408031	0	0.0458437	0	0	0	0.0593369	0	0
Solyc00g036760.1.1	0	0	0	0	0	0	0	0	0	0
Solyc00g036960.1.1	0	0	0	0	0	0	0	0	0	0
Solyc00g038390.1.1	0	0	0	0	0	0	0	0	0	0
Solyc00g039290.1.1	0	0	0	0	0	0	0	0	0	0
Solyc00g039990.2.1	6.23747	5.75324	6.04562	5.86799	3.76959	4.27151	5.81076	4.68762	5.08365	4.56612
Solyc00g040290.1.1	0	0	0	0	0	0	0	0	0	0
Solyc00g040390.1.1	0	0	0	0	0	0	0	0	0	0
Solyc00g040490.1.1	0	0	0	0	0	0	0	0	0	0
Solyc00g041090.1.1	0.0424318	0.0816063	0	0.0458437	0	0	0.067567	0	0	0
Solyc00g041190.1.1	0.0424318	0	0	0	0	0	0	0	0	0
Solyc00g041200.1.1	0	0	0	0	0	0	0	0	0	0
Solyc00g041210.1.1	0	0	0	0	0	0	0	0	0	0
Solyc00g041220.1.1	0	0	0	0	0	0	0	0	0	0
Solyc00g042120.1.1	0	0	0	0	0	0	0	0	0	0
Solyc00g042130.1.1	0	0	0	0	0	0	0	0	0	0
Solyc00g042140.1.1	0	0	0	0	0	0	0	0	0	0
Solyc00g042640.1.1	1.14566	1.3465	1.4139	1.51284	1.44587	1.37298	1.35134	1.42409	1.02606	1.30461
Solyc00g042840.1.1	0	0	0	0.0458437	0	0	0	0	0	0
Solyc00g042850.1.1	0	0	0	0	0	0	0.067567	0	0	0
Solyc00g044350.2.1	14.8511	16.1172	15.8454	19.0251	19.1578	20.4422	10.2702	11.2147	8.30174	7.36171
Solyc00g044550.1.1	0	0	0	0	0	0	0	0	0	0.0465931
Solyc00g044750.1.1	0	0	0	0	0	0	0	0	0	0
Solyc00g045570.1.1	0	0	0	0.0916873	0	0	0.135134	0	0	0.0465931
Solyc00g046570.1.1	0	0	0	0	0	0	0	0	0	0
Solyc00g046580.1.1	0	0	0	0	0	0	0	0	0	0
Solyc00g046980.1.1	0.0848636	0.0816063	0.048755	0.137531	0.0516382	0.0508513	0.067567	0.0593369	0.139917	0.0465931
Solyc00g047180.1.1	0	0	0	0	0	0	0	0	0	0
Solyc00g047190.1.1	0.0424318	0	0	0.0458437	0	0	0	0	0	0
Solyc00g047200.1.1	0.0848636	0	0.048755	0.0458437	0.0516382	0.101703	0.067567	0	0.046639	0.0465931
Solyc00g047700.2.1	252.893	247.553	266.446	260.025	191.991	187.438	376.416	365.456	321.109	333.467
Solyc00g047810.1.1	0	0	0	0	0	0	0	0	0	0
Solyc00g048410.1.1	0	0	0	0	0	0	0	0	0	0
Solyc00g048510.2.1	0	0	0	0	0	0	0	0	0	0
Solyc00g049210.1.1	0.678908	0.612047	0.68257	0.458437	1.03276	0.711918	1.08107	1.00873	0.792863	0.885269
Solyc00g049220.1.1	0.127295	0.0816063	0.0975101	0	0.154915	0.0508513	0.202701	0.118674	0.233195	0.186372
Solyc00g049520.2.1	0.169727	0	0.048755	0.0458437	0	0	0	0.0593369	0	0.0465931
Solyc00g049620.1.1	0	0	0	0	0	0	0	0	0	0
Solyc00g049920.1.1	0	0	0	0	0	0	0	0	0	0
Solyc00g050020.1.1	0	0	0	0	0	0	0	0	0	0
Solyc00g050030.1.1	0	0	0	0	0	0	0	0	0	0
Solyc00g050130.1.1	4.07345	3.99871	3.75414	3.48412	4.69907	3.66129	6.01346	7.00176	6.90257	5.31161
Solyc00g050430.2.1	12.0506	12.649	14.2365	13.8906	7.849	7.8311	19.2566	19.0472	16.4636	14.77
Solyc00g052430.2.1	0.381886	0.693653	0.633815	0.458437	0.619658	0.355959	0.67567	0.830717	0.699585	0.978455
Solyc00g052530.2.1	0	0.204016	0.0975101	0.0916873	0.103276	0.101703	0.270268	0.0593369	0.139917	0.0465931
Solyc00g052540.1.1	0	0	0	0	0.0516382	0	0	0	0	0
Solyc00g052940.2.1	0	0	0	0	0	0	0	0	0	0
Solyc00g053440.2.1	5.13425	5.99806	6.53317	5.95968	7.64245	7.7294	6.48643	7.89181	6.20299	6.01051
Solyc00g053740.1.1	0	0	0	0	0	0	0	0	0	0
Solyc00g055940.1.1	0	0	0	0	0	0	0	0	0	0
Solyc00g055950.1.1	0	0.122409	0.048755	0	0	0.0508513	0	0	0.046639	0
Solyc00g055960.1.1	0.0848636	0.0408031	0	0.0458437	0	0	0.067567	0	0	0.139779
Solyc00g055970.1.1	0.0424318	0	0	0	0	0	0	0	0	0
Solyc00g055980.1.1	0.0424318	0.0816063	0.048755	0.0916873	0	0.0508513	0.067567	0	0.139917	0
Solyc00g056180.1.1	0	0	0	0	0	0	0	0	0	0
Solyc00g056680.1.1	1.10323	1.50972	0.828836	1.60453	1.13604	0.711918	1.75674	1.42409	1.02606	1.02505
Solyc00g057280.1.1	0	0	0	0	0	0	0	0	0	0
Solyc00g057880.2.1	0	0	0	0	0	0	0	0	0	0
Solyc00g058280.1.1	0	0	0	0	0	0	0	0	0	0
Solyc00g058480.1.1	0	0	0	0	0	0	0	0	0	0
Solyc00g058490.1.1	0	0	0	0	0	0	0	0	0	0
Solyc00g058890.1.1	0	0	0	0	0	0	0	0	0	0
Solyc00g058900.1.1	0	0	0	0	0	0	0	0	0	0
Solyc00g059100.2.1	15.9968	14.5667	14.6265	15.9536	14.2521	14.1367	14.5269	17.0297	16.1371	14.3507
Solyc00g059500.1.1	1.65484	1.75453	0.926346	1.19194	0.929487	1.11873	1.35134	1.48342	1.35253	1.30461
Solyc00g060700.1.1	0	0	0	0	0	0	0	0	0	0
Solyc00g060710.1.1	0	0	0	0	0	0	0	0	0	0
Solyc00g060810.2.1	0	0	0	0	0	0	0	0	0	0
Solyc00g062710.1.1	0	0	0	0	0	0	0	0	0	0
Solyc00g063110.2.1	0	0	0	0	0	0	0	0	0	0
Solyc00g063510.1.1	0	0	0	0	0	0	0	0	0	0
Solyc00g065510.1.1	0	0	0	0	0	0	0	0	0	0
Solyc00g065610.1.1	0	0	0	0	0	0	0	0	0	0
Solyc00g065620.1.1	0	0	0	0	0	0	0	0	0	0
Solyc00g065630.1.1	0	0	0	0	0	0	0	0	0	0
Solyc00g065930.1.1	0	0	0	0	0	0	0	0	0	0
Solyc00g065940.1.1	0	0	0	0	0	0	0	0	0	0
Solyc00g066140.1.1	0	0	0	0	0	0	0	0	0	0
Solyc00g066150.1.1	0	0	0	0	0	0	0	0	0	0
Solyc00g066350.1.1	0.0424318	0	0	0	0	0	0	0	0	0
Solyc00g066360.1.1	0	0	0.048755	0	0	0	0	0	0.046639	0
Solyc00g066370.1.1	0	0	0	0	0	0	0	0	0	0
Solyc00g067470.1.1	0	0	0	0	0.0516382	0	0	0	0	0
Solyc00g068970.2.1	62.5444	60.1846	36.42	40.6175	48.5399	49.0715	59.5265	61.7697	79.6594	79.4878
Solyc00g068980.1.1	45.7415	45.3323	24.9626	32.8241	61.3461	70.785	69.121	74.9425	79.6128	92.4873
Solyc00g069680.1.1	0	0	0	0	0	0	0	0	0	0
Solyc00g069880.2.1	0.0848636	0.0816063	0.0975101	0.137531	0.0516382	0.203405	0.405402	0.356022	0.186556	0.326152
Solyc00g070680.1.1	0	0	0	0	0	0	0	0	0	0
Solyc00g071180.2.1	0	0	0.048755	0	0.103276	0.101703	0.135134	0	0.139917	0.279559
Solyc00g071580.1.1	0	0	0	0	0	0	0	0	0	0
Solyc00g071590.1.1	0	0	0	0	0	0	0	0	0	0
Solyc00g071600.1.1	0	0	0	0	0	0	0	0	0	0
Solyc00g072100.2.1	11.1596	10.7312	10.5311	11.6901	11.412	10.0686	15.8107	14.2409	15.5308	15.9348
Solyc00g072400.2.1	0	0	0	0	0	0	0	0	0	0
Solyc00g072800.2.1	0.0424318	0.0816063	0	0.0458437	0	0.0508513	0.067567	0	0	0.0931862
Solyc00g073200.1.1	0	0	0	0	0	0	0	0	0	0
Solyc00g073900.1.1	0	0	0	0	0	0	0	0	0	0
Solyc00g073910.1.1	0	0	0	0	0	0	0	0	0	0
Solyc00g074210.1.1	0.0424318	0	0	0	0	0.0508513	0	0	0	0
Solyc00g074810.1.1	0	0	0	0	0	0	0	0	0	0
Solyc00g074820.1.1	0	0	0	0	0	0	0	0	0	0
Solyc00g074830.1.1	0	0	0	0	0	0	0	0	0	0
Solyc00g075030.2.1	0.0424318	0.0408031	0.048755	0.0458437	0.103276	0.0508513	0	0.0593369	0.046639	0.0465931
Solyc00g075040.1.1	0.0424318	0.122409	0	0.0916873	0.154915	0.0508513	0	0	0.046639	0
Solyc00g075440.1.1	0	0.122409	0.048755	0	0.619658	0.508513	0.135134	0.356022	0.093278	0.186372
Solyc00g075450.2.1	0.0848636	0.122409	0.048755	0.320906	0.516382	0.610215	0.270268	0.0593369	0.233195	0.0465931
Solyc00g076250.1.1	0	0.0816063	0.0975101	0.0916873	0.103276	0.152554	0	0	0	0
Solyc00g079050.1.1	0	0	0	0	0	0	0	0	0	0
Solyc00g080550.1.1	0	0	0	0	0	0	0	0	0	0
Solyc00g080750.2.1	0.46675	0.367228	0.146265	0.229218	0.309829	0.203405	0.135134	0.118674	0.279834	0.0465931
Solyc00g082150.2.1	61.1018	61.0415	63.0403	65.9232	55.4078	54.1566	58.3779	57.4975	54.6143	52.324
Solyc00g082550.1.1	0	0	0	0	0	0	0	0	0	0
Solyc00g084650.1.1	0	0	0	0	0	0	0	0	0	0
Solyc00g084750.2.1	0	0	0	0	0	0	0	0	0	0
Solyc00g084760.1.1	0	0	0	0	0	0	0.067567	0	0	0
Solyc00g084770.1.1	0	0.0408031	0.048755	0.0458437	0	0	0	0.0593369	0	0
Solyc00g084870.2.1	2.20645	1.38731	1.70643	2.15465	5.0089	5.39024	3.44592	2.2548	3.35801	3.49448
Solyc00g085070.2.1	46.7174	47.3316	49.2913	48.6401	41.672	40.9353	28.1754	30.4992	22.8997	25.0671
Solyc00g085370.1.1	0	0	0	0	0	0	0	0	0	0
Solyc00g085770.1.1	0	0	0	0	0	0	0	0	0	0
Solyc00g085780.1.1	0	0	0	0	0	0	0	0	0	0
Solyc00g088080.1.1	0	0	0	0	0	0	0	0	0	0
Solyc00g088090.1.1	0	0	0	0	0	0	0	0	0	0
Solyc00g088190.1.1	0	0.0408031	0	0	0	0	0	0.0593369	0	0
Solyc00g088200.1.1	0	0	0	0	0	0	0	0	0	0
Solyc00g088210.1.1	0.0424318	0.0408031	0	0	0.0516382	0	0	0	0	0.0465931
Solyc00g090110.1.1	0	0	0	0	0	0	0	0	0	0
Solyc00g090120.1.1	0	0	0	0	0	0	0	0	0	0
Solyc00g090130.1.1	0	0	0	0	0	0	0.067567	0	0	0
Solyc00g090430.2.1	0	0	0	0	0	0	0.202701	0	0	0
Solyc00g090630.1.1	0	0	0	0	0	0	0	0	0	0
Solyc00g090640.1.1	0	0	0	0	0	0	0	0	0	0
Solyc00g090650.1.1	0	0	0	0	0	0	0	0	0	0
Solyc00g090660.1.1	0	0	0	0	0	0	0	0	0	0
Solyc00g090860.1.1	0	0	0	0	0	0	0	0	0	0
Solyc00g090870.2.1	22.5737	21.6665	18.7707	18.3833	20.2422	22.4763	17.3647	17.8604	19.4485	18.2179
Solyc00g091170.2.1	12.0082	12.3633	10.6286	9.7647	8.41702	7.62769	9.39181	7.95115	8.34838	8.52654
Solyc00g092870.1.1	0	0	0	0	0	0	0	0	0	0
Solyc00g092880.1.1	0	0	0	0	0	0	0	0	0	0
Solyc00g092890.1.1	0	0	0	0	0	0	0	0	0	0
Solyc00g092900.1.1	0	0	0	0	0	0	0	0	0	0
Solyc00g093000.1.1	0.636477	0.408031	0.633815	0.320906	0.309829	0.203405	0.202701	0.178011	0.652946	0.559117
Solyc00g093100.1.1	0	0	0	0	0	0	0	0	0	0
Solyc00g093300.1.1	0	0	0	0	0	0	0	0	0	0
Solyc00g093310.1.1	0	0	0	0	0	0	0	0	0	0
Solyc00g094010.1.1	0	0	0	0	0	0	0	0	0	0
Solyc00g094020.1.1	0	0	0	0	0	0	0	0	0	0
Solyc00g094520.1.1	0.339454	0.408031	0.633815	0.412593	0.516382	0.813621	0.540536	0.712043	0.792863	0.652303
Solyc00g094530.1.1	0.424318	0.489638	0.19502	0.137531	0.103276	0.254256	0.405402	0.356022	0.233195	0.419338
Solyc00g094540.1.1	0.509181	0.571244	0.438795	0.825186	0.929487	0.915323	0.810804	0.890054	1.11934	1.16483
Solyc00g094550.1.1	0	0.0408031	0	0	0.0516382	0	0	0	0	0
Solyc00g094850.1.1	0	0	0	0.0916873	0	0	0	0	0	0
Solyc00g095450.1.1	0	0	0	0	0	0	0	0	0	0
Solyc00g095460.1.1	0	0	0	0	0	0	0	0	0	0
Solyc00g095760.1.1	0	0	0	0	0	0	0	0	0	0
Solyc00g095860.1.1	0	0	0	0	0	0	0	0	0	0
Solyc00g096060.1.1	0	0	0	0	0	0	0	0	0	0
Solyc00g096460.1.1	4.87965	5.99806	6.67944	6.23474	6.0933	6.40726	4.12159	5.63701	5.82987	5.54458
Solyc00g097260.1.1	0	0	0	0	0	0	0.067567	0	0	0
Solyc00g097760.1.1	0	0	0	0	0	0	0	0	0	0
Solyc00g097960.1.1	7.93474	7.26296	6.8257	7.01408	6.0933	5.28853	5.06752	4.56894	6.10971	6.01051
Solyc00g098560.2.1	2.33375	2.16257	2.19398	2.88815	3.35648	2.59342	1.55404	1.00873	1.02606	1.44439
Solyc00g099160.1.1	0	0	0	0	0	0	0	0	0	0
Solyc00g099460.1.1	0	0	0	0	0	0	0	0	0	0
Solyc00g099470.1.1	0	0	0	0	0	0	0	0	0	0
Solyc00g099570.1.1	0	0	0	0	0	0	0	0	0	0
Solyc00g099580.1.1	2.37618	2.73381	1.75518	1.97128	1.54915	1.93235	1.62161	1.42409	2.23867	2.0035
Solyc00g099880.1.1	0	0	0	0	0	0	0	0	0	0
Solyc00g100880.2.1	0	0	0	0	0	0	0	0	0	0
Solyc00g101700.1.1	0	0	0	0	0	0	0	0	0	0
Solyc00g102000.1.1	11.8809	11.6697	5.80185	1.83375	2.47863	1.67809	3.58105	2.67016	7.69543	6.61622
Solyc00g102400.2.1	0	0	0	0	0	0	0	0	0	0
Solyc00g104200.1.1	0	0	0	0	0	0	0	0	0	0
Solyc00g104210.1.1	0	0	0	0	0	0	0	0	0	0
Solyc00g104310.1.1	0	0	0	0	0	0	0	0	0	0
Solyc00g104320.1.1	0	0	0	0	0	0	0	0	0	0
Solyc00g104330.1.1	0	0	0	0	0	0	0	0	0	0
Solyc00g104630.1.1	0	0	0	0	0	0	0	0	0	0
Solyc00g104730.1.1	0	0	0	0	0	0	0	0	0	0
Solyc00g104740.1.1	0	0	0	0	0	0	0	0	0	0
Solyc00g104940.1.1	0	0	0	0	0	0	0	0	0	0
Solyc00g105340.1.1	0	0	0	0	0	0	0	0	0	0
Solyc00g105350.1.1	0	0	0	0	0	0	0	0	0	0
Solyc00g105750.1.1	0	0	0	0	0	0	0	0	0.046639	0
Solyc00g106650.1.1	0.72134	0.571244	1.26763	0.962717	0.516382	0.355959	0.67567	0.77138	0.93278	0.652303
Solyc00g107050.1.1	0	0	0	0	0	0	0	0	0	0
Solyc00g107550.1.1	0	0	0	0	0	0	0	0	0	0
Solyc00g108550.1.1	0.381886	0.163213	0.243775	0.0458437	0.361467	0.610215	0.878371	0.593369	0.606307	0.512524
Solyc00g109450.1.1	0	0	0	0	0	0	0	0	0	0
Solyc00g109850.1.1	0	0	0	0	0	0	0	0	0	0
Solyc00g109860.1.1	0	0	0	0	0	0	0	0	0	0
Solyc00g110060.1.1	0	0	0	0	0	0	0	0	0	0
Solyc00g110070.1.1	0	0	0	0	0	0	0	0	0	0
Solyc00g110370.1.1	0	0	0	0	0	0	0	0	0	0
Solyc00g110870.2.1	16.2089	15.9132	18.1856	15.9536	11.2055	10.9839	20.135	16.911	16.3703	13.7916
Solyc00g111170.1.1	0	0	0	0	0	0	0	0	0	0
Solyc00g111270.1.1	0	0	0	0	0	0	0	0	0	0
Solyc00g111370.1.1	0	0	0	0	0	0	0	0	0	0
Solyc00g111770.1.1	0	0	0	0	0	0	0	0	0	0
Solyc00g111780.1.1	0	0	0	0	0	0	0	0	0	0
Solyc00g112180.1.1	0	0	0	0	0	0	0	0	0	0
Solyc00g112190.2.1	0	0.0816063	0.048755	0.0458437	0	0	0.067567	0	0	0.0465931
Solyc00g112490.1.1	0	0	0	0	0	0	0	0	0	0
Solyc00g112500.1.1	0	0	0	0	0	0	0	0	0	0
Solyc00g112600.1.1	0	0	0	0	0	0	0	0	0	0
Solyc00g112700.1.1	0	0	0	0	0	0	0	0	0	0
Solyc00g112710.1.1	0	0	0	0	0	0	0	0	0	0
Solyc00g112810.1.1	0	0	0	0	0	0	0	0	0	0
Solyc00g112820.1.1	0	0	0	0	0	0	0	0	0	0
Solyc00g112830.1.1	0	0	0	0	0	0	0	0	0	0
Solyc00g112930.2.1	0.0848636	0.0816063	0.243775	0.0916873	0.258191	0.101703	0	0.0593369	0.093278	0.0465931
Solyc00g113230.1.1	0	0	0	0	0	0	0	0	0	0
Solyc00g113330.1.1	0	0	0	0	0	0	0	0	0	0
Solyc00g113730.1.1	0	0	0	0	0	0	0	0	0	0
Solyc00g113740.1.1	0	0	0	0	0	0	0	0	0	0
Solyc00g113750.1.1	0	0	0	0	0	0	0	0	0	0
Solyc00g114550.1.1	0	0	0	0	0	0	0	0	0	0
Solyc00g116150.1.1	0	0	0	0	0	0	0	0	0	0
Solyc00g117450.2.1	0.72134	0.612047	0.19502	0.320906	0.258191	0.254256	0.067567	0.356022	0.093278	0.232965
Solyc00g117650.1.1	0	0	0	0	0	0	0	0	0	0
Solyc00g118680.2.1	2.84293	2.32578	2.34024	3.62165	3.30484	3.30533	2.49998	3.26353	2.47187	2.09669
Solyc00g118690.1.1	3.56427	3.18264	3.94916	3.80503	4.90563	5.54279	4.25672	4.56894	3.07817	2.51603
Solyc00g120120.1.1	0	0	0	0	0	0	0	0	0	0
Solyc00g120820.1.1	0	0	0	0	0	0	0	0	0	0
Solyc00g120830.1.1	0	0	0	0	0	0	0	0	0	0
Solyc00g120930.1.1	0	0	0	0	0	0	0	0	0	0
Solyc00g121230.1.1	0	0	0	0	0	0	0	0	0	0
Solyc00g121730.1.1	0	0	0	0	0	0	0	0	0	0
Solyc00g122530.1.1	0	0	0	0	0	0	0	0	0	0
Solyc00g123030.1.1	0	0	0	0	0	0	0	0	0	0
Solyc00g123040.1.1	0	0	0	0	0	0	0	0	0	0
Solyc00g123240.1.1	0	0	0	0	0	0	0	0	0	0
Solyc00g124840.1.1	0	0	0	0	0	0	0	0	0	0
Solyc00g124850.1.1	0	0	0	0	0	0	0	0	0	0
Solyc00g124860.1.1	0	0	0	0	0	0	0	0	0	0
Solyc00g125260.1.1	0	0	0	0	0	0	0	0	0	0
Solyc00g125270.1.1	0	0	0	0	0	0	0	0	0	0
Solyc00g125580.1.1	0	0	0	0	0	0	0	0	0	0
Solyc00g125980.1.1	4.75236	4.44754	4.92426	4.08009	5.88675	6.45811	7.09453	8.42584	6.66938	7.12874
Solyc00g125990.1.1	0.297022	0.571244	0.438795	0.458437	0.464744	0.254256	0.810804	0.356022	0.373112	0.512524
Solyc00g126000.1.1	3.30968	2.93783	4.48546	4.35515	4.33761	5.79705	4.39185	5.69635	3.5912	4.19338
Solyc00g126010.1.1	2.07916	1.50972	1.9502	2.24634	2.42699	2.23746	2.70268	2.43281	3.21809	2.32965
Solyc00g126420.1.1	0	0	0	0	0	0	0	0	0	0
Solyc00g126430.1.1	0	0	0	0	0	0	0	0	0	0
Solyc00g126440.1.1	0	0	0	0	0	0	0	0	0	0
Solyc00g127540.1.1	0	0	0	0	0	0.0508513	0	0	0	0
Solyc00g127550.1.1	0	0	0	0	0	0	0	0	0	0
Solyc00g127560.1.1	0	0	0	0	0	0	0.067567	0	0	0
Solyc00g127660.2.1	31.1874	30.8064	29.6918	30.5319	24.683	23.1882	30.1349	25.8116	27.8435	26.1387
Solyc00g127670.1.1	5.77072	6.65091	7.45952	6.83071	5.37037	4.57662	8.91884	8.24783	5.78323	6.80259
Solyc00g127870.2.1	22.0221	21.9521	20.6721	21.8674	20.6036	20.9507	25.2701	24.3281	21.4539	21.293
Solyc00g128870.2.1	53.2519	53.8601	44.4158	45.2477	52.6193	53.8007	41.4861	42.8413	39.5499	39.5109
Solyc00g129670.1.1	0	0	0	0	0	0	0	0	0	0
Solyc00g129680.1.1	0	0	0	0	0	0	0	0	0	0
Solyc00g129880.1.1	0	0	0	0	0	0	0	0	0	0
Solyc00g129980.1.1	0	0	0	0	0	0	0	0	0	0
Solyc00g130180.1.1	0	0	0	0	0	0	0	0	0	0
Solyc00g130190.1.1	0	0	0	0	0	0	0	0	0	0
Solyc00g130290.1.1	0	0	0	0	0	0	0	0	0	0
Solyc00g130690.1.1	0	0	0	0	0	0	0	0	0	0
Solyc00g130700.1.1	0	0	0	0	0	0	0	0	0	0
Solyc00g130800.1.1	0	0	0	0	0	0	0	0	0	0
Solyc00g130810.1.1	0	0	0	0	0	0	0	0	0	0
Solyc00g131610.1.1	0	0	0	0	0	0	0	0	0	0
Solyc00g131710.1.1	0	0	0	0	0	0	0	0	0	0
Solyc00g133110.1.1	0	0	0	0	0	0	0	0	0	0
Solyc00g133710.1.1	0	0	0	0	0	0	0	0	0	0
Solyc00g133720.1.1	0	0	0	0	0	0	0	0	0	0
Solyc00g134620.1.1	0	0	0	0	0	0	0	0	0	0
Solyc00g134820.1.1	0	0	0	0	0	0	0	0	0	0
Solyc00g134830.1.1	0	0	0	0	0	0	0	0	0	0
Solyc00g134840.1.1	0	0	0	0	0	0	0	0	0	0
Solyc00g135040.1.1	0	0	0	0	0	0	0	0	0	0
Solyc00g135050.1.1	0	0	0	0	0	0	0	0	0	0
Solyc00g135060.1.1	0	0	0.0975101	0	0	0.0508513	0	0	0	0
Solyc00g135260.1.1	0	0	0	0	0	0	0	0	0	0
Solyc00g136260.1.1	0.0848636	0.0816063	0.0975101	0.0458437	0.0516382	0	0.135134	0	0.093278	0.0465931
Solyc00g136560.2.1	0.763772	0.816063	1.07261	0.87103	0.981125	0.40681	1.41891	1.89878	1.02606	1.07164
Solyc00g138060.2.1	0	0	0	0	0	0	0	0	0	0
Solyc00g139760.1.1	0	0	0	0	0	0	0	0	0	0
Solyc00g140060.2.1	15.9968	14.9339	14.8703	16.3203	18.2799	16.2724	12.2972	13.4101	14.2715	14.9098
Solyc00g141360.1.1	0.0848636	0.0816063	0.48755	0.229218	0.309829	0.254256	0.270268	0.178011	0.186556	0.0465931
Solyc00g141560.1.1	0	0	0.048755	0.0916873	0.0516382	0.101703	0	0	0.093278	0.0465931
Solyc00g142160.1.1	0	0.0816063	0.0975101	0	0.0516382	0.0508513	0	0	0	0.0465931
Solyc00g142170.2.1	0.381886	0.448834	0.39004	0.183375	0.774573	0.457662	1.35134	1.18674	1.0727	0.885269
Solyc00g143770.1.1	7.12854	8.69107	8.92217	8.02264	7.53917	8.23791	7.29723	6.82375	7.13577	7.68786
Solyc00g144470.1.1	0	0	0.048755	0	0.0516382	0	0.337835	0.415359	0.559668	0.279559
Solyc00g145170.1.1	0.254591	0.775259	0.58506	0.733499	3.35648	2.49171	0.405402	0.296685	0.233195	0.512524
Solyc00g147570.2.1	0.297022	0.489638	0.19502	0.137531	0.103276	0.508513	0.270268	0.356022	0.652946	0.279559
Solyc00g147770.1.1	0.169727	0.204016	0.341285	0.183375	0.413105	0.305108	0.270268	0.118674	0.093278	0.0931862
Solyc00g149970.2.1	0	0	0	0	0	0	0	0	0	0
Solyc00g153680.1.1	0	0	0.048755	0	0.154915	0.152554	0.135134	0.178011	0.186556	0.0465931
Solyc00g153980.1.1	0	0	0	0	0.103276	0	0	0	0	0.0931862
Solyc00g154480.1.1	0	0	0	0.0458437	0	0	0	0	0	0
Solyc00g154980.1.1	0	0	0	0	0	0	0	0	0	0
Solyc00g156980.2.1	17.3546	18.6878	13.6514	11.5068	11.1538	11.1873	8.85127	8.1885	10.9135	10.6232
Solyc00g157080.1.1	0.0424318	0.0816063	0.0975101	0	0.103276	0.101703	0.067567	0.118674	0	0.0931862
Solyc00g157180.2.1	0	0	0	0	0	0	0	0	0	0
Solyc00g160780.2.1	0.509181	0.408031	0.19502	0	0.464744	0.457662	0.135134	0.0593369	0.559668	0.0931862
Solyc00g163580.1.1	0	0	0	0	0	0	0	0	0	0
Solyc00g164580.1.1	0	0.0408031	0.0975101	0	0.0516382	0	0.067567	0.237348	0.046639	0.0465931
Solyc00g164680.1.1	3.01266	2.73381	3.07157	2.42971	4.49252	3.9664	2.90538	2.90751	1.77228	2.0501
Solyc00g165080.1.1	0	0	0	0.0458437	0	0	0	0	0	0
Solyc00g165090.1.1	0	0	0	0	0	0	0	0	0	0
Solyc00g165190.1.1	0	0	0	0	0	0	0	0	0	0
Solyc00g166190.1.1	0	0	0	0	0	0	0	0	0	0
Solyc00g166490.1.1	0	0	0	0	0	0	0	0	0	0
Solyc00g166690.1.1	0.0424318	0	0.0975101	0.0916873	0.103276	0.0508513	0	0	0.046639	0
Solyc00g167290.1.1	0	0	0	0	0	0	0	0	0	0
Solyc00g167300.1.1	0	0	0	0	0	0	0	0	0	0
Solyc00g167800.1.1	0	0	0	0	0	0	0	0	0	0
Solyc00g168200.1.1	0	0	0	0	0	0	0.067567	0	0	0
Solyc00g170200.1.1	11.1596	11.4249	6.63068	8.25186	12.135	9.50919	11.9594	11.1553	11.8929	10.763
Solyc00g170210.2.1	4.11588	3.75389	4.48546	4.12593	5.57692	5.59364	5.33779	5.28099	4.10423	4.79909
Solyc00g170510.1.1	0	0	0	0	0	0	0	0	0	0
Solyc00g171710.1.1	0	0	0	0	0	0	0	0	0	0
Solyc00g171810.2.1	0.975931	1.02008	0.438795	1.0544	0.981125	0.813621	0.67567	1.06806	1.11934	1.39779
Solyc00g172410.1.1	0	0	0	0	0	0	0	0	0	0
Solyc00g173430.1.1	0	0	0	0	0	0	0	0	0	0
Solyc00g174330.2.1	0	0	0	0	0	0	0	0	0.046639	0
Solyc00g174340.1.1	0	0	0	0	0	0	0	0	0	0
Solyc00g175240.1.1	0	0	0	0	0	0	0	0	0	0
Solyc00g178340.1.1	0	0	0	0	0	0	0	0	0	0
Solyc00g179240.1.1	0.933499	0.897669	1.17012	0.733499	0.826211	1.37298	0.202701	0.415359	0.652946	0.512524
Solyc00g179640.1.1	0.254591	0.367228	0	0	0	0.0508513	0	0	0	0
Solyc00g179840.1.1	0	0	0	0	0	0	0	0	0	0
Solyc00g180440.1.1	0	0	0	0	0	0	0	0	0	0
Solyc00g180840.1.1	0	0	0	0	0	0	0	0	0	0
Solyc00g181240.1.1	0.0424318	0	0	0.0458437	0	0	0	0	0	0
Solyc00g181250.2.1	0.0424318	0.0816063	0.0975101	0.137531	0.0516382	0.0508513	0.135134	0.237348	0.046639	0.0931862
Solyc00g183050.1.1	0.339454	0.448834	0	0.366749	0.56802	0.610215	0.270268	0.296685	0.46639	0.652303
Solyc00g183550.1.1	0	0	0	0	0	0	0	0	0	0
Solyc00g184350.2.1	13.069	12.445	12.2375	12.1486	13.8907	13.5773	9.59451	10.1466	12.4992	12.021
Solyc00g185750.1.1	0	0	0	0	0	0	0	0	0	0
Solyc00g185850.1.1	0	0	0	0	0	0	0	0	0	0
Solyc00g186050.1.1	0.169727	0.0816063	0.048755	0	0.103276	0.0508513	0.135134	0.118674	0.186556	0
Solyc00g187050.2.1	0	0	0	0.0458437	0	0	0	0.0593369	0.046639	0
Solyc00g188250.1.1	0	0	0	0	0	0	0	0	0	0
Solyc00g188750.1.1	0	0	0.048755	0	0	0	0	0	0	0
Solyc00g188850.2.1	0.127295	0.285622	0.0975101	0.0916873	0.206553	0.0508513	0.202701	0.118674	0.093278	0.186372
Solyc00g192150.2.1	0	0	0	0	0	0	0	0	0	0
Solyc00g195350.1.1	0	0	0	0	0	0	0	0	0	0
Solyc00g195360.1.1	0	0	0	0	0	0	0	0	0	0.0465931
Solyc00g196060.2.1	121.567	123.062	126.763	129.05	127.546	129.976	211.214	208.629	242.29	239.162
Solyc00g196460.1.1	0	0	0	0	0	0	0.067567	0	0	0
Solyc00g198360.1.1	0	0	0	0	0	0	0	0	0	0
Solyc00g199960.1.1	0	0	0	0	0	0	0	0	0	0
Solyc00g201060.1.1	0	0.0408031	0	0	0	0	0	0	0	0
Solyc00g201160.2.1	1.23052	0.856866	0.731325	0.916873	0.929487	0.559364	0.608103	0.830717	0.606307	0.885269
Solyc00g201460.1.1	0	0	0	0	0	0	0	0	0	0
Solyc00g201760.1.1	0	0	0	0	0	0	0	0	0	0
Solyc00g202560.1.1	0	0	0	0	0	0	0	0	0	0
Solyc00g203660.1.1	0	0	0	0	0	0	0	0	0	0
Solyc00g206460.1.1	0.933499	0.734456	1.31639	1.65037	0.309829	0.711918	2.49998	3.44154	2.28531	2.09669
Solyc00g207960.1.1	0	0	0	0	0	0	0	0	0	0
Solyc00g209460.1.1	0.891067	0.979275	0.58506	0.962717	1.13604	1.22043	1.48647	1.06806	1.16597	0.60571
Solyc00g209560.1.1	0	0	0	0	0	0	0	0	0	0
Solyc00g210860.1.1	0	0	0.048755	0.137531	0	0.0508513	0	0	0	0.139779
Solyc00g212260.1.1	0	0.0408031	0.048755	0.137531	0	0.101703	0	0	0.093278	0
Solyc00g213960.1.1	0	0	0	0	0	0	0	0	0	0
Solyc00g215560.1.1	1.06079	0.734456	0.731325	0.412593	0.981125	1.42384	0.135134	0.890054	0.746224	0.559117
Solyc00g217560.1.1	0	0	0	0	0	0	0	0	0	0
Solyc00g217960.1.1	0.0424318	0	0	0	0.103276	0.305108	0.202701	0.652706	0.513029	0.60571
Solyc00g218560.1.1	0	0	0	0	0	0	0	0	0	0
Solyc00g220360.1.1	0.0424318	0	0	0	0	0	0	0	0	0
Solyc00g222060.1.1	0	0	0	0	0	0	0	0	0	0
Solyc00g222460.1.1	0	0	0	0	0	0	0	0.0593369	0	0
Solyc00g226760.1.1	0	0	0	0	0	0	0	0	0	0
Solyc00g227860.1.1	2.12159	2.6114	3.70538	3.75918	3.61467	2.54256	1.0135	0.890054	1.49245	1.39779
Solyc00g227960.1.1	0	0	0	0	0	0	0	0	0	0
Solyc00g228260.1.1	0	0	0	0	0	0	0	0	0	0
Solyc00g229260.1.1	0	0	0	0	0	0	0	0	0	0
Solyc00g230060.1.1	0.169727	0.163213	0	0	0.154915	0.203405	0.337835	0.534032	0.46639	0.326152
Solyc00g230070.1.1	0.551613	0.571244	0.048755	0.0458437	0	0	0	0.0593369	0.093278	0.139779
Solyc00g230080.1.1	0.848636	0.693653	0.39004	0.275062	0.0516382	0.152554	0.270268	0.118674	0.139917	0.186372
Solyc00g230280.1.1	0	0	0	0	0	0	0	0	0	0
Solyc00g231680.1.1	0	0	0	0	0	0	0	0	0	0
Solyc00g231780.1.1	0.763772	0.979275	0.29253	0.0916873	0.464744	0.610215	0.202701	0.474695	0.139917	0.279559
Solyc00g233480.1.1	0	0	0	0	0	0	0	0	0	0
Solyc00g237680.1.1	0	0	0	0	0	0	0	0	0	0
Solyc00g240580.1.1	0	0	0	0	0	0	0	0	0	0
Solyc00g244280.1.1	0.254591	0.244819	0.243775	0.0916873	0.103276	0.0508513	0.270268	0.178011	0.093278	0.0465931
Solyc00g244290.1.1	4.45534	3.71308	3.75414	4.90527	10.1727	9.76345	8.1756	8.1885	7.92863	8.66632
Solyc00g244300.1.1	8.23177	6.12047	7.21574	7.10577	11.412	12.306	12.2296	14.3595	9.65427	12.0676
Solyc00g245200.1.1	0	0	0.048755	0	0	0	0	0	0	0
Solyc00g246800.1.1	0	0	0	0	0	0	0	0	0	0
Solyc00g247300.2.1	0.0424318	0	0.0975101	0	0	0	0.067567	0.0593369	0.093278	0.0931862
Solyc00g249200.1.1	0	0	0	0	0	0	0	0	0	0
Solyc00g249900.2.1	1.31539	0.979275	1.31639	1.32947	0.826211	0.966174	0.743237	0.415359	1.11934	1.21142
Solyc00g249910.1.1	0	0	0	0	0	0	0	0	0	0
Solyc00g254110.1.1	0	0	0	0	0	0	0	0	0	0
Solyc00g254910.1.1	0.127295	0.244819	0.0975101	0	0.206553	0.152554	0.337835	0.0593369	0.093278	0.232965
Solyc00g255510.1.1	0	0	0	0.0458437	0.0516382	0	0	0	0	0
Solyc00g256710.1.1	0.594045	0.571244	0.877591	0.916873	0.826211	0.864472	0.810804	0.593369	0.559668	1.39779
Solyc00g257110.2.1	0.381886	0.693653	0.0975101	0.50428	0.981125	0.711918	0.270268	0.830717	0.746224	0.60571
Solyc00g263210.1.1	0	0	0	0	0	0	0	0	0	0
Solyc00g265110.2.1	0.46675	0.408031	0.39004	0.229218	0.464744	0.508513	0.405402	0.652706	0.652946	0.60571
Solyc00g265510.1.1	0	0	0	0	0	0	0	0	0	0
Solyc00g266110.1.1	0	0	0	0	0	0	0	0	0	0
Solyc00g268310.1.1	0	0	0	0	0	0	0	0	0	0
Solyc00g269810.1.1	0	0	0	0	0	0	0	0	0	0
Solyc00g270510.1.1	0	0	0	0	0	0	0	0	0	0
Solyc00g272810.1.1	0	0.0408031	0	0	0	0	0.067567	0	0	0
Solyc00g273110.1.1	0.509181	0.734456	0.438795	0.366749	0.413105	0.40681	0.405402	0.118674	0.279834	0.419338
Solyc00g275310.1.1	0	0	0	0	0	0	0	0	0	0
Solyc00g277510.1.1	1.99429	2.04016	0.341285	0.366749	0.0516382	0.203405	0.135134	0.0593369	0	0.0465931
Solyc00g278110.2.1	0.0848636	0.0408031	0.048755	0	0	0	0	0	0.186556	0.0465931
Solyc00g280110.1.1	0.678908	0.285622	0.633815	0.458437	0.309829	0.254256	0	0.0593369	0.046639	0
Solyc00g281110.1.1	0.0424318	0.0408031	0.0975101	0.0458437	0.0516382	0.0508513	0	0	0.046639	0
Solyc00g282510.1.1	0.975931	0.448834	1.17012	0.916873	3.97614	4.42406	1.75674	1.72077	2.33195	3.02855
Solyc00g283010.1.1	0	0	0.048755	0	0	0	0.067567	0	0	0
Solyc00g283110.1.1	0	0	0	0	0	0	0	0	0	0
Solyc00g284510.1.1	0	0	0	0	0	0	0	0	0	0
Solyc00g286010.1.1	0	0	0	0	0	0	0	0	0	0
Solyc00g286020.1.1	0	0	0	0	0	0	0	0	0	0
Solyc00g286030.1.1	0	0	0	0	0	0	0	0	0	0
Solyc00g287330.1.1	0	0	0	0	0	0	0	0	0	0
Solyc00g289230.1.1	0.806204	1.06088	1.17012	1.19194	0.981125	0.610215	0.878371	0.652706	1.30589	0.652303
Solyc00g294230.1.1	0.212159	0.204016	0.39004	0.320906	0.0516382	0	0.202701	0.0593369	0.233195	0.279559
Solyc00g294630.1.1	0	0	0	0	0	0	0	0	0.046639	0
Solyc00g297330.1.1	0	0	0	0	0	0	0	0	0	0
Solyc00g300430.1.1	0	0	0	0	0	0	0	0	0	0
Solyc00g300730.1.1	0	0	0	0	0	0	0	0	0	0
Solyc00g303630.1.1	0	0	0	0	0	0	0	0	0	0
Solyc00g304030.1.1	0	0	0	0	0	0	0	0	0	0
Solyc00g304630.1.1	0	0	0	0	0	0	0	0	0	0
Solyc00g306730.1.1	0	0.0408031	0	0	0	0	0	0	0	0
Solyc00g306830.1.1	0	0	0	0	0	0	0	0	0	0
Solyc00g308530.1.1	0	0	0	0	0	0	0	0	0	0
Solyc00g308930.1.1	0	0	0	0	0	0	0	0	0	0
Solyc00g309530.1.1	0	0	0	0	0	0.0508513	0	0	0	0
Solyc00g311230.2.1	9.33499	9.71114	10.141	9.58133	12.4448	12.1535	9.05398	9.84993	10.3539	10.9028
Solyc00g313030.1.1	0	0.0816063	0.048755	0.0916873	0	0	0.067567	0	0.093278	0
Solyc00g313530.1.1	0	0	0	0	0	0	0	0	0	0
Solyc00g313930.1.1	0	0	0	0	0	0	0	0	0	0
Solyc00g316030.1.1	0	0	0	0	0	0	0	0	0	0
Solyc00g316530.1.1	0.806204	0.816063	0.731325	0.825186	1.44587	1.01703	2.16214	1.95812	1.58573	1.91032
Solyc00g316730.1.1	0	0	0	0	0	0	0	0	0	0
Solyc00g318030.1.1	0	0	0	0	0	0	0	0	0	0
Solyc00g318130.1.1	0	0	0	0	0	0	0	0	0	0
Solyc00g318830.1.1	0.0424318	0.122409	0	0.0458437	0	0	0	0	0	0.0465931
Solyc00g320430.1.1	0.381886	0.367228	0.536305	0.366749	0.413105	0.305108	1.08107	0.830717	1.02606	0.698896
Solyc00g322630.1.1	0	0	0	0	0	0	0	0	0	0
Solyc00g322830.1.1	0	0	0	0	0	0	0	0	0	0
Solyc00g323130.2.1	3.22482	3.59068	5.07052	4.67605	2.58191	2.18661	0.945938	1.18674	1.25925	1.58417
Solyc00g324530.1.1	0	0	0	0	0	0	0	0	0	0
Solyc01g005000.2.1	37.8916	36.6412	30.8619	31.8614	24.2183	23.7984	94.9316	100.991	119.163	119.884
Solyc01g005010.2.1	8.91067	8.03822	9.55599	9.7647	8.41702	11.3398	0.337835	0.652706	0.886141	1.30461
Solyc01g005020.2.1	64.6236	63.7345	67.1844	70.37	60.6748	56.4958	52.7022	54.6493	55.5937	59.8721
Solyc01g005030.2.1	30.3387	29.8679	30.7644	31.953	38.5737	39.8166	26.5538	26.8203	24.9985	23.0636
Solyc01g005040.2.1	0	0	0.048755	0.0916873	0.0516382	0	0	0	0	0.0465931
Solyc01g005050.2.1	0	0	0	0	0	0	0	0	0	0
Solyc01g005060.2.1	2.20645	1.95855	2.9253	2.79646	1.54915	1.37298	1.82431	1.06806	2.09875	1.39779
Solyc01g005070.2.1	0.0424318	0.0408031	0.146265	0.183375	0	0.0508513	0	0	0	0
Solyc01g005080.2.1	18.2881	20.3608	18.8682	20.4463	22.9273	22.7305	19.8647	18.8098	17.5829	18.8236
Solyc01g005090.2.1	0	0	0	0	0	0	0	0	0	0
Solyc01g005100.2.1	14.9784	14.4851	16.2354	13.5697	19.0028	19.1201	12.4323	10.3246	11.0534	10.3903
Solyc01g005110.2.1	9.84417	9.83355	8.77591	7.65589	9.34651	8.39046	9.59451	9.19722	9.28116	9.31862
Solyc01g005120.2.1	10.2261	10.4048	11.6037	9.39795	11.3088	8.74642	5.94589	6.94242	10.5871	9.83114
Solyc01g005130.2.1	3.09752	4.03951	3.75414	4.17177	5.99003	6.71237	0.608103	0.296685	0.559668	0.792083
Solyc01g005140.2.1	0	0	0	0	0	0	0	0	0	0
Solyc01g005150.2.1	0	0	0	0	0	0	0	0	0	0.0465931
Solyc01g005160.2.1	0	0	0	0	0	0	0	0	0	0
Solyc01g005170.1.1	0.46675	0.448834	0.341285	0.458437	0.413105	0.457662	0.337835	0.474695	0.652946	0.326152
Solyc01g005180.1.1	0.763772	0.938472	0.975101	1.10025	1.03276	1.01703	0.608103	0.890054	0.559668	0.978455
Solyc01g005190.1.1	0.848636	0.612047	0.48755	0.595968	0.56802	0.661067	0.608103	0.593369	0.699585	0.465931
Solyc01g005200.1.1	0	0.122409	0.0975101	0.137531	0.0516382	0.305108	0	0.178011	0.093278	0.0931862
Solyc01g005210.2.1	87.5792	87.7267	100.045	98.1055	153.056	153.622	125.404	112.859	125.412	121.608
Solyc01g005220.2.1	0.0424318	0.0816063	0.048755	0	0.0516382	0	0	0.0593369	0	0
Solyc01g005230.2.1	0.0424318	0.0408031	0	0	0	0	0.067567	0	0	0
Solyc01g005240.2.1	77.7775	78.7092	83.6149	83.0687	84.2735	82.6842	74.3912	73.8745	73.3631	73.9898
Solyc01g005250.2.1	84.0574	78.9949	81.4697	81.4642	66.6132	66.2592	76.5534	78.4434	80.1724	79.2548
Solyc01g005260.2.1	9.54715	7.63019	7.31325	6.87655	8.00392	7.98365	5.74319	4.86563	5.64332	5.59117
Solyc01g005270.2.1	19.264	18.5246	17.9906	18.2916	17.6086	18.2048	11.1486	11.274	10.9602	11.3687
Solyc01g005280.2.1	65.2176	63.8977	44.5133	45.6603	68.8853	70.6833	20.3377	19.8185	27.3771	24.3682
Solyc01g005290.2.1	0.127295	0.0408031	0	0.0916873	0.154915	0	0.067567	0.0593369	0	0.232965
Solyc01g005300.2.1	20.3673	18.443	20.2333	20.6755	52.7226	55.9364	19.3242	20.8866	22.5266	20.5941
Solyc01g005310.2.1	0.0424318	0.122409	0	0.0916873	0.0516382	0	0.135134	0.0593369	0	0
Solyc01g005320.2.1	0.212159	0.285622	0.243775	0.183375	0.464744	0.457662	0.067567	0.356022	0.326473	0.512524
Solyc01g005330.2.1	148.129	152.4	160.404	158.94	141.953	140.909	157.904	148.461	153.629	148.352
Solyc01g005340.2.1	12.2628	11.0576	13.0176	12.3319	14.2005	13.5773	10.7431	11.808	11.0068	10.8562
Solyc01g005350.2.1	0.0848636	0	0	0.0458437	0.0516382	0.0508513	0	0	0.046639	0.0931862
Solyc01g005360.2.1	0	0	0	0	0	0	0	0	0	0
Solyc01g005370.2.1	1.40025	1.02008	1.65767	1.32947	1.44587	1.8815	0.878371	1.78011	1.35253	0.885269
Solyc01g005380.2.1	17.3122	14.5259	16.528	15.2201	12.0833	13.3739	15.3377	16.6737	16.0905	15.7485
Solyc01g005390.2.1	0	0.0408031	0.0975101	0	0	0	0.067567	0	0	0.0465931
Solyc01g005400.2.1	0	0	0	0	0	0	0	0	0	0
Solyc01g005410.2.1	0.169727	0.0408031	0.19502	0.0916873	0.0516382	0.203405	0.202701	0	0	0.139779
Solyc01g005420.2.1	0	0	0	0	0	0	0	0	0	0
Solyc01g005430.2.1	6.11018	6.73252	8.48338	7.93096	7.02279	6.45811	7.3648	5.93369	6.38954	6.33666
Solyc01g005440.2.1	138.031	133.753	136.368	136.385	209.29	205.643	114.391	111.731	131.662	133.862
Solyc01g005450.2.1	0	0	0	0	0	0	0	0.118674	0.046639	0.0931862
Solyc01g005460.2.1	8.82581	9.83355	7.60579	7.28914	8.10719	7.47514	6.21616	5.69635	9.23452	6.80259
Solyc01g005470.2.1	0.0848636	0	0	0.0458437	0	0.101703	0	0	0	0
Solyc01g005480.2.1	32.2906	31.908	32.5196	33.2825	29.3305	29.3412	26.2836	26.5236	27.5636	28.2354
Solyc01g005490.2.1	32.3754	31.5	31.7883	32.6865	30.828	31.0193	28.5133	31.1519	27.517	27.8161
Solyc01g005500.2.1	0	0	0.048755	0.0458437	0	0.0508513	0	0	0	0
Solyc01g005510.2.1	1.40025	1.38731	1.17012	1.0544	1.85897	1.77979	1.62161	0.949391	0.792863	0.838676
Solyc01g005520.2.1	7.55286	8.65026	7.94707	8.84783	6.71296	6.86492	8.44587	9.43457	8.58157	7.87423
Solyc01g005530.2.1	5.601	5.63083	5.8506	5.0428	3.45976	4.27151	4.12159	5.34032	4.29079	4.28656
Solyc01g005540.2.1	17.6516	17.3005	19.7458	19.2543	15.0267	15.8656	13.6485	14.3595	15.764	14.77
Solyc01g005550.2.1	283.741	275.992	292.286	276.575	255.919	248.459	196.823	194.447	210.948	205.382
Solyc01g005560.2.1	220.56	224.948	194.728	189.289	166.378	171.826	290.403	297.159	293.499	293.257
Solyc01g005570.2.1	18.5427	18.2798	18.6244	20.0337	20.6036	20.188	17.0269	17.8604	17.3031	16.8667
Solyc01g005580.2.1	23.7194	20.4016	25.5964	22.9218	19.416	18.7641	28.5808	26.5829	24.9519	24.1818
Solyc01g005590.2.1	2.97022	3.01943	2.04771	2.75062	3.35648	3.55959	2.77025	3.56022	3.40465	3.16833
Solyc01g005600.2.1	44.7655	41.252	38.9065	43.9641	42.963	43.9864	39.1213	36.4329	39.2234	42.7259
Solyc01g005610.2.1	0	0	0	0	0	0	0	0	0	0.0465931
Solyc01g005620.2.1	445.661	449.161	399.743	405.625	331.827	330.889	462.023	458.971	427.306	418.546
Solyc01g005630.1.1	0	0	0	0	0	0	0	0	0	0
Solyc01g005640.2.1	16.3362	17.1781	16.5767	18.1083	17.0922	15.6113	14.1891	16.199	16.1837	15.7019
Solyc01g005650.1.1	0	0	0	0	0	0	0	0	0	0
Solyc01g005660.1.1	0	0	0	0	0	0	0	0	0	0
Solyc01g005670.2.1	5.98288	4.93718	5.26554	4.99696	5.57692	5.9496	5.81076	5.16231	4.4307	4.33316
Solyc01g005680.2.1	0	0	0	0	0	0	0	0	0	0
Solyc01g005690.2.1	33.1392	33.0097	33.9823	35.4372	27.7297	27.002	28.6484	29.6685	31.2481	29.8662
Solyc01g005700.2.1	34.8365	37.2533	38.7603	34.016	38.2639	35.1891	37.1618	37.2043	35.1192	34.1527
Solyc01g005710.2.1	0	0	0	0	0	0	0	0	0	0
Solyc01g005720.2.1	0.0848636	0	0	0	0	0	0	0	0	0.0465931
Solyc01g005730.2.1	0.0424318	0	0	0	0	0	0	0	0	0
Solyc01g005740.2.1	0	0	0	0	0.0516382	0	0	0	0	0
Solyc01g005750.1.1	0	0	0	0	0	0	0	0	0	0
Solyc01g005760.2.1	0	0	0	0	0	0	0	0	0	0
Solyc01g005770.2.1	0.212159	0.367228	0.341285	0.183375	0.619658	0.610215	0.337835	0.356022	0.419751	0.372745
Solyc01g005780.1.1	0	0.122409	0.0975101	0.0458437	0.154915	0.101703	0.135134	0	0.139917	0.0465931
Solyc01g005790.1.1	15.233	15.5052	17.3568	17.3748	16.1111	14.5943	11.7567	12.9355	12.9656	11.8346
Solyc01g005800.2.1	5.64343	5.2636	6.33815	4.35515	6.91951	5.28853	8.1756	8.60386	7.32232	6.47644
Solyc01g005810.2.1	77.8623	77.5259	76.1554	71.4244	64.083	63.6658	70.8102	70.4923	69.3055	74.5489
Solyc01g005820.2.1	393.088	394.077	381.167	389.717	398.182	405.946	453.915	468.465	459.301	464.347
Solyc01g005830.2.1	92.8407	90.8278	98.2414	95.8133	72.6033	72.8699	83.8506	80.8762	88.4275	91.1827
Solyc01g005840.2.1	6.57693	6.73252	6.63068	8.06849	9.03668	8.74642	7.5675	7.41712	7.83535	7.64127
Solyc01g005850.1.1	1.31539	0.938472	0.780081	1.23778	1.03276	1.01703	0.878371	0.890054	0.746224	0.885269
Solyc01g005860.2.1	0.127295	0.163213	0.048755	0.137531	0.0516382	0.152554	0.135134	0.0593369	0	0.0931862
Solyc01g005870.1.1	0.0424318	0	0	0	0.0516382	0.0508513	0	0	0	0
Solyc01g005880.1.1	0.0424318	0.122409	0.0975101	0	0.206553	0	0.067567	0.0593369	0.093278	0.0465931
Solyc01g005890.1.1	0.0424318	0.0408031	0	0	0.103276	0	0	0	0	0
Solyc01g005900.2.1	1.18809	2.04016	1.51141	1.83375	1.91061	1.42384	1.89188	2.01746	1.0727	1.21142
Solyc01g005910.2.1	5.98288	5.63083	5.8506	5.68462	5.0089	4.98343	5.74319	5.16231	5.08365	5.35821
Solyc01g005920.2.1	2.6732	2.48899	1.46265	1.69622	1.80734	1.42384	1.68917	1.72077	0.979419	2.09669
Solyc01g005930.2.1	1.99429	2.12176	2.24273	2.15465	1.91061	2.69512	2.29728	2.7295	2.14539	1.77054
Solyc01g005940.2.1	0.212159	0.204016	0.146265	0.0458437	0.103276	0	0.135134	0	0.046639	0.0465931
Solyc01g005950.2.1	31.6117	32.2753	30.8132	29.4316	24.2699	23.4933	29.3916	30.2025	27.7968	27.1172
Solyc01g005960.2.1	251.069	248.124	238.217	240.45	240.582	245.561	238.038	234.144	237.299	232.686
Solyc01g005970.2.1	11.0323	12.6898	13.8464	12.7445	11.9284	12.7128	13.3783	12.8761	13.5719	13.3256
Solyc01g005980.2.1	8.65608	8.65026	7.50828	7.56421	8.41702	7.37344	7.22967	7.77314	7.27568	6.15029
Solyc01g005990.2.1	19.6459	20.524	19.7458	17.0997	11.7219	10.6788	16.7566	16.021	16.3236	14.8166
Solyc01g006000.2.1	30.466	32.7241	32.9584	29.615	30.828	29.4937	27.4998	27.0576	25.2317	23.1568
Solyc01g006010.2.1	51.4697	51.3711	44.9034	44.4225	55.8209	57.9196	45.1347	46.6388	45.5197	45.9408
Solyc01g006020.2.1	45.8263	44.6386	42.0756	37.4084	54.4783	53.6481	36.1483	37.0856	37.7776	39.3246
Solyc01g006030.2.1	17.7789	19.3407	20.0383	18.7501	18.2799	18.1539	18.3107	19.6999	17.6295	19.6623
Solyc01g006040.2.1	14.3844	15.6276	16.1379	15.1284	17.2988	15.6113	14.9323	13.5882	14.4581	12.5335
Solyc01g006050.2.1	0	0	0	0	0	0	0	0	0	0
Solyc01g006060.2.1	0.0424318	0	0	0	0	0.0508513	0	0	0	0
Solyc01g006070.2.1	0	0	0	0	0	0	0	0	0	0
Solyc01g006080.1.1	0.297022	0.571244	0.29253	0.412593	0.206553	0.203405	0.472969	0.237348	0.326473	0.512524
Solyc01g006090.2.1	6.02531	7.14055	8.53213	7.79342	6.97115	7.88195	9.86478	9.25656	9.56099	8.1072
Solyc01g006100.2.1	296.004	294.109	285.217	274.099	221.063	220.542	209.052	206.908	220.462	217.683
Solyc01g006110.2.1	78.711	74.7921	78.3493	78.4385	82.208	79.7348	68.2426	68.4155	74.9022	77.1582
Solyc01g006120.2.1	308.903	314.796	323.295	332.688	373.137	377.164	303.984	295.023	282.959	287.712
Solyc01g006130.2.1	7.46799	7.7934	8.14209	8.48108	7.849	7.06833	7.70264	7.53579	6.80929	5.63776
Solyc01g006140.2.1	15.9968	17.0557	16.3817	16.5954	11.2055	10.4754	17.9728	18.2164	17.0699	17.3792
Solyc01g006150.2.1	47.863	47.8213	43.392	43.9182	42.24	41.9015	34.4592	32.6947	32.6473	30.6583
Solyc01g006160.2.1	555.602	553.78	461.223	487.272	538.121	590.078	701.21	727.233	695.854	757.464
Solyc01g006170.2.1	71.1157	70.671	73.2301	75.0003	51.5865	51.4106	80.5398	79.6895	93.791	93.3726
Solyc01g006180.2.1	30.6782	35.4171	38.9065	37.3626	39.0385	38.2402	33.5808	35.3648	33.6733	33.1743
Solyc01g006190.2.1	216.19	218.256	213.888	211.569	218.894	216.321	164.323	167.983	166.361	169.04
Solyc01g006200.2.1	1.14566	1.3057	1.17012	1.65037	1.60078	0.864472	0.337835	0.237348	0.513029	0.512524
Solyc01g006210.2.1	22.6586	20.524	20.9159	21.2256	19.4676	20.6965	15.6755	17.3857	17.6762	15.2359
Solyc01g006220.2.1	30.5085	27.5013	31.9345	31.953	29.7952	30.7142	27.3646	30.4992	23.0863	23.9488
Solyc01g006230.2.1	35.3881	36.478	36.9563	36.7666	38.6254	40.5285	37.7699	40.2304	40.4826	37.4143
Solyc01g006240.2.1	0	0	0	0	0.0516382	0	0	0	0	0
Solyc01g006250.1.1	1.99429	2.36658	2.24273	2.33803	2.11716	2.18661	2.43241	2.43281	2.7517	2.18988
Solyc01g006260.2.1	11.2444	13.3426	11.6525	13.1113	14.5103	14.8486	14.3918	13.7068	14.085	12.9529
Solyc01g006270.2.1	0	0	0	0	0	0	0	0	0	0
Solyc01g006280.2.1	96.2777	96.0914	93.9022	92.4208	70.7443	70.1748	120.945	113.096	109.462	106.419
Solyc01g006290.2.1	0.0424318	0.163213	0.048755	0	0	0.0508513	0	0	0	0.0931862
Solyc01g006300.2.1	0	0.0816063	0	0.0458437	0.103276	0.152554	0	0.0593369	0	0.0465931
Solyc01g006310.2.1	0	0	0	0	0	0	0	0	0	0
Solyc01g006320.2.1	2.33375	2.04016	2.19398	2.42971	1.96225	1.52554	2.09458	1.83944	1.49245	1.07164
Solyc01g006330.2.1	1.23052	1.38731	1.75518	1.0544	1.18768	1.01703	2.49998	2.13613	1.44581	1.72394
Solyc01g006340.2.1	14.5541	15.4236	16.9668	16.8246	15.7496	16.5267	16.1485	14.0035	13.7585	15.2359
Solyc01g006350.2.1	205.752	207.362	211.158	212.119	213.524	202.846	187.161	180.74	183.944	183.53
Solyc01g006360.2.1	51.4697	53.6153	53.2405	54.0497	61.5011	59.0383	39.0537	38.391	41.6953	39.5575
Solyc01g006370.2.1	965.153	966.667	933.415	917.011	849.345	831.368	752.764	759.335	776.119	769.904
Solyc01g006380.2.1	0.72134	0.775259	1.21888	0.916873	0.877849	1.32213	0.67567	0.77138	0.513029	0.698896
Solyc01g006390.2.1	85.5849	85.7274	98.924	96.2717	119.594	125.908	19.662	20.5899	35.2591	34.9914
Solyc01g006400.2.1	759.105	761.794	898.458	949.973	856.212	893.355	1374.45	1392.16	1216.95	1268.73
Solyc01g006410.2.1	0.46675	0.367228	0.633815	1.0544	0.774573	1.16958	0.337835	0.534032	0.606307	0.465931
Solyc01g006420.2.1	0.509181	1.02008	0.29253	0.366749	0.516382	0.457662	1.0135	0.77138	1.0727	1.07164
Solyc01g006430.2.1	998.717	996.943	1022.93	1016.26	1523.79	1503.42	1071.81	1032.64	979.279	993.039
Solyc01g006440.1.1	0	0	0	0	0.0516382	0.101703	0	0	0	0
Solyc01g006450.2.1	107.819	110.821	99.0215	101.177	75.1852	74.0903	118.512	123.658	105.218	106.092
Solyc01g006460.1.1	0	0	0	0.0916873	0	0	0	0	0	0
Solyc01g006470.1.1	0	0	0	0	0	0	0	0	0	0
Solyc01g006480.2.1	19.0943	17.7086	19.307	19.3002	14.9751	14.3401	20.4728	17.6231	17.4896	18.9168
Solyc01g006490.2.1	16.803	15.8316	16.3329	17.0538	18.5897	19.1201	16.1485	16.6737	16.79	16.9599
Solyc01g006500.2.1	8.91067	8.85428	10.3361	8.29771	10.4309	9.10238	8.51344	10.2653	8.86141	7.87423
Solyc01g006510.2.1	37.0005	34.9275	38.5165	35.1621	59.0224	58.4281	42.5672	40.7051	40.6692	38.812
Solyc01g006520.2.1	2.12159	2.5706	2.14522	2.24634	3.82122	3.10193	2.43241	2.43281	2.93826	2.98196
Solyc01g006530.1.1	0	0	0	0	0	0	0	0	0	0
Solyc01g006540.2.1	1.867	1.71373	1.21888	0.87103	0.361467	0.254256	0.743237	0.652706	0.46639	0.465931
Solyc01g006550.2.1	0	0	0	0	0	0	0	0	0	0
Solyc01g006560.2.1	0.0424318	0.204016	0.58506	0.779342	0.154915	0.203405	0.067567	0	0.186556	0.0931862
Solyc01g006570.1.1	0	0	0	0	0	0	0	0	0	0
Solyc01g006580.2.1	0	0	0	0	0	0	0	0	0	0
Solyc01g006590.1.1	0	0	0	0	0	0	0	0	0	0
Solyc01g006600.1.1	0	0	0	0	0	0	0	0	0	0
Solyc01g006610.1.1	0	0.0816063	0.19502	0.366749	0.0516382	0.101703	0	0	0.046639	0.0931862
Solyc01g006620.2.1	0	0	0	0	0	0	0	0	0	0
Solyc01g006630.2.1	74.8072	72.0991	70.7923	70.966	54.2201	58.0722	60.8103	62.0071	63.7089	62.2018
Solyc01g006640.1.1	0	0.0408031	0	0	0	0	0	0	0	0
Solyc01g006650.1.1	5.601	6.36529	7.21574	7.61005	7.07443	5.9496	8.31074	9.79059	6.06307	6.29007
Solyc01g006660.1.1	5.55856	5.59003	7.94707	6.73902	5.57692	4.93257	237.025	242.273	135.953	137.403
Solyc01g006670.2.1	0.763772	0.65285	0.731325	0.916873	0.826211	0.813621	0.270268	1.06806	0.746224	0.60571
Solyc01g006680.2.1	19.7732	20.524	19.5995	19.1168	32.8935	34.1721	22.7701	22.726	21.7804	20.268
Solyc01g006690.2.1	0.381886	0.408031	1.17012	0.687655	0.258191	0.711918	1.68917	1.06806	0.652946	0.745489
Solyc01g006700.2.1	220.179	215.481	200.627	202.492	178.203	176.352	178.107	166.796	177.695	176.215
Solyc01g006710.2.1	41.3286	41.7008	45.7322	42.3596	40.1745	41.1387	43.9861	38.9844	38.757	39.8371
Solyc01g006720.2.1	0	0	0.048755	0	0.258191	0.254256	0.067567	0	0	0.0931862
Solyc01g006730.2.1	0.46675	0.285622	0.438795	0.366749	0.619658	0.610215	0.270268	0.178011	0.233195	0.139779
Solyc01g006740.2.1	40.0132	39.7014	38.5165	36.4916	47.094	46.5289	26.5538	28.5411	25.4649	21.3396
Solyc01g006750.2.1	0	0	0	0	0	0	0	0	0	0
Solyc01g006760.2.1	0	0	0	0	0	0	0	0	0	0
Solyc01g006770.1.1	0	0	0	0	0.0516382	0	0	0	0	0
Solyc01g006780.2.1	5.51613	5.34521	6.43566	6.69318	5.78347	6.30556	2.56755	2.43281	1.44581	1.02505
Solyc01g006790.2.1	17.0151	14.7707	20.5259	21.3173	25.0445	26.2901	7.63507	7.95115	7.60215	8.15379
Solyc01g006800.2.1	134.933	135.67	139.001	133.222	113.552	114.059	127.904	135.763	129.983	127.432
Solyc01g006810.2.1	28.8536	28.1134	29.9356	31.7697	29.0723	29.8497	27.2971	30.2618	26.8641	25.6262
Solyc01g006820.2.1	8.61365	9.83355	11.4087	12.4236	9.96617	10.5771	14.9323	14.4782	11.2866	11.2289
Solyc01g006830.2.1	49.0936	49.0862	47.3899	52.1701	50.2956	48.0036	35.9456	35.6615	30.3153	33.1277
Solyc01g006840.2.1	0.0848636	0.0816063	0	0.0458437	0	0	0	0.0593369	0	0
Solyc01g006850.1.1	6.2799	5.71244	6.67944	6.69318	5.83511	4.57662	5.60806	5.51833	5.68996	5.91732
Solyc01g006860.2.1	10.5231	10.8944	13.0176	12.0569	14.1489	10.1703	13.3107	13.0541	11.4732	11.4153
Solyc01g006870.2.1	19.0094	18.8918	22.2323	21.2256	21.9979	20.7473	17.2296	20.4712	17.6295	20.0816
Solyc01g006880.2.1	44.808	45.2915	47.8287	47.3565	55.0463	56.089	38.851	36.7296	39.5032	35.9699
Solyc01g006890.2.1	80.1112	78.0564	93.6584	92.8793	108.079	107.245	68.9859	65.2113	69.119	68.1657
Solyc01g006900.2.1	407.388	403.053	378.144	370.004	429.062	417.336	203.985	201.33	201.201	202.167
Solyc01g006910.2.1	0.0424318	0.122409	0	0.0916873	0.0516382	0.101703	0.135134	0.118674	0.046639	0
Solyc01g006920.2.1	3.05509	2.97863	4.04667	3.43828	2.94338	4.27151	2.70268	3.14486	2.70506	2.37625
Solyc01g006930.2.1	20.7067	20.1159	21.7447	20.3546	31.1895	31.6295	3.51348	4.45027	4.99037	4.56612
Solyc01g006940.2.1	20.0702	21.6257	20.2333	19.4377	19.0028	16.069	18.2431	18.7505	19.635	19.7089
Solyc01g006950.2.1	0.0848636	0.244819	0.19502	0.229218	0.154915	0.101703	0.202701	0.178011	0.419751	0.0465931
Solyc01g006960.2.1	55.8402	56.2675	59.9199	58.359	60.4167	58.9875	46.0131	48.3596	46.8255	48.1307
Solyc01g006970.2.1	61.3139	65.1218	69.0859	68.1695	77.6638	73.8869	58.513	59.871	59.5113	59.8255
Solyc01g006980.2.1	66.4482	66.7131	67.7695	66.7025	52.5677	51.1564	81.8236	81.0543	76.8144	73.6637
Solyc01g006990.2.1	16.2089	17.3005	18.1369	17.9707	24.5798	23.5441	15.135	13.8848	15.6707	15.4689
Solyc01g007000.2.1	0	0	0	0	0	0	0.202701	0	0	0
Solyc01g007010.2.1	0	0	0	0	0	0	0	0	0	0
Solyc01g007020.2.1	0.0424318	0.0408031	0	0	0.103276	0	0	0	0	0
Solyc01g007030.2.1	0	0	0	0	0	0	0.067567	0.0593369	0	0
Solyc01g007040.2.1	0	0	0	0	0	0	0	0	0	0
Solyc01g007050.1.1	0	0	0	0.0458437	0.103276	0	0	0	0	0.0465931
Solyc01g007060.2.1	44.6807	44.0674	45.7322	45.2936	36.8697	40.1725	48.0401	46.4015	43.5608	42.1667
Solyc01g007070.2.1	1.78213	1.50972	2.9253	3.16321	3.97614	3.71214	4.39185	5.10298	4.4307	4.7059
Solyc01g007080.2.1	0.0424318	0	0.0975101	0	0.258191	0.152554	0.405402	0.118674	0	0.0931862
Solyc01g007090.1.1	0	0	0	0	0	0	0.067567	0	0	0
Solyc01g007100.2.1	31.8238	31.0104	37.5901	36.6749	38.4704	38.8504	38.4456	37.679	41.3688	41.2815
Solyc01g007110.2.1	52.87	55.125	73.2301	70.1867	68.8337	70.6833	66.8237	60.1677	64.8748	66.5349
Solyc01g007120.2.1	33.606	31.9897	34.1773	32.7324	30.0534	32.138	30.8105	30.2025	32.4607	30.3787
Solyc01g007130.2.1	47.566	48.4333	49.1451	49.282	49.1079	48.7155	33.7159	33.5254	36.2385	36.4824
Solyc01g007140.2.1	22.107	20.728	22.4273	21.2715	19.3127	16.4758	20.8782	20.3526	20.7077	22.3181
Solyc01g007150.2.1	128.526	129.632	128.908	123.503	93.5167	95.041	110.675	103.306	114.312	109.54
Solyc01g007160.2.1	16.6333	15.3012	18.6732	16.2287	13.271	12.9671	15.3377	13.8255	14.9245	13.6052
Solyc01g007170.2.1	127.805	129.713	137.002	143.995	127.598	139.536	159.728	158.786	154.795	163.402
Solyc01g007180.2.1	3.05509	4.08031	2.82779	3.9884	4.18269	4.62747	4.18915	3.08552	3.03153	3.91382
Solyc01g007190.2.1	2.92779	2.6522	2.63277	2.15465	2.32372	2.13575	2.09458	1.95812	2.47187	2.37625
Solyc01g007200.2.1	97.1263	94.9081	86.0039	86.8738	89.1275	92.0917	76.8912	77.494	44.0738	45.7078
Solyc01g007210.2.1	0	0	0	0	0	0	0	0	0	0
Solyc01g007220.2.1	0.0848636	0.0816063	0	0	0.0516382	0.254256	0.202701	0.0593369	0.046639	0.186372
Solyc01g007230.2.1	6.74665	6.5693	7.31325	7.33499	5.93839	5.79705	7.9729	7.35778	6.80929	7.4083
Solyc01g007240.2.1	0.0848636	0	0.0975101	0.0458437	0.0516382	0	0.067567	0.0593369	0.233195	0
Solyc01g007250.2.1	14.639	16.4845	13.1639	15.4493	13.0645	11.8992	17.2296	20.0559	19.3552	17.6588
Solyc01g007260.2.1	0.169727	0.244819	0.146265	0.275062	0.154915	0.101703	0.067567	0.237348	0.046639	0.0465931
Solyc01g007270.1.1	3.94616	2.85622	3.80289	4.7219	6.7646	7.7294	6.68913	7.29844	8.11518	7.54808
Solyc01g007280.2.1	0.72134	1.2649	0.536305	1.19194	0.981125	0.864472	0.270268	0.296685	0.419751	0.512524
Solyc01g007290.1.1	0.72134	0.65285	0.243775	0.275062	0.309829	0.254256	0.135134	0.178011	0.139917	0.139779
Solyc01g007300.1.1	0.763772	0.612047	0.146265	0.229218	0.258191	0.203405	0.540536	0.474695	0.373112	0.372745
Solyc01g007310.2.1	0.212159	0.204016	0.243775	0.0916873	0.0516382	0.0508513	0.270268	0.118674	0.233195	0.0465931
Solyc01g007320.2.1	492.506	496.941	355.083	352.125	350.623	336.991	555.468	560.497	411.029	408.528
Solyc01g007330.2.1	44.4685	44.3122	7.45952	7.42668	8.36538	8.39046	9.66208	9.67192	7.32232	6.56963
Solyc01g007340.2.1	0.594045	0.530441	0.146265	0.50428	0.464744	0.305108	0.135134	0.178011	0.373112	0.326152
Solyc01g007350.2.1	0.297022	0.408031	0.146265	0.137531	0.103276	0.355959	0.135134	0.118674	0.186556	0.0931862
Solyc01g007360.2.1	0.254591	0.367228	0.0975101	0.137531	0.154915	0.203405	0.067567	0.0593369	0.186556	0.0931862
Solyc01g007370.2.1	0.297022	0.326425	0.243775	0.183375	0.206553	0.152554	0.202701	0	0.279834	0.326152
Solyc01g007380.1.1	1.18809	0.775259	0.48755	0.641811	0.981125	0.762769	0.743237	0.593369	0.559668	0.652303
Solyc01g007390.1.1	0.127295	0.0408031	0.048755	0.0458437	0.0516382	0.0508513	0.067567	0	0.046639	0
Solyc01g007400.1.1	1.82457	1.59132	0.975101	1.00856	1.03276	1.22043	0.945938	0.949391	1.35253	1.67735
Solyc01g007410.2.1	3.13995	3.67228	1.9502	2.5214	2.42699	2.33916	2.56755	1.78011	2.47187	1.86372
Solyc01g007420.2.1	0.0848636	0.0816063	0	0	0.0516382	0.0508513	0	0.118674	0.046639	0.0465931
Solyc01g007430.2.1	0.678908	1.02008	0.68257	0.275062	0.516382	0.508513	1.21621	1.1274	0.792863	0.652303
Solyc01g007440.1.1	0.127295	0.0816063	0.048755	0	0	0	0	0	0	0
Solyc01g007450.1.1	0.0848636	0	0	0	0	0	0	0	0.093278	0.0465931
Solyc01g007460.2.1	0.297022	0.204016	0.341285	0.183375	0.0516382	0.152554	0.067567	0.296685	0.233195	0.0931862
Solyc01g007470.1.1	0.381886	0.367228	0.0975101	0.0916873	0.206553	0.305108	0.337835	0.118674	0.373112	0.279559
Solyc01g007480.1.1	0.381886	0.408031	0.243775	0.229218	0.671296	0.254256	0.67567	0.712043	0.559668	0.512524
Solyc01g007490.2.1	21.8524	22.9314	12.0912	12.5153	16.989	16.1707	18.3107	18.5725	16.3236	13.7916
Solyc01g007500.2.1	7.00124	7.54858	2.29149	1.7879	2.27208	2.0849	2.83781	1.78011	1.63236	2.0501
Solyc01g007510.1.1	0	0	0	0	0	0	0	0	0	0
Solyc01g007520.2.1	0.509181	0.489638	0.19502	0.137531	0.206553	0.101703	0.067567	0.0593369	0.326473	0.139779
Solyc01g007530.2.1	2.37618	2.44819	1.02386	0.687655	0.929487	0.813621	1.14864	0.652706	0.139917	0.372745
Solyc01g007540.2.1	0.424318	0.530441	0.29253	0.137531	0.103276	0.152554	0.270268	0.237348	0.186556	0.186372
Solyc01g007550.1.1	0	0	0	0	0	0.0508513	0	0.0593369	0.046639	0
Solyc01g007560.2.1	0.0848636	0.122409	0.0975101	0.0458437	0.154915	0.0508513	0.202701	0.178011	0.139917	0.186372
Solyc01g007570.2.1	0.594045	0.693653	0.341285	0.320906	0.413105	0.661067	1.0135	0.830717	0.93278	0.512524
Solyc01g007580.2.1	0	0	0	0	0	0	0	0	0	0
Solyc01g007590.2.1	0	0	0	0	0	0	0	0	0	0
Solyc01g007600.2.1	3.69156	2.6114	1.65767	2.15465	1.91061	2.28831	1.95944	2.90751	2.23867	2.37625
Solyc01g007610.2.1	10.6504	10.0376	4.14418	3.89671	4.64744	5.13598	9.45938	7.0611	5.68996	6.19688
Solyc01g007620.2.1	0	0	0	0	0	0	0	0	0	0
Solyc01g007630.2.1	109.092	108.292	66.0631	64.9146	99.61	100.33	136.215	144.723	84.1367	83.2619
Solyc01g007640.2.1	2.88536	2.24417	1.85269	2.01712	2.11716	2.18661	2.16214	1.89878	2.14539	2.18988
Solyc01g007650.2.1	0.0848636	0.122409	0	0.0916873	0.0516382	0	0.067567	0	0.233195	0.0465931
Solyc01g007660.2.1	0.636477	1.14249	0.536305	0.183375	0.413105	0.305108	0.743237	0.415359	0.699585	0.465931
Solyc01g007670.2.1	3.35211	3.26425	2.63277	3.2549	2.94338	2.94937	4.52699	3.50088	3.49792	3.58767
Solyc01g007680.1.1	0.169727	0.285622	0.048755	0.0458437	0.103276	0.0508513	0.202701	0.0593369	0.046639	0.0465931
Solyc01g007690.2.1	15.3179	15.4236	1.21888	1.14609	1.23932	1.32213	1.41891	1.78011	1.58573	1.63076
Solyc01g007700.2.1	127.974	125.633	4.97301	5.36371	2.89174	2.59342	2.63511	2.96685	3.03153	4.42634
Solyc01g007710.2.1	487.244	467.563	35.6887	37.9127	16.2144	18.9675	17.5674	19.2845	24.159	24.9273
Solyc01g007720.2.1	8.18933	8.44625	2.77904	2.70478	2.06553	2.13575	3.78375	3.73823	3.54456	4.42634
Solyc01g007730.2.1	491.996	478.417	43.392	44.1933	25.4576	25.6799	29.5268	27.117	28.2632	30.6583
Solyc01g007740.2.1	36.6611	39.2934	37.1513	35.7122	27.7297	27.7648	37.8375	35.2461	33.8133	33.6402
Solyc01g007750.2.1	12.0506	10.568	11.1161	12.2861	16.8857	14.4418	11.7567	11.096	11.6597	10.8562
Solyc01g007760.2.1	62.3323	63.6529	61.6751	59.5968	53.0324	54.9194	53.986	55.302	52.8886	53.0229
Solyc01g007770.2.1	1.18809	1.46891	2.19398	1.42115	2.06553	2.03405	2.56755	2.07679	2.37859	1.72394
Solyc01g007780.2.1	2.29132	2.32578	2.34024	2.15465	3.45976	3.35618	2.90538	3.14486	2.79834	2.7024
Solyc01g007790.2.1	7.08611	8.77267	7.2645	7.01408	8.72685	8.69557	7.3648	7.77314	7.60215	6.89578
Solyc01g007800.2.1	21.3008	22.9722	16.5767	16.5496	25.3543	27.358	24.5268	24.1501	22.8997	26.8842
Solyc01g007810.1.1	5.00695	5.46762	3.99791	3.52996	3.14993	4.16981	5.20266	5.34032	4.33743	4.00701
Solyc01g007820.1.1	0.46675	0.612047	0.68257	1.37531	0.981125	0.864472	1.0135	1.1274	0.746224	0.372745
Solyc01g007830.1.1	0.127295	0.285622	0.58506	0.320906	0.309829	0.254256	0.270268	0.178011	0.233195	0.279559
Solyc01g007840.2.1	40.1405	37.3757	34.0798	36.5374	51.5865	49.9868	39.2564	37.5603	38.6171	41.0019
Solyc01g007850.2.1	17.8213	18.6062	18.917	19.8962	15.8013	15.4079	16.7566	15.6056	17.4896	16.1212
Solyc01g007860.2.1	283.741	280.685	267.129	265.664	257.003	254.663	244.863	239.128	239.071	224.299
Solyc01g007870.2.1	119.573	121.349	87.8566	89.9453	105.962	103.432	98.7154	96.7192	101.486	102.272
Solyc01g007880.2.1	18.967	17.3413	18.2344	19.4836	21.0684	19.3235	18.3782	15.843	17.443	17.0997
Solyc01g007890.1.1	0.678908	0.571244	0.68257	0.916873	0.722934	0.457662	1.14864	0.830717	0.279834	0.465931
Solyc01g007900.2.1	30.5933	29.4599	27.5953	28.744	28.8141	27.5614	27.77	26.8796	22.8997	25.0671
Solyc01g007910.2.1	128.441	131.06	119.499	119.239	94.8593	98.8549	141.283	139.679	144.161	141.876
Solyc01g007920.2.1	6.53449	6.4877	6.97197	6.78486	10.7924	9.56004	10.9459	7.65446	10.1673	10.2505
Solyc01g007930.2.1	15.1481	17.0149	17.4543	18.1999	31.9124	30.5108	18.5134	19.7592	20.5678	22.3181
Solyc01g007940.2.1	0.424318	0.204016	0.536305	0.641811	0.309829	0.355959	0.270268	0.0593369	0.139917	0.0931862
Solyc01g007950.2.1	18.4578	17.6678	19.8921	18.5667	14.407	14.6452	15.4728	13.2321	13.5719	13.9779
Solyc01g007960.2.1	0.551613	0.571244	1.07261	0.595968	0.826211	0.864472	0.608103	0.237348	0.233195	0.0931862
Solyc01g007970.1.1	0.0848636	0.0408031	0	0.137531	0.103276	0.0508513	0	0.0593369	0	0
Solyc01g007980.2.1	0	0	0	0	0.0516382	0.101703	0.067567	0	0.046639	0
Solyc01g007990.2.1	12.8144	12.853	12.53	11.2775	14.7169	13.8824	11.4864	9.55325	10.1207	10.4369
Solyc01g008000.2.1	303.26	300.229	294.237	304.448	330.639	325.702	259.863	260.904	264.163	265.953
Solyc01g008010.2.1	14.0874	12.2817	12.0425	12.1486	10.3276	12.4586	10.8783	11.7487	10.9602	10.5766
Solyc01g008020.2.1	34.0303	36.4372	36.9563	37.4084	41.0007	42.3083	34.1213	36.4329	36.0986	32.4288
Solyc01g008030.2.1	0	0.0408031	0	0	0	0.101703	0	0	0	0
Solyc01g008040.1.1	0.806204	0.816063	0.536305	0.779342	0.56802	0.711918	0.472969	0.415359	0.606307	0.745489
Solyc01g008050.2.1	0.169727	0.285622	0.19502	0.183375	0	0.101703	0.202701	0	0	0.0931862
Solyc01g008060.2.1	80.4931	82.7487	81.4209	85.4068	90.3668	89.1423	80.7425	82.953	88.241	83.2619
Solyc01g008070.2.1	12.6447	14.5667	14.6265	14.5324	18.3316	20.6965	10.2702	9.19722	10.074	10.8562
Solyc01g008080.2.1	351.717	351.927	286.29	283.543	331.879	339.89	286.349	288.971	325.727	325.825
Solyc01g008090.2.1	223.913	210.626	178.736	196.486	324.598	330.584	339.659	341.365	387.757	399.489
Solyc01g008100.2.1	24.3558	26.4812	29.8868	29.9359	30.8796	28.1716	29.6619	32.9913	23.2262	24.7409
Solyc01g008110.2.1	823.558	807.698	984.169	991.003	666.597	655.931	531.82	528.336	385.938	386.909
Solyc01g008120.2.1	141.934	140.2	161.769	154.401	151.868	155.503	126.823	127.99	130.682	128.55
Solyc01g008130.2.1	4.5402	4.69236	5.70434	5.63877	4.80235	4.47491	5.40536	4.56894	4.94373	5.87073
Solyc01g008140.2.1	26.7745	26.114	27.4978	25.9475	26.6969	27.4597	25.9457	28.0664	23.9258	25.8126
Solyc01g008150.1.1	0.169727	0.367228	0.341285	0.50428	0.671296	0.661067	0.337835	0.534032	0.46639	0.279559
Solyc01g008160.2.1	18.4578	17.7902	19.0632	21.3173	16.266	16.2216	20.6755	22.3107	20.6611	19.1964
Solyc01g008170.2.1	74.3829	71.8135	80.4458	87.7906	79.5744	81.7689	65.4048	69.4242	68.5127	70.0294
Solyc01g008180.2.1	114.354	108.904	117.207	118.964	130.231	130.942	81.8236	81.5883	80.9653	78.1366
Solyc01g008190.2.1	8.35906	7.71179	9.26346	10.4524	11.7735	12.8145	9.72964	10.2653	9.60763	9.4118
Solyc01g008200.2.1	8.31663	8.07902	6.77695	7.05993	8.36538	9.20408	7.83777	8.95988	7.50888	7.17534
Solyc01g008210.2.1	7.93474	9.1807	9.99478	9.81055	9.96617	11.1873	11.9594	10.5026	8.58157	7.08215
Solyc01g008220.2.1	1.27295	1.87694	1.4139	1.65037	1.13604	1.57639	0.810804	1.18674	1.30589	1.07164
Solyc01g008230.2.1	45.9536	41.9456	49.0476	49.9238	50.1923	51.8175	49.3239	46.8762	49.0642	48.6898
Solyc01g008240.2.1	0	0.0408031	0	0	0	0	0	0	0	0
Solyc01g008250.2.1	7.84988	8.40544	7.41077	7.01408	9.91453	9.25493	11.3513	9.49391	9.04796	9.83114
Solyc01g008260.2.1	9.97147	11.7921	10.8724	11.6901	8.77849	9.45834	10.3377	12.4014	11.0534	10.2039
Solyc01g008270.2.1	59.8288	59.5726	56.4096	56.021	45.1318	47.1391	56.7563	59.8116	59.1849	55.8651
Solyc01g008280.2.1	72.0916	74.4657	62.2602	66.9318	63.4633	70.0731	61.8238	60.5237	66.4139	65.6497
Solyc01g008290.2.1	30.5509	28.807	30.9594	32.6407	26.0256	24.968	31.8916	31.2706	33.207	31.6833
Solyc01g008300.1.1	0.0848636	0.244819	0.39004	0.275062	0.103276	0.305108	0.202701	0.534032	0.373112	0.326152
Solyc01g008310.2.1	133.406	131.59	128.421	129.371	98.8871	94.6851	125.404	131.609	125.599	125.056
Solyc01g008320.2.1	43.6623	41.456	40.9542	41.6719	50.5021	51.2072	40.2024	41.2392	43.281	41.8406
Solyc01g008330.2.1	116.433	119.635	110.576	114.242	76.9925	75.565	110.202	110.367	110.581	111.59
Solyc01g008340.2.1	33.4362	31.2552	32.0321	33.42	27.265	23.1373	30.743	33.5847	33.5334	33.0811
Solyc01g008350.2.1	0.763772	0.367228	0.48755	0.458437	0.464744	0.661067	0.540536	0.534032	0.513029	0.372745
Solyc01g008360.2.1	3.94616	3.8763	2.58402	2.84231	3.40812	3.9664	3.24321	3.56022	3.73112	2.88877
Solyc01g008370.2.1	312.765	320.631	288.142	280.334	278.743	269.563	306.551	307.247	291.634	287.433
Solyc01g008380.1.1	0.297022	0.163213	0.29253	0.275062	0.464744	0.203405	0.472969	0.118674	0.186556	0.279559
Solyc01g008390.1.1	0	0.0408031	0	0	0.103276	0.0508513	0.067567	0	0.093278	0
Solyc01g008400.2.1	0.0848636	0.163213	0	0	0	0.203405	0	0.237348	0	0
Solyc01g008410.1.1	0.339454	0.204016	0.29253	0.320906	0.516382	0.40681	0.608103	0.949391	0.792863	0.419338
Solyc01g008420.2.1	1.06079	0.979275	1.65767	1.32947	0.929487	1.57639	0.540536	0.534032	0.699585	0.745489
Solyc01g008430.1.1	0	0	0	0	0	0	0	0	0	0
Solyc01g008440.2.1	14.2995	13.6282	13.7977	13.8906	19.3127	17.3911	16.4863	15.1309	15.4375	14.9098
Solyc01g008450.1.1	0.0424318	0.0408031	0	0.0458437	0	0.0508513	0	0.0593369	0	0
Solyc01g008460.2.1	20.7067	19.9119	17.9906	18.3375	19.6741	19.7811	21.3512	18.7505	20.0081	22.6908
Solyc01g008470.2.1	30.8479	31.7448	30.5207	30.486	33.4099	32.0363	32.0267	32.2793	31.2015	35.038
Solyc01g008480.2.1	9.25013	8.11982	7.16699	7.15161	8.62357	7.52599	7.29723	6.1117	5.7366	6.15029
Solyc01g008490.2.1	8.99554	9.05829	9.26346	9.0312	13.1677	12.4077	8.78371	9.43457	9.28116	7.54808
Solyc01g008500.2.1	0.339454	0.204016	0.146265	0.229218	0.361467	0.355959	0.202701	0.237348	0.279834	0
Solyc01g008510.2.1	0.0424318	0	0	0	0	0	0.067567	0	0.046639	0.0465931
Solyc01g008520.2.1	6.02531	5.54923	5.36305	5.95968	7.74573	8.44131	6.1486	6.52706	5.45676	4.79909
Solyc01g008530.2.1	17.9062	18.1166	18.8194	19.346	20.3454	20.2388	10.4729	10.7993	8.44166	8.66632
Solyc01g008540.2.1	0	0.0408031	0	0.0458437	0	0	0	0	0	0.0465931
Solyc01g008550.2.1	159.798	156.847	175.762	172.556	162.712	158.453	116.958	115.826	120.329	120.21
Solyc01g008560.2.1	21.4705	20.728	24.6213	22.6468	23.1339	20.6965	22.7025	24.1501	23.2729	20.5941
Solyc01g008570.1.1	0	0	0	0	0	0	0	0	0	0
Solyc01g008580.1.1	0	0	0	0	0	0	0	0	0	0
Solyc01g008590.1.1	0	0	0	0	0	0	0	0	0	0
Solyc01g008600.2.1	269.315	270.81	297.064	300.918	306.782	303.023	277.971	272.416	285.104	277.322
Solyc01g008610.2.1	0	0	0	0	0	0	0	0	0	0
Solyc01g008620.2.1	0	0	0	0	0	0	0	0	0	0
Solyc01g008640.2.1	0.127295	0.0816063	0.146265	0.137531	0	0	0.135134	0.0593369	0	0
Solyc01g008650.2.1	0.127295	0.122409	0.39004	0.0458437	0.103276	0.0508513	0.405402	0.178011	0.233195	0.279559
Solyc01g008660.2.1	24.865	23.6658	25.3039	23.9304	30.0018	30.3582	21.1485	22.1327	26.1645	25.5796
Solyc01g008670.2.1	0.509181	0.775259	0.48755	0.366749	0	0.0508513	0.270268	0.356022	0.373112	0.60571
Solyc01g008680.2.1	2.03673	1.91775	1.4139	1.83375	1.34259	1.42384	1.89188	1.83944	1.72564	1.86372
Solyc01g008690.2.1	0	0	0	0	0	0	0	0	0	0
Solyc01g008700.2.1	18.2881	18.7286	19.3557	16.7329	16.1627	15.9165	14.7972	15.4276	14.5514	17.0531
Solyc01g008710.2.1	0	0	0	0	0	0	0	0	0	0
Solyc01g008720.1.1	0	0	0	0	0	0	0	0	0	0
Solyc01g008730.2.1	19.0094	20.1159	20.3796	20.1254	21.688	24.6629	19.7971	23.5568	18.8888	17.9383
Solyc01g008740.1.1	0	0	0	0	0	0	0	0	0	0
Solyc01g008750.1.1	0	0.0408031	0	0.0458437	0	0	0	0.0593369	0	0
Solyc01g008760.2.1	0.594045	0.448834	0.39004	0.50428	0.671296	0.40681	0.540536	0.415359	0.373112	0.372745
Solyc01g008770.2.1	131.369	132.447	133.052	134.689	138.287	143.248	110.202	107.222	112.12	106.092
Solyc01g008780.2.1	29.5325	29.8271	24.8163	25.9017	36.3533	35.545	22.162	22.37	22.48	21.7124
Solyc01g008790.2.1	2.03673	2.08096	2.82779	2.2005	2.68518	3.15278	3.31078	4.27226	3.54456	3.68085
Solyc01g008800.1.1	0.297022	0.693653	0.39004	0.641811	0.154915	0.457662	0.540536	0.237348	0.139917	0.465931
Solyc01g008810.2.1	61.4837	59.5726	58.7011	52.2618	66.6649	66.5135	51.6212	52.8099	48.318	50.1342
Solyc01g008820.2.1	63.2658	66.0603	71.9137	66.6109	54.943	54.7668	69.7291	71.679	69.3522	70.2158
Solyc01g008830.1.1	0	0.0816063	0	0	0	0	0	0	0	0
Solyc01g008840.2.1	43.7896	41.1296	41.2955	40.6175	39.3483	39.0029	34.797	35.7208	38.4772	36.3892
Solyc01g008850.2.1	1.78213	1.3465	1.99896	2.88815	1.34259	1.01703	1.89188	2.43281	1.81892	1.91032
Solyc01g008860.1.1	0.0848636	0	0	0.0458437	0	0.0508513	0.945938	1.72077	0.792863	0.60571
Solyc01g008870.1.1	0	0	0	0	0	0	0	0	0	0
Solyc01g008880.1.1	0	0.0408031	0	0	0	0.0508513	0	0	0	0
Solyc01g008890.2.1	28.5142	26.726	24.7676	25.214	30.5698	31.0193	23.4457	25.1589	23.0863	23.7625
Solyc01g008900.2.1	12.1779	12.5674	13.0663	12.7904	12.2899	12.5603	11.554	11.9267	13.0589	10.8096
Solyc01g008910.2.1	6.95881	6.03886	9.60474	8.20602	11.5669	12.1535	23.0403	22.7854	21.5472	18.9634
Solyc01g008920.2.1	4.58263	4.77397	3.9004	4.53852	5.42201	4.98343	3.91888	4.74695	4.10423	4.42634
Solyc01g008930.2.1	21.9372	24.6859	22.2323	20.813	22.3077	20.188	20.3377	22.192	23.9724	22.7374
Solyc01g008940.2.1	0	0	0	0	0	0	0	0.0593369	0	0
Solyc01g008950.2.1	335.635	334.749	309.936	294.316	305.905	297.938	266.552	260.608	282.446	276.157
Solyc01g008960.2.1	2591.65	2555.46	2568.17	2501.09	3628.41	3557.4	1840.86	1848.94	2169.83	2162.48
Solyc01g008970.2.1	591.287	591.972	646.833	659.095	637.163	658.778	672.494	672.169	663.253	678.349
Solyc01g008980.2.1	7.38313	7.8342	6.97197	7.9768	8.9334	8.39046	8.1756	8.01049	5.96979	6.56963
Solyc01g008990.2.1	34.5395	33.4994	33.2022	33.3742	27.6781	25.7816	35.5402	33.11	28.6363	29.5866
Solyc01g009000.2.1	28.0474	27.9909	32.0321	32.2281	32.1706	32.2397	29.9997	31.5672	32.6007	32.522
Solyc01g009010.2.1	15.9968	15.954	16.2842	16.7788	14.8718	16.8826	16.6215	17.7417	15.9039	16.0746
Solyc01g009020.2.1	23.3799	24.3595	21.2084	20.3087	23.4954	21.6626	23.1079	22.9041	24.0191	24.6943
Solyc01g009030.2.1	98.4842	97.8051	96.9738	96.0425	92.2774	89.4983	86.9587	79.6302	81.0586	83.4016
Solyc01g009040.2.1	183.942	182.268	161.867	159.674	130.335	125.399	134.729	137.246	143.042	143.553
Solyc01g009050.2.1	104.509	103.15	105.603	104.936	119.336	120.111	90.1343	91.7349	87.3082	92.0214
Solyc01g009060.2.1	65.2601	64.9178	62.6015	61.6139	75.0303	72.4122	60.3373	59.6336	58.6252	58.5675
Solyc01g009070.2.1	25.7561	26.4812	26.5227	26.2226	26.7486	27.2563	21.216	20.0559	19.5417	17.4258
Solyc01g009080.2.1	0.848636	1.10168	2.43775	1.60453	1.70406	1.77979	2.70268	1.78011	2.51851	2.51603
Solyc01g009090.2.1	228.622	232.619	244.848	250.536	271.41	283.445	236.957	235.924	243.036	240.56
Solyc01g009100.2.1	210.589	209.402	176.249	174.114	116.341	121.738	249.998	247.02	235.76	244.194
Solyc01g009110.2.1	4.79479	4.44754	4.48546	4.53852	5.42201	6.00045	4.52699	4.27226	4.01095	4.0536
Solyc01g009120.2.1	1.48511	1.3465	1.36514	1.51284	1.54915	1.72894	1.0135	1.06806	0.699585	1.67735
Solyc01g009130.1.1	0	0	0	0	0	0	0	0	0	0
Solyc01g009140.1.1	0	0	0	0	0	0	0	0	0	0
Solyc01g009150.2.1	13.4084	12.2817	13.6514	14.4866	14.5103	13.2213	12.7026	13.3508	13.1056	13.6984
Solyc01g009160.2.1	1.65484	1.2649	3.21783	3.48412	1.85897	2.03405	2.02701	2.19547	1.72564	1.53757
Solyc01g009170.2.1	108.074	109.108	105.116	109.933	122.176	124.331	74.5939	78.2654	77.1875	79.3014
Solyc01g009180.2.1	83.6755	87.1147	83.7124	84.2148	77.354	78.1076	94.0532	92.2689	96.4961	103.25
Solyc01g009190.1.1	0.0424318	0	0	0	0.103276	0.101703	0	0	0.046639	0.0931862
Solyc01g009200.2.1	0	0	0	0	0	0	0	0	0	0
Solyc01g009210.1.1	0	0	0	0	0	0	0	0	0	0
Solyc01g009220.2.1	0	0	0	0	0	0	0	0	0	0
Solyc01g009230.2.1	21.4705	20.2792	19.8433	21.6841	17.4537	16.0182	19.7296	17.5637	15.8573	16.261
Solyc01g009240.2.1	2.54591	2.81542	2.43775	2.84231	3.56303	3.55959	1.82431	1.72077	1.49245	1.53757
Solyc01g009250.2.1	0.169727	0.163213	0.146265	0.0916873	0.258191	0.152554	0.067567	0.178011	0.326473	0.372745
Solyc01g009260.1.1	0	0	0	0	0	0	0	0	0	0
Solyc01g009270.1.1	0	0	0	0	0	0	0	0	0	0
Solyc01g009280.2.1	61.3988	63.4897	69.9635	63.356	87.9398	85.9387	73.4453	71.857	72.2438	75.341
Solyc01g009290.2.1	54.0157	54.9618	58.3598	56.892	54.943	57.0551	58.7157	58.9809	59.9311	59.1732
Solyc01g009300.2.1	32.8846	32.9689	33.2509	31.9989	33.1517	30.9684	40.3375	40.6458	51.8159	47.9443
Solyc01g009310.2.1	118.427	119.064	117.11	114.288	100.436	103.279	78.8507	82.8344	87.1683	87.4552
Solyc01g009320.1.1	0	0	0	0	0	0	0	0	0	0
Solyc01g009330.1.1	0.127295	0	0.048755	0.0458437	0.0516382	0.0508513	0	0	0	0
Solyc01g009340.2.1	6.49206	6.77332	10.6286	8.66445	6.24822	6.45811	2.29728	2.43281	2.42523	2.32965
Solyc01g009350.2.1	0.0848636	0	0.146265	0.0458437	0.103276	0.152554	0.067567	0.118674	0	0.0465931
Solyc01g009360.1.1	0.0424318	0.0408031	0.048755	0	0	0.0508513	0	0	0	0.0465931
Solyc01g009370.1.1	0	0	0.048755	0	0.0516382	0	0.202701	0.593369	0.186556	0.186372
Solyc01g009380.2.1	33.9879	32.5201	28.2779	27.1395	30.7763	31.4769	24.189	25.8709	24.672	24.275
Solyc01g009390.2.1	16.7606	16.9741	16.2842	15.6327	18.0734	19.9337	13.8512	16.8517	15.4375	15.8417
Solyc01g009400.2.1	0	0	0	0	0.0516382	0	0	0	0	0
Solyc01g009410.2.1	0	0	0	0.0458437	0	0	0	0	0	0
Solyc01g009420.2.1	195.483	198.222	209.452	208.451	191.887	195.116	216.417	200.143	197.563	193.92
Solyc01g009430.2.1	1.99429	2.85622	2.82779	3.9884	3.5114	4.47491	3.78375	3.73823	3.07817	4.0536
Solyc01g009440.1.1	0	0.0408031	0	0	0	0.0508513	0	0	0.046639	0
Solyc01g009450.2.1	52.2335	52.3912	49.7789	48.3192	52.4644	53.9532	55.3374	55.658	48.9709	47.525
Solyc01g009460.2.1	0	0	0	0	0	0	0	0	0	0
Solyc01g009470.1.1	0	0.0408031	0.048755	0.0916873	0.0516382	0.0508513	0	0.0593369	0	0.139779
Solyc01g009480.2.1	0	0	0	0	0	0	0	0	0	0
Solyc01g009490.1.1	0	0	0	0	0	0	0	0	0	0
Solyc01g009500.2.1	3.22482	2.36658	3.31534	3.07153	2.53027	2.79682	3.17565	2.90751	2.70506	3.54108
Solyc01g009510.1.1	0	0	0	0	0	0	0	0	0	0
Solyc01g009520.2.1	210.207	202.628	197.945	195.752	143.812	152.249	204.525	205.365	223.727	221.504
Solyc01g009530.1.1	0	0	0	0	0	0.0508513	0	0	0.046639	0.0465931
Solyc01g009540.1.1	0	0	0	0	0	0	0	0	0	0
Solyc01g009550.1.1	0.127295	0.367228	0.0975101	0.137531	0.154915	0.152554	0.270268	0.118674	0.046639	0.0465931
Solyc01g009560.1.1	0	0	0	0	0	0	0	0	0	0
Solyc01g009570.2.1	0.509181	0.530441	0.731325	0.595968	0.619658	0.610215	0.337835	0.296685	0.326473	0.186372
Solyc01g009580.1.1	0	0	0	0	0	0	0	0	0	0
Solyc01g009590.2.1	0	0	0	0	0	0	0	0	0	0
Solyc01g009600.2.1	0	0	0	0	0	0	0.067567	0	0	0
Solyc01g009610.2.1	15.6998	14.8523	14.3827	14.1199	14.9234	15.3571	13.1756	14.4189	13.3854	12.9995
Solyc01g009620.2.1	44.8504	43.2513	37.8339	36.7208	41.5687	37.274	35.8105	37.857	36.7982	35.038
Solyc01g009630.2.1	43.7896	42.0272	37.4439	37.2251	46.2678	44.1898	35.27	33.8814	33.9998	33.3141
Solyc01g009640.1.1	0	0	0	0	0	0	0	0	0	0
Solyc01g009650.1.1	0	0	0	0	0	0	0	0	0	0
Solyc01g009660.1.1	0	0	0	0	0	0	0	0	0	0
Solyc01g009670.2.1	11.9658	11.5473	10.5311	10.5899	9.96617	9.8143	9.32424	9.73126	11.1001	11.0426
Solyc01g009680.2.1	0	0	0	0	0	0	0	0	0	0
Solyc01g009690.1.1	0	0	0.048755	0	0	0	0	0	0	0
Solyc01g009700.1.1	0.0424318	0	0	0	0	0	0	0	0	0
Solyc01g009710.1.1	0	0	0	0	0	0	0	0	0	0
Solyc01g009720.1.1	1.69727	1.3057	1.4139	1.60453	1.29095	1.47469	1.55404	0.830717	1.44581	1.49098
Solyc01g009730.1.1	0	0.0408031	0	0	0	0	0	0	0	0
Solyc01g009740.1.1	0	0	0	0	0	0	0	0	0	0
Solyc01g009750.2.1	99.5874	98.7844	85.5651	87.2864	104.103	105.822	103.648	100.932	104.378	107.77
Solyc01g009760.2.1	4.07345	4.12112	3.85165	3.89671	2.63355	2.39001	2.29728	3.14486	2.70506	2.74899
Solyc01g009770.2.1	22.1918	21.1768	20.1358	18.7959	19.261	18.6116	17.3647	15.665	21.314	21.2465
Solyc01g009780.2.1	9.75931	10.3232	9.55599	10.4065	11.9284	11.5941	8.04047	9.9686	10.3072	10.5766
Solyc01g009790.1.1	0	0	0	0	0	0	0	0	0	0
Solyc01g009800.1.1	0	0	0	0	0	0	0	0	0	0
Solyc01g009810.2.1	0	0	0	0	0	0	0	0	0	0
Solyc01g009820.2.1	37.4673	37.7021	44.5621	42.3137	35.2172	38.4944	30.8781	30.1432	29.8023	28.4218
Solyc01g009830.2.1	0	0	0	0	0	0	0	0	0	0
Solyc01g009840.1.1	0.0848636	0.0816063	0	0	0	0	0	0	0	0
Solyc01g009850.2.1	80.3658	80.219	68.1108	68.7197	60.1068	62.7505	84.4587	77.9094	83.204	81.6311
Solyc01g009860.2.1	12.3476	12.0369	13.0663	14.4866	9.70798	10.272	9.59451	8.95988	8.20846	8.7595
Solyc01g009870.2.1	0	0	0	0.0916873	0	0	0	0	0.046639	0
Solyc01g009880.2.1	0	0	0	0	0	0	0	0	0	0
Solyc01g009890.1.1	0	0.244819	0.19502	0.275062	0.0516382	0	0	0	0.186556	0
Solyc01g009900.2.1	0.72134	0.734456	0.926346	0.825186	0.309829	0.203405	0.202701	0.178011	0.139917	0.139779
Solyc01g009910.1.1	0.169727	0.163213	0.243775	0.412593	0.154915	0.0508513	0	0.237348	0	0
Solyc01g009920.1.1	0	0	0	0	0	0	0	0	0	0
Solyc01g009930.1.1	0	0	0	0	0	0	0	0	0	0
Solyc01g009940.1.1	0.0848636	0.0408031	0.0975101	0.137531	0.0516382	0.0508513	0	0.0593369	0	0.0465931
Solyc01g009950.1.1	0	0	0	0.0458437	0	0.0508513	0	0	0	0
Solyc01g009960.2.1	0	0	0	0	0	0	0	0	0	0
Solyc01g009970.2.1	6.83152	6.32449	5.36305	6.37227	7.64245	5.59364	8.64857	8.06982	7.4156	7.45489
Solyc01g009980.1.1	0.212159	0.163213	0.146265	0.137531	0.0516382	0.0508513	0.135134	0	0.186556	0.0465931
Solyc01g009990.2.1	139.388	136.323	139.049	140.832	102.605	101.448	152.296	155.759	141.269	140.385
Solyc01g010000.2.1	4.83722	5.87565	4.48546	4.81359	3.35648	3.35618	5.54049	5.16231	7.27568	7.36171
Solyc01g010010.1.1	0	0	0	0	0	0	0	0	0	0
Solyc01g010020.2.1	7.25583	7.38537	7.16699	6.60149	8.31375	8.0345	2.90538	3.61955	2.93826	3.54108
Solyc01g010030.2.1	50.409	50.0246	56.0683	55.5167	56.4922	57.3602	59.6616	59.2183	61.4702	59.4528
Solyc01g010040.2.1	0	0	0	0	0	0	0	0	0	0
Solyc01g010050.2.1	0	0	0	0	0	0	0	0	0	0
Solyc01g010060.2.1	1.10323	0.775259	0.731325	0.916873	1.44587	1.11873	0.405402	0.77138	0.746224	0.978455
Solyc01g010070.1.1	0	0	0	0	0	0	0	0	0	0
Solyc01g010080.2.1	0	0.0408031	0	0	0	0	0	0	0.046639	0
Solyc01g010090.1.1	0	0	0	0	0	0	0	0	0	0
Solyc01g010100.1.1	0	0	0	0	0	0	0	0	0	0
Solyc01g010110.1.1	0.0424318	0.0408031	0	0	0	0.0508513	0.067567	0	0	0.0465931
Solyc01g010120.1.1	0	0	0	0	0	0	0	0	0	0
Solyc01g010130.2.1	33.8181	40.6807	41.2955	42.818	60.3134	62.2928	125.134	130.779	152.136	149.191
Solyc01g010140.1.1	0	0	0	0	0	0	0	0	0	0.0465931
Solyc01g010150.2.1	95.4291	95.1121	108.626	103.102	180.785	169.386	314.524	310.688	334.122	332.255
Solyc01g010160.2.1	0	0	0	0	0	0.0508513	0.067567	0	0	0.0465931
Solyc01g010170.1.1	0	0	0	0	0	0	0	0	0	0
Solyc01g010180.2.1	5.601	5.2228	4.77799	4.17177	5.0089	5.39024	4.66212	5.69635	3.8244	4.14679
Solyc01g010190.2.1	3.52184	2.85622	3.31534	3.43828	3.30484	3.55959	4.25672	3.26353	3.87104	3.96041
Solyc01g010200.2.1	0.72134	0.65285	0.877591	0.687655	0.361467	0.762769	1.28377	1.1274	0.839502	1.30461
Solyc01g010210.1.1	0	0	0	0	0	0	0	0	0	0
Solyc01g010220.2.1	2.97022	3.59068	1.46265	1.97128	2.27208	2.84767	3.91888	4.03491	4.47734	3.63426
Solyc01g010230.2.1	0.0424318	0	0	0	0.0516382	0.0508513	0	0	0	0.0465931
Solyc01g010240.2.1	4.37047	4.93718	4.04667	4.12593	2.27208	1.57639	0.202701	0.356022	0	0
Solyc01g010250.2.1	2.63077	3.18264	3.9004	4.58437	7.59081	7.11918	4.39185	2.43281	2.00548	1.77054
Solyc01g010260.2.1	0	0	0	0	0	0	0	0	0	0
Solyc01g010270.2.1	30.3387	29.9903	26.7665	28.744	26.9035	29.0361	28.1754	31.3299	21.6405	24.6477
Solyc01g010280.2.1	0.0424318	0	0.19502	0.137531	0.516382	0.305108	0.067567	0	0	0
Solyc01g010290.2.1	12.1355	11.0985	10.4336	9.67302	15.7496	16.5775	16.8242	14.3002	11.1934	11.4619
Solyc01g010300.1.1	0	0	0	0.0458437	0	0	0	0	0	0
Solyc01g010310.2.1	141.298	138.812	131.59	135.514	128.734	127.332	133.58	136.475	137.772	138.941
Solyc01g010320.1.1	0	0	0	0	0	0	0	0	0	0
Solyc01g010330.1.1	0	0	0	0	0	0	0	0	0	0
Solyc01g010340.1.1	0	0	0	0	0	0	0	0	0	0
Solyc01g010350.2.1	0.127295	0.0816063	0.0975101	0.0458437	0.258191	0.101703	0	0.118674	0	0.0465931
Solyc01g010360.2.1	0	0	0	0	0	0	0	0	0	0
Solyc01g010370.2.1	22.701	22.8906	23.9875	23.1969	22.8757	21.8152	23.3106	20.7679	21.0342	21.759
Solyc01g010380.2.1	0	0	0	0	0	0	0	0	0	0
Solyc01g010390.2.1	2.97022	3.8763	5.02177	4.44684	3.14993	2.23746	4.12159	3.44154	2.89162	2.74899
Solyc01g010400.1.1	0	0	0	0	0	0	0	0	0	0
Solyc01g010410.2.1	0.339454	0.367228	0.731325	0.366749	0.258191	0.254256	0.743237	0.652706	0.233195	0.326152
Solyc01g010420.2.1	0	0	0	0	0	0	0	0	0	0
Solyc01g010430.2.1	0.551613	0.571244	0.828836	0.50428	0.361467	0.355959	0.337835	0.652706	0.559668	0.232965
Solyc01g010440.2.1	145.456	146.116	166.45	165.358	180.94	181.946	187.633	186.971	175.269	175.143
Solyc01g010450.1.1	0	0	0	0	0	0	0	0	0	0
Solyc01g010460.2.1	6.83152	7.18135	8.09334	5.86799	5.73184	6.25471	5.40536	5.51833	5.68996	5.49798
Solyc01g010470.2.1	9.41986	8.32384	8.19085	7.70174	9.19159	8.28876	7.63507	8.24783	7.13577	5.87073
Solyc01g010480.2.1	0.0424318	0.0816063	0.341285	0.275062	0.0516382	0.101703	0.337835	0.356022	0.093278	0.0931862
Solyc01g010490.2.1	0	0	0	0	0	0	0	0	0	0
Solyc01g010500.1.1	0	0	0	0	0	0	0	0	0	0
Solyc01g010510.2.1	4.20075	4.12112	4.43671	4.76774	3.87286	3.71214	4.66212	6.23038	4.38406	4.42634
Solyc01g010520.2.1	34.1152	35.9476	34.6161	35.7122	35.5787	37.8334	38.5807	41.0018	35.0725	35.038
Solyc01g010530.1.1	0	0	0	0	0	0.0508513	0	0	0	0
Solyc01g010540.2.1	153.688	152.93	143.974	136.339	122.847	119.704	176.553	161.1	202.553	193.781
Solyc01g010550.1.1	0	0	0.0975101	0.0916873	0.103276	0	0	0	0	0
Solyc01g010570.2.1	12.9417	13.7507	12.5788	12.1027	11.6702	13.7807	11.2161	11.1553	11.5198	10.1573
Solyc01g010580.2.1	231.041	259.957	214.668	216.566	222.87	228.017	267.295	279.002	305.252	298.895
Solyc01g010590.2.1	34.497	34.6419	34.3723	34.4744	28.2461	28.1208	33.7159	33.1693	32.8338	32.5686
Solyc01g010600.2.1	0.424318	0.163213	1.02386	0.458437	0.464744	0.610215	0.67567	0.534032	0.93278	1.21142
Solyc01g010610.1.1	0	0	0	0	0	0	0	0	0	0
Solyc01g010630.1.1	0	0	0	0	0.0516382	0	0	0	0	0
Solyc01g010640.2.1	11.2444	11.9961	10.7261	11.3234	12.8063	14.1367	11.7567	12.8168	11.8463	10.7164
Solyc01g010650.2.1	23.7194	23.013	23.1099	24.4805	33.3066	30.2057	23.6484	20.5899	20.3812	20.268
Solyc01g010660.2.1	25.4591	28.4398	29.253	28.4231	29.1239	26.7986	24.7295	22.548	24.9985	25.2069
Solyc01g010670.1.1	0	0	0	0	0	0	0	0	0	0
Solyc01g010680.1.1	0	0	0	0	0	0	0	0.0593369	0	0
Solyc01g010690.1.1	0	0	0	0	0	0	0	0	0	0
Solyc01g010700.2.1	3.64913	3.38666	3.3641	2.70478	2.63355	3.45789	2.09458	3.44154	1.63236	1.67735
Solyc01g010710.2.1	0.297022	0.448834	0.341285	0.183375	0.103276	0.305108	3.78375	2.31414	1.72564	1.77054
Solyc01g010720.2.1	0	0.0408031	0.0975101	0.183375	0.309829	0	1.0135	0.890054	0.326473	0.465931
Solyc01g010730.1.1	0	0.0816063	0	0	0	0	0	0.0593369	0.139917	0.139779
Solyc01g010740.2.1	0.0848636	0.0408031	0	0	0	0	0	0	0.046639	0
Solyc01g010750.2.1	139.431	136.894	137.587	134.872	169.167	176.149	159.526	160.862	160.951	167.083
Solyc01g010760.2.1	284.038	280.113	268.494	268.736	245.746	244.29	322.835	323.683	314.44	303.647
Solyc01g010770.2.1	0.254591	0.204016	0.341285	0.275062	0.361467	0.355959	0.337835	0.534032	0.606307	0.512524
Solyc01g010780.2.1	72.134	71.9359	67.7207	67.436	77.1474	78.1076	53.6482	53.9966	57.366	56.7038
Solyc01g010790.1.1	0	0	0	0	0	0	0	0	0	0
Solyc01g010800.1.1	0	0	0	0	0	0	0	0	0	0
Solyc01g010810.2.1	23.1253	24.1555	22.9149	23.7012	19.1061	20.5439	28.3106	28.1257	22.8531	21.7124
Solyc01g010820.2.1	71.243	68.4268	72.7913	70.8743	71.4672	69.056	74.3912	76.3073	79.7993	73.5239
Solyc01g010830.2.1	11.499	11.7105	11.7012	11.8735	12.5481	12.7128	16.2836	16.6737	14.5514	15.1428
Solyc01g010840.1.1	0	0	0	0	0	0	0	0	0	0
Solyc01g010850.1.1	0	0	0	0	0	0	0	0	0	0
Solyc01g010860.2.1	8.01961	9.22151	7.11823	7.70174	9.34651	8.33961	7.70264	7.65446	6.80929	6.94237
Solyc01g010870.2.1	61.2291	64.5506	62.2114	59.3217	57.3184	59.1909	47.7699	47.1729	51.0697	51.4854
Solyc01g010880.2.1	15.3179	16.6069	18.3319	16.6413	22.8757	23.2899	14.662	14.2409	14.1783	12.7199
Solyc01g010890.2.1	0	0	0	0	0	0	0	0	0	0
Solyc01g010900.2.1	0	0	0	0	0	0	0	0	0	0
Solyc01g010910.1.1	1.01836	0.530441	1.07261	1.10025	0.361467	0.813621	0.135134	0.118674	0.233195	0.139779
Solyc01g010920.1.1	4.11588	4.20272	3.60787	4.30931	5.62856	5.08513	3.71618	4.03491	4.80382	4.19338
Solyc01g010930.2.1	5.601	5.83485	7.31325	6.37227	6.19658	7.01748	6.41886	5.93369	6.01643	7.08215
Solyc01g010940.2.1	23.9315	25.7468	23.2074	23.9304	18.4865	18.1539	22.9052	21.3613	25.325	22.3181
Solyc01g010950.2.1	13.663	13.1386	13.9927	13.203	18.7963	19.0184	16.2836	14.4782	11.8929	12.4869
Solyc01g010960.1.1	17.3546	17.0149	21.8423	21.5465	10.3793	10.1703	15.4728	10.384	25.7914	24.6943
Solyc01g010970.2.1	39.801	39.4158	41.8318	41.947	56.9053	56.2924	72.2967	72.9844	49.8104	49.9478
Solyc01g010980.1.1	0	0	0	0	0	0	0	0	0	0
Solyc01g010990.2.1	9.46229	9.05829	10.6774	11.3234	12.3415	10.4245	9.79721	9.3159	8.4883	9.4118
Solyc01g011000.2.1	318.493	315.775	288.435	281.388	190.545	189.472	326.686	322.852	339.765	338.545
Solyc01g011010.2.1	0	0	0	0	0	0	0	0	0	0
Solyc01g011020.1.1	0	0	0	0	0	0	0	0	0	0
Solyc01g011030.2.1	26.3077	24.4819	25.1088	26.8644	27.8846	26.6461	29.6619	27.473	24.3922	23.9954
Solyc01g011040.2.1	74.3405	72.9152	71.1823	71.5161	59.797	59.14	69.1886	63.8465	64.9681	63.2734
Solyc01g011050.2.1	0	0	0	0	0	0	0	0	0	0
Solyc01g011060.1.1	0.0848636	0.0408031	0.0975101	0	0.103276	0.0508513	0	0.237348	0	0.0465931
Solyc01g011070.1.1	0.0848636	0.122409	0.0975101	0.0916873	0.154915	0.305108	0.067567	0.356022	0.139917	0.0931862
Solyc01g011080.2.1	0.933499	0.775259	0.48755	0.595968	1.18768	2.03405	1.28377	0.949391	1.11934	1.11823
Solyc01g011090.2.1	7.93474	6.93653	7.50828	6.92239	7.53917	7.57684	5.20266	5.39966	5.5034	6.70941
Solyc01g011100.2.1	64.1569	65.8154	67.2819	64.5479	68.7304	66.3101	44.5942	46.8168	50.9298	51.299
Solyc01g011110.1.1	0	0	0	0	0	0	0	0	0	0
Solyc01g011130.1.1	0	0.122409	0.0975101	0.183375	0.0516382	0.101703	0.135134	0.178011	0.093278	0
Solyc01g011150.1.1	0	0	0	0	0	0	0	0	0	0
Solyc01g011170.1.1	0	0	0	0	0	0	0	0	0	0
Solyc01g011180.1.1	0.424318	0.448834	0.68257	0.366749	0.464744	0.508513	0.67567	0.178011	0.46639	0.279559
Solyc01g011190.1.1	0.46675	0.204016	0.39004	0.320906	0	0.305108	0.202701	0	0.186556	0.139779
Solyc01g011200.2.1	3.52184	3.71308	2.48651	2.42971	2.78846	2.54256	3.17565	2.49215	2.84498	2.65581
Solyc01g011220.1.1	3.734	4.32513	4.3392	4.08009	5.16382	4.57662	3.24321	3.91624	4.38406	5.03205
Solyc01g011230.2.1	1.52754	1.22409	1.51141	1.60453	1.85897	2.54256	1.41891	1.95812	1.53909	1.39779
Solyc01g011240.1.1	0	0	0	0	0	0	0	0	0	0
Solyc01g011250.1.1	0	0	0	0	0	0	0	0	0	0
Solyc01g011260.1.1	0	0.122409	0	0	0.0516382	0.0508513	0.067567	0	0	0
Solyc01g011270.1.1	0	0	0	0	0	0	0	0	0	0
Solyc01g011280.1.1	0	0	0	0	0	0	0	0	0	0
Solyc01g011290.1.1	0	0	0	0	0	0	0	0	0	0
Solyc01g011300.1.1	0.0848636	0.163213	0.146265	0.183375	0.413105	0.40681	0.405402	0.178011	0.373112	0.186372
Solyc01g011310.1.1	0.169727	0.0816063	0.048755	0.137531	0.206553	0.152554	0.067567	0.118674	0.139917	0.0931862
Solyc01g011320.1.1	0.127295	0.0816063	0.048755	0.137531	0.154915	0.254256	0.135134	0.178011	0.186556	0.139779
Solyc01g011330.1.1	0.169727	0.0816063	0.19502	0.137531	0.206553	0.152554	0.135134	0.237348	0.233195	0.326152
Solyc01g011340.2.1	58.471	57.7772	57.921	57.8547	54.943	57.3094	61.4184	61.1764	54.1479	52.6502
Solyc01g011350.2.1	30.2114	30.684	28.863	29.2483	29.6403	30.3074	25.6079	26.8796	23.4594	21.9919
Solyc01g011370.1.1	0	0	0	0	0	0	0	0	0	0
Solyc01g011390.2.1	0	0	0	0	0	0	0	0	0	0
Solyc01g011400.1.1	0	0	0	0	0.0516382	0.0508513	0	0	0.046639	0
Solyc01g011410.1.1	1.867	1.67293	0.48755	0.595968	0.619658	0.711918	1.14864	0.712043	0.792863	0.652303
Solyc01g011420.1.1	0	0	0	0	0	0	0	0	0	0
Solyc01g011430.2.1	0.127295	0	0	0	0.103276	0.152554	0.270268	0.178011	0.279834	0.279559
Solyc01g011450.1.1	0.381886	0.285622	0.0975101	0.229218	0.206553	0.711918	0.608103	0.415359	0.186556	0.232965
Solyc01g011460.1.1	0	0	0	0	0	0	0	0	0	0
Solyc01g011470.1.1	0	0	0.0975101	0	0	0	0	0.0593369	0.046639	0.0931862
Solyc01g011480.1.1	0	0	0	0	0	0	0	0	0	0
Solyc01g011490.1.1	0	0	0	0	0	0	0	0	0	0
Solyc01g011500.1.1	0	0	0	0	0	0	0	0	0	0
Solyc01g011510.2.1	0.975931	0.734456	0.68257	0.550124	0.258191	0.864472	0.135134	0.415359	0.186556	0.465931
Solyc01g011520.1.1	0	0	0	0	0	0	0	0	0	0
Solyc01g011530.1.1	0	0	0	0	0	0	0	0	0	0
Solyc01g011540.1.1	0	0	0	0	0	0	0	0	0	0
Solyc01g012540.1.1	0	0	0	0	0	0	0	0	0	0
Solyc01g012550.1.1	0	0	0	0	0	0	0	0	0	0
Solyc01g012560.1.1	0	0	0	0	0	0	0	0	0	0
Solyc01g012570.1.1	0	0	0	0	0	0	0	0	0	0
Solyc01g012580.1.1	0	0	0	0	0	0	0	0	0	0
Solyc01g012590.1.1	0	0	0	0	0	0	0	0	0	0
Solyc01g012600.1.1	0	0	0	0	0	0	0	0	0	0
Solyc01g012610.1.1	0	0	0	0	0	0	0	0	0	0
Solyc01g012620.1.1	0	0	0	0	0	0	0	0	0	0
Solyc01g012630.1.1	0	0	0	0	0	0	0	0	0	0
Solyc01g012640.1.1	0	0	0	0	0	0	0	0	0	0
Solyc01g012650.1.1	0	0	0	0	0	0	0	0	0	0
Solyc01g012660.1.1	0	0	0	0	0	0	0	0	0	0
Solyc01g012670.1.1	0	0	0	0	0	0	0	0	0	0
Solyc01g012680.1.1	0	0	0	0	0	0	0	0	0	0
Solyc01g012690.1.1	0	0	0	0	0	0	0	0	0	0
Solyc01g012700.2.1	0	0	0	0	0.0516382	0.101703	0	0	0	0
Solyc01g012710.1.1	0	0	0	0	0	0	0	0	0	0
Solyc01g012720.1.1	0	0	0	0	0	0	0	0	0	0
Solyc01g012730.1.1	0	0	0	0	0	0	0	0	0	0
Solyc01g012740.1.1	0	0	0	0	0	0	0	0	0	0
Solyc01g012750.1.1	0	0	0	0	0	0	0	0	0	0
Solyc01g012760.1.1	0.127295	0.0816063	0.048755	0	0.258191	0	0.067567	0.0593369	0	0.0465931
Solyc01g013760.1.1	0	0	0	0	0	0	0	0	0	0
Solyc01g013770.1.1	0	0	0	0	0	0	0	0	0	0
Solyc01g013780.1.1	0	0	0	0	0	0	0	0	0	0
Solyc01g013790.1.1	0	0	0	0	0	0	0	0	0	0
Solyc01g013800.1.1	0	0	0	0	0	0	0	0	0	0
Solyc01g013810.1.1	0	0	0	0	0	0	0	0	0	0
Solyc01g013820.1.1	0	0	0	0	0	0	0	0	0	0
Solyc01g013830.1.1	0	0	0	0	0	0	0	0	0	0
Solyc01g013840.1.1	0	0	0	0	0	0	0	0	0	0
Solyc01g013850.1.1	0	0	0	0	0	0	0	0	0	0
Solyc01g013860.1.1	0	0	0	0	0	0	0	0	0	0
Solyc01g013870.1.1	0	0	0	0	0	0	0	0	0	0
Solyc01g013880.1.1	0	0	0	0	0	0	0	0	0	0
Solyc01g013890.1.1	0	0	0.048755	0	0.0516382	0	0	0	0	0
Solyc01g013900.2.1	0.0848636	0.122409	0.146265	0	0.0516382	0.0508513	0	0.0593369	0	0
Solyc01g013910.1.1	0	0	0	0	0	0	0	0	0	0
Solyc01g013920.1.1	0	0	0	0	0	0	0	0	0	0
Solyc01g013930.1.1	0	0	0	0	0	0	0	0	0	0
Solyc01g013940.1.1	0	0	0	0	0	0	0	0	0	0
Solyc01g013950.1.1	0	0	0	0	0	0	0	0	0	0
Solyc01g013960.1.1	0	0	0	0	0	0	0	0	0	0
Solyc01g013970.1.1	0	0	0	0	0	0	0	0	0	0
Solyc01g013980.1.1	0	0	0	0	0	0	0	0	0	0
Solyc01g013990.1.1	0	0	0	0	0	0	0	0	0	0
Solyc01g014000.1.1	0	0	0	0	0	0	0	0	0	0
Solyc01g014010.1.1	0	0	0	0	0	0	0	0	0	0.0465931
Solyc01g014020.1.1	0	0	0	0	0	0	0	0	0	0
Solyc01g014030.1.1	0	0	0	0	0	0	0	0	0	0
Solyc01g014040.1.1	0	0	0	0	0	0	0	0	0	0
Solyc01g014050.1.1	0	0	0	0	0	0	0	0	0	0
Solyc01g014060.1.1	0	0	0	0	0	0	0	0	0	0
Solyc01g014070.1.1	0	0	0	0	0	0	0	0	0	0
Solyc01g014080.1.1	0	0	0	0	0	0	0	0	0	0
Solyc01g014090.1.1	0.127295	0.0408031	0.0975101	0	0.103276	0.101703	0	0.178011	0.046639	0.0465931
Solyc01g014100.2.1	0.169727	0.0816063	0	0.0916873	0.206553	0.0508513	0.135134	0.474695	0.279834	0.232965
Solyc01g014110.2.1	1.06079	0.979275	1.12137	0.962717	1.18768	0.966174	0.810804	1.06806	0.559668	1.07164
Solyc01g014120.2.1	1.01836	0.489638	1.07261	0.87103	0.671296	0.966174	0.540536	0.712043	0.46639	0.652303
Solyc01g014130.1.1	0	0	0	0	0	0	0	0	0	0
Solyc01g014140.2.1	0	0	0	0	0	0	0	0	0.093278	0.0931862
Solyc01g014150.1.1	0	0	0	0	0	0.0508513	0.135134	0	0	0
Solyc01g014160.1.1	0	0	0	0	0	0	0	0	0.046639	0
Solyc01g014170.1.1	0	0	0	0	0	0	0	0	0	0
Solyc01g014180.2.1	148.723	147.299	149.922	148.442	253.388	250.849	160.201	158.252	179.374	176.634
Solyc01g014190.1.1	0	0	0	0	0	0	0	0	0	0
Solyc01g014200.1.1	2.75807	3.30505	3.51036	3.20906	5.26709	4.88172	2.83781	3.38221	3.49792	3.91382
Solyc01g014210.1.1	0.0424318	0.0408031	0.048755	0	0	0	0	0	0	0
Solyc01g014220.1.1	0.297022	0.204016	0.19502	0.366749	0.413105	0.101703	0.202701	0.178011	0.186556	0.139779
Solyc01g014230.2.1	21.2583	19.3407	21.9398	22.5092	21.9979	20.5948	18.4458	17.089	18.0959	18.1713
Solyc01g014240.1.1	0	0	0	0	0	0	0	0	0	0
Solyc01g014250.2.1	0.0424318	0	0	0	0	0	0.135134	0.178011	0.139917	0.139779
Solyc01g014260.1.1	0	0	0	0	0	0	0	0	0	0
Solyc01g014270.2.1	0	0	0	0	0	0.0508513	0.067567	0.118674	0.046639	0
Solyc01g014280.2.1	7.46799	6.5693	4.53422	4.03424	5.37037	5.23768	5.87833	5.51833	3.03153	2.56262
Solyc01g014290.1.1	0.381886	0.489638	0.48755	0.275062	0.516382	0.355959	0.472969	0.356022	0.186556	0.0465931
Solyc01g014300.1.1	0	0	0	0.0458437	0	0	0	0	0	0
Solyc01g014310.1.1	0	0	0.0975101	0.0458437	0	0.152554	0.067567	0.0593369	0.139917	0.0931862
Solyc01g014320.2.1	0	0	0	0	0	0	0	0	0	0
Solyc01g014330.2.1	0	0	0	0	0	0	0	0	0	0
Solyc01g014340.1.1	0	0	0	0	0	0	0	0	0	0
Solyc01g014350.1.1	0	0	0	0	0	0	0	0	0	0
Solyc01g014360.1.1	0	0	0	0	0	0	0	0	0	0
Solyc01g014370.1.1	0	0	0.048755	0	0	0	0	0.118674	0.046639	0.0465931
Solyc01g014380.2.1	0.339454	0.448834	0.68257	0.641811	0.722934	0.711918	0.472969	0.593369	0.373112	0.186372
Solyc01g014390.2.1	0	0	0.0975101	0	0.0516382	0	0	0	0	0
Solyc01g014400.1.1	0	0	0	0	0	0	0	0	0	0
Solyc01g014410.1.1	0	0	0	0	0	0	0	0	0	0
Solyc01g014420.1.1	0	0	0	0	0	0	0	0	0	0
Solyc01g014430.1.1	0	0	0	0	0	0	0	0	0	0
Solyc01g014440.1.1	0	0	0	0	0	0	0	0	0	0
Solyc01g014450.1.1	0	0	0	0	0	0	0	0	0	0
Solyc01g014460.1.1	0	0	0	0	0	0	0	0	0	0
Solyc01g014470.1.1	0.127295	0.0816063	0.146265	0.0916873	0	0.203405	0.202701	0.237348	0.093278	0.139779
Solyc01g014480.2.1	25.2469	23.829	24.67	25.6725	21.2233	23.1882	19.7971	19.8779	21.0808	19.7555
Solyc01g014490.2.1	65.0904	63.8569	57.4334	58.8633	60.1585	61.7335	44.8645	44.1467	44.9133	41.8406
Solyc01g014500.1.1	0	0	0	0	0	0	0	0	0	0
Solyc01g014510.1.1	0.127295	0.163213	0.0975101	0.275062	0.206553	0.355959	0.202701	0.118674	0.046639	0.186372
Solyc01g014520.1.1	0.169727	0.244819	0.341285	0.275062	0.309829	0.508513	0.743237	0.296685	0.46639	0.279559
Solyc01g014530.2.1	0.0848636	0.0408031	0.048755	0.0916873	0.0516382	0	0.067567	0.118674	0.139917	0.0465931
Solyc01g014540.1.1	0	0	0	0.0458437	0	0	0	0.0593369	0	0
Solyc01g014550.1.1	0.0424318	0.0408031	0.048755	0	0	0	0	0.0593369	0	0
Solyc01g014560.2.1	0.297022	0.0816063	0.341285	0.183375	0.103276	0.203405	0.405402	0.415359	0.279834	0.0465931
Solyc01g014570.1.1	0	0	0	0	0.0516382	0	0.067567	0	0	0
Solyc01g014580.1.1	0	0	0	0	0	0	0	0	0	0
Solyc01g014600.1.1	0	0	0	0	0	0	0	0	0	0
Solyc01g014610.1.1	0	0	0	0	0	0	0	0	0	0
Solyc01g014620.1.1	1.90943	1.3465	1.80394	2.24634	2.11716	2.23746	1.35134	1.30541	2.42523	1.02505
Solyc01g014630.1.1	0	0	0	0	0	0	0	0	0	0
Solyc01g014640.1.1	0	0	0	0	0	0	0	0	0	0
Solyc01g014650.1.1	0	0	0	0	0	0	0	0	0	0
Solyc01g014660.1.1	0	0	0	0	0	0	0	0	0	0
Solyc01g014670.1.1	0	0	0	0	0	0	0	0	0	0
Solyc01g014680.1.1	0	0	0	0	0	0	0	0	0	0
Solyc01g014690.2.1	0	0	0	0	0	0	0	0	0	0
Solyc01g014700.2.1	0	0	0	0.0458437	0	0	0	0	0.046639	0
Solyc01g014710.1.1	0	0	0.048755	0	0	0	0.067567	0	0.046639	0.0465931
Solyc01g014720.1.1	0	0	0	0	0	0	0	0	0	0
Solyc01g014730.1.1	0	0	0	0	0	0	0	0	0	0.0465931
Solyc01g014740.1.1	0	0	0	0	0	0	0	0	0	0
Solyc01g014760.1.1	0	0	0	0	0	0	0	0	0	0
Solyc01g014770.1.1	0	0	0	0	0	0	0	0	0	0
Solyc01g014780.1.1	0	0	0	0	0	0	0	0	0	0
Solyc01g014790.1.1	0	0	0	0	0	0	0	0	0	0
Solyc01g014800.1.1	0	0	0	0	0	0	0	0	0	0
Solyc01g014820.1.1	0	0	0	0	0.0516382	0	0	0	0	0
Solyc01g014830.1.1	0.169727	0.122409	0.048755	0.0458437	0	0	0	0.118674	0.046639	0.0465931
Solyc01g014840.2.1	1.90943	1.63213	3.12032	3.07153	1.80734	1.42384	2.63511	2.78884	3.17145	3.4013
Solyc01g014850.2.1	53.8035	54.0233	56.5071	59.4134	53.9619	58.123	67.4994	69.1869	65.4811	70.2624
Solyc01g014860.2.1	0	0	0	0	0	0	0	0	0	0
Solyc01g014870.1.1	0	0	0	0	0	0.0508513	0	0	0	0
Solyc01g014880.2.1	0	0	0	0	0	0	0	0	0	0
Solyc01g014890.1.1	0	0	0	0	0	0	0	0	0	0
Solyc01g014900.1.1	0	0	0	0	0	0	0	0	0	0
Solyc01g014910.1.1	0	0	0	0	0	0	0	0	0	0
Solyc01g014920.1.1	0	0	0	0	0	0	0	0	0	0
Solyc01g014930.1.1	0	0	0	0	0	0	0	0	0	0.0465931
Solyc01g014940.1.1	0	0	0	0	0	0	0	0	0	0
Solyc01g014950.1.1	0	0	0	0	0	0	0	0	0	0
Solyc01g014960.1.1	0	0	0	0	0	0	0	0	0	0
Solyc01g014970.1.1	0	0	0	0	0	0	0	0	0	0
Solyc01g014980.2.1	0	0.0816063	0.048755	0	0.0516382	0.0508513	0	0	0.139917	0.0465931
Solyc01g014990.1.1	0.0848636	0.0408031	0.29253	0.0458437	0.154915	0.0508513	0.067567	0	0.186556	0.0465931
Solyc01g015000.2.1	5.38884	5.05959	6.09438	5.31787	5.21546	4.67832	6.21616	5.16231	5.59668	4.42634
Solyc01g015010.1.1	0	0	0.048755	0.0458437	0.0516382	0.0508513	0.067567	0.237348	0.139917	0.0465931
Solyc01g015020.2.1	77.8623	77.6076	86.5402	88.57	94.756	94.0749	89.9992	94.8798	99.994	93.4657
Solyc01g015030.1.1	0	0	0	0	0	0	0	0	0	0
Solyc01g015040.1.1	0.0424318	0	0	0	0	0	0	0	0	0
Solyc01g015050.1.1	0	0	0	0	0	0	0	0	0	0
Solyc01g015060.1.1	0	0	0.048755	0	0	0	0	0	0	0
Solyc01g015070.2.1	0	0	0	0	0	0	0	0	0	0
Solyc01g015080.2.1	0	0	0	0	0	0	0	0	0	0
Solyc01g015090.1.1	0	0	0.048755	0.0458437	0	0.0508513	0	0	0	0
Solyc01g015100.1.1	0	0	0	0	0.0516382	0	0	0	0	0
Solyc01g015110.1.1	0.0848636	0.0408031	0.048755	0	0.0516382	0.0508513	0.067567	0.178011	0	0
Solyc01g015120.1.1	0	0	0	0	0	0	0	0	0	0
Solyc01g015130.1.1	0	0	0	0	0	0	0	0	0	0
Solyc01g015140.1.1	0	0	0	0	0	0	0	0	0	0
Solyc01g015150.1.1	0	0	0	0	0	0	0	0	0	0
Solyc01g015160.1.1	0	0	0	0	0	0	0	0	0	0
Solyc01g015170.1.1	0	0	0	0	0	0	0	0	0	0
Solyc01g015180.1.1	0	0	0	0	0	0	0	0	0	0
Solyc01g015190.1.1	0	0	0	0	0	0	0	0	0	0
Solyc01g015200.1.1	0	0	0	0	0	0	0	0	0	0
Solyc01g015210.1.1	0	0	0	0	0	0	0	0	0	0
Solyc01g015220.1.1	0	0	0	0	0	0	0	0	0	0
Solyc01g015230.1.1	0	0	0	0	0	0	0	0	0	0
Solyc01g015240.1.1	0.0848636	0	0	0	0.0516382	0	0.067567	0	0	0
Solyc01g015250.1.1	0.891067	0.571244	1.02386	0.87103	1.60078	1.01703	1.08107	1.36475	1.02606	0.978455
Solyc01g015260.1.1	0	0	0	0	0	0	0	0	0	0
Solyc01g015270.1.1	0	0	0	0	0	0	0	0	0	0
Solyc01g015280.1.1	0	0	0	0	0	0	0	0	0	0
Solyc01g015290.1.1	0	0	0	0	0	0	0	0	0	0
Solyc01g015300.1.1	0	0	0	0	0	0	0	0	0	0
Solyc01g016300.1.1	0	0	0	0	0	0	0	0	0	0
Solyc01g016310.1.1	0	0	0	0	0	0	0	0	0	0
Solyc01g016320.1.1	0	0	0	0	0	0	0	0	0	0
Solyc01g016330.1.1	0	0	0	0	0	0	0	0	0	0
Solyc01g016340.1.1	0	0	0	0	0	0	0	0	0	0
Solyc01g016350.1.1	0	0	0	0	0	0	0	0	0	0
Solyc01g016360.1.1	0	0	0	0	0	0	0	0	0	0
Solyc01g016370.1.1	0	0	0	0	0	0	0	0	0	0
Solyc01g016380.2.1	0.127295	0.122409	0.048755	0.229218	0	0.203405	0	0	0.093278	0
Solyc01g016390.2.1	0.0424318	0	0	0	0.0516382	0	0.067567	0	0.046639	0
Solyc01g016400.1.1	0.0424318	0	0.146265	0.137531	0.0516382	0.0508513	0.067567	0.118674	0.046639	0.0465931
Solyc01g016410.2.1	4.37047	4.61075	4.24169	4.08009	6.14494	6.15301	4.12159	4.68762	4.61726	4.93887
Solyc01g016430.1.1	0	0	0	0	0	0	0	0	0	0
Solyc01g016450.1.1	0	0	0	0	0	0	0	0	0	0
Solyc01g016460.2.1	0.678908	0.612047	0.48755	0.366749	0.516382	0.559364	1.08107	0.652706	0.513029	0.419338
Solyc01g016470.2.1	70.3519	67.7332	65.088	63.1267	52.8775	52.3768	95.4046	95.7105	101.347	108.189
Solyc01g016480.1.1	0.339454	0.367228	0.29253	0.550124	0.877849	0.457662	0.67567	0.178011	0.419751	0.60571
Solyc01g016510.1.1	0	0	0	0	0	0	0	0	0	0
Solyc01g016520.1.1	0.0424318	0	0	0	0	0	0	0	0	0
Solyc01g016530.1.1	0	0	0	0	0.0516382	0	0	0.118674	0.046639	0.0465931
Solyc01g016540.1.1	0.127295	0	0	0	0.103276	0	0.067567	0	0.046639	0
Solyc01g016550.1.1	0	0	0.048755	0	0	0	0	0	0	0
Solyc01g016560.1.1	0.0424318	0.0408031	0.048755	0.0458437	0	0	0	0	0.046639	0.0465931
Solyc01g016570.1.1	0	0	0	0	0	0	0	0	0	0
Solyc01g016580.1.1	0	0	0	0	0	0	0	0	0	0
Solyc01g016590.1.1	0	0	0	0	0.0516382	0	0	0	0	0
Solyc01g016600.1.1	0	0	0	0	0	0	0	0	0	0
Solyc01g016610.1.1	0	0	0	0	0	0	0	0	0	0
Solyc01g016620.1.1	0	0	0	0	0	0	0	0	0	0
Solyc01g016630.1.1	0	0	0.048755	0.0916873	0.0516382	0.101703	0	0	0	0.0465931
Solyc01g016640.1.1	0	0	0	0	0	0	0	0	0	0
Solyc01g016650.1.1	0	0	0	0	0	0	0	0	0	0
Solyc01g016660.1.1	1.82457	1.06088	1.85269	1.23778	2.32372	2.44086	1.55404	1.95812	1.9122	1.53757
Solyc01g016670.1.1	0	0	0	0	0	0	0	0	0	0
Solyc01g016680.1.1	0	0	0	0	0	0	0	0	0	0
Solyc01g016690.1.1	0	0	0	0	0	0	0	0	0	0
Solyc01g016700.2.1	0	0	0	0	0.0516382	0	0	0.0593369	0	0
Solyc01g016710.1.1	0	0	0	0	0	0	0	0	0	0
Solyc01g016720.2.1	0	0	0	0	0	0	0	0	0	0
Solyc01g016730.1.1	0	0	0	0	0	0	0	0	0	0
Solyc01g016740.1.1	0	0	0	0	0	0	0	0	0	0
Solyc01g016750.1.1	0	0	0	0	0	0	0	0	0	0
Solyc01g016760.1.1	0	0	0	0	0	0	0	0	0	0
Solyc01g016770.1.1	0	0	0	0	0	0	0	0	0	0
Solyc01g016780.1.1	0	0	0	0	0	0	0	0	0	0
Solyc01g016790.1.1	0	0	0	0	0	0	0	0	0	0
Solyc01g016800.1.1	0	0	0	0	0	0	0.067567	0	0	0
Solyc01g016810.1.1	0	0	0	0	0	0	0	0	0	0
Solyc01g016820.1.1	0	0	0	0	0	0	0	0	0	0
Solyc01g016830.1.1	0	0	0	0	0	0	0	0	0	0
Solyc01g016840.1.1	0	0	0	0	0	0	0	0	0	0
Solyc01g016850.1.1	0	0	0	0	0	0	0	0	0	0
Solyc01g016860.1.1	0	0	0	0	0	0	0	0	0	0
Solyc01g016870.1.1	0	0	0	0	0	0	0	0	0	0
Solyc01g016880.1.1	0	0	0	0	0	0	0	0	0	0
Solyc01g016890.1.1	0	0	0	0	0	0	0	0	0	0
Solyc01g016900.1.1	0	0	0	0	0	0	0	0	0	0
Solyc01g016910.1.1	0	0	0	0	0	0	0	0	0	0
Solyc01g016920.1.1	0	0	0	0	0	0	0	0	0	0
Solyc01g016930.1.1	0	0	0	0	0	0	0	0	0	0
Solyc01g016940.1.1	0	0	0	0	0	0	0	0	0	0
Solyc01g016950.1.1	0	0.0816063	0	0	0.0516382	0	0	0	0	0
Solyc01g016960.1.1	0	0	0	0	0	0	0	0	0	0
Solyc01g016970.1.1	0.0424318	0.0408031	0.0975101	0	0.206553	0.101703	0.270268	0.0593369	0.279834	0.326152
Solyc01g016980.1.1	0	0	0	0	0	0	0	0	0	0
Solyc01g016990.1.1	0	0	0	0	0	0	0	0	0	0
Solyc01g017000.1.1	0	0	0	0	0	0	0	0	0	0
Solyc01g017010.1.1	0	0	0	0	0	0	0	0	0	0
Solyc01g017020.1.1	0	0	0	0	0	0	0	0	0	0
Solyc01g017030.1.1	0	0	0	0	0	0	0	0	0	0
Solyc01g017040.1.1	0	0	0	0	0	0	0	0	0	0
Solyc01g017050.1.1	0.424318	0.244819	0	0	0	0	0	0.0593369	0	0
Solyc01g017060.1.1	0	0	0	0	0	0	0	0	0	0
Solyc01g017070.1.1	0	0	0	0	0	0	0	0	0	0
Solyc01g017080.1.1	0	0	0	0	0	0	0	0	0	0
Solyc01g017090.2.1	0.0424318	0	0	0.0458437	0.103276	0	0	0	0	0
Solyc01g017100.1.1	0.0848636	0.0408031	0	0	0	0.0508513	0	0	0.046639	0
Solyc01g017110.1.1	0.0424318	0	0	0	0	0	0	0	0	0
Solyc01g017120.1.1	0	0	0	0	0	0	0	0	0	0
Solyc01g017130.1.1	0	0	0	0	0	0	0	0	0	0
Solyc01g017140.1.1	0	0	0	0	0	0	0	0	0	0
Solyc01g017150.1.1	0	0	0	0	0	0	0	0	0	0
Solyc01g017160.1.1	0	0	0	0	0	0	0	0	0	0
Solyc01g017170.1.1	0	0	0	0	0	0	0	0	0	0
Solyc01g017180.1.1	0	0	0	0	0	0	0	0	0	0
Solyc01g017190.1.1	0	0	0	0	0	0	0	0	0	0
Solyc01g017200.1.1	0	0	0	0	0	0	0	0	0	0
Solyc01g017210.1.1	0	0	0	0	0	0	0	0	0	0
Solyc01g017220.1.1	0	0	0	0	0	0	0	0	0.046639	0
Solyc01g017230.1.1	0	0	0	0	0.0516382	0	0	0	0	0.0465931
Solyc01g017240.1.1	0.127295	0.0408031	0.048755	0.0916873	0.206553	0.254256	0	0.118674	0.186556	0.232965
Solyc01g017250.1.1	0	0	0	0	0	0	0	0	0	0
Solyc01g017260.1.1	0	0	0	0	0	0	0	0	0	0
Solyc01g017270.1.1	0	0	0	0	0	0	0	0	0	0
Solyc01g017280.1.1	0	0	0	0	0	0	0	0	0	0
Solyc01g017290.1.1	0	0	0	0	0	0	0	0	0	0
Solyc01g017300.1.1	0	0.0816063	0	0	0.103276	0	0.067567	0	0.046639	0.0465931
Solyc01g017310.1.1	0	0	0	0	0	0	0	0	0	0
Solyc01g017320.1.1	0.169727	0.163213	0	0	0.103276	0.0508513	0	0	0	0.0465931
Solyc01g017330.1.1	0.212159	0.367228	0.048755	0	0.154915	0	0	0	0.046639	0.0465931
Solyc01g017340.1.1	0	0	0	0	0	0	0	0	0	0.0465931
Solyc01g017350.1.1	0	0	0	0.0458437	0	0	0	0	0	0.0465931
Solyc01g017360.1.1	0	0.0408031	0	0	0	0	0	0.0593369	0.046639	0
Solyc01g017370.1.1	0	0.0408031	0.048755	0	0	0	0	0	0	0
Solyc01g017380.1.1	0	0.0408031	0.0975101	0.0458437	0	0	0	0	0	0
Solyc01g017390.1.1	0	0	0	0	0	0	0	0	0	0
Solyc01g017400.1.1	0	0	0	0	0	0.0508513	0	0	0	0
Solyc01g017410.1.1	0	0	0	0	0	0	0	0	0	0
Solyc01g017420.1.1	0.127295	0.0816063	0	0.0458437	0	0	0.067567	0	0.046639	0.0931862
Solyc01g017430.1.1	0	0	0	0	0	0	0	0	0	0
Solyc01g017440.1.1	0	0	0	0	0	0	0	0	0	0
Solyc01g017450.1.1	0	0	0	0	0	0	0	0	0	0
Solyc01g017460.1.1	0.0424318	0	0.048755	0	0	0	0	0	0	0
Solyc01g017470.1.1	0	0	0	0	0	0	0	0	0	0
Solyc01g017480.1.1	0	0	0	0	0	0	0	0	0.046639	0
Solyc01g017490.1.1	7.29827	8.36464	1.02386	0.962717	0.619658	0.254256	0.608103	0.652706	0.839502	1.44439
Solyc01g017500.1.1	0	0	0	0	0	0	0	0	0	0
Solyc01g017510.1.1	0	0	0	0	0	0	0	0	0	0
Solyc01g017520.1.1	0.0848636	0	0.048755	0	0	0	0	0	0	0
Solyc01g017530.1.1	0.0424318	0.122409	0.0975101	0.0916873	0.0516382	0	0.067567	0.0593369	0.139917	0.0931862
Solyc01g017540.1.1	0	0	0	0	0	0	0	0	0	0
Solyc01g017550.1.1	0	0	0	0	0	0	0	0	0	0
Solyc01g017560.1.1	2.12159	2.52979	2.68153	2.42971	3.2532	3.55959	3.04051	2.43281	2.42523	2.79559
Solyc01g017570.1.1	0	0	0	0	0	0	0	0	0	0
Solyc01g017580.1.1	0	0	0	0	0	0	0	0	0	0
Solyc01g017590.1.1	0	0	0	0	0	0	0	0	0	0
Solyc01g017600.2.1	0.0424318	0.0408031	0.048755	0.0916873	0.309829	0.305108	0.135134	0.0593369	0.233195	0.232965
Solyc01g017610.1.1	0	0	0	0	0	0	0	0	0	0
Solyc01g017620.1.1	0	0	0	0	0	0	0	0	0	0
Solyc01g017630.1.1	0	0	0	0	0	0	0	0	0	0
Solyc01g017640.1.1	0	0	0.048755	0	0	0	0	0	0	0
Solyc01g017650.1.1	0	0	0	0	0	0	0	0	0	0
Solyc01g017660.1.1	0	0	0	0	0	0	0	0	0	0
Solyc01g017670.1.1	0	0	0	0	0	0	0	0	0	0
Solyc01g017680.1.1	0	0	0	0	0	0	0	0	0	0
Solyc01g017690.1.1	0	0	0	0	0	0	0	0	0	0
Solyc01g017700.1.1	0	0	0	0	0	0	0	0	0	0
Solyc01g017710.1.1	0	0	0	0	0.0516382	0	0	0	0	0
Solyc01g017720.1.1	0	0	0	0	0	0	0	0	0	0
Solyc01g017730.1.1	0	0.0408031	0	0	0	0.101703	0	0	0	0
Solyc01g017740.1.1	0.551613	0.65285	0.19502	0.366749	0.56802	0.508513	0.472969	0.237348	0.373112	0.559117
Solyc01g017750.1.1	0	0	0	0	0	0	0	0	0	0
Solyc01g017760.1.1	0	0	0	0	0	0	0	0	0	0
Solyc01g017770.1.1	0	0	0	0	0	0	0	0	0	0
Solyc01g017780.1.1	0	0.0408031	0	0	0.0516382	0	0	0	0	0
Solyc01g017790.1.1	0	0	0	0	0	0	0	0	0	0
Solyc01g017800.1.1	0	0	0	0	0	0	0	0	0	0
Solyc01g017810.1.1	0	0	0	0	0	0	0	0	0	0
Solyc01g017820.1.1	0	0	0	0	0	0	0	0	0	0
Solyc01g017830.1.1	0	0	0	0	0	0	0	0	0	0
Solyc01g017840.1.1	0	0	0	0	0	0	0	0	0	0
Solyc01g017850.1.1	0.169727	0.244819	0.146265	0.183375	0.258191	0	0.135134	0.237348	0.139917	0.0465931
Solyc01g017860.2.1	1.27295	1.55052	0.926346	1.42115	1.70406	2.18661	1.14864	1.48342	2.05212	1.91032
Solyc01g017870.1.1	0	0	0	0	0.0516382	0.0508513	0	0	0	0
Solyc01g017880.1.1	0	0	0	0	0	0	0	0	0	0
Solyc01g017890.1.1	0	0	0	0	0	0	0	0	0	0
Solyc01g017900.1.1	0	0	0	0	0	0	0	0	0	0
Solyc01g017910.1.1	0	0	0	0	0	0	0	0	0	0
Solyc01g017920.1.1	0	0	0	0	0	0	0	0	0	0
Solyc01g017930.1.1	0	0	0	0	0	0	0	0	0	0
Solyc01g017940.1.1	0	0	0	0	0	0	0	0	0	0
Solyc01g017950.1.1	0	0	0	0	0	0	0	0	0	0
Solyc01g017960.1.1	0	0	0	0	0	0	0	0	0	0
Solyc01g017970.1.1	0	0	0	0	0	0	0	0	0	0
Solyc01g017980.1.1	0	0	0	0	0	0	0	0	0	0
Solyc01g017990.1.1	0	0	0	0	0	0	0	0	0	0
Solyc01g018000.1.1	0	0	0	0	0	0	0	0	0	0
Solyc01g018010.1.1	0	0	0	0	0	0	0	0	0	0
Solyc01g018020.1.1	0.0424318	0.122409	0.048755	0.183375	0.206553	0.0508513	0.067567	0.178011	0.093278	0
Solyc01g018040.1.1	0	0	0	0	0	0	0	0	0	0
Solyc01g018050.1.1	0	0	0	0	0	0	0	0	0	0
Solyc01g018060.1.1	0	0	0	0	0	0	0	0	0	0
Solyc01g018070.1.1	0	0	0	0	0	0	0	0	0	0
Solyc01g018080.1.1	0	0	0	0	0	0	0	0	0	0
Solyc01g018090.1.1	0.169727	0.204016	0.0975101	0.183375	0.258191	0.305108	0.540536	0.296685	0.139917	0.279559
Solyc01g018100.1.1	0	0	0	0	0	0	0	0	0	0
Solyc01g019100.1.1	0	0	0	0	0	0	0	0	0	0
Solyc01g020100.1.1	0	0	0	0	0	0	0	0	0	0
Solyc01g020110.1.1	0	0	0	0	0	0	0	0	0	0
Solyc01g020120.1.1	0	0.0408031	0	0.0458437	0.0516382	0.0508513	0.067567	0	0.093278	0.139779
Solyc01g020130.2.1	0.975931	0.489638	0.68257	0.50428	0.877849	0.813621	0.878371	0.77138	0.979419	0.372745
Solyc01g020140.2.1	0	0	0	0	0	0	0	0	0	0
Solyc01g020150.2.1	0	0	0	0	0	0	0	0	0.046639	0
Solyc01g020160.1.1	0	0	0	0	0	0	0	0	0	0
Solyc01g020170.1.1	0	0	0	0	0	0	0	0	0	0
Solyc01g020180.1.1	0	0	0	0	0	0	0	0	0	0
Solyc01g020190.2.1	1.78213	1.3465	2.09647	1.28362	1.49751	1.32213	0.810804	0.830717	1.39917	1.81713
Solyc01g020200.1.1	0.678908	0.775259	0.243775	0.229218	0.309829	0.152554	0.337835	0.415359	0.233195	0.0465931
Solyc01g020210.1.1	0	0	0.048755	0	0	0	0	0	0	0
Solyc01g020220.1.1	5.85559	7.46697	6.43566	5.36371	3.87286	3.40704	4.39185	5.16231	4.15087	4.33316
Solyc01g020230.2.1	3.52184	4.08031	2.09647	2.65893	2.63355	1.83065	2.77025	2.67016	1.81892	2.23647
Solyc01g020240.2.1	44.2139	47.6581	43.0019	42.0386	50.9669	48.8172	43.4456	43.2566	40.436	41.0951
Solyc01g020250.1.1	0	0	0	0	0	0	0	0	0	0
Solyc01g020260.1.1	0	0	0	0	0	0	0	0	0	0
Solyc01g020270.1.1	0	0	0.0975101	0	0	0	0.067567	0	0	0.0931862
Solyc01g020280.1.1	0	0	0	0	0	0	0	0	0	0
Solyc01g020290.1.1	0	0	0	0	0	0	0.067567	0	0.046639	0
Solyc01g020300.2.1	0	0	0	0	0	0	0	0	0	0
Solyc01g020310.1.1	0	0	0	0	0	0	0	0	0	0
Solyc01g020320.2.1	6.2799	5.01878	4.63173	4.30931	5.57692	4.93257	4.86482	4.86563	4.94373	5.26502
Solyc01g020330.2.1	0	0.0408031	0.048755	0	0	0	0	0	0	0
Solyc01g020340.1.1	0.339454	0.65285	0.48755	0.687655	0.877849	0.661067	0.540536	0.712043	0.373112	0.745489
Solyc01g020350.1.1	0	0	0.146265	0	0.0516382	0	0	0.118674	0.046639	0
Solyc01g020360.1.1	0	0	0	0	0	0	0	0	0	0
Solyc01g020370.1.1	1.48511	1.42811	1.21888	1.51284	1.39423	1.57639	1.0135	1.30541	1.02606	0.885269
Solyc01g020380.1.1	0	0.0408031	0	0	0	0.0508513	0	0	0	0
Solyc01g020390.1.1	0	0	0	0	0	0	0	0	0	0
Solyc01g020400.1.1	0	0	0	0	0	0	0	0	0	0
Solyc01g020410.1.1	0	0	0	0	0	0	0	0	0	0.0931862
Solyc01g020430.1.1	0	0	0	0	0	0	0	0	0	0
Solyc01g020440.2.1	60.1258	60.6335	51.3878	49.9696	47.3522	43.1219	51.2158	53.1659	51.0231	50.7399
Solyc01g020450.1.1	0	0	0	0	0	0	0	0	0	0
Solyc01g020460.1.1	0	0	0	0	0	0	0	0	0	0
Solyc01g020470.1.1	0	0	0	0	0	0	0	0	0	0
Solyc01g020480.1.1	0	0	0	0	0	0	0	0	0	0
Solyc01g020490.1.1	0	0	0	0	0	0	0	0	0	0
Solyc01g020500.1.1	0.0848636	0.0816063	0	0.0916873	0.0516382	0.152554	0	0	0.046639	0
Solyc01g020510.1.1	0	0	0	0	0	0	0	0	0	0
Solyc01g020520.2.1	6.32234	5.59003	6.58193	5.7763	6.24822	5.28853	4.18915	6.23038	4.38406	4.56612
Solyc01g020530.1.1	0	0.0408031	0	0	0	0.0508513	0	0.0593369	0.046639	0
Solyc01g020550.1.1	0	0	0	0	0	0	0	0	0	0
Solyc01g020560.1.1	0.0424318	0.0408031	0.341285	0.229218	0.103276	0.152554	0.135134	0.0593369	0.046639	0.186372
Solyc01g020570.1.1	0.0424318	0.163213	0.048755	0.0916873	0.0516382	0	0.067567	0	0.046639	0
Solyc01g020580.1.1	0.0424318	0	0	0	0	0.0508513	0	0	0	0
Solyc01g020590.1.1	0.0848636	0	0	0	0.0516382	0	0	0	0	0.0465931
Solyc01g020600.1.1	0.0848636	0.163213	0.19502	0.0458437	0.258191	0.152554	0.135134	0.118674	0.093278	0.0931862
Solyc01g021600.2.1	0	0	0	0	0	0	0	0	0	0
Solyc01g021610.1.1	0	0	0	0	0	0	0	0	0	0
Solyc01g021620.1.1	0	0	0	0	0	0	0	0	0	0
Solyc01g021630.1.1	0	0	0	0	0	0	0	0.0593369	0	0
Solyc01g021640.2.1	16.803	15.6276	15.9429	16.5037	16.0595	14.6452	12.9729	11.6894	12.7791	11.6483
Solyc01g021650.1.1	0	0	0	0	0	0	0	0	0	0
Solyc01g021660.1.1	0	0	0	0	0	0	0	0	0	0
Solyc01g021670.2.1	12.7295	14.6483	11.3599	12.1486	12.135	13.5773	17.7701	18.3351	14.4114	13.8847
Solyc01g021680.1.1	0	0	0	0	0	0.0508513	0	0	0.046639	0.0465931
Solyc01g021690.1.1	0	0	0	0	0	0	0	0	0	0
Solyc01g021700.1.1	0	0	0	0	0	0	0	0	0	0
Solyc01g021710.1.1	0	0	0	0	0	0	0	0	0	0
Solyc01g021720.1.1	0.0848636	0.0408031	0.146265	0.0916873	0	0.101703	0	0.178011	0.046639	0.0931862
Solyc01g021730.2.1	0.0848636	0.326425	0.19502	0.137531	0.361467	0.0508513	0.135134	0.474695	0.373112	0.139779
Solyc01g021740.1.1	5.17668	4.08031	4.92426	4.08009	2.37536	2.79682	3.98645	2.84817	3.49792	3.96041
Solyc01g022740.2.1	14.9784	11.8737	14.7728	16.5037	14.5103	15.052	14.9323	14.1815	12.4526	12.4404
Solyc01g022750.2.1	68.9516	69.4061	65.8193	67.0693	54.1168	53.2921	99.1883	103.958	86.3754	84.7994
Solyc01g022760.1.1	0	0	0	0	0	0	0	0	0	0
Solyc01g022770.1.1	0	0	0.048755	0	0	0	0	0.0593369	0	0
Solyc01g022780.1.1	1.18809	0.244819	0.68257	0.595968	0.516382	0.355959	0.202701	0.118674	0.46639	0.465931
Solyc01g022790.1.1	0	0	0	0	0	0	0	0	0	0
Solyc01g028800.1.1	0.594045	0.979275	0.633815	0.595968	0.774573	1.22043	1.68917	1.1274	0.839502	1.3512
Solyc01g028810.2.1	862.299	856.172	936.877	929.389	850.739	834.317	1237.89	1240.85	1158	1139.48
Solyc01g028830.2.1	8.52879	8.69107	7.11823	7.47252	9.08832	8.44131	5.13509	6.82375	6.24962	5.63776
Solyc01g028840.1.1	0	0	0	0	0	0	0	0	0	0
Solyc01g028850.1.1	0	0	0	0	0	0	0	0	0	0
Solyc01g028860.2.1	549.661	553.576	567.314	566.261	504.04	511.971	470.739	476.416	471.847	465.745
Solyc01g028870.2.1	19.8581	19.9935	22.0373	18.6125	18.6414	17.086	21.2836	22.6074	20.2413	19.8487
Solyc01g028880.1.1	0	0	0	0	0	0	0	0	0	0
Solyc01g028890.1.1	0	0	0	0	0	0	0	0	0	0
Solyc01g028900.2.1	44.8928	48.4333	42.9532	43.3681	48.0751	51.1055	51.0131	47.8849	45.7995	41.0019
Solyc01g028910.1.1	0	0.0408031	0.0975101	0.183375	0.206553	0.0508513	0.202701	0	0.046639	0.0931862
Solyc01g028920.1.1	0	0	0	0	0	0	0	0	0	0
Solyc01g028930.2.1	24.3983	24.7267	23.0124	21.8216	20.2938	20.3405	21.8917	22.2514	21.6871	19.8021
Solyc01g028940.1.1	0	0	0	0	0	0	0	0	0	0
Solyc01g028950.1.1	0	0	0	0	0	0	0	0	0	0
Solyc01g028960.1.1	0	0	0	0	0	0	0	0	0	0
Solyc01g028970.1.1	0	0	0	0	0	0	0	0	0	0
Solyc01g028980.1.1	0	0	0	0	0	0	0	0.0593369	0	0
Solyc01g033980.2.1	0	0	0	0	0	0	0	0	0	0
Solyc01g033990.1.1	0	0	0	0	0	0	0	0	0	0
Solyc01g034000.1.1	0	0	0	0	0	0	0	0	0	0
Solyc01g034010.1.1	0	0	0	0	0	0	0	0	0	0
Solyc01g034020.2.1	63.6477	64.9178	68.0133	67.8486	46.3711	44.3932	61.9589	68.7122	62.2164	64.0655
Solyc01g034030.1.1	0	0	0	0	0	0	0	0	0	0
Solyc01g034040.1.1	0	0	0	0	0	0	0	0	0	0
Solyc01g034050.1.1	0	0	0	0	0	0	0	0	0	0
Solyc01g034060.1.1	0	0	0	0	0	0	0	0	0	0
Solyc01g034070.1.1	0.127295	0.163213	0.341285	0.320906	0.154915	0.0508513	0.135134	0.0593369	0.093278	0.0931862
Solyc01g034080.1.1	1.06079	1.06088	1.02386	1.00856	1.60078	1.67809	0.608103	0.474695	1.49245	0.885269
Solyc01g034090.1.1	0	0	0	0	0	0	0	0	0	0
Solyc01g034100.1.1	0	0	0	0	0	0	0	0	0	0
Solyc01g034110.1.1	0	0	0	0	0	0	0	0	0	0
Solyc01g034120.2.1	0	0	0	0	0	0	0	0	0.046639	0
Solyc01g034130.1.1	0	0	0	0	0	0	0	0	0	0
Solyc01g034140.1.1	0	0	0	0	0	0	0	0	0	0
Solyc01g034150.2.1	27.2412	26.6444	28.2779	29.615	30.5698	28.0191	17.3647	18.5131	22.0136	19.7555
Solyc01g034160.1.1	0	0	0	0.0458437	0	0.0508513	0	0	0	0
Solyc01g034170.1.1	0	0	0	0	0	0	0	0	0	0
Solyc01g034180.1.1	0	0	0.048755	0.0916873	0.154915	0	0	0	0	0
Solyc01g034190.1.1	0	0	0	0	0	0	0	0	0	0
Solyc01g034200.1.1	0	0	0	0	0	0	0	0	0	0
Solyc01g034210.1.1	0	0	0	0	0	0	0	0	0	0
Solyc01g034220.1.1	0.0424318	0.0816063	0	0	0.0516382	0	0	0.0593369	0	0
Solyc01g035220.1.1	0	0	0	0	0	0	0	0	0	0
Solyc01g038220.1.1	0	0	0	0	0	0	0	0	0	0
[truncated: 32,726 more rows]

## Sheet: C. annuum
geneid	MVM1	MVM2	TM1	TM2	FM1	FM2
CA00g00010	0	0	0	0	0	0
CA00g00020	7.52357	6.59627	9.14035	5.07068	11.2776	8.2342
CA00g00030	0	0.162871	0.453776	0.250404	0	0.117631
CA00g00040	37.9314	29.8054	49.2671	39.376	149.767	141.981
CA00g00050	884.96	898.64	686.045	628.765	696.204	708.376
CA00g00060	3.76179	5.94479	10.2424	9.76576	12.6309	12.7042
CA00g00070	0	0.0814355	0.388951	0	0	0
CA00g00080	0	0	0	0	0	0
CA00g00090	0.208988	1.3844	0.972377	0.062601	0.300736	0.235263
CA00g00100	2.29887	1.1401	2.78748	3.69346	0.451104	0.470526
CA00g00110	0.626964	0.0814355	1.0372	3.56826	0.451104	0.235263
CA00g00120	0.52247	0.325742	0.259301	0.313005	0	0.117631
CA00g00130	0	0.488613	0	0	0	0
CA00g00140	0.104494	0.162871	0.388951	0.375606	0	0
CA00g00150	0.731459	0.244306	0.0648251	0.375606	0.902209	0.588157
CA00g00160	5.01572	7.24776	4.66741	4.94548	5.56362	6.23447
CA00g00170	14.6292	12.3782	15.4932	10.8926	15.7887	17.4095
CA00g00180	12.3303	11.2381	7.97349	6.69831	8.27025	8.58709
CA00g00190	0	0	0	0.250404	0	0
CA00g00200	0	0	0	0	0	0
CA00g00210	0.52247	0.977226	0.907552	1.37722	1.35331	1.05868
CA00g00220	0.208988	0	0	0.062601	0	0
CA00g00230	0	0	0	0	0	0
CA00g00240	7.52357	4.31608	7.39007	5.44629	7.0673	5.88157
CA00g00250	25.81	26.2222	27.1617	39.8142	31.1262	33.0544
CA00g00260	32.6022	37.9489	37.9875	33.9924	24.51	26.5847
CA00g00270	2.19438	0.488613	3.17643	1.56503	3.60883	3.17605
CA00g00280	0	0	0.194475	0	0	0
CA00g00290	28.9449	26.4665	24.5039	26.4802	23.9085	26.1142
CA00g00300	7.83706	4.07177	4.92671	6.82351	1.80442	1.76447
CA00g00310	0	0	0	0	0	0
CA00g00320	37.9314	32.9814	36.8207	47.702	45.1104	48.1113
CA00g00330	0	0.570048	0	0.062601	0	0
CA00g00340	0.104494	0	0.194475	0.563409	0.451104	0.705789
CA00g00350	22.7797	19.0559	21.3275	19.0307	28.8707	29.5255
CA00g00360	0	0	0	0	0	0
CA00g00370	0	0	0	0	0	0
CA00g00380	0.52247	0.325742	0	0.813813	0.751841	0.705789
CA00g00390	6.37414	3.6646	3.04678	3.81866	4.36068	6.94025
CA00g00400	16.6146	17.5901	14.6505	12.395	18.1945	14.4687
CA00g00410	3.86628	4.07177	0.842727	1.12682	2.55626	3.29368
CA00g00420	1.67191	2.11732	0.907552	3.50566	0.902209	1.17631
CA00g00430	37.4089	28.991	33.8387	30.5493	29.6225	35.2894
CA00g00440	371.163	369.554	319.718	319.077	315.623	316.429
CA00g00450	26.1235	25.815	20.2903	26.1046	25.8633	20.5855
CA00g00460	13.5842	12.9482	13.4836	13.647	9.77393	9.29288
CA00g00470	1.46292	3.09455	2.91713	2.69184	3.15773	3.05842
CA00g00480	0.52247	0.814355	1.36133	2.37884	2.55626	2.70552
CA00g00490	1.04494	0.651484	1.62063	4.69508	2.25552	2.235
CA00g00500	0.208988	0	0	0	0	0
CA00g00510	20.0629	13.274	18.54	24.0388	14.1346	14.351
CA00g00520	0.313482	0.814355	0.713077	1.75283	0.601472	0.235263
CA00g00530	0.313482	0.488613	0	0	0.300736	0
CA00g00540	6.26964	10.7495	10.8258	8.01293	9.77393	7.41078
CA00g00550	42.3201	48.2098	50.8877	51.2702	43.306	37.9949
CA00g00560	0.626964	0	0	0	0	0.235263
CA00g00570	0.835953	0.488613	0.194475	0.125202	0	0
CA00g00580	0.104494	0	0	0	0.150368	0
CA00g00590	0.940447	0.651484	1.10203	1.31462	1.05258	1.29395
CA00g00600	230.096	236.896	235.834	194.501	203.598	197.621
CA00g00610	0.104494	0	0	0	0	0
CA00g00620	0.313482	0	0	0	0	0
CA00g00630	0.940447	0.488613	0.388951	1.43982	1.20294	0.941051
CA00g00640	36.2594	39.8219	34.2277	40.4403	34.1336	32.8192
CA00g00650	5.43369	6.51484	3.63021	4.13167	3.00736	3.88184
CA00g00660	0.208988	0.162871	0.12965	0.438207	0	0
CA00g00670	0	0	0.388951	0.125202	0.601472	0.352894
CA00g00680	0	0.407177	0	0.062601	0.150368	0.117631
CA00g00690	0	0	0	0	0	0
CA00g00700	3.13482	3.42029	7.71419	7.88773	6.31546	7.17552
CA00g00710	0	0	0.0648251	0	0	0
CA00g00720	67.3987	59.5293	49.6561	51.5832	66.0116	55.9926
CA00g00730	3.97078	2.68737	6.22321	3.13005	1.65405	1.52921
CA00g00740	0.835953	0.570048	0.907552	1.43982	0.150368	0.588157
CA00g00750	1.88089	1.62871	0.518601	0.438207	0.300736	0.352894
CA00g00760	2.92583	0.570048	1.36133	1.31462	0.601472	0.470526
CA00g00770	0	0	0	0	0.150368	0.117631
CA00g00780	87.566	2617.25	482.688	241.077	352.162	347.718
CA00g00790	0	0	0.388951	0.062601	0	0
CA00g00800	0	0	0	0	0	0
CA00g00810	0	0	0	0	0	0
CA00g00820	0	0	0	0	0	0
CA00g00830	88.9245	1866.99	383.441	174.031	255.776	266.788
CA00g00840	0	0.0814355	0	0.062601	0.150368	0.117631
CA00g00850	0	0	0	0	0	0
CA00g00860	0	0	0	0	0	0
CA00g00870	16.928	14.2512	13.8078	14.8364	22.1041	22.4676
CA00g00880	0.731459	0.0814355	0.388951	0.688611	0.300736	0.235263
CA00g00890	0.313482	1.3844	0.388951	1.37722	0.601472	0.470526
CA00g00900	1.56741	2.44306	2.00958	1.37722	0.751841	1.29395
CA00g00910	7.83706	8.38785	6.28804	4.75768	5.41325	4.23473
CA00g00920	6.26964	6.75914	10.9554	4.82028	9.9243	7.99894
CA00g00930	3.34381	4.15321	2.91713	4.06907	3.3081	3.05842
CA00g00940	0	0.814355	0.518601	0.313005	0.451104	0.117631
CA00g00950	52.1425	47.7212	46.0907	52.084	52.6288	58.5804
CA00g00960	0	0	0	0	0	0
CA00g00970	54.6504	57.412	63.9824	56.5913	54.1325	48.9347
CA00g00980	1.14943	1.46584	1.62063	0.939015	1.65405	3.41131
CA00g00990	35.6325	30.9455	33.3849	34.681	33.2314	33.0544
CA00g01000	18.9134	14.4141	12.8354	13.8348	13.5331	15.5273
CA00g01010	10.3449	12.5411	9.59412	6.3227	8.27025	6.23447
CA00g01020	60.1886	59.0407	62.0377	60.5978	55.3355	51.9931
CA00g01030	126.438	123.7	108.323	94.2145	105.258	109.044
CA00g01040	0.417976	0	0	0.500808	0.300736	0.352894
CA00g01050	0.313482	0.162871	0.388951	0.62601	0.601472	1.29395
CA00g01060	1.7764	1.62871	2.91713	1.43982	0.751841	0.941051
CA00g01070	17.764	21.5804	16.8545	22.912	14.7361	17.7623
CA00g01080	0.208988	0.244306	0.388951	0.250404	0	0
CA00g01540	34.483	40.4734	47.0631	46.3248	51.7266	45.8763
CA00g01550	1.25393	0	0.0648251	0.250404	0.150368	0.352894
CA00g01560	0	0	0	0	0.150368	0
CA00g01570	2.50786	2.44306	2.13923	0.876414	5.26288	4.70526
CA00g01580	9.19548	8.79503	6.15839	5.00808	4.81178	3.88184
CA00g01590	30.0943	29.8054	25.3466	31.4883	30.6751	28.5844
CA00g01600	0	0.0814355	0	0.125202	0	0
CA00g01610	45.1414	34.3658	42.9142	49.6426	44.6593	48.6994
CA00g01620	78.0571	57.982	41.877	37.8736	67.6657	64.462
CA00g01630	0	0	0	0	0	0.117631
CA00g01640	0	0	0	0	0	0
CA00g01650	0	0	0.259301	0	0	0
CA00g01660	0.104494	0	0	0.062601	0.300736	0.235263
CA00g03020	0	0	0	0	0	0
CA00g03030	0.104494	0.162871	0.518601	0.125202	0	0.117631
CA00g03040	111.704	106.68	101.905	94.7153	93.6793	87.9883
CA00g03050	1.14943	1.22153	3.43573	3.13005	2.40589	3.41131
CA00g03060	0.208988	0.407177	0	0.500808	0	0
CA00g03070	0.52247	0.732919	0.648251	1.00162	0.902209	0.82342
CA00g03080	0.417976	0.0814355	0.518601	0.62601	0	0.235263
CA00g03090	24.0336	21.3361	20.6144	13.4592	20.1493	17.1742
CA00g03100	0.731459	0	0	0	0.300736	0.117631
CA00g03110	105.957	86.6473	94.7744	76.3732	117.588	126.571
CA00g03120	0	0	0.194475	0	0.150368	0.235263
CA00g03130	0.417976	0.977226	0.453776	0.62601	1.05258	0.470526
CA00g03140	0.208988	0.325742	0.777902	0.125202	1.20294	1.52921
CA00g03150	8.35953	7.41063	8.42727	10.5796	6.46583	9.05762
CA00g04470	0	0	0	0	0	0
CA00g04480	3.03033	1.87302	1.36133	1.62763	0.902209	1.41158
CA00g04490	0	0	0	0	0	0
CA00g04500	0	0	0	0	0	0
CA00g04510	0.940447	0.325742	1.0372	1.37722	0.601472	1.29395
CA00g04520	0	0.325742	0	0	0.150368	0.235263
CA00g04530	0	0	0	0	0	0
CA00g04540	0	0	0	0	0	0
CA00g04550	0	0	0	0	0	0
CA00g04560	0	0	0	0	0	0
CA00g04570	217.243	228.589	270.645	259.481	253.37	244.085
CA00g04580	1.67191	1.62871	1.8151	1.18942	1.20294	1.17631
CA00g04590	0	0	0	0	0	0
CA00g04600	22.6752	20.4403	20.2903	13.4592	14.7361	15.645
CA00g04610	364.893	340.97	316.412	322.02	318.63	350.424
CA00g04620	0	0	0	0	0	0
CA00g04630	0.208988	0	0	0	0	0
CA00g06650	0	0	0	0	0	0
CA00g06660	25.2876	481.691	185.4	110.366	86.0106	97.6341
CA00g06670	0	0	0	0	0	0
CA00g06680	61.756	47.314	65.6679	59.3458	83.755	75.5194
CA00g06690	0	0	0	0	0	0
CA00g06700	20.5853	27.5252	24.4391	21.2217	28.8707	23.7615
CA00g06710	1.35842	0.488613	1.2965	2.00323	1.20294	1.52921
CA00g06720	78.7885	80.4582	66.3161	55.8401	52.4785	49.1699
CA00g06730	0.104494	0	0	0	0	0
CA00g06740	0	0	0.12965	0	0	0
CA00g06750	0	0	0	0.062601	0	0
CA00g06760	0	0	0	0.062601	0.150368	0
CA00g06770	0	0	0	0	0	0
CA00g06780	0	0	0	0	0	0
CA00g06790	0	0	0	0	0	0
CA00g06800	10.8674	10.5866	7.84384	8.57634	8.57098	7.41078
CA00g06810	0	0	0	0	0	0
CA00g06820	0	0	0	0	0	0
CA00g06830	0	0	0	0	0	0
CA00g06840	0	0	0	0	0.150368	0.352894
CA00g06850	0	0	0	0	0	0
CA00g06860	14.1067	11.8081	12.9002	9.39015	7.96951	10.1163
CA00g06870	5.2247	4.07177	8.55692	7.57472	9.77393	10.8221
CA00g06880	2.82134	1.05866	3.11161	4.75768	1.20294	1.76447
CA00g06890	10.0314	3.82747	9.72377	12.708	10.0747	6.58736
CA00g06900	0.104494	0	1.36133	0.751212	0.451104	0.235263
CA00g06910	0	0	0	0	0	0
CA00g06920	0	0	0.12965	0	0	0
CA00g06930	58.7257	59.7736	53.8049	52.7101	66.4627	58.8157
CA00g06940	60.92	46.744	51.4712	56.4035	47.366	48.3465
CA00g06950	39.3943	38.7633	46.9982	39.8142	36.6898	36.3481
CA00g06960	46.8133	46.8254	68.8443	72.2416	56.0873	57.0512
CA00g06970	2.71685	1.79158	1.42615	1.43982	0.451104	0.705789
CA00g06980	51.3066	59.1221	50.3691	52.2719	60.7487	56.4631
CA00g06990	173.669	162.138	153.895	130.836	145.406	150.921
CA00g07000	13.1663	13.274	17.1787	15.3372	11.5783	9.99867
CA00g07010	33.9606	39.5776	29.301	36.9972	49.02	46.9349
CA00g07020	17.4505	12.9482	15.4932	18.4673	19.5479	18.3505
CA00g07030	1.14943	1.22153	0.972377	0.250404	0.150368	0.117631
CA00g07040	0	0	0	0	0	0
CA00g07050	0	0.732919	0.907552	0.375606	0.451104	0.117631
CA00g07060	45.7684	46.6625	28.2638	31.6135	38.3439	34.9365
CA00g07070	0	0	0	0	0	0
CA00g07080	26.646	22.8019	26.4487	23.538	25.7129	23.8792
CA00g07090	3.03033	0.89579	4.86189	3.25525	2.40589	2.235
CA00g07100	0	0	0	0	0	0
CA00g07110	39.7078	24.7564	39.5433	45.4483	33.8328	28.1139
CA00g07120	63.8459	74.6763	59.2502	51.0824	49.7718	49.4052
CA00g07130	14.4202	9.60938	11.3444	13.0836	12.0294	12.3513
CA00g07140	41.6931	27.7695	38.0524	33.6793	34.2839	33.1721
CA00g07150	0.313482	0	0.194475	0	0	0
CA00g07160	2.82134	1.05866	2.72266	2.81705	1.95479	1.41158
CA00g07170	22.2572	25.245	36.3669	33.4289	39.2461	30.5842
CA00g07180	11.3899	11.3195	13.4188	13.4592	16.6909	13.8805
CA00g07190	13.6887	12.4596	14.9098	9.82836	12.1798	12.2337
CA00g07200	99.2694	95.8495	79.0867	79.8789	95.7845	99.9867
CA00g07210	24.3471	20.766	21.3923	19.6567	27.9685	32.1134
CA00g07220	0	0	0	0	0	0
CA00g07230	0	0	0	0	0	0
CA00g07240	0	0.0814355	0	0	0	0
CA00g07250	0.417976	0.0814355	1.36133	0.688611	0.601472	0.941051
CA00g07260	17.137	22.1504	19.1234	15.5877	21.5026	23.7615
CA00g07270	5.12021	5.70048	4.01916	4.38207	5.11252	4.70526
CA00g07280	0.313482	0.162871	0.713077	0.62601	2.25552	1.17631
CA00g07290	1.67191	0.732919	1.94475	1.81543	2.70663	2.70552
CA00g07300	0	0	0	0	0	0
CA00g07310	0	0	0.0648251	0.313005	0.451104	0.705789
CA00g07320	0.313482	0.162871	2.52818	1.87803	0.902209	1.05868
CA00g07330	17.0325	9.20221	22.3647	20.3453	7.96951	8.70473
CA00g09800	0	0	0	0	0	0
CA00g09810	0.208988	0.570048	0	0	0	0
CA00g09820	28.2134	26.9551	28.1989	31.3631	35.938	29.1726
CA00g09830	0.626964	0	0.12965	0.125202	0	0
CA00g09840	0	0	0	0	0	0
CA00g09850	0	0	0	0.062601	0.150368	0.235263
CA00g09860	2.82134	4.31608	4.99154	3.19265	3.3081	3.41131
CA00g09870	0	0	0	0	0	0
CA00g09880	1.88089	1.05866	1.49098	1.06422	0.751841	0.235263
CA00g09890	0	0	0	0	0	0
CA00g09900	0	0	0	0	0	0
CA00g09910	4.38875	2.68737	6.67699	4.94548	6.16509	5.41105
CA00g10820	1010.46	934.472	935.297	943.961	965.363	920.231
CA00g10830	66.4582	52.1187	57.3054	66.8579	61.0495	53.8752
CA00g10840	16.7191	14.8213	15.4932	16.5267	12.7813	12.116
CA00g10850	0.731459	1.30297	0.518601	0.62601	0.601472	0.352894
CA00g10860	26.9595	27.2809	29.301	23.0372	29.021	31.8781
CA00g10870	7.73256	5.53761	6.93629	4.31947	3.90957	5.41105
CA00g10880	23.3022	19.3002	25.217	24.3518	24.2093	23.6439
CA00g10890	0	0	0	0	0	0
CA00g10900	0	0.162871	0	0	0.150368	0.117631
CA00g10910	31.6617	25.4079	26.5135	20.1575	23.9085	23.8792
CA00g10920	26.228	22.2319	24.115	24.477	23.9085	25.2908
CA00g10930	0.52247	0.977226	0.583426	0	1.20294	1.76447
CA00g10940	1.67191	0.89579	3.04678	0.939015	1.20294	0.82342
CA00g10950	0	0	0	0	0	0
CA00g10960	0	0	0	0	0	0
CA00g10970	0.208988	0.488613	0.453776	0.187803	1.35331	0.941051
CA00g10980	0	0	0	0	0	0
CA00g10990	6.16515	3.33885	19.4475	17.0901	14.1346	13.0571
CA00g11000	0	0	0	0	0	0
CA00g11010	25.81	25.5707	38.4413	48.1402	28.8707	34.1131
CA00g11020	0	0	0	0	0	0
CA00g11030	0.208988	0	0	0	0	0
CA00g11040	0	0	0	0	0	0
CA00g11050	22.8842	21.9876	20.6144	25.0404	34.1336	31.9957
CA00g11060	131.767	113.277	124.075	109.74	129.617	132.806
CA00g11070	0	0	0	0	0	0
CA00g11080	1.88089	0.89579	2.33371	3.44306	0.751841	0.470526
CA00g11090	0	0	0	0	0	0
CA00g11100	131.349	145.444	127.641	155.376	117.738	111.279
CA00g11110	0.52247	0.407177	0.259301	0.250404	0.150368	0.117631
CA00g11120	0	0.244306	0.0648251	0.313005	0	0
CA00g11130	0	0	0	0	0	0
CA00g11140	0	0	0.583426	0.250404	0	0
CA00g11150	47.7538	49.9199	58.9261	38.5622	51.1252	44.9352
CA00g11160	411.184	367.518	327.367	325.65	333.516	331.603
CA00g11170	0	0	0	0	0	0
CA00g11180	0	0	0	0	0	0
CA00g11190	14.4202	10.9124	16.0766	12.6454	20.2997	17.88
CA00g11200	0	0	0	0	0	0
CA00g11210	0	0	0.0648251	0	0	0
CA00g11220	0	0	0	0	0	0
CA00g13640	0	0	0	0	0	0
CA00g13650	0	0	0	0	0	0
CA00g13660	0	0	0	0	0	0
CA00g13670	0	0	0	0	0	0
CA00g13680	0	0	0	0	0	0
CA00g13690	0	0	0	0	0	0
CA00g13700	2.19438	1.22153	2.00958	2.06583	0.300736	1.41158
CA00g13710	0	0.0814355	0	0.062601	0	0.117631
CA00g15180	0	0	0	0	0	0
CA00g15190	0	0	0.518601	0.751212	0.601472	0.941051
CA00g15200	0	0	19.7068	17.2153	5.86436	6.11683
CA00g15210	0	0	0	0	0	0
CA00g15220	0.208988	0.0814355	0.713077	1.18942	0.150368	0
CA00g15230	0	0	0	0	0	0
CA00g15240	12.0168	9.20221	18.0862	10.2666	10.9769	11.5279
CA00g15250	12.3303	9.60938	8.81622	9.39015	9.77393	8.58709
CA00g15260	4.28426	4.39751	3.82468	3.63086	1.35331	0.941051
CA00g15270	14.9427	16.6128	16.1415	11.8942	12.3302	10.3516
CA00g15280	42.0066	37.3789	39.8675	48.954	42.2534	43.8765
CA00g15290	3.23932	1.05866	2.33371	2.12843	5.41325	3.64657
CA00g15300	0	0	0	0.062601	0	0
CA00g15310	21.8393	16.7757	20.1606	17.9039	15.0368	16.3508
CA00g15320	24.4516	18.0787	25.1522	23.225	21.0515	20.8208
CA00g15330	0	0	0	0	0	0
CA00g15340	0.835953	1.1401	0.518601	0.813813	0.300736	0.352894
CA00g15350	0.208988	0.0814355	0.583426	0.688611	0.300736	0.235263
CA00g15360	0	0.0814355	0	0	0	0
CA00g15370	0	0	0	0	0	0
CA00g15810	0.626964	1.1401	0.777902	1.31462	0.751841	0.235263
CA00g15820	0	0	0	0	0	0
CA00g15830	0	0	0.0648251	0	0	0
CA00g15840	25.0786	27.8509	30.9864	29.1721	31.878	36.1128
CA00g15850	0.626964	1.05866	0.972377	1.43982	0	0.235263
CA00g15860	0.208988	0.325742	0.0648251	0.062601	0.451104	0.235263
CA00g15870	1.7764	1.79158	2.91713	1.62763	1.65405	2.235
CA00g15880	159.562	144.059	208.218	200.761	159.992	164.919
CA00g15890	9.19548	7.24776	5.25084	5.32109	7.0673	5.88157
CA00g15900	0.208988	0	0.583426	0.313005	2.10515	2.47026
CA00g15910	0	0	0	0	0	0
CA00g15920	0	0	0	0	0	0
CA00g15930	0.104494	0	0	0.563409	0.150368	0.352894
CA00g15940	0	0.325742	0	0	0	0
CA00g15950	0	0	0	0	0	0
CA00g15960	10.3449	16.2057	15.7525	14.586	14.285	12.7042
CA00g15970	4.70223	4.39751	2.91713	2.31624	0.902209	1.76447
CA00g15980	3.03033	3.25742	5.31566	3.88126	3.15773	4.23473
CA00g15990	0.104494	0.0814355	0.12965	0.375606	0.150368	0.235263
CA00g16000	579.002	525.177	495.977	496.113	626.434	591.333
CA00g16010	0	0.244306	0.0648251	0	0.300736	0.117631
CA00g16020	0.208988	1.05866	0.0648251	0.438207	0.150368	0
CA00g16030	71.265	54.7246	88.616	92.5243	113.077	108.691
CA00g16040	56.3223	56.3533	59.3798	55.0889	59.6961	60.6978
CA00g16280	0.104494	0	0.713077	1.43982	0	0.235263
CA00g16290	0	0	0	0	0	0
CA00g16300	0.104494	0	0	0	0	0
CA00g16310	0	0	0	0	0	0
CA00g16320	0.313482	0	0	0.250404	0	0
CA00g16330	6.26964	4.47895	6.48251	4.44467	5.71399	5.29341
CA00g16340	10.8674	11.3195	16.6601	13.3966	8.42061	11.4102
CA00g16350	0	0.162871	0	0	0	0
CA00g16360	25.81	25.4893	28.0693	22.599	43.306	46.582
CA00g16370	0.52247	0	0	0	0	0
CA00g16380	0	0	0	0	0	0
CA00g16390	0	0	0	0	0	0
CA00g16400	0.104494	0	0	0	0	0
CA00g16410	28.3179	34.8544	29.9492	28.2957	23.1567	24.3497
CA00g16420	62.0695	64.8226	59.7688	66.4197	49.7718	54.1105
CA00g16430	2.08988	2.11732	3.56538	1.75283	2.10515	2.235
CA00g16440	0	0.0814355	0	0.187803	0	0.117631
CA00g16450	0	0.488613	0.259301	0.125202	0.300736	0.235263
CA00g16460	1.04494	1.22153	1.8151	1.87803	2.10515	1.41158
CA00g16470	0	0	0	0	0	0
CA00g16480	1.35842	0.651484	0.777902	0.876414	0.150368	0.705789
CA00g16490	0.626964	1.30297	0.907552	0.62601	0.601472	0.588157
CA00g16500	0	0.325742	0	0	0.150368	0
CA00g16510	0	0.244306	0	0.062601	0	0.117631
CA00g16520	0	0	0	0.250404	0	0
CA00g16530	163.951	136.567	169.972	212.53	172.322	165.978
CA00g16540	0	0	0	0	0	0
CA00g16550	0	0	0	0	0	0
CA00g16560	0	0	0	0	0	0
CA00g16570	174.714	139.255	151.885	157.003	190.968	179.741
CA00g16580	274.506	220.283	271.164	269.372	299.533	290.197
CA00g16590	187.671	173.946	250.29	257.478	253.07	250.908
CA00g16600	0	0	0.194475	0	0.751841	0.235263
CA00g16610	0	0	0	0	0	0
CA00g16620	0	0	0	0	0	0
CA00g16630	0	0	0	0	0	0
CA00g16640	0	0	0	0	0	0
CA00g16650	0	0	0.12965	0.250404	0	0
CA00g16660	2.82134	4.07177	4.60259	1.37722	3.00736	2.58789
CA00g16670	0	0	0	0	0	0
CA00g16680	0.208988	0.325742	0.388951	1.00162	0.300736	0.352894
CA00g18290	0	0	0	0	0	0
CA00g18300	48.6942	45.3596	44.4052	35.1192	46.9149	48.2289
CA00g18310	123.512	113.114	107.934	101.727	103.604	124.336
CA00g18320	9.29997	6.51484	12.5761	15.3372	10.9769	12.5866
CA00g18330	1.67191	1.95445	2.33371	3.00485	2.85699	4.23473
CA00g18340	1.88089	2.76881	2.00958	3.38045	2.10515	2.47026
CA00g18350	3.13482	3.17598	3.69503	5.63409	2.40589	2.47026
CA00g18360	0.626964	0.0814355	1.62063	1.81543	2.25552	2.82315
CA00g18370	71.7874	54.7246	182.288	201.513	255.325	244.556
CA00g18380	4.59774	3.17598	4.92671	6.57311	4.96215	4.70526
CA00g18390	25.0786	31.0269	22.5592	21.0339	23.3071	23.7615
CA00g18400	15.5696	12.5411	20.744	21.8478	18.1945	15.9979
CA00g18410	46.7089	41.2063	38.6358	42.0053	32.4795	33.7602
CA00g18420	0	0	0	0	0	0
CA00g18430	0	0	0	0	0	0
CA00g18440	1.46292	0.977226	1.62063	1.31462	1.95479	1.8821
CA00g18450	0	0	0	0	0	0
CA00g18720	0	0.0814355	0.842727	0.688611	0	0.235263
CA00g18730	0	0	0	0	0	0
CA00g18740	19.9584	15.9614	20.8089	20.7209	13.8339	15.0568
CA00g18750	45.4549	46.4182	43.3032	41.3167	45.4112	50.6991
CA00g18760	1.56741	1.3844	1.68545	0.187803	6.01472	6.3521
CA00g18770	0	0	0	0	0	0
CA00g18780	371.685	340.645	351.287	332.474	367.199	368.892
CA00g18790	17.8685	16.1242	14.7801	13.0836	16.8412	13.41
CA00g18800	48.3808	52.4444	47.841	57.4677	51.7266	50.6991
CA00g18810	0	0	0	0	0	0
CA00g18820	0	0	0	0	0	0
CA00g18830	0	0	0	0	0	0
CA00g18840	2.71685	3.25742	3.04678	1.50242	5.11252	5.05815
CA00g18850	0	0	0.12965	0.187803	0.601472	1.29395
CA00g18860	9.29997	7.8178	12.7706	13.4592	6.91693	7.64604
CA00g18870	1.46292	0.325742	1.5558	2.12843	1.95479	2.58789
CA00g18880	10.6584	5.78192	7.97349	9.57796	5.71399	5.17578
CA00g18890	13.1663	16.6943	10.6313	13.2088	12.9317	13.8805
CA00g18900	13.4797	12.7854	16.0118	21.8478	12.4806	11.4102
CA00g19760	131.767	134.043	145.727	148.803	132.474	130.218
CA00g19770	2.29887	3.9089	4.53776	4.06907	3.3081	4.46999
CA00g19780	0	1.30297	0	0	0.300736	0.352894
CA00g19790	259.981	249.925	246.984	232.688	253.521	259.848
CA00g19800	0	0	0	0	0	0
CA00g19810	2.71685	1.71014	1.0372	1.06422	2.10515	3.76421
CA00g19820	0	0	0	0	0	0
CA00g19830	5.2247	4.64182	4.99154	7.19912	1.65405	1.41158
CA00g19840	15.5696	11.2381	20.744	11.5812	6.76657	7.17552
CA00g19850	0	0	0	0	0	0
CA00g19860	0	0	0	0	0	0
CA00g19870	0	0	0	0	0	0
CA00g19880	19.6449	16.9386	16.9194	14.586	12.3302	11.0574
CA00g19890	15.8831	10.9938	13.7429	14.6486	13.5331	15.7626
CA00g19900	3.65729	1.95445	3.82468	4.44467	3.00736	3.41131
CA00g19910	19.7494	16.2871	17.438	10.204	15.3375	14.351
CA00g19920	21.6303	18.0787	15.2987	14.586	10.8265	9.29288
CA00g19930	0	0	0	0	0	0
CA00g20830	0.940447	1.71014	1.8151	1.25202	0.451104	0.82342
CA00g20840	15.3606	18.323	17.2435	19.1559	17.142	23.5263
CA00g20850	18.2865	14.5769	15.1691	10.83	16.8412	17.4095
CA00g20860	3.03033	6.02622	4.79706	5.13328	5.11252	3.99947
CA00g20870	1.25393	0.325742	3.95433	5.25849	4.05994	3.76421
CA00g20880	37.1999	29.8868	49.7209	43.1321	44.0579	44.5823
CA00g22810	13.0618	9.36508	17.8917	14.273	9.47319	7.88131
CA00g22820	4.07527	0.89579	2.85231	3.56826	3.60883	3.52894
CA00g22830	0	0	0	0	0	0
CA00g22840	0	0	0	0	0	0
CA00g22850	0	0	0	0	0	0
CA00g22860	0	0	0	0	0	0
CA00g22870	0	0	0	0	0.902209	0.235263
CA00g22880	18.5999	21.7433	31.9588	31.9891	27.5174	25.2908
CA00g22890	1.14943	0.89579	0.907552	0.751212	1.50368	1.05868
CA00g24860	0.104494	0.0814355	0.12965	0.125202	0.601472	0.588157
CA00g24870	23.3022	12.5411	6.61216	6.3227	9.17246	8.35183
CA00g24880	1.25393	0	0.713077	0.187803	0.150368	0.117631
CA00g24890	2.50786	2.19876	5.44531	4.13167	3.3081	2.82315
CA00g24900	12.4348	12.1339	9.59412	10.0162	11.1272	12.3513
CA00g24910	1.14943	1.95445	2.33371	2.25364	1.65405	1.8821
CA00g24920	0	0	0	0	0	0
CA00g24930	34.692	35.5873	41.164	35.8704	40.449	40.4652
CA00g24940	65.7268	51.06	75.8454	90.0203	77.2892	73.0491
CA00g24950	0	0.162871	0	0	0.751841	1.05868
CA00g24960	0	0	0	0	0	0
CA00g24970	0	0	0	0	0	0
CA00g24980	0.417976	0	0.12965	0.062601	0	0.235263
CA00g24990	0.940447	0.0814355	0.194475	0.250404	0.150368	0
CA00g25000	0	0	0	0	0	0
CA00g25010	0	0	0	0	0	0
CA00g25020	0	0	0.0648251	0.062601	0	0.588157
CA00g25030	2.19438	0.162871	0.324126	0.375606	0	0
CA00g25040	0	0	0	0	0	0
CA00g25050	0	0	0	0	0	0
CA00g25060	0	0	0	0	0	0
CA00g25070	11.3899	8.87647	7.64937	5.57149	5.86436	5.76394
CA00g25080	0.417976	0	0.583426	0.563409	0	0.117631
CA00g25090	7.1056	3.01311	4.66741	4.56987	7.81914	6.3521
CA00g25100	2.40336	2.03589	3.43573	3.50566	0.751841	1.64684
CA00g25110	0	0	0	0	0	0
CA00g25120	0	0.162871	0.0648251	0	0	0
CA00g25130	0	0	0	0	0	0
CA00g25140	0	0	0.194475	0	0	0
CA00g25150	11.0764	13.0297	11.863	14.273	9.62356	9.64578
CA00g25160	0.835953	0.488613	0.713077	0.813813	0.150368	0.235263
CA00g25170	0.208988	0.162871	0.194475	0.062601	0.300736	0.588157
CA00g25180	74.7133	72.4776	59.3798	72.9302	65.1094	63.2857
CA00g25190	102.091	92.755	91.9221	113.683	79.9958	87.6354
CA00g25200	1.67191	1.79158	1.36133	2.06583	1.20294	0.82342
CA00g25210	0	0	0	0.438207	0	0
CA00g25220	0	0	0	0	0	0
CA00g25230	56.6358	41.8578	50.5636	54.5881	32.1788	35.9952
CA00g25240	41.7976	41.2063	34.6815	38.6248	29.9233	29.2902
CA00g25250	0.417976	0	0	0	0	0
CA00g25260	4.28426	7.16632	3.43573	4.56987	2.40589	3.52894
CA00g25270	9.50896	9.69082	11.2147	9.26495	8.11988	9.88104
CA00g25280	2.50786	4.47895	3.56538	3.94386	5.56362	4.35236
CA00g25290	0	0	0	0	0	0
CA00g25300	4.70223	3.6646	6.48251	7.07392	4.05994	3.88184
CA00g25310	12.7483	12.7039	14.0022	16.5893	13.5331	13.7629
CA00g25320	0	0	0	0	0	0
CA00g25330	0	0	0.0648251	0	0	0
CA00g25340	0	0	0.0648251	0	0	0
CA00g25350	16.4056	17.8344	16.0118	17.7161	15.4879	13.2924
CA00g25360	0	0	0	0	0	0
CA00g25370	0	0	0	0	0.150368	0
CA00g25380	1.35842	1.22153	6.48251	5.69669	6.01472	5.05815
CA00g25390	0	0	0	0	0	0
CA00g25400	0	0	0	0	0	0
CA00g25410	0	0	0	0	0	0
CA00g25420	0	0	0	0	0	0
CA00g25430	0	0	0	0	0	0
CA00g25440	65.4133	47.3954	60.9356	71.7408	59.5458	63.8739
CA00g25450	32.6022	32.8999	35.9131	41.6923	38.9453	39.9947
CA00g25460	0	0	0	0	0	0
CA00g25470	87.566	94.7909	79.9294	68.2351	79.0936	78.4602
CA00g25480	2.71685	1.30297	3.43573	3.88126	0.751841	0.705789
CA00g25490	3.76179	6.67771	3.50056	3.13005	2.55626	2.94079
CA00g25500	4.38875	5.70048	3.43573	3.50566	2.70663	2.58789
CA00g25510	2.71685	4.23464	6.28804	6.3853	6.6162	5.41105
CA00g25520	3.23932	4.07177	4.92671	4.44467	5.26288	4.1171
CA00g25530	2.08988	0.814355	2.39853	1.94063	2.70663	3.76421
CA00g25540	8.98649	13.0297	12.6409	10.517	16.6909	15.645
CA00g25550	0	0	0	0.250404	0.902209	0.352894
CA00g25560	0	0	0	0	0	0
CA00g25570	0	0	0	0	0	0
CA00g25580	0	0	0	0	0	0
CA00g25590	0	0	0	0.125202	0	0
CA00g25600	0	0	0	0	0	0
CA00g25610	3.97078	3.17598	2.33371	3.75606	6.46583	5.17578
CA00g25620	0	0	0	0	0	0
CA00g25930	2.29887	3.74603	6.15839	6.0723	3.00736	3.52894
CA00g25940	62.0695	53.0145	58.9909	58.3441	56.9895	54.6986
CA00g25950	1.25393	0.570048	1.16685	0.751212	0	0.235263
CA00g25960	17.973	20.8475	17.7621	20.1575	22.4048	28.2315
CA00g26880	0	0	0	0	0	0
CA00g26890	0	0	0	0	0	0
CA00g26900	5.43369	5.2933	4.01916	6.69831	6.6162	5.29341
CA00g26910	182.656	168.653	158.757	149.929	149.767	147.745
CA00g26920	68.5481	65.5555	61.7784	62.4132	59.6961	69.5202
CA00g26930	68.4436	69.8716	60.6115	58.0311	71.4249	63.7562
CA00g26940	45.0369	62.8682	46.35	46.6378	51.5763	46.1115
CA00g26950	0	0	0	0	0	0
CA00g26960	0	0	0	0.187803	0	0
CA00g26970	0	0	0	0	0	0
CA00g26980	1.56741	0.325742	0.12965	0.313005	1.35331	0.82342
CA00g26990	0	0	0	0	0	0
CA00g27490	0	0	0.0648251	0	0	0
CA00g27500	0.731459	0.977226	0.0648251	0.375606	0.300736	0.705789
CA00g27510	1.14943	0.162871	0.518601	0	0.601472	0.117631
CA00g27520	0.417976	0.0814355	0	0.876414	0.150368	0.470526
CA00g27530	0	0	0	0	0	0
CA00g28740	0	0	0.324126	0	1.35331	1.52921
CA00g28750	0.104494	0.162871	0	0	0	0.470526
CA00g28760	0	0	0	0.062601	0	0
CA00g28770	14.9427	13.5183	17.3083	15.5877	12.6309	12.2337
CA00g28780	44.619	57.982	63.399	53.8369	52.0274	53.4047
CA00g28790	23.3022	32.3299	35.2649	33.0533	33.5321	31.29
CA00g28800	6.26964	6.75914	6.15839	4.25687	8.42061	7.64604
CA00g28810	0	0	0	0	0	0
CA00g28820	0	0.0814355	0	0.313005	0	0
CA00g28830	7.73256	8.38785	10.5017	10.0162	13.2324	9.88104
CA00g28840	0	0.814355	0.518601	1.06422	0.601472	0.588157
CA00g28850	0.104494	0.407177	0	0.125202	0	0
CA00g28860	0	0	0	0	0	0
CA00g28870	0	0	0	0	0	0
CA00g28880	0.417976	0	0	0.688611	0	0
CA00g28890	0.52247	0	0	0	0	0
CA00g28900	215.78	180.217	192.401	189.18	199.388	204.679
CA00g28910	14.5247	15.717	11.6037	16.7145	10.6761	10.8221
CA00g28920	0	0	0	0	0	0
CA00g28930	6.26964	5.86335	21.6516	33.6167	20.1493	20.9384
CA00g28940	0	0	0	0	0	0
CA00g28950	1.14943	1.54727	2.39853	1.18942	2.40589	1.8821
CA00g28960	1.35842	0.488613	0.583426	0.751212	1.05258	0.705789
CA00g28970	91.1188	83.6342	120.704	145.798	121.347	122.219
CA00g29410	0	0	0	0	0	0
CA00g29420	0	0	0	0	0	0
CA00g29430	0	0	0	0	0	0
CA00g29440	0	0	0	0	0	0
CA00g29450	0	0	0	0	0	0
CA00g29460	0	0	0	0	0	0
CA00g29470	0	0.162871	0.12965	0.62601	2.25552	1.52921
CA00g29480	0	0	0	0	0	0
CA00g29490	0	0	0	0	0	0
CA00g29500	0	0.0814355	0	0	0	0
CA00g29510	0	0	0	0.062601	0.451104	0
CA00g29520	0	0	0	0	0	0
CA00g29530	0	0	0.0648251	0	0	0
CA00g29540	0	0	0	0.187803	0.150368	0
CA00g29550	0	0	0	0	0	0
CA00g29560	0	0	0	0	0	0
CA00g29570	0	0	0	0	0	0
CA00g29580	0	0	0	0	0	0
CA00g29590	0	0	0	0.125202	0	0
CA00g29600	0	0	0	0	0	0
CA00g29610	0	0	0.194475	0	0	0
CA00g29620	0	0.570048	0	0	0	0
CA00g29630	0.940447	0.488613	0.453776	0.500808	0.451104	1.29395
CA00g29640	0	0	0	0	0	0
CA00g29650	0.104494	0.570048	0.12965	0.751212	1.20294	0.941051
CA00g29660	0	0.0814355	0.324126	0.187803	0.150368	0.352894
CA00g29670	0	0	0	0	0	0
CA00g29680	12.8528	11.8081	17.7621	16.4641	13.5331	14.8216
CA00g29690	1.67191	3.50172	2.0744	4.06907	1.65405	1.52921
CA00g29700	154.233	179.158	160.961	159.695	155.33	159.979
CA00g29710	0	0	0	0	0	0
CA00g29720	0	0.0814355	0	0	0	0
CA00g29730	0	0	0	0	0	0
CA00g29740	25.601	15.7985	20.0958	16.7771	12.6309	12.3513
CA00g29750	0	0	0.0648251	0	0	0
CA00g29760	0	0	0	0	0	0
CA00g29770	0	0	0	0	0	0
CA00g29780	0	0	0.259301	0.062601	0	0
CA00g29790	0	0	0	0	0	0
CA00g29800	76.4897	76.6308	97.1729	95.5918	89.9201	89.988
CA00g29810	0.417976	0.0814355	0.388951	0.688611	0.150368	0.705789
CA00g29820	0.104494	0.244306	0	0	0	0
CA00g29830	29.7808	26.9551	30.4678	29.2347	24.8107	19.0563
CA00g29840	0	0	0	0	0	0
CA00g29850	0.940447	0.732919	0.259301	0.563409	1.95479	0.941051
CA00g29860	1.35842	0.0814355	1.5558	0.313005	0.601472	0.352894
CA00g29870	8.882	6.75914	10.9554	9.82836	11.1272	10.7045
CA00g29880	0	0	0	0	0.300736	0.117631
CA00g29890	2.19438	1.87302	3.43573	7.44952	6.31546	4.70526
CA00g29900	0	0	0	0	0	0
CA00g29910	0.313482	0	0.12965	0	0.300736	0.352894
CA00g29920	0	0	0	0	0.300736	0.705789
CA00g29930	0.104494	0	0.12965	0	0	0
CA00g29940	0.52247	0.325742	0.0648251	0.375606	0	0
CA00g29950	0.104494	0.244306	0.12965	0.250404	0	0
CA00g29960	0	0.0814355	0	0.187803	0	0
CA00g29970	98.6424	103.83	112.536	99.2852	111.573	107.75
CA00g29980	16.5101	13.1925	16.5952	17.1527	15.7887	15.8802
CA00g29990	10.2404	10.5866	12.3816	9.20235	9.77393	8.11657
CA00g30000	0.104494	0.244306	0.583426	0.250404	0.300736	0.235263
CA00g30010	5.74717	9.12077	7.39007	10.5796	11.8791	8.11657
CA00g30020	0.52247	0.732919	0.453776	2.06583	1.95479	0.82342
CA00g30030	1.7764	2.28019	1.10203	1.50242	1.05258	2.58789
CA00g30040	0	0	0	0	0	0
CA00g30050	0	0	0	0	0	0
CA00g30060	17.2415	19.3002	29.6251	24.1014	27.6677	23.4087
CA00g30070	0.731459	0.244306	0.583426	0.939015	0.451104	0.352894
CA00g30080	0	0	0	0	0	0
CA00g30090	0	0	0	0	0	0
CA00g30100	29.3628	35.6687	38.3117	31.8639	41.9527	42.5826
CA00g30110	5.01572	8.87647	9.20517	4.56987	6.76657	5.52868
CA00g30120	0	0	0	0	0	0
CA00g30130	0	0	0	0	0	0
CA00g30140	0	0	0	0	0	0
CA00g30150	3.13482	1.87302	2.13923	2.87965	1.50368	0.588157
CA00g30160	0	0	0	0	0	0
CA00g30170	0	0	0	0	0	0
CA00g30180	0	0	0	0.125202	0	0
CA00g30190	0.626964	0.570048	1.42615	1.25202	2.85699	1.64684
CA00g30200	1.25393	0.0814355	0.777902	0.813813	1.20294	1.17631
CA00g30210	634.279	1019	646.566	544.942	517.717	507.344
CA00g30220	45.1414	44.0566	41.164	42.4435	28.5699	33.4073
CA00g30230	0.313482	0	0.324126	0.250404	0	0.117631
CA00g30240	5.3292	7.49206	8.29762	10.3292	2.85699	2.94079
CA00g30250	0	0	0	0.062601	0	0
CA00g31240	42.7381	37.9489	53.0918	47.076	43.4564	45.2881
CA00g31250	0	0.0814355	0	0	0	0
CA00g31260	18.0775	20.6846	17.7621	18.7177	9.77393	10.1163
CA00g31270	22.1527	17.9972	16.8545	24.3518	23.1567	24.1144
CA00g31280	0	0	0	0	0	0
CA00g31290	136.156	160.672	126.344	110.866	128.414	121.866
CA00g31300	8.7775	11.8081	4.47293	5.32109	2.25552	3.41131
CA00g31310	0.835953	0.325742	0.518601	0.688611	0.451104	0.352894
CA00g31320	5.3292	8.22498	3.82468	3.31785	8.87172	6.11683
CA00g31330	16.6146	14.5769	11.3444	10.6422	8.87172	10.9397
CA00g31340	0	0	0	0	0	0
CA00g31350	0.626964	0.89579	0.842727	1.06422	0.751841	1.17631
CA00g31360	0.52247	0.0814355	0.12965	0.125202	0.601472	0.235263
CA00g31370	11.9123	5.37474	8.75139	11.6438	6.6162	6.94025
CA00g31380	3.86628	4.39751	6.15839	6.1349	4.96215	4.82289
CA00g31390	15.3606	13.274	12.5113	11.2682	15.3375	10.8221
CA00g31400	6.16515	7.73637	4.86189	4.31947	5.26288	5.29341
CA00g32320	74.0863	75.0021	80.9018	68.9237	66.6131	65.9912
CA00g32330	0	0	0	0	0	0
CA00g32340	0	0	0	0	0	0
CA00g32350	0	0.162871	0	0	0	0
CA00g32360	1.88089	1.3844	5.70461	7.44952	6.16509	5.52868
CA00g32370	0	0	0	0	0	0
CA00g32380	0.313482	0.407177	0	0	0	0
CA00g32390	21.2123	21.7433	18.2807	14.899	16.0894	17.5271
CA00g32400	97.911	85.833	99.1825	99.2226	99.3933	87.0473
CA00g32410	51.7246	50.5714	52.5084	54.7133	46.3134	45.1705
CA00g32420	30.0943	25.3264	21.9757	20.7209	21.653	19.5268
CA00g32430	16.8235	10.098	13.2243	18.5925	14.1346	13.6452
CA00g32440	231.663	233.801	184.363	172.466	152.624	153.038
CA00g32450	1.25393	1.05866	1.42615	4.00647	0.751841	0.82342
CA00g32460	16.0921	7.00345	14.456	16.4641	9.02209	9.29288
CA00g32470	0.52247	0.244306	7.19559	5.82189	3.15773	2.235
CA00g32480	17.2415	11.971	13.2892	12.6454	12.7813	13.7629
CA00g32490	28.5269	30.864	32.1533	36.6216	30.6751	26.1142
CA00g32500	9.09099	5.049	6.48251	7.01131	1.95479	1.99973
CA00g32510	75.9672	82.4127	72.28	65.4807	68.2671	66.1089
CA00g32520	3.03033	1.46584	2.65783	2.81705	1.65405	1.05868
CA00g32530	0	0	0	0	0	0
CA00g32540	9.82244	12.2968	7.97349	4.63248	8.42061	8.46946
CA00g32550	8.67301	9.12077	11.7982	10.5796	11.2776	9.52815
CA00g32560	53.71	59.7736	49.2023	43.6329	43.0053	54.3457
CA00g32570	1.25393	0.488613	0.648251	0.313005	0	0
CA00g32580	20.1674	17.5086	12.252	12.395	10.0747	15.7626
CA00g32590	1.35842	2.28019	3.95433	4.44467	2.55626	3.05842
CA00g32600	7.94155	8.46929	5.18601	8.45114	5.11252	5.52868
CA00g32610	0	0	0	0	0	0
CA00g32620	0	0	0	0	0	0
CA00g32630	0	0	0	0	0	0
CA00g32640	142.425	114.905	142.81	170.275	153.375	132.453
CA00g32650	0	0.0814355	0.194475	0	0.150368	0
CA00g32660	0	0.0814355	0.194475	0	0	0.117631
CA00g32670	14.9427	17.4272	16.2063	13.4592	22.7056	23.9968
CA00g32680	0	0.651484	0	0.125202	0.451104	0.117631
CA00g32690	0	0	0	0	0	0
CA00g32700	0.208988	0.814355	0	0	0.150368	0.235263
CA00g32710	0	0	0	0	0	0
CA00g32720	0	0	0.518601	0.375606	0	0
CA00g32730	53.9189	43.7308	48.3596	45.0101	39.8476	43.406
CA00g32740	56.9493	50.0014	59.6391	55.5897	51.1252	51.6402
CA00g32750	192.478	194.956	203.032	224.925	237.431	256.789
CA00g32760	261.026	227.368	288.472	310.939	280.587	286.08
CA00g32770	27.3774	22.8834	29.301	30.0485	42.4038	35.1718
CA00g32780	20.1674	17.9158	25.217	22.0356	23.7582	23.0558
CA00g32790	52.247	48.2912	68.974	66.7327	54.1325	53.7576
CA00g32800	0.417976	0.0814355	0.12965	0.751212	1.05258	0.588157
CA00g32810	0	0	0	0	0	0
CA00g32820	0	0	0	0.062601	0	0
CA00g32830	0	0.162871	0.194475	0.187803	0.150368	0
CA00g32840	1.14943	0.732919	0.972377	2.12843	1.05258	1.64684
CA00g32850	0	0	0	0	0	0
CA00g32860	0	0	0.0648251	0	0	0
CA00g32870	0	0	0	0	0	0
CA00g32880	0	0	0	0	0	0
CA00g32890	0	0	0	0.125202	0	0
CA00g32900	0.104494	0.814355	0.453776	1.43982	1.05258	0.470526
CA00g32910	0	0	0	0	0	0
CA00g32920	0	0	0	0	0	0
CA00g32930	0	0.570048	0.453776	0.438207	1.50368	0.941051
CA00g32940	0	0	0	0	0	0
CA00g32950	0.208988	0	0	0	0	0
CA00g32960	7.94155	11.0752	9.14035	10.2666	8.72135	8.58709
CA00g32970	0.208988	0	0	0	0	0
CA00g32980	17.555	24.1863	25.4763	31.6135	21.9537	15.9979
CA00g32990	7.31459	6.59627	8.29762	6.4479	3.45847	6.11683
CA00g33000	0	0	0	0	0	0
CA00g33010	0	0	0	0	0.150368	0.470526
CA00g33020	0.417976	0.651484	2.33371	1.87803	1.80442	0.941051
CA00g33030	28.7359	26.9551	35.7187	37.2476	31.4269	30.5842
CA00g33040	130.513	108.798	141.448	140.539	142.399	155.862
CA00g33050	31.6617	32.4927	36.0428	25.5412	33.8328	30.7018
CA00g33060	0	0	0.194475	0.688611	1.80442	1.41158
CA00g33070	35.0055	32.9814	40.5157	38.3744	42.8549	40.3476
CA00g33080	0	0	0	0	0	0
CA00g33090	6.37414	10.098	8.10314	8.20073	4.81178	5.76394
CA00g33100	2.61235	3.99034	5.05636	2.44144	2.25552	1.76447
CA00g33110	56.6358	46.1739	37.7282	35.8704	36.8402	37.6421
CA00g33120	0	0	0.194475	0.438207	0.451104	0.588157
CA00g33130	66.0403	79.1553	81.1611	81.0057	76.8381	72.8138
CA00g33140	113.585	111.078	127.446	113.496	117.588	112.22
CA00g33150	7.31459	6.35197	5.18601	1.43982	4.36068	4.58763
CA00g33160	75.9672	85.9958	68.8443	77.3749	74.1315	73.5196
CA00g33170	114.421	103.912	152.339	199.259	166.006	174.565
CA00g34300	0	0	0	0	0	0
CA00g34310	0	0	0	0	0	0
CA00g34560	0	0	0	0	0	0
CA00g34570	0	0	0	0	0	0
CA00g34580	0	0	0	0	0	0
CA00g34590	0	0	0	0	0	0
CA00g34600	0	0	0	0	0	0
CA00g34610	0	0	0	0	0	0
CA00g34620	0	0	0	0	0	0
CA00g34630	0	0	0	0	0	0
CA00g34640	0	0	0	0	0	0
CA00g34650	0	0	0	0	0	0
CA00g34660	0.208988	0	0	0	0	0
CA00g34670	0	0	0	0	0	0
CA00g34680	3.4483	4.23464	3.04678	1.94063	3.45847	3.52894
CA00g34690	0	0	0	0	0	0
CA00g34700	13.3752	14.5769	14.6505	17.5909	15.4879	15.1745
CA00g34710	1.35842	0.488613	1.62063	2.19104	0.902209	0.470526
CA00g34720	0.417976	0.977226	1.23168	0.313005	0.150368	0.470526
CA00g34730	0.313482	0.0814355	0	0	0	0.117631
CA00g34740	95.7166	86.8916	86.0878	80.3797	89.1683	85.4004
CA00g34750	1.56741	0.0814355	0.518601	0.250404	0.601472	0.470526
CA00g34760	0.417976	0	0.12965	0.438207	0.150368	0
CA00g34770	77.3256	94.7909	74.2248	63.0392	75.3344	77.0486
CA00g34780	8.35953	7.16632	6.74181	5.69669	3.3081	4.82289
CA00g34790	0.940447	0.407177	0.12965	0.438207	0	0.117631
CA00g34800	0	0.162871	0.0648251	1.06422	1.05258	0.705789
CA00g34810	0	0	0	0	0	0
CA00g34820	0	0	0	0	0	0
CA00g34830	0.626964	0.244306	0	0	0.150368	0.117631
CA00g34840	0.835953	1.79158	1.62063	0.939015	0.300736	0.588157
CA00g34850	0	0.407177	0	0.062601	0	0.470526
CA00g36180	0	0	0	0	0	0
CA00g36190	0	0	0	0	0	0
CA00g36200	166.459	134.206	186.502	199.196	156.383	151.039
CA00g36210	5.53819	4.80469	6.80664	5.63409	5.11252	6.94025
CA00g36220	0	0.488613	0.259301	0.125202	0.751841	0.82342
CA00g36230	0	0	0	0	0	0
CA00g36240	0.313482	0.325742	0.453776	0.187803	0.451104	0.82342
CA00g36250	0	0	0	0	0	0
CA00g36260	3.76179	3.42029	4.60259	4.82028	2.55626	1.64684
CA00g36270	28.7359	22.2319	30.8568	37.5606	26.7655	22.9381
CA00g36280	0	0	0	0	0	0
CA00g36290	0.104494	0	0.12965	0	0.300736	0.235263
CA00g36460	0	0	0	0.375606	0.451104	0.470526
CA00g36470	0.104494	0	0	0	0	0
CA00g36480	0	0	0	0	0	0
CA00g36490	0.208988	0	0.0648251	0	0	0
CA00g36500	0	0	0	0	0	0
CA00g36510	81.9234	86.3216	58.8612	41.2541	75.4848	75.0488
CA00g36520	15.8831	13.6812	15.947	10.204	12.1798	13.1747
CA00g36530	0	0	0	0.062601	0	0
CA00g36540	89.5514	65.7184	120.834	120.695	120.445	112.103
CA00g36550	23.1977	19.6259	33.1256	21.7852	21.0515	22.5852
CA00g36560	10.5539	5.37474	11.4741	12.0194	6.46583	8.46946
CA00g36570	183.805	156.112	192.596	202.577	179.088	171.507
CA00g36580	7.1056	8.46929	7.64937	8.32594	10.225	11.7631
CA00g36590	5.85167	3.01311	3.88951	2.25364	4.51104	3.05842
CA00g36600	0	0	0	0.062601	0	0
CA00g36610	3.97078	0.814355	2.59301	3.00485	1.95479	1.41158
CA00g36620	0	0	0	0	0	0
CA00g36630	0	0	0	0	0	0
CA00g36640	14.8382	19.3816	22.2998	19.2811	20.9012	20.7031
CA00g36650	184.955	202.53	206.144	183.797	185.404	175.388
CA00g36660	0	0.814355	0.583426	1.43982	0.601472	0.82342
CA00g36670	19.8539	3.09455	7.19559	4.50727	4.05994	2.82315
CA00g36680	0.417976	0	0.907552	0.500808	0	0
CA00g36690	32.7066	16.7757	19.0586	20.7835	22.856	24.3497
CA00g36700	6.26964	5.70048	7.51972	9.39015	6.31546	8.2342
CA00g36710	20.4808	12.5411	15.3636	14.0226	14.1346	16.7037
CA00g36720	21.9438	19.7074	25.6059	31.3005	27.0663	21.056
CA00g36730	32.2887	34.6101	35.5242	32.1143	28.5699	26.3494
CA00g36740	11.8078	13.0297	14.2615	14.5234	11.1272	14.7039
CA00g36750	8.56851	5.78192	6.67699	8.45114	7.66877	9.41051
CA00g36760	4.59774	3.42029	2.46336	5.63409	3.60883	4.46999
CA00g36770	0	0	0	0	0	0
CA00g36780	1.25393	0.814355	2.0744	1.06422	0.601472	0.470526
CA00g36790	7.1056	8.71359	9.98307	7.57472	8.57098	7.29315
CA00g36800	65.3088	62.1353	52.7677	49.0166	45.7119	41.0534
CA00g36810	0	0	0	0	0	0
CA00g36820	0.835953	0.732919	2.33371	2.12843	1.65405	1.41158
CA00g36830	1.67191	2.44306	1.49098	1.31462	1.35331	1.29395
CA00g36840	0	0	0	0.375606	0.451104	0.588157
CA00g36850	24.8696	25.5707	28.5879	24.477	31.2766	29.5255
CA00g36860	8.56851	7.24776	14.1967	12.3324	8.87172	10.3516
CA00g36870	57.2628	48.2912	52.1194	60.8482	49.7718	50.3462
CA00g36880	18.182	12.6225	13.6133	10.204	24.0589	17.2918
CA00g36890	1.56741	0.570048	0.972377	0.813813	0.300736	0.82342
CA00g36900	0	0	0	0	0	0
CA00g36910	22.2572	15.3913	16.6601	18.2795	20.9012	20.7031
CA00g36920	86.8346	70.9303	85.9581	79.3781	86.7624	90.4586
CA00g36930	0	0.244306	0	0.125202	0.150368	0
CA00g36940	0	0	0	0	0	0
CA00g39890	0	0	0	0	0	0
CA00g39900	0	0	0	0	0	0
CA00g39910	0	0	0.0648251	1.06422	0	0
CA00g39920	0.208988	0.0814355	0	0.187803	0	0
CA00g39930	0	0	0	0	0	0
CA00g40890	0	0	0	0	0	0
CA00g40900	0.52247	0	0.388951	0.813813	1.35331	2.58789
CA00g40910	0	0	0	0	0	0
CA00g40920	2.29887	2.44306	3.24126	2.00323	3.90957	3.29368
CA00g40930	1.46292	3.50172	2.13923	1.56503	1.95479	1.64684
CA00g40940	56.4268	54.236	61.3246	75.8724	41.8023	47.2878
CA00g40950	7.52357	7.8178	8.68657	6.1975	8.27025	6.46973
CA00g40960	0.313482	1.54727	2.13923	1.81543	0	0
CA00g40970	0	0	0	0	0	0
CA00g40980	96.448	106.355	95.9412	87.3284	119.843	109.28
CA00g40990	0	0	0	0	0	0
CA00g41000	11.0764	7.41063	7.71419	11.143	7.81914	6.46973
CA00g41010	0	0	0	0	0	0
CA00g41020	0	0	0	0	0	0
CA00g41030	0	0	0	0	0	0
CA00g41040	0	0	0	0	0	0
CA00g41050	180.984	180.787	159.535	180.854	134.88	151.509
CA00g41060	220.483	216.537	237.649	258.229	296.075	292.902
CA00g41070	109.301	115.15	92.0517	82.0073	78.7929	85.2828
CA00g41080	30.9302	27.118	22.4943	26.9184	12.7813	10.2339
CA00g41090	0	0	0	0	0	0
CA00g41100	0.313482	0	0	0	0	0
CA00g41110	0	0	0	0	0	0
CA00g41120	5.95616	5.53761	3.24126	5.63409	8.72135	7.29315
CA00g41130	0	0	0	0	0	0
CA00g41140	0	0	0	0	0	0
CA00g41150	2.61235	1.54727	2.65783	1.94063	3.90957	1.41158
CA00g41160	61.129	49.3499	44.859	44.0085	31.2766	35.76
CA00g41170	13.0618	10.098	10.761	10.8926	16.2398	11.175
CA00g41180	120.482	110.101	117.593	115.436	107.363	111.75
CA00g41190	1.56741	0.732919	0.842727	1.87803	0.751841	1.99973
CA00g41200	6.16515	4.56039	10.6313	7.82513	8.27025	8.70473
CA00g41210	2.61235	2.36163	0.972377	2.50404	1.35331	2.82315
CA00g41220	1.88089	0.732919	1.75028	2.12843	0	0.117631
CA00g41230	120.9	82.7384	125.631	110.679	95.3334	100.692
CA00g41240	10.0314	12.3782	11.6685	15.7129	12.1798	11.9984
CA00g41250	0	0	0.453776	0	0	0
CA00g41260	17.137	24.1863	17.1787	20.4079	11.8791	11.9984
CA00g41270	60.6066	48.0469	49.3319	57.7807	37.7424	43.406
CA00g41280	0	0	0.324126	0	0	0
CA00g41290	0	0	0	0.313005	0	0
CA00g41300	0	0	0	0	0	0
CA00g41310	0.104494	0	0.259301	0	0.601472	0.588157
CA00g41320	0.940447	1.30297	1.8151	1.56503	0.601472	0.352894
CA00g41330	47.2313	45.6039	42.6549	42.1305	43.306	43.1707
CA00g41340	0	0	0	0	0	0
CA00g41350	1.25393	1.46584	4.99154	3.50566	13.082	13.7629
CA00g41360	0.731459	1.87302	2.78748	1.75283	0.601472	0.352894
CA00g41370	21.3168	23.0462	21.7812	26.8558	20.6004	17.88
CA00g41380	56.3223	62.7053	87.7732	78.0635	78.1914	68.2262
CA00g41390	85.9986	94.4651	81.1611	78.6895	77.4396	83.1654
CA00g41400	14.9427	14.2512	14.9098	12.9584	11.7287	9.52815
CA00g41410	9.09099	7.8178	7.71419	6.94871	10.225	11.7631
CA00g41420	0.417976	0.0814355	0.0648251	0.125202	0	0
CA00g41430	0.417976	0.325742	0.453776	0.187803	1.50368	2.11737
CA00g41440	11.7033	12.4596	11.4741	14.0852	10.8265	12.8218
CA00g41450	0.731459	1.1401	0.648251	1.00162	0.751841	1.17631
CA00g41460	0	0	0	0.187803	0	0
CA00g41470	46.0819	49.4313	56.8517	56.2157	56.5384	56.5807
CA00g41480	14.9427	9.36508	10.4368	10.5796	8.72135	8.35183
CA00g41490	50.8886	48.3727	42.9791	42.3809	41.5016	38.3478
CA00g41500	26.5415	21.5804	21.3923	21.7852	28.7203	26.3494
CA00g41510	12.3303	14.3326	12.252	10.1414	9.02209	9.29288
CA00g41520	22.6752	18.4858	17.7621	19.8445	18.6456	19.1739
CA00g41530	33.6471	29.9682	32.9312	36.559	34.8854	34.9365
CA00g41540	3.65729	3.9089	9.20517	6.0723	5.56362	3.52894
CA00g41550	5.01572	6.10766	5.63979	5.69669	8.27025	9.05762
CA00g41560	0	0	0	0	0	0
CA00g41780	6.16515	5.37474	5.70461	3.50566	4.81178	5.41105
CA00g41790	0	0	0	0	0	0
CA00g41940	3.65729	9.77226	8.29762	4.88288	3.3081	2.94079
CA00g41950	0	0	0	0	0	0
CA00g41960	0	0	0	0	0	0
CA00g42430	0.208988	1.3844	1.75028	0.563409	0.300736	0.235263
CA00g42440	3.86628	2.5245	2.26888	1.43982	1.35331	1.41158
CA00g42450	0.208988	0.325742	0.388951	0.813813	0.300736	0
CA00g42460	0	0	0	0	0	0
CA00g42470	4.59774	2.85024	16.4008	23.1624	2.40589	1.64684
CA00g42480	0	0	0	0	0	0
CA00g42490	9.82244	12.5411	12.252	9.32755	10.9769	10.7045
CA00g42500	0	0	0	0	0	0
CA00g42510	0	0	0	0	0	0
CA00g42520	11.5988	13.1111	9.39965	7.88773	15.3375	11.5279
CA00g42530	27.3774	20.3589	15.8822	20.9087	18.796	18.9387
CA00g42540	0	0	0	0	0	0
CA00g42910	10.5539	11.1567	11.2147	10.7048	11.2776	9.88104
CA00g42920	0	0	0	0	0	0
CA00g42930	451.623	373.789	324.255	347.498	324.795	339.367
CA00g42940	28.1089	26.1408	34.2277	29.0469	28.7203	35.4071
CA00g42950	0	0	0	0	0	0
CA00g42960	56.8448	52.2001	57.111	65.0425	49.1704	53.8752
CA00g42970	66.2492	49.187	49.0078	42.5687	44.509	50.3462
CA00g42980	0.731459	0.244306	0.12965	0.500808	1.05258	0
CA00g42990	0.52247	1.71014	2.39853	1.62763	3.90957	3.99947
CA00g43000	80.3559	74.2691	79.6053	82.0699	86.0106	88.1059
CA00g43010	79.2065	71.3375	83.2355	76.9993	53.9822	44.8176
CA00g43020	70.1155	72.8033	57.7592	56.2783	56.9895	59.8744
CA00g43030	1.46292	3.17598	1.0372	0.500808	1.20294	1.52921
CA00g43040	16.1966	13.9255	25.5411	27.5444	24.8107	24.585
CA00g43050	172.206	166.128	162.128	161.072	169.164	178.329
CA00g43060	0	0	0	0	0	0
CA00g43070	9.61346	5.53761	12.3168	14.1478	8.27025	7.41078
CA00g43080	0	0	0	0	0	0
CA00g43090	0	0	0	0.375606	0.300736	0.352894
CA00g43100	16.3011	13.5183	12.5761	11.2056	12.4806	13.6452
CA00g43110	239.605	285.92	206.274	217.539	219.237	215.265
CA00g43120	22.8842	19.4631	18.0214	23.0372	23.9085	20.4679
CA00g43130	0	0	0	0	0	0
CA00g43140	0.940447	0.162871	0	0	0	0
CA00g43150	0	0	0	0	0	0
CA00g43160	0	0	0	0	0	0
CA00g43170	1.67191	1.3844	2.46336	3.69346	0.300736	0.82342
CA00g43180	14.7337	13.0297	12.4464	13.3966	13.8339	11.9984
CA00g43190	0	0	0	0	0	0
CA00g43200	0	0	0	0	0	0
CA00g43210	2.19438	1.71014	2.26888	2.62924	2.10515	2.47026
CA00g43220	0	0	0.453776	0.62601	0	0
CA00g43230	49.9482	45.1152	37.7282	50.5816	40.5994	37.8773
CA00g43760	0	0	0	0.062601	0	0
CA00g43770	0	0	0	0	0	0
CA00g43780	0.104494	0.244306	0.194475	0.062601	0.150368	0.352894
CA00g43790	0.104494	0	0.0648251	0.250404	0	0
CA00g43800	0	0	0	0.563409	0.300736	0.82342
CA00g43810	0.313482	0.0814355	0	0	0.150368	0
CA00g43820	129.259	121.746	145.921	117.753	131.722	121.16
CA00g43830	0	0	0	0	0	0
CA00g43840	0.104494	0.570048	1.23168	1.69023	1.05258	1.17631
CA00g43850	0.104494	0.325742	0.324126	0.187803	3.00736	2.70552
CA00g43860	30.4078	20.3589	28.3286	28.7339	32.7802	33.1721
CA00g43870	13.7932	14.3326	14.3912	15.4625	19.5479	19.6444
CA00g43880	0.104494	0	0.713077	0.062601	0.150368	0.588157
CA00g43890	123.93	125.085	112.731	112.807	117.588	112.573
CA00g43900	0	0	0	0	0	0
CA00g43910	0	0	0	0	0	0
CA00g43920	0.104494	0.244306	0.388951	0.125202	0.150368	0
CA00g43930	49.2167	40.0662	51.2119	40.8785	38.4942	42.8178
CA00g43940	3.34381	5.61905	3.43573	2.81705	3.15773	2.82315
CA00g43950	0	0.977226	1.5558	1.00162	1.20294	1.64684
CA00g43960	0	0	0	0	0	0
CA00g43970	0	0	0	0	0	0
CA00g43980	0	0	0	0	0	0
CA00g43990	0.313482	0.244306	0.453776	0.313005	0	0.117631
CA00g44000	0	0	0	0	0	0
CA00g44010	112.749	97.3968	106.184	108.988	102.401	102.927
CA00g44020	21.8393	28.1767	28.3934	35.9956	27.0663	33.1721
CA00g44030	4.49325	4.15321	7.13077	4.06907	4.36068	3.99947
CA00g44040	19.6449	17.9972	17.6973	20.6583	17.5931	19.4092
CA00g44050	2.61235	1.87302	1.68545	2.25364	3.3081	2.70552
CA00g44060	0	0	0	0	0	0
CA00g44070	85.0582	64.9041	75.5861	76.4984	71.4249	73.2844
CA00g44080	12.9573	11.1567	11.0851	8.13813	9.62356	10.3516
CA00g44090	7.31459	9.44651	10.0479	6.82351	10.8265	10.1163
CA00g44100	17.2415	17.5901	19.9013	21.5348	17.7434	16.4684
CA00g44110	0.313482	0	0	0	0	0
CA00g44120	0.626964	0	0.0648251	0	0.300736	0.705789
CA00g44340	1.04494	0.162871	0.324126	0.187803	0.150368	0.235263
CA00g44350	2.08988	1.3844	2.20405	1.18942	0.601472	0.588157
CA00g44360	0	0	0	0	0	0
CA00g44370	0	0	0	0	0	0
CA00g44380	0	0	0	0	0	0
CA00g44390	0	0	0	0	0	0
CA00g44640	0	0	0	0	0	0
CA00g44650	0	0	6.74181	6.94871	3.15773	2.70552
CA00g44660	0	0	0	0.62601	0	0
CA00g44670	39.4988	35.8316	34.5518	41.9427	35.3365	30.3489
CA00g44680	58.3077	60.3437	58.213	70.8644	104.506	92.1054
CA00g44690	68.9661	66.6142	65.0196	55.5271	48.7193	49.8757
CA00g44700	32.6022	27.118	37.6634	35.0566	27.6677	25.8789
CA00g44710	0.52247	0.570048	0.583426	0.062601	0.150368	0.117631
CA00g44720	20.8988	19.7888	18.9289	17.9665	14.285	18.821
CA00g44730	3.23932	2.60593	2.46336	3.00485	2.55626	2.82315
CA00g45170	1.04494	1.71014	1.10203	2.50404	0.751841	0.470526
CA00g45180	0	0	0	0	0	0
CA00g45190	36.7819	23.4534	46.2852	40.3151	40.7498	39.4065
CA00g45200	9.92694	8.63216	10.5017	10.7674	7.36804	5.88157
CA00g45210	56.7403	58.5521	54.5179	56.7791	56.9895	55.4044
CA00g45220	1096.87	1073.24	950.401	910.594	941.605	1010.57
CA00g45230	2.50786	2.11732	4.60259	5.50889	5.11252	6.82262
CA00g45240	0.52247	0.570048	1.10203	1.37722	0.902209	1.99973
CA00g45250	87.566	69.7088	243.743	216.412	375.62	337.014
CA00g45260	68.6526	53.0145	46.8038	55.8401	40.9001	35.1718
CA00g45270	1.7764	1.87302	0.583426	0.688611	1.20294	1.76447
CA00g45280	0.104494	1.22153	1.36133	1.12682	1.05258	0.82342
CA00g45290	2.61235	2.28019	1.87993	2.81705	2.55626	2.11737
CA00g45300	9.71795	12.1339	7.26042	10.204	9.77393	9.05762
CA00g45310	18.8089	18.893	18.2159	18.8429	20.6004	18.821
CA00g45320	441.905	367.111	538.114	669.205	524.334	500.875
CA00g45330	127.796	170.2	131.141	105.545	127.963	138.452
CA00g45340	49.9482	52.6073	54.7772	61.9124	53.0799	59.1686
CA00g45350	77.7436	72.3147	67.6126	67.6091	79.8455	81.5186
CA00g45360	0	0	0	0	0	0
CA00g45370	0	0	0	0	0	0
CA00g45380	129.155	125.166	132.956	122.761	111.573	106.574
CA00g45390	0	0.0814355	0	0	0	0
CA00g45400	1.46292	0.570048	2.65783	0.563409	0.150368	0.588157
CA00g45410	30.0943	30.5383	34.3573	31.5509	31.878	34.9365
CA00g45420	17.764	14.3326	22.4295	17.5909	16.5405	16.9389
CA00g45430	10.7629	13.3554	17.3083	15.0868	14.5857	12.5866
CA00g45440	0	0	0	0	0	0
CA00g45450	0.104494	0	0	0.062601	0	0
CA00g45460	0	0	0	0	0	0
CA00g45470	0	0	0	0	0	0
CA00g45480	0	0	0	0	0	0
CA00g45490	0	0.0814355	0	0.313005	0	0
CA00g45500	0	0	0	0.313005	0	0
CA00g45510	0	0	0	0	0	0
CA00g45520	5.64268	6.4334	4.14881	3.31785	3.60883	3.64657
CA00g45530	0	0	0	0.500808	0.451104	0.588157
CA00g45540	0	0	0	0	0.300736	0.117631
CA00g45550	1.67191	1.22153	1.75028	3.50566	2.40589	2.235
CA00g45560	0	0.244306	0	0.062601	0	0.117631
CA00g45570	0.52247	0	0.518601	0.375606	0.451104	0.235263
CA00g45580	0	0.0814355	0.518601	0.313005	0.300736	0
CA00g45590	0	0	6.87147	5.13328	7.81914	6.94025
CA00g46070	0	0.0814355	0	0	0	0
CA00g46080	104.076	111.892	80.6425	90.5211	103.604	97.0459
CA00g46090	0.208988	0.570048	0.713077	2.50404	1.05258	1.52921
CA00g46100	41.4842	35.1801	28.6527	30.1737	29.9233	32.9368
CA00g46110	126.96	87.5431	117.722	122.448	118.34	124.572
CA00g46120	0.417976	0	0.583426	0	0	0.117631
CA00g46130	47.9628	54.7246	37.4041	44.5719	47.5163	50.2286
CA00g46140	0.52247	0.488613	0.12965	0.125202	0	0
CA00g46150	18.5999	15.3099	13.0947	14.8364	15.939	13.6452
CA00g46160	38.4538	38.8447	27.0321	22.4738	23.4574	20.4679
CA00g46170	0	0	0	0	0	0
CA00g46180	0	0	0	0	0	0
CA00g46190	0	0	0	0	0	0
CA00g46200	33.8561	36.8088	41.6177	42.6313	32.7802	40.1123
CA00g46210	0.208988	0.162871	0.453776	0.563409	0	0
CA00g46220	0	0	0	0	0	0
CA00g46230	76.4897	83.7971	88.3567	124.639	94.2808	92.1054
CA00g46240	0	0	0	0	0	0
CA00g46250	0	0	0	0	0	0
CA00g46260	0	0	0	0	0	0
CA00g46270	0	0	0	0	0	0
CA00g46670	22.7797	26.3037	19.8365	16.6519	13.6835	12.5866
CA00g46680	14.1067	17.5086	18.9289	14.7738	17.2923	15.4097
CA00g46770	2.40336	1.1401	1.36133	1.62763	2.40589	1.52921
CA00g46780	0.417976	0.89579	0.648251	0.500808	0.601472	0.470526
CA00g46790	3.23932	5.45618	5.63979	6.63571	5.86436	5.76394
CA00g46800	4.59774	5.70048	3.04678	6.4479	3.90957	5.17578
CA00g46810	11.7033	9.36508	11.2147	7.19912	4.36068	4.58763
CA00g46820	117.347	120.199	137.883	137.66	136.234	125.395
CA00g46830	32.8111	36.4017	30.5326	34.3054	15.4879	14.9392
CA00g46840	0	0	0.0648251	0	0	0
CA00g46850	4.49325	3.17598	10.3072	8.20073	14.7361	13.7629
CA00g46860	7.73256	8.63216	12.1871	11.0178	11.2776	12.4689
CA00g46870	18.7044	17.5086	20.9385	22.286	17.4427	19.9973
CA00g46880	0	0	0	0	0	0
CA00g46890	0	0	0.0648251	0.187803	0.751841	0.705789
CA00g46900	12.5393	16.6943	20.4847	20.1575	26.4648	23.4087
CA00g46910	0.835953	0.732919	0.777902	0.438207	0.300736	0.117631
CA00g47390	12.5393	15.9614	17.6973	21.66	18.4953	17.7623
CA00g47400	0	0.651484	0.194475	0	0	0
CA00g47410	20.3763	18.5673	14.9098	14.2104	18.9464	22.1147
CA00g47420	0.940447	0.325742	0	0.250404	0.451104	0
CA00g47430	0	0	0.12965	0	0	0
CA00g47440	0	0	0.194475	0.062601	0	0.235263
CA00g47450	0	0.0814355	0.0648251	0	0	0
CA00g47460	0	0	0	0	0	0
CA00g47470	0.626964	0.651484	0.583426	0.375606	0.300736	0.352894
CA00g47480	1.35842	1.3844	0.972377	1.18942	2.55626	2.58789
CA00g47490	87.1481	80.8654	158.822	104.669	119.843	111.279
CA00g47500	5.64268	5.049	8.62174	9.07715	6.91693	6.94025
CA00g47510	4.70223	3.58316	5.44531	4.19427	2.70663	3.88184
CA00g47520	0	0	0	0	0	0
CA00g47530	0.313482	0	0	0.125202	0	0.117631
CA00g47540	14.4202	9.52795	17.5028	11.2056	14.5857	17.1742
CA00g47550	7.73256	3.6646	4.60259	5.50889	6.6162	7.17552
CA00g47560	0.104494	0	0	0	0	0
CA00g47570	0	0	0	0	0	0
CA00g47580	1.46292	0.570048	0.259301	0.563409	0.751841	1.17631
CA00g48500	14.6292	12.6225	31.505	30.7371	41.652	38.1126
CA00g49150	0	0	0	0	0	0
CA00g49160	0	0	0	0	0	0
CA00g49170	0	0	0	0	0	0
CA00g49180	0	0	0	0	0	0
CA00g49190	0	0.0814355	0	0	0	0
CA00g49200	0.731459	1.46584	0.713077	0.62601	0.902209	1.76447
CA00g49210	0.940447	0	0.259301	0.813813	0	0
CA00g49220	0	0	0	0	0	0
CA00g49230	0	0	0	0	0	0
CA00g49240	0	0	0	0	0	0
CA00g49250	0	0	0	0	0	0
CA00g49260	0	0	0	0	0	0
CA00g49270	0.208988	0.732919	0.324126	0.876414	2.85699	0.82342
CA00g49280	25.3921	32.167	27.2266	28.1079	34.735	31.7605
CA00g49290	48.3808	44.9524	50.7581	50.519	61.9517	61.8741
CA00g49300	0	0	0	0	0	0
CA00g49310	0	0	0	0	0	0
CA00g49320	0	0	0	0	0	0
CA00g49330	0	0	0	0	0	0
CA00g49340	0.208988	0	0.12965	0.751212	0.150368	0
CA00g49350	0	0	0	0	0	0
CA00g49360	0	0.0814355	0.0648251	0	0	0
CA00g49370	1.88089	4.47895	2.78748	2.44144	4.36068	3.88184
CA00g49380	1.88089	0.570048	4.66741	6.3227	7.36804	8.82236
CA00g49390	76.9076	58.3892	64.6307	65.5433	63.0042	66.4618
CA00g49400	20.3763	17.8344	16.2711	16.3389	10.8265	10.4692
CA00g49410	2.50786	3.09455	3.75986	2.69184	2.55626	2.82315
CA00g49420	415.468	375.092	316.087	328.28	367.199	375.127
CA00g49430	0	0	0	0	0	0
CA00g49440	0.731459	1.1401	0.194475	0.939015	0.300736	0.235263
CA00g49910	0	0	0	0	0	0
CA00g49920	0	0.0814355	0	0.062601	0	0
CA00g49930	0	0	0	0	0	0
CA00g49940	4.70223	5.78192	5.89909	3.19265	5.56362	5.52868
CA00g49950	0	0	0	0	0	0
CA00g49960	0	0	0	0	0	0
CA00g49970	0.104494	0	0	0	0	0
CA00g49980	275.864	306.93	272.525	275.82	266.302	278.904
CA00g49990	8.46402	5.53761	6.61216	7.19912	9.02209	7.05789
CA00g50000	0	0	0	0	0	0
CA00g50010	0	0	0	0	0	0
CA00g50020	0	0	0	0	0	0
CA00g50030	0	0	0	0	0	0
CA00g50040	107.315	109.368	113.703	127.581	119.994	116.69
CA00g50050	0.104494	0	0	0	0	0
CA00g50060	51.5156	42.8351	51.6656	50.3938	47.5163	44.2294
CA00g50070	87.3571	77.0379	85.2451	83.8228	92.4764	81.7538
CA00g50080	0	0	0	0	0	0.117631
CA00g50090	44.41	29.2353	33.5794	35.1818	39.5468	38.8184
CA00g50100	5.2247	7.08488	4.08398	6.1975	4.81178	5.52868
CA00g50110	0	0	0	0	0	0
CA00g50120	0	0	0	0	0	0
CA00g50130	41.9021	46.9068	57.7592	60.8482	50.223	49.7581
CA00g50140	14.1067	9.20221	12.6409	9.89096	11.8791	10.2339
CA00g50150	0	0.162871	0	0.062601	0	0
CA00g50160	0	0	0	0	0	0
CA00g50170	0	0	0	0	0	0
CA00g50180	0	0	0	0	0	0
CA00g50190	0	0	0	0	0	0
CA00g50200	4.91122	5.61905	7.64937	8.95195	5.71399	5.64631
CA00g50210	0.940447	0.977226	0.259301	0.438207	0.150368	0.352894
CA00g50220	0	0	0	0	0	0
CA00g50230	0.835953	0.977226	7.26042	5.38369	2.85699	2.47026
CA00g50240	9.29997	3.9089	11.4741	14.586	10.9769	8.93999
CA00g50250	8.7775	9.93513	9.39965	7.76253	6.46583	6.58736
CA00g50260	0	0	0	0	0	0
CA00g50270	4.91122	3.99034	4.79706	2.81705	5.56362	3.64657
CA00g50480	0	0	0	0	0	0
CA00g50490	104.181	94.8723	118.111	110.053	98.4911	94.3404
CA00g50500	165.519	169.793	156.877	144.483	152.022	143.04
CA00g50510	1.04494	0.89579	1.2965	1.50242	0.150368	0.470526
CA00g50520	121.527	117.593	122.649	131.462	116.836	109.044
CA00g50530	170.639	112.055	180.279	174.031	217.583	224.558
CA00g50540	43.574	40.6363	43.4328	44.4467	39.2461	39.8771
CA00g50550	16.8235	16.8571	21.0033	21.1591	20.7508	23.0558
CA00g50560	30.4078	20.766	34.098	38.437	26.1641	31.8781
CA00g50570	2.92583	1.3844	2.13923	1.81543	1.20294	1.17631
CA00g50580	0	0	0	0	0	0
CA00g50590	0.313482	0	0	0	0	0
CA00g51850	0	0	0	0	0	0
CA00g51860	18.8089	17.5086	24.3094	21.5974	19.0968	17.5271
CA00g51870	3.65729	2.76881	7.26042	6.69831	7.96951	7.76367
CA00g51880	3.76179	3.17598	4.73224	4.44467	6.31546	5.17578
CA00g51890	0	0.244306	0.12965	0	0.150368	0.117631
CA00g51900	143.993	114.335	168.675	203.391	142.549	155.391
CA00g51910	6.26964	6.4334	5.96391	9.70316	9.17246	8.82236
CA00g51920	12.6438	13.9255	12.7706	13.647	9.32282	9.52815
CA00g51930	4.49325	1.95445	1.87993	2.87965	2.55626	3.41131
CA00g51940	14.0022	12.3782	24.5039	27.7323	16.3901	15.7626
CA00g51950	66.3537	44.6266	57.8889	57.7807	44.3586	45.0528
CA00g51960	39.3943	33.6328	37.5986	37.6232	61.8013	50.6991
CA00g51970	0	0.162871	0.194475	0.125202	0	0
CA00g51980	0	0	0	0	0	0
CA00g51990	163.011	125.981	145.857	141.666	150.669	147.98
CA00g52000	6.89661	7.16632	7.26042	7.51212	8.72135	6.82262
CA00g52010	91.5368	88.0317	99.3121	91.5853	90.3712	84.1065
CA00g52020	0	0.0814355	0.194475	0	0	0
CA00g52030	1.14943	0.732919	0.972377	2.44144	1.65405	1.64684
CA00g52040	2.08988	1.46584	3.75986	2.37884	0.601472	0.941051
CA00g52050	0	0	0	0.500808	0	0
CA00g52060	1.67191	1.46584	2.78748	2.19104	3.90957	2.11737
CA00g52070	42.7381	37.9489	42.4605	38.8752	36.8402	35.76
CA00g52080	0.104494	0.162871	0	0.125202	0	0
CA00g52090	2.61235	2.36163	2.72266	2.25364	2.55626	1.05868
CA00g52100	129.468	111.322	98.7287	101.101	91.4238	88.1059
CA00g52110	6.79212	7.41063	5.05636	5.75929	6.46583	5.88157
CA00g52120	1.35842	0.651484	0.972377	0.876414	1.80442	1.99973
CA00g52130	3.23932	3.99034	2.46336	1.94063	3.00736	1.76447
CA00g52140	1261.03	1269.25	1442.04	1502.99	1091.97	1070.56
CA00g52150	114.943	124.433	144.495	127.518	136.083	131.865
CA00g52160	580.465	625.587	835.661	934.884	450.503	469.82
CA00g52170	92.4773	85.9144	78.1143	71.24	63.1546	63.8739
CA00g52180	0.52247	0	0.194475	0.125202	0	0
CA00g52190	1.46292	0	0	0	0.150368	0
CA00g52200	0	0	0	0	0	0
CA00g52210	0	0	0	0	0	0
CA00g52220	32.1842	21.3361	24.828	20.5957	22.2545	18.4681
CA00g52230	25.601	21.9061	24.8929	16.9023	28.7203	26.4671
CA00g52240	0	0	0	0	0	0
CA00g52250	1.67191	0.89579	1.23168	1.06422	1.50368	1.05868
CA00g52260	0	0.0814355	0	0	0	0
CA00g52270	0	0	0	0	0	0
CA00g52280	0	0	3.30608	0.751212	3.60883	5.29341
CA00g52290	3.4483	1.79158	2.00958	3.38045	2.10515	2.58789
CA00g52300	43.6785	34.6915	37.3393	35.933	48.4185	46.1115
CA00g52310	0	0	0	0	0	0
CA00g52320	95.7166	83.3899	87.3195	82.6333	93.2282	99.8691
CA00g52330	58.6212	46.011	55.1662	54.8385	47.6667	45.7586
CA00g52340	4.91122	5.45618	7.26042	10.5796	4.21031	5.29341
CA00g52350	0.417976	1.79158	1.8151	0.438207	0.902209	0.352894
CA00g52360	1.04494	1.54727	4.14881	2.37884	0.902209	2.11737
CA00g52370	0.104494	0	0.0648251	0.062601	0	0
CA00g52380	2.40336	1.46584	1.87993	1.37722	1.05258	0.588157
CA00g52390	4.91122	2.60593	3.63021	5.00808	3.15773	2.82315
CA00g52400	1.56741	0.0814355	1.68545	2.06583	1.50368	0.941051
CA00g52410	7.0011	6.75914	6.28804	5.19588	3.15773	5.29341
CA00g52420	89.3424	84.1228	50.6933	53.0857	64.2072	72.3433
CA00g52430	49.3212	48.6984	52.5084	51.9588	39.9979	45.8763
CA00g52440	4.28426	5.53761	4.53776	1.87803	3.3081	2.47026
CA00g52450	22.0483	21.6618	16.6601	12.8958	14.1346	13.5276
CA00g52460	0.313482	0.325742	0.194475	0.62601	0.601472	0.235263
CA00g52470	0.208988	0.325742	0.194475	0.313005	0.902209	0.352894
CA00g52480	11.4943	12.7854	11.9927	10.517	11.1272	11.6455
CA00g52490	35.4235	33.1442	42.0067	36.8094	30.8255	31.7605
CA00g52500	0	0.0814355	0	0.438207	0	0
CA00g52510	42.2156	34.8544	29.9492	33.3037	38.4942	34.8189
CA00g52520	0	0	0	0	0	0
CA00g52530	0	0	0	0	0	0
CA00g52540	106.166	93.4065	79.5405	82.5707	90.8223	90.8115
CA00g52550	31.6617	31.1898	22.3647	17.3405	19.0968	18.3505
CA00g52560	2.82134	2.44306	3.43573	5.13328	3.60883	4.46999
CA00g52570	54.0234	46.011	65.0844	61.2238	65.4101	68.3439
CA00g52580	0	0	0	0.250404	0	0.235263
CA00g52590	0.940447	3.50172	1.8151	0.813813	1.05258	0.352894
CA00g52600	0.626964	0.244306	1.94475	3.25525	1.35331	0.352894
CA00g52610	0.417976	1.1401	1.94475	0.438207	2.10515	2.11737
CA00g52620	0	0.0814355	0.259301	0.125202	0	0
CA00g52630	0	0	0.0648251	0	0	0
CA00g52640	15.7786	18.6487	14.2615	12.5828	9.77393	13.6452
CA00g52650	56.1133	44.8709	46.4796	44.0711	51.2755	57.5218
CA00g52660	74.8178	63.5197	105.471	107.674	114.581	122.337
CA00g52670	57.4717	35.343	63.399	66.1693	55.6362	46.6997
CA00g52680	58.8302	55.2132	57.4999	59.471	61.5006	60.6978
CA00g52690	0	0	0	0	0	0
CA00g52700	0.104494	0	0	0.375606	0	0
CA00g53540	2.50786	3.6646	1.94475	3.69346	1.35331	1.99973
CA00g53550	10.8674	11.6453	10.6961	9.89096	13.8339	17.4095
CA00g53560	0.940447	1.30297	1.16685	3.63086	2.70663	1.17631
CA00g53570	43.8875	44.9524	51.4063	51.9588	42.7045	40.1123
CA00g53580	10.8674	9.77226	7.97349	8.45114	8.27025	6.58736
CA00g53590	0	0	0	0	0	0
CA00g53600	0	0	0	0	0	0
CA00g53610	0.208988	0.162871	0	1.31462	0.601472	0.352894
CA00g53620	7.94155	7.73637	13.8078	15.2746	9.17246	10.3516
CA00g53630	0	0.162871	0	0	0	0
CA00g53640	0	0	0	0	0	0
CA00g53650	102.195	121.339	123.168	107.048	105.258	97.1636
CA00g53660	0	0.488613	0	0.375606	0.300736	0.352894
CA00g53670	48.5897	35.343	38.8951	27.7949	39.8476	37.2892
CA00g53680	1.7764	0.89579	0.12965	0.313005	1.05258	1.29395
CA00g53690	0	0	0	0	0	0
CA00g53700	27.064	14.6584	23.9205	45.0727	53.2303	55.7573
CA00g53710	8.46402	5.37474	8.49209	11.0804	14.285	15.0568
CA00g53720	18.4955	27.6881	23.0129	22.9746	27.6677	28.1139
CA00g53730	0	0	0	0	0	0
CA00g53740	0.731459	0.732919	3.17643	1.62763	1.95479	1.99973
CA00g53750	0.940447	1.05866	2.00958	1.31462	0.300736	0.352894
CA00g53760	0	0	0	0	0	0
CA00g53770	14.7337	14.8213	18.4752	21.1591	19.999	19.2916
CA00g53780	178.894	125.085	279.461	246.711	294.571	279.728
CA00g53790	34.2741	41.4506	38.2468	40.1899	34.8854	34.1131
CA00g53800	0	0.732919	0	0	0.150368	0
CA00g53810	0	0	0	0	0	0
CA00g53820	1.46292	1.05866	1.36133	1.56503	1.35331	0.82342
CA00g53830	159.353	157.089	150.654	156.941	141.045	151.392
CA00g53840	10.2404	8.55072	9.20517	12.4576	8.72135	8.46946
CA00g53850	13.2707	21.7433	13.9374	17.7161	15.4879	13.7629
CA00g53860	1.56741	0.732919	2.00958	0.375606	0.902209	1.05868
CA00g53870	38.0358	40.1477	31.894	28.9217	41.3512	35.76
CA00g53880	36.7819	28.3395	40.4509	38.124	57.1399	54.4633
CA00g53890	51.4111	47.5583	40.775	34.2428	39.2461	32.3486
CA00g53900	0	0.0814355	0.0648251	0	0	0
CA00g53910	0	0	0	0	0	0
CA00g53920	0.417976	1.1401	0.518601	0.688611	0.751841	1.17631
CA00g53930	0	0	0	0	0	0
CA00g53940	0	0.162871	0	0	0.300736	0.82342
CA00g53950	3.65729	3.50172	5.51014	3.44306	21.8034	21.6442
CA00g53960	0.208988	0.244306	0	0	0	0
CA00g53970	33.1246	31.5155	39.2192	29.1721	38.4942	34.3484
CA00g53980	59.8751	60.6694	68.2609	56.9669	62.102	63.9915
CA00g53990	5.85167	4.56039	7.77902	7.88773	6.6162	6.23447
CA00g54000	1.35842	0.244306	0.388951	0.813813	0.451104	0
CA00g54010	1.7764	1.87302	2.0744	2.37884	2.55626	2.70552
CA00g54020	0	0	0	0	0	0
CA00g54030	1.04494	0.814355	1.2965	0.62601	1.35331	1.52921
CA00g54040	0	0	0	0	0	0
CA00g54050	9.50896	4.39751	6.09356	7.82513	10.9769	12.5866
CA00g54060	245.352	166.454	380.588	352.632	484.336	438.412
CA00g54070	441.174	406.2	340.721	325.713	361.485	370.539
CA00g54080	0	0	0	0	0	0
CA00g54090	0	0.488613	1.23168	0	0.601472	0.82342
CA00g54100	92.0593	58.1449	45.4424	44.1963	67.6657	69.2849
CA00g54110	0	0	0	0	0	0
CA00g54120	1.14943	0.325742	0.842727	0.688611	1.35331	0.352894
CA00g54130	35.737	40.0662	33.9684	34.055	33.3817	34.3484
CA00g54140	13.7932	8.9579	14.456	11.456	12.4806	13.6452
CA00g54150	28.6314	31.6784	29.4306	30.5493	31.5773	33.4073
CA00g54160	1.98539	0.89579	2.72266	1.87803	1.35331	1.05868
CA00g54170	160.294	153.18	168.805	180.228	163.3	166.801
CA00g54180	7.94155	7.16632	9.5293	9.57796	15.0368	11.175
CA00g54190	0.52247	0.570048	0.259301	0.438207	0.902209	0.470526
CA00g54200	1.56741	0.570048	0.259301	0.062601	0	0.235263
CA00g54210	2.08988	0.651484	0.388951	0.250404	0.751841	1.05868
CA00g54220	29.9898	33.47	32.2181	33.3037	33.9832	35.1718
CA00g54230	0	0	0	0	0	0
CA00g54630	0.208988	1.05866	1.2965	1.25202	0.150368	0.588157
CA00g54640	0	0.732919	2.39853	0.688611	1.20294	0.470526
CA00g54650	0	0.0814355	0	0	0	0
CA00g54660	26.019	23.8606	31.0512	26.042	25.8633	21.1737
CA00g54670	0	0	0	0	0	0
CA00g54680	0.835953	1.54727	0.259301	1.31462	0.601472	0.470526
CA00g54690	74.9223	47.2326	70.8539	67.4839	121.648	111.632
CA00g55780	0	0	0	0	0	0
CA00g55790	4.70223	7.00345	7.77902	7.82513	3.3081	4.1171
CA00g55800	114.317	108.553	80.6425	72.492	91.2734	92.5759
CA00g55810	0	0	0	0	0	0
CA00g56330	2.40336	0.488613	0.453776	0.751212	0.150368	0.235263
CA00g56340	0	0	0	0	0	0
CA00g56350	0.104494	0	0	0	0	0
CA00g56360	104.703	76.0607	87.8381	96.8438	78.0411	75.2841
CA00g56370	8.67301	12.1339	10.8906	7.01131	9.47319	7.41078
CA00g56380	0	0	0	0	0	0
CA00g56390	8.7775	7.89924	10.6313	14.2104	12.9317	12.4689
CA00g56400	1.14943	1.22153	0.12965	2.12843	1.80442	3.29368
CA00g56930	0.313482	0.89579	2.33371	1.87803	3.45847	2.47026
CA00g56940	0	0	0	0	0	0
CA00g56950	0.940447	1.30297	0.583426	0.876414	0.902209	1.64684
CA00g56960	0	0	0	0	0	0
CA00g56970	0.104494	0	0	0.187803	0	0
CA00g56980	0	0	0	0	0	0
CA00g56990	1.56741	0.814355	0.583426	0	1.05258	0.470526
CA00g57030	26.9595	20.9289	21.7812	21.8478	13.9842	14.8216
CA00g57040	44.619	45.5224	56.6572	66.1067	59.0947	69.7554
CA00g57050	0.104494	3.25742	0.907552	1.18942	0.902209	0.82342
CA00g57060	0	0.407177	0.12965	0.062601	0	0
CA00g57070	0.417976	0.0814355	0	0	0	0
CA00g57080	1.25393	0.244306	1.0372	1.81543	3.15773	3.41131
CA00g57090	84.3267	96.1753	97.497	91.3349	72.1767	81.048
CA00g57100	0	0	0.259301	0	0	0.117631
CA00g57110	1.35842	1.1401	0.907552	2.25364	1.95479	2.235
CA00g57120	0	0	0.12965	0	0	0.117631
CA00g57130	0.104494	0	0	0	0	0
CA00g57140	0	0	0	0	0	0
CA00g57150	0	0	0	0	0	0
CA00g57160	0	0	0	0	1.20294	0.588157
CA00g57170	1.04494	0.651484	1.0372	1.81543	0.300736	0
CA00g57180	128.214	69.7902	120.64	144.483	132.174	118.22
CA00g57190	2.82134	1.05866	3.04678	3.00485	1.65405	2.70552
CA00g57200	0	0	0	0.313005	0	0
CA00g57210	0.104494	0.732919	0.194475	0	0	0
CA00g57220	1.04494	0.651484	0.324126	0.876414	1.80442	3.05842
CA00g57230	0	0	0	0	0	0
CA00g57240	0	0	0	0	0	0
CA00g57250	0	0	0	0	0	0
CA00g57260	0.731459	0.325742	1.0372	1.94063	1.20294	1.99973
CA00g57270	0.104494	0.0814355	0.12965	0	0.451104	0
CA00g57280	0.417976	1.1401	0.972377	2.69184	1.65405	2.70552
CA00g57290	0	0	0	0	0	0
CA00g57300	0	0	0	0	0	0
CA00g57310	5.2247	3.99034	3.95433	5.57149	2.70663	3.64657
CA00g57320	73.4593	60.0179	78.957	92.2113	66.4627	69.8731
CA00g57330	2.40336	4.56039	2.65783	2.25364	2.55626	2.82315
CA00g57340	1.04494	1.3844	0.583426	0.939015	1.20294	0.588157
CA00g57350	0.104494	0.244306	0.972377	0.375606	0.300736	0.588157
CA00g57360	0	0.325742	0.194475	0.125202	0	0.117631
CA00g57370	0	0	0.194475	0	0	0
CA00g57380	0	0	0	0	0	0
CA00g57390	0	0	0	0	0	0
CA00g57400	0	0	0	0	0	0
CA00g57410	0.417976	0.162871	0.0648251	0	0.150368	0
CA00g57420	0	0	0.713077	0.187803	0	0.117631
CA00g57430	0.208988	0.244306	0.259301	0.250404	0	0.117631
CA00g57440	0.626964	0.407177	0.388951	0.187803	0.601472	0.352894
CA00g57450	13.3752	14.4141	16.5304	14.899	17.8938	15.645
CA00g57460	0	0	0.0648251	0	0.300736	0
CA00g57470	81.4009	55.0504	53.9345	55.9027	80.4469	76.9309
CA00g57480	0	0	0	0	0	0
CA00g57490	0.313482	0	1.62063	0.250404	1.65405	1.64684
CA00g57500	176.804	174.516	155.516	145.234	165.255	168.213
CA00g57510	7.41908	7.00345	2.72266	4.06907	2.40589	4.23473
CA00g57520	12.8528	15.9614	15.1691	16.2137	13.8339	12.9395
CA00g57530	1.46292	2.60593	1.75028	2.06583	3.60883	4.35236
CA00g57540	23.5112	18.6487	19.9013	14.9616	15.1872	18.4681
CA00g57550	35.8415	26.2222	40.8398	41.2541	43.6068	42.2297
CA00g57560	0	0	0	0	0	0
CA00g57570	0	0	0	0.062601	0	0
CA00g57580	9.40447	6.67771	8.03832	6.1349	5.86436	7.05789
CA00g57590	0	0	0	0	0	0
CA00g57600	0.208988	1.30297	1.68545	0.876414	1.05258	1.52921
CA00g57610	0	0	0.518601	0	0.451104	0.705789
CA00g57620	9.19548	4.31608	5.44531	4.25687	4.36068	4.35236
CA00g57630	0	0	0	0	0	0
CA00g57640	0.104494	0.732919	0.324126	0.187803	0.150368	0.117631
CA00g57650	0.626964	1.62871	0.259301	0.813813	0.150368	0
CA00g57660	0	0	0	0	0	0
CA00g57670	0	0	0	0	0	0
CA00g57680	0	0	0	0	0	0
CA00g57690	0	0	0	0.062601	0	0
CA00g57870	2.08988	0	0	0	0	0
CA00g57880	1.35842	0.488613	1.62063	1.18942	1.35331	1.41158
CA00g57890	6.37414	3.9089	6.93629	4.50727	6.16509	5.29341
CA00g57900	21.8393	19.7074	20.031	21.0965	17.5931	17.5271
CA00g57910	0	0	0	0	0	0
CA00g57920	1.04494	0.325742	2.46336	1.18942	1.35331	1.05868
CA00g57930	4.59774	4.31608	7.13077	4.56987	10.8265	13.9981
CA00g57940	0.52247	0.0814355	0	0.125202	0.150368	0.235263
CA00g57950	0	0	0.324126	0	0	0
CA00g57960	14.8382	12.5411	11.3444	9.89096	11.428	9.64578
CA00g57970	14.6292	11.401	18.54	21.3469	22.856	16.586
CA00g57980	5.74717	13.9255	15.2987	11.3934	9.47319	10.5868
CA00g57990	5.53819	8.14355	7.26042	4.13167	9.32282	7.52841
CA00g58000	0	0	0	0	0	0
CA00g58010	0	0	0	0	0	0
CA00g58020	0.313482	0	0	0	0	0
CA00g58030	84.2222	52.0373	63.3342	58.5946	74.5826	67.5204
CA00g58040	0.731459	0.570048	0.453776	1.00162	0.451104	0.235263
CA00g58050	1.67191	1.30297	0.777902	2.81705	0.751841	0
CA00g58060	12.0168	12.3782	18.54	18.0291	17.4427	17.9976
CA00g58070	3.4483	2.76881	2.78748	2.44144	3.00736	2.11737
CA00g58080	1.04494	0.651484	0.907552	0.62601	1.80442	1.52921
CA00g58090	0.208988	0.0814355	0.0648251	0.313005	0.150368	0.470526
CA00g58100	0.313482	1.05866	2.20405	0.813813	2.55626	2.94079
CA00g58110	0.208988	0.325742	0.259301	0.500808	0.150368	0.352894
CA00g58120	0	0	0	0.313005	0	0
CA00g58130	0	0	0	0	0	0
CA00g58140	0	0	0	0	0	0
CA00g58150	0	0	0	0	0	0
CA00g58160	0	0	0	0	0.150368	0.235263
CA00g58170	6.79212	5.86335	10.8906	7.63732	12.0294	14.1158
CA00g58180	15.1516	23.6977	28.9768	29.0469	17.4427	19.7621
CA00g58190	0.104494	0.0814355	0.648251	0.876414	0.150368	0
CA00g58200	51.8291	74.1063	48.6837	51.5206	34.8854	31.7605
CA00g58210	307.631	222.237	275.183	223.235	349.907	347.954
CA00g58220	0.52247	0.244306	0.194475	0	0.150368	0.117631
CA00g58230	0.731459	0.244306	0.259301	0	1.50368	0.941051
CA00g58240	0	0	0	0	0	0
CA00g58250	0	0	0	0	0	0
CA00g58260	1.35842	0.488613	1.5558	0.751212	1.35331	0.352894
CA00g58270	1.56741	0.89579	3.88951	1.12682	4.51104	1.76447
CA00g58280	0	0	0	0	0	0
CA00g58290	0.313482	0.89579	0.453776	1.37722	0	0.235263
CA00g58300	0	0	0	0	0	0
CA00g58310	0.104494	0.162871	0.12965	0	0	0
CA00g58320	0.52247	1.79158	1.36133	0.813813	0.451104	0.705789
CA00g58330	1.35842	1.46584	1.10203	1.75283	1.65405	1.99973
CA00g58340	1.56741	1.71014	2.26888	4.06907	1.35331	1.29395
CA00g58350	122.781	140.395	107.675	101.163	117.738	121.278
CA00g58360	6.58313	7.08488	6.22321	8.38854	4.21031	3.29368
CA00g58370	24.6606	24.5121	23.726	30.2989	20.9012	23.7615
CA00g58380	0.313482	0.651484	0.713077	1.37722	0	0.117631
CA00g58390	1.88089	0.977226	1.68545	2.44144	1.20294	1.29395
CA00g58400	0	0	0	0	0	0
CA00g58410	36.2594	33.0628	31.505	26.042	34.4343	30.7018
CA00g58420	24.4516	20.2774	18.7993	16.7145	6.76657	6.82262
CA00g58430	0	0	0	0	0	0
CA00g58440	0	0	0	0	0	0
CA00g58450	0	0	0	0	0	0
CA00g58460	0.313482	0.325742	0	0	0.150368	0.352894
CA00g58470	21.7348	13.1925	18.7345	22.3486	17.2923	15.5273
CA00g58480	7.83706	9.69082	7.58454	6.76091	6.31546	7.88131
CA00g58490	86.9391	71.6632	81.6797	83.2594	71.876	66.5794
CA00g58500	74.5043	65.8813	46.4148	46.5752	43.6068	44.8176
CA00g58510	0	0	0	0.250404	0.150368	0
CA00g58520	323.618	364.179	314.661	323.585	280.286	275.61
CA00g58530	170.534	136.974	110.721	126.83	128.114	130.1
CA00g58540	2.29887	0.89579	0.453776	1.18942	0	0.705789
CA00g58550	8.56851	6.10766	12.3816	11.0178	16.0894	12.9395
CA00g58560	5.2247	2.68737	3.11161	3.19265	2.55626	3.41131
CA00g58570	0	0	0	0	0	0
CA00g58580	0	0.814355	0	0	0	0
CA00g58590	0	0	0	0	0	0
CA00g58600	0	0	0	0.876414	0	0
CA00g58610	0	0	0	0	0	0
CA00g58620	0	0	0	0	0	0
CA00g58630	0	0	0	0	0	0
CA00g58640	0	0	0.0648251	0	0.601472	0.470526
CA00g58650	0	0	0	0	0	0
CA00g58660	797.29	930.156	909.562	910.156	830.182	848.475
CA00g58670	0	1.62871	0.259301	0	0.300736	0
CA00g58680	0	0	0	0	0	0
CA00g58690	0	0	0	0	0	0
CA00g58700	0	0	0	0	0	0
CA00g58710	0	0	0	0	0	0
CA00g58720	0	0	0	0	0	0
CA00g58730	0	0	0	0	0	0
CA00g58740	0	0	0.0648251	0.062601	0	0
CA00g58750	0	0	0	0	0	0
CA00g58760	0	0	0	0	0	0
CA00g58770	0	0	0	0	0	0
CA00g58780	0	0	0	0	0	0
CA00g58790	0	0.162871	0	0	0	0
CA00g58800	39.6033	22.069	25.6059	28.3583	26.0137	27.2905
CA00g58810	0	0	0	0	0	0
CA00g58820	0	0	0	0	0	0
CA00g59290	22.8842	21.0103	22.8833	18.6551	19.3975	19.2916
CA00g59300	54.4414	61.5652	73.0579	68.1725	63.305	57.4041
CA00g59310	128.632	112.625	120.704	143.482	124.655	125.748
CA00g59320	0.52247	0.0814355	0.259301	0.438207	0.150368	0.117631
CA00g59330	1.67191	1.95445	5.57496	6.57311	5.56362	5.41105
CA00g59340	24.9741	25.4079	40.1268	38.1866	39.3964	42.5826
CA00g59350	0	0.244306	1.2965	0.939015	0.902209	0.941051
CA00g59360	41.6931	26.7923	44.859	35.6826	43.6068	42.4649
CA00g59370	2.40336	1.71014	4.92671	4.88288	4.51104	1.8821
CA00g59380	2.71685	3.09455	3.30608	3.88126	1.95479	1.52921
CA00g59390	5.12021	3.09455	12.0575	9.26495	8.87172	9.05762
CA00g59400	603.871	476.56	621.543	606.228	448.849	476.995
CA00g59410	22.7797	17.3458	28.1989	32.2395	29.4722	26.2318
CA00g59420	0	0	0	0	0	0
CA00g59430	0.208988	0.407177	0.388951	0	0.300736	0.117631
CA00g59440	0	0	0	0.187803	0.150368	0
CA00g59450	0.313482	0	0	0	0	0
CA00g59690	0.208988	0	0	0	0	0
CA00g59700	0.835953	0.814355	0.648251	0.250404	0.451104	0.352894
CA00g59710	0	0	0	0	0	0
CA00g59720	0.52247	0.407177	0.583426	0.250404	0.150368	0
CA00g60360	0.731459	1.22153	0.324126	0.062601	0.902209	0.470526
CA00g60370	0	0.488613	0.0648251	1.06422	0	0
CA00g60380	6.58313	4.07177	5.31566	4.82028	2.85699	2.70552
CA00g60390	15.2561	17.6715	18.2159	18.0917	12.1798	16.4684
CA00g60400	1.35842	0.325742	0.259301	2.25364	0.601472	0.235263
CA00g60410	0	0	0	0	0	0
CA00g60420	4.59774	5.37474	6.35286	3.56826	7.51841	7.64604
CA00g60430	2.92583	1.30297	0.842727	1.06422	1.05258	1.41158
CA00g60440	0.626964	0.407177	1.23168	1.06422	0.601472	0.705789
CA00g60450	1027.59	1032.44	819.455	793.718	817.401	806.716
CA00g60460	23.6157	20.6846	13.2243	13.2088	12.7813	13.9981
CA00g60470	261.967	256.033	284.777	250.967	219.838	211.619
CA00g60480	199.27	170.77	199.467	212.781	178.788	180.447
CA00g60490	0.731459	0.977226	0.12965	0.187803	0.150368	0.235263
CA00g60500	30.6168	32.8185	24.3094	22.599	24.9611	29.1726
CA00g60510	26.855	25.7336	26.708	22.9746	27.5174	28.5844
CA00g60520	489.868	350.58	517.305	680.723	450.954	521.342
CA00g60530	77.4301	68.813	75.3268	74.4326	62.7035	62.1094
CA00g60540	51.2021	37.8675	57.8889	81.3187	84.3565	85.0475
CA00g60550	10.0314	8.30642	9.72377	8.20073	10.5258	10.4692
CA00g60560	30.4078	53.9103	28.6527	26.6054	31.1262	28.5844
CA00g60570	0	0	0	0	0	0
CA00g60580	4.28426	9.12077	6.28804	9.13975	11.5783	13.7629
CA00g60590	94.5671	92.6736	121.806	136.47	129.617	120.807
CA00g60600	52.9785	63.9268	69.2333	59.2206	58.0421	63.9915
CA00g60610	0.104494	0	0	0	0	0
CA00g60620	0	0	0	0.062601	0.150368	0.235263
CA00g60630	0.52247	0.732919	0.0648251	0.313005	0.601472	0.588157
CA00g61190	0	0	0	0.062601	0	0
CA00g61200	0	0	0	0	0.150368	0
CA00g61210	0	0	0	0	0	0
CA00g61220	0.208988	0.162871	0.259301	0.125202	0.150368	0.705789
CA00g61450	0	1.05866	0.777902	0.062601	0.300736	0.588157
CA00g61460	0	0	0	0	0	0.352894
CA00g61470	2.61235	2.76881	2.72266	2.31624	2.10515	2.235
CA00g61480	111.704	88.0317	121.742	133.778	136.234	133.394
CA00g61490	0.208988	0.162871	0.583426	0.751212	1.05258	1.17631
CA00g61500	127.587	116.127	107.026	112.369	176.382	150.451
CA00g61510	0	0	0	0	0	0
CA00g61520	0	0	0	0	0	0
CA00g61530	0	0	0	0	0	0
CA00g61540	0	0	0	0	0	0
CA00g61550	0	0	0	0	0	0
CA00g61560	19.9584	16.2057	18.7345	20.5957	8.57098	9.99867
CA00g61570	4.17976	5.2933	4.53776	3.56826	4.96215	5.17578
CA00g61580	1.04494	0.488613	1.8151	0.876414	5.41325	4.58763
CA00g61590	0.417976	0.488613	0.648251	0.250404	1.05258	0.82342
CA00g61600	0	0.162871	0	0	0	0
CA00g61610	0.104494	0	0.194475	0	0.902209	1.29395
CA00g61620	0	0	0	0	0.300736	0
CA00g61630	0.313482	0.570048	0.453776	0.500808	0.451104	1.05868
CA00g61640	1.88089	1.62871	7.06594	3.81866	4.66141	3.99947
CA00g61650	0.417976	1.05866	0.583426	0.438207	0.150368	0.117631
CA00g61660	0	0	0.0648251	0	0	0
CA00g61670	0	0	0	0	0	0
CA00g61680	0	0	0	0	0	0
CA00g61690	3.76179	3.42029	5.18601	4.63248	3.00736	2.235
CA00g61700	8.882	6.92201	9.27	9.82836	7.66877	7.29315
CA00g61710	0	0	0	0	0	0
CA00g61720	0	0	0	0	0	0
CA00g61730	0	0	0	0	0	0
CA00g61740	68.4436	72.559	90.1718	114.122	115.182	103.516
CA00g61750	166.041	139.988	138.855	142.417	124.655	111.515
CA00g61760	0	0	0	0	0	0
CA00g61770	0	0	0.0648251	0	0.751841	0.117631
CA00g61780	0	0	0	0	0	0.117631
CA00g61790	3.34381	1.30297	2.46336	2.62924	2.70663	1.8821
CA00g61800	1.7764	2.5245	0.907552	1.94063	1.95479	1.99973
CA00g61810	0.313482	0.325742	0.194475	0	0.751841	0.470526
CA00g62030	0.417976	0	0	0	0	0
CA00g62040	11.2854	12.0524	15.3636	19.0933	13.9842	11.8808
CA00g62050	14.5247	9.69082	11.863	13.1462	12.3302	12.8218
CA00g62060	37.3044	35.9945	45.6369	44.9475	32.1788	30.1136
CA00g62070	0	0	0	0	0	0
CA00g62080	0	0	0.194475	0	0	0
CA00g62090	0.104494	0.244306	0.259301	0.563409	1.05258	0.588157
CA00g62100	160.921	180.461	201.088	188.366	202.847	209.031
CA00g62110	29.9898	36.4017	44.5349	39.3134	30.5247	26.1142
CA00g62120	47.6493	15.7985	45.7666	56.7791	53.531	49.5228
CA00g62130	308.362	279.079	355.436	351.505	318.48	337.602
CA00g62140	102.3	92.1035	80.0591	82.8837	82.5521	84.2241
CA00g62150	0	0	0	0	0	0
CA00g62160	140.649	142.268	183.196	156.252	138.489	145.981
CA00g62170	1.56741	0	0.194475	0.813813	0.150368	0
CA00g62180	0.52247	0.488613	1.62063	0.939015	0	0
CA00g62190	9.19548	7.32919	6.22321	10.0788	8.72135	8.70473
CA00g62200	133.961	113.521	137.948	124.701	89.7698	89.5175
CA00g62210	0	0	0	0	0	0
CA00g62220	14.7337	15.147	16.7897	13.8974	10.0747	10.4692
CA00g62230	0	0	0	0	0.300736	0.235263
CA00g62240	0	0	0	0	0	0
CA00g62250	15.0471	13.0297	19.1234	23.225	18.4953	17.9976
CA00g62260	128.737	140.965	110.203	107.549	92.6268	95.752
CA00g62270	0	0	0	0	0	0
CA00g62280	0	0	0	0	0.451104	0.235263
CA00g62290	0.104494	0.162871	0	0	0.902209	0.588157
CA00g62300	2.92583	2.11732	4.73224	8.57634	9.17246	7.64604
CA00g62310	15.0471	13.6812	15.1043	15.9007	20.9012	21.2913
CA00g62320	100.628	106.355	91.3386	86.765	89.469	97.2812
CA00g62330	34.692	28.5838	36.2373	37.7484	33.081	32.1134
CA00g62790	0.104494	0.325742	0.12965	0.250404	0	0
CA00g62800	110.764	125.899	99.2473	106.484	118.039	113.161
CA00g62810	3.03033	5.61905	7.19559	4.94548	3.3081	3.29368
CA00g62820	4.91122	2.28019	1.10203	3.63086	1.65405	1.99973
CA00g62830	4.38875	4.96756	4.08398	4.44467	4.66141	3.64657
CA00g62840	18.7044	18.2415	19.4475	17.6535	20.7508	21.2913
CA00g62850	1.25393	0	0.0648251	0.813813	0	0
CA00g62860	0	0	0	0	0	0
CA00g62870	0	0	0	0	0	0
CA00g62880	1.35842	1.46584	4.27846	4.44467	2.40589	2.35263
CA00g62890	2.92583	2.60593	1.23168	0.500808	2.10515	1.76447
CA00g62900	0	0	0	0	0	0
CA00g62910	117.66	119.466	107.804	152.433	124.655	124.572
CA00g62920	0	0	0	0	0	0
CA00g62930	0	0	0	0	0	0
CA00g62940	0.313482	0.325742	0.324126	0	0	0
CA00g62950	3.76179	7.65493	4.27846	6.1349	6.91693	6.58736
CA00g62960	0.940447	2.28019	1.16685	1.94063	0.451104	0.235263
CA00g62970	0	0	0	0	0	0
CA00g62980	37.1999	35.6687	42.9791	38.3118	30.9758	31.29
CA00g62990	0	0	0	0	0	0
CA00g63000	13.6887	9.44651	17.1787	19.5941	15.4879	15.9979
CA00g63010	1.14943	0.162871	0	0	0	0
CA00g63020	38.0358	36.1573	44.9238	42.4435	49.6215	45.1705
CA00g63300	0	0	0	0	0	0
CA00g63310	0	0	0	0	0	0
CA00g63320	0	0	0	0	0	0
CA00g63330	61.965	72.9662	48.943	51.0198	62.7035	59.5215
CA00g63340	0	0.0814355	0.259301	0.563409	0	0
CA00g63350	2.29887	1.05866	4.60259	3.13005	2.85699	3.76421
CA00g63360	627.8	509.297	641.121	710.709	813.792	845.182
CA00g63370	3.13482	1.22153	2.20405	4.38207	1.35331	1.05868
CA00g63380	10.5539	12.1339	8.16797	5.32109	3.45847	3.88184
CA00g63390	0	0	0.0648251	0	0	0
CA00g63400	0.835953	0.244306	0.648251	0.500808	1.95479	1.41158
CA00g63410	7.52357	7.16632	7.19559	9.20235	7.81914	8.58709
CA00g63420	139.604	119.384	208.931	208.587	144.504	170.683
CA00g63430	0	0	0	0	0.300736	0.235263
CA00g63440	0	0	0	0	0	0
CA00g63450	0.208988	0	0.194475	0	0	0
CA00g63460	0	0	0	0	0	0
CA00g63470	3.5528	9.28364	6.54734	6.0723	4.96215	6.82262
CA00g63480	0	0	0	0	0	0
CA00g63490	0	0	0	0	0	0
CA00g63500	156.428	192.921	134.058	120.131	149.917	153.156
CA00g63510	1.35842	0.570048	0.194475	1.31462	0.451104	0.235263
CA00g63740	0	0	0.583426	0.563409	0	0
CA00g63750	25.601	23.2905	30.403	24.2266	23.7582	29.996
CA00g63760	0	0	0	0	0	0
CA00g63770	0	0.0814355	0	0	0.150368	0
CA00g63780	0	0	0	0	0	0
CA00g63790	0	0	0	0	0	0
CA00g63800	0	0	0	0	0	0
CA00g63810	1.7764	1.95445	1.87993	1.25202	3.60883	3.64657
CA00g63820	35.0055	39.1705	35.6538	32.5525	43.4564	38.5831
CA00g63830	27.8999	32.9814	38.7006	37.7484	39.2461	35.76
CA00g63840	0	0	0	0	0	0
CA00g63850	0	0	0.12965	0	0	0
CA00g63860	0	0	0	0	0	0
CA00g63870	19.8539	12.2153	21.5219	22.4112	13.2324	12.3513
CA00g63880	0.104494	0	0.518601	0	0.150368	0
CA00g63890	0.104494	0	0	0	0	0
CA00g63900	1.14943	1.30297	2.52818	2.19104	2.85699	3.17605
CA00g63910	0	0	0	0	0	0
CA00g63920	2.71685	2.11732	2.52818	2.81705	1.65405	1.76447
CA00g63930	0	0	0.12965	0	0	0
CA00g63940	0	0	0	0	0	0
CA00g63950	0	0	0	0.187803	0	0.117631
CA00g63960	0	0	0	0	0.601472	0.82342
CA00g63970	0.104494	0.244306	0.0648251	0.313005	0.300736	0.352894
CA00g63980	6.47863	5.37474	3.24126	5.19588	5.41325	3.29368
CA00g63990	3.97078	0.814355	2.98196	3.81866	2.70663	1.76447
CA00g64000	0.208988	0.162871	0.194475	0.688611	0.300736	0.588157
CA00g64010	0.626964	0.0814355	0.194475	0	0	0.117631
CA00g64020	0.626964	0.488613	1.68545	0.375606	0.300736	0.588157
CA00g64030	29.3628	29.3168	31.3754	27.607	30.9758	30.4665
CA00g64040	35.8415	38.6004	44.47	40.3151	34.4343	35.4071
CA00g64050	0.104494	0.570048	0.259301	1.31462	0.451104	0.941051
CA00g64060	0	0	0.12965	0	0	0
CA00g64070	0	0	0	0	0	0
CA00g64080	122.572	67.2657	62.297	103.104	135.482	117.984
CA00g64090	0	0	0	0	0	0
CA00g64100	0	0	0	0.062601	0	0
CA00g64110	8.98649	7.08488	8.10314	10.7048	9.32282	9.99867
CA00g64120	0.313482	0.325742	0.194475	0.62601	0	0
CA00g64130	7.41908	5.86335	8.29762	12.2072	9.77393	10.9397
CA00g64140	4.49325	3.25742	7.90867	7.63732	10.8265	7.88131
CA00g64150	1.14943	1.1401	1.23168	1.62763	6.6162	4.58763
CA00g64160	38.9763	52.0373	41.6826	40.6907	69.7708	68.2262
CA00g64170	0	0	0	0	0	0
CA00g64180	22.2572	9.36508	170.49	111.931	58.3428	59.4039
CA00g64190	0.417976	1.71014	1.2965	1.37722	0.451104	0.941051
CA00g64200	1.88089	0.814355	3.88951	2.50404	0.751841	1.05868
CA00g64210	18.5999	18.7302	19.642	21.8478	21.653	18.821
CA00g64220	7.0011	7.32919	5.51014	5.25849	4.51104	6.11683
CA00g64230	9.09099	8.71359	9.14035	6.63571	10.5258	11.9984
CA00g64240	106.897	83.3899	90.1718	101.351	103.754	89.3999
CA00g64250	23.1977	20.8475	29.8196	24.164	30.0736	29.5255
CA00g64260	1.14943	3.6646	1.10203	1.31462	2.10515	3.17605
CA00g64270	33.5426	31.1083	32.5422	22.7868	31.1262	37.6421
CA00g64280	223.722	223.133	221.313	222.234	205.102	208.561
CA00g64290	46.6044	42.4279	41.6177	48.954	45.2608	42.9355
CA00g64300	16.4056	15.2284	18.151	22.6616	19.0968	17.2918
CA00g64310	41.9021	39.3333	46.0259	43.8833	43.1556	47.6407
CA00g64320	100.314	94.628	77.9846	99.16	126.61	123.513
CA00g64330	0	0	0	0	0	0
CA00g64340	7.0011	3.6646	5.38049	4.88288	4.21031	3.41131
CA00g64350	10.6584	4.31608	1.36133	1.37722	1.20294	2.11737
CA00g64360	11.7033	7.89924	16.0118	12.5828	13.9842	12.116
CA00g64370	4.91122	5.78192	4.60259	5.13328	4.66141	3.88184
CA00g64380	0	0	0	0	0.150368	0.117631
CA00g64390	0	0	0.0648251	0.187803	0	0
CA00g64400	11.9123	14.5769	14.456	13.021	15.1872	11.5279
CA00g64410	1.25393	1.22153	0.907552	1.06422	1.05258	0.588157
CA00g64420	2.19438	1.79158	3.69503	4.38207	3.7592	2.82315
CA00g64430	57.4717	54.236	51.9249	47.076	53.9822	49.0523
CA00g64440	0	0.162871	0	0	0	0
CA00g64450	2.08988	1.05866	1.87993	1.06422	1.05258	1.64684
CA00g64460	9.50896	3.74603	9.98307	7.07392	8.57098	7.52841
CA00g64470	26.7505	22.4762	33.3201	34.055	23.9085	25.8789
CA00g64480	9.09099	8.87647	17.3731	12.1446	6.76657	9.29288
CA00g64490	15.1516	11.401	19.3179	14.9616	13.3828	13.7629
CA00g64500	10.7629	19.0559	14.3264	12.5202	10.9769	14.8216
CA00g64510	25.7055	19.0559	20.5496	23.4128	21.8034	21.7618
CA00g64520	15.2561	20.0331	14.845	16.7771	13.8339	15.9979
CA00g64530	70.638	62.9496	54.5828	49.8304	45.2608	48.1113
CA00g64540	0	0	1.36133	0.688611	0	0.117631
CA00g64550	0	0	0	0	0	0
CA00g64560	0	0	0	0	0	0
CA00g64570	0	0	0	0	0	0
CA00g64580	12.1213	11.8896	8.23279	11.2056	11.8791	8.11657
CA00g64590	1.14943	0.977226	1.62063	1.81543	0.300736	0.705789
CA00g64600	1.7764	1.79158	3.43573	4.56987	5.71399	7.76367
CA00g64610	12.4348	5.61905	14.7153	12.7706	22.7056	21.7618
CA00g64620	0.417976	0.162871	0.648251	0.500808	0.150368	0
CA00g64630	68.7571	67.2657	74.873	62.9766	73.2293	71.9904
CA00g64640	26.5415	16.2871	27.1617	41.9427	35.0358	33.1721
CA00g64650	8.15054	11.4824	14.9746	13.2714	10.5258	9.29288
CA00g64660	62.8009	41.2063	56.0737	62.5384	64.2072	65.8736
CA00g64670	265.833	256.359	231.166	218.29	248.408	218.912
CA00g64680	19.3314	18.4858	21.8461	17.9665	16.2398	19.6444
CA00g64690	123.512	77.0379	131.66	123.449	228.56	217.383
CA00g64700	17.764	18.893	19.5772	15.7755	26.1641	21.7618
CA00g64710	17.4505	14.5769	16.9194	16.8397	21.653	23.4087
CA00g64720	84.8492	96.2567	86.023	97.5324	59.5458	60.2273
CA00g64730	13.2707	11.0752	13.8726	9.39015	17.142	19.6444
CA00g64740	80.8784	106.925	107.221	114.497	123.151	113.75
CA00g64750	10.8674	11.971	9.39965	5.8845	5.71399	5.88157
CA00g64760	60.7111	71.5818	60.5467	61.7246	57.4406	57.1689
CA00g64770	0	0	0	0	0	0
CA00g64780	0	0.0814355	0.0648251	0	0	0
CA00g64790	0	0	0	0	0	0
CA00g64800	0	0.732919	0.12965	0.125202	0	0
CA00g64810	1.35842	1.95445	3.63021	2.19104	2.70663	2.94079
CA00g64820	0	0	0	0	0	0
CA00g64830	0	0	0	0	0	0
CA00g64840	0	0	0.0648251	0.250404	0	0
CA00g65150	20.8988	12.4596	23.2722	18.3421	25.5626	27.761
CA00g65160	18.5999	18.6487	14.3912	14.6486	21.8034	19.5268
CA00g65170	199.061	160.835	167.573	169.461	149.316	173.389
CA00g65180	0	0	0	0	0	0
CA00g65190	41.0662	37.9489	43.368	44.8849	50.5237	50.4639
CA00g65200	51.0976	49.6756	42.5901	38.5622	36.5395	39.2889
CA00g65210	77.0121	81.354	79.4108	70.6765	73.6804	70.9317
CA00g65220	6.89661	1.79158	2.39853	1.81543	5.41325	5.76394
CA00g65230	0.104494	0.244306	0.194475	0	0.300736	0
CA00g65240	0	0	0.259301	0.187803	0	0
CA00g65250	0.208988	0.325742	0	0	0.150368	0.588157
CA00g65260	12.7483	11.2381	8.29762	9.51535	8.87172	12.2337
CA00g65270	0	0	0	0	0	0
CA00g65280	9.82244	16.2871	11.7982	15.0242	16.0894	13.8805
CA00g65290	127.587	115.557	128.548	136.846	119.242	115.396
CA00g65300	2.50786	2.76881	1.36133	2.06583	1.80442	4.1171
CA00g65310	52.7695	58.2264	60.806	60.5352	64.959	63.1681
CA00g65320	3.23932	0.89579	1.2965	1.81543	0.150368	0.705789
CA00g65330	0	0	0	0.313005	0	0
CA00g65340	0	0	0	0	0	0
CA00g65350	21.0033	14.4141	17.5676	13.4592	10.9769	13.0571
CA00g65610	0	0	0	0	0	0
CA00g65620	0	0	0	0	0	0
CA00g65630	0	0	0	0	0	0
CA00g65640	0	0	0	0	0	0
CA00g65650	0	0	0	0	0	0
CA00g65660	0	0	0	0	0	0
CA00g65670	0	0	0	0	0	0
CA00g65680	0	0	0	0	0	0
CA00g65690	0	0	0	0	0	0
CA00g65700	0	0	0	0	0	0
CA00g65710	0	0	0	0	0	0
CA00g65720	0	0	0	0	0	0
CA00g65730	0	0	0	0	0	0
CA00g65740	0	0	0	0	0	0
CA00g65750	0	0	0	0	0	0
CA00g65980	1.25393	0.488613	1.42615	1.94063	2.25552	1.52921
CA00g65990	0	0	0.0648251	0	0	0
CA00g66000	0	0	0	0	0	0
CA00g66010	35.4235	38.7633	36.1076	34.5558	32.4795	35.8776
CA00g66180	10.3449	4.23464	10.9554	10.0788	10.0747	9.76341
CA00g66190	2.71685	2.85024	3.11161	5.44629	3.45847	2.11737
CA00g66200	0	0	0	0	0	0
CA00g66210	0	0	0	0.062601	0	0.117631
CA00g66220	0	0.0814355	0	0	0	0
CA00g66230	0	0	0	0	0	0
CA00g66240	0	0	0	0	0	0
CA00g66250	0	0	0	0	0	0
CA00g66260	0	0	0	0.062601	0	0
CA00g66450	0	0	0	0	0	0
CA00g66460	0	0	25.3466	29.1095	28.2692	26.7023
CA00g66470	2.29887	2.85024	2.59301	3.69346	1.65405	1.76447
CA00g66680	0	0.244306	0	0	0	0
CA00g66690	0	0.488613	0	0.062601	0.150368	0
CA00g66700	0	0.651484	0.0648251	0	1.20294	0.470526
CA00g66710	1.35842	0.651484	1.62063	1.00162	1.50368	1.05868
CA00g66720	0	0	0	0	0.150368	0.352894
CA00g66730	0	0	0	0	0	0
CA00g66740	0	0	0	0	0	0
CA00g66750	0	0	0	0	0	0
CA00g66760	0	0	0	0	0	0
CA00g66770	0	0	0	0	0	0
CA00g66780	18.0775	17.5901	18.7345	15.7129	14.8864	13.8805
CA00g66790	0.208988	0.407177	0.583426	0.688611	0.300736	0.470526
CA00g66800	0	0	0	0	0	0
CA00g66810	0	0	0	0	0	0
CA00g66820	0	0	0	0	0	0
CA00g66830	0	0	0	0	0	0
CA00g66840	4.28426	2.28019	4.53776	10.517	0.300736	0.941051
CA00g66850	215.676	163.848	140.8	123.449	161.646	166.096
CA00g66860	0	0	0	0	0	0
CA00g66870	49.8437	50.1642	60.806	58.845	57.1399	57.8747
CA00g66880	5.3292	6.27053	7.26042	5.75929	5.56362	6.58736
CA00g66890	197.703	194.631	195.577	169.524	185.254	175.388
CA00g66900	35.11	33.5514	18.7993	16.4015	13.8339	14.351
CA00g66910	45.3504	39.4962	41.7474	33.9298	36.9906	36.9363
CA00g66920	5.74717	4.39751	4.14881	4.44467	5.71399	6.46973
CA00g66930	41.6931	24.6749	37.7282	44.2589	35.4869	30.3489
CA00g66940	52.5605	46.1739	49.0726	41.2541	53.3807	49.5228
CA00g66950	5.74717	6.59627	6.28804	6.94871	7.51841	8.58709
CA00g66960	3.76179	5.21187	7.84384	8.76414	7.36804	7.05789
CA00g66970	573.986	511.496	475.363	434.326	467.645	498.287
CA00g66980	409.199	401.884	459.221	497.991	374.868	395.359
CA00g66990	89.3424	62.1353	68.9091	63.9156	78.3418	83.9888
CA00g67000	2.71685	5.61905	7.19559	4.75768	4.36068	5.29341
CA00g67010	0	0	0	0	0	0
CA00g67020	183.178	168.816	182.094	175.032	162.849	159.391
CA00g67030	0.417976	1.95445	1.62063	0.876414	0.300736	0.235263
CA00g67040	11.9123	12.4596	12.5761	9.01455	12.7813	10.2339
CA00g67050	20.2719	15.0656	14.3264	15.6503	16.3901	16.4684
CA00g67060	0.208988	0	0	0	0	0
CA00g67070	34.0651	28.0952	19.7717	22.0982	20.1493	18.7034
CA00g67080	22.2572	23.8606	32.2829	26.2924	19.3975	21.1737
CA00g67090	5.85167	4.56039	4.47293	4.63248	1.80442	1.52921
CA00g67100	0	0	0	0	0	0
CA00g67110	0	0	0	0	0	0
CA00g67120	42.4246	55.1318	51.7953	52.3345	49.02	45.2881
CA00g67130	0.208988	0.407177	0.324126	0.187803	0.300736	0.117631
CA00g67140	0.417976	0.488613	0.453776	0.125202	0.300736	0.235263
CA00g67150	0	0	0	0	0	0
CA00g67160	35.4235	24.5935	23.9853	29.1721	19.999	21.6442
CA00g67170	248.069	268.411	218.526	229.621	215.177	224.323
CA00g67180	27.4819	20.6846	18.2159	19.4063	19.999	17.2918
CA00g67190	20.2719	78.911	31.7643	17.9039	23.7582	24.8202
CA00g67200	0	0	0.259301	0	0	0
CA00g67210	22.0483	22.3948	22.8833	16.7771	18.9464	23.4087
CA00g67400	12.3303	15.8799	22.1702	20.3453	30.9758	27.8786
CA00g67410	0	0	0	0	0	0
CA00g67420	0	0.0814355	0	0	0.150368	0
CA00g67430	0	0.488613	0	0.062601	0	0
CA00g67440	0.208988	0.814355	0.0648251	0.062601	0.451104	0.117631
CA00g67450	0.104494	0	0	0	0	0
CA00g67460	0	0	0	0	0	0
CA00g67470	9.29997	1.87302	6.15839	4.63248	3.00736	2.235
CA00g67480	1.7764	0.0814355	0.648251	1.37722	0.601472	0.235263
CA00g67490	0.208988	0	0	0	0	0
CA00g67500	13.5842	12.2968	17.1138	18.2795	13.8339	12.9395
CA00g67510	5.74717	3.17598	5.31566	5.07068	3.15773	4.58763
CA00g67520	3210.89	3150.41	1673.79	1436.94	2338.98	2312.52
CA00g67530	33.2291	30.0497	29.1065	25.6038	17.8938	16.1155
CA00g67540	8.46402	8.55072	7.77902	7.32432	4.21031	3.52894
CA00g67550	0	0	0	0	0	0
CA00g67560	106.793	115.801	104.368	96.0926	83.4543	87.8707
CA00g67570	0	0	0	0.062601	0	0.117631
CA00g67580	0	0	0	0	0	0
CA00g67590	0	0	0	0	0	0
CA00g67600	0	0	0	0.313005	0	0.117631
CA00g67610	0	0	0	0	0	0
CA00g67620	0	0	0	0	0	0
CA00g67630	79.4155	72.3147	63.7879	62.8514	69.9212	59.1686
CA00g67640	0	0.162871	0	0.125202	0	0
CA00g67650	28.4224	22.3948	32.5422	32.6151	28.8707	29.996
CA00g67660	0	0	0	0	0	0
CA00g67670	0	0	0	0	0	0
CA00g67680	0	0	0.0648251	0.187803	0	0
CA00g67690	0	0.407177	0	0.062601	0.300736	0.235263
CA00g67700	0.313482	0	0	0	0	0
CA00g67710	3.76179	4.88613	5.76944	5.57149	4.66141	4.58763
CA00g67720	85.9986	70.6045	95.5523	107.361	72.1767	71.167
CA00g67730	1.67191	1.87302	3.95433	2.75444	3.7592	1.99973
CA00g67740	21.0033	27.2809	29.7547	36.6216	24.8107	22.5852
CA00g67750	0	0	0	0	0	0.235263
CA00g67760	5.53819	3.09455	8.36244	6.63571	6.01472	6.23447
CA00g67770	0	0	0	0	0	0
CA00g67780	40.9617	43.7308	40.9695	34.681	36.2387	43.0531
CA00g67790	51.2021	51.1415	51.8601	49.3296	48.2682	50.4639
CA00g67800	14.7337	12.6225	12.8354	8.45114	13.2324	10.7045
CA00g67810	37.5134	30.5383	38.7006	39.8142	30.0736	26.4671
CA00g67820	71.5784	70.1974	80.1887	80.5049	81.1988	78.5778
CA00g67830	0	0	0	0	0	0
CA00g67840	9.82244	8.06211	10.3072	11.0804	7.21767	7.41078
CA00g67850	0	0	0	0	0	0
CA00g67860	0	0	0	0	0	0
CA00g67870	337.725	270.284	268.052	261.985	285.098	280.08
CA00g67880	0	0.244306	0.388951	0.375606	0.601472	0.235263
CA00g67890	0	0	0	0	0	0
CA00g67900	0	0	0	0	0	0
CA00g67910	0	0.0814355	0	0	0	0
CA00g67920	0	0	0	0	0	0
CA00g67930	1.04494	0.407177	0.194475	0.187803	0	0
CA00g67940	0	0	0	0	0	0
CA00g67950	0	0	0	0	0	0
CA00g67960	0	0	0	0	0	0
CA00g67970	0	0	0.12965	0	0.300736	0.117631
CA00g67980	0	0	0	0	0	0
CA00g67990	0	0	0	0	0	0
CA00g68000	0	0	0	0	0	0
CA00g68010	0	0	0	0	0	0
CA00g68020	0	0.162871	0.259301	0.375606	0	0
CA00g68030	2.82134	2.19876	4.79706	3.94386	1.20294	0.941051
CA00g68040	0.104494	0	0	0	0	0
CA00g68050	0	0.162871	0	0	0	0.352894
CA00g68060	7.62807	12.2153	10.6961	10.9552	7.66877	7.52841
CA00g68070	0	0.325742	0.12965	0	0	0
CA00g68080	0	0	0	0	0	0
CA00g68090	0	0	0	0	0	0
CA00g68100	0	0	0	0	0	0
CA00g68110	8.67301	8.06211	10.3072	9.26495	10.5258	8.93999
CA00g68120	0	0	0	0	0	0
CA00g68130	2.82134	0.89579	1.49098	2.50404	1.65405	1.76447
[truncated: 32,900 more rows]

## Sheet: N. benthamiana
geneid	MVM1	MVM2	LVM1	LVM2	TM1	TM2	FM1	FM2
NbC23129049g0001.1	0	0	0	0	0	0	0	0
NbC23135165g0001.1	0	0	0	0	0	0	0	0
NbC23135879g0001.1	0	0	0	0	0	0	0	0
NbC23136403g0001.1	0	0	0	0	0	0	0	0
NbC23139529g0001.1	0	0	0	0	0	0	0	0
NbC23143817g0001.1	0	0	0	0	0	0	0	0
NbC23148609g0001.1	0	0	0	0	0	0	0	0
NbC23151083g0001.1	0	0	0	0	0	0	0	0
NbC23151721g0001.1	0	0	0.108326	0.106587	0.065579	0	0	0.130995
NbC23153463g0001.1	0	0	0	0	0	0	0	0
NbC23154779g0001.1	0	0	0	0	0	0	0	0
NbC23156211g0001.1	0	0	0	0	0	0	0	0
NbC23156557g0001.1	0	0	0	0	0	0	0	0
NbC23164039g0001.1	0	0	0	0	0	0	0	0
NbC23171932g0001.1	29.3903	32.6334	33.6893	32.6157	29.3794	40.8319	39.2124	33.0107
NbC23174049g0001.1	0	0	0	0	0	0	0	0
NbC23174827g0001.1	0	0	0	0	0	0	0	0
NbC23180049g0001.1	0	0	0	0	0	0	0	0
NbC23182845g0001.1	0	0	0	0	0	0	0	0
NbC23186771g0001.1	1.19296	2.13805	0.433303	2.02516	1.96737	2.33325	1.10769	1.57194
NbC23187075g0001.1	0	0	0	0	0	0	0	0
NbC23187663g0001.1	0.433805	0.562645	0.324978	0.479643	0.262316	0.5185	0.147693	0.130995
NbC23200356g0001.1	14.8578	17.3295	8.99105	8.3671	22.4936	14.5828	11.52	9.30064
NbC23200834g0001.1	0	0	0	0	0	0	0	0
NbC23202838g0001.1	0	0	0	0	0	0	0	0
NbC23204368g0001.1	0	0	0	0	0	0	0	0
NbC23204936g0001.1	2.60283	2.36311	0.216652	1.59881	2.03295	0.842563	0.369231	1.44094
NbC23207800g0001.1	0	0	0	0	0	0	0	0
NbC23214512g0001.1	0	0	0	0	0	0	0	0
NbC23214544g0001.1	0	0	0	0	0	0	0	0
NbC23216976g0001.1	0	0	0	0	0	0	0	0
NbC23222793g0001.1	0	0	0	0	0	0	0	0
NbC23224681g0001.1	0	0	0	0	0	0.0648125	0	0
NbC23224697g0001.1	0	0	0	0	0	0	0	0
NbC23233801g0001.1	0	0	0	0	0	0	0	0
NbC23233809g0001.1	0	0	0	0	0	0	0	0
NbC23235419g0001.1	0.325354	0.337587	0.108326	0.319762	0.65579	0.453688	0.59077	0.392985
NbC23235833g0001.1	4.01269	3.82599	2.05819	2.45151	4.32821	5.37944	1.84616	4.32283
NbC23237767g0001.1	0	0	0	0	0	0	0	0
NbC23239095g0001.1	0.433805	0.225058	0.324978	0.266468	0.65579	0.25925	0.147693	0.130995
NbC23240422g0001.1	0	0	0	0	0	0	0	0
NbC23241500g0001.1	0	0	0	0	0	0	0	0
NbC23243904g0001.1	3.79579	4.16358	2.70815	4.37008	5.96769	5.24982	3.54462	5.37079
NbC23243906g0001.1	0	0	0	0	0	0	0	0
NbC23243940g0001.1	0	0	0	0	0	0	0	0
NbC23246574g0001.1	0	0	0	0	0	0	0	0
NbC23251274g0001.1	0	0	0	0	0	0	0	0
NbC23251784g0001.1	0	0	0	0	0	0	0	0
NbC23257040g0001.1	0	0	0	0	0	0	0	0
NbC23259490g0001.1	0	0	0	0	0	0	0	0
NbC23260500g0001.1	0	0	0	0	0	0	0	0
NbC23261838g0001.1	3.14508	1.80047	0.974933	1.38563	3.41011	3.111	1.18154	2.4889
NbC23264274g0001.1	0	0.112529	0.108326	0.0532936	0.459053	0.324063	0	0.130995
NbC23265194g0001.1	0	0	0	0	0	0	0	0
NbC23265540g0001.1	0	0	0	0	0	0	0	0
NbC23266469g0001.1	0	0	0	0	0	0	0	0
NbC23268017g0001.1	0	0	0	0	0	0	0	0
NbC23269830g0001.1	0	0	0	0	0	0	0	0
NbC23274774g0001.1	0	0	0	0	0	0	0	0
NbC23280598g0001.1	0	0	0	0	0	0	0	0
NbC23282174g0001.1	0.325354	0.225058	0.324978	0.319762	0.852527	0.5185	0.59077	0.392985
NbC23283790g0001.1	0	0	0	0	0	0	0	0
NbC23283848g0001.1	0	0	0	0	0	0	0	0
NbC23285584g0001.1	0	0	0	0	0	0	0	0
NbC23288952g0001.1	7.80849	7.31439	6.7162	12.2042	17.0505	8.94413	6.8677	7.20472
NbC23288956g0001.1	0	0	0	0	0	0	0	0
NbC23293213g0001.1	0	0	0	0	0	0	0	0
NbC23294013g0001.1	0	0	0	0	0	0	0	0
NbC23294119g0001.1	0	0	0	0	0	0	0	0
NbC23295987g0001.1	0	0	0	0	0	0	0	0
NbC23300057g0001.1	0	0	0	0	0	0	0	0
NbC23300597g0001.1	0	0	0	0.0532936	0	0	0	0
NbC23305057g0001.1	0	0	0	0	0	0	0	0
NbC23305221g0001.1	0	0	0	0	0	0	0	0
NbC23305291g0001.1	0.759158	0.900233	0.108326	0.213175	0.721369	0.583313	0.221539	0.26199
NbC23308033g0001.1	6.18172	5.4014	6.93285	8.3671	5.37748	7.45344	10.7077	9.69362
NbC23312891g0001.1	0	0	0	0	0	0	0	0
NbC23313091g0001.1	216.252	230.009	97.6016	167.928	139.749	232.936	123.693	270.242
NbC23313247g0001.1	0	0	0.108326	0	0.065579	0	0	0
NbC23315601g0001.1	0	0	0	0	0	0	0	0
NbC23321587g0001.1	0.325354	0.675174	1.94987	0.266468	1.44274	0.324063	1.18154	0.130995
NbC23322059g0001.1	0	0	0	0	0	0	0	0
NbC23325727g0001.1	0.542256	1.01276	0.108326	1.17246	1.50832	0.972188	0.221539	0.785969
NbC23327157g0001.1	0	0	0	0	0	0	0	0
NbC23327443g0001.1	0	0	0	0	0	0	0	0
NbC23328417g0001.1	0	0	0	0	0	0	0	0
NbC23330545g0001.1	0.86761	0.675174	0.216652	0.639524	0.983685	0.712938	0.443078	0.523979
NbC23334522g0001.1	0	0	0	0	0	0	0	0
NbC23334720g0001.1	0	0	0	0	0	0	0	0
NbC23341306g0001.1	9.43525	8.43968	3.57475	8.04734	9.0499	7.64788	2.36308	5.1088
NbC23342240g0001.1	0	0	0	0	0	0	0	0
NbC23346514g0001.1	0	0	0	0	0	0	0	0
NbC23346764g0001.1	0	0	0	0	0	0	0	0
NbC23347044g0001.1	0	0	0	0	0	0	0	0
NbC23351942g0001.1	0	0	0	0	0	0	0	0
NbC23352320g0001.1	12.6888	9.6775	8.01611	12.8971	30.8877	18.342	12.9231	15.0644
NbC23353710g0001.1	0.216902	0.562645	0.324978	0.58623	1.04926	0.388875	0.221539	0.130995
NbC23356263g0001.1	2.06057	1.35035	0.758281	2.13175	2.42642	1.16663	0.886155	2.22691
NbC23358473g0001.1	0	0	0	0	0	0	0	0
NbC23361447g0002.1	0.216902	0.450116	0.216652	0.159881	0.459053	0.129625	0	0.523979
NbC23362311g0001.1	0	0	0	0	0	0	0	0
NbC23364415g0001.1	0	0	0	0	0	0	0	0
NbC23369687g0001.1	0.976061	1.12529	0.541629	0.959286	1.83621	0.712938	0.59077	0.916964
NbC23373662g0001.1	5.74791	3.71346	3.46643	2.71798	6.75464	4.99057	5.24309	8.51467
NbC23374024g0001.1	0	0	0	0	0	0	0	0
NbC23375122g0001.1	0	0	0	0	0	0	0	0
NbC23380142g0001.1	0	0	0	0	0	0	0	0
NbC23383932g0001.1	0	0	0	0	0	0	0	0
NbC23387224g0001.1	0	0	0	0	0	0	0	0
NbC23387408g0001.1	3.03663	3.37587	1.40824	2.71798	2.88548	2.33325	1.92	2.88189
NbC23387512g0001.1	15.0747	12.4907	6.06625	15.6683	25.5102	21.1289	9.23079	17.9463
NbC23388304g0001.1	0.108451	0.112529	0.324978	0.213175	0.983685	0.25925	0.221539	0.26199
NbC23392052g0001.1	0	0.225058	0.541629	0.159881	0.262316	0.25925	0.369231	0.26199
NbC23393096g0001.1	0	0	0	0	0	0	0	0
NbC23393118g0001.1	0	0	0	0	0	0	0	0
NbC23400006g0001.1	1.40987	1.12529	0.974933	1.06587	1.50832	0.712938	0.295385	1.44094
NbC23406045g0001.1	0	0	0	0	0	0	0	0
NbC23407105g0001.1	3.25354	4.16358	0.758281	2.13175	1.90179	3.111	0.738463	3.92985
NbC23407255g0001.1	0.108451	0.112529	0	0.0532936	0.196737	0.194438	0	0
NbC23408311g0001.1	0	0	0	0	0	0	0	0
NbC23409183g0001.1	0	0	0	0	0	0	0	0
NbC23411015g0001.1	2.81973	2.81323	3.7914	2.66468	3.738	3.75913	2.65847	4.32283
NbC23412097g0001.1	1.73522	3.03829	1.19158	1.6521	2.42642	1.81475	1.99385	1.83393
NbC23414213g0001.1	0	0	0	0	0	0.0648125	0	0
NbC23415109g0001.1	0	0	0	0	0	0	0	0
NbC23416553g0001.1	0	0.112529	0.216652	0.0532936	0.131158	0.0648125	0	0
NbC23417273g0001.1	0	0	0	0	0	0	0	0
NbC23418051g0001.1	0	0	0	0	0	0	0	0
NbC23418517g0001.1	0	0	0	0	0	0	0	0
NbC23419769g0001.1	0	0	0	0	0	0	0	0
NbC23420229g0001.1	0	0	0	0	0	0	0	0
NbC23422795g0001.1	0	0.112529	0	0.0532936	0.131158	0	0.0738463	0
NbC23429524g0001.1	0	0	0	0	0	0	0	0
NbC23431304g0001.1	0	0	0	0	0	0	0	0
NbC23433001g0001.1	2.38593	2.58817	1.08326	1.22575	1.83621	1.16663	1.25539	1.57194
NbC23438069g0001.1	0	0	0	0	0	0	0	0
NbC23440593g0001.1	0	0	0	0	0	0	0	0
NbC23445168g0001.1	0	0	0	0	0	0	0	0
NbC23447716g0001.1	0.325354	0.450116	0	0.319762	0.393474	0.388875	0.0738463	0.130995
NbC23452727g0001.1	0	0	0	0	0	0	0	0
NbC23454639g0001.1	5.85636	4.05105	1.73321	1.49222	7.14811	3.95357	3.10154	7.7287
NbC23455111g0001.1	0	0	0	0	0	0	0	0
NbC23458119g0001.1	0.433805	0.225058	0	0.106587	0.262316	0.388875	0.221539	0.130995
NbC23459149g0002.1	6.61552	6.41416	2.16652	4.84972	6.82022	6.09238	2.88001	7.99069
NbC23461751g0001.1	0	0	0	0	0	0	0	0
NbC23463937g0001.1	0	0	0	0	0	0	0	0
NbC23464925g0001.1	0	0	0	0	0	0	0	0
NbC23467339g0001.1	0	0	0	0	0	0	0	0
NbC23469452g0001.1	0.976061	1.01276	1.40824	1.54552	1.77063	1.42588	1.25539	1.44094
NbC23469802g0001.1	0.433805	0.562645	0.324978	0.532936	0.918106	0.25925	0.147693	0.916964
NbC23469890g0001.1	0	0	0	0	0	0	0	0
NbC23471260g0001.1	1.40987	1.35035	0.541629	1.49222	2.55758	1.74994	0.664617	1.30995
NbC23471738g0001.1	0.108451	0.112529	0.108326	0.373055	0.327895	0	0	0.26199
NbC23472458g0002.1	0	0	0	0	0	0	0	0
NbC23473112g0001.1	2.38593	2.92576	0.541629	2.45151	3.41011	4.148	0.960002	1.57194
NbC23474090g0001.1	0	0	0	0	0	0	0	0
NbC23474810g0001.1	0	0	0	0	0	0	0	0
NbC23477418g0001.1	1.62677	1.35035	0.758281	1.11917	1.50832	0.972188	1.18154	0.916964
NbC23481810g0001.1	0.216902	0.112529	0	0.0532936	0.065579	0.0648125	0	0.130995
NbC23482046g0002.1	0	0	0	0	0	0	0	0
NbC23484458g0001.1	0	0	0	0	0	0	0	0
NbC23486472g0001.1	0	0	0	0	0	0	0	0
NbC23489043g0001.1	0	0	0	0	0	0	0	0
NbC23489215g0001.1	0	0	0	0	0	0	0	0
NbC23491245g0001.1	0	0	0	0	0	0	0	0
NbC23492897g0001.1	0	0	0	0	0	0	0	0
NbC23493851g0001.1	0	0	0	0	0	0	0	0
NbC23496037g0001.1	0	0	0	0	0	0.0648125	0	0
NbC23505093g0001.1	0	0	0	0	0	0	0	0
NbC23505861g0001.1	0	0	0	0	0	0	0	0
NbC23508835g0001.1	0	0	0	0	0	0	0	0
NbC23510395g0001.1	0	0	0	0	0	0	0	0
NbC23510543g0001.1	0	0	0	0	0	0	0	0
NbC23511491g0001.1	0	0	0	0	0	0	0	0
NbC23511915g0001.1	0	0	0	0	0	0	0	0
NbC23512151g0001.1	17.1353	15.6415	2.70815	18.2797	25.3791	22.5548	5.24309	21.6142
NbC23514059g0001.1	0	0	0	0	0	0	0	0
NbC23519462g0001.1	1.19296	0.450116	0.216652	0.852698	0.852527	0.583313	0.369231	1.83393
NbC23521239g0001.1	0	0	0	0	0	0	0	0
NbC23522457g0001.1	2.16902	3.15081	1.73321	2.07845	3.86916	2.98138	2.14154	5.1088
NbC23524041g0001.1	1.62677	1.35035	0.541629	1.06587	1.44274	1.10181	0.443078	0.523979
NbC23525749g0001.1	0	0	0	0	0	0	0	0
NbC23527433g0001.1	0	0	0	0	0	0	0	0
NbC23529093g0001.1	0	0	0	0	0.131158	0	0	0
NbC23530535g0001.1	0	0	0	0	0	0	0	0
NbC23530677g0001.1	0	0	0	0	0	0	0	0
NbC23531351g0001.1	1.30141	1.12529	0.649955	0.852698	6.29558	1.36106	1.47693	1.57194
NbC23532623g0001.1	0	0	0	0	0	0	0	0
NbC23533691g0001.1	6.83243	7.65198	5.52462	9.48627	16.2636	11.407	6.42463	14.2784
NbC23534481g0001.1	0	0	0	0	0	0	0	0
NbC23534727g0001.1	1.84367	1.91299	1.08326	1.22575	3.14779	1.81475	1.62462	2.6199
NbC23535595g0001.1	0.759158	0.225058	0	0.426349	0.590211	0.777751	0.147693	0.26199
NbC23536830g0001.1	1.51832	1.91299	0.866607	2.29163	4.13148	2.13881	1.18154	2.22691
NbC23538168g0001.1	0	0	0	0	0	0	0	0
NbC23540242g0001.1	0	0	0	0	0	0	0	0
NbC23541614g0001.1	0	0	0	0	0	0	0	0
NbC23542804g0001.1	0	0	0	0	0	0	0	0
NbC23543402g0001.1	0	0	0	0	0	0	0	0
NbC23545506g0001.1	3.68734	3.37587	1.73321	3.3575	2.16411	2.39806	2.36308	3.66786
NbC23545902g0002.1	0	0	0	0	0	0	0	0
NbC23546812g0001.1	0	0	0	0	0	0	0	0
NbC23547360g0001.1	0	0	0	0	0	0	0	0
NbC23550584g0001.1	0	0	0	0	0	0	0	0
NbC23550876g0001.1	0	0	0	0	0	0	0	0
NbC23550878g0001.1	7.04933	7.31439	5.74127	8.10063	6.68906	6.87013	4.20924	5.89477
NbC23552614g0001.1	0	0	0	0	0	0	0	0
NbC23557926g0001.1	0.976061	1.12529	2.9248	1.49222	1.96737	1.87956	1.92	1.83393
NbC23558792g0001.1	2.38593	1.23782	2.05819	1.91857	2.03295	2.85175	1.18154	0.785969
NbC23559974g0001.1	0	0	0	0	0	0	0	0
NbC23560316g0001.1	0	0	0	0	0	0	0	0
NbC23562928g0001.1	0	0	0	0	0	0	0	0
NbC23567427g0001.1	0	0	0.324978	0.266468	0.131158	0.129625	0.221539	0.392985
NbC23567659g0001.1	0	0	0	0	0	0	0	0
NbC23570160g0001.1	0	0	0	0	0	0	0	0
NbC23574168g0001.1	0	0	0	0	0	0	0	0
NbC23574182g0001.1	0.542256	0.112529	0.433303	0.58623	0.786948	0.453688	0.738463	0.26199
NbC23574698g0001.1	0	0	0	0	0	0	0	0
NbC23574986g0001.1	5.20566	4.38863	4.98299	4.58325	7.8039	6.67569	3.84001	4.19184
NbC23578112g0001.1	0	0	0	0	0	0	0	0
NbC23579900g0002.1	14.6409	25.094	10.291	15.4019	2.42642	13.8051	3.24924	2.6199
NbC23581370g0001.1	0	0	0	0	0.065579	0	0	0
NbC23582732g0001.1	0	0	0	0	0.196737	0.0648125	0	0
NbC23584522g0001.1	0	0	0	0	0	0	0	0
NbC23586865g0001.1	0	0	0	0	0	0	0	0
NbC23587153g0001.1	0	0	0	0	0	0	0	0
NbC23587611g0001.1	0.542256	0.450116	0.324978	0.426349	0.524632	0.0648125	0.59077	0.523979
NbC23588111g0001.1	0	0	0	0	0	0	0	0
NbC23589579g0001.1	0	0	0	0	0	0	0	0
NbC23590977g0001.1	0.976061	0.900233	0.433303	1.06587	0.852527	0.25925	1.32923	0.523979
NbC23592397g0001.1	0.542256	0.675174	0.108326	1.17246	1.83621	0.583313	0.516924	0.654974
NbC23597075g0001.1	0	0	0	0	0	0.0648125	0	0
NbC23600465g0001.1	0.325354	0.787704	0.758281	0.58623	0.983685	0.648125	0.59077	0.523979
NbC23601447g0001.1	0	0	0	0	0	0	0	0
NbC23601511g0001.1	0	0	0	0	0	0	0	0
NbC23602799g0001.1	0	0	0	0	0	0	0	0
NbC23608205g0001.1	0	0	0	0	0	0	0	0
NbC23609153g0001.1	0	0	0	0	0	0	0	0
NbC23609911g0002.1	0	0	0	0	0	0	0	0
NbC23611127g0001.1	0	0	0	0	0	0	0	0
NbC23614995g0001.1	0	0	0	0	0	0	0	0
NbC23615037g0001.1	2.27748	0.562645	0.541629	1.01258	3.47569	1.5555	0.960002	2.22691
NbC23616243g0001.1	0	0	0	0	0	0	0	0
NbC23616463g0001.1	0.325354	0.787704	0.324978	0.479643	0.721369	0.5185	0.369231	0.654974
NbC23619549g0002.1	0	0	0	0	0	0	0	0
NbC23626683g0001.1	0	0	0	0	0	0	0	0
NbC23626727g0001.1	0	0	0	0	0	0	0	0
NbC23627629g0001.1	0.433805	0.450116	0.866607	1.17246	0.721369	0.648125	0.738463	0.916964
NbC23631737g0001.1	0	0	0	0	0	0	0	0
NbC23636173g0001.1	0.108451	0.112529	0	0.213175	0.065579	0.25925	0.295385	0.130995
NbC23638007g0001.1	0.108451	0	0	0.0532936	0	0	0	0
NbC23638277g0001.1	1.95212	1.23782	2.70815	2.29163	2.09853	2.20363	1.77231	2.09592
NbC23641021g0001.1	0	0	0	0	0	0	0	0
NbC23641713g0001.1	1.51832	1.57541	1.19158	2.13175	1.77063	1.62031	1.03385	2.35791
NbC23642249g0001.1	0	0	0	0	0	0	0	0
NbC23647566g0001.1	1.62677	1.35035	0.541629	1.17246	2.16411	1.037	0.664617	0.654974
NbC23648761g0001.1	0	0	0	0	0	0	0	0
NbC23649023g0001.1	0	0	0	0	0	0	0	0
NbC23649577g0001.1	1.08451	0.450116	0.108326	0.373055	0.393474	0.324063	0.221539	0.654974
NbC23649819g0001.1	0	0	0	0	0	0	0	0
NbC23651759g0001.1	0	0	0	0	0	0	0	0
NbC23653829g0001.1	0	0	0	0	0.065579	0	0	0
NbC23654049g0001.1	0.542256	0.337587	0.216652	0.532936	0.459053	0.453688	0.221539	0.26199
NbC23654771g0001.1	0	0	0	0	0	0	0	0
NbC23654983g0001.1	0	0	0	0	0	0	0	0
NbC23656513g0001.1	0	0	0	0	0	0	0	0
NbC23659329g0001.1	0	0	0	0	0	0	0	0
NbC23659389g0001.1	0.650707	1.35035	0.216652	1.22575	0.786948	0.5185	0.0738463	1.04796
NbC23660990g0001.1	0.108451	0.225058	0.108326	0.159881	0.327895	0.25925	0	0.130995
NbC23661000g0001.1	0	0	0	0	0	0	0	0
NbC23661338g0001.1	0	0	0	0	0	0.0648125	0	0
NbC23662598g0001.1	4.2296	3.82599	7.25783	4.1569	3.738	4.27763	6.49847	4.58482
NbC23662714g0001.1	0.650707	0.450116	0.541629	0.905992	1.37716	0.842563	0.886155	0.654974
NbC23663066g0001.1	1.73522	1.57541	0.649955	1.11917	2.16411	2.00919	1.40308	2.35791
NbC23664894g0001.1	1.51832	1.68794	0.216652	0.959286	1.70505	1.10181	1.03385	1.17895
NbC23666742g0001.1	0	0	0	0	0	0	0	0
NbC23671296g0002.1	1.08451	0.675174	0.108326	0.426349	0.918106	0.25925	0.221539	0.523979
NbC23674094g0001.1	5.09721	8.32715	4.54969	5.54254	9.18106	10.2404	5.24309	9.43163
NbC23674686g0001.1	0	0	0	0	0	0	0	0
NbC23674820g0001.1	0	0	0	0	0	0	0	0
NbC23675126g0001.1	0	0	0	0	0	0	0	0
NbC23679489g0001.1	0.108451	0	0	0.106587	0.065579	0.0648125	0.295385	0
NbC23679731g0001.1	0	0	0	0	0	0	0	0
NbC23681997g0001.1	0	0	0	0	0	0	0	0
NbC23683697g0001.1	3.47044	3.71346	2.27484	3.51738	1.77063	2.98138	2.95385	3.40587
NbC23683785g0001.1	0	0	0	0	0	0	0	0
NbC23683855g0001.1	0	0	0	0	0	0	0	0
NbC23683935g0002.1	2.16902	1.12529	1.19158	0.799405	3.21337	1.42588	1.10769	1.57194
NbC23684155g0001.1	1.40987	0.900233	0.541629	1.22575	3.01663	1.49069	1.03385	0.785969
NbC23689612g0001.1	0	0	0	0	0	0	0	0
NbC23691240g0001.1	0.108451	0	0	0	0	0	0	0
NbC23694632g0001.1	0	0	0.324978	0.319762	0.196737	0.129625	0.221539	0.392985
NbC23697068g0001.1	0.759158	0.787704	0.541629	0.746111	2.62316	1.10181	1.03385	2.75089
NbC23698138g0001.1	0	0	0	0	0	0	0	0
NbC23699290g0001.1	0	0	0	0	0	0	0	0
NbC23700237g0001.1	0	0	0	0	0	0	0	0
NbC23701425g0001.1	0	0	0	0	0	0	0	0
NbC23704004g0001.1	0	0	0	0	0	0	0	0
NbC23705708g0001.1	0	0	0	0	0	0	0	0
NbC23709070g0001.1	33.403	28.6949	11.1576	33.4684	39.2818	43.1652	21.12	37.4645
NbC23709198g0001.1	0	0	0	0	0	0	0	0
NbC23710160g0001.1	0	0	0	0	0	0	0	0
NbC23714042g0001.1	0	0	0	0	0	0	0	0
NbC23714312g0001.1	3.57889	2.58817	3.68308	2.66468	2.22969	2.52769	6.12924	2.6199
NbC23714878g0001.1	0	0	0	0	0	0	0	0
NbC23718152g0001.1	0	0	0	0	0	0	0	0
NbC23720052g0001.1	0	0	0	0	0	0	0	0
NbC23721530g0001.1	0	0	0	0	0	0	0	0
NbC23724496g0001.1	0	0	0	0	0	0	0	0
NbC23725186g0001.1	0.433805	0.562645	0	0.213175	0.459053	0.25925	0	0.26199
NbC23726790g0001.1	0	0	0	0	0	0	0	0
NbC23727185g0001.1	0	0	0	0	0	0	0	0
NbC23727221g0001.1	0	0	0	0	0	0	0	0
NbC23728603g0001.1	0	0	0	0	0	0	0	0
NbC23729813g0001.1	0	0	0	0	0	0	0	0
NbC23730213g0001.1	22.0156	19.4675	12.5658	19.239	17.5752	23.851	16.6893	26.461
NbC23731719g0001.1	0	0	0	0	0	0	0	0
NbC23732021g0002.1	0	0	0	0	0	0	0	0
NbC23737139g0001.1	10.5198	7.65198	5.74127	10.2857	20.0016	12.8977	6.94155	13.4925
NbC23737687g0001.1	1.84367	2.02552	4.22471	3.41079	0.786948	2.39806	5.68616	1.04796
NbC23737757g0001.1	0	0	0	0	0	0	0	0
NbC23738215g0001.1	0	0	0	0	0	0	0	0
NbC23739273g0001.1	0	0	0	0	0	0	0	0
NbC23743081g0001.1	0	0	0	0	0	0	0	0
NbC23744093g0001.1	0	0	0	0	0	0	0	0
NbC23744801g0001.1	0	0	0	0	0	0	0	0
NbC23747271g0001.1	0	0	0	0	0	0	0	0
NbC23747605g0001.1	66.9144	60.9908	11.4825	56.1182	68.2022	68.7013	21.7108	83.7057
NbC23748503g0001.1	0	0	0	0	0	0	0	0
NbC23749203g0001.1	0	0	0	0	0	0	0	0
NbC23749211g0001.1	0	0	0	0	0	0	0	0
NbC23749293g0001.1	0	0	0	0	0	0	0	0
NbC23749343g0001.1	0	0	0	0	0	0	0	0
NbC23749903g0001.1	0	0	0	0	0	0	0	0
NbC23750043g0001.1	0	0	0	0	0	0	0	0
NbC23752341g0002.1	2.16902	0.675174	0.216652	1.43893	3.01663	1.36106	0.664617	2.75089
NbC23755045g0001.1	0	0	0	0	0	0	0	0
NbC23755371g0001.1	0.650707	0.112529	0.108326	0.426349	0.786948	0.194438	0.59077	0.523979
NbC23755733g0001.1	0	0	0	0	0	0	0	0
NbC23755853g0001.1	0	0	0	0	0	0	0	0
NbC23756437g0001.1	0	0	0	0	0	0	0	0
NbC23758669g0001.1	0	0	0	0.0532936	0	0	0.0738463	0
NbC23760399g0001.1	5.53101	4.16358	2.38317	4.2102	5.11516	5.50907	1.84616	2.6199
NbC23761219g0001.1	0	0	0	0	0	0	0	0
NbC23761605g0001.1	0.86761	0.787704	0.324978	0.639524	1.63948	1.23144	0.886155	0.392985
NbC23762525g0001.1	0	0	0	0	0	0	0	0
NbC23763655g0001.1	0	0	0	0	0	0	0	0
NbC23763781g0001.1	0	0	0	0	0	0	0	0
NbC23764053g0001.1	137.408	130.421	54.0546	95.822	145.651	130.208	74.5848	185.882
NbC23764273g0001.1	1.51832	1.01276	0.758281	1.01258	1.04926	1.29625	0.812309	0.916964
NbC23764863g0001.1	1.73522	1.68794	1.19158	2.23833	2.492	2.00919	1.69846	2.35791
NbC23765889g0001.1	0	0	0	0	0	0	0	0
NbC23766265g0001.1	1.51832	0.787704	0.649955	0.852698	0.65579	0.712938	0.221539	1.04796
NbC23766469g0001.1	0	0	0	0	0	0	0	0
NbC23767124g0001.1	0.433805	0.112529	0.433303	0.106587	0.327895	0.129625	0.147693	0.130995
NbC23767514g0001.1	0	0	0	0	0	0	0	0
NbC23767886g0001.1	0.108451	0	0.324978	0.0532936	0	0.194438	0.0738463	0.392985
NbC23769986g0001.1	0	0	0	0	0	0	0	0
NbC23770994g0002.1	1.08451	1.23782	0.974933	1.33234	1.90179	1.23144	0.886155	1.96492
NbC23774738g0001.1	0.433805	0.675174	0	0.692817	0.524632	0.194438	0.443078	0.130995
NbC23776494g0001.1	0	0	0	0	0	0	0	0
NbC23778225g0001.1	0	0	0	0	0	0	0	0
NbC23778713g0001.1	2.60283	2.47564	2.16652	3.62397	2.16411	2.65731	1.62462	2.35791
NbC23780968g0001.1	0	0	0	0	0	0	0	0
NbC23784641g0001.1	7.26623	6.63922	3.3581	6.44853	5.3119	4.73132	2.43693	3.01288
NbC23785213g0002.1	0	0	0	0	0	0	0	0
NbC23785289g0001.1	0	0	0	0	0	0	0	0
NbC23785971g0001.1	0	0	0	0	0	0	0	0
NbC23786187g0001.1	3.14508	3.93852	0.649955	2.23833	2.88548	2.39806	0.960002	4.71582
NbC23788121g0001.1	0	0.337587	0.216652	0.106587	0.65579	0.453688	0.221539	0
NbC23790037g0002.1	0	0	0	0	0	0	0	0
NbC23791073g0001.1	0	0	0	0	0	0.129625	0	0
NbC23793351g0001.1	0	0	0	0	0	0	0	0
NbC23793413g0001.1	0	0	0	0	0	0	0	0
NbC23793509g0001.1	0	0	0	0	0	0	0	0
NbC23793619g0001.1	0	0	0	0	0	0	0	0
NbC23794743g0001.1	0	0	0	0	0	0	0	0
NbC23794875g0001.1	0	0	0	0	0	0	0	0
NbC23794879g0001.1	0.542256	0.450116	0.541629	1.01258	1.18042	0.648125	0.443078	1.30995
NbC23795695g0001.1	0	0.112529	0	0	0.065579	0	0.295385	0
NbC23797745g0001.1	0.108451	0.562645	0.324978	0.159881	0.852527	0.324063	0.147693	0.392985
NbC23797905g0001.1	0	0	0	0	0	0	0	0
NbC23799319g0001.1	1.95212	1.46288	2.9248	3.25091	2.16411	2.72213	2.14154	2.75089
NbC23802725g0001.1	0	0	0	0	0	0	0	0
NbC23803083g0001.1	5.31411	2.92576	2.38317	4.2102	6.62348	4.60169	3.9877	5.37079
NbC23803361g0002.1	0	0	0	0	0	0	0	0
NbC23809551g0001.1	0	0	0	0.106587	0.065579	0.0648125	0.147693	0
NbC23809683g0001.1	0	0	0	0	0	0	0	0
NbC23812137g0001.1	1.84367	1.46288	1.51656	1.97186	2.03295	2.26844	0.516924	0.654974
NbC23813943g0001.1	1.51832	2.13805	2.70815	2.23833	3.54127	1.87956	2.0677	1.96492
NbC23814183g0001.1	0	0	0	0	0	0	0	0
NbC23814295g0001.1	0	0	0	0	0	0	0	0
NbC23814427g0001.1	0	0	0	0	0	0	0	0
NbC23821162g0001.1	0	0	0	0	0	0	0	0
NbC23821798g0001.1	15.0747	18.2297	8.77439	13.9629	12.9191	14.2588	5.39078	7.7287
NbC23823928g0001.1	0	0	0	0	0	0	0	0
NbC23824403g0002.1	0	0	0	0	0	0	0	0
NbC23824649g0001.1	0	0.112529	0.216652	0.106587	0.327895	0.453688	0.0738463	0.130995
NbC23828907g0001.1	0	0	0	0	0	0	0	0
NbC23829173g0001.1	0	0	0	0	0	0	0	0
NbC23830153g0002.1	0	0.225058	0.108326	0.0532936	0.131158	0.0648125	0	0
NbC23830543g0001.1	0	0	0	0	0	0	0	0
NbC23832679g0001.1	1.95212	2.25058	1.19158	1.59881	1.83621	1.037	0.59077	1.44094
NbC23833409g0001.1	0	0	0	0	0	0	0	0
NbC23835500g0001.1	0	0	0	0	0	0	0	0
NbC23837422g0001.1	0	0	0	0	0	0	0	0
NbC23837758g0001.1	1.73522	1.01276	0.433303	1.38563	1.83621	1.10181	0.221539	1.17895
NbC23838148g0001.1	0	0	0	0	0	0	0	0
NbC23839216g0001.1	0.325354	1.01276	0.324978	0.319762	0.918106	0.5185	0.0738463	0.785969
NbC23841612g0001.1	0	0	0	0	0	0	0	0
NbC23842620g0001.1	1.95212	2.13805	1.08326	0.959286	0.852527	1.29625	0.59077	1.44094
NbC23843582g0002.1	9.76061	10.3527	4.00806	7.62099	7.21369	10.6941	4.9477	13.0995
NbC23843986g0001.1	0	0	0	0	0	0	0	0
NbC23847028g0001.1	2.71128	2.36311	2.05819	2.45151	2.68874	2.33325	2.28923	3.40587
NbC23849516g0001.1	1.19296	1.57541	0.758281	0.639524	1.18042	0.583313	0.516924	0.916964
NbC23849928g0001.1	5.42256	6.07657	2.16652	4.05032	3.67242	4.47207	1.47693	6.02576
NbC23850340g0001.1	2.27748	2.02552	1.29991	2.13175	1.31158	1.62031	1.18154	1.17895
NbC23850450g0002.1	4.8803	4.50116	4.22471	6.55512	7.01695	4.86094	6.49847	6.02576
NbC23850577g0001.1	0	0	0	0	0	0	0	0
NbC23850965g0001.1	0	0	0	0	0	0	0	0
NbC23854757g0001.1	1.19296	0.562645	0.866607	0.746111	1.31158	0.907376	0.960002	1.44094
NbC23855827g0002.1	0.976061	1.01276	1.19158	0.959286	0.852527	0.388875	1.03385	0.916964
NbC23855917g0001.1	0	0	0	0	0	0	0	0
NbC23856411g0001.1	0	0	0	0	0	0	0	0
NbC23856951g0001.1	0	0	0	0	0	0	0	0
NbC23859219g0001.1	0	0	0	0	0	0	0	0
NbC23860750g0001.1	0	0	0	0	0	0	0	0
NbC23864313g0001.1	5.96482	6.52669	1.73321	5.43595	6.95137	5.96275	2.65847	9.43163
NbC23865055g0001.1	0	0	0	0	0	0	0	0
NbC23868163g0001.1	0	0	0	0	0	0	0	0
NbC23868309g0001.1	0	0	0	0	0	0	0	0
NbC23868495g0001.1	0	0	0	0	0	0	0	0
NbC23870409g0001.1	6.39862	4.72622	3.89973	6.34194	10.6238	7.12938	4.65232	6.54974
NbC23871675g0001.1	0.759158	0.112529	0.758281	0.58623	0.721369	0.583313	0.443078	0.785969
NbC23871945g0001.1	0.759158	0.787704	0.216652	0.159881	0.459053	0.194438	0.221539	0.785969
NbC23876461g0001.1	0	0	0	0	0	0	0	0
NbC23877651g0001.1	0	0	0	0	0	0	0	0
NbC23877853g0001.1	0	0	0	0	0	0	0.147693	0
NbC23879079g0001.1	1.84367	2.36311	1.19158	2.23833	1.77063	1.29625	0.960002	1.30995
NbC23882543g0001.1	0	0.337587	0	0.159881	0.262316	0.129625	0.295385	0
NbC23882545g0001.1	0	0	0	0	0	0	0	0
NbC23883165g0001.1	0.759158	1.01276	0.974933	0.905992	1.04926	1.23144	0.960002	1.17895
NbC23884425g0001.1	0	0	0	0	0	0	0	0
NbC23886207g0001.1	0	0	0	0	0	0	0	0
NbC23886557g0001.1	0	0	0	0	0	0	0	0
NbC23889011g0002.1	0.216902	0	0	0	0.131158	0	0	0
NbC23890850g0001.1	0.86761	0.450116	0.649955	1.06587	0.918106	0.5185	1.10769	0.523979
NbC23891506g0001.1	0	0	0	0	0	0	0	0.130995
NbC23894786g0001.1	0.108451	0.450116	0.216652	0.213175	0.262316	0.0648125	0.221539	0.130995
NbC23895968g0001.1	0	0	0	0	0	0	0	0
NbC23897726g0001.1	0	0.337587	0.108326	0	0.065579	0.129625	0	0
NbC23899306g0001.1	0	0	0	0	0	0	0	0
NbC23900014g0001.1	1.08451	1.80047	0.866607	1.86528	5.11516	3.69432	2.28923	3.27487
NbC23900056g0001.1	0	0	0	0	0	0	0	0
NbC23901172g0001.1	0	0	0	0	0	0	0	0
NbC23903334g0001.1	0	0	0	0	0	0	0	0
NbC23903998g0001.1	18.4367	15.529	11.3742	9.53956	12.3944	12.9625	11.52	14.0165
NbC23905900g0001.1	6.29017	5.73898	5.95792	6.98147	7.8039	6.54607	6.8677	4.19184
NbC23906848g0001.1	0	0	0	0	0	0	0	0
NbC23907220g0001.1	1.95212	2.25058	2.16652	2.39821	4.0659	2.39806	1.62462	2.35791
NbC23908242g0001.1	1.95212	3.03829	3.24978	2.98444	3.86916	2.5925	3.69231	2.22691
NbC23908292g0001.1	0.542256	0.675174	0.108326	1.17246	0.918106	0.5185	0.443078	0.785969
NbC23909974g0001.1	0	0	0	0	0	0	0	0
NbC23910120g0001.1	0	0	0	0	0	0	0	0
NbC23911994g0001.1	0	0	0	0	0	0	0	0
NbC23912298g0001.1	0	0	0	0	0	0	0	0
NbC23915109g0001.1	0	0	0	0	0	0	0	0
NbC23915509g0001.1	0	0	0	0	0	0	0	0
NbC23917119g0001.1	0	0	0	0	0	0	0	0
NbC23917607g0001.1	0	0	0	0	0	0	0	0
NbC23920609g0001.1	0	0	0	0	0	0	0	0
NbC23921619g0001.1	2.38593	2.13805	2.49149	2.34492	2.16411	3.82394	2.14154	3.40587
NbC23921923g0001.1	5.42256	5.96404	4.87466	6.28865	7.08253	6.87013	4.28308	7.20472
NbC23922323g0001.1	0.433805	0.562645	0.108326	0.692817	0.459053	0.324063	0.59077	0.523979
NbC23923731g0001.1	0	0	0	0	0	0	0	0
NbC23927159g0001.1	0	0	0	0	0	0	0	0
NbC23927999g0001.1	0.433805	0.112529	0	0.373055	0.262316	0.453688	0.738463	0.654974
NbC23929283g0001.1	0	0	0	0	0	0	0	0
NbC23929411g0001.1	0	0.112529	0.108326	0.266468	0.065579	0.0648125	0	0.26199
NbC23929911g0001.1	0	0	0	0	0	0	0	0
NbC23930535g0001.1	0	0	0	0	0.131158	0	0	0
NbC23933293g0001.1	0	0	0	0	0	0	0	0
NbC23933797g0001.1	0	0	0	0	0	0	0	0
NbC23934931g0001.1	0	0	0	0	0	0	0	0
NbC23936917g0001.1	0	0	0	0	0	0	0	0
NbC23939653g0001.1	0	0	0	0	0	0	0	0
NbC23939997g0001.1	0	0	0	0	0	0	0	0
NbC23940629g0001.1	0	0	0	0	0	0	0	0
NbC23940831g0001.1	1.73522	1.80047	2.27484	2.29163	2.62316	1.23144	1.77231	1.44094
NbC23941503g0001.1	0	0	0	0	0	0	0	0
NbC23943380g0001.1	0	0	0	0	0	0	0	0
NbC23945826g0002.1	0.650707	0.787704	0.216652	0.799405	1.04926	0.842563	0.221539	0.392985
NbC23946648g0001.1	1.51832	1.12529	2.05819	1.81198	1.96737	1.49069	1.62462	1.70293
NbC23947432g0001.1	0	0	0	0	0	0	0	0
NbC23949166g0001.1	0	0	0	0	0	0	0	0
NbC23951406g0001.1	6.07327	7.76451	3.46643	4.47667	3.67242	4.34244	2.88001	2.09592
NbC23951420g0001.1	0	0	0	0	0	0	0	0
NbC23954930g0001.1	0	0	0	0	0	0	0	0
NbC23955046g0001.1	0	0	0	0	0	0	0	0
NbC23960614g0001.1	2.16902	2.02552	0.974933	1.49222	2.03295	1.62031	1.03385	1.57194
NbC23963283g0001.1	0	0	0	0	0	0	0	0
NbC23963647g0001.1	0	0	0	0	0	0	0	0
NbC23965981g0001.1	0	0	0	0	0	0	0	0
NbC23966915g0001.1	0	0	0	0	0	0	0	0
NbC23967305g0001.1	0	0	0	0	0	0	0	0
NbC23968129g0001.1	0	0	0	0	0	0	0	0
NbC23968947g0001.1	0	0	0	0	0	0	0	0
NbC23969391g0001.1	0	0	0	0	0	0	0	0
NbC23972253g0001.1	0	0	0	0	0	0	0	0
NbC23972445g0001.1	0	0	0	0	0.065579	0.0648125	0	0
NbC23973679g0001.1	5.63946	3.82599	2.81647	2.82456	8.1318	3.17581	2.28923	4.84681
NbC23974699g0001.1	1.08451	0.900233	1.08326	1.01258	0.786948	0.777751	0.516924	0.916964
NbC23974981g0001.1	4.55495	4.05105	6.2829	4.58325	5.70537	3.69432	3.0277	2.75089
NbC23975337g0001.1	0.325354	0.675174	0.324978	0.692817	0.983685	0.907376	0.738463	0.392985
NbC23975443g0001.1	0	0.112529	0.108326	0.106587	0	0.0648125	0	0
NbC23977387g0001.1	0	0	0	0	0	0	0	0
NbC23978515g0001.1	0	0	0	0	0	0	0	0
NbC23979353g0001.1	6.18172	4.95128	3.14145	5.70242	4.65611	4.40725	3.17539	4.45383
NbC23979561g0001.1	0	0	0	0	0	0	0.0738463	0
NbC23979665g0001.1	0	0	0	0	0	0	0	0
NbC23982093g0001.1	0.216902	0	0	0.159881	0.262316	0.129625	0	0.130995
NbC23982713g0001.1	0	0	0	0	0	0	0	0
NbC23984723g0001.1	0	0	0	0	0	0	0	0
NbC23985755g0001.1	0.433805	0.225058	0.108326	0.266468	0.459053	0.25925	0.221539	0.130995
NbC23986161g0001.1	0	0	0	0	0	0	0	0
NbC23986411g0001.1	0	0	0	0	0	0	0	0
NbC23986537g0001.1	3.36199	3.93852	2.05819	2.34492	3.47569	3.69432	1.77231	3.27487
NbC23987923g0001.1	2.71128	3.26334	2.59982	2.18504	2.03295	2.074	1.10769	1.70293
NbC23988691g0001.1	27.0043	29.145	11.9158	28.8319	25.5758	29.9434	14.2523	28.8189
NbC23989517g0002.1	0	0	0	0	0	0	0	0
NbC23990197g0001.1	4.55495	3.60093	5.09131	3.3575	3.41011	4.27763	4.28308	4.19184
NbC23990513g0001.1	0	0	0	0	0	0	0	0
NbC23990909g0001.1	3.36199	2.25058	0.866607	1.91857	1.77063	1.49069	0.369231	1.04796
NbC23991205g0001.1	2.60283	2.58817	1.62489	2.66468	3.60685	2.39806	1.92	3.01288
NbC23991925g0001.1	0	0	0	0	0	0	0	0
NbC23992343g0001.1	42.8382	42.1984	17.8738	38.7978	57.0537	42.3226	28.6524	60.1266
NbC23994419g0001.1	0	0	0	0	0	0	0	0
NbC23996399g0001.1	0.433805	0.337587	0.324978	0.213175	0.393474	0.129625	0.295385	0.130995
NbC23998229g0001.1	0	0	0	0	0	0	0	0
NbC24000975g0001.1	0	0	0	0	0.065579	0	0	0
NbC24001453g0001.1	0	0	0	0	0	0	0	0
NbC24003935g0001.1	0	0	0	0	0	0	0	0
NbC24004441g0002.1	0.216902	0.112529	0	0.213175	0.131158	0.129625	0	0.130995
NbC24006085g0001.1	0	0	0	0	0	0	0	0
NbC24007533g0001.1	1.51832	0.337587	0.433303	1.27905	0.524632	0.453688	1.10769	1.57194
NbC24010665g0001.1	0	0	0	0	0	0	0	0
NbC24013865g0001.1	1.73522	1.12529	0.541629	1.01258	1.37716	1.29625	0.443078	2.6199
NbC24014415g0001.1	1.40987	0.337587	0.649955	1.17246	1.96737	1.62031	0.59077	1.04796
NbC24014927g0001.1	0	0	0	0	0	0	0	0
NbC24015739g0001.1	1.51832	1.35035	1.40824	1.33234	2.22969	1.23144	1.18154	1.70293
NbC24016945g0001.1	0	0	0	0	0	0	0	0
NbC24016995g0001.1	0	0	0	0	0	0	0	0
NbC24017063g0002.1	0	0	0	0	0	0	0	0
NbC24020227g0001.1	0	0	0	0	0	0	0	0
NbC24020691g0001.1	4.98876	3.15081	0.974933	2.55809	3.41011	4.34244	1.92	6.41875
NbC24021449g0001.1	4.12115	4.83875	1.40824	3.09103	5.57422	4.6665	2.21539	5.63278
NbC24022059g0001.1	0.108451	0.337587	0.108326	0.319762	0.262316	0.453688	0	0.392985
NbC24022377g0001.1	0	0	0	0	0	0	0	0
NbC24023801g0001.1	0	0	0	0	0	0	0	0
NbC24026083g0001.1	0	0	0	0.0532936	0	0.0648125	0	0
NbC24030342g0001.1	1.30141	3.60093	0.541629	2.29163	2.36084	1.94438	1.32923	2.09592
NbC24030932g0001.1	0	0	0	0	0	0	0	0
NbC24031148g0001.1	0	0	0	0	0	0	0	0
NbC24031742g0001.1	0	0	0.108326	0	0	0	0	0
NbC24034406g0001.1	0	0	0	0	0	0	0	0
NbC24037598g0001.1	0	0	0	0	0	0	0	0
NbC24038656g0001.1	0	0	0	0	0	0	0	0
NbC24041694g0001.1	0	0.112529	0	0	0.065579	0	0	0
NbC24042712g0001.1	2.27748	1.91299	1.08326	2.39821	2.55758	2.00919	1.62462	1.83393
NbC24042736g0001.1	0	0	0	0	0	0	0	0
NbC24043038g0001.1	8.78455	7.20186	6.06625	9.05992	13.3781	9.85151	9.82156	9.56263
NbC24044300g0001.1	0.325354	0.562645	0.433303	0.373055	0.786948	0.388875	0.59077	0.392985
NbC24045602g0001.1	0	0	0	0	0	0	0	0
NbC24046866g0001.1	0	0	0	0	0	0	0	0
NbC24049480g0001.1	1.30141	0.900233	0.649955	1.01258	1.31158	1.5555	0.516924	0.392985
NbC24051134g0001.1	0	0	0	0	0	0	0.0738463	0
NbC24052114g0001.1	0	0	0	0	0	0	0	0
NbC24055048g0001.1	0	0	0	0	0	0	0	0
NbC24056338g0001.1	0.433805	0.675174	0.108326	0.58623	0.786948	0.5185	0.147693	0.26199
NbC24056408g0001.1	0	0	0	0	0	0	0	0
NbC24056934g0001.1	5.96482	6.30163	3.03312	5.38266	7.93506	7.90713	3.39693	7.5977
NbC24057186g0001.1	8.24229	8.32715	16.6822	9.48627	10.8205	8.49044	15.36	7.5977
NbC24057400g0002.1	1.62677	1.80047	1.73321	2.61139	2.16411	2.20363	1.69846	2.22691
NbC24059153g0001.1	5.20566	4.95128	3.3581	4.63655	4.32821	3.111	2.80616	2.35791
NbC24059207g0001.1	0	0	0	0	0	0	0	0
NbC24060511g0001.1	0	0	0	0	0	0	0	0
NbC24066252g0001.1	0	0.112529	0	0.159881	0.065579	0.0648125	0.0738463	0
NbC24069745g0001.1	0	0	0	0	0.131158	0	0	0.130995
NbC24070081g0001.1	0.325354	0.337587	0.324978	0.373055	0.459053	0.5185	0.59077	0
NbC24070121g0001.1	0	0	0	0	0	0	0	0
NbC24070589g0002.1	0.216902	0.900233	0.216652	0.692817	0.721369	0.25925	0.295385	0.130995
NbC24070867g0001.1	0	0	0	0	0	0	0	0
NbC24073411g0001.1	0	0	0	0	0	0	0	0
NbC24074475g0004.1	1.73522	1.35035	1.51656	1.38563	3.14779	1.49069	1.40308	1.30995
NbC24075231g0001.1	0	0	0	0	0	0	0	0
NbC24075527g0001.1	0	0	0	0	0	0	0	0
NbC24077855g0001.1	0	0.112529	0	0	0	0.0648125	0	0
NbC24077899g0001.1	0	0	0	0	0	0	0	0
NbC24079289g0001.1	0	0	0	0	0	0	0	0
NbC24079681g0002.1	0	0	0	0	0	0	0	0
NbC24079723g0001.1	0.325354	0.675174	0.649955	0.373055	1.04926	0.5185	0.516924	0.26199
NbC24079993g0001.1	0	0	0	0	0	0	0	0
NbC24080257g0001.1	71.6862	71.2309	66.0788	66.9368	64.2018	77.1269	62.4001	72.9641
NbC24081199g0001.1	0	0	0	0	0	0	0	0
NbC24081849g0001.1	0	0.112529	0	0	0	0	0	0
NbC24084343g0001.1	0.433805	0.112529	0.108326	0.159881	0.262316	0.0648125	0	0.130995
NbC24084661g0001.1	0	0	0	0	0	0	0	0
NbC24086542g0001.1	0	0	0	0	0	0	0	0
NbC24087050g0001.1	0.216902	0.225058	0.324978	0.746111	1.04926	0.5185	0.221539	0.523979
NbC24087466g0001.1	0	0	0.216652	0	0.065579	0.129625	0	0
NbC24088562g0001.1	0	0	0	0	0	0	0	0
NbC24088802g0001.1	3.14508	3.82599	1.94987	3.09103	4.78727	3.6295	2.51077	4.19184
NbC24089638g0001.1	0	0	0	0	0	0	0	0
NbC24091158g0001.1	0	0	0	0	0	0	0	0
NbC24092916g0001.1	0	0	0	0	0	0	0	0
NbC24092994g0001.1	1.40987	1.01276	0.541629	0.905992	1.37716	0.5185	0.295385	1.44094
NbC24093690g0001.1	0	0	0	0	0	0	0	0
NbC24094354g0001.1	4.77185	4.05105	2.38317	4.2102	4.19706	4.47207	2.36308	4.06084
NbC24094968g0001.1	0	0	0	0	0	0	0	0
NbC24097126g0001.1	0	0	0	0	0	0	0	0
NbC24097730g0001.1	0	0	0	0	0	0	0	0
NbC24100028g0001.1	0	0	0	0	0	0	0	0
NbC24101312g0001.1	0	0	0	0	0	0	0	0
NbC24103440g0001.1	1.30141	1.01276	2.81647	2.02516	0.918106	1.29625	0.812309	0.654974
NbC24109430g0001.1	0	0	0	0	0	0	0	0
NbC24111062g0001.1	0	0	0	0	0	0	0	0
NbC24112202g0001.1	0	0	0	0	0	0	0	0
NbC24113164g0002.1	5.85636	3.15081	2.49149	5.16948	6.09885	4.86094	3.0277	6.02576
NbC24113610g0001.1	0	0.225058	0	0.213175	0	0	0.147693	0
NbC24115362g0001.1	0	0	0	0	0	0	0	0
NbC24115748g0001.1	0	0	0	0	0	0	0	0
NbC24116892g0001.1	0	0	0	0	0	0	0	0
NbC24116914g0001.1	0	0	0	0	0	0	0	0
NbC24120808g0001.1	0	0	0	0	0	0	0	0
NbC24121238g0001.1	0.216902	0	0.216652	0.319762	0.524632	0	0.0738463	0.130995
NbC24125786g0002.1	0	0	0	0	0	0	0	0
NbC24126686g0001.1	0	0	0	0	0	0	0	0
NbC24126888g0001.1	0.216902	0.112529	0	0.159881	0	0.129625	0.0738463	0.130995
NbC24127126g0001.1	0.108451	0.112529	0.108326	0.159881	0.327895	0	0.516924	0.130995
NbC24128202g0001.1	0	0	0	0	0	0	0	0
NbC24133056g0002.1	0	0	0.216652	0.159881	0.327895	0.0648125	0.0738463	0
NbC24135134g0001.1	0	0	0	0	0	0	0	0
NbC24137056g0001.1	0	0	0	0	0	0	0	0
NbC24137744g0001.1	0	0	0	0	0	0	0	0
NbC24138440g0002.1	0.108451	0.225058	0	0.159881	0.065579	0.0648125	0.0738463	0.130995
NbC24139746g0001.1	2.06057	0.675174	1.29991	1.6521	2.8199	1.62031	1.47693	1.04796
NbC24140330g0001.1	0	0	0	0	0	0	0	0
NbC24141102g0002.1	0	0	0	0	0	0	0	0
NbC24144256g0001.1	0	0	0	0	0	0	0	0
NbC24148431g0001.1	12.3634	11.8156	4.87466	11.0851	11.0173	12.2496	6.27693	12.0515
NbC24150629g0001.1	0	0	0	0	0	0	0	0
NbC24151891g0001.1	0	0	0	0	0	0	0	0
NbC24152731g0002.1	2.49438	2.13805	2.70815	2.93115	2.29527	2.00919	2.43693	1.83393
NbC24153167g0001.1	0	0	0	0.0532936	0	0	0	0
NbC24154579g0002.1	47.1763	35.1091	17.4405	39.1708	68.0054	53.924	21.5631	50.302
NbC24155925g0001.1	5.53101	4.16358	3.24978	5.0096	5.04958	6.67569	3.54462	3.92985
NbC24156043g0001.1	0	0	0	0	0	0	0	0
NbC24157281g0001.1	0	0	0	0	0	0	0	0
NbC24157441g0001.1	0.542256	0.562645	0.433303	1.11917	0.721369	1.29625	0.59077	0.916964
NbC24159831g0001.1	3.90424	2.13805	2.27484	1.86528	1.70505	3.30544	2.43693	5.1088
NbC24160679g0001.1	2.38593	2.58817	2.05819	2.61139	1.96737	2.074	1.84616	0.916964
NbC24160803g0001.1	1.08451	0.900233	1.29991	0.58623	1.11484	0.777751	1.32923	1.04796
NbC24161617g0001.1	7.15778	4.72622	4.44136	6.12877	8.06622	6.48125	4.57847	6.68074
NbC24162159g0001.1	0	0	0	0	0	0	0	0
NbC24164090g0001.1	0.108451	0.675174	0.324978	0.692817	1.37716	0.842563	0.221539	0.654974
NbC24168486g0001.1	0	0	0	0	0	0	0	0
[truncated: 75,714 more rows]

## Sheet: S. prinophyllum
geneid	MVM1	MVM2	TM1	TM2	FM1	FM2	SIM1	SIM2
[truncated: 47,900 more rows]
