# Supplementary material for: The evolution of inflorescence diversity in the nightshades and heterochrony during meristem maturation
Source: HighWire-hosted journal article supplement (doi:10.1101/gr.207837.116), 2016-11-07
Supplement: Supplemental_Table_S7.xlsx [file Supplemental_Table_S7.xlsx]

## Sheet: S. lycopersicum
geneid	groupEVM-groupMVM	groupEVM-groupLVM	groupEVM-groupTM	groupEVM-groupFM	groupMVM-groupLVM	groupMVM-groupTM	groupMVM-groupFM	groupLVM-groupTM	groupLVM-groupFM	groupTM-groupFM	M82_EVM1	M82_EVM2	M82_FM1	M82_FM2	M82_LVM1	M82_LVM2	M82_MVM1	M82_MVM2	M82_SIM1	M82_SIM2	M82_SYM1	M82_SYM2	M82_TM1	M82_TM2
Solyc00g008570.2.1			Y								3.67419	0.549085	0.22061	2.43428	0.848531	0.591482	1.55955	0.33614	1.28517	0.219809	0.283418	2.20454	0.40041	0.415183
Solyc00g008580.1.1				Y							0.75368	1.06385	3.52975	1.73877	0.742465	2.43165	1.7155	1.97949	2.82737	1.13045	2.17287	2.43486	1.83045	0.830367
Solyc00g009030.1.1							Y				2.16683	1.30408	0.882438	1.24612	2.01526	1.44584	3.43101	1.86744	0.856779	0.942039	1.98392	3.19165	1.08683	1.72005
Solyc00g009040.2.1			Y	Y			Y		Y	Y	2.63788	1.88748	10.6996	11.7077	5.09119	3.35173	3.1191	2.35298	10.367	11.4615	5.8573	3.6523	4.86212	5.30841
Solyc00g009110.2.1							Y				10.2689	11.4621	8.60377	6.81018	10.5006	10.5152	16.8431	14.0432	5.39771	4.96141	11.8091	13.4576	10.0675	11.2989
Solyc00g009120.2.1					Y	Y	Y				4.61629	5.04472	3.41945	2.60815	1.9092	3.54889	8.73347	4.6686	2.48466	1.19325	3.96785	2.82971	2.51686	3.67734
Solyc00g013120.2.1							Y				1.31894	0.686356	1.43396	2.28938	1.2728	0.657202	0.623819	0.63493	2.82737	2.07249	2.17287	2.43486	1.71604	0.741399
Solyc00g020010.1.1								Y	Y		0.75368	0.995217	1.54427	1.47795	0.636398	0.657202	1.40359	0.896372	1.37085	1.50726	2.26734	1.8097	1.71604	1.7497
Solyc00g030100.1.1				Y			Y		Y	Y	1.69578	2.26498	5.84615	5.94079	2.65166	2.23449	2.65123	2.53972	4.36958	5.55803	3.96785	5.29748	3.08888	2.31316
Solyc00g044350.2.1				Y			Y		Y	Y	38.2493	27.6945	6.39768	5.33222	37.1232	26.2881	41.1721	30.6634	7.96805	6.84549	49.0313	37.2139	17.618	19.306
Solyc00g050430.2.1			Y	Y		Y	Y	Y	Y	Y	18.2768	16.5412	84.3831	101.022	12.728	15.4442	14.9717	12.0637	64.6012	66.9476	22.8624	31.6861	28.8295	44.5136
Solyc00g068980.1.1				Y							52.475	111.052	243.774	122.496	74.3525	175.999	84.5275	148.35	192.604	62.9596	192.819	191.236	139.972	60.2312
Solyc00g098560.2.1									Y		3.95682	3.50042	5.62554	3.82529	1.69706	2.56309	4.67864	3.73488	4.2839	3.70535	3.40101	4.34327	3.08888	3.35112
Solyc00g099580.1.1						Y					1.31894	1.02953	0.992743	2.23142	1.2728	1.11724	0.467864	0.896372	2.82737	2.07249	1.41709	1.51356	1.43004	2.96559
Solyc00g117450.2.1									Y	Y	2.73209	2.26498	1.54427	1.10122	2.22739	3.87749	1.55955	2.35298	2.05627	1.41306	1.0392	1.74389	3.26048	3.9739
Solyc00g118690.1.1				Y							1.97841	2.60815	5.29463	5.2163	3.92446	3.94321	4.05482	3.73488	2.99873	4.01937	5.19599	7.73234	4.74772	3.52906
Solyc00g143770.1.1			Y								5.74681	2.43656	1.65457	3.36162	4.03052	2.56309	4.36673	1.41926	3.5128	1.91548	2.36181	2.731	1.43004	1.45314
Solyc00g156980.2.1				Y							35.423	33.2196	9.1553	15.8807	17.2888	23.4621	24.3289	17.7407	11.6522	12.5291	21.9176	25.9938	18.0184	27.8469
Solyc00g170200.1.1	Y	Y	Y	Y			Y				22.6104	22.5125	3.86067	4.54978	6.25792	6.44058	8.10965	9.37456	7.02559	3.98797	5.57388	3.22455	5.54854	4.68564
Solyc00g179240.1.1				Y			Y		Y	Y	2.44946	2.29929	0.441219	0.927343	3.71232	2.62881	4.99055	2.46502	0.771102	0.942039	3.96785	5.46199	2.40246	2.31316
Solyc01g005000.2.1			Y	Y		Y	Y	Y	Y		6.87733	4.59859	23.0537	23.7632	6.04579	4.66613	3.89887	4.818	59.1178	67.2616	8.12464	7.00846	20.9929	21.7378
Solyc01g005010.2.1				Y			Y		Y	Y	11.7763	10.364	0.772133	0.695507	17.8192	10.5809	14.6598	11.9143	1.11381	0.879237	13.793	13.3589	7.26458	9.87543
Solyc01g005130.2.1			Y	Y		Y	Y		Y	Y	7.25417	6.07425	1.10305	1.39101	4.87905	5.12617	9.98111	7.99265	2.74169	3.42274	5.00705	8.2588	2.34526	3.2325
Solyc01g005270.2.1				Y							14.791	16.85	6.8389	7.33181	11.3491	10.4495	14.0359	12.8853	7.28263	8.82377	12.7538	14.675	13.2135	13.5824
Solyc01g005290.2.1		Y	Y	Y	Y	Y	Y		Y	Y	19.2189	18.7032	2.64731	2.37632	7.95498	7.1635	19.6503	19.0479	5.8261	3.92516	7.08544	7.00846	4.57611	6.22775
Solyc01g005300.2.1			Y	Y		Y	Y				2.26104	2.19634	5.51524	8.46201	4.24266	4.20609	2.49528	3.51079	8.65347	7.88173	4.44021	5.59361	7.15018	7.29536
Solyc01g005440.2.1				Y							124.357	114.519	246.862	264.38	145.417	129.797	127.883	133.634	250.265	280.005	193.574	211.241	239.274	229.418
Solyc01g005560.2.1						Y					144.707	139.571	162.589	166.661	133.325	162.46	106.985	107.938	231.502	247.819	134.057	134.609	299.85	265.035
Solyc01g005590.2.1							Y				10.0805	7.92741	6.17707	5.30324	15.1675	7.42638	17.6229	6.08786	7.79669	6.06045	11.1478	10.4962	6.97857	7.08777
Solyc01g006320.2.1		Y	Y								3.10893	3.87791	2.75762	2.55019	2.43953	1.18296	2.18337	2.12888	1.45653	2.22949	2.55076	2.96132	1.31563	1.60142
Solyc01g006330.2.1			Y	Y							7.34838	6.9322	3.52975	2.78203	4.34872	3.81177	5.61437	6.12521	3.42712	3.04593	3.21207	3.45488	3.66089	3.38078
Solyc01g006390.2.1		Y	Y	Y			Y		Y		67.9255	55.3889	277.527	247.05	150.614	98.3174	92.7931	66.8918	130.916	122.025	258.477	257.372	140.944	133.066
Solyc01g006400.2.1				Y			Y		Y		534.83	521.322	1426.68	1263.45	658.248	605.217	461.938	421.631	1666.18	1611.92	821.534	902.644	920.371	809.963
Solyc01g006430.2.1				Y							463.325	493.25	953.916	1081.25	680.946	609.686	549.897	660.813	950.083	956.798	565.607	666.758	818.552	711.891
Solyc01g006540.2.1				Y			Y		Y	Y	0.0942101	1.06385	6.72859	7.33181	2.33346	1.24868	1.7155	0.97107	6.85424	2.82612	6.51861	3.78391	1.37283	1.30486
Solyc01g006660.1.1			Y	Y		Y	Y	Y	Y		5.18155	5.28494	101.149	72.1879	6.78825	10.7781	6.86201	5.67702	235.529	208.316	7.46333	4.08004	98.5581	78.9441
Solyc01g006690.2.1			Y	Y		Y	Y				10.5515	11.119	2.86792	5.62202	6.15185	5.91482	8.42156	10.6444	3.17008	2.82612	4.8181	6.12007	3.54649	4.7153
Solyc01g006780.2.1						Y	Y				6.31207	5.3879	3.30914	3.41958	8.80351	3.87749	9.82515	6.16256	2.74169	2.76332	7.55781	8.09428	2.63127	4.38908
Solyc01g006790.2.1							Y				18.9362	15.2714	11.582	9.7371	20.8951	16.8901	29.0076	16.6202	9.42457	10.4566	20.4061	20.466	11.5547	12.6631
Solyc01g006930.2.1				Y			Y	Y	Y	Y	12.9068	15.1685	4.08128	5.3612	23.0164	20.7019	19.4944	19.8696	4.96932	4.08217	20.9729	20.137	11.1543	9.40094
Solyc01g007100.2.1				Y			Y		Y	Y	60.3886	62.6986	20.4064	22.4591	49.0027	44.624	65.501	59.3099	36.7558	35.1695	39.773	46.065	48.3352	51.5717
Solyc01g007190.2.1									Y		1.60157	2.02475	3.97097	3.18774	2.65166	0.722922	2.65123	2.42767	1.62788	1.50726	1.98392	1.48066	1.94485	2.46144
Solyc01g007260.2.1		Y	Y	Y	Y	Y	Y		Y	Y	2.73209	2.29929	0	0.318774	1.06066	0.788642	3.27505	2.57707	0.514068	0.973441	1.22814	1.54647	1.65884	0.800711
Solyc01g007270.1.1			Y			Y				Y	4.89892	5.52517	4.19158	5.10039	9.75811	8.21502	4.8346	5.67702	10.7097	10.6764	6.42414	7.89686	15.7876	15.3914
Solyc01g007700.2.1						Y	Y	Y			2.54367	1.61294	1.32366	1.39101	2.43953	2.82597	3.1191	3.17465	0.942457	0.753631	0.472363	2.59938	0.80082	1.57177
Solyc01g007720.2.1			Y								5.74681	3.0886	1.87518	2.89795	2.65166	3.15457	5.14651	2.20358	3.42712	1.16185	2.17287	2.36906	2.28806	1.33452
Solyc01g007890.1.1			Y	Y		Y	Y		Y		1.03631	0.583403	2.64731	4.75263	0.954598	1.3144	0.779774	0.485535	1.62788	1.25605	2.55076	2.50067	2.17365	2.0166
Solyc01g008110.2.1							Y				346.881	329.623	625.759	692.406	320.108	343.519	297.718	312.348	526.063	576.151	498.343	548.404	425.693	435.409
Solyc01g008800.1.1			Y	Y		Y	Y				2.73209	3.05429	0.551524	1.04326	1.48493	1.51156	1.24764	2.16623	1.62788	1.28745	0.850253	2.07293	0.743619	0.919334
Solyc01g008850.2.1		Y	Y	Y			Y		Y		6.87733	7.17242	0.661829	1.2751	1.48493	3.15457	3.1191	3.99633	1.11381	2.04109	2.92865	3.6523	1.77324	2.40213
Solyc01g008920.2.1		Y									4.23945	4.35836	2.86792	3.3906	2.12133	2.03733	3.27505	3.84693	2.57034	1.91548	2.26734	2.50067	3.31768	2.90628
Solyc01g009080.2.1						Y	Y				9.13838	7.20674	5.62554	4.92651	8.16711	5.98054	11.6966	9.82274	4.79796	4.773	5.8573	6.21878	4.57611	4.2408
Solyc01g009240.2.1		Y	Y			Y					1.50736	2.36793	1.10305	0.811425	0.106066	1.05152	2.96314	1.15781	0.942457	0.565224	0.283418	0.690975	0.457611	0.266904
Solyc01g009340.2.1			Y	Y		Y	Y				20.0667	19.7327	7.50072	9.27343	9.86418	10.2523	20.4301	15.5745	8.82483	8.63536	16.2493	20.7622	7.60779	8.27401
Solyc01g009500.2.1			Y	Y							7.15996	6.07425	2.86792	3.33264	4.13659	3.35173	6.08224	5.07944	3.17008	2.60631	4.72363	4.70521	3.20328	3.02491
Solyc01g009720.1.1									Y		1.41315	1.06385	1.65457	1.9706	1.06066	0.722922	1.09168	1.56865	1.79924	2.04109	2.26734	1.8755	1.94485	1.18624
Solyc01g009760.2.1			Y	Y		Y	Y				5.36997	6.3488	2.64731	2.66611	3.28806	4.33753	5.92628	5.30353	2.39898	3.35994	5.38494	4.37618	2.11645	2.93594
Solyc01g009860.2.1						Y		Y			6.68891	4.77018	6.8389	6.52038	5.30332	4.53469	4.67864	4.22042	5.99746	4.30198	7.17992	8.19299	9.38103	10.1127
Solyc01g010020.2.1							Y				4.14524	4.28973	2.97823	2.60815	4.56086	3.48317	6.70606	5.34088	2.57034	2.98312	5.10152	4.17875	2.68847	3.67734
Solyc01g010130.2.1		Y	Y	Y	Y	Y	Y	Y		Y	14.4141	13.7271	37.9448	43.9619	46.6692	51.3932	21.8337	17.2178	108.897	101.332	15.399	24.5132	124.642	119.187
Solyc01g010150.2.1			Y			Y				Y	105.327	107.449	187.518	160.894	197.177	224.106	131.782	150.591	456.321	388.905	222.483	226.113	391.258	363.523
Solyc01g010180.2.1			Y	Y			Y		Y	Y	16.3925	14.5164	2.97823	3.07182	7.74285	7.8207	8.2656	8.29144	3.17008	4.20778	3.68443	2.59938	6.52096	6.82087
Solyc01g010220.2.1						Y					3.01472	3.84359	4.08128	3.41958	4.03052	5.12617	2.18337	2.87586	4.02686	3.07733	3.87338	2.27035	6.69257	6.55396
Solyc01g010240.2.1			Y	Y		Y	Y	Y	Y	Y	5.36997	5.18199	0.882438	0.492651	3.71232	4.20609	4.05482	3.95898	0.685424	0.125605	7.55781	5.65942	1.54444	2.07592
Solyc01g010250.2.1										Y	5.36997	5.25063	10.148	7.85344	4.77299	5.8491	6.23819	6.16256	2.99873	3.04593	9.91962	7.83105	3.60369	4.35942
Solyc01g010390.2.1				Y		Y	Y				3.7684	3.80928	1.21335	1.47795	2.33346	1.97161	4.67864	4.14572	1.62788	1.22465	2.36181	2.20454	1.25843	2.69869
Solyc01g010430.2.1			Y	Y							0.47105	0.892263	1.32366	1.82571	0.636398	1.38012	1.40359	0.63493	1.71356	1.75847	1.22814	2.00712	2.05925	1.45314
Solyc01g010710.2.1			Y	Y		Y	Y	Y	Y		0.847891	2.36793	6.72859	6.66528	0.848531	1.3144	1.40359	1.04577	8.31076	8.00733	1.51156	1.71099	5.43414	4.89323
Solyc01g010970.2.1				Y			Y		Y		29.7704	27.0081	89.2366	92.3576	37.6536	37.8548	31.5029	31.1863	57.1472	59.2543	51.9599	53.4025	50.0512	58.0367
Solyc01g014110.2.1			Y			Y	Y				1.31894	2.98565	0.992743	1.36204	1.80313	1.44584	2.18337	2.95056	1.28517	0.659428	1.32262	1.77679	0.972424	0.474495
Solyc01g014120.2.1				Y			Y				1.8842	3.19156	0.772133	1.44897	1.80313	1.57728	3.74292	1.86744	0.942457	0.973441	3.7789	2.59938	0.915223	1.80901
Solyc01g014250.2.1		Y	Y	Y	Y	Y	Y	Y		Y	5.6526	5.79971	33.0914	30.5444	22.4861	23.725	5.77033	7.69386	70.77	66.0056	12.5649	13.8195	71.9594	72.9536
Solyc01g014280.2.1	Y	Y	Y	Y		Y					18.5594	28.7583	6.06676	2.2604	2.01526	9.20083	7.48583	9.33721	4.88364	4.64739	7.08544	9.24591	1.77324	2.69869
Solyc01g014620.1.1				Y					Y		2.54367	1.9218	0.551524	0.956323	1.06066	2.23449	1.24764	1.56865	0.685424	0.785033	1.70051	1.8097	1.65884	1.63108
Solyc01g015060.1.1	Y					Y	Y				2.16683	1.88748	1.21335	1.62285	0.848531	1.97161	1.09168	0.560233	1.19949	1.63287	1.51156	1.51356	2.74567	2.28351
Solyc01g034080.1.1			Y								0.65947	0.926581	1.65457	1.59387	0.954598	2.03733	0.779774	1.26986	1.28517	2.13529	1.22814	1.57937	1.54444	1.86832
Solyc01g049930.2.1			Y	Y			Y		Y		0.47105	0.411814	1.32366	2.37632	0.742465	0.920083	1.40359	0.597581	1.19949	0.785033	0.188945	0.658072	0.972424	1.15658
Solyc01g057270.2.1										Y	4.61629	4.80449	3.52975	3.07182	6.25792	5.32333	3.1191	4.03367	5.14068	4.05077	3.96785	4.21166	6.17775	7.2064
Solyc01g058030.1.1			Y	Y		Y	Y		Y		58.2218	60.3307	12.5747	10.3167	43.063	41.0751	58.3271	56.21	11.9092	11.0533	47.4252	41.6559	20.6497	21.8268
Solyc01g058040.1.1		Y	Y	Y			Y		Y	Y	7.63101	7.75583	0.772133	0.608569	3.07593	3.35173	3.1191	4.36981	0.685424	0.502421	3.49549	5.00134	2.74567	2.25385
Solyc01g058320.2.1			Y	Y		Y	Y	Y	Y		2.8263	3.0886	8.49347	8.72282	1.69706	1.77444	4.99055	2.31563	7.88237	7.75612	4.34574	3.29036	8.35141	6.25741
Solyc01g058720.2.1				Y					Y	Y	8.00785	8.03037	3.86067	3.04284	6.47005	7.68926	6.5501	6.38665	6.5972	4.7416	7.46333	7.17298	7.49339	8.74851
Solyc01g059880.2.1				Y							120.966	112.322	53.939	53.641	82.8379	100.946	91.3895	98.078	46.0091	52.9112	81.3409	80.4164	73.3894	73.2502
Solyc01g059950.1.1				Y			Y		Y	Y	1.60157	1.95612	0.110305	0.144897	2.22739	1.77444	2.18337	2.46502	0.171356	0.47102	1.32262	2.07293	1.94485	2.16488
Solyc01g060210.2.1		Y	Y	Y		Y	Y				1.97841	1.88748	1.10305	0.376733	0.636398	0.722922	1.87146	1.15781	0.942457	0.659428	0.850253	1.38195	0.572014	0.593119
Solyc01g060490.2.1				Y			Y		Y	Y	1.50736	1.85316	0.22061	0.463672	1.2728	1.3144	1.40359	1.64335	0.514068	0.314013	1.51156	1.41485	1.08683	1.33452
Solyc01g065540.2.1			Y	Y		Y					62.2728	60.3993	127.181	130.524	115.082	98.9089	72.2071	80.5988	204.428	219.213	77.562	101.902	160.622	156.524
Solyc01g065980.2.1			Y	Y		Y	Y				121.625	104.807	45.6662	43.9329	94.5052	71.0435	118.526	103.606	75.0539	71.4066	112.422	110.457	48.85	58.6002
Solyc01g066450.2.1				Y			Y		Y	Y	1.31894	1.47567	6.17707	5.99875	1.9092	1.643	1.7155	1.6807	1.5422	0.910638	1.22814	1.57937	1.14403	1.06761
Solyc01g066470.2.1			Y			Y		Y			1.60157	1.09817	2.97823	1.94162	1.2728	1.18296	1.87146	1.15781	1.97059	2.3237	6.61308	6.4491	3.43209	3.41043
Solyc01g066510.1.1				Y			Y			Y	6.97154	9.16286	1.98549	3.27468	3.60626	5.91482	7.01797	6.61074	5.65474	4.8672	5.8573	4.77102	6.57816	4.89323
Solyc01g066630.1.1									Y		4.99313	3.15724	2.97823	2.34734	8.06105	3.41745	5.92628	3.58549	4.36958	2.00968	4.25127	2.7968	3.26048	2.58007
Solyc01g066720.2.1			Y	Y		Y	Y		Y		37.9667	37.8182	182.996	173.645	60.8821	51.3275	42.8876	37.4609	117.464	115.117	67.5479	55.4754	94.1536	87.4257
Solyc01g066880.2.1	Y	Y				Y	Y	Y	Y		8.94996	9.81489	10.3686	7.88242	34.1534	22.2791	26.3564	21.4382	3.76983	3.23434	7.9357	8.02847	8.0082	10.2313
Solyc01g067510.2.1				Y		Y	Y		Y		3.48577	4.6329	13.2366	11.4179	5.40939	4.66613	4.67864	2.80116	11.2238	8.85517	3.1176	3.32326	8.0082	7.14708
Solyc01g067540.1.1		Y	Y	Y	Y	Y	Y	Y	Y	Y	0.18842	0	3.08853	2.23142	22.2739	21.7534	0.31191	0.112047	86.1063	87.1072	0.755781	1.25034	88.0902	84.2229
Solyc01g068080.2.1				Y							1.60157	2.43656	4.08128	4.49182	2.33346	2.62881	3.43101	2.27828	4.96932	4.8358	2.55076	3.48778	4.63332	3.67734
Solyc01g068140.2.1							Y				1.31894	1.37271	2.4267	2.75305	1.69706	1.51156	1.55955	0.859023	3.68415	2.3551	1.98392	3.06003	1.54444	1.4828
Solyc01g068250.2.1				Y			Y			Y	2.73209	3.60337	1.54427	1.30408	1.69706	2.43165	5.77033	2.83851	1.79924	1.03624	2.45629	2.59938	3.03168	3.17319
Solyc01g068360.2.1		Y		Y			Y		Y	Y	1.31894	1.81884	4.85341	5.15835	0.424266	0.722922	1.09168	1.00842	1.11381	1.60147	0.566835	1.05291	0.915223	1.39383
Solyc01g068460.2.1			Y				Y			Y	1.8842	1.68157	0.882438	2.08652	0.636398	1.24868	0.779774	0.709628	1.5422	0.973441	1.0392	0.723879	0.40041	0.533807
Solyc01g073700.2.1			Y	Y		Y	Y		Y		3.01472	2.67679	0	0.724487	2.33346	1.57728	2.80719	1.71805	0.942457	1.75847	1.22814	2.99423	0.915223	1.06761
Solyc01g074030.2.1	Y	Y	Y	Y							42.2061	43.412	9.59652	11.244	13.0462	21.0305	24.3289	17.8527	9.16754	7.34791	13.9819	16.5176	11.1543	13.968
Solyc01g079170.2.1				Y		Y	Y		Y		3.86261	3.32883	1.32366	1.18816	4.03052	3.61461	4.05482	4.70595	1.19949	1.09905	2.0784	3.75101	1.54444	2.46144
Solyc01g079260.2.1				Y							5.08734	5.52517	1.76488	2.14448	3.81839	2.76025	3.89887	3.47344	5.055	4.61599	5.66835	4.14585	2.34526	3.2325
Solyc01g079360.2.1				Y							1.22473	2.1277	4.19158	3.2457	1.37886	2.16877	3.43101	2.20358	1.97059	1.97828	3.40101	3.15874	2.11645	1.98695
Solyc01g079440.1.1				Y			Y			Y	1.69578	1.57862	3.19884	3.5355	2.65166	2.30021	1.09168	1.49395	1.45653	1.50726	1.88945	1.38195	1.25843	1.54211
Solyc01g079480.2.1				Y			Y				58.8813	54.8742	138.432	147.534	75.095	75.9068	65.8129	49.0017	112.752	116.656	72.1771	61.069	100.789	92.9121
Solyc01g079530.2.1				Y			Y		Y	Y	1.60157	2.5052	0.882438	1.15918	2.75773	1.90589	3.1191	2.57707	1.28517	0.847835	1.88945	2.33615	2.57406	2.07592
Solyc01g079570.2.1				Y			Y		Y	Y	17.8057	15.546	8.49347	7.82446	22.38	27.011	19.8063	15.7239	26.9029	24.336	17.5719	20.2028	21.7365	20.5219
Solyc01g079620.2.1					Y	Y					4.33366	3.43178	4.08128	3.68039	2.33346	2.49737	3.74292	5.49028	2.14195	1.31886	3.49549	2.56648	1.88765	1.92764
Solyc01g079740.2.1				Y			Y		Y	Y	4.61629	4.25541	0	0.260815	3.07593	3.41745	3.74292	2.98791	0.685424	0.376816	3.87338	3.94843	2.51686	4.41874
Solyc01g079790.2.1			Y								14.6968	14.2762	7.16981	8.7518	6.04579	8.34646	8.73347	10.0842	6.34017	7.53631	6.32966	7.99557	5.09093	6.70224
Solyc01g079880.2.1							Y		Y	Y	61.0481	58.7864	104.017	114.817	41.7902	41.4037	51.4651	48.4041	155.42	191.077	42.4182	51.3954	49.5364	53.2621
Solyc01g079950.2.1				Y			Y		Y	Y	2.54367	1.33839	5.73585	6.69426	1.80313	2.43165	1.87146	2.16623	5.31203	5.99765	1.70051	2.56648	2.28806	3.64768
Solyc01g080020.2.1				Y			Y		Y		24.5888	26.6993	48.9753	61.3495	21.1072	32.1372	26.6683	24.6502	54.4055	68.7375	36.5609	47.1508	49.136	49.3772
Solyc01g080220.2.1			Y	Y		Y		Y			0.37684	0.617721	1.87518	1.36204	0.318199	0.985803	0.31191	0.896372	6.16881	5.43243	0.944726	0.263229	1.88765	2.34282
Solyc01g080380.2.1		Y	Y	Y	Y	Y			Y	Y	1.31894	0.926581	3.52975	1.53591	6.57612	5.65194	3.58696	1.15781	2.48466	2.4807	1.70051	1.31614	7.60779	7.26571
Solyc01g080410.2.1										Y	2.16683	2.19634	1.21335	1.68081	2.01526	2.82597	2.96314	3.09995	1.97059	1.57007	1.60603	2.07293	3.37488	3.4994
Solyc01g080460.2.1							Y				4.42787	3.98087	2.4267	2.92693	5.62152	2.95741	4.05482	6.87219	2.3133	3.04593	2.26734	4.27747	2.68847	3.46975
Solyc01g080540.2.1				Y			Y				52.1924	60.468	27.4659	27.7044	39.987	44.6897	51.933	60.8039	31.2725	26.5655	49.8815	54.4883	33.52	35.5278
Solyc01g080580.2.1				Y			Y		Y	Y	21.9509	22.4782	6.8389	5.18733	21.8497	19.256	23.3932	25.2478	4.45525	3.17153	31.2704	36.2926	12.4699	15.9252
Solyc01g080770.2.1		Y	Y	Y		Y	Y				25.0599	29.376	6.61829	8.23017	8.59138	11.3039	20.8979	17.8154	10.367	11.8383	12.9427	18.6234	6.97857	8.9561
Solyc01g080900.2.1		Y		Y		Y	Y	Y	Y	Y	2.16683	2.47088	11.4717	9.47629	1.06066	1.05152	1.55955	1.30721	10.7097	13.3142	1.88945	1.90841	3.20328	3.85527
Solyc01g080910.2.1			Y	Y		Y	Y		Y		23.1757	27.0768	78.9782	84.0405	22.8043	31.0856	22.9254	24.8743	71.7124	68.6433	33.0654	43.1695	54.227	52.0758
Solyc01g080960.2.1		Y	Y	Y	Y	Y	Y	Y		Y	0.0942101	0.102953	12.0232	11.273	6.68218	7.62354	0.155955	0.373488	39.1548	36.7709	1.22814	1.25034	40.9562	35.6168
Solyc01g081040.2.1			Y			Y		Y		Y	1.03631	1.33839	1.10305	0.869384	0.742465	1.57728	0.31191	1.6807	2.74169	2.26089	1.41709	2.13873	4.1185	2.90628
Solyc01g081210.2.1				Y					Y		1.31894	1.88748	0.330914	0.695507	1.80313	1.77444	1.40359	1.12047	0.514068	0.157007	0.566835	0.756782	1.20123	0.771055
Solyc01g081250.2.1			Y		Y			Y	Y		1.8842	4.83881	8.71408	2.28938	1.37886	1.05152	3.1191	9.22516	1.79924	0.973441	1.32262	0.263229	9.26663	9.46025
Solyc01g081340.2.1						Y					1.78999	1.30408	0.992743	1.62285	1.06066	1.3144	0.935729	0.784326	0.856779	0.753631	0.850253	1.38195	2.17365	1.98695
Solyc01g081570.2.1										Y	35.0461	28.072	16.656	17.5036	26.4105	24.7765	24.017	23.0816	26.7315	29.0462	21.0674	32.1468	34.1493	35.9727
Solyc01g086870.2.1				Y							16.2041	15.8548	7.39042	7.65058	9.12171	10.0552	14.0359	11.4661	6.93991	6.78268	12.6593	13.0627	8.63742	9.28231
Solyc01g086920.2.1				Y							45.0324	42.8629	17.9797	21.0971	28.5319	30.0998	33.0624	32.5308	13.4514	13.2828	24.6573	24.3157	31.0032	36.1803
Solyc01g087050.2.1			Y	Y		Y	Y		Y	Y	5.36997	4.25541	0.551524	0.231836	2.12133	3.35173	4.52269	2.95056	0.42839	0.533822	2.92865	2.96132	1.08683	1.95729
Solyc01g087090.2.1									Y		2.35525	2.67679	3.52975	5.2163	0.954598	2.43165	2.80719	2.27828	2.57034	3.42274	1.60603	2.89552	2.91727	3.70699
Solyc01g087200.2.1				Y			Y				12.9068	15.2714	4.19158	6.20161	10.0763	10.4495	12.3204	13.1094	3.76983	4.61599	11.1478	13.0956	7.8366	8.71885
Solyc01g087450.2.1						Y	Y	Y	Y		2.44946	3.12292	5.95646	5.10039	2.33346	2.95741	3.74292	2.24093	5.31203	5.87205	3.7789	4.21166	5.83455	5.07117
Solyc01g087570.2.1				Y							30.6183	31.1949	15.6633	13.9681	25.0317	29.3769	38.2089	20.9153	15.9361	12.8117	28.3418	26.0596	20.6497	17.9418
Solyc01g087740.1.1		Y									3.67419	3.12292	2.75762	3.33264	1.591	1.70872	1.87146	2.80116	3.25576	3.86236	6.70755	4.96844	1.88765	2.34282
Solyc01g087750.2.1			Y	Y		Y		Y			7.5368	7.41265	3.30914	2.28938	5.40939	4.20609	4.36673	4.36981	1.37085	2.3237	4.44021	5.19877	1.71604	2.2242
Solyc01g087770.2.1			Y	Y		Y	Y		Y		3.86261	3.36315	1.10305	1.15918	3.18199	2.30021	3.89887	3.62284	1.19949	1.35026	1.60603	2.50067	1.25843	1.51245
Solyc01g087810.2.1								Y			1.8842	2.84838	1.32366	1.9706	3.50019	3.54889	1.87146	2.12888	1.02814	1.66427	4.53468	5.4949	1.31563	1.72005
Solyc01g087990.2.1				Y						Y	5.18155	6.28016	3.19884	2.81101	5.40939	5.8491	6.5501	5.34088	3.76983	4.7102	9.16384	7.14008	5.49134	6.28706
Solyc01g088300.2.1		Y	Y	Y		Y				Y	2.07262	2.74542	1.21335	0.782446	0.636398	0.591482	2.49528	0.746977	0.599746	0.879237	1.70051	1.8097	0.114403	0.237248
Solyc01g088400.2.1		Y	Y	Y		Y	Y		Y		145.837	152.989	26.4731	29.675	66.7158	74.5267	85.7751	97.5925	24.8466	26.6911	53.4715	55.4754	37.5813	42.1411
Solyc01g088430.2.1				Y			Y		Y	Y	0.47105	0.377496	2.64731	3.68039	1.06066	0.722922	0.467864	0.522884	1.79924	1.22465	3.21207	3.45488	0.858021	0.711743
Solyc01g088440.2.1								Y			1.22473	1.20112	1.76488	1.15918	3.07593	2.03733	2.96314	1.83009	1.62788	2.2923	1.60603	1.41485	1.48724	0.800711
Solyc01g088450.2.1						Y	Y	Y	Y		4.61629	3.22587	1.76488	1.9706	4.66692	4.40325	4.99055	3.2867	1.79924	2.3865	3.87338	3.52068	2.40246	1.57177
Solyc01g088660.2.1			Y			Y	Y	Y	Y		16.2041	12.629	31.1059	22.4301	13.4704	12.8812	13.2562	9.636	26.7315	26.7539	18.0443	21.2228	26.5987	32.4436
Solyc01g088780.2.1				Y			Y			Y	8.29049	6.65766	2.09579	2.86897	3.92446	5.58622	5.77033	5.22884	5.65474	4.7416	6.42414	7.63363	5.83455	6.52431
Solyc01g088790.2.1						Y					0.847891	1.16681	2.3164	1.56489	1.80313	1.05152	0.623819	1.08312	2.05627	1.57007	2.36181	2.92842	2.05925	1.95729
Solyc01g089850.2.1		Y		Y	Y	Y	Y		Y	Y	3.86261	5.14767	0.992743	0.927343	2.54559	2.10305	6.70606	4.03367	1.45653	1.13045	2.83418	4.40908	2.23086	2.60972
Solyc01g089910.2.1				Y			Y			Y	15.4504	13.4526	36.6212	41.4986	28.2137	17.0215	17.155	16.4335	11.3095	13.0001	29.381	27.8035	15.5588	19.484
Solyc01g089990.1.1									Y		1.60157	1.71589	0.992743	0.985302	2.43953	1.90589	1.55955	1.64335	1.28517	1.25605	1.32262	0.625168	1.08683	1.42349
Solyc01g090460.2.1									Y	Y	82.7164	79.9948	116.482	120.671	62.6852	55.5336	73.4547	76.9013	59.7175	61.0756	80.0183	78.0473	50.8521	50.0889
Solyc01g090630.2.1			Y	Y		Y	Y	Y		Y	0.65947	0.549085	1.54427	1.10122	0.848531	0.657202	0.779774	0.373488	3.42712	1.82128	0.283418	0.296132	3.43209	2.66904
Solyc01g090730.2.1				Y			Y		Y	Y	6.97154	6.65766	1.65457	1.59387	7.31858	6.11198	7.48583	5.15414	1.71356	1.63287	4.06232	4.70521	2.57406	4.38908
Solyc01g090790.2.1			Y	Y		Y	Y	Y			23.9294	21.8261	11.0305	8.78078	18.2434	12.4868	28.3838	27.9369	12.6803	13.2514	9.06937	8.91687	6.80697	6.70224
Solyc01g091010.2.1				Y			Y		Y		257.853	269.635	98.0609	133.827	262.939	237.841	253.583	241.871	14.4796	16.0461	304.107	311.794	155.817	178.114
Solyc01g091030.2.1				Y			Y		Y	Y	5.6526	5.73107	1.87518	1.94162	14.1068	6.70346	15.7514	4.9674	2.82737	3.17153	9.06937	7.83105	4.74772	6.31672
Solyc01g091040.2.1										Y	11.5878	9.88353	8.93469	10.7224	10.7127	10.0552	11.6966	10.2336	28.4451	25.6863	13.2262	14.346	20.7641	20.6109
Solyc01g091060.1.1									Y		0.847891	1.95612	0.992743	0.637548	1.591	3.02313	1.7155	1.49395	0.0856779	0.345414	0.283418	0.559361	1.14403	1.45314
Solyc01g091170.2.1		Y	Y	Y	Y	Y	Y	Y	Y	Y	4.80471	6.96652	425.115	421.333	22.6982	25.2365	7.79774	11.13	402.344	362.968	54.2273	53.238	203.58	140.184
Solyc01g091260.2.1				Y			Y		Y	Y	273.115	281.029	71.8084	33.1235	285.213	281.217	324.542	306.559	64.7725	37.1792	58.2896	35.6346	279.143	234.756
Solyc01g091400.2.1				Y			Y		Y	Y	30.8067	29.2731	7.72133	7.07099	46.351	36.2118	34.1541	32.4561	42.4963	32.6574	36.9388	30.1068	54.6274	51.2158
Solyc01g091420.1.1		Y	Y	Y	Y	Y	Y	Y	Y	Y	0	0	0.992743	0.0869384	3.71232	5.12617	0.155955	0.0373488	20.1343	16.2031	0.850253	0.0329036	28.3719	26.5124
Solyc01g091470.2.1		Y	Y	Y	Y	Y	Y		Y	Y	0.65947	0	0.441219	0.753466	2.33346	2.43165	0	0.224093	7.96805	7.66192	0	0.493554	4.91932	3.67734
Solyc01g091520.2.1				Y			Y				55.2071	50.9963	23.2743	22.517	48.3663	39.7607	62.6938	51.5414	23.4758	21.8239	47.4252	47.8089	30.7172	29.9822
Solyc01g091660.2.1		Y	Y	Y		Y	Y	Y	Y	Y	0.18842	0.446132	3.64006	3.5355	1.16673	1.44584	1.7155	0.298791	14.4796	7.75612	2.64523	2.04002	11.5547	8.54091
Solyc01g091770.2.1				Y			Y				12.6241	12.4917	4.41219	4.11508	6.78825	9.00366	13.88	9.93479	6.25449	4.08217	9.6362	9.80527	8.0082	8.4816
Solyc01g091930.2.1			Y		Y	Y				Y	1.03631	2.71111	1.76488	2.1155	4.03052	3.87749	0.623819	2.01684	2.65602	2.10389	2.92865	2.27035	3.8325	4.56702
Solyc01g092950.2.1							Y		Y	Y	41.3582	43.7895	23.7155	21.6766	78.5952	71.1092	67.6844	52.139	19.7059	14.0992	89.9379	94.203	57.8306	61.2099
Solyc01g093960.2.1	Y	Y		Y		Y	Y	Y	Y	Y	0.0942101	0.960899	59.7852	61.0018	0	0	0.31191	0.149395	3.5128	4.58459	2.26734	0.164518	0.858021	0.94899
Solyc01g094080.2.1		Y	Y								15.5447	16.5755	7.94194	10.6934	7.21252	8.28074	9.6692	11.0179	6.42585	7.1909	7.46333	8.75235	5.94895	7.68089
Solyc01g094170.2.1							Y				25.3425	27.9004	17.4282	15.4461	29.5925	30.6913	28.3838	35.0706	11.7379	10.7078	17.4774	17.6363	28.3719	28.9739
Solyc01g094490.2.1							Y				3.67419	4.97608	3.41945	3.21672	5.09119	6.24342	8.73347	6.38665	3.94119	2.63771	2.92865	3.45488	5.77734	5.45669
Solyc01g094870.1.1			Y	Y			Y		Y		4.05103	4.66722	20.4064	15.8228	7.31858	8.54362	4.8346	7.24567	14.6509	12.6547	9.73068	9.34462	11.2687	10.0237
Solyc01g094970.2.1			Y	Y		Y	Y		Y	Y	0.75368	1.47567	16.9869	16.6052	1.48493	2.03733	1.09168	0.821674	1.5422	1.22465	0.944726	1.05291	2.40246	2.58007
Solyc01g095070.2.1										Y	16.3925	18.2914	24.598	24.4877	12.5158	15.4442	18.5586	18.5997	12.3376	11.6499	15.399	14.0498	12.3555	11.3286
Solyc01g095150.2.1						Y					1.60157	1.44135	0.661829	1.62285	1.2728	1.643	3.43101	1.34456	0.685424	1.19325	1.70051	2.00712	0.514813	1.0083
Solyc01g095320.2.1				Y			Y		Y	Y	49.9313	54.7026	10.9202	7.4767	51.0179	50.4074	67.8403	81.8686	14.8223	7.00249	16.8161	14.8066	51.4813	36.892
Solyc01g095530.2.1			Y	Y		Y	Y		Y		32.314	29.9251	11.1408	9.24445	28.3197	17.7444	40.0804	32.1573	18.9348	19.092	22.1066	26.0267	14.9296	14.6797
Solyc01g095630.2.1			Y			Y		Y		Y	3.7684	2.64247	2.53701	3.62243	2.01526	2.10305	2.96314	2.12888	3.42712	5.65224	1.98392	2.69809	6.06335	7.79951
Solyc01g095960.2.1			Y	Y		Y	Y	Y	Y	Y	0.0942101	0.102953	9.92743	12.9538	0.424266	0.262881	0.155955	0.0373488	21.6765	27.3819	3.02312	3.84972	4.0041	3.26215
Solyc01g096070.2.1			Y	Y		Y	Y	Y	Y	Y	321.256	323.686	31.9884	33.1815	267.712	257.623	325.79	344.282	47.9796	49.2687	215.586	255.069	115.089	130.101
Solyc01g096080.2.1							Y				9.23259	10.364	14.4499	16.982	7.00038	9.39799	7.17392	7.46977	6.5972	6.09185	11.0533	12.6679	8.52301	8.42229
Solyc01g096100.2.1									Y		62.4613	63.0418	108.761	119.627	60.67	53.3648	75.794	68.9086	49.7789	52.9112	63.4856	67.7814	54.799	64.561
Solyc01g096120.2.1				Y			Y		Y	Y	9.79785	12.1142	0.882438	0.318774	8.69745	9.00366	10.7609	8.25409	0.599746	0.47102	10.7699	13.9511	8.52301	10.3796
Solyc01g096220.2.1				Y			Y			Y	47.0108	49.8638	16.5457	17.8514	33.517	31.94	45.3828	49.8607	15.2507	14.8214	32.3096	37.2798	37.1809	33.0664
Solyc01g096280.1.1				Y			Y		Y	Y	8.00785	9.16286	2.64731	2.63713	7.84891	9.26655	10.7609	8.29144	2.91305	1.88408	4.62916	4.37618	6.74977	7.62158
Solyc01g096370.2.1				Y							26.1904	28.3465	62.3222	61.1467	37.1232	32.4	31.9707	30.2899	69.1421	63.3678	46.4805	47.776	55.7714	49.3772
Solyc01g096410.2.1			Y			Y					11.8705	13.3153	23.6052	25.2121	17.1828	21.7534	12.4764	13.1094	24.4182	21.4785	8.31359	9.77236	36.4945	34.9644
Solyc01g096810.2.1				Y							44.6556	48.7999	96.2961	104.993	65.7612	64.3401	67.8403	69.917	104.955	112.637	69.0595	86.9642	75.7919	76.4234
Solyc01g096860.1.1							Y			Y	6.50049	7.61855	8.05225	9.36037	3.50019	5.25761	3.43101	4.63126	5.31203	5.80924	3.87338	5.00134	3.43209	3.9739
Solyc01g096880.2.1			Y	Y			Y		Y	Y	3.01472	3.43178	0.441219	0.347754	2.12133	2.30021	3.43101	2.12888	0.342712	0.345414	4.25127	3.25745	1.60164	1.36417
Solyc01g096930.2.1							Y		Y	Y	14.0373	17.4678	8.49347	7.88242	21.3193	17.5473	16.0633	18.413	9.25322	9.73441	17.5719	13.8853	17.8468	16.1032
Solyc01g096980.1.1				Y							2.8263	2.64247	1.32366	1.2751	1.37886	1.57728	1.40359	2.01684	0.856779	1.57007	2.26734	1.25034	1.25843	1.89798
Solyc01g097270.2.1			Y	Y		Y	Y	Y	Y		4.05103	4.94176	1.87518	1.21714	2.43953	3.48317	5.45842	2.98791	2.39898	2.3237	2.17287	3.6523	1.14403	0.978646
Solyc01g097430.2.1			Y	Y		Y	Y	Y		Y	0.47105	0.411814	0.772133	1.39101	0.530332	1.05152	0.779774	0.448186	2.82737	2.19809	0	0.559361	3.8897	4.27046
Solyc01g097510.2.1			Y	Y		Y	Y	Y	Y		3.10893	2.77974	7.61103	8.95466	2.54559	2.56309	1.87146	3.1373	12.4233	12.5919	4.62916	8.39041	6.92137	5.69394
Solyc01g097520.2.1				Y		Y	Y		Y		14.8852	16.1294	33.9739	42.7447	11.5612	15.7071	11.5407	13.2588	40.9541	45.1551	24.5629	31.2913	31.232	23.3392
Solyc01g097540.2.1							Y		Y	Y	2.92051	2.60815	4.6328	3.97019	1.2728	1.90589	1.87146	2.20358	2.91305	3.35994	2.0784	2.50067	2.86007	1.4828
Solyc01g097650.2.1				Y			Y		Y	Y	2.63788	2.84838	0.772133	0.695507	1.80313	2.43165	3.58696	2.87586	1.19949	0.847835	3.02312	2.69809	1.31563	2.2242
Solyc01g097710.1.1				Y					Y	Y	2.44946	3.36315	1.65457	1.04326	2.54559	3.68033	1.87146	2.12888	2.65602	1.97828	3.49549	2.23744	3.31768	2.40213
Solyc01g097770.2.1		Y	Y	Y	Y	Y	Y				23.5525	21.9291	9.48621	8.54894	8.59138	9.85803	20.742	19.4961	12.8517	12.8117	9.35279	14.7737	6.34936	8.9561
Solyc01g097930.2.1			Y							Y	2.44946	1.57862	2.4267	2.23142	1.16673	1.24868	1.40359	1.83009	3.59847	2.19809	2.92865	2.86261	0.915223	0.889678
Solyc01g098190.2.1				Y			Y		Y	Y	85.4485	76.7689	36.8418	32.1962	75.9435	75.8411	89.5181	102.261	34.0141	28.7008	49.8815	52.5799	70.415	73.2799
Solyc01g098240.1.1										Y	55.4897	61.978	33.2017	34.8333	61.8367	65.4573	64.2534	63.0448	121.491	112.479	76.0504	72.5195	100.331	107.651
Solyc01g098400.2.1		Y	Y	Y	Y	Y	Y	Y		Y	2.8263	1.47567	10.8099	10.1428	7.53071	12.4868	3.1191	1.86744	15.165	14.8214	10.4865	10.6608	30.7744	27.3724
Solyc01g098410.2.1									Y	Y	6.40628	6.9322	3.52975	3.68039	6.25792	8.1493	5.45842	6.38665	2.22763	3.07733	4.62916	5.19877	8.1226	8.54091
Solyc01g098500.2.1			Y	Y		Y	Y	Y	Y		9.89206	10.6728	33.312	32.3701	8.16711	9.92375	8.57751	6.64809	78.3953	67.607	25.6965	25.4674	51.1381	49.7034
Solyc01g098590.2.1		Y	Y	Y		Y	Y	Y			4.80471	3.70632	0.882438	1.21714	1.37886	2.23449	2.49528	2.83851	0.599746	1.06764	1.0392	2.13873	0.686417	0.504151
Solyc01g098650.2.1			Y			Y					3.39156	3.15724	7.16981	4.78161	3.92446	4.66613	4.05482	3.43609	6.68288	4.99281	4.72363	4.47489	7.72219	6.93949
Solyc01g098720.2.1			Y							Y	1.50736	1.26976	0.992743	1.39101	0.636398	1.3144	1.24764	1.15781	0.257034	0.910638	2.64523	1.57937	0.686417	0.504151
Solyc01g098820.2.1						Y					2.73209	4.15246	4.30189	3.15876	2.86379	5.19189	2.33932	2.83851	5.99746	4.42758	2.7397	3.15874	7.15018	4.9822
Solyc01g098940.2.1						Y				Y	2.73209	3.87791	3.52975	4.75263	2.96986	3.48317	6.23819	3.66019	1.62788	2.3237	4.34574	4.70521	2.28806	1.77936
Solyc01g099030.2.1										Y	9.60943	9.74626	5.62554	4.89753	5.93972	7.09778	6.86201	6.16256	6.76856	5.65224	8.03017	6.64652	13.7283	11.3879
Solyc01g099210.2.1									Y		16.8636	17.5364	12.1335	11.1571	25.8802	29.837	17.155	20.9153	13.7085	13.3142	19.2724	20.4989	19.7917	20.9074
Solyc01g099290.2.1						Y					12.2473	15.443	19.6342	16.2285	12.6219	12.3554	12.4764	10.0095	17.0499	15.7007	20.6895	17.406	21.6221	21.8564
Solyc01g099340.2.1				Y			Y		Y	Y	2.16683	2.5052	0.22061	0.289795	1.2728	1.18296	1.7155	1.4566	0.514068	0.596625	1.51156	1.67808	1.77324	1.54211
Solyc01g099420.1.1			Y								0.75368	0.857945	1.21335	1.50693	1.9092	1.11724	0.779774	1.04577	1.5422	1.78987	1.13367	1.64518	2.05925	1.63108
Solyc01g099620.2.1			Y	Y		Y	Y	Y	Y	Y	0.47105	0.102953	3.97097	5.82487	0.424266	0.657202	0	0.186744	3.76983	4.23918	1.60603	0.954204	1.65884	2.25385
Solyc01g099820.2.1			Y	Y							0.18842	0.754992	1.65457	1.76775	0.530332	1.70872	1.09168	1.04577	1.02814	1.31886	1.13367	0.987107	1.60164	1.39383
Solyc01g099840.2.1							Y		Y	Y	42.0177	42.6914	32.8708	25.6468	63.3216	58.6224	68.932	69.3568	66.3147	51.0585	32.6875	42.7088	82.7705	62.1589
Solyc01g099910.2.1							Y		Y		18.4652	20.3848	28.6792	30.4284	10.8188	12.4868	14.0359	10.6071	20.6484	25.5921	6.61308	7.40331	16.3596	14.3535
Solyc01g099970.2.1			Y	Y		Y	Y		Y		37.1188	29.479	9.04499	7.96935	22.5921	20.6361	36.4934	37.8717	9.93864	8.63536	19.7448	14.675	13.6711	14.7687
Solyc01g099980.2.1		Y	Y	Y	Y	Y	Y	Y	Y		0.942101	0.857945	6.06676	6.3465	2.65166	1.90589	0.935729	0.672279	6.93991	6.24886	2.64523	2.53358	5.77734	4.15183
Solyc01g100120.2.1				Y	Y		Y				3.86261	4.80449	2.2061	1.76775	2.33346	2.43165	4.8346	4.78065	1.79924	1.38166	2.36181	3.98133	3.31768	2.2242
Solyc01g100230.2.1				Y			Y		Y	Y	10.2689	12.0456	4.08128	3.33264	15.2736	15.51	16.2193	18.0768	4.19822	3.51695	5.19599	4.93554	16.2452	13.4935
Solyc01g100370.2.1		Y	Y	Y		Y	Y	Y	Y	Y	8.94996	6.24584	99.2743	93.0241	19.7284	14.2613	9.35729	8.25409	61.7738	65.8485	29.381	24.5461	35.4077	36.1209
Solyc01g100620.1.1				Y			Y		Y		2.16683	3.15724	7.39042	7.56364	3.50019	3.22029	2.18337	2.95056	5.74042	4.55319	6.32966	5.4949	4.1757	3.73665
Solyc01g100640.2.1									Y		1.03631	1.47567	1.32366	1.62285	0.636398	0.722922	1.09168	1.23251	0.942457	1.25605	1.13367	0.888397	0.972424	1.06761
Solyc01g100710.2.1				Y							3.20314	2.95133	6.50798	5.99875	6.04579	5.12617	7.32988	4.29512	7.3683	6.28026	4.15679	5.33038	5.54854	4.59667
Solyc01g100760.2.1	Y			Y							27.792	22.7527	11.2511	12.0844	11.8794	13.9984	15.9074	10.1962	13.7085	11.3359	14.5488	17.1428	15.1584	18.6239
Solyc01g100770.2.1				Y			Y		Y		9.23259	5.9713	1.76488	2.57917	7.00038	4.60041	6.70606	3.88428	3.08441	2.2923	2.7397	4.14585	3.08888	4.30011
Solyc01g100940.2.1										Y	3.7684	2.40225	1.54427	1.44897	2.01526	1.90589	3.27505	2.72646	1.45653	1.03624	1.79498	2.82971	3.26048	3.67734
Solyc01g100960.2.1									Y		2.35525	2.67679	3.19884	2.83999	0.742465	1.84017	2.33932	2.95056	2.57034	1.94688	1.13367	2.20454	1.37283	2.37248
Solyc01g102340.2.1		Y	Y	Y	Y	Y	Y			Y	3.86261	2.91701	0.22061	0.0869384	0.424266	0.460041	3.43101	1.97949	0.0856779	0.188408	1.22814	0.46065	0.40041	0.593119
Solyc01g102400.2.1						Y		Y			1.69578	1.44135	1.32366	2.08652	1.48493	0.920083	1.09168	1.00842	2.22763	1.35026	0.566835	1.08582	2.40246	2.81732
Solyc01g102410.2.1				Y		Y	Y		Y		148.663	141.561	410.003	441.328	181.586	202.615	125.232	142.523	307.412	346.765	212.469	206.602	272.736	295.403
Solyc01g102450.2.1				Y							1.22473	1.09817	1.76488	2.69509	1.06066	1.44584	0.935729	1.7554	1.37085	0.72223	0.850253	2.17164	1.48724	1.12693
Solyc01g102470.2.1				Y			Y		Y	Y	31.6546	32.396	104.128	101.196	39.4567	33.2544	43.3554	49.0017	22.7047	22.7345	36.7498	33.0352	28.3719	24.7924
Solyc01g102610.2.1			Y	Y							6.40628	6.28016	15.4427	13.3306	9.43991	8.4779	6.70606	9.59865	20.0486	16.0775	11.4312	9.04848	15.1584	14.8576
Solyc01g102680.2.1									Y		1.22473	1.47567	2.2061	1.2751	0.318199	0.788642	0.779774	0.933721	0.599746	1.19325	1.70051	1.57937	1.25843	1.15658
Solyc01g102710.2.1				Y		Y	Y		Y		3.01472	5.69676	0.992743	1.94162	4.45479	5.25761	7.17392	6.4987	4.19822	3.86236	4.15679	8.2259	2.68847	3.05456
Solyc01g102870.1.1										Y	1.13052	1.13249	0.882438	0.637548	1.06066	1.38012	0.935729	1.34456	1.11381	0.910638	1.98392	1.64518	1.54444	1.36417
Solyc01g102960.2.1				Y			Y		Y	Y	7.91364	6.45175	0.992743	0.347754	6.78825	5.45478	6.70606	7.05893	1.11381	0.408217	0.944726	0.329036	9.66704	8.68919
Solyc01g102980.2.1									Y		54.1708	47.8733	20.627	30.0807	50.4876	53.1676	49.5936	53.3715	17.9924	15.0098	58.1006	70.5782	37.7529	52.1352
Solyc01g103300.1.1						Y				Y	1.31894	1.13249	0.661829	0.898364	1.2728	0.985803	0.467864	0.933721	1.62788	1.00484	1.22814	1.02001	1.71604	2.52076
Solyc01g103530.2.1		Y	Y	Y		Y	Y		Y	Y	19.2189	14.6194	2.4267	2.78203	6.47005	8.93794	13.5681	11.5408	6.68288	7.75612	9.25831	13.9511	4.74772	5.87188
Solyc01g103650.2.1							Y				2.26104	1.30408	2.64731	2.4053	2.12133	1.84017	1.24764	1.12047	1.79924	2.4807	3.02312	2.40196	2.05925	1.86832
Solyc01g103780.2.1				Y			Y				68.3965	53.6387	32.9811	26.6321	56.9577	47.7129	62.3819	57.069	38.9835	39.126	41.379	42.6101	46.5048	48.2799
Solyc01g104010.2.1				Y					Y	Y	6.12365	6.21152	2.09579	2.86897	4.13659	6.57202	6.23819	4.48186	5.65474	5.93485	6.23519	8.19299	6.57816	7.59192
Solyc01g104020.2.1				Y							14.3199	12.8349	6.72859	6.31752	14.0008	10.2523	11.5407	10.4577	9.3389	7.88173	13.3206	10.6937	8.1226	7.76986
Solyc01g104030.2.1			Y	Y		Y	Y		Y	Y	6.97154	6.9322	1.21335	0.927343	4.24266	4.00893	4.52269	5.41558	2.74169	2.00968	4.06232	5.00134	2.40246	2.19454
Solyc01g104400.2.1			Y	Y			Y		Y		98.1669	87.2016	37.9448	32.3701	77.9588	66.5088	82.0322	73.5399	50.0359	48.4208	60.5569	56.2322	42.8439	46.0853
Solyc01g104620.2.1							Y				1.03631	1.68157	0.661829	1.01428	1.37886	1.70872	2.02741	1.94214	1.11381	0.659428	1.13367	1.8097	1.14403	1.15658
Solyc01g104710.2.1		Y	Y	Y		Y	Y	Y			7.81943	5.73107	1.54427	2.05754	3.71232	2.43165	7.9537	4.55656	2.14195	2.13529	3.96785	4.31037	0.858021	1.72005
Solyc01g104720.2.1		Y	Y	Y	Y	Y	Y	Y			4.23945	3.05429	0.772133	0.956323	1.37886	1.57728	3.74292	2.95056	1.02814	0.690829	1.22814	1.77679	0.743619	0.622775
Solyc01g104740.2.1		Y	Y	Y			Y		Y	Y	8.00785	8.099	5.07402	1.9706	19.198	18.3359	15.1276	13.7444	5.48339	2.85752	4.06232	1.71099	22.0798	18.6832
Solyc01g104770.2.1						Y		Y		Y	0.942101	1.16681	0.992743	1.94162	1.16673	2.36593	1.55955	1.49395	2.14195	3.07733	1.79498	2.63229	0.572014	0.682087
Solyc01g104880.2.1				Y			Y	Y	Y		4.23945	4.427	11.1408	9.07057	2.12133	2.89169	3.89887	3.24935	7.88237	9.5146	4.91257	3.91553	6.29216	5.93119
Solyc01g104910.2.1							Y		Y		129.35	136.207	81.8461	76.0421	166.949	156.02	160.166	178.453	85.3352	81.1724	89.6545	97.8223	132.936	130.901
Solyc01g104930.1.1				Y			Y		Y	Y	1.69578	4.08382	6.8389	9.70812	2.22739	3.08885	1.7155	2.31563	1.88491	1.78987	1.41709	1.77679	3.8325	2.4911
Solyc01g104950.2.1				Y			Y		Y		110.979	100.963	238.148	255.976	103.415	142.087	105.114	108.05	190.034	196.761	126.31	146.98	164.397	154.419
Solyc01g105000.2.1				Y			Y		Y	Y	1.69578	2.05907	4.6328	4.08611	1.48493	1.77444	2.96314	1.26986	1.88491	1.35026	2.92865	2.89552	1.88765	1.60142
Solyc01g105030.2.1				Y			Y				216.872	185.282	90.5602	87.6339	160.797	145.11	194.944	199.443	80.7086	83.2763	119.886	112.991	105.365	101.275
Solyc01g105050.2.1			Y	Y		Y	Y				161.382	138.095	54.6009	53.3802	103.627	101.801	151.588	122.243	34.0141	39.6913	87.3871	94.4991	60.1759	69.8694
Solyc01g105180.2.1							Y				1.13052	0.78931	1.76488	1.41999	0.636398	0.985803	0.935729	0.522884	1.45653	1.31886	0.850253	0.954204	0.972424	1.39383
Solyc01g105280.2.1										Y	17.2404	18.6346	26.1422	23.5603	16.3342	14.0641	16.8431	14.6034	15.165	12.2779	19.1779	18.9196	10.9827	11.3582
Solyc01g105360.2.1									Y	Y	4.14524	5.55949	7.83164	8.17221	3.71232	2.62881	4.67864	4.40716	2.48466	3.45414	2.83418	3.6523	4.1185	2.84697
Solyc01g105450.2.1		Y	Y	Y	Y	Y	Y				7.91364	9.54035	57.1379	54.8871	27.6833	33.123	13.88	14.6407	96.7304	82.6168	55.9278	54.258	48.7928	47.7164
Solyc01g105680.2.1		Y		Y			Y	Y	Y	Y	12.7184	10.4326	1.54427	1.30408	4.98512	5.98054	6.23819	6.01316	4.96932	3.73676	3.58996	2.66519	12.4127	10.0534
Solyc01g105720.2.1			Y	Y		Y	Y				40.2277	43.3434	16.5457	14.3738	18.8798	24.2507	43.8233	38.656	9.08186	8.60396	12.2814	14.8395	18.5905	18.6832
Solyc01g105770.2.1							Y				0.942101	1.5443	1.54427	0.782446	1.9092	1.70872	2.80719	1.94214	0.685424	1.19325	2.55076	2.66519	1.43004	1.83867
Solyc01g105800.2.1		Y		Y			Y		Y	Y	3.48577	4.32404	0.441219	0.898364	9.43991	8.74078	7.32988	5.56498	2.65602	2.10389	13.5096	15.7937	6.29216	7.14708
Solyc01g106060.2.1			Y	Y		Y	Y	Y	Y		21.6683	22.4095	80.5225	71.7821	30.7593	29.0483	26.6683	26.0695	59.8032	53.602	26.8302	34.6475	60.0043	60.6168
Solyc01g106800.2.1				Y			Y		Y		3.67419	2.8827	6.8389	6.20161	2.43953	3.74605	3.58696	2.65177	10.7097	9.20058	1.98392	2.69809	6.63537	5.21945
Solyc01g106820.2.1				Y			Y		Y	Y	25.1541	25.9786	7.28011	6.92609	22.8043	29.0483	28.2278	29.767	12.9374	10.9277	12.0925	12.9969	27.3423	22.4496
Solyc01g106910.2.1				Y		Y	Y	Y	Y		0.847891	1.50998	2.97823	4.11508	0.742465	1.11724	0.935729	0.485535	3.08441	3.01453	1.60603	2.40196	1.94485	2.66904
Solyc01g107070.2.1							Y		Y	Y	2.63788	3.39746	2.4267	1.62285	3.60626	4.00893	5.14651	5.11679	1.88491	1.53866	3.02312	3.12584	4.1757	4.21114
Solyc01g107180.2.1										Y	260.962	292.731	159.501	157.069	290.834	310.134	303.176	294.047	155.248	143.881	275.954	282.872	314.036	336.803
Solyc01g107370.2.1		Y									3.39156	3.0886	1.10305	2.49223	1.48493	1.44584	2.80719	1.71805	2.82737	2.19809	1.22814	1.54647	2.17365	2.19454
Solyc01g107390.2.1				Y			Y		Y	Y	2.07262	1.64725	6.39768	8.23017	1.69706	1.90589	2.02741	1.71805	3.85551	3.98797	2.26734	1.97421	1.88765	2.43179
Solyc01g107460.2.1			Y			Y		Y		Y	1.97841	2.23066	1.98549	1.21714	1.48493	2.49737	3.1191	2.12888	0.42839	0.879237	0.944726	0.230325	0.686417	0.711743
Solyc01g107490.1.1			Y	Y			Y				13.0952	12.0456	37.6139	30.8631	17.7131	17.153	14.3478	15.2757	39.6689	46.4425	18.3277	15.1686	27.6855	26.0972
Solyc01g107650.2.1			Y	Y		Y	Y		Y		27.0383	20.0759	62.4325	54.9451	30.335	25.828	25.7325	22.8201	78.3953	82.3028	31.0815	36.4901	50.3945	51.4531
Solyc01g107760.2.1							Y				1.8842	1.85316	1.54427	1.21714	2.43953	2.69453	2.65123	2.83851	1.88491	1.57007	1.70051	2.46777	1.54444	2.07592
Solyc01g107800.2.1										Y	35.5172	30.3713	24.7083	18.0832	46.0328	32.4	35.0898	30.4393	26.2175	24.8698	42.2292	35.4701	50.6805	55.0414
Solyc01g107890.2.1		Y	Y	Y		Y	Y		Y		71.1286	66.8511	13.1263	10.2008	29.3804	30.3627	58.1711	60.9533	8.91051	9.01218	36.4664	40.0766	20.2493	21.9157
Solyc01g107910.2.1			Y	Y		Y	Y	Y	Y		0	0.343178	2.2061	1.79673	0.530332	0.394321	0.31191	0.298791	1.97059	1.57007	0.37789	0.197421	2.11645	2.60972
Solyc01g107980.2.1				Y					Y		3.95682	4.59859	10.6996	9.27343	5.40939	3.41745	5.92628	4.59391	9.3389	9.86001	5.76283	3.06003	8.29421	5.63463
Solyc01g107990.2.1								Y			1.97841	1.85316	1.54427	1.73877	1.37886	0.985803	0.935729	1.34456	4.62661	3.04593	1.88945	1.71099	2.57406	2.37248
Solyc01g108020.2.1				Y			Y				12.4357	14.3105	29.3411	27.8493	18.0313	16.2986	13.724	13.0347	26.4745	26.3457	19.2724	16.7479	24.0818	19.7212
Solyc01g108100.2.1			Y	Y		Y					0.28263	0.583403	0.992743	1.56489	0.954598	1.05152	0.467864	0.933721	0.942457	1.60147	0.755781	1.77679	1.60164	2.40213
Solyc01g108120.2.1				Y							2.92051	3.53473	9.2656	6.08569	4.98512	4.53469	4.21078	4.29512	6.5972	6.06045	4.62916	6.74523	4.86212	5.48635
Solyc01g108170.2.1		Y	Y	Y		Y	Y		Y		8.3847	7.48128	1.32366	1.1302	1.80313	2.95741	4.21078	5.11679	2.82737	3.04593	8.9749	8.81816	1.48724	2.0166
Solyc01g108210.2.1				Y		Y	Y		Y	Y	14.6026	11.9083	1.54427	1.56489	13.6826	18.5988	20.742	16.5082	2.65602	1.94688	10.6754	9.24591	5.89175	10.2313
Solyc01g108300.2.1				Y			Y				9.04417	8.75104	17.6488	21.5897	12.4098	12.8154	9.20133	7.46977	20.8197	20.6935	16.6272	16.5834	16.1308	15.8066
Solyc01g108320.2.1		Y	Y	Y	Y	Y	Y		Y	Y	0.37684	0.30886	6.39768	6.81018	1.2728	1.84017	0.31191	0.522884	3.34144	4.27058	2.83418	4.54069	1.88765	1.95729
Solyc01g108330.2.1		Y									13.5662	9.84921	25.0392	15.3012	27.7894	21.6219	16.6872	14.0432	21.5052	16.1717	28.4362	18.426	17.6752	13.6714
Solyc01g108490.2.1				Y							3.39156	4.97608	1.32366	2.08652	2.12133	2.62881	3.89887	3.212	4.11254	3.23434	3.02312	2.56648	3.37488	3.08422
Solyc01g108500.2.1							Y				455.506	483.572	272.232	286.085	466.692	428.758	616.177	584.883	298.245	284.904	458.003	464.993	352.933	330.634
Solyc01g108520.1.1							Y		Y		1.31894	1.30408	0.772133	0.608569	1.48493	1.44584	1.09168	2.12888	0.514068	0.628026	1.51156	1.97421	0.972424	1.39383
Solyc01g108530.2.1			Y	Y							5.93523	5.42221	1.87518	2.02856	3.60626	2.69453	3.43101	2.61442	2.99873	2.60631	3.7789	4.08004	1.14403	1.89798
Solyc01g108630.2.1		Y	Y	Y	Y	Y	Y	Y	Y		5.74681	7.27538	0.441219	0.608569	2.01526	1.38012	5.61437	3.54814	0.257034	0.47102	0.944726	0.855493	0.972424	0.266904
Solyc01g108910.2.1				Y					Y		1.78999	2.1277	4.19158	6.31752	2.43953	1.97161	3.74292	2.76381	5.31203	5.05561	3.40101	6.31749	3.37488	2.81732
Solyc01g108940.1.1				Y			Y			Y	0.75368	0.514767	3.08853	2.02856	1.37886	1.05152	0.31191	0.410837	1.37085	0.973441	2.0784	1.74389	0.629216	1.18624
Solyc01g109150.2.1	Y		Y	Y	Y	Y	Y	Y		Y	3.20314	2.71111	7.94194	5.94079	2.96986	4.27181	1.09168	1.30721	18.5921	19.3746	7.65228	8.12718	15.6732	14.9763
Solyc01g109270.2.1		Y	Y	Y			Y		Y	Y	4.80471	5.25063	1.10305	0.492651	1.80313	2.49737	1.7155	3.24935	1.02814	1.06764	1.88945	2.00712	1.37283	1.77936
Solyc01g109380.2.1							Y		Y		8.94996	9.0599	16.1045	18.1991	8.16711	7.36066	7.48583	8.29144	15.6791	16.2345	13.4151	15.8266	12.1267	15.3321
Solyc01g109390.2.1		Y	Y	Y							19.8783	15.1342	50.4093	49.0333	38.6082	34.5031	28.0719	26.1815	28.1024	23.2998	34.577	42.4785	33.6344	38.3748
Solyc01g109440.2.1				Y			Y				0.942101	2.36793	0.882438	0.840405	1.37886	1.57728	2.02741	1.71805	1.71356	1.25605	0.661308	1.38195	1.48724	1.12693
Solyc01g109500.2.1	Y						Y				5.08734	4.70154	4.08128	4.231	1.48493	3.41745	2.02741	1.83009	7.62534	6.37447	1.51156	1.54647	3.20328	2.78766
Solyc01g109610.2.1		Y	Y	Y			Y		Y	Y	0.75368	0.926581	2.86792	2.92693	0.106066	0.197161	1.09168	0.410837	1.79924	1.75847	0.283418	0.954204	0.40041	0.326215
Solyc01g109670.2.1		Y	Y	Y			Y		Y	Y	3.39156	1.5443	0.22061	0.260815	0.530332	1.05152	1.87146	1.38191	0.514068	0.25121	1.98392	1.38195	0.686417	1.15658
Solyc01g109680.2.1									Y		1.97841	2.60815	4.30189	3.01386	1.16673	1.97161	2.49528	1.56865	2.05627	2.2923	1.79498	1.67808	3.14608	3.05456
Solyc01g109700.2.1		Y	Y	Y			Y				15.1678	15.7176	5.40493	6.57834	8.37925	5.71766	10.6049	13.4456	3.34144	3.17153	11.0533	13.3589	7.37898	7.17674
Solyc01g109880.2.1			Y			Y		Y		Y	15.5447	14.3792	11.9129	12.8379	14.2129	14.7213	10.9168	10.0842	30.1586	24.7442	6.32966	8.94977	38.611	40.5693
Solyc01g110150.2.1				Y			Y				5.93523	5.52517	2.86792	2.1155	3.71232	4.86329	5.14651	5.11679	2.3133	1.60147	5.66835	5.33038	3.14608	3.58837
Solyc01g110200.1.1			Y	Y							4.52208	3.53473	1.76488	1.10122	3.60626	1.70872	0.779774	2.91321	0.685424	0.533822	1.88945	1.25034	1.48724	1.36417
Solyc01g110350.2.1				Y			Y		Y		8.29049	8.71672	17.9797	19.764	7.95498	8.08358	9.98111	7.80591	12.9374	13.0315	9.91962	9.73946	12.2411	12.5445
Solyc01g110360.2.1			Y	Y		Y	Y				80.0785	83.3236	27.7968	32.428	52.5029	43.1782	75.0143	65.9954	17.0499	19.4374	34.4825	37.1152	27.6855	28.2325
Solyc01g110570.2.1				Y			Y		Y		6.31207	4.427	11.1408	12.693	6.04579	5.98054	6.5501	3.51079	10.9668	10.0798	8.21911	7.89686	8.29421	8.4816
Solyc01g110590.2.1							Y		Y	Y	2.44946	1.13249	2.64731	3.70937	1.37886	0.788642	1.7155	0.97107	1.5422	1.31886	1.70051	1.34905	0.858021	1.69039
Solyc01g111280.2.1				Y		Y	Y	Y	Y		2.63788	3.63769	0.992743	1.68081	4.56086	5.06045	4.36673	4.14572	3.42712	2.4807	2.92865	3.12584	1.77324	2.0166
Solyc01g111340.2.1			Y	Y		Y	Y	Y	Y	Y	0.75368	0.446132	3.52975	4.81059	0	0.328601	0.31191	0.373488	1.88491	2.85752	1.22814	1.11872	0.915223	1.51245
Solyc01g111380.2.1		Y									1.69578	1.57862	1.10305	0.840405	0.954598	0.591482	1.09168	0.597581	0.171356	1.35026	0.566835	0.592264	1.25843	1.15658
Solyc01g111570.2.1		Y	Y	Y			Y		Y	Y	6.40628	5.25063	0.882438	0.695507	1.16673	2.76025	3.27505	3.09995	2.14195	0.753631	1.41709	1.8097	1.83045	2.07592
Solyc01g111600.2.1			Y	Y		Y	Y	Y	Y		137.076	132.707	39.9303	47.4104	108.4	96.0172	136.928	134.605	25.532	30.2709	101.275	111.148	50.9093	48.6951
Solyc01g111640.2.1				Y			Y		Y	Y	16.581	15.1342	4.6328	4.57876	12.834	12.0925	14.1919	11.5408	4.45525	3.67395	7.55781	7.17298	8.80902	9.87543
Solyc01g111880.2.1	Y		Y	Y		Y	Y	Y	Y	Y	2.92051	2.84838	14.6705	15.4461	2.12133	2.30021	1.87146	0.933721	17.1356	14.947	2.26734	2.36906	5.49134	6.40569
Solyc01g111950.2.1				Y							8.3847	7.8931	3.19884	2.81101	2.86379	5.06045	3.74292	4.48186	2.48466	2.4493	3.68443	4.70521	4.91932	3.9739
Solyc01g112000.2.1				Y							1.22473	1.16681	1.87518	2.81101	0.954598	1.57728	1.87146	1.64335	4.54093	3.61115	1.88945	1.44776	1.71604	1.4828
Solyc01g112010.2.1				Y			Y		Y		5.27576	5.55949	1.76488	2.17346	5.09119	3.87749	6.23819	5.00474	3.25576	2.95172	5.66835	5.19877	4.0613	3.79596
Solyc01g112190.2.1				Y			Y				8.19627	8.4765	3.64006	3.15876	4.87905	5.65194	7.9537	9.52395	4.11254	3.17153	4.62916	4.93554	4.51891	6.25741
Solyc01g112230.2.1		Y	Y		Y	Y			Y	Y	0.56526	0.205907	1.10305	0.579589	2.33346	1.643	0.155955	0.448186	0.856779	0.690829	0.37789	0.592264	2.63127	2.2242
Solyc01g112260.2.1			Y	Y							15.5447	10.7758	7.16981	5.94079	7.63678	6.90062	13.724	8.66493	7.11127	5.68364	8.21911	8.94977	4.97652	6.31672
Solyc02g005100.2.1				Y			Y		Y	Y	1.78999	1.99043	0.441219	0.666528	1.2728	2.23449	1.7155	1.7554	0.0856779	0.565224	1.0392	0.888397	1.43004	1.30486
Solyc02g010680.1.1							Y				1.8842	1.13249	0.882438	0.985302	1.69706	1.3144	2.80719	1.606	2.05627	1.13045	1.41709	1.28324	1.71604	1.7497
Solyc02g014030.1.1			Y	Y							8.29049	13.0065	3.64006	5.62202	6.47005	6.8349	7.01797	9.4866	2.14195	2.60631	11.998	11.1543	4.34731	4.83392
Solyc02g014120.1.1							Y				2.16683	1.33839	1.10305	1.2751	2.43953	1.70872	3.1191	2.12888	1.62788	1.28745	1.51156	1.8097	1.83045	1.12693
Solyc02g014560.2.1			Y						Y	Y	3.20314	3.39746	2.64731	2.46325	6.57612	5.32333	3.74292	3.51079	4.02686	4.30198	3.7789	4.47489	5.60574	7.53261
Solyc02g014740.1.1			Y	Y		Y	Y				7.15996	5.35358	12.3541	15.533	10.0763	9.59515	4.67864	6.98423	19.1062	20.3166	8.31359	8.75235	18.0184	15.4211
Solyc02g014830.2.1				Y			Y		Y	Y	6.21786	7.20674	1.21335	1.47795	3.81839	5.12617	6.08224	5.60233	1.45653	1.16185	3.49549	4.31037	4.40451	3.14353
Solyc02g020920.1.1		Y	Y	Y	Y	Y	Y	Y	Y		3.01472	1.88748	27.7968	20.5175	11.5612	8.87222	2.80719	2.83851	37.3556	27.7588	4.15679	4.47489	26.7131	23.102
Solyc02g020940.2.1			Y	Y		Y					13.001	12.3201	5.18432	5.3612	7.53071	7.68926	10.449	10.4203	7.53966	7.91313	3.87338	5.56071	4.0041	4.12218
Solyc02g021250.1.1				Y			Y		Y	Y	5.6526	7.79014	3.08853	1.99958	12.3037	9.00366	9.82515	10.6444	5.055	3.73676	12.3759	9.80527	6.34936	6.40569
Solyc02g021350.2.1										Y	4.33366	5.3879	4.41219	4.11508	6.47005	8.01786	7.64179	5.97581	3.5128	3.67395	4.91257	4.80392	9.26663	8.45195
Solyc02g021490.1.1									Y		1.31894	1.95612	1.21335	0.869384	1.48493	2.69453	0.935729	1.94214	1.28517	1.28745	0.850253	1.57937	1.83045	1.60142
Solyc02g022850.1.1							Y		Y	Y	1.13052	1.37271	1.98549	2.49223	1.16673	0.591482	1.09168	0.672279	1.71356	2.54351	1.22814	3.15874	1.54444	0.800711
Solyc02g031710.2.1			Y	Y		Y	Y	Y	Y		3.01472	3.80928	15.6633	14.8375	4.56086	2.76025	3.1191	2.65177	14.6509	12.0895	2.0784	2.36906	9.43824	7.23605
Solyc02g031780.1.1		Y							Y	Y	3.20314	2.84838	3.19884	3.94121	1.48493	1.44584	2.18337	2.24093	1.79924	1.88408	3.02312	3.52068	1.08683	2.16488
Solyc02g032100.2.1				Y			Y		Y		1.78999	1.68157	0.551524	0.666528	1.37886	1.84017	2.02741	1.4566	0.342712	0.690829	1.79498	1.8755	1.08683	0.771055
Solyc02g032860.2.1			Y	Y		Y	Y		Y	Y	33.7272	37.3035	5.18432	3.91223	22.5921	18.9931	31.191	37.6103	7.88237	7.1595	11.998	11.1214	11.7835	13.701
Solyc02g032940.2.1		Y	Y								2.35525	1.68157	0.551524	1.2751	0.636398	0.722922	0.779774	0.859023	0.856779	0.72223	1.0392	0.756782	0.40041	1.12693
Solyc02g036310.2.1									Y		1.69578	1.57862	2.53701	2.17346	0.954598	1.18296	0.935729	1.97949	1.28517	1.57007	2.0784	1.64518	1.65884	1.80901
Solyc02g036350.2.1							Y		Y		34.9519	33.2883	19.6342	21.6477	49.4269	40.8122	46.1626	47.0969	12.5947	15.0412	55.6443	63.6355	23.1094	27.3428
Solyc02g038740.2.1				Y			Y				16.9578	16.3353	39.4891	42.0492	28.4258	20.7676	19.1824	18.8238	31.8722	34.667	20.1227	22.2428	27.9715	29.2704
Solyc02g055370.2.1				Y							77.4407	64.5861	29.672	33.0656	44.8661	39.3664	63.0057	41.8307	58.518	50.6503	72.8384	76.3034	46.9052	49.9999
Solyc02g062140.2.1			Y	Y		Y	Y				10.3631	11.771	3.08853	4.14406	8.37925	5.8491	6.86201	11.5408	5.22635	5.46383	6.32966	10.3646	4.34731	4.15183
Solyc02g062340.2.1			Y	Y		Y	Y	Y	Y	Y	50.3082	49.5549	4.41219	4.72365	33.9412	32.8601	50.2174	43.7728	5.99746	7.1281	21.6342	27.8364	12.8703	15.2728
Solyc02g062460.2.1			Y			Y		Y		Y	18.1825	16.2666	18.7518	20.3726	18.3495	17.2844	20.4301	15.313	25.7034	25.9375	31.3649	33.8907	43.7591	52.4021
Solyc02g062510.2.1				Y			Y		Y	Y	5.74681	6.24584	3.19884	1.70979	8.59138	7.29494	4.8346	8.29144	5.14068	4.96141	1.70051	2.07293	10.1819	10.943
Solyc02g062760.2.1		Y	Y		Y	Y			Y	Y	3.01472	3.84359	2.75762	3.33264	8.90958	11.1067	5.77033	3.02526	18.4208	24.3988	2.36181	4.34327	15.902	13.9086
Solyc02g063030.2.1		Y									5.55839	5.90266	2.53701	3.73835	2.12133	2.36593	4.36673	3.3614	5.22635	4.58459	4.06232	5.88974	3.26048	4.95254
Solyc02g063120.1.1							Y				2.26104	1.88748	1.98549	1.24612	1.2728	2.76025	4.21078	2.42767	1.11381	1.47586	1.98392	1.61228	1.88765	2.69869
Solyc02g063150.2.1			Y	Y		Y					86.2022	83.3923	33.7533	35.2101	44.0176	44.0982	77.1976	56.6208	27.7597	30.2709	30.0423	33.2984	22.5946	26.1565
Solyc02g063160.2.1				Y							9.89206	9.02558	4.08128	4.57876	6.36398	9.79231	7.9537	8.55288	5.055	5.55803	8.78595	7.53492	7.20738	7.11743
Solyc02g063270.2.1			Y			Y	Y				15.8273	13.8987	9.81712	8.08527	11.6673	11.1067	21.0539	15.8733	3.59847	5.27542	10.9588	11.4504	6.00615	7.85883
Solyc02g063290.2.1				Y			Y				6.02944	7.48128	2.97823	3.59345	6.68218	5.8491	7.32988	6.76014	4.36958	4.7102	7.46333	5.79103	7.09298	6.31672
Solyc02g063380.1.1				Y			Y		Y		6.21786	5.14767	2.4267	1.91265	7.00038	4.99473	8.10965	5.82642	1.79924	1.91548	6.70755	8.09428	3.26048	4.68564
Solyc02g063410.2.1										Y	2.73209	3.15724	3.86067	4.05713	2.22739	2.56309	1.55955	3.43609	2.14195	1.69567	3.58996	3.52068	1.71604	1.83867
Solyc02g063420.2.1			Y	Y			Y		Y	Y	3.86261	2.26498	0.882438	0.260815	2.01526	1.57728	1.09168	1.41926	1.37085	0.816434	0.283418	0.559361	1.83045	1.15658
Solyc02g063430.2.1			Y								37.3072	34.2149	67.3962	69.9854	55.897	48.8301	41.484	37.1247	58.4324	57.6528	68.4926	72.2563	70.6438	72.0343
Solyc02g063450.2.1				Y							168.919	201.96	511.042	481.784	297.516	249.277	293.195	372.069	477.483	502.358	345.675	382.142	250.485	278.054
Solyc02g064690.2.1				Y		Y	Y	Y	Y		3.48577	2.26498	0.992743	1.04326	3.81839	3.54889	5.14651	3.84693	0.856779	0.408217	3.21207	4.17875	1.48724	1.36417
Solyc02g064720.2.1			Y	Y		Y	Y		Y	Y	2.16683	2.47088	0.22061	0.144897	1.37886	1.11724	2.02741	2.27828	0.0856779	0.0942039	0.944726	0.789686	0.972424	0.889678
Solyc02g064800.2.1				Y			Y		Y	Y	37.684	35.6562	8.49347	9.36037	26.0923	28.9169	36.1815	33.9127	14.0512	13.9736	24.5629	30.8636	18.3617	22.0344
Solyc02g064940.1.1		Y	Y	Y			Y				32.8793	24.2284	6.72859	6.52038	12.6219	13.4069	21.8337	16.1347	4.79796	4.61599	14.3598	16.7479	10.2963	11.9513
Solyc02g064960.2.1			Y	Y		Y	Y	Y	Y	Y	110.414	111.739	0.882438	0.52163	69.5796	64.5372	101.683	100.543	0.856779	0.847835	69.9097	68.1433	19.4485	29.8042
Solyc02g064990.2.1				Y							12.3415	13.7614	5.51524	6.75222	7.31858	9.39799	11.2287	12.0263	7.3683	6.65708	13.6041	14.8066	7.66499	7.56227
Solyc02g065020.1.1	Y	Y	Y				Y		Y	Y	6.31207	5.3879	5.40493	7.09997	2.22739	2.49737	3.43101	2.57707	4.2839	4.52179	3.02312	2.96132	2.00205	2.34282
Solyc02g065160.1.1				Y			Y		Y	Y	1.97841	2.09339	5.95646	4.95549	2.22739	1.77444	2.02741	1.86744	1.45653	1.35026	2.7397	2.33615	1.71604	1.92764
Solyc02g065170.2.1				Y						Y	19.5957	25.3265	8.93469	10.5195	13.0462	17.0215	18.4027	12.9227	18.6778	16.3287	12.0925	14.2143	21.4505	21.7675
Solyc02g065240.2.1		Y		Y							4.89892	5.52517	2.97823	2.17346	2.01526	2.36593	3.58696	4.6686	2.91305	1.47586	3.87338	5.88974	2.97447	2.72835
Solyc02g065290.1.1				Y		Y	Y		Y	Y	8.29049	6.72629	16.9869	18.8946	8.16711	6.30914	11.2287	7.73121	2.39898	2.07249	14.3598	9.31171	3.66089	4.56702
Solyc02g065310.1.1				Y			Y		Y	Y	0.37684	0.857945	7.16981	5.5061	0.212133	0.460041	0.31191	0.859023	0.856779	0.628026	0.944726	0.394843	0.40041	0.326215
Solyc02g065340.1.1			Y	Y		Y	Y		Y	Y	8.94996	8.51082	20.8476	22.9228	6.78825	4.27181	7.01797	6.424	4.2839	2.63771	10.7699	10.4304	2.11645	3.2325
Solyc02g065400.2.1			Y								288.377	275.984	139.205	179.586	191.238	182.702	246.409	254.644	114.551	140.458	154.935	190.084	132.193	130.338
Solyc02g065430.1.1		Y	Y								5.55839	4.22109	1.87518	3.01386	2.12133	1.77444	3.43101	2.53972	2.14195	2.82612	2.7397	1.77679	1.71604	1.83867
Solyc02g065590.2.1				Y							1.03631	1.44135	3.19884	2.23142	1.37886	1.51156	2.02741	1.83009	2.22763	2.4493	1.88945	1.94131	1.54444	3.17319
Solyc02g066920.2.1			Y	Y		Y					3.48577	3.36315	1.32366	1.82571	1.591	2.03733	2.02741	2.80116	1.97059	0.785033	2.17287	2.27035	1.37283	1.06761
Solyc02g067040.2.1			Y			Y				Y	1.60157	3.05429	1.76488	2.72407	2.96986	3.68033	1.24764	2.31563	4.54093	4.55319	1.60603	2.7968	5.31973	6.64293
Solyc02g067050.2.1				Y			Y				12.4357	9.54035	5.29463	4.25998	6.68218	6.37486	8.88942	11.3167	5.055	6.12326	6.99097	5.69232	7.72219	6.07947
Solyc02g067150.2.1							Y			Y	0.847891	1.64725	0.772133	0.724487	0.636398	1.05152	2.49528	1.71805	1.02814	0.72223	0.944726	0.855493	1.88765	1.51245
Solyc02g067440.2.1		Y	Y	Y	Y	Y	Y	Y	Y	Y	7.06575	7.03515	147.367	156.721	25.2438	27.9311	9.20133	7.91795	77.6242	85.6628	48.5589	44.9463	61.6059	64.8279
Solyc02g067550.1.1		Y	Y		Y	Y			Y	Y	3.01472	3.15724	3.97097	2.92693	1.48493	0.920083	2.33932	2.91321	0.856779	0.973441	1.51156	1.74389	0.858021	0.800711
Solyc02g067580.2.1			Y	Y		Y	Y		Y		73.8607	66.3706	245.208	240.559	119.537	95.2285	78.4453	63.9039	195.089	198.079	122.153	121.25	187.621	182.206
Solyc02g067800.2.1			Y	Y			Y		Y	Y	2.63788	1.95612	0	0.0579589	1.16673	0.657202	2.80719	1.08312	0	0.0314013	0.850253	0.9213	0.629216	0.860023
Solyc02g068030.1.1				Y			Y		Y	Y	41.4524	41.1471	9.1553	9.15751	67.2461	43.2439	62.5379	67.2653	14.8223	9.07498	59.4233	54.7187	32.2616	39.6797
Solyc02g068070.2.1				Y			Y				34.2925	31.9842	85.2656	83.6637	45.3964	46.9899	43.6673	40.0753	111.895	112.542	55.2665	61.7271	54.799	57.7401
Solyc02g068300.2.1				Y			Y		Y	Y	11.7763	10.7072	4.85341	4.02815	10.2884	9.72659	10.293	10.4203	7.88237	7.75612	8.21911	10.2988	8.35141	8.98575
Solyc02g068350.1.1				Y			Y		Y		13.0952	13.0751	4.6328	4.69467	11.0309	11.6982	11.6966	12.2131	8.22508	10.1112	11.4312	10.6937	8.75182	8.27401
Solyc02g068380.2.1			Y			Y				Y	31.0893	36.0337	23.0537	25.2121	20.0466	20.5047	36.1815	32.0826	16.7929	15.4808	18.6111	23.9538	11.4975	12.2479
Solyc02g068410.1.1										Y	5.55839	5.93698	10.479	10.0559	5.72759	4.66613	4.21078	6.76014	5.48339	6.56287	3.21207	4.08004	3.60369	3.20284
Solyc02g068510.1.1		Y	Y			Y			Y	Y	9.04417	11.5308	10.6996	10.2587	4.77299	4.20609	7.17392	6.64809	0.856779	1.19325	6.04625	6.64652	2.17365	2.69869
Solyc02g068660.1.1							Y				2.07262	2.02475	0.551524	1.82571	1.2728	1.643	2.33932	3.212	2.22763	1.72707	1.22814	2.731	1.20123	1.95729
Solyc02g068860.1.1							Y				2.54367	4.0495	1.54427	2.46325	4.24266	3.22029	5.45842	4.22042	3.59847	2.54351	2.45629	3.22455	4.0041	3.26215
Solyc02g069290.2.1		Y	Y							Y	3.10893	2.77974	1.21335	2.08652	0.848531	0.788642	2.02741	1.19516	1.02814	0.753631	0.661308	0.82259	0.286007	0.94899
Solyc02g069390.1.1			Y	Y			Y		Y	Y	8.00785	9.12854	1.32366	1.79673	4.24266	5.19189	7.17392	6.61074	1.11381	1.72707	5.38494	5.92264	4.23291	3.9739
Solyc02g069420.2.1		Y	Y	Y	Y	Y	Y	Y	Y	Y	0.0942101	0	2.64731	2.46325	0.106066	0.460041	0	0	6.42585	5.08701	0.0944726	0	4.74772	5.45669
Solyc02g069430.2.1		Y	Y	Y	Y	Y	Y	Y	Y		0	0.0686356	1.65457	2.86897	0.106066	0.591482	0	0	6.25449	7.1281	0	0.0658072	4.97652	4.44839
Solyc02g069450.2.1		Y	Y	Y		Y	Y				10.5515	10.5013	2.4267	3.82529	4.13659	5.8491	8.2656	6.38665	3.5128	2.92032	4.44021	6.4491	3.31768	3.05456
Solyc02g069510.1.1			Y	Y		Y	Y				30.053	22.2723	14.7808	11.5918	26.9409	18.8617	31.8148	24.4261	4.62661	3.95657	36.3719	26.9151	14.186	11.032
Solyc02g069600.2.1			Y							Y	1.50736	1.30408	1.65457	1.33306	1.48493	0.985803	1.24764	0.933721	0.42839	0.72223	0.472363	0.855493	0.572014	0.682087
Solyc02g069800.1.1				Y			Y	Y	Y	Y	8.85575	7.10379	3.08853	1.94162	11.7734	9.46371	9.6692	8.29144	2.48466	3.04593	6.32966	7.56782	4.74772	5.10082
Solyc02g069810.1.1				Y			Y		Y	Y	21.3857	25.4981	7.39042	9.53425	20.5769	20.0447	28.5397	32.6802	5.055	4.30198	17.0051	14.3131	18.7049	17.7343
Solyc02g069910.1.1				Y			Y		Y	Y	8.76154	7.75583	29.0102	24.0819	10.5006	10.1209	9.20133	9.07577	18.4208	20.1282	12.7538	12.4046	12.3555	11.9513
Solyc02g069930.1.1			Y	Y							2.54367	3.29451	0.22061	1.36204	1.06066	2.23449	1.7155	1.6807	0.599746	0.847835	1.41709	1.48066	1.37283	0.800711
Solyc02g070430.2.1			Y	Y		Y	Y	Y	Y		0.847891	1.71589	3.19884	2.75305	0.742465	1.44584	1.09168	1.56865	17.4783	23.3626	14.4543	11.944	3.8325	4.41874
Solyc02g070530.2.1				Y			Y		Y	Y	7.44259	9.36876	24.267	28.5738	7.63678	9.66087	9.35729	7.39507	20.5627	17.5219	18.0443	23.8222	10.9827	10.3203
Solyc02g070690.1.1				Y			Y		Y	Y	6.31207	4.32404	3.19884	1.82571	9.43991	6.70346	5.45842	5.56498	2.05627	1.69567	5.00705	2.23744	5.94895	6.64293
Solyc02g070800.2.1			Y	Y			Y				9.23259	9.64331	4.41219	3.50652	4.03052	5.5205	7.9537	7.84326	2.22763	2.60631	5.66835	6.58072	4.86212	3.76631
Solyc02g070890.2.1			Y	Y		Y	Y		Y	Y	1.78999	2.19634	7.61103	10.1718	2.54559	1.84017	1.87146	2.09153	8.91051	10.4252	4.34574	4.08004	4.40451	4.09252
Solyc02g070940.1.1			Y	Y		Y	Y	Y	Y		468.601	316.582	67.5065	78.6503	253.287	211.29	388.483	288.072	86.3634	90.844	155.124	230.786	96.842	88.0782
Solyc02g070950.1.1			Y	Y		Y	Y	Y	Y		4.33366	2.57384	0.992743	1.21714	5.30332	3.28601	7.64179	3.3614	1.79924	1.57007	3.40101	2.82971	1.54444	1.60142
Solyc02g070970.1.1		Y	Y	Y		Y	Y	Y	Y		8.29049	7.34401	0.441219	1.70979	2.01526	3.08885	6.5501	4.10837	1.19949	2.07249	2.0784	3.38907	0.972424	1.39383
Solyc02g070980.1.1			Y	Y		Y	Y	Y	Y		7.63101	3.39746	0.772133	0.347754	2.65166	1.643	6.86201	1.79274	0.599746	0.502421	0.944726	2.69809	0.457611	0.415183
Solyc02g071000.1.1			Y	Y		Y	Y		Y		4.61629	2.19634	0.110305	0.608569	2.22739	1.11724	2.65123	2.50237	0.771102	0.596625	0.755781	1.77679	1.25843	0.0889678
Solyc02g071010.1.1		Y	Y	Y		Y	Y	Y	Y		28.9225	10.0208	1.76488	2.37632	9.22778	5.32333	19.0265	8.51553	2.14195	1.19325	3.58996	6.67943	1.88765	2.37248
Solyc02g071060.2.1		Y	Y	Y		Y	Y	Y	Y		0.18842	0.30886	2.86792	4.63672	0.848531	0.854362	0.623819	0.410837	6.25449	5.87205	0.566835	0.9213	5.31973	4.80426
Solyc02g071220.2.1			Y			Y		Y		Y	5.55839	4.18677	4.74311	3.91223	4.98512	5.45478	6.23819	5.00474	7.28263	5.05561	6.32966	5.29748	10.4679	11.6251
Solyc02g071580.2.1			Y								24.0236	21.7918	18.9724	22.1403	18.3495	21.0305	24.7968	19.6828	14.2225	15.9833	25.2242	28.4616	10.4107	11.6844
Solyc02g071620.2.1				Y			Y		Y		1.69578	1.85316	0.441219	0.579589	1.591	2.23449	1.87146	1.71805	0.514068	0.847835	1.51156	0.723879	1.14403	1.06761
Solyc02g071700.2.1			Y	Y	Y	Y	Y	Y	Y		1.8842	2.23066	10.9202	8.78078	2.75773	3.81177	1.09168	1.4566	6.93991	9.42039	3.87338	5.13296	7.55059	8.2147
Solyc02g071710.2.1	Y	Y	Y	Y		Y				Y	9.13838	8.23627	5.84615	3.07182	2.33346	3.02313	4.67864	3.32405	3.17008	2.70051	5.76283	3.78391	1.31563	1.54211
Solyc02g071720.2.1			Y	Y		Y	Y	Y	Y		2.16683	2.36793	5.73585	5.67998	2.22739	2.36593	1.7155	2.09153	7.28263	6.24886	4.25127	6.28458	6.34936	3.76631
Solyc02g071920.2.1				Y							5.55839	5.49085	2.2061	2.92693	5.09119	5.45478	5.14651	5.11679	2.99873	3.23434	4.06232	4.93554	3.14608	4.00355
Solyc02g072310.2.1			Y			Y		Y			11.211	11.7024	17.7591	17.6485	10.9248	14.327	10.293	10.383	35.0423	33.1284	13.1317	11.944	27.9143	27.1055
Solyc02g072320.1.1			Y			Y		Y			1.50736	1.23544	2.2061	1.36204	0.954598	0.985803	1.24764	0.859023	2.99873	2.4807	0.944726	0.82259	3.48929	2.78766
Solyc02g072330.1.1			Y			Y		Y		Y	2.8263	3.94655	5.29463	4.66569	4.77299	5.8491	4.67864	4.03367	11.7379	10.8649	4.25127	2.92842	14.186	10.4092
Solyc02g072440.2.1			Y	Y			Y		Y	Y	3.7684	3.98087	0.661829	0.869384	3.50019	3.28601	3.27505	2.76381	1.88491	0.533822	2.17287	2.69809	1.25843	2.28351
Solyc02g072520.2.1								Y			21.7625	24.0911	14.119	15.1563	30.9714	27.6025	23.5492	27.19	13.023	13.3456	24.7518	24.9738	15.2728	13.9383
Solyc02g075620.2.1		Y							Y		5.6526	5.07904	4.74311	4.86855	2.33346	2.36593	5.30246	3.77223	4.36958	2.4493	6.04625	4.40908	3.20328	3.70699
Solyc02g076930.1.1				Y			Y				3.7684	3.15724	10.148	9.18649	5.40939	4.46897	4.21078	3.54814	5.74042	6.75128	8.9749	5.69232	4.63332	5.18979
Solyc02g076940.1.1									Y		0.847891	1.20112	1.98549	1.65183	0.954598	0.657202	2.18337	0.97107	0.685424	0.942039	0.755781	1.34905	1.14403	1.30486
Solyc02g077050.2.1			Y	Y			Y		Y	Y	2.73209	3.12292	0.330914	0.434692	1.591	1.51156	1.24764	1.71805	0.342712	0.628026	0.850253	1.51356	1.08683	1.45314
Solyc02g077080.2.1				Y							30.6183	27.0768	13.2366	13.4755	21.2133	23.1992	26.0445	25.0237	15.422	13.9108	24.8463	24.6777	17.1032	18.7722
Solyc02g077110.2.1		Y	Y	Y			Y		Y	Y	3.48577	3.39746	0.441219	0.608569	1.37886	1.84017	3.1191	1.86744	0.514068	0.628026	0.661308	0.954204	1.08683	1.7497
Solyc02g077140.2.1				Y			Y		Y		3.39156	3.53473	0.772133	1.30408	2.54559	2.95741	1.87146	3.02526	1.11381	1.38166	1.70051	1.51356	2.40246	2.2242
Solyc02g077240.2.1		Y	Y	Y		Y	Y				12.8126	10.2953	40.9231	46.1643	27.0469	22.9363	11.6966	14.0058	36.6702	43.3966	36.5609	37.872	31.6896	41.1921
Solyc02g077250.2.1		Y	Y	Y			Y				2.92051	1.61294	0.22061	0.869384	0.742465	0.920083	2.33932	1.26986	0.514068	0.408217	0.755781	1.74389	0.743619	0.682087
Solyc02g077260.2.1				Y			Y		Y		1.69578	1.30408	0.661829	0.434692	1.2728	1.643	2.49528	1.19516	0.942457	0.376816	1.22814	1.48066	1.14403	1.03796
Solyc02g077330.2.1				Y			Y		Y		23.2699	28.8613	10.8099	9.82404	16.8646	23.8564	25.5766	18.6371	12.8517	11.6813	16.5327	19.3473	18.0184	18.7426
Solyc02g077390.1.1		Y	Y		Y	Y			Y	Y	3.20314	3.67201	4.5225	2.81101	25.7741	32.7287	4.21078	4.59391	93.1319	114.521	5.57388	12.2401	51.3097	57.8291
Solyc02g077670.2.1										Y	19.6899	20.3848	15.3324	11.6497	20.5769	25.4994	15.4395	20.2431	15.0793	12.6233	11.6201	10.595	27.7999	27.8173
Solyc02g077710.1.1										Y	26.6614	31.8126	33.8636	34.4566	19.7284	26.8796	24.017	22.4466	14.5653	17.2707	24.5629	27.7048	13.5567	17.7046
Solyc02g077780.2.1			Y			Y					23.5525	22.4782	33.0914	33.1815	26.5166	27.3396	19.9622	19.4961	49.3505	49.7083	24.8463	23.3615	50.7949	48.2502
Solyc02g077790.1.1		Y	Y	Y	Y	Y	Y	Y	Y		0	0	4.30189	5.15835	0.212133	0.394321	0	0	2.99873	3.10873	0.0944726	0	3.8325	3.55871
Solyc02g077840.1.1			Y								44.5614	28.4838	74.7866	41.7594	73.6101	57.0451	57.2354	42.2789	101.357	84.9719	55.5499	40.3727	86.603	62.5444
Solyc02g077880.2.1				Y							138.677	134.972	492.07	434.286	272.909	194.992	271.205	227.977	367.301	390.193	235.993	363.025	265.872	254.092
Solyc02g077920.2.1		Y	Y	Y			Y				3.01472	3.67201	13.3469	12.751	8.59138	9.20083	6.5501	4.07102	6.76856	6.02905	13.2262	12.5692	7.43619	6.70224
Solyc02g077930.1.1									Y		6.97154	4.83881	3.75036	3.94121	9.75811	7.68926	9.82515	5.86377	6.85424	3.48555	7.27439	6.21878	6.06335	4.86358
Solyc02g077960.1.1										Y	12.8126	12.0456	12.5747	9.5922	23.0164	17.2844	18.8705	15.6865	24.6752	25.4037	16.7216	18.4918	22.8806	26.1862
Solyc02g077970.2.1			Y			Y					8.47891	7.92741	13.016	10.5485	12.6219	10.7124	5.30246	7.28302	35.128	24.7442	2.0784	1.61228	22.9378	18.9798
Solyc02g078110.1.1			Y	Y		Y	Y	Y	Y	Y	0.0942101	0.137271	5.62554	7.15793	0.424266	0.394321	0.31191	0.0746977	3.59847	3.01453	0.944726	0.954204	1.94485	2.34282
Solyc02g078150.2.1			Y	Y		Y	Y	Y	Y	Y	1.8842	1.5443	16.7663	20.9232	1.06066	1.57728	2.33932	0.522884	21.3338	26.5027	3.30654	4.31037	4.23291	4.53736
Solyc02g078240.2.1				Y							4.80471	5.52517	1.76488	1.85469	3.07593	3.08885	3.58696	3.54814	1.79924	1.50726	3.40101	4.14585	2.28806	2.96559
Solyc02g078380.2.1									Y		22.3278	26.2188	21.9506	28.7476	13.1522	11.5668	18.7146	18.413	17.2213	19.4374	15.2101	18.8538	13.2707	14.9466
Solyc02g078400.2.1			Y						Y	Y	92.8911	105.87	149.242	143.622	54.7303	61.8427	81.0965	97.8913	87.1345	86.1338	26.8302	26.7177	52.7397	39.6203
Solyc02g078600.2.1				Y			Y		Y	Y	1.31894	2.77974	0.661829	0.492651	1.591	1.24868	2.33932	1.19516	0.771102	0.72223	0.755781	2.17164	2.00205	1.83867
Solyc02g078630.2.1				Y							11.4936	9.0599	5.07402	4.60774	8.90958	8.4779	8.88942	7.54446	5.31203	4.99281	9.44726	7.23879	8.40861	7.2064
Solyc02g078720.2.1				Y			Y		Y		24.683	23.0616	8.60377	8.66486	21.3193	15.0499	23.3932	22.0732	8.1394	9.6088	22.4845	27.0467	11.7835	12.4852
Solyc02g078750.2.1			Y	Y		Y	Y				3.95682	3.87791	1.32366	1.21714	2.33346	2.16877	3.27505	3.66019	0.685424	1.00484	1.0392	2.82971	0.915223	2.16488
Solyc02g078900.2.1							Y				26.6614	25.9099	18.6415	15.2432	28.2137	29.3112	32.5946	34.6597	17.9067	20.8191	24.2795	28.0009	24.4822	25.771
Solyc02g079010.2.1						Y	Y				2.07262	2.26498	3.64006	3.3906	1.591	2.76025	1.55955	1.5313	3.34144	3.57975	1.98392	1.94131	3.8897	3.79596
Solyc02g079140.1.1			Y	Y		Y	Y		Y	Y	11.4936	11.9426	1.32366	2.20244	11.243	9.33227	14.5038	15.9106	2.48466	1.78987	5.8573	7.50202	4.97652	6.22775
Solyc02g079190.2.1							Y		Y		51.2503	51.0992	96.5167	101.747	47.6238	40.4836	43.6673	45.7523	71.9695	75.8656	49.4092	43.5643	50.5089	55.1897
Solyc02g079220.2.1										Y	69.056	72.994	83.8316	76.0711	37.5475	49.8816	55.6759	51.3546	35.128	39.44	52.0544	59.9832	37.6957	37.6927
Solyc02g079510.2.1				Y							37.5898	36.9946	84.0522	79.4617	54.9424	47.2528	43.6673	41.6066	74.1114	62.52	54.7941	64.9517	61.0339	53.3807
Solyc02g079570.2.1				Y			Y		Y	Y	8.94996	7.96173	2.3164	2.92693	8.16711	9.59515	9.6692	9.41191	6.34017	7.50491	5.95177	8.39041	6.34936	8.89678
Solyc02g079580.2.1				Y			Y		Y	Y	2.63788	2.5052	0.992743	0.695507	2.22739	2.16877	2.49528	2.27828	1.28517	1.06764	2.36181	2.07293	2.91727	2.34282
Solyc02g079650.2.1				Y					Y		1.69578	1.75021	3.52975	3.47754	1.2728	1.84017	2.96314	1.83009	2.91305	1.72707	1.70051	2.731	3.03168	2.87663
Solyc02g079780.1.1										Y	1.41315	0.823627	0.661829	0.840405	1.06066	0.985803	1.55955	1.12047	1.11381	0.816434	1.32262	2.07293	1.88765	2.07592
Solyc02g079790.2.1				Y			Y		Y	Y	3.10893	2.95133	0.772133	0.52163	3.07593	3.22029	3.1191	2.80116	0	0.565224	3.96785	4.27747	2.91727	3.05456
Solyc02g080090.1.1		Y	Y	Y	Y	Y	Y			Y	0.0942101	0.30886	1.87518	1.62285	2.54559	3.54889	0.623819	0.33614	2.39898	1.31886	0.37789	0.855493	3.60369	4.59667
Solyc02g080110.2.1			Y	Y		Y	Y	Y	Y		1.31894	0.823627	5.62554	4.49182	1.591	1.84017	0.935729	1.30721	5.48339	3.48555	0.850253	1.05291	4.0041	4.89323
Solyc02g080120.1.1				Y			Y				15.7331	15.7519	7.83164	6.69426	11.5612	11.6982	14.1919	15.201	5.14068	4.36478	7.55781	7.40331	8.98062	10.1127
Solyc02g080210.2.1			Y	Y		Y	Y	Y	Y		0.47105	0.686356	11.6923	22.7779	1.06066	1.3144	0.623819	0.298791	30.587	19.0292	0.755781	2.10583	9.55264	8.30367
Solyc02g080220.2.1		Y	Y	Y	Y	Y	Y	Y	Y	Y	0.28263	0.549085	13.5675	16.895	2.01526	2.16877	0.623819	0.672279	23.2187	18.307	3.7789	5.4949	7.8366	6.90984
Solyc02g080230.2.1										Y	12.2473	15.5803	28.5689	28.0811	13.5765	15.1814	15.9074	15.4624	18.5921	14.7586	16.0603	19.7421	13.4423	14.5018
Solyc02g080290.2.1									Y		1.8842	1.75021	2.3164	2.2604	0.742465	1.18296	1.24764	1.19516	1.88491	1.53866	1.88945	2.04002	1.20123	1.45314
Solyc02g080480.2.1			Y	Y		Y	Y	Y	Y		0.0942101	0.137271	2.86792	3.1008	0.106066	0.788642	0.779774	0.149395	4.79796	2.85752	0.283418	0.954204	3.66089	2.4911
Solyc02g080510.1.1				Y							63.4034	57.2421	163.361	116.237	85.9138	76.6297	84.2156	61.8123	110.953	95.1774	115.068	109.404	107.767	76.9275
Solyc02g080520.2.1				Y							13.8489	10.7415	4.41219	5.24528	7.42465	9.66087	9.04538	9.5613	4.2839	3.39134	6.99097	9.47623	8.46581	8.03676
Solyc02g080530.2.1			Y			Y					245.982	224.541	123.1	135.653	219.451	195.123	216.777	245.905	115.237	112.762	210.674	279.911	103.077	126.216
Solyc02g080580.1.1				Y			Y		Y	Y	4.14524	4.52995	1.10305	2.49223	3.71232	5.38905	5.61437	5.49028	4.54093	4.23918	6.32966	7.50202	5.09093	5.87188
Solyc02g080640.2.1			Y	Y		Y	Y		Y	Y	92.9853	89.7754	17.4282	13.8812	50.0633	49.7502	65.1891	83.512	17.7353	19.3432	36.5609	25.6648	29.3443	33.8671
Solyc02g080790.2.1		Y	Y	Y		Y	Y	Y	Y		0	0	2.86792	2.1155	0	0.394321	0	0.0373488	4.62661	1.63287	0	0	3.08888	2.16488
Solyc02g081010.1.1				Y			Y		Y		22.422	25.6697	71.0363	78.4184	21.5315	31.2171	22.3015	24.7249	54.2341	58.4692	30.1368	32.6074	43.2443	45.3736
Solyc02g081120.2.1				Y			Y				147.062	143.277	376.36	385.079	209.905	215.365	163.285	198.472	335.172	311.407	268.397	256.121	248.197	230.634
Solyc02g081130.1.1				Y			Y				1.78999	2.1277	0.992743	0.782446	2.12133	1.3144	2.80719	2.16623	0.856779	0.753631	1.79498	2.10583	1.08683	1.42349
Solyc02g081190.2.1		Y		Y	Y		Y	Y			7.15996	7.34401	2.4267	2.23142	2.65166	1.38012	6.70606	4.44451	5.99746	6.18606	3.30654	5.36328	3.8325	4.5077
Solyc02g081220.1.1										Y	1.69578	1.5443	1.65457	1.24612	1.69706	2.43165	2.02741	1.606	2.48466	2.4493	2.0784	2.10583	3.31768	2.43179
Solyc02g081230.2.1			Y							Y	4.14524	3.70632	4.08128	3.94121	4.87905	7.22922	4.99055	4.48186	7.79669	6.46867	5.66835	5.26457	9.72424	8.36298
Solyc02g081270.2.1			Y	Y							45.8803	40.2891	95.4136	100.24	62.5792	74.9867	53.3365	49.7486	110.096	113.736	88.0484	88.5435	98.4437	99.1398
Solyc02g081340.2.1	Y	Y	Y	Y	Y	Y	Y		Y	Y	49.6487	54.7712	1.21335	1.15918	10.9248	13.2098	21.8337	26.1815	1.02814	1.50726	4.15679	9.04848	6.12055	7.4733
Solyc02g081360.2.1			Y	Y		Y		Y	Y	Y	0.47105	0.480449	0.22061	0.115918	0.848531	0.854362	0.31191	0.33614	2.99873	2.73191	0	0.0658072	4.57611	3.73665
Solyc02g081370.2.1		Y	Y	Y	Y	Y	Y	Y		Y	0.18842	0.0686356	2.2061	1.65183	1.9092	3.41745	0.155955	0.0373488	21.3338	16.4229	0.0944726	0.131614	16.188	14.9466
Solyc02g081390.2.1				Y			Y		Y	Y	22.6104	18.9434	4.96371	5.5061	16.7585	19.1246	22.4575	21.6623	4.11254	3.51695	14.8322	14.2143	14.8152	13.3748
Solyc02g081480.2.1				Y			Y		Y		4.7105	4.6329	2.53701	2.05754	4.34872	4.99473	4.21078	7.24567	1.5422	1.19325	5.00705	5.29748	3.54649	3.26215
Solyc02g081540.2.1										Y	1.13052	0.995217	2.2061	1.50693	1.48493	1.3144	1.7155	0.63493	1.71356	0.879237	1.79498	1.02001	0.858021	0.830367
Solyc02g081550.2.1		Y	Y	Y		Y	Y				2.8263	2.8827	1.10305	0.492651	0.530332	1.57728	2.65123	2.27828	0.42839	0.596625	0.472363	0.9213	0.972424	0.771055
Solyc02g081600.2.1										Y	4.05103	4.80449	2.97823	3.04284	4.34872	4.60041	6.5501	4.59391	4.2839	4.58459	5.95177	7.83105	6.17775	6.04981
Solyc02g081670.1.1			Y	Y		Y	Y	Y	Y	Y	0	0.274542	74.6763	76.8536	0	0.13144	0	0.298791	5.56907	5.68364	0.850253	0.0329036	1.02963	0.593119
Solyc02g081690.1.1			Y	Y		Y	Y	Y	Y		3.95682	4.0495	27.2453	24.1979	4.45479	3.68033	2.96314	2.83851	27.1599	26.6911	6.99097	5.75813	17.332	19.4543
Solyc02g081770.1.1		Y	Y	Y							3.29735	2.16202	0.882438	1.10122	0.636398	1.3144	1.24764	1.30721	1.19949	0.847835	1.13367	2.56648	0.686417	0.652431
Solyc02g081830.2.1			Y	Y		Y	Y		Y	Y	15.6389	16.1294	116.151	120.815	26.0923	23.5935	19.3384	14.1179	65.458	68.2665	35.8051	33.8249	43.0155	43.1791
Solyc02g082040.2.1			Y	Y		Y	Y	Y	Y	Y	2.16683	2.02475	0	0.0289795	2.01526	2.30021	2.02741	2.57707	0	0	1.51156	1.31614	0.286007	0.622775
Solyc02g082170.1.1			Y	Y			Y		Y	Y	2.35525	1.75021	6.06676	5.99875	1.2728	0.657202	1.24764	1.90479	0.42839	0.565224	4.34574	4.77102	0.343209	1.33452
Solyc02g082260.2.1			Y	Y			Y		Y		209.146	193.964	575.35	564.868	302.714	261.895	221.768	202.169	616.71	592.323	428.906	485.953	402.984	421.233
Solyc02g082310.1.1				Y			Y		Y	Y	5.08734	3.50042	2.09579	1.50693	3.07593	4.79757	3.74292	4.10837	2.39898	2.85752	4.25127	4.31037	3.37488	3.76631
Solyc02g082420.2.1			Y	Y			Y		Y		16.3925	12.4574	62.984	50.7141	24.1831	20.1761	18.7146	17.2552	43.9528	40.4763	26.1689	21.9138	32.2616	25.6524
Solyc02g082740.1.1				Y			Y		Y	Y	1.31894	1.75021	0	0.376733	0.848531	1.70872	0.935729	0.746977	0.942457	0.376816	2.0784	0.9213	1.37283	1.63108
Solyc02g082850.2.1			Y	Y			Y				3.95682	4.97608	1.87518	1.73877	3.50019	2.62881	4.8346	3.66019	1.88491	2.3237	1.79498	1.28324	1.48724	2.58007
Solyc02g082930.2.1			Y			Y				Y	2.73209	4.77018	2.4267	1.76775	0.954598	2.36593	5.92628	2.09153	2.74169	4.773	4.91257	8.16009	0.514813	0.860023
Solyc02g082940.2.1				Y							1.69578	2.77974	0.992743	1.01428	1.591	1.57728	1.24764	2.05419	1.88491	1.85268	3.30654	3.06003	1.94485	2.07592
Solyc02g083120.1.1										Y	1.13052	0.823627	0.551524	0.753466	1.06066	0.788642	0.935729	1.08312	2.14195	1.82128	1.13367	1.8755	1.48724	1.42349
Solyc02g083190.1.1			Y					Y			1.13052	0.857945	1.87518	1.76775	0.848531	1.24868	1.7155	1.12047	3.17008	2.4493	2.17287	2.20454	2.57406	2.4911
Solyc02g083250.2.1							Y		Y	Y	22.1394	23.1645	33.7533	47.2076	16.4403	14.5242	14.9717	16.2467	38.5551	52.4716	27.6805	28.7248	15.6732	16.9929
Solyc02g083280.2.1					Y	Y					10.8342	11.2906	10.479	12.664	5.62152	6.96634	16.9991	12.8853	11.8236	13.0001	6.42414	9.34462	6.52096	6.465
Solyc02g083520.2.1				Y			Y		Y	Y	82.8106	89.5009	32.9811	29.9938	116.567	110.673	108.389	108.461	34.0998	30.9931	124.137	130.167	64.8664	69.1577
Solyc02g083680.1.1			Y								6.12365	4.90745	3.97097	4.40488	2.86379	3.15457	3.27505	4.33246	2.22763	3.29714	4.25127	5.85684	2.28806	2.69869
Solyc02g083700.2.1		Y	Y	Y		Y					0.65947	0.549085	1.10305	1.88367	1.69706	1.38012	0.935729	0.896372	1.28517	1.06764	1.70051	1.71099	2.28806	1.86832
Solyc02g083720.2.1			Y	Y		Y	Y	Y	Y		3.10893	4.22109	13.2366	12.5481	4.66692	4.53469	1.55955	3.69753	13.3658	10.0798	5.38494	6.38329	12.2411	9.4899
Solyc02g083740.1.1		Y	Y						Y	Y	2.07262	1.47567	2.64731	1.24612	0.530332	0.722922	0.623819	0.97107	0.856779	0.628026	0.755781	0.493554	0.743619	0.830367
Solyc02g083860.2.1		Y									174.289	187.375	103.797	94.9078	78.0649	91.6139	119.149	114.773	99.2151	89.5565	51.6765	49.9147	100.675	102.817
Solyc02g083870.2.1		Y	Y				Y		Y	Y	0.28263	0.411814	0.330914	0.144897	2.54559	1.643	2.49528	0.746977	1.02814	0.785033	0	0.197421	0.572014	1.7497
Solyc02g083880.2.1			Y	Y		Y	Y	Y	Y		24.9657	22.9243	106.885	104.007	26.9409	26.9453	24.9528	16.8443	113.438	123.658	45.8192	34.9107	73.1034	55.7532
Solyc02g083950.2.1			Y	Y		Y	Y	Y	Y		6.78312	7.96173	19.193	18.4309	4.45479	4.92901	4.36673	5.82642	27.0742	24.022	6.70755	5.59361	18.0184	12.7224
Solyc02g084200.1.1								Y			3.48577	3.15724	3.19884	3.2457	1.48493	2.43165	3.74292	3.47344	3.34144	3.70535	4.06232	3.35617	4.46171	4.7153
Solyc02g084210.1.1		Y	Y	Y							4.14524	2.60815	0.882438	1.01428	1.06066	0.920083	1.7155	1.64335	1.5422	1.03624	1.88945	1.44776	0.972424	1.63108
Solyc02g084370.1.1				Y			Y		Y		176.644	169.564	82.3977	81.4033	195.162	178.627	157.826	178.752	103.67	108.554	184.033	181.036	136.94	146.56
Solyc02g084440.2.1			Y	Y		Y	Y				329.17	326.431	128.946	137.218	236.528	206.756	292.415	295.467	103.328	120.11	148.983	171.197	136.425	124.614
Solyc02g084540.2.1				Y			Y		Y	Y	20.8204	21.6202	5.84615	6.23059	21.6375	22.1477	27.1361	24.202	7.71102	8.57256	19.8392	19.808	18.1329	19.5136
Solyc02g084570.2.1			Y								3.7684	5.14767	7.94194	7.18691	6.25792	5.19189	4.99055	5.60233	10.367	8.63536	4.62916	5.16586	10.5251	9.87543
Solyc02g084630.2.1				Y			Y		Y	Y	12.7184	15.3401	32.3193	31.3558	12.728	14.0641	12.1645	14.4167	16.3645	15.4808	15.2101	15.3331	14.8724	15.599
Solyc02g084680.2.1				Y			Y		Y		21.5741	20.8652	58.7924	50.7431	22.9103	25.828	27.9159	21.1768	83.3646	73.6361	30.4202	22.539	38.5538	31.8208
Solyc02g084740.2.1				Y		Y	Y	Y	Y		8.85575	7.17242	21.1785	22.6909	7.42465	5.65194	7.64179	5.19149	17.3926	17.7731	7.27439	8.35751	14.1288	15.6583
Solyc02g084780.2.1			Y	Y		Y	Y	Y	Y		0.847891	0.274542	4.08128	3.50652	0.318199	0.920083	0.467864	0.261442	4.19822	4.14497	0.0944726	0.164518	5.31973	3.82562
Solyc02g084790.2.1		Y	Y	Y	Y	Y	Y	Y	Y		2.16683	1.33839	16.3251	15.9387	5.72759	6.30914	3.58696	2.27828	23.9898	20.0968	4.25127	3.6523	17.5036	15.0059
Solyc02g084840.2.1			Y	Y		Y	Y		Y	Y	0.18842	0.892263	8.38316	10.1718	0.954598	0.328601	0.935729	1.34456	0.342712	0.345414	1.32262	0.394843	0.0572014	0.296559
Solyc02g084850.2.1				Y		Y	Y		Y	Y	1.41315	1.30408	0.110305	0.0579589	1.80313	0.591482	2.49528	2.53972	0.599746	0.502421	0.944726	2.10583	1.31563	1.06761
Solyc02g084910.2.1			Y	Y			Y				3.95682	4.08382	11.582	11.1571	5.30332	8.08358	6.70606	4.93005	7.02559	7.91313	8.78595	8.78526	7.66499	10.4686
Solyc02g084950.2.1	Y	Y	Y	Y	Y	Y	Y		Y	Y	10.2689	8.30491	0.22061	0.405713	1.48493	2.43165	5.45842	3.92163	0.342712	0.565224	1.98392	2.56648	0.514813	1.33452
Solyc02g084960.1.1			Y			Y		Y			9.23259	7.06947	11.6923	13.1567	7.00038	8.74078	9.51324	6.79749	29.6446	35.9231	12.3759	12.8324	21.6221	23.2503
Solyc02g084990.2.1				Y			Y		Y	Y	118.987	114.484	42.0261	36.6301	93.6566	90.9567	120.865	112.009	48.4937	43.428	85.7811	85.6809	85.0585	92.9417
Solyc02g085020.2.1		Y	Y	Y		Y	Y	Y	Y	Y	107.117	119.289	1.65457	2.28938	25.4559	33.583	53.6485	59.9075	4.2839	4.93001	10.2975	25.5003	13.6711	14.4721
Solyc02g085290.2.1		Y	Y	Y							2.26104	2.8827	0.772133	1.07224	1.06066	1.44584	1.09168	1.56865	0.856779	0.659428	1.13367	1.21743	1.08683	0.830367
Solyc02g085320.1.1							Y				1.69578	1.09817	0.661829	0.811425	0.318199	1.51156	1.40359	1.79274	0.771102	1.16185	2.0784	1.71099	1.31563	1.39383
Solyc02g085440.2.1							Y				1.03631	1.47567	0.992743	0.608569	1.2728	1.44584	2.02741	1.94214	0.599746	0.628026	0.944726	1.25034	1.25843	0.978646
Solyc02g085490.1.1			Y	Y		Y	Y				1.78999	2.36793	6.61829	5.59304	2.86379	3.54889	2.18337	1.90479	8.39644	8.07014	5.19599	3.88262	6.17775	5.27876
Solyc02g085500.2.1			Y	Y		Y	Y	Y	Y		3.20314	2.74542	9.59652	10.2298	3.92446	4.00893	2.65123	3.2867	10.7954	11.3673	8.78595	6.97556	7.37898	8.98575
Solyc02g085590.2.1				Y							4.52208	5.0104	1.76488	2.46325	4.34872	3.74605	5.45842	3.62284	1.45653	1.19325	1.51156	1.38195	2.97447	2.66904
Solyc02g085600.1.1							Y	Y	Y		2.16683	2.40225	1.32366	1.21714	5.40939	2.43165	3.89887	2.27828	1.28517	1.13045	2.17287	3.35617	1.37283	1.69039
Solyc02g085870.2.1			Y	Y							19.5015	25.2922	7.72133	10.3747	9.75811	13.6698	12.9442	15.4251	8.1394	7.0653	12.3759	16.715	7.37898	9.01541
Solyc02g085910.2.1			Y	Y		Y	Y	Y	Y		0.28263	0.205907	10.3686	9.09955	0.318199	0.788642	0.155955	0.149395	10.5384	11.0847	1.32262	0.723879	6.00615	6.64293
Solyc02g085950.2.1			Y	Y		Y	Y				8.66733	9.19717	3.08853	2.81101	5.51545	3.94321	12.6323	4.51921	2.57034	2.60631	4.25127	3.06003	2.34526	3.08422
Solyc02g086180.2.1				Y			Y		Y		64.7223	83.358	158.177	145.854	75.7314	64.3401	67.3725	65.9954	138.113	113.516	231.552	224.04	97.6428	95.1956
Solyc02g086210.2.1				Y			Y		Y	Y	0.65947	0.995217	2.97823	2.69509	0.530332	0.591482	0.623819	0.896372	0.685424	1.06764	0.566835	1.34905	0.80082	1.12693
Solyc02g086360.2.1				Y							19.0304	15.8205	40.9231	45.15	23.6528	23.0678	23.3932	21.4756	37.9553	38.027	21.2563	22.1112	33.6344	32.1174
Solyc02g086410.1.1				Y			Y		Y	Y	1.31894	1.61294	0.551524	0.347754	1.48493	2.03733	0.623819	1.49395	0.599746	0.502421	1.79498	1.77679	1.08683	1.39383
Solyc02g086590.2.1									Y		2.63788	3.05429	3.08853	4.95549	1.9092	1.57728	2.49528	2.61442	4.79796	5.36962	4.15679	3.32326	2.68847	3.11387
Solyc02g086650.2.1			Y							Y	31.5604	35.5533	41.4746	39.7019	23.5467	20.3733	31.3469	28.1237	14.908	13.1257	35.2383	35.4701	14.9868	17.3487
Solyc02g086770.2.1		Y	Y	Y		Y	Y	Y	Y		7.72522	8.57945	0.551524	1.41999	4.45479	3.41745	6.23819	6.4987	1.11381	1.06764	2.36181	2.59938	1.71604	1.24555
Solyc02g086820.2.1			Y								2.26104	3.4661	1.32366	1.30408	0.636398	1.51156	4.99055	1.4566	1.45653	1.16185	0.850253	0.592264	1.31563	1.12693
Solyc02g086880.2.1				Y			Y		Y		120.872	126.015	310.177	323.788	153.266	152.668	140.359	141.141	260.632	281.45	166.083	178.765	230.522	212.989
Solyc02g086930.2.1						Y	Y				9.42101	10.9131	7.94194	4.92651	12.9401	10.5809	15.2836	12.9227	6.76856	4.773	6.61308	8.06138	6.40656	6.85052
Solyc02g087010.2.1			Y	Y		Y	Y	Y	Y		1.41315	1.85316	4.6328	4.60774	1.591	2.36593	1.7155	2.27828	6.42585	6.78268	1.60603	2.00712	6.52096	5.21945
Solyc02g087160.2.1						Y					0.942101	1.16681	1.10305	1.15918	0.954598	1.38012	0.31191	0.821674	1.5422	1.41306	1.13367	1.71099	2.11645	1.80901
Solyc02g087410.2.1			Y			Y					3.01472	4.22109	2.09579	2.60815	3.28806	2.76025	4.36673	3.77223	2.05627	1.53866	5.19599	3.52068	1.71604	1.63108
Solyc02g087430.2.1				Y			Y				2.16683	2.91701	0.992743	1.39101	1.48493	2.36593	2.33932	2.76381	0.685424	1.06764	1.51156	1.8097	2.00205	1.80901
Solyc02g087510.2.1							Y		Y		20.0667	19.5268	36.4006	35.326	12.3037	16.0357	16.0633	16.2841	35.4707	36.4883	23.4292	20.9925	23.5098	22.5682
Solyc02g087620.2.1				Y			Y		Y		53.3229	53.021	116.813	118.323	47.3056	58.2938	58.795	52.0643	116.179	127.27	67.3589	72.5524	78.1944	85.765
Solyc02g087670.2.1				Y			Y		Y		2.63788	2.05907	1.32366	0.985302	2.54559	2.10305	2.80719	2.16623	1.19949	1.13045	1.98392	1.57937	1.60164	1.80901
Solyc02g087740.2.1		Y	Y	Y		Y	Y				36.4593	38.333	107.878	117.251	72.8676	78.0099	44.1352	45.9764	92.9606	105.508	76.6173	86.339	105.937	115.391
Solyc02g087800.2.1				Y			Y		Y	Y	2.44946	2.5052	0.441219	1.07224	1.16673	2.56309	1.55955	2.05419	1.88491	1.25605	1.41709	2.46777	2.45966	2.0166
Solyc02g087810.2.1				Y			Y		Y	Y	2.07262	1.9218	0.772133	0.724487	1.16673	2.95741	2.33932	3.0626	0.685424	0.910638	1.79498	1.02001	2.17365	1.42349
Solyc02g087850.1.1			Y	Y		Y		Y		Y	0.28263	0.549085	0.992743	1.04326	0.848531	1.05152	0.935729	1.08312	2.91305	2.5121	0.472363	0.723879	2.45966	2.19454
Solyc02g088100.2.1				Y			Y		Y	Y	28.3572	25.052	6.17707	7.65058	21.6375	24.3822	19.8063	21.6623	18.5921	23.1742	14.6432	15.5305	23.3382	20.7888
Solyc02g088190.2.1			Y	Y		Y	Y		Y		7.15996	9.50603	2.2061	2.23142	4.34872	4.86329	7.48583	5.19149	2.05627	3.51695	3.02312	3.98133	2.80287	2.90628
Solyc02g088200.2.1				Y			Y		Y	Y	0.37684	0.960899	2.09579	2.63713	0.424266	1.11724	0.779774	1.38191	1.02814	1.00484	2.36181	2.89552	0.858021	1.0083
Solyc02g088230.2.1				Y							8.66733	8.03037	3.30914	3.94121	4.66692	4.53469	5.45842	5.82642	5.22635	5.49523	3.96785	5.39619	6.92137	6.61328
Solyc02g088240.2.1			Y	Y		Y	Y		Y		0.847891	0.549085	2.97823	2.2604	0.318199	0.985803	0.155955	0.261442	3.08441	1.72707	0.566835	0.46065	2.05925	1.27521
Solyc02g088340.2.1				Y			Y		Y	Y	21.2915	26.459	49.0856	55.3508	19.9405	24.1193	19.0265	16.5082	37.784	36.7709	19.0835	22.8022	20.0205	18.3867
Solyc02g088560.2.1				Y			Y		Y	Y	40.6987	41.0784	11.4717	11.5918	39.7749	51.5246	42.2638	37.0874	10.8811	11.5871	22.2011	28.0009	34.0348	37.4851
Solyc02g088820.2.1						Y					55.3955	55.0115	79.7503	78.3605	47.0935	57.768	40.8602	42.615	163.216	164.323	41.4735	43.4327	92.0943	93.4459
Solyc02g089020.1.1		Y	Y								1.50736	2.60815	1.10305	1.65183	0.636398	0.722922	1.55955	0.896372	0.171356	0.408217	1.22814	1.28324	0.915223	0.563463
Solyc02g089080.2.1			Y								18.5594	21.1055	10.5893	9.85302	9.65204	11.5668	15.5955	12.6239	17.821	12.6861	14.1709	15.0369	10.0675	9.10438
Solyc02g089120.2.1									Y	Y	8.19627	8.23627	14.5602	16.895	8.06105	6.37486	11.5407	11.6528	9.42457	8.69816	8.31359	10.4304	5.83455	6.88018
Solyc02g089160.2.1			Y	Y		Y	Y	Y	Y		11.1168	10.1924	55.4833	57.4373	11.0309	17.8102	9.20133	8.62758	49.8646	55.2663	14.5488	13.984	59.4895	61.2988
Solyc02g089200.2.1			Y	Y		Y	Y	Y	Y	Y	0	0	40.5922	40.6002	0	0	0	0	2.05627	2.3237	0.755781	0	0.40041	0.326215
Solyc02g089210.2.1	Y	Y	Y	Y	Y	Y	Y	Y			0.18842	0.205907	20.7373	21.7346	18.2434	11.9611	2.49528	1.49395	24.7609	24.7128	8.12464	11.1543	31.4608	28.8552
Solyc02g089290.2.1				Y			Y		Y		13.0952	16.6098	39.2685	38.5427	14.5311	18.5988	19.4944	14.4167	26.5602	22.8602	18.4222	15.4647	24.1962	23.4579
Solyc02g089300.2.1			Y	Y		Y	Y	Y	Y		0.18842	0.411814	5.73585	5.2163	0.742465	0.985803	0.779774	0.522884	7.71102	9.4832	0.566835	0.625168	4.1757	3.82562
Solyc02g089540.2.1				Y		Y	Y		Y		27.0383	25.2236	10.0377	10.7804	22.9103	20.5047	28.5397	30.5513	13.6228	10.5822	17.0995	17.2086	13.8427	15.5397
Solyc02g089620.2.1			Y			Y		Y		Y	67.1718	46.2261	107.768	102.153	77.2163	99.6975	73.2988	51.1306	151.65	158.482	49.0313	61.2007	226.232	235.528
Solyc02g089690.2.1			Y			Y	Y	Y	Y		5.55839	4.90745	11.4717	7.9114	4.24266	4.79757	4.05482	3.95898	18.5064	22.2635	4.62916	5.36328	10.5823	12.5741
Solyc02g089840.2.1							Y		Y	Y	3.29735	3.4661	1.87518	1.68081	4.87905	4.60041	6.23819	5.45293	2.3133	2.98312	5.38494	5.46199	4.63332	3.91459
Solyc02g089850.2.1				Y			Y		Y		3.29735	3.63769	1.43396	1.41999	4.45479	3.74605	5.92628	3.99633	1.97059	1.97828	3.58996	4.6394	2.00205	2.87663
Solyc02g089940.2.1			Y	Y		Y	Y				22.2336	21.9634	6.39768	6.4914	11.0309	11.1724	15.5955	17.1805	3.25576	2.82612	9.73068	8.52203	5.60574	5.75325
Solyc02g090060.1.1				Y			Y		Y	Y	2.26104	2.29929	0.661829	0.927343	3.18199	2.30021	3.58696	2.20358	0.942457	0.973441	1.70051	1.31614	2.34526	2.40213
Solyc02g090120.1.1		Y	Y	Y	Y	Y	Y	Y	Y	Y	0.37684	0.205907	59.2337	59.1181	1.2728	1.51156	0.31191	0.112047	21.6765	23.4254	2.92865	2.96132	14.8152	14.2645
Solyc02g090220.2.1				Y							49.7429	43.7552	108.54	83.6927	67.2461	57.308	63.0057	57.4425	76.339	82.6797	70.0042	51.0993	52.7969	51.3344
Solyc02g090300.2.1				Y			Y				7.63101	5.69676	1.98549	3.47754	5.09119	4.46897	5.45842	6.72279	4.88364	5.30682	2.92865	3.38907	4.63332	5.16014
Solyc02g090310.1.1			Y	Y			Y				20.632	19.6298	9.2656	8.28813	17.8192	11.6982	20.4301	17.0311	9.42457	7.41071	15.9659	20.466	8.29421	10.2016
Solyc02g090340.2.1			Y	Y		Y	Y	Y	Y		0.65947	1.33839	3.52975	5.01345	1.2728	1.18296	1.55955	1.08312	7.11127	5.52663	4.06232	4.31037	4.46171	3.91459
Solyc02g090400.2.1				Y		Y	Y		Y	Y	1.41315	1.20112	4.85341	4.20202	1.69706	1.05152	0.935729	0.933721	2.74169	3.17153	3.58996	2.99423	2.63127	1.86832
Solyc02g090410.2.1		Y	Y	Y			Y		Y	Y	0.65947	0.857945	4.6328	4.46284	2.12133	2.23449	1.24764	0.97107	1.37085	0.942039	0.850253	0.9213	1.48724	1.80901
Solyc02g090430.2.1				Y			Y				24.1178	31.0576	10.2583	12.6061	21.4254	20.7676	27.448	27.414	10.5384	12.3407	21.3508	31.5874	15.2728	15.2728
Solyc02g090540.2.1			Y	Y		Y	Y	Y	Y	Y	32.0314	25.6011	1.21335	1.2751	27.6833	21.5562	35.2458	27.9743	1.62788	1.38166	13.3206	12.4376	8.69462	10.3203
Solyc02g090580.2.1				Y			Y			Y	3.86261	4.49563	1.65457	1.65183	2.01526	3.54889	4.36673	3.1373	3.34144	2.26089	3.87338	4.6394	4.0613	3.46975
Solyc02g090720.2.1		Y	Y						Y	Y	26.0962	25.5325	23.4949	23.5893	7.21252	11.3039	15.2836	12.7733	6.93991	8.63536	18.2332	20.3015	11.0971	9.19334
Solyc02g090730.2.1				Y						Y	6.31207	6.38311	14.8911	11.1861	8.69745	6.76918	5.61437	7.43242	7.96805	6.12326	6.32966	5.5278	4.86212	4.53736
Solyc02g090890.2.1			Y								32.9735	38.7791	18.7518	20.7203	22.4861	23.1335	29.1635	30.7754	15.3364	18.0244	20.5005	26.3229	15.7876	17.1115
Solyc02g090900.2.1				Y			Y				17.5231	14.6537	7.83164	7.41874	17.607	12.5526	17.7788	15.6118	11.2238	8.57256	16.5327	13.1285	13.9571	12.1293
Solyc02g090930.2.1		Y	Y	Y		Y	Y	Y	Y		0	0.171589	3.75036	3.1008	0.318199	0.788642	0.935729	0.0746977	9.59593	8.41555	5.76283	4.11295	3.08888	2.46144
Solyc02g090960.1.1			Y	Y							16.581	17.3648	6.17707	7.88242	11.3491	15.4442	14.5038	12.7733	7.96805	5.14982	12.2814	13.0956	9.15223	7.62158
Solyc02g091060.1.1						Y			Y	Y	6.40628	3.22587	1.43396	4.17304	7.31858	7.09778	4.52269	2.65177	6.93991	2.57491	3.02312	5.95555	9.72424	7.62158
Solyc02g091130.2.1							Y				2.8263	2.74542	2.3164	1.39101	2.65166	2.43165	4.52269	3.66019	2.14195	2.22949	1.32262	1.77679	2.97447	2.37248
Solyc02g091160.2.1							Y				0.56526	0.78931	0.330914	0.695507	1.69706	1.11724	2.33932	1.00842	0.856779	0.753631	0.850253	0.9213	0.915223	1.39383
Solyc02g091310.1.1		Y	Y	Y	Y	Y	Y	Y			20.0667	18.3257	6.06676	4.17304	7.74285	6.8349	12.1645	16.8817	2.82737	3.01453	27.8694	24.0854	1.77324	3.58837
Solyc02g091560.2.1			Y	Y							81.6801	89.5695	37.1727	41.2378	47.3056	44.624	65.9689	64.3147	37.6126	38.6864	35.4272	36.6546	31.3464	40.2728
Solyc02g091690.2.1		Y	Y	Y	Y	Y	Y		Y	Y	5.84102	6.82924	0.110305	0.318774	2.54559	1.84017	4.99055	4.29512	0.685424	0.314013	2.7397	4.04714	0.915223	1.66073
Solyc02g091910.1.1			Y						Y	Y	9.04417	11.2562	7.83164	7.70854	18.6677	17.8759	12.9442	12.5492	15.2507	14.6644	19.6503	15.3331	24.139	21.7082
Solyc02g091920.2.1		Y	Y	Y		Y					13.2836	8.64809	5.40493	4.69467	3.39412	4.86329	9.51324	4.48186	2.48466	5.27542	5.29046	5.88974	2.05925	3.9739
Solyc02g091930.2.1				Y			Y				2.44946	1.64725	0.330914	0.579589	0.742465	1.44584	3.1191	1.5313	1.28517	1.25605	1.22814	1.54647	1.08683	1.21589
Solyc02g092070.2.1			Y	Y		Y	Y		Y	Y	188.797	186.277	21.6197	22.546	137.674	132.163	162.037	174.12	30.33	30.4279	165.327	158.99	70.701	73.9619
Solyc02g092150.2.1			Y	Y		Y	Y	Y	Y		13.3778	12.0456	2.86792	3.44856	12.6219	10.4495	13.4121	15.4624	4.71229	4.8044	10.9588	12.8982	5.49134	5.78291
Solyc02g092200.2.1						Y					2.54367	2.91701	4.6328	3.73835	3.07593	3.94321	3.27505	2.01684	2.74169	3.79956	3.40101	2.56648	6.34936	4.47805
Solyc02g092210.1.1				Y					Y		2.63788	2.33361	0.992743	1.10122	2.65166	1.97161	2.65123	1.19516	0.599746	0.408217	1.70051	1.38195	1.25843	1.33452
Solyc02g092240.2.1		Y	Y			Y					5.08734	4.83881	7.83164	10.6934	14.0008	10.5809	5.77033	6.3493	14.908	15.9833	7.17992	7.66653	14.3004	16.2218
Solyc02g092370.1.1			Y	Y		Y	Y	Y	Y	Y	19.1246	17.9482	2.3164	1.94162	11.0309	9.59515	14.0359	12.5119	2.3133	2.4493	12.4704	13.2601	4.63332	5.13048
Solyc02g092460.2.1				Y		Y	Y		Y		0.847891	1.50998	1.87518	3.07182	1.16673	1.11724	1.09168	1.19516	1.97059	3.45414	1.32262	1.64518	1.83045	2.93594
Solyc02g092490.2.1										Y	87.8038	72.6851	74.0145	56.394	101.399	90.3653	88.5823	89.1517	94.0744	84.6265	86.2535	79.3963	151.126	137.871
Solyc02g092550.2.1				Y			Y		Y	Y	39.2856	31.5038	14.5602	10.0559	27.3651	27.7996	44.915	31.7839	17.1356	15.6379	29.9478	26.4545	24.1962	26.1862
Solyc02g092590.2.1										Y	3.67419	2.95133	2.2061	1.88367	1.80313	2.82597	2.96314	2.42767	4.62661	4.7102	1.88945	3.94843	3.71809	4.5077
Solyc02g092700.2.1			Y	Y		Y	Y				21.4799	21.2084	10.148	10.5485	12.4098	11.6325	27.1361	17.9648	11.5665	8.44695	8.03017	9.87107	9.20943	8.06642
Solyc02g092790.2.1			Y	Y		Y	Y	Y	Y		113.712	97.7028	30.3338	25.2121	61.8367	58.8196	82.656	61.14	11.8236	12.6547	61.5016	48.8289	24.1962	28.618
Solyc02g092820.2.1										Y	111.922	67.1256	167.112	141.912	98.1114	69.2034	114.783	109.843	99.3007	111.443	62.9187	68.4065	55.7142	70.4922
Solyc02g093020.2.1				Y			Y		Y		1.50736	1.85316	0.330914	0.724487	1.9092	1.3144	1.7155	1.38191	0.514068	1.03624	0.850253	2.36906	0.915223	1.51245
Solyc02g093040.2.1		Y	Y	Y	Y	Y	Y	Y		Y	3.01472	2.26498	12.2438	13.6493	21.1072	25.9595	3.58696	3.80958	93.4746	106.262	3.96785	4.77102	77.5651	69.306
Solyc02g093150.2.1			Y	Y		Y	Y	Y	Y	Y	50.1198	48.8686	1.43396	1.56489	32.8806	30.297	46.7864	42.503	1.37085	0.753631	52.5268	55.5741	13.6139	14.1459
Solyc02g093180.2.1									Y		13.5662	14.3105	26.4731	21.6766	10.8188	11.6982	15.2836	11.8396	22.1049	22.1379	12.187	15.9582	20.4209	18.7129
Solyc02g093220.2.1				Y		Y	Y				12.0589	11.5651	6.06676	4.81059	8.59138	8.28074	11.6966	13.707	9.25322	7.78753	8.78595	7.89686	6.69257	5.84222
Solyc02g093270.2.1		Y	Y	Y	Y	Y	Y	Y		Y	0.65947	0.583403	6.39768	6.98405	6.47005	6.90062	0.779774	0.373488	8.39644	7.1595	1.88945	1.74389	15.2156	13.3452
Solyc02g093280.2.1		Y	Y			Y					59.9176	60.0562	113.504	108.586	118.582	134.135	75.4821	73.3905	114.98	107.581	129.522	119.605	155.531	151.749
Solyc02g093420.2.1		Y	Y	Y			Y				12.0589	13.3496	3.97097	3.99917	6.15185	5.32333	8.73347	8.66493	3.08441	4.33338	9.16384	8.32461	4.63332	7.17674
Solyc02g093500.2.1							Y		Y		1.41315	1.16681	0.661829	0.608569	1.591	1.44584	0.779774	1.5313	0.771102	0.502421	1.79498	1.28324	0.80082	0.800711
Solyc02g093550.2.1		Y	Y								2.35525	3.77496	2.2061	2.78203	1.16673	1.90589	2.02741	2.53972	2.14195	1.72707	2.83418	2.20454	1.83045	1.36417
Solyc02g093850.2.1				Y			Y		Y	Y	73.9549	73.4744	24.0464	21.9954	66.9279	63.3543	67.5284	81.5699	17.3926	18.2442	72.366	70.2491	42.2147	55.1601
Solyc02g093890.1.1				Y			Y		Y		6.40628	5.49085	19.7446	15.6779	8.90958	8.21502	7.32988	8.36614	13.8798	13.5654	11.5257	12.635	11.0399	11.8624
Solyc02g093910.2.1			Y	Y		Y	Y		Y		13.472	14.2076	46.4383	47.3814	18.7738	17.3501	14.3478	14.0805	31.4438	34.7299	20.6895	19.3144	26.7703	31.9395
Solyc02g094010.1.1				Y			Y		Y	Y	1.13052	0.926581	3.08853	3.91223	0.742465	0.854362	1.87146	1.19516	0.856779	0.596625	1.51156	0.9213	1.02963	1.21589
Solyc02g094310.1.1								Y			1.78999	2.53952	1.43396	2.08652	1.06066	1.77444	2.49528	1.94214	1.11381	1.82128	1.88945	1.97421	2.91727	3.02491
Solyc02g094400.2.1				Y			Y	Y	Y		5.46418	7.27538	15.3324	17.4456	4.03052	4.86329	6.70606	6.87219	16.9642	18.2756	4.8181	7.07427	8.35141	10.172
Solyc03g005030.2.1				Y			Y				15.4504	17.5021	5.62554	6.7812	11.6673	12.684	16.2193	15.313	9.25322	8.88657	13.1317	15.8595	11.3831	11.0024
Solyc03g005070.1.1								Y			2.07262	3.0886	2.75762	3.15876	1.48493	1.643	3.74292	2.42767	2.48466	3.26574	3.21207	2.96132	3.66089	3.44009
Solyc03g005140.1.1				Y							0.847891	0.480449	1.21335	1.9706	1.37886	1.05152	1.55955	0.746977	0.257034	1.13045	1.0392	0.82259	1.83045	0.978646
Solyc03g005760.1.1			Y	Y		Y	Y				293.087	143.86	39.0479	76.9405	137.038	85.7648	245.317	105.1	53.9771	46.7252	93.4334	166.426	54.2842	59.045
Solyc03g005770.1.1			Y	Y		Y	Y				26.473	7.44697	1.43396	5.24528	7.31858	3.02313	18.5586	4.51921	2.14195	2.16669	4.91257	10.2659	2.45966	2.81732
Solyc03g005780.1.1		Y	Y	Y	Y	Y	Y	Y			52.004	35.9651	5.51524	5.53508	9.97024	10.6467	25.1087	20.2057	4.88364	5.96625	9.73068	18.097	2.86007	4.74495
Solyc03g005910.2.1	Y	Y	Y	Y		Y		Y			2.35525	3.0886	0.772133	0.52163	0.742465	0.788642	0.623819	0.746977	0.42839	0.345414	1.88945	1.48066	0.228806	0.266904
Solyc03g005960.2.1		Y	Y	Y		Y	Y	Y	Y	Y	45.5035	51.0992	1.10305	0.782446	20.5769	18.7303	38.9887	36.3404	2.65602	3.64255	14.2654	25.928	5.14813	10.172
Solyc03g006030.2.1		Y	Y	Y		Y	Y		Y	Y	16.9578	18.7032	1.98549	2.1155	4.77299	9.59515	11.0728	11.4287	1.71356	1.57007	4.53468	5.13296	4.51891	4.06287
Solyc03g006040.2.1			Y	Y			Y		Y	Y	31.9372	29.2731	6.72859	6.6363	12.6219	18.4017	20.586	22.7454	6.5972	7.2851	34.2935	38.4972	11.9551	17.3784
Solyc03g006240.2.1						Y	Y				4.89892	7.79014	9.59652	9.62118	5.40939	5.71766	5.14651	4.07102	9.68161	9.6088	9.6362	10.3317	9.66704	10.2906
Solyc03g006360.2.1	Y			Y	Y	Y	Y		Y	Y	3.20314	2.5052	31.2163	21.5028	3.71232	1.90589	12.6323	7.80591	41.8965	41.7637	9.6362	18.8208	3.14608	3.26215
Solyc03g006490.2.1				Y	Y		Y	Y	Y	Y	120.589	102.919	301.684	395.077	60.9882	72.1608	167.184	130.833	372.271	430.198	83.5138	158.826	154.73	165.391
Solyc03g006540.2.1		Y									2.26104	1.88748	0.441219	1.39101	0.636398	0.591482	2.49528	1.15781	1.5422	1.16185	0.944726	1.41485	1.02963	1.09727
Solyc03g006590.2.1			Y	Y			Y		Y	Y	35.2346	31.1949	17.4282	14.7506	40.6234	32.2029	41.9518	32.3814	92.9606	83.8729	38.8282	37.9378	70.6438	72.0343
Solyc03g006770.2.1			Y	Y		Y	Y	Y	Y		1.03631	1.78453	4.41219	4.86855	2.01526	1.70872	1.7155	1.606	4.88364	4.7416	2.17287	1.97421	4.0041	3.67734
Solyc03g006780.2.1				Y							2.63788	3.22587	6.72859	7.67956	4.56086	4.20609	4.99055	3.84693	10.4527	7.91313	4.44021	4.11295	5.49134	4.83392
Solyc03g006830.2.1		Y	Y		Y	Y			Y	Y	2.16683	1.85316	3.30914	2.89795	7.42465	6.57202	3.1191	2.65177	9.08186	8.38415	11.3367	9.37752	10.2963	12.6038
Solyc03g006840.2.1			Y	Y		Y	Y	Y	Y		7.5368	8.64809	37.9448	47.3814	11.137	9.13511	7.17392	7.43242	46.8658	44.0874	8.597	11.0885	29.9735	26.6607
Solyc03g006880.2.1		Y	Y	Y	Y	Y	Y	Y		Y	0.37684	0.377496	1.32366	0.985302	1.2728	2.23449	0.155955	0.186744	6.5972	6.09185	0.37789	0.526457	9.03783	8.54091
Solyc03g006920.2.1			Y								40.6987	41.4216	67.2859	61.4944	72.5494	56.4536	55.6759	48.3667	85.4209	80.356	62.6353	57.318	82.9421	83.7484
Solyc03g007030.2.1			Y	Y			Y		Y	Y	16.9578	11.5651	2.86792	3.30366	7.74285	7.42638	14.0359	11.8396	5.8261	4.8044	6.70755	6.4162	6.34936	7.11743
Solyc03g007220.2.1		Y							Y		2.44946	3.05429	2.3164	2.86897	0.848531	1.51156	1.40359	1.94214	2.05627	2.57491	1.79498	2.10583	1.31563	2.13523
Solyc03g007240.2.1			Y	Y		Y	Y	Y			277.26	325.196	696.023	615.002	386.294	409.502	312.689	309.248	777.699	658.234	511.38	459.169	886.451	770.224
Solyc03g007410.2.1		Y	Y	Y		Y	Y	Y	Y		2.07262	3.26019	0.110305	0.115918	0.848531	1.38012	1.40359	1.08312	0	0.188408	0.37789	1.15163	0.114403	0.474495
Solyc03g007500.2.1				Y			Y				32.5967	32.8421	13.6778	16.0836	31.1835	28.8512	41.1721	27.414	13.6228	13.0001	36.183	31.4558	27.5711	26.9276
Solyc03g007530.2.1				Y			Y		Y		21.8567	26.6649	7.39042	7.50568	18.4556	22.2791	25.4206	25.4719	4.54093	6.46867	9.44726	13.293	13.4423	14.2349
Solyc03g007760.2.1			Y	Y		Y	Y				35.0461	31.8469	9.59652	11.3889	15.4857	17.8102	31.5029	28.2357	4.79796	5.55803	18.989	16.4189	9.89585	12.6334
Solyc03g007770.2.1			Y	Y		Y	Y		Y	Y	9.60943	9.57467	0.772133	0.898364	6.57612	5.5205	9.35729	7.43242	0.599746	0.628026	4.8181	5.00134	3.77529	2.96559
Solyc03g007880.1.1						Y				Y	2.54367	3.43178	3.86067	6.81018	4.13659	2.49737	3.89887	4.51921	1.62788	1.66427	1.88945	1.61228	1.77324	2.28351
Solyc03g007890.2.1				Y			Y		Y	Y	201.327	191.734	88.1335	51.5545	187.844	221.148	153.46	231.712	67.7713	44.1188	52.1489	27.0138	257.807	222.835
Solyc03g013160.2.1			Y	Y			Y	Y	Y		2.35525	1.5443	5.40493	5.3612	1.9092	1.77444	2.65123	1.94214	4.45525	5.65224	3.1176	3.84972	4.51891	3.29181
Solyc03g019750.2.1			Y	Y		Y	Y	Y	Y		1.41315	1.44135	6.17707	5.651	1.591	1.44584	0.779774	1.41926	6.76856	7.37931	2.17287	1.44776	4.46171	4.35942
Solyc03g019790.2.1			Y	Y		Y	Y	Y	Y		7.72522	6.5547	0.22061	0.637548	4.56086	3.68033	4.99055	4.9674	0.685424	0.565224	3.96785	4.34327	0.972424	1.12693
Solyc03g019950.2.1								Y		Y	31.4662	29.7535	22.5022	22.9807	26.0923	25.368	32.9065	27.7128	27.2456	27.9158	23.0513	25.9938	54.8562	55.6346
Solyc03g020040.2.1			Y	Y		Y		Y		Y	6.31207	5.14767	1.43396	2.05754	1.69706	2.82597	6.86201	1.38191	1.88491	2.95172	2.7397	7.92976	0.686417	0.622775
Solyc03g025140.1.1									Y	Y	2.73209	2.67679	1.87518	1.21714	2.96986	2.95741	2.49528	2.09153	1.88491	2.19809	4.06232	2.66519	3.31768	3.26215
Solyc03g025190.2.1		Y	Y	Y		Y	Y	Y	Y	Y	37.4956	40.7352	0.992743	1.01428	11.3491	15.2471	17.9348	20.99	0.342712	1.31886	4.8181	6.81104	4.63332	4.77461
Solyc03g025380.2.1						Y		Y			3.86261	3.87791	3.41945	3.18774	6.25792	5.78338	7.01797	5.56498	5.91178	3.57975	6.51861	5.26457	3.48929	2.55041
Solyc03g025700.1.1							Y				0.75368	0.960899	1.43396	1.65183	0.954598	1.38012	0.467864	0.746977	1.02814	1.44446	1.13367	1.18453	1.20123	1.18624
Solyc03g025710.2.1				Y			Y				32.4083	32.6019	18.9724	14.4608	26.1984	24.9079	35.0898	31.0369	14.3939	9.6716	16.6272	12.4376	21.3361	24.1103
Solyc03g025800.2.1						Y					3.01472	3.22587	5.73585	4.17304	4.34872	2.76025	3.27505	2.01684	6.93991	4.8672	3.58996	3.42197	5.09093	5.10082
Solyc03g026040.2.1			Y								161.193	155.391	289.109	301.184	211.178	234.095	162.505	193.542	312.553	347.989	192.157	243.914	312.034	332.176
Solyc03g026080.2.1		Y	Y	Y		Y	Y				5.08734	4.83881	1.32366	1.68081	2.86379	2.16877	4.67864	4.18307	1.11381	1.03624	2.26734	2.40196	1.43004	1.66073
Solyc03g031430.1.1									Y		1.31894	1.57862	1.87518	1.94162	1.06066	0.788642	2.02741	1.71805	2.74169	3.39134	1.79498	1.71099	0.972424	1.39383
Solyc03g031440.2.1							Y				4.99313	4.56427	6.72859	6.28855	3.60626	3.15457	4.21078	2.76381	14.9936	10.6764	5.29046	5.19877	4.74772	6.31672
Solyc03g031620.2.1				Y			Y		Y		77.6291	81.745	25.8113	29.5591	58.8669	57.1766	57.3914	70.9254	30.4157	32.5004	44.4021	41.6888	38.897	44.3356
Solyc03g031730.2.1			Y			Y				Y	4.05103	4.6329	5.40493	4.231	4.98512	5.71766	4.36673	2.98791	5.65474	5.02421	6.80203	7.20588	8.75182	9.87543
Solyc03g031800.2.1		Y	Y								7.44259	7.41265	4.85341	3.82529	2.22739	2.95741	6.23819	4.59391	2.65602	3.10873	4.91257	6.67943	3.54649	3.52906
Solyc03g031940.2.1			Y	Y			Y		Y		54.736	58.9237	15.553	17.6485	34.2594	36.7376	47.5662	40.1873	10.367	11.1161	29.0976	32.5087	22.9378	25.8896
Solyc03g033330.2.1			Y	Y			Y		Y	Y	5.84102	7.8931	40.0406	41.2378	10.0763	10.5152	10.6049	8.40349	20.7341	17.8987	9.91962	13.5563	14.5864	15.4507
Solyc03g033490.1.1									Y		1.13052	0.960899	0.882438	0.666528	2.43953	1.77444	1.7155	1.12047	1.5422	0.690829	1.88945	0.987107	1.31563	1.0083
Solyc03g033510.2.1							Y		Y		2.92051	3.0886	5.51524	5.79589	2.12133	2.76025	1.7155	3.1373	8.31076	7.66192	3.30654	2.33615	4.34731	4.30011
Solyc03g033610.1.1				Y			Y		Y		45.4092	44.27	14.4499	17.4167	42.3205	40.6151	46.4745	44.1463	17.9924	16.0147	39.6785	39.0566	28.7723	27.4614
Solyc03g033680.1.1				Y			Y		Y	Y	3.20314	1.64725	0.661829	0.956323	3.81839	2.03733	3.1191	2.65177	1.97059	0.753631	1.22814	0.82259	2.91727	2.4911
Solyc03g033860.1.1				Y			Y		Y	Y	5.74681	4.87313	2.3164	1.44897	5.62152	6.30914	6.5501	6.01316	1.5422	1.19325	5.66835	4.31037	4.29011	6.61328
Solyc03g034070.1.1			Y	Y		Y	Y		Y		23.0815	20.0759	4.85341	3.70937	14.5311	9.79231	24.173	16.172	5.56907	4.23918	10.8643	11.9769	6.63537	7.11743
Solyc03g034220.2.1			Y	Y		Y					580.334	535.083	232.964	291.794	295.501	310.594	444.159	430.707	211.453	236.891	245.062	299.357	217.022	204.626
Solyc03g034300.1.1				Y			Y		Y	Y	3.01472	3.94655	1.21335	1.44897	3.28806	3.02313	5.30246	2.53972	1.97059	2.3237	4.91257	2.7968	3.43209	2.40213
Solyc03g034370.1.1		Y	Y		Y	Y				Y	12.6241	7.30969	7.61103	6.20161	5.51545	4.07465	11.2287	8.66493	7.11127	5.90345	7.36886	6.94266	2.45966	2.90628
Solyc03g034400.2.1		Y	Y	Y			Y		Y	Y	2.63788	3.12292	10.148	8.98364	0.848531	1.51156	0.623819	2.01684	2.3133	2.19809	3.87338	2.53358	0.858021	0.978646
Solyc03g043700.2.1				Y			Y				1.22473	1.75021	4.08128	4.11508	2.54559	2.30021	1.55955	2.01684	3.08441	2.60631	1.60603	1.74389	3.48929	1.69039
Solyc03g043930.2.1				Y			Y		Y	Y	8.47891	10.0894	3.75036	3.01386	9.65204	9.06939	10.9168	11.2047	4.79796	3.83096	9.25831	8.06138	8.86622	6.70224
Solyc03g044050.1.1				Y			Y				1.22473	1.09817	2.2061	3.12978	1.06066	2.03733	0.623819	1.26986	2.99873	2.70051	1.60603	1.64518	2.34526	1.57177
Solyc03g044090.2.1				Y			Y		Y		3.39156	4.83881	1.43396	2.20244	5.40939	6.1777	5.45842	6.3493	7.53966	6.43727	3.96785	5.10006	3.8325	3.44009
Solyc03g044100.2.1			Y	Y		Y	Y				0.56526	0.926581	1.98549	2.17346	1.9092	0.788642	1.40359	0.821674	2.39898	1.66427	2.64523	3.84972	2.34526	1.95729
Solyc03g044300.2.1			Y	Y		Y	Y	Y	Y		6.97154	8.44218	1.32366	0.985302	4.77299	4.00893	7.64179	6.23726	0.171356	0.0628026	1.98392	2.07293	2.00205	1.39383
Solyc03g044420.1.1				Y							2.16683	1.06385	0.22061	0.724487	0.742465	0.788642	0.935729	0.859023	1.02814	0.879237	0.850253	1.28324	1.48724	1.06761
Solyc03g044480.2.1				Y			Y		Y	Y	1.8842	1.85316	0.551524	0.405713	2.43953	2.16877	3.89887	2.27828	1.02814	0.565224	1.13367	1.94131	1.48724	2.16488
Solyc03g045140.2.1		Y	Y								11.8705	13.0751	7.39042	10.1428	5.30332	6.24342	8.10965	8.40349	8.56779	7.37931	5.29046	7.56782	7.20738	5.04151
Solyc03g051790.2.1				Y							20.2552	17.2962	7.94194	7.38976	11.8794	14.327	15.4395	14.7528	7.19695	7.00249	11.4312	12.2401	11.7835	10.6465
Solyc03g053040.1.1				Y			Y			Y	3.10893	4.77018	2.09579	1.94162	3.50019	3.02313	4.52269	3.77223	1.97059	2.16669	5.29046	3.48778	4.57611	4.35942
Solyc03g053110.2.1			Y	Y							13.001	14.688	5.95646	4.75263	7.10645	8.74078	11.8526	9.44926	4.36958	4.27058	6.51861	9.44333	5.72014	5.96085
Solyc03g058330.2.1										Y	0.847891	0.995217	2.2061	1.30408	1.2728	0.657202	1.09168	0.709628	0.342712	0.628026	0	0.690975	0.743619	0.504151
Solyc03g058910.2.1		Y							Y	Y	5.84102	6.14289	7.50072	7.07099	2.75773	2.95741	5.14651	5.45293	2.99873	2.79472	3.49549	4.37618	3.60369	2.90628
Solyc03g058950.2.1				Y			Y				19.4073	23.5077	7.72133	8.95466	14.8493	18.5331	18.5586	23.2683	8.73915	6.84549	14.8322	15.9253	16.0164	14.3535
Solyc03g059390.2.1			Y	Y	Y	Y	Y	Y	Y	Y	0.47105	0.274542	9.1553	8.7518	0.636398	0.920083	0.155955	0.186744	4.11254	3.61115	3.40101	2.36906	1.60164	1.72005
Solyc03g060510.2.1										Y	6.40628	7.41265	12.7954	11.0412	5.93972	6.5063	6.39415	6.01316	13.2801	9.4832	6.32966	5.23167	6.34936	5.07117
Solyc03g062710.2.1			Y			Y					1.69578	2.33361	0.772133	1.24612	1.06066	1.57728	2.18337	2.09153	0.942457	0.847835	0.755781	1.67808	0.743619	0.622775
Solyc03g062720.2.1		Y	Y								4.23945	5.55949	3.41945	2.72407	2.43953	2.56309	2.96314	3.47344	1.79924	2.10389	1.98392	2.66519	1.60164	2.0166
Solyc03g063090.1.1							Y			Y	3.7684	5.07904	2.3164	3.07182	4.24266	4.73185	7.32988	6.57339	14.8223	9.76581	5.47941	4.50779	6.80697	6.55396
Solyc03g063100.1.1		Y	Y	Y	Y	Y			Y	Y	0	0	0	0.173877	2.33346	2.16877	0	0.0746977	2.39898	2.2923	0.0944726	0.263229	3.48929	3.46975
Solyc03g063380.1.1			Y	Y							0.65947	0.549085	1.43396	1.36204	1.37886	0.985803	1.09168	0.933721	1.28517	1.03624	1.0392	1.74389	1.31563	1.33452
Solyc03g063550.1.1		Y	Y		Y	Y		Y	Y	Y	0.65947	0.754992	1.54427	1.10122	3.71232	4.86329	2.02741	0.709628	7.11127	7.85033	1.0392	1.08582	16.0736	14.65
Solyc03g064030.2.1									Y		16.2041	16.953	29.8926	32.5439	16.3342	15.0499	15.2836	16.172	23.2187	26.5341	20.784	18.8867	21.3933	22.3309
Solyc03g064040.1.1		Y									1.41315	2.64247	5.29463	3.21672	3.71232	5.12617	3.43101	3.212	4.88364	3.20293	5.38494	3.88262	3.71809	2.758
Solyc03g070430.1.1			Y		Y	Y	Y	Y		Y	3.95682	2.60815	4.30189	5.59304	3.71232	4.40325	1.87146	1.7554	87.6485	67.0732	15.3046	9.77236	44.1023	39.2645
Solyc03g071590.2.1		Y	Y	Y		Y	Y				3.86261	7.00083	1.76488	1.50693	1.80313	2.43165	3.74292	2.98791	1.5422	1.28745	1.51156	0.723879	1.54444	1.66073
Solyc03g071690.2.1		Y	Y	Y							2.07262	2.05907	0.772133	0.724487	0.848531	0.722922	0.935729	1.00842	1.37085	0.910638	0.944726	1.18453	0.457611	0.711743
Solyc03g078150.2.1				Y							4.61629	5.14767	2.09579	2.2604	2.96986	3.81177	3.58696	3.3614	4.19822	2.4493	4.72363	2.56648	3.71809	3.4994
Solyc03g078360.1.1				Y			Y		Y		2.26104	1.16681	0.110305	0.434692	1.48493	1.44584	1.09168	1.5313	0.514068	0.47102	0.755781	1.34905	0.743619	0.860023
Solyc03g078780.1.1			Y								5.18155	3.39746	2.3164	2.63713	2.86379	3.48317	3.58696	3.1373	0.514068	0.314013	2.92865	2.69809	1.48724	1.89798
Solyc03g078790.1.1		Y	Y	Y		Y					2.92051	2.5052	0.661829	1.24612	0.848531	0.985803	1.24764	1.7554	0.171356	0.219809	1.13367	1.71099	0.572014	0.800711
Solyc03g080060.1.1			Y	Y		Y	Y	Y	Y		10.0805	10.1581	2.09579	2.2604	4.98512	6.1777	9.20133	9.89744	1.5422	2.4179	2.17287	3.78391	2.00205	2.60972
Solyc03g080180.2.1			Y			Y	Y	Y		Y	0.847891	1.44135	1.87518	1.36204	0.636398	1.24868	0.779774	0.597581	1.62788	1.91548	0.472363	0.361939	3.71809	3.85527
Solyc03g081240.2.1			Y					Y		Y	1.60157	1.95612	1.32366	2.83999	2.33346	2.10305	2.49528	2.42767	4.19822	4.01937	1.32262	2.89552	4.97652	4.7153
Solyc03g081260.2.1		Y	Y	Y		Y	Y		Y	Y	16.2983	15.5803	2.75762	1.50693	4.24266	5.06045	10.1371	8.77698	4.11254	5.30682	10.203	11.4175	3.60369	4.80426
Solyc03g082420.2.1				Y			Y		Y	Y	4.89892	4.39268	1.10305	0.927343	4.03052	3.87749	3.27505	4.8927	2.3133	1.78987	2.17287	1.48066	4.74772	2.72835
Solyc03g082640.1.1									Y		2.44946	2.09339	1.54427	1.70979	4.03052	2.82597	4.05482	2.76381	1.45653	1.13045	3.1176	4.08004	2.40246	2.52076
Solyc03g082690.2.1			Y			Y		Y			0.37684	1.16681	1.54427	1.99958	1.591	0.854362	1.09168	0.896372	2.91305	4.01937	0.850253	1.74389	2.11645	3.46975
Solyc03g082800.1.1				Y							2.73209	4.56427	0.772133	2.46325	1.9092	1.90589	1.87146	2.53972	2.14195	2.16669	1.88945	2.66519	2.45966	1.98695
Solyc03g083060.2.1			Y	Y		Y	Y				1.69578	1.81884	3.86067	3.94121	3.18199	3.48317	2.49528	1.71805	7.3683	8.10154	1.0392	1.77679	5.72014	4.68564
Solyc03g083370.2.1			Y	Y		Y	Y	Y	Y		0.847891	1.09817	3.97097	3.21672	0.424266	1.3144	1.09168	0.784326	2.74169	2.98312	1.60603	1.44776	3.03168	2.87663
Solyc03g083560.1.1							Y		Y		208.769	165.858	121.556	93.6037	262.196	201.301	239.079	199.966	124.747	131.76	236.465	223.02	152.556	167.378
Solyc03g083620.1.1				Y			Y				64.2513	63.6939	24.4877	23.966	44.4418	47.91	56.6116	53.4835	31.5295	33.9762	39.6785	46.3611	39.5262	41.459
Solyc03g083910.2.1				Y			Y		Y		58.4102	60.1591	26.9144	24.1979	50.4876	53.3648	55.5199	57.4799	50.293	52.5658	56.0222	59.5555	44.4455	47.835
Solyc03g083960.2.1				Y			Y		Y	Y	51.6271	53.2612	7.50072	9.33139	39.987	50.8674	59.2628	55.8739	8.31076	8.63536	30.3257	36.3914	29.4587	31.7319
Solyc03g093140.2.1			Y							Y	2.26104	3.22587	2.4267	3.5355	1.37886	3.02313	1.87146	2.20358	1.79924	3.07733	3.02312	2.27035	0.915223	1.42349
Solyc03g093330.2.1				Y			Y		Y		9.51522	9.50603	3.19884	2.83999	6.57612	6.90062	8.88942	7.9553	4.45525	4.7102	5.38494	8.55493	4.63332	5.66429
Solyc03g093370.1.1		Y	Y		Y	Y		Y	Y	Y	0.28263	0.205907	0.110305	0.260815	1.591	2.16877	0.31191	0.373488	5.22635	3.04593	0.0944726	0.394843	5.66294	5.78291
Solyc03g093380.1.1									Y		5.55839	5.90266	12.1335	9.56323	5.09119	5.32333	8.10965	6.08786	8.56779	7.1909	6.70755	6.97556	6.80697	5.63463
Solyc03g093400.2.1				Y			Y		Y	Y	4.23945	4.70154	1.98549	1.2751	3.07593	3.02313	3.89887	5.19149	1.88491	2.3865	2.26734	2.33615	4.57611	4.32977
Solyc03g093620.1.1			Y	Y		Y	Y	Y	Y		1.60157	2.29929	5.18432	5.41916	2.12133	1.70872	2.49528	1.79274	7.02559	8.19574	3.1176	3.38907	5.37693	4.68564
Solyc03g093800.1.1		Y	Y	Y		Y	Y	Y	Y		0.0942101	0.754992	7.83164	4.43386	2.86379	2.36593	0.935729	1.49395	6.08313	4.8358	6.14072	6.05426	6.40656	4.68564
Solyc03g095310.2.1			Y	Y			Y		Y		4.89892	5.90266	23.8258	23.8501	7.53071	9.39799	9.35729	6.4987	20.3057	19.9084	12.0925	13.0627	14.8152	13.5528
Solyc03g095780.1.1		Y	Y	Y		Y	Y		Y	Y	8.10206	5.42221	33.8636	35.0072	13.8947	16.1672	9.35729	7.05893	18.2494	18.4326	7.08544	9.54204	17.5608	14.5611
Solyc03g095820.2.1				Y			Y				5.36997	7.03515	3.52975	2.75305	6.25792	4.79757	7.17392	7.09628	3.17008	3.07733	4.91257	4.6394	3.66089	3.79596
Solyc03g095940.1.1		Y		Y			Y		Y	Y	3.86261	2.84838	32.8708	31.5586	2.43953	0.722922	1.87146	2.65177	3.5128	4.45899	1.22814	0.9213	2.17365	1.45314
Solyc03g095970.2.1		Y		Y			Y		Y	Y	8.94996	6.38311	15.0014	18.6048	3.92446	2.49737	4.52269	4.22042	13.7941	15.0098	3.96785	3.32326	4.29011	3.76631
Solyc03g096060.1.1		Y	Y	Y			Y				0.847891	0.411814	2.53701	2.1155	2.22739	1.18296	0.779774	0.933721	2.05627	1.75847	1.79498	1.8097	1.14403	1.21589
Solyc03g096290.2.1		Y	Y	Y		Y	Y		Y		47.1992	39.74	9.81712	8.92568	16.6524	21.0962	31.3469	26.2189	11.6522	10.0798	13.8875	12.6021	14.3576	11.1506
Solyc03g096630.1.1				Y		Y	Y	Y	Y	Y	1.50736	1.95612	0.330914	0.0869384	1.80313	2.10305	2.65123	3.212	0.0856779	0.0628026	0.566835	0.526457	0.972424	0.919334
Solyc03g096660.1.1		Y	Y	Y							2.8263	4.39268	1.87518	1.53591	1.37886	1.90589	2.33932	2.12888	2.65602	1.94688	3.1176	2.63229	1.14403	1.83867
Solyc03g096760.1.1			Y	Y		Y	Y		Y	Y	2.73209	2.43656	0.22061	0.0579589	1.16673	1.38012	2.33932	2.61442	0.0856779	0.157007	0.661308	0.263229	0.686417	0.741399
Solyc03g096780.1.1		Y	Y	Y		Y	Y	Y	Y	Y	8.57312	9.78058	0.22061	0.637548	4.56086	3.68033	7.17392	6.57339	1.11381	0.533822	2.0784	1.97421	1.77324	1.98695
Solyc03g096840.2.1						Y					67.1718	62.7673	74.2351	59.7557	71.7009	57.2423	93.5729	78.9181	48.3224	42.8628	55.4554	53.0077	42.7295	39.0569
Solyc03g096900.2.1							Y				40.5103	45.0593	20.7373	22.6619	39.1385	36.2775	43.0435	45.2294	29.4732	29.2032	35.2383	33.9894	27.9715	31.9691
Solyc03g097080.2.1							Y				2.63788	2.23066	0.882438	1.33306	2.86379	1.643	2.02741	2.76381	1.28517	1.57007	2.17287	2.59938	1.54444	1.83867
Solyc03g097150.2.1				Y			Y		Y	Y	4.23945	4.11814	1.10305	1.10122	4.13659	3.48317	5.30246	3.84693	3.25576	3.64255	5.47941	6.35039	2.17365	3.88493
Solyc03g097170.2.1		Y	Y								8.47891	9.84921	5.29463	5.88283	3.81839	4.07465	5.92628	5.30353	7.02559	6.18606	3.21207	2.43486	4.46171	4.56702
Solyc03g097230.1.1				Y							4.99313	4.25541	1.98549	1.65183	2.86379	2.43165	4.05482	2.87586	2.39898	3.01453	2.26734	2.33615	2.86007	2.58007
Solyc03g097530.2.1			Y	Y		Y	Y	Y	Y		6.02944	7.17242	15.3324	13.5624	6.89432	6.96634	7.32988	5.45293	25.4463	19.5316	7.65228	6.51491	16.4168	16.0142
Solyc03g097540.1.1				Y			Y		Y		0.56526	0.583403	1.87518	2.4053	0.848531	0.722922	0.31191	0.709628	2.39898	1.94688	0.283418	1.08582	1.48724	0.919334
Solyc03g097630.2.1				Y			Y				45.1266	46.8781	20.4064	24.2268	43.5933	43.8354	48.5019	46.0885	41.4681	38.8434	40.3398	37.8062	44.1595	45.7591
Solyc03g097820.1.1			Y								41.6408	41.4902	20.9579	21.0971	35.4262	34.7003	34.9339	38.1705	11.1381	8.91797	40.4343	44.7818	19.5629	21.5302
Solyc03g097920.1.1										Y	27.1325	24.0225	19.9652	19.6191	32.7745	22.4106	31.8148	24.6876	37.1842	37.9014	33.0654	36.9178	44.7887	41.3107
Solyc03g097940.2.1							Y		Y		3.10893	3.94655	6.28737	6.17263	2.43953	2.49737	3.1191	3.02526	3.42712	2.63771	3.58996	2.7968	4.1185	3.11387
Solyc03g098060.1.1						Y					21.0088	16.5069	20.5167	9.41833	33.8352	16.7586	35.7137	19.272	17.821	13.1257	24.8463	26.1254	12.4127	13.6121
Solyc03g098100.2.1						Y					1.03631	1.26976	1.87518	1.76775	2.75773	1.643	0.779774	1.19516	1.45653	1.41306	1.79498	1.51356	2.45966	2.13523
Solyc03g098320.2.1							Y				137.547	135.59	74.8969	64.8271	130.886	138.144	155.955	171.282	72.6549	60.0707	84.0806	70.315	118.922	136.447
Solyc03g098710.1.1		Y	Y	Y	Y	Y	Y	Y	Y	Y	0	0.240225	49.0856	36.1374	2.22739	2.89169	0.155955	0.261442	57.3185	54.6697	21.7287	30.8636	14.3576	9.6975
Solyc03g098720.2.1		Y	Y	Y	Y	Y	Y	Y	Y	Y	0	0.240225	45.9971	33.5872	0.954598	2.03733	0.467864	0.373488	44.2955	39.126	3.40101	3.22455	10.3535	7.59192
Solyc03g098730.1.1							Y		Y	Y	0.942101	1.37271	2.64731	2.31836	1.37886	0.788642	0.779774	1.34456	3.59847	3.73676	1.88945	1.67808	0.858021	0.593119
Solyc03g098780.1.1		Y	Y	Y	Y	Y	Y	Y	Y	Y	7.06575	10.0208	94.9724	97.4	14.319	20.439	12.4764	4.63126	64.7725	62.049	30.6091	59.72	37.5241	33.7781
Solyc03g111100.1.1				Y		Y	Y		Y		2.63788	3.53473	1.10305	1.18816	4.66692	2.16877	5.30246	3.3614	1.19949	1.28745	1.98392	3.06003	1.25843	1.89798
Solyc03g111120.2.1							Y				4.33366	2.91701	2.3164	1.53591	1.48493	2.23449	3.58696	3.77223	2.48466	1.69567	2.36181	2.7968	2.05925	1.92764
Solyc03g111140.2.1				Y							9.13838	8.71672	3.52975	4.43386	6.15185	5.8491	6.86201	6.83484	6.25449	5.74644	5.00705	6.74523	4.1185	5.2491
Solyc03g111310.2.1				Y			Y		Y	Y	14.0373	15.2371	43.4601	46.9757	21.1072	17.4816	20.742	18.9732	25.1893	26.7539	23.4292	27.2771	20.0205	21.293
Solyc03g111400.1.1				Y			Y		Y	Y	12.2473	9.64331	3.64006	2.66611	9.43991	10.1209	7.9537	9.26251	6.08313	4.23918	8.03017	5.16586	7.66499	7.50296
Solyc03g111610.2.1			Y	Y		Y	Y				3.67419	3.32883	0.992743	1.30408	2.33346	1.38012	5.77033	2.87586	1.02814	1.97828	1.70051	1.8755	1.14403	1.18624
Solyc03g111690.2.1							Y		Y	Y	2.26104	2.23066	3.30914	4.28896	0.954598	1.643	2.65123	1.56865	4.11254	4.36478	2.55076	2.96132	1.60164	1.24555
Solyc03g111710.2.1					Y		Y				10.8342	8.95695	5.18432	6.89711	6.25792	6.76918	15.1276	13.7444	5.22635	8.41555	4.25127	9.77236	6.92137	7.79951
Solyc03g111820.2.1		Y	Y	Y			Y		Y	Y	0.75368	2.36793	36.18	32.8917	4.87905	3.81177	2.80719	3.51079	19.0205	11.6185	24.9408	20.2686	3.48929	4.59667
Solyc03g112010.2.1		Y	Y	Y		Y	Y		Y		4.61629	4.11814	0.882438	0.318774	1.16673	1.38012	3.58696	2.76381	0.0856779	0.282612	0.944726	2.33615	0.228806	0.771055
Solyc03g112030.1.1				Y			Y		Y	Y	2.92051	1.50998	0.330914	0.405713	1.37886	1.3144	2.49528	1.4566	0.342712	0.659428	1.22814	1.08582	1.60164	2.25385
Solyc03g112060.2.1				Y			Y		Y	Y	56.4318	60.8112	17.0972	14.7506	41.8962	46.0041	57.3914	58.3762	6.34017	7.31651	37.978	44.1566	34.6069	37.5444
Solyc03g112130.1.1			Y		Y	Y					1.60157	2.29929	3.97097	3.68039	3.92446	4.14037	1.55955	2.12888	7.19695	8.13294	3.7789	3.75101	6.17775	7.56227
Solyc03g112160.2.1				Y			Y				7.25417	7.27538	16.4354	13.8812	7.84891	7.42638	5.92628	6.94688	17.821	17.9301	6.70755	7.40331	10.5823	10.0237
Solyc03g112200.1.1		Y	Y	Y	Y	Y	Y		Y		0.28263	0.377496	3.86067	3.27468	1.69706	1.77444	0.623819	0.373488	7.45398	7.50491	3.58996	2.46777	3.43209	1.80901
Solyc03g112390.2.1				Y			Y				1.97841	1.26976	0.551524	0.463672	0.742465	0.985803	2.18337	1.15781	0.171356	0.345414	0.944726	0.987107	0.629216	0.830367
Solyc03g112430.1.1			Y			Y		Y			8.29049	9.16286	12.5747	10.4616	9.01564	7.4921	12.6323	7.8806	15.7647	12.9059	7.08544	8.48912	22.7662	21.2633
Solyc03g112440.1.1			Y	Y		Y	Y		Y		2.92051	2.74542	13.7881	10.0269	6.04579	4.86329	4.36673	3.1373	6.16881	6.75128	4.06232	2.86261	8.69462	7.94779
Solyc03g112460.2.1		Y	Y	Y							12.3415	13.4526	35.9594	32.2252	35.6383	27.7996	20.4301	15.2757	36.3274	39.7541	19.4614	22.868	31.6896	32.6215
Solyc03g112580.2.1			Y			Y		Y		Y	9.70364	10.7415	13.7881	14.7216	16.5464	15.1814	12.4764	11.5408	24.5039	18.3384	13.1317	12.0427	33.9776	35.1126
Solyc03g112590.2.1	Y	Y	Y	Y							11.8705	11.5651	24.1567	24.8934	40.0931	28.1282	28.6957	29.1694	22.876	23.6452	21.5397	30.4029	21.3933	27.7876
Solyc03g112620.2.1				Y			Y				13.0952	14.9626	5.07402	5.27426	7.42465	9.20083	11.3847	10.8685	9.16754	8.50976	12.187	12.1085	9.09503	9.54922
Solyc03g112650.2.1				Y			Y		Y		10.2689	9.47172	4.5225	4.63672	8.48531	9.98947	10.449	9.636	8.31076	6.06045	8.88042	7.86396	9.32383	9.04506
Solyc03g112780.1.1							Y				1.22473	2.36793	1.65457	1.39101	2.65166	1.84017	3.27505	3.2867	1.5422	1.28745	3.02312	2.69809	2.40246	2.66904
Solyc03g112790.2.1							Y			Y	3.95682	3.98087	2.4267	2.2604	5.51545	3.28601	5.77033	4.78065	4.19822	3.57975	4.06232	4.17875	5.54854	5.13048
Solyc03g112920.1.1			Y	Y			Y	Y	Y	Y	10.9284	10.1238	0.992743	1.33306	11.137	10.7124	9.04538	7.69386	0.599746	1.25605	8.21911	12.3059	4.23291	4.18149
Solyc03g113040.2.1		Y	Y								1.60157	2.26498	1.21335	1.21714	0.954598	0.920083	1.7155	1.23251	0.771102	0.659428	1.51156	0.690975	0.80082	1.09727
Solyc03g113060.2.1				Y			Y				6.78312	9.40308	16.9869	16.7501	9.54598	9.20083	9.82515	7.50712	13.023	10.9905	12.5649	12.7666	10.4107	12.1293
Solyc03g113080.2.1				Y							1.41315	1.71589	0.330914	0.782446	1.48493	0.985803	1.24764	1.4566	0.342712	0.439618	0.944726	1.44776	1.25843	0.355871
Solyc03g113130.2.1		Y	Y	Y		Y	Y	Y	Y	Y	0	0	11.3614	15.0693	0.424266	0.591482	0.467864	0	6.42585	6.21746	1.79498	1.38195	3.31768	2.58007
Solyc03g113340.2.1							Y		Y		13.6605	12.9378	8.71408	6.69426	17.0767	15.5757	16.3753	16.9564	9.16754	7.72472	13.8875	13.9511	12.4127	12.3665
Solyc03g113350.2.1			Y			Y	Y	Y			1.60157	1.99043	4.08128	3.04284	2.22739	1.84017	1.87146	1.15781	5.8261	5.43243	0.850253	1.25034	7.09298	5.69394
Solyc03g113460.1.1						Y					4.33366	3.63769	3.19884	3.56447	5.62152	4.60041	4.8346	7.28302	3.68415	3.54835	3.40101	6.15297	3.14608	2.28351
Solyc03g113490.2.1			Y	Y			Y		Y		10.0805	13.4526	2.53701	3.62243	8.59138	10.1866	8.10965	11.2793	4.2839	3.54835	12.5649	11.6479	4.29011	5.96085
Solyc03g113510.1.1										Y	6.12365	5.07904	3.19884	3.04284	4.34872	4.27181	6.08224	5.00474	3.17008	3.17153	3.7789	3.81682	6.17775	6.58362
Solyc03g113540.2.1				Y			Y		Y	Y	25.9078	30.131	10.148	10.2877	24.8195	28.5883	29.6314	26.9659	11.4808	9.01218	26.6413	25.9609	28.2003	33.3926
Solyc03g113550.2.1				Y			Y		Y	Y	15.0736	12.5946	3.64006	3.79631	8.27318	10.5152	11.8526	12.7733	5.65474	5.36962	10.203	10.1343	8.0654	9.31197
Solyc03g113560.2.1				Y			Y		Y	Y	10.3631	9.98648	2.3164	3.18774	8.06105	7.68926	11.0728	9.59865	5.65474	4.55319	6.8965	9.44333	7.20738	7.88848
Solyc03g113620.2.1			Y	Y		Y	Y		Y		11.8705	11.4621	4.08128	3.62243	8.48531	7.29494	12.3204	8.66493	2.39898	3.64255	5.66835	6.71233	5.09093	4.00355
Solyc03g113710.2.1									Y		6.68891	7.48128	9.1553	12.635	5.40939	5.45478	6.08224	5.86377	4.88364	4.27058	4.8181	5.13296	7.03578	5.78291
Solyc03g113970.2.1							Y				5.84102	6.72629	4.6328	4.89753	8.69745	8.8065	10.7609	9.15046	4.19822	5.74644	10.0141	9.83817	6.17775	6.49465
Solyc03g114020.2.1				Y			Y		Y	Y	24.1178	22.6154	7.39042	6.66528	21.0011	22.6735	28.5397	21.5503	8.39644	8.03874	18.5166	19.4789	18.6477	17.9715
Solyc03g114090.1.1				Y			Y		Y	Y	0.28263	0.480449	3.08853	3.18774	0.636398	0.788642	1.24764	0.261442	0.771102	1.06764	0.850253	0.690975	0.743619	0.563463
Solyc03g114290.2.1			Y	Y		Y	Y				4.05103	4.87313	1.98549	1.30408	1.9092	3.02313	4.05482	4.03367	2.05627	1.78987	3.30654	5.03425	1.43004	1.98695
Solyc03g114310.2.1				Y			Y		Y	Y	49.9313	42.8286	8.05225	5.53508	34.6837	32.6629	45.8507	42.0548	9.25322	9.23199	22.6734	21.2228	23.9674	27.6393
Solyc03g114360.2.1			Y	Y		Y	Y	Y	Y	Y	0.18842	0.549085	12.1335	16.3444	0.318199	0.460041	0.623819	0.298791	2.74169	3.79956	1.0392	0.954204	4.63332	3.38078
Solyc03g114390.1.1				Y			Y				5.55839	5.90266	2.2061	2.49223	4.34872	3.74605	4.8346	6.12521	3.5128	2.2923	3.21207	5.65942	3.66089	3.67734
Solyc03g114460.2.1				Y		Y	Y		Y	Y	39.8509	38.985	151.559	122.235	30.7593	38.1834	32.7505	34.1368	96.559	99.448	31.0815	26.7177	72.703	62.2182
Solyc03g114560.2.1	Y	Y	Y	Y		Y	Y	Y		Y	7.81943	11.7367	2.09579	1.88367	1.37886	2.82597	5.92628	3.77223	1.62788	2.07249	2.55076	4.17875	0.972424	0.622775
Solyc03g114800.1.1	Y					Y	Y	Y	Y		8.47891	6.69197	10.2583	13.6493	3.71232	4.79757	2.96314	3.66019	10.367	13.4398	9.16384	10.1672	10.3535	13.2266
Solyc03g114830.2.1	Y	Y	Y	Y	Y	Y	Y				2.35525	1.85316	30.1132	27.2407	14.1068	14.327	5.14651	4.40716	23.2187	19.8142	7.9357	9.57494	27.2851	26.9869
Solyc03g114840.2.1		Y	Y	Y	Y	Y	Y	Y	Y	Y	0	0	66.0726	63.8418	0.106066	0.460041	0	0	10.8811	11.5243	0.472363	0.0987107	7.32178	5.54566
Solyc03g114860.2.1				Y							4.23945	4.0495	1.10305	1.59387	2.65166	2.69453	1.24764	2.16623	0.685424	1.03624	1.51156	2.23744	1.54444	3.79596
Solyc03g114890.2.1			Y	Y		Y	Y	Y	Y		14.0373	13.1437	2.53701	2.46325	7.53071	8.1493	7.9537	13.4829	1.97059	1.94688	9.35279	8.02847	2.63127	2.90628
Solyc03g114910.2.1	Y					Y	Y		Y		2.44946	2.40225	3.41945	4.63672	0.318199	1.77444	0.779774	0.933721	6.51152	6.15466	2.64523	0.954204	1.83045	2.37248
Solyc03g114970.2.1				Y			Y				47.2934	45.3681	21.1785	21.3579	43.6994	37.0662	47.7222	40.1873	33.5001	30.7105	51.4876	63.9646	31.8612	30.9312
Solyc03g115190.2.1										Y	0.847891	0.960899	1.54427	1.85469	0.954598	1.38012	0.467864	1.12047	2.14195	1.06764	1.79498	0.9213	0.915223	0.652431
Solyc03g115200.2.1				Y			Y		Y	Y	212.821	174.575	59.344	44.9761	200.147	175.407	202.429	166.688	68.8851	67.7326	152.951	146.98	111.943	110.795
Solyc03g115230.2.1				Y			Y		Y	Y	381.457	354.778	170.972	118.091	409.735	404.048	285.553	393.059	149.508	113.453	119.319	64.7213	414.024	400.948
Solyc03g115530.2.1								Y	Y		1.50736	1.02953	1.87518	1.50693	0.530332	0.854362	1.7155	1.30721	1.71356	1.28745	1.13367	1.34905	1.43004	2.37248
Solyc03g115770.2.1			Y								18.7478	16.7814	20.9579	21.9085	21.3193	21.4905	21.0539	22.2226	25.4463	25.8433	20.8784	18.4918	33.806	36.3582
Solyc03g115870.2.1			Y	Y		Y	Y	Y	Y		10.5515	11.0847	37.0624	42.6578	9.33384	9.00366	12.3204	8.62758	31.0154	38.3724	16.6272	22.8351	21.1645	27.6987
Solyc03g115880.1.1			Y	Y		Y	Y	Y	Y		2.35525	1.50998	4.5225	4.17304	1.37886	1.90589	2.18337	1.56865	2.91305	3.42274	3.1176	1.77679	3.9469	4.03321
Solyc03g115900.2.1			Y	Y		Y	Y		Y		158.838	140.36	30.775	37.1807	79.6559	84.8448	133.497	132.514	33.9285	41.7951	80.0183	106.443	44.5599	47.3012
Solyc03g116060.2.1		Y	Y	Y		Y	Y				91.8548	71.0036	16.9869	16.3734	31.1835	33.9116	46.7864	47.6571	14.4796	16.3287	41.2845	39.5501	20.3637	21.2337
Solyc03g116280.2.1			Y	Y		Y	Y		Y		2.07262	1.50998	0.441219	0.695507	1.591	1.51156	2.65123	1.15781	0.685424	0.753631	1.13367	0.9213	0.80082	0.593119
Solyc03g116320.2.1			Y	Y		Y	Y		Y	Y	8.3847	10.1581	0.882438	0.463672	7.42465	4.92901	10.6049	9.5613	1.79924	1.19325	4.25127	3.6852	2.97447	3.61803
Solyc03g116360.1.1				Y			Y				18.6536	16.1294	7.50072	7.56364	12.4098	13.9984	16.2193	17.3299	3.17008	2.85752	17.2885	17.3731	7.8938	9.6975
Solyc03g116390.2.1							Y		Y	Y	1.13052	0.960899	0.992743	0.492651	2.01526	2.03733	1.09168	1.606	0.42839	0.282612	1.98392	1.31614	1.14403	1.92764
Solyc03g116410.1.1				Y			Y	Y	Y	Y	3.20314	2.29929	0.551524	0.608569	3.50019	3.61461	2.80719	2.50237	0.342712	0.628026	2.92865	2.36906	1.48724	1.72005
Solyc03g116480.1.1			Y			Y		Y			1.69578	1.5443	0.441219	0.956323	1.06066	1.51156	1.55955	1.38191	1.28517	0.847835	0.37789	0.82259	0.629216	0.444839
Solyc03g116510.1.1			Y	Y				Y	Y		0.65947	0.480449	2.4267	1.68081	0.530332	0.525761	1.7155	0.298791	2.05627	2.19809	1.88945	0.987107	2.91727	1.33452
Solyc03g116530.2.1		Y	Y		Y	Y				Y	4.42787	3.67201	6.06676	5.651	10.3945	10.6467	5.92628	4.6686	7.19695	6.06045	5.95177	5.5278	12.5271	11.5658
Solyc03g116570.2.1				Y			Y				10.9284	10.3297	5.95646	4.86855	10.5006	9.85803	11.5407	11.6528	6.25449	4.8044	5.57388	4.47489	8.29421	7.44364
Solyc03g116590.2.1			Y	Y			Y				81.4917	76.4258	223.147	204.131	138.098	107.321	93.5729	77.6482	208.112	189.758	250.258	203.903	171.204	146.382
Solyc03g116660.2.1				Y			Y				4.14524	3.15724	1.87518	1.41999	2.54559	2.43165	4.67864	4.10837	1.5422	1.57007	3.87338	3.42197	3.08888	2.66904
Solyc03g116870.2.1			Y	Y		Y	Y		Y		3.7684	4.22109	0.882438	1.07224	2.01526	2.10305	3.1191	3.47344	1.02814	1.03624	0.472363	1.74389	1.48724	1.39383
Solyc03g116900.2.1			Y	Y		Y	Y	Y	Y		3.29735	4.49563	20.7373	16.8371	5.51545	5.19189	4.99055	4.40716	15.6791	14.9156	5.10152	5.65942	12.1839	10.3796
Solyc03g116910.2.1			Y			Y		Y			4.80471	4.08382	2.4267	2.14448	2.96986	3.22029	3.27505	3.43609	1.37085	1.03624	2.0784	1.54647	0.915223	1.27521
Solyc03g116990.1.1				Y			Y		Y	Y	1.8842	1.64725	0.330914	0.608569	2.33346	2.82597	3.43101	2.16623	1.11381	0.879237	2.83418	1.67808	1.54444	1.66073
Solyc03g117100.2.1			Y								4.33366	6.5547	8.27286	7.33181	7.95498	7.36066	5.92628	6.79749	8.56779	7.81893	9.35279	7.96267	11.9551	11.6844
Solyc03g117190.1.1				Y							2.07262	2.57384	7.28011	5.2163	3.28806	3.35173	3.58696	3.99633	5.48339	4.05077	3.7789	3.32326	4.97652	2.81732
Solyc03g117230.1.1				Y		Y	Y		Y		18.6536	18.463	52.2845	40.1945	22.0618	18.1388	17.311	16.0973	49.6075	43.7106	25.4131	18.5576	33.5772	35.9134
Solyc03g117290.1.1				Y							29.2051	29.4104	66.7344	63.6969	39.7749	34.4374	37.2732	32.4561	42.2392	40.3821	34.388	32.5745	50.2801	50.7117
Solyc03g117300.2.1										Y	30.1472	29.2731	57.5791	50.3084	29.6986	26.4195	34.622	30.626	27.5026	32.1235	25.98	28.4287	25.0542	27.7283
Solyc03g117340.1.1									Y		5.55839	3.84359	5.95646	6.05671	3.28806	2.43165	5.45842	3.77223	5.14068	4.36478	6.32966	7.89686	4.1757	5.30841
Solyc03g117600.2.1				Y		Y	Y		Y		29.9588	28.1406	105.672	99.9792	40.8356	39.1692	22.9254	28.7586	69.9989	82.083	67.8313	63.2078	62.2352	51.72
Solyc03g117720.2.1							Y		Y	Y	1.22473	1.30408	0.661829	0.666528	2.01526	0.985803	1.40359	1.34456	0.942457	1.09905	1.70051	1.05291	1.25843	1.54211
Solyc03g117890.2.1									Y		8.57312	10.261	15.4427	15.1273	6.36398	7.8207	9.82515	8.96372	13.7941	12.1209	6.32966	7.04137	12.7559	11.0617
Solyc03g117980.2.1				Y			Y		Y	Y	4.05103	5.11335	18.9724	22.9807	4.56086	6.1777	2.96314	5.56498	13.1087	13.4398	5.38494	8.91687	9.09503	7.7402
Solyc03g118160.1.1				Y							301.849	279.622	593.44	597.586	501.694	404.573	315.341	337.185	665.461	625.703	370.521	336.011	418.657	372.805
Solyc03g118310.2.1		Y	Y			Y					34.0098	29.0329	14.4499	19.5032	14.7432	15.5757	27.76	22.1105	8.48212	9.01218	21.2563	19.7751	10.9827	13.1969
Solyc03g118370.2.1				Y			Y		Y		6.02944	6.14289	13.7881	15.8518	8.06105	6.96634	7.48583	6.53605	16.9642	17.8045	9.73068	8.2588	10.6395	10.7355
Solyc03g118410.2.1			Y							Y	56.8087	54.531	47.6517	55.4667	29.2743	32.9258	50.3734	37.797	41.8965	39.2516	37.1277	38.1682	23.853	25.0889
Solyc03g118470.2.1			Y								5.18155	6.3488	3.52975	4.81059	2.86379	3.35173	5.14651	4.7433	3.08441	3.26574	3.68443	3.58649	2.57406	2.96559
Solyc03g118540.2.1			Y	Y		Y	Y		Y		14.4141	12.8005	48.5341	46.0194	23.2285	22.3449	14.9717	12.3998	47.7226	49.9281	15.6824	15.2015	38.2106	36.1506
Solyc03g118770.2.1			Y							Y	4.89892	6.03993	4.5225	4.66569	2.43953	3.22029	4.99055	3.51079	0.771102	1.09905	4.15679	3.48778	1.94485	2.28351
Solyc03g118780.2.1							Y				641.947	578.53	328.377	283.999	586.759	584.581	584.675	688.376	285.736	289.426	585.636	554.656	395.262	369.365
Solyc03g119060.2.1		Y	Y	Y		Y	Y		Y	Y	7.25417	8.95695	0.882438	0.840405	1.48493	3.22029	6.5501	3.73488	1.19949	1.09905	3.68443	4.04714	1.43004	1.98695
Solyc03g119080.2.1				Y							37.7782	46.4663	20.0755	21.9375	28.4258	42.7838	34.1541	37.9838	21.6765	26.2201	39.6785	46.4928	23.9674	23.8137
Solyc03g119150.2.1		Y	Y	Y		Y	Y				3.48577	4.0495	0.551524	1.18816	1.06066	1.44584	3.43101	1.97949	1.19949	1.78987	0.755781	1.97421	1.08683	1.0083
Solyc03g119520.2.1			Y	Y		Y	Y	Y	Y		8.47891	8.68241	18.09	18.7497	7.84891	8.87222	9.35729	7.73121	19.2775	17.4591	12.5649	13.8853	17.1604	17.6749
Solyc03g119530.2.1		Y	Y	Y	Y	Y	Y		Y	Y	32.6909	25.8413	672.638	531.165	104.475	93.4541	45.3828	28.2731	361.39	352.637	191.59	167.841	199.747	167.141
Solyc03g119600.1.1				Y			Y		Y	Y	4.80471	5.86835	2.2061	1.82571	7.10645	6.37486	7.79774	4.70595	6.08313	5.11841	3.1176	4.24456	5.83455	4.65598
Solyc03g119860.2.1			Y			Y				Y	3.48577	4.427	3.08853	3.07182	2.33346	2.43165	2.96314	2.76381	4.19822	3.57975	3.87338	4.70521	1.43004	1.18624
Solyc03g120100.2.1				Y							1.31894	1.95612	4.08128	4.25998	2.33346	2.30021	2.49528	2.16623	4.19822	2.54351	2.36181	2.43486	2.40246	3.20284
Solyc03g120110.2.1				Y			Y		Y		0.847891	1.30408	0.22061	0.405713	0.530332	1.70872	1.87146	1.6807	0.42839	0.376816	0.283418	1.11872	0.572014	1.09727
Solyc03g120320.1.1										Y	0.847891	1.06385	1.87518	1.56489	1.16673	1.05152	1.55955	1.12047	0.685424	0.816434	0.850253	1.28324	1.08683	0.326215
Solyc03g120330.1.1							Y				2.63788	1.95612	4.6328	3.59345	2.96986	2.36593	2.96314	1.41926	3.5128	3.01453	1.60603	1.64518	3.20328	2.2242
Solyc03g120360.1.1							Y		Y		4.80471	4.80449	7.16981	6.54936	3.39412	2.10305	2.65123	3.66019	4.62661	4.64739	11.998	12.7008	4.0041	5.81257
Solyc03g120390.2.1										Y	1.13052	2.02475	3.30914	2.69509	3.07593	2.56309	2.33932	2.42767	2.05627	2.54351	1.13367	1.64518	1.25843	1.51245
Solyc03g120410.1.1				Y			Y		Y		7.91364	9.84921	2.4267	2.66611	7.10645	5.32333	7.01797	7.50712	3.08441	3.29714	7.55781	7.27169	4.51891	4.68564
Solyc03g120530.2.1				Y			Y			Y	4.42787	3.98087	1.10305	1.62285	3.50019	2.36593	3.58696	3.66019	1.28517	1.22465	4.25127	4.34327	3.37488	2.66904
Solyc03g120620.2.1			Y	Y			Y				34.3867	38.8134	10.9202	12.751	16.8646	21.6877	26.5123	24.3888	15.7647	15.7635	15.3046	15.1356	15.4444	16.9335
Solyc03g120640.2.1			Y								101.37	92.4179	48.7547	49.6418	79.3377	64.8001	79.537	81.6819	37.2699	39.1574	57.1559	66.6956	42.6151	46.6785
Solyc03g120710.2.1				Y			Y				73.9549	59.4385	24.8186	26.3423	36.9111	40.6808	60.5105	58.1148	31.3581	30.2395	40.0564	40.7675	39.2974	43.7129
Solyc03g120830.2.1				Y			Y		Y	Y	1.60157	1.02953	5.40493	4.17304	1.48493	0.920083	0.779774	0.896372	3.59847	2.19809	2.64523	1.8097	1.37283	1.24555
Solyc03g120870.2.1				Y			Y		Y	Y	13.6605	10.8787	46.328	40.89	20.3647	13.2098	14.9717	11.2793	29.0448	28.3868	27.586	24.1512	12.5271	12.2479
Solyc03g120890.2.1				Y			Y		Y		5.93523	6.14289	3.75036	2.31836	6.68218	5.12617	6.08224	6.08786	2.99873	3.17153	4.44021	4.37618	4.69052	4.53736
Solyc03g120930.1.1									Y		9.13838	7.96173	5.95646	5.47712	16.5464	16.7586	10.9168	9.97214	1.5422	2.07249	13.2262	12.5034	13.4423	8.98575
Solyc03g120970.2.1				Y			Y		Y	Y	3.39156	3.39746	1.43396	1.21714	3.60626	3.02313	2.49528	3.47344	1.28517	1.85268	2.55076	2.50067	2.17365	3.88493
Solyc03g120990.2.1						Y					19.0304	17.9482	23.8258	27.2117	23.8649	23.9879	14.8157	14.6034	30.1586	31.2129	32.6875	25.3687	29.5731	29.6263
Solyc03g121060.2.1				Y			Y		Y	Y	22.422	22.9586	91.222	102.066	16.8646	17.7444	18.8705	19.4214	52.4349	47.3218	32.593	28.9222	30.1452	31.1684
Solyc03g121090.2.1				Y			Y		Y	Y	0.847891	0.995217	4.74311	5.88283	1.16673	0.525761	2.18337	1.23251	3.34144	4.8986	1.13367	2.23744	1.48724	0.889678
Solyc03g121100.2.1			Y	Y		Y	Y	Y	Y	Y	0.18842	0.686356	10.8099	6.81018	0.530332	0.920083	0.467864	0.224093	6.76856	5.55803	2.45629	1.67808	3.71809	2.758
Solyc03g121170.2.1		Y	Y	Y			Y		Y	Y	15.3562	16.5755	1.10305	1.53591	5.62152	8.4779	7.17392	9.26251	1.19949	1.72707	5.10152	5.88974	3.66089	4.86358
Solyc03g121270.2.1			Y	Y		Y	Y				21.7625	25.807	61.3295	52.1341	30.0168	27.9968	26.0445	22.7081	61.6881	54.5755	59.4233	51.0006	59.6611	55.9608
Solyc03g121300.2.1			Y						Y	Y	3.39156	3.56905	3.75036	5.3612	1.48493	2.10305	3.89887	2.31563	1.88491	2.10389	1.79498	3.84972	1.08683	2.07592
Solyc03g121350.2.1				Y			Y		Y	Y	2.07262	2.53952	10.9202	10.9253	1.37886	2.56309	2.02741	2.24093	4.88364	4.39618	3.7789	3.75101	4.0613	2.78766
Solyc03g121550.2.1				Y					Y		4.7105	5.90266	11.4717	11.7657	5.51545	5.71766	5.77033	6.87219	9.42457	6.43727	6.14072	6.77814	5.77734	7.32502
Solyc03g121600.2.1				Y					Y		671.906	673.281	268.592	296.518	552.182	615.47	561.593	567.852	280.852	278.812	510.435	498.654	438.449	467.259
Solyc03g121660.2.1			Y	Y			Y		Y		18.7478	19.5612	7.16981	6.31752	11.6673	14.4584	16.8431	14.6781	6.42585	5.08701	18.2332	15.8595	7.77939	8.89678
Solyc03g121780.1.1				Y			Y		Y	Y	1.31894	2.02475	6.9492	4.43386	0.424266	1.38012	2.02741	0.933721	0.771102	0.72223	2.92865	0.493554	2.05925	2.37248
Solyc03g121790.2.1				Y			Y		Y	Y	4.61629	4.59859	39.82	33.2974	6.25792	4.53469	4.8346	5.78907	7.45398	5.90345	7.65228	4.04714	5.83455	5.18979
Solyc03g121900.1.1	Y	Y	Y	Y		Y		Y		Y	9.70364	7.54992	2.64731	3.76733	6.15185	2.23449	4.36673	2.91321	3.08441	3.48555	13.5096	14.1485	0.80082	1.36417
Solyc03g122170.2.1									Y	Y	1.03631	1.75021	3.52975	2.52121	1.2728	1.57728	2.65123	1.41926	1.71356	1.22465	1.60603	1.61228	1.60164	1.18624
Solyc03g122190.2.1			Y	Y		Y	Y	Y	Y		14.4141	17.2962	64.418	67.1454	24.0771	22.8706	18.8705	18.413	83.4503	75.9284	41.6624	46.1966	76.5355	61.2692
Solyc03g122340.2.1		Y	Y	Y		Y	Y				121.343	125.329	485.451	509.807	288.501	258.938	142.543	164.746	842.129	916.51	279.355	313.769	500.112	421.322
Solyc03g123430.2.1						Y				Y	103.819	101.649	171.083	151.939	102.566	91.3511	126.479	124.969	92.7035	87.327	147.472	135.003	53.4833	57.4436
Solyc03g123540.2.1				Y			Y		Y	Y	12.8126	14.8939	3.08853	1.50693	13.0462	10.5809	11.5407	10.9432	2.14195	1.63287	3.1176	1.38195	12.5271	11.3879
Solyc03g123560.2.1				Y						Y	51.6271	60.7082	28.6792	24.2268	43.169	58.8196	44.759	54.4546	28.1024	23.3626	25.1297	25.3029	65.3812	60.9726
Solyc03g123610.2.1				Y			Y		Y		45.7861	48.5597	118.136	125.684	44.3358	46.727	45.2269	39.4777	81.137	87.17	61.8795	51.6257	81.7408	78.44
Solyc03g123670.2.1		Y	Y	Y	Y	Y	Y	Y		Y	1.13052	2.47088	5.07402	6.02773	5.30332	4.27181	2.80719	1.49395	15.3364	14.9156	3.1176	2.92842	14.7008	15.6583
Solyc03g123680.1.1			Y	Y		Y		Y			0.75368	0.823627	1.43396	1.79673	1.2728	1.643	0.779774	0.896372	3.42712	3.83096	0.850253	1.11872	2.86007	3.52906
Solyc03g123710.2.1			Y	Y		Y	Y		Y		6.78312	6.10857	1.65457	1.62285	4.77299	3.81177	5.92628	7.20833	2.14195	1.85268	1.70051	1.25034	3.20328	2.96559
Solyc03g123830.2.1				Y			Y		Y		310.893	295.442	124.203	125.713	261.772	299.421	274.636	294.234	162.617	172.299	242.983	260.333	227.376	208.808
Solyc04g005050.1.1				Y							8.00785	6.89788	3.41945	3.68039	6.57612	5.58622	8.73347	5.97581	5.22635	4.42758	7.17992	5.75813	4.34731	4.53736
Solyc04g005060.2.1		Y									6.31207	8.64809	4.96371	5.53508	3.60626	2.76025	4.99055	4.93005	3.85551	4.52179	4.44021	5.10006	5.03373	4.80426
Solyc04g005100.2.1			Y	Y		Y	Y	Y	Y		5.36997	5.04472	1.21335	1.15918	6.04579	3.41745	5.30246	5.60233	0.599746	0.533822	2.45629	3.45488	1.88765	1.80901
Solyc04g005140.2.1									Y		1.78999	1.61294	2.2061	1.85469	0.742465	0.788642	1.09168	1.5313	2.05627	1.91548	1.79498	0.9213	1.83045	1.21589
Solyc04g005180.2.1		Y			Y						3.7684	5.07904	2.75762	2.55019	1.69706	2.62881	3.89887	4.818	4.11254	2.60631	1.60603	3.29036	3.54649	4.2408
Solyc04g005320.2.1		Y	Y	Y	Y	Y	Y	Y	Y		0.0942101	0.171589	15.1118	19.1844	1.37886	1.77444	0	0.112047	40.2686	37.6502	0.283418	0.361939	12.0123	9.99405
Solyc04g005380.2.1							Y				13.7547	14.1389	7.39042	8.6069	16.6524	11.2382	16.2193	19.4961	6.42585	5.68364	13.1317	13.5892	9.38103	11.4175
Solyc04g005780.1.1									Y		2.16683	2.16202	1.98549	1.21714	3.28806	2.82597	3.27505	2.46502	2.57034	1.60147	2.83418	2.56648	2.23086	3.26215
Solyc04g005910.2.1		Y	Y	Y		Y	Y		Y	Y	14.2257	16.4039	1.21335	1.82571	5.19725	8.08358	12.3204	10.7565	0.257034	0.690829	10.203	11.5492	3.03168	4.00355
Solyc04g006940.2.1			Y	Y					Y		1.41315	2.40225	6.28737	4.14406	2.54559	2.23449	1.7155	2.91321	8.56779	7.31651	3.02312	2.59938	4.69052	3.91459
Solyc04g006970.2.1						Y					21.1031	22.5468	24.0464	23.4154	24.8195	19.256	21.0539	28.6839	16.0218	18.3698	38.0724	43.696	10.2963	14.0273
Solyc04g007150.2.1			Y	Y		Y	Y	Y	Y	Y	0.56526	0.514767	6.39768	7.27385	0.742465	1.11724	0.935729	0.821674	2.65602	1.82128	1.41709	2.27035	1.83045	2.10557
Solyc04g007200.2.1			Y								5.18155	6.38311	3.41945	3.18774	4.45479	3.08885	3.74292	3.69753	0.771102	0.753631	1.88945	3.15874	2.80287	2.37248
Solyc04g007340.2.1				Y			Y		Y		6.21786	6.00562	15.2221	11.6787	5.40939	5.8491	6.39415	6.46135	13.023	13.377	8.40806	10.8911	6.40656	7.53261
Solyc04g007350.2.1									Y		5.36997	4.15246	3.86067	3.56447	9.12171	5.98054	5.61437	4.6686	5.055	5.27542	4.44021	5.16586	3.9469	6.40569
Solyc04g007360.1.1		Y									2.07262	3.60337	1.65457	1.82571	1.80313	1.11724	1.7155	1.86744	1.45653	1.82128	3.49549	3.19165	1.71604	2.66904
Solyc04g007390.2.1		Y	Y	Y		Y					2.73209	3.60337	0.882438	1.53591	1.16673	1.90589	2.49528	2.42767	0.685424	0.628026	1.60603	1.02001	0.915223	0.830367
Solyc04g007790.2.1		Y	Y	Y	Y	Y	Y	Y	Y		0.56526	0.892263	5.73585	5.56406	1.591	1.97161	0.31191	0.746977	5.91178	5.96625	0.37789	0.954204	6.00615	7.26571
Solyc04g007870.2.1		Y	Y	Y	Y	Y	Y				4.14524	5.66244	0.661829	1.39101	1.16673	1.77444	4.05482	3.54814	1.37085	1.06764	2.92865	4.5736	1.60164	1.39383
Solyc04g007940.2.1			Y			Y					1.50736	0.995217	1.43396	1.2751	1.48493	1.643	1.09168	1.15781	0.42839	0.565224	0.755781	1.11872	2.23086	2.63938
Solyc04g007950.2.1			Y	Y		Y	Y				8.19627	5.55949	1.54427	2.31836	4.45479	3.02313	8.2656	5.37823	3.42712	2.76332	6.61308	5.98845	2.00205	2.16488
Solyc04g008060.2.1							Y		Y		5.55839	4.56427	9.04499	6.17263	3.81839	2.56309	4.52269	2.50237	9.3389	9.01218	2.17287	3.29036	3.8325	3.61803
Solyc04g008150.1.1							Y		Y	Y	1.03631	1.13249	0.22061	0.637548	0.742465	1.57728	1.09168	1.19516	1.5422	1.00484	0.661308	1.05291	1.31563	1.09727
Solyc04g008330.1.1				Y			Y		Y	Y	10.3631	11.9426	22.8331	24.3717	7.00038	7.22922	5.77033	6.57339	21.5052	19.7828	8.9749	10.1672	12.2983	10.4092
Solyc04g008450.2.1			Y		Y	Y		Y		Y	7.25417	9.84921	9.04499	8.7518	11.243	19.256	7.32988	7.69386	47.9796	37.2734	9.73068	7.20588	81.3404	75.504
Solyc04g008570.2.1				Y							17.1462	20.2475	7.94194	9.04159	12.1976	13.5384	14.0359	18.0395	10.1957	10.017	8.9749	13.1285	11.7263	14.4128
Solyc04g008830.1.1				Y			Y		Y	Y	7.44259	9.67762	3.86067	3.79631	8.59138	8.60934	8.10965	9.74805	5.8261	6.28026	6.70755	5.16586	7.72219	8.03676
Solyc04g009030.2.1			Y	Y		Y					241.931	217.266	92.3251	107.717	137.25	129.995	182.311	175.39	87.0488	97.6895	101.558	127.501	79.4528	85.5871
Solyc04g009180.1.1							Y				58.316	54.3251	37.1727	25.0093	65.0187	49.8816	64.5653	58.7871	31.6152	25.7177	43.0795	41.4914	41.185	44.8695
Solyc04g009420.2.1		Y									5.27576	8.61377	4.96371	4.69467	2.96986	3.35173	6.70606	4.818	2.57034	3.01453	5.10152	4.34327	4.0613	3.61803
Solyc04g009440.2.1				Y							1.69578	1.09817	2.86792	2.49223	1.591	1.24868	2.18337	1.56865	1.5422	1.66427	2.36181	2.27035	1.83045	1.15658
Solyc04g009630.2.1				Y							9.42101	10.1924	3.52975	5.04243	7.95498	8.87222	10.1371	8.36614	5.22635	6.02905	7.27439	8.06138	5.77734	7.53261
Solyc04g009810.2.1									Y		9.42101	10.9131	14.3396	15.0114	7.31858	6.37486	8.73347	7.50712	9.3389	10.9277	8.21911	6.38329	9.32383	8.71885
Solyc04g009820.2.1										Y	326.438	307.453	500.342	500.678	377.596	317.954	343.724	364.188	163.474	166.553	353.611	305.806	190.023	168.891
Solyc04g009880.1.1								Y			1.8842	2.60815	1.76488	2.08652	2.43953	2.76025	0.935729	2.42767	1.19949	1.00484	0.755781	1.11872	1.48724	0.94899
Solyc04g009900.2.1				Y			Y		Y		35.6114	28.2779	11.9129	10.9832	28.4258	25.3023	44.1352	38.0585	15.8504	15.261	23.4292	23.3944	19.2197	22.0047
Solyc04g009960.2.1		Y	Y	Y							25.9078	24.5716	8.05225	9.93996	9.43991	9.85803	17.4669	18.2636	8.73915	9.26339	11.2422	9.04848	10.1819	10.4092
Solyc04g010040.2.1				Y			Y		Y	Y	9.42101	7.75583	2.2061	2.78203	11.0309	9.59515	10.6049	8.36614	4.19822	3.95657	5.38494	5.88974	8.46581	7.05812
Solyc04g010320.1.1			Y			Y	Y	Y	Y		4.14524	4.01518	8.27286	7.56364	1.80313	3.68033	2.49528	3.43609	10.11	10.0484	2.0784	1.57937	11.4403	10.3499
Solyc04g010330.2.1		Y	Y	Y	Y	Y	Y				10.6457	5.73107	27.4659	28.7187	30.9714	27.0767	11.5407	7.84326	52.6919	47.4788	17.9498	18.1957	55.0278	49.911
Solyc04g011440.2.1				Y			Y		Y	Y	240.801	232.606	60.0058	18.6338	423.311	317.428	241.73	369.156	62.1165	28.0728	63.1077	28.3958	340.177	315.332
Solyc04g014260.1.1				Y							17.3347	13.1437	45.6662	31.7615	27.4712	21.1619	26.3564	16.3961	34.6139	32.2177	29.0976	26.0267	24.997	25.771
Solyc04g014360.2.1			Y					Y		Y	10.0805	9.26581	5.07402	6.57834	10.1824	8.93794	11.8526	9.18781	20.3914	14.6016	11.3367	14.3131	18.8765	19.6322
Solyc04g014480.2.1				Y			Y		Y	Y	16.581	16.5755	8.05225	3.44856	21.2133	19.8475	18.5586	23.8659	5.99746	2.85752	4.72363	3.6852	17.8468	13.701
Solyc04g014510.2.1			Y	Y		Y	Y	Y	Y		0.28263	0.78931	2.4267	1.44897	0.424266	0.788642	1.09168	0.33614	5.48339	4.49039	0.0944726	0.263229	3.43209	3.02491
Solyc04g014540.1.1			Y	Y	Y	Y	Y	Y	Y		2.07262	2.5052	12.7954	13.2436	5.19725	4.40325	2.02741	2.09153	27.0742	26.9423	2.45629	3.6523	15.2728	14.6204
Solyc04g014600.2.1			Y	Y		Y	Y		Y	Y	5.84102	7.61855	0.441219	0.260815	5.62152	4.99473	7.9537	7.50712	0.771102	0.376816	1.79498	1.34905	2.17365	3.2325
Solyc04g014640.1.1		Y	Y	Y			Y				0.56526	0.514767	2.53701	3.85427	2.33346	1.18296	2.02741	0.97107	1.02814	1.50726	2.7397	2.33615	1.43004	1.86832
Solyc04g014740.1.1				Y							3.39156	2.84838	0.882438	1.44897	1.80313	2.03733	2.49528	2.57707	1.71356	2.07249	3.30654	2.92842	2.23086	2.34282
Solyc04g014750.1.1			Y							Y	6.68891	7.34401	8.49347	6.66528	5.40939	5.32333	7.48583	5.15414	7.88237	6.37447	4.8181	6.25168	3.71809	3.38078
Solyc04g014760.2.1				Y							28.9225	28.5181	14.6705	13.3016	18.0313	19.256	22.4575	22.6707	8.82483	9.38899	21.3508	21.157	15.7876	15.9549
Solyc04g014800.2.1				Y			Y		Y		2.16683	2.1277	6.8389	4.89753	3.07593	2.43165	2.33932	1.6807	3.59847	3.92516	1.51156	1.48066	2.86007	3.20284
Solyc04g014900.2.1			Y	Y		Y	Y		Y		2.26104	2.26498	0.551524	0.55061	1.69706	1.44584	1.55955	2.20358	0.599746	0.785033	1.88945	1.77679	0.915223	0.800711
Solyc04g014960.2.1						Y					2.63788	2.57384	1.43396	1.73877	1.9092	1.51156	4.8346	2.31563	1.19949	1.25605	1.88945	2.46777	1.43004	1.39383
Solyc04g015360.2.1				Y							7.81943	7.92741	4.30189	3.73835	4.24266	4.07465	4.36673	4.10837	2.22763	2.4179	2.92865	2.86261	5.60574	4.30011
Solyc04g015540.1.1				Y			Y		Y	Y	2.35525	3.43178	1.21335	0.840405	2.75773	2.69453	2.80719	3.02526	0.514068	0.659428	2.17287	2.99423	2.00205	2.10557
Solyc04g015560.2.1				Y							10.9284	11.9083	23.4949	26.2844	16.8646	17.613	13.4121	16.0973	21.9336	20.191	19.5558	19.5447	18.0757	15.8066
Solyc04g015850.2.1				Y			Y				14.6026	14.2762	5.73585	5.5061	9.65204	8.34646	14.1919	10.7565	7.62534	8.98077	5.95177	8.71945	8.46581	9.46025
Solyc04g015970.2.1			Y			Y		Y			41.7351	35.7248	45.1147	47.3235	38.29	44.5583	35.5577	35.5187	63.4017	68.7375	34.1046	37.181	91.0647	86.2692
Solyc04g016250.2.1				Y			Y		Y		1.22473	1.47567	4.08128	3.5355	1.2728	1.97161	1.09168	1.41926	2.39898	1.97828	1.22814	1.31614	1.94485	1.80901
Solyc04g016400.2.1				Y							8.47891	10.8101	19.5239	20.6044	15.4857	14.8528	12.9442	13.5203	15.5934	16.4543	16.2493	18.7221	14.472	15.1542
Solyc04g016430.2.1		Y	Y		Y	Y			Y	Y	0.28263	0.823627	1.10305	0.869384	3.07593	5.12617	0.779774	1.00842	2.3133	3.61115	3.1176	4.34327	4.23291	4.83392
Solyc04g017720.2.1				Y			Y			Y	4.23945	3.67201	13.1263	8.63588	4.03052	6.44058	4.52269	3.62284	3.25576	2.82612	7.46333	6.77814	3.37488	4.35942
Solyc04g025510.2.1				Y			Y		Y	Y	4.23945	5.73107	11.9129	15.1563	3.71232	2.69453	4.36673	4.93005	8.48212	6.78268	6.14072	7.73234	5.03373	4.41874
Solyc04g025610.1.1		Y	Y								0.942101	0.549085	0.772133	0.985302	1.80313	1.77444	0.623819	0.859023	1.37085	0.847835	0.755781	0.789686	1.20123	1.69039
Solyc04g025650.2.1			Y	Y							28.263	30.4399	13.6778	13.2146	19.7284	20.5704	20.742	25.1358	9.08186	10.3624	27.586	33.0023	13.0419	15.4804
Solyc04g026110.2.1				Y			Y				17.8057	17.056	6.8389	7.85344	11.137	13.2098	16.5312	15.5745	5.65474	7.0967	9.73068	13.2272	9.89585	11.0617
Solyc04g026130.1.1				Y			Y		Y	Y	1.69578	1.13249	3.19884	3.5355	1.2728	0.591482	2.33932	1.30721	1.37085	1.91548	2.55076	2.86261	1.71604	1.24555
Solyc04g040220.2.1				Y			Y		Y	Y	21.4799	22.2723	7.16981	10.8963	32.6685	30.8228	29.7874	29.8417	55.1766	55.0465	39.3951	36.3256	40.4414	43.4756
Solyc04g045560.2.1		Y	Y	Y			Y				4.89892	4.90745	14.5602	16.6342	12.5158	9.06939	7.9537	6.08786	17.9924	18.0558	14.8322	13.5892	12.9847	13.1672
Solyc04g048900.2.1			Y			Y		Y		Y	1.31894	2.02475	1.87518	2.20244	1.2728	1.38012	0.779774	1.26986	4.45525	5.96625	1.0392	1.64518	4.0041	4.47805
Solyc04g049080.2.1			Y	Y		Y	Y				2.73209	3.22587	1.32366	0.898364	2.12133	1.97161	2.18337	2.20358	0.42839	0.502421	0.944726	1.94131	1.37283	0.800711
Solyc04g049090.2.1			Y	Y		Y	Y	Y	Y		8.19627	11.1533	3.19884	2.57917	7.21252	9.85803	11.5407	8.81433	2.65602	2.57491	5.57388	8.62074	3.77529	4.47805
Solyc04g049190.1.1			Y						Y	Y	4.89892	5.11335	3.41945	3.2457	8.59138	9.39799	5.92628	6.31195	2.91305	3.04593	5.76283	7.30459	9.95305	14.5018
Solyc04g049800.2.1		Y	Y	Y	Y	Y	Y	Y	Y		10.3631	11.119	0.551524	0.782446	3.18199	2.69453	7.32988	7.9553	0.42839	0.72223	3.49549	3.55359	0.80082	1.39383
Solyc04g049920.2.1				Y			Y		Y	Y	15.9215	16.4382	79.7503	75.4336	12.9401	14.5899	14.9717	10.2709	18.3351	18.935	15.7769	12.4046	18.6477	19.395
Solyc04g050050.2.1						Y		Y		Y	2.73209	2.98565	5.40493	5.47712	4.13659	2.69453	4.52269	3.69753	2.82737	1.97828	3.96785	3.91553	1.54444	1.39383
Solyc04g050440.2.1		Y	Y	Y		Y	Y	Y	Y	Y	10.7399	7.44697	0.330914	0.231836	4.03052	2.43165	4.67864	4.85535	0.342712	0.345414	3.49549	3.02713	0.915223	0.94899
Solyc04g050730.2.1		Y	Y	Y		Y	Y		Y	Y	4.52208	4.25541	0.22061	0.318774	1.37886	2.43165	5.30246	2.12888	0.257034	0.125605	1.0392	1.67808	1.25843	1.57177
Solyc04g050790.2.1							Y				5.93523	7.75583	11.8026	11.6208	5.62152	7.88642	3.89887	5.41558	9.25322	8.76097	9.35279	7.66653	8.0082	5.33807
Solyc04g050960.2.1										Y	106.74	116.131	188.842	208.333	102.566	99.106	116.966	116.752	95.5309	108.586	126.688	137.833	84.3149	101.127
Solyc04g050990.2.1										Y	1.8842	1.95612	4.30189	3.07182	2.43953	2.49737	2.18337	2.01684	1.79924	2.13529	1.98392	1.48066	1.31563	1.63108
Solyc04g051540.2.1						Y					13.2836	12.8349	15.1118	15.0403	13.7886	14.327	10.293	11.242	16.8786	16.1717	20.4061	20.6634	23.853	25.771
Solyc04g051630.1.1			Y			Y		Y		Y	1.22473	0.549085	0.110305	0.869384	0.636398	0.657202	1.40359	0.485535	0.599746	1.06764	0.755781	0.888397	2.11645	2.2242
Solyc04g054310.2.1			Y	Y							33.633	34.1462	16.9869	16.7791	20.2587	22.4763	29.9433	27.0779	11.2238	11.9325	13.8875	15.1686	17.332	16.6073
Solyc04g054340.1.1			Y	Y		Y	Y	Y	Y	Y	0.47105	0.583403	3.30914	4.66569	0.424266	0.591482	0.155955	0.149395	1.79924	3.04593	0.283418	1.28324	1.54444	1.92764
Solyc04g054730.2.1			Y	Y		Y	Y	Y	Y		0.37684	0.171589	6.50798	5.18733	0	0.394321	0	0.112047	11.5665	6.81408	0.0944726	0.0329036	3.71809	2.84697
Solyc04g054740.2.1						Y					17.052	17.0216	14.7808	18.1701	12.0916	15.6414	24.017	22.5213	5.8261	6.21746	17.5719	20.828	8.23701	10.7948
Solyc04g054790.1.1			Y							Y	6.5947	5.49085	5.40493	6.98405	4.66692	3.87749	4.52269	4.9674	1.45653	2.54351	7.36886	6.90975	2.23086	3.35112
Solyc04g054800.2.1			Y			Y		Y		Y	161.382	159.097	236.493	210.536	172.04	156.085	201.806	193.318	61.7738	61.1384	216.153	199.823	72.5314	76.7496
Solyc04g054930.2.1		Y	Y		Y	Y					6.68891	6.45175	3.86067	4.95549	2.75773	2.10305	5.61437	5.15414	3.08441	2.85752	3.49549	5.16586	2.80287	2.52076
Solyc04g054990.2.1			Y	Y		Y	Y	Y	Y		25.9078	20.2818	116.923	110.789	28.744	22.0163	25.4206	17.6287	70.4273	73.5419	82.758	78.2776	54.8562	60.6464
Solyc04g055050.1.1										Y	14.2257	13.178	10.3686	10.0559	19.9405	19.1903	15.9074	16.06	21.2481	16.9881	13.0372	14.5434	22.0225	21.7378
Solyc04g055080.2.1			Y	Y		Y	Y				2.8263	2.5052	0.772133	1.1302	1.37886	2.23449	2.49528	2.24093	0.514068	0.502421	2.26734	1.8755	0.915223	1.09727
Solyc04g056580.2.1			Y			Y					7.25417	7.99605	5.62554	5.10039	4.77299	4.40325	5.45842	8.1047	4.19822	4.05077	3.87338	3.55359	3.31768	3.2325
Solyc04g057980.2.1		Y	Y			Y					1.60157	2.33361	1.21335	1.21714	0.954598	0.722922	2.65123	1.64335	1.88491	0.879237	1.79498	1.41485	0.40041	0.830367
Solyc04g058180.2.1							Y		Y	Y	11.3052	9.67762	17.8694	17.8514	5.83365	6.63774	6.08224	7.17098	12.2519	11.5871	9.06937	7.99557	7.951	8.4816
Solyc04g063210.2.1				Y		Y	Y	Y	Y		2.73209	2.57384	10.9202	7.70854	1.9092	2.76025	1.40359	2.12888	9.51025	7.72472	6.23519	6.12007	5.49134	4.59667
Solyc04g064610.2.1										Y	5.27576	7.48128	3.30914	4.02815	4.34872	6.63774	5.14651	4.9674	3.76983	3.39134	4.06232	3.98133	8.58021	6.82087
Solyc04g064620.2.1		Y	Y	Y	Y	Y	Y	Y	Y	Y	0.65947	0.514767	17.2075	13.2726	2.54559	2.49737	0.623819	0.597581	7.11127	7.94453	0.188945	1.15163	8.1798	5.66429
Solyc04g064770.1.1						Y				Y	1.31894	1.26976	0.551524	0.695507	1.16673	0.788642	0.623819	0.746977	0.42839	1.00484	0.755781	0.493554	1.71604	1.42349
Solyc04g064860.1.1							Y		Y	Y	1.41315	1.20112	0.772133	0.637548	1.37886	1.77444	2.33932	1.5313	1.19949	1.47586	2.36181	2.04002	1.31563	1.7497
Solyc04g064940.2.1				Y			Y		Y	Y	1.31894	1.64725	0.330914	0.260815	0.636398	1.77444	1.55955	1.94214	0.599746	0.942039	1.88945	1.34905	1.43004	1.15658
Solyc04g071070.2.1			Y	Y							168.353	184.801	58.5718	49.9316	89.52	102.984	94.9765	117.836	71.6268	76.3366	42.7016	53.3038	76.9931	63.1672
Solyc04g071340.2.1		Y	Y			Y					4.7105	4.70154	2.09579	2.63713	2.75773	2.03733	4.8346	4.29512	3.59847	2.60631	3.7789	2.92842	1.14403	1.45314
Solyc04g071360.2.1		Y	Y	Y		Y	Y	Y	Y	Y	7.15996	9.57467	0.661829	0.811425	3.92446	4.46897	7.9537	5.22884	0.856779	1.13045	3.49549	2.66519	1.54444	1.86832
Solyc04g071500.2.1				Y			Y		Y		97.8842	83.0491	40.8128	33.3843	80.9287	75.6439	99.8111	82.0927	61.5168	65.2519	83.2303	81.897	52.3393	58.6002
Solyc04g071540.2.1				Y							26.1904	25.1893	11.9129	12.4902	15.5918	15.97	18.5586	16.5082	11.4808	11.8069	11.4312	11.8782	15.1012	16.1921
Solyc04g071610.2.1		Y		Y			Y	Y		Y	0.942101	0.960899	2.86792	4.11508	2.54559	4.14037	2.65123	1.00842	1.02814	4.23918	3.30654	4.6065	0.858021	1.92764
Solyc04g071620.2.1				Y			Y		Y	Y	1.22473	1.75021	4.08128	5.41916	0.848531	3.41745	2.02741	1.5313	3.85551	5.49523	5.00705	8.35751	0.915223	1.30486
Solyc04g071650.2.1				Y							156.577	147.601	64.8592	67.0585	88.0351	92.8626	114.315	109.059	67.6856	70.5901	74.8223	80.548	79.4528	84.9643
Solyc04g071800.2.1			Y	Y		Y	Y	Y	Y		4.52208	4.18677	0.22061	0.492651	3.60626	4.33753	3.27505	4.85535	0.771102	1.47586	2.64523	7.96267	0.972424	0.830367
Solyc04g071820.2.1				Y			Y		Y	Y	0.65947	0.926581	2.53701	3.04284	0.636398	0.722922	0.467864	0.859023	0.42839	0.408217	0.755781	0.559361	0.514813	0.682087
Solyc04g071890.2.1				Y			Y		Y	Y	10.5515	10.8444	57.91	72.7964	11.4552	11.8296	12.3204	10.383	50.807	58.1866	30.3257	39.1882	17.2176	14.9763
Solyc04g071900.2.1	Y	Y	Y							Y	4.61629	4.70154	4.74311	3.47754	2.75773	1.70872	2.80719	2.01684	1.28517	2.04109	1.0392	2.33615	1.37283	2.28351
Solyc04g071990.2.1			Y	Y		Y		Y			27.9804	33.906	62.8737	67.5511	57.9123	63.2885	45.5388	48.3294	98.8723	99.9504	36.3719	51.198	138.656	113.167
Solyc04g072020.2.1		Y	Y	Y	Y	Y	Y	Y		Y	3.39156	4.73586	1.43396	2.02856	2.12133	1.70872	4.99055	3.62284	0.771102	1.35026	1.88945	2.7639	0.858021	0.771055
Solyc04g072030.1.1										Y	23.6467	18.9434	32.4296	38.2529	20.5769	19.6503	20.2741	22.8201	23.0474	31.1501	35.2383	47.2166	12.6415	17.7936
Solyc04g072160.2.1				Y			Y		Y	Y	225.822	247.397	129.939	89.3147	253.393	246.976	253.427	275.971	108.297	79.0999	82.3801	52.1522	272.851	228.647
Solyc04g072740.2.1			Y	Y		Y	Y				6.68891	8.71672	2.2061	3.15876	3.92446	5.98054	5.77033	8.47819	2.91305	3.73676	3.87338	6.35039	4.1757	2.96559
Solyc04g072760.2.1									Y	Y	1.8842	2.84838	3.86067	3.3906	0.954598	1.44584	2.49528	1.71805	2.99873	2.95172	2.17287	2.17164	1.43004	1.77936
Solyc04g072920.2.1			Y	Y							0.65947	0.446132	1.10305	2.34734	1.48493	0.920083	0.467864	1.34456	2.05627	2.07249	1.41709	0.658072	1.88765	2.52076
Solyc04g074080.2.1									Y		16.2041	16.9187	29.5617	34.1088	12.1976	14.0641	18.2467	15.7239	16.7929	17.0195	14.2654	18.9196	16.9316	18.0605
Solyc04g074120.2.1									Y		2.35525	2.91701	3.30914	3.73835	1.2728	1.77444	1.55955	2.20358	2.05627	2.26089	2.17287	3.22455	2.28806	2.0166
Solyc04g074310.2.1			Y			Y					22.0452	22.3752	11.4717	12.5481	14.9554	14.9842	21.6777	16.172	5.65474	4.08217	17.5719	17.3073	9.43824	8.51126
Solyc04g074640.2.1		Y	Y	Y							23.8351	21.7575	9.92743	10.1428	9.97024	9.00366	17.7788	15.8733	10.9668	9.98562	9.25831	11.3517	8.35141	9.51956
Solyc04g074700.2.1			Y	Y	Y	Y	Y	Y	Y		2.73209	1.61294	5.84615	7.09997	2.96986	3.02313	1.87146	1.00842	15.9361	12.9687	1.41709	1.31614	9.26663	8.57057
Solyc04g074730.1.1			Y	Y		Y	Y		Y		42.5829	42.3139	193.585	166.574	75.2011	57.6366	47.5662	35.8922	182.751	172.707	78.7901	72.1905	124.184	100.296
Solyc04g074770.2.1				Y			Y		Y	Y	5.6526	6.48607	19.0827	16.2865	6.04579	7.36066	4.52269	5.56498	11.9949	11.0533	10.8643	14.346	9.43824	7.56227
Solyc04g074810.2.1			Y	Y							21.8567	19.1493	53.939	52.221	40.1992	33.583	36.3375	24.4635	49.3505	48.2638	48.37	49.5528	44.2167	50.2668
Solyc04g074850.2.1				Y					Y	Y	4.7105	2.57384	7.83164	6.31752	2.33346	2.62881	2.96314	4.22042	2.57034	3.10873	1.51156	1.38195	2.11645	2.55041
Solyc04g074900.2.1									Y		1.13052	1.26976	1.54427	1.88367	0.636398	0.722922	1.09168	1.00842	1.45653	1.53866	2.45629	1.74389	1.25843	1.0083
Solyc04g074950.2.1						Y	Y		Y		0.847891	2.23066	3.08853	3.3906	1.48493	1.24868	1.09168	1.04577	2.65602	3.14013	2.45629	2.17164	2.57406	2.66904
Solyc04g074990.2.1				Y			Y				102.406	82.7059	35.8491	40.3684	83.8985	67.4289	100.279	74.6977	26.9029	23.1742	74.3499	76.2376	55.5998	62.5147
Solyc04g075000.1.1							Y		Y		65.2876	60.3993	40.2612	31.5007	81.5651	67.7575	77.1976	66.6303	35.8991	31.9351	77.7509	73.5066	47.5344	48.1909
Solyc04g076010.2.1			Y	Y		Y	Y		Y	Y	1.13052	1.09817	0.110305	0.376733	2.12133	0.985803	1.24764	0.784326	0.599746	0.439618	0.566835	1.38195	2.57406	2.69869
Solyc04g076190.1.1		Y									29.2051	24.1254	34.5254	31.3268	58.0183	54.2849	37.2732	33.1658	19.8773	21.0075	72.0826	74.2634	39.0114	49.9999
Solyc04g076240.1.1	Y	Y	Y	Y			Y		Y	Y	0.942101	1.33839	5.95646	5.27426	0.212133	0	0.31191	0.410837	0.171356	0.0628026	0.0944726	0.296132	0.114403	0.118624
Solyc04g076280.2.1				Y			Y		Y	Y	43.7135	45.5054	0.772133	1.68081	34.7898	34.5688	45.5388	39.5151	3.08441	2.92032	39.2061	40.4385	19.1625	27.5504
Solyc04g076480.2.1	Y	Y	Y	Y		Y	Y	Y			3.20314	3.43178	17.9797	17.7354	10.9248	10.7781	4.36673	8.1047	17.3926	14.8842	6.42414	8.55493	23.9102	28.3214
Solyc04g076630.2.1		Y	Y	Y	Y		Y		Y	Y	3.95682	4.80449	38.3861	43.9908	1.06066	1.77444	2.96314	3.54814	8.39644	9.26339	2.7397	3.61939	1.71604	2.52076
Solyc04g076700.2.1			Y								1.31894	1.99043	3.97097	2.86897	2.01526	3.81177	1.40359	3.0626	3.34144	3.42274	1.32262	2.99423	5.14813	3.44009
Solyc04g076790.2.1			Y			Y					50.3082	49.7265	74.2351	80.9107	72.0191	69.5977	51.1532	47.5824	106.755	109.999	56.5891	55.5083	106.909	108.689
Solyc04g076820.1.1				Y			Y		Y	Y	13.8489	12.4574	60.1161	36.3692	30.6532	16.2329	20.2741	12.101	41.0397	42.172	29.381	23.9209	20.2493	23.8434
Solyc04g076830.2.1			Y	Y		Y	Y	Y	Y	Y	2.16683	2.64247	11.3614	9.24445	1.69706	2.56309	2.65123	2.09153	7.45398	8.13294	2.92865	2.17164	6.06335	4.21114
Solyc04g076860.2.1				Y							54.8303	53.879	134.792	118.091	95.2476	70.9778	77.6655	59.6461	186.35	198.959	91.0716	89.6294	96.842	118.772
Solyc04g076960.2.1									Y	Y	14.5083	13.0065	22.5022	17.1269	10.2884	8.60934	7.48583	13.9685	11.6522	12.4663	16.4382	14.9382	8.35141	8.27401
Solyc04g076990.2.1				Y					Y	Y	2.07262	1.16681	2.4267	4.46284	1.06066	1.3144	1.87146	1.86744	5.48339	5.14982	2.36181	4.14585	2.28806	1.03796
Solyc04g077050.2.1				Y			Y		Y	Y	2.35525	1.9218	4.85341	3.88325	0.742465	1.18296	2.49528	1.19516	2.05627	2.10389	1.13367	0.888397	1.88765	1.51245
Solyc04g077170.2.1			Y			Y		Y		Y	3.7684	2.33361	2.75762	2.55019	4.45479	4.07465	2.18337	2.20358	5.65474	5.27542	3.49549	3.35617	10.9255	10.9134
Solyc04g077480.2.1			Y			Y				Y	35.7056	37.4751	35.7387	34.2537	44.5479	53.3648	41.7959	35.3693	52.6063	48.7976	49.5036	53.3696	80.082	75.9489
Solyc04g077570.1.1									Y	Y	1.22473	1.44135	2.53701	2.43428	1.2728	0.591482	1.24764	1.34456	1.11381	1.63287	0.944726	1.51356	0.80082	0.622775
Solyc04g077650.2.1			Y	Y		Y	Y				4.52208	4.59859	2.86792	1.36204	3.60626	3.48317	7.32988	6.72279	1.5422	1.53866	2.55076	3.81682	1.71604	2.34282
Solyc04g077720.1.1			Y	Y			Y		Y	Y	2.35525	2.67679	0.110305	0.0289795	0.848531	1.77444	2.65123	1.5313	0.171356	0.157007	1.0392	1.18453	0.858021	1.03796
Solyc04g077780.2.1		Y						Y	Y		1.41315	1.75021	1.21335	1.44897	0.636398	0.591482	1.55955	1.26986	2.48466	1.44446	1.13367	1.18453	1.54444	1.80901
Solyc04g077830.2.1				Y			Y		Y	Y	10.3631	10.261	21.1785	21.6477	4.34872	6.37486	6.86201	7.65651	13.6228	13.8794	8.9749	13.0298	9.83865	9.07472
Solyc04g077860.2.1				Y			Y		Y		6.21786	4.83881	11.9129	11.7077	6.04579	4.00893	4.67864	4.59391	16.5358	15.261	10.1086	12.3059	7.60779	8.4816
Solyc04g078010.2.1		Y	Y	Y							2.73209	3.26019	0.882438	1.36204	1.69706	1.3144	2.96314	1.94214	1.02814	0.942039	1.41709	1.8755	1.25843	1.24555
Solyc04g078060.1.1							Y		Y		2.26104	2.43656	1.21335	1.50693	4.24266	2.10305	4.21078	3.69753	2.22763	2.3551	2.83418	2.99423	2.45966	1.89798
Solyc04g078110.1.1			Y			Y		Y			7.72522	4.46132	6.17707	8.11425	4.34872	4.27181	5.92628	5.00474	34.6996	37.9328	4.72363	6.18587	14.0143	14.7687
Solyc04g078140.2.1	Y	Y	Y	Y		Y	Y	Y	Y	Y	15.8273	14.2762	0.110305	0.347754	2.22739	4.07465	6.5501	6.53605	0.42839	0.282612	2.92865	2.53358	1.60164	1.57177
Solyc04g078460.2.1		Y	Y	Y	Y	Y		Y		Y	12.6241	10.0894	35.9594	24.8354	37.3354	40.4179	14.3478	15.4998	239.127	197.42	18.0443	14.0169	187.049	132.236
Solyc04g078540.2.1				Y			Y				61.425	64.9979	139.646	138.551	90.2625	89.3137	60.0426	66.9291	151.222	171.357	99.952	89.3332	99.1301	94.7211
Solyc04g079050.1.1				Y			Y				26.1904	27.4542	9.59652	10.7224	15.2736	16.8244	27.76	24.2767	13.8798	11.9953	11.6201	20.828	14.8152	15.1245
Solyc04g079250.2.1		Y									1.03631	1.50998	1.65457	1.85469	2.65166	2.76025	2.80719	1.64335	1.97059	1.85268	1.98392	2.66519	2.05925	2.16488
Solyc04g079310.2.1				Y			Y		Y		88.0864	76.8033	36.2903	32.0223	97.6872	101.275	94.1967	75.7434	42.1535	36.8023	102.597	84.5293	63.2648	66.2514
Solyc04g079320.2.1				Y		Y	Y				38.8145	36.8916	18.2003	16.6632	35.7444	28.9169	37.1172	41.756	18.3351	15.104	24.5629	29.3829	18.2473	19.8102
Solyc04g079340.2.1				Y			Y				15.7331	22.135	8.71408	8.40405	9.65204	11.8954	20.1182	17.4793	10.1957	8.82377	13.2262	16.1886	9.78144	11.2396
Solyc04g079570.1.1		Y		Y						Y	7.06575	5.11335	19.9652	14.4318	17.7131	10.7124	10.449	8.40349	13.1944	7.88173	11.9035	11.9111	7.43619	6.76156
Solyc04g079660.2.1				Y			Y			Y	1.22473	1.02953	2.86792	2.4053	1.9092	1.51156	0.155955	1.6807	1.19949	1.06764	4.25127	3.35617	1.48724	0.800711
Solyc04g079700.2.1				Y			Y		Y	Y	5.18155	4.90745	2.09579	1.18816	9.65204	6.44058	5.45842	7.17098	2.99873	2.3237	17.2885	19.5776	8.23701	11.5065
Solyc04g079710.2.1					Y	Y	Y				1.31894	1.33839	0.551524	1.1302	0.954598	0.591482	2.49528	1.79274	1.28517	1.03624	0.37789	0.954204	0.743619	1.12693
Solyc04g079730.1.1							Y				1.78999	1.47567	2.53701	2.72407	1.9092	1.90589	0.935729	1.41926	3.85551	2.73191	0.850253	1.8755	2.80287	2.31316
Solyc04g079890.2.1										Y	0.65947	0.926581	2.75762	1.36204	0.848531	1.51156	1.55955	1.19516	1.97059	0.973441	2.36181	2.66519	1.14403	0.385527
Solyc04g080030.2.1										Y	16.6752	18.0855	10.479	11.4469	15.8039	18.6645	19.9622	17.9274	21.2481	22.3577	15.3046	17.7021	24.139	24.4365
Solyc04g080040.2.1			Y			Y					2.35525	2.8827	0.882438	1.59387	0.636398	1.97161	2.33932	2.68912	0.685424	0.565224	1.32262	0.9213	1.08683	0.919334
Solyc04g080130.2.1			Y	Y		Y	Y		Y	Y	35.1404	38.333	3.75036	4.60774	26.0923	22.6077	32.1267	32.4935	0.942457	1.35026	22.4845	23.7893	11.3259	14.65
Solyc04g080290.2.1				Y			Y		Y		13.2836	12.0456	29.8926	29.675	12.834	15.8386	14.6598	14.342	26.7315	25.9061	22.4845	27.2771	21.1645	19.5729
Solyc04g080310.1.1		Y	Y								3.57998	3.15724	2.2061	2.23142	1.37886	1.18296	2.96314	1.94214	2.48466	1.50726	2.36181	3.38907	1.77324	1.0083
Solyc04g080490.2.1				Y			Y		Y	Y	58.4102	52.8494	25.2598	22.604	66.6097	53.9563	58.4831	51.5414	48.9221	46.4739	42.4182	48.7302	66.4109	80.9607
Solyc04g080540.2.1			Y	Y		Y	Y	Y	Y	Y	0	0	6.50798	7.53466	0.212133	0.0657202	0	0	1.28517	1.25605	0	0.0987107	0.858021	0.771055
Solyc04g080580.2.1			Y			Y					88.1806	79.4801	151.118	152.432	90.4746	102.195	80.7846	77.4241	245.724	244.93	119.508	109.997	170.46	184.549
Solyc04g080620.2.1			Y	Y			Y		Y		0.56526	0.754992	3.30914	2.55019	0.848531	1.18296	1.40359	0.784326	0.942457	1.60147	0.944726	1.61228	1.60164	1.27521
Solyc04g080640.1.1		Y	Y	Y	Y	Y	Y	Y	Y	Y	0.0942101	0.171589	1.87518	2.08652	1.06066	0.657202	0	0	9.42457	6.65708	0.37789	0.658072	6.17775	6.64293
Solyc04g080740.1.1										Y	15.262	16.8844	12.3541	15.2722	15.2736	18.5988	20.8979	12.3998	23.9041	21.8239	15.1156	19.5447	25.3974	35.2906
Solyc04g080750.2.1				Y					Y		3.86261	4.39268	1.54427	1.53591	2.65166	3.61461	2.65123	3.24935	2.14195	1.63287	3.58996	2.82971	2.23086	2.90628
Solyc04g080820.2.1			Y		Y	Y		Y	Y	Y	2.44946	1.68157	1.54427	1.41999	2.96986	4.53469	1.40359	1.606	16.6215	18.5896	1.32262	0.690975	16.9888	15.8066
Solyc04g080940.2.1			Y	Y		Y	Y		Y	Y	47.8587	42.3825	5.18432	3.33264	26.9409	31.6114	32.7505	33.4646	1.5422	2.76332	24.8463	30.0081	15.044	16.1625
Solyc04g080970.2.1			Y	Y		Y	Y	Y		Y	19.5957	20.1789	45.3353	43.9619	30.2289	34.8974	21.6777	20.0937	175.983	130.001	51.1097	41.8863	134.366	103.529
Solyc04g081240.2.1				Y			Y				310.611	306.904	745.55	755.987	404.325	389.063	327.193	351.34	502.501	506.032	415.774	396.291	440.909	447.716
Solyc04g081250.1.1		Y	Y				Y		Y	Y	1.50736	1.61294	2.09579	2.31836	0.742465	0.722922	0.779774	0.784326	0.0856779	0.47102	0.37789	0.888397	0.743619	0.741399
Solyc04g081400.2.1							Y				29.2051	23.7479	15.3324	12.1134	23.8649	22.1477	32.9065	27.4887	16.9642	17.8359	23.2403	21.9138	20.8213	22.7758
Solyc04g081790.2.1				Y			Y				8.57312	9.64331	3.64006	3.44856	5.09119	8.01786	7.01797	8.55288	2.65602	2.76332	8.03017	5.62651	6.63537	6.85052
Solyc04g081870.2.1		Y	Y	Y	Y	Y	Y				6.68891	4.80449	1.21335	0.869384	0.742465	1.3144	3.27505	3.39874	0.0856779	0.596625	1.98392	2.10583	0.457611	0.771055
Solyc04g081890.1.1			Y			Y					4.80471	3.19156	5.62554	5.82487	6.36398	4.33753	6.86201	3.24935	10.367	8.63536	5.66835	3.61939	9.49544	9.75681
Solyc04g081970.2.1			Y								9.51522	9.74626	4.6328	5.44814	5.51545	5.45478	8.42156	7.43242	3.34144	4.45899	5.76283	7.66653	4.97652	4.53736
Solyc04g082000.2.1		Y		Y							4.05103	2.98565	0.551524	1.50693	1.9092	1.11724	1.55955	1.64335	0.514068	0.847835	1.22814	1.02001	1.94485	1.66073
Solyc04g082010.1.1			Y	Y							19.4073	9.47172	3.86067	7.70854	9.01564	7.1635	9.35729	7.80591	5.56907	3.76816	5.8573	7.86396	5.77734	5.04151
Solyc04g082030.1.1			Y	Y	Y	Y	Y		Y		89.0285	90.599	500.784	463.092	138.947	126.709	69.8678	60.3931	353.25	378.072	291.164	285.57	277.141	237.544
Solyc04g082050.2.1						Y		Y		Y	4.42787	4.73586	3.97097	3.04284	3.39412	4.33753	3.89887	3.80958	3.68415	2.60631	4.15679	3.55359	7.66499	8.24435
Solyc04g082170.2.1			Y			Y		Y		Y	0.942101	0.78931	0.661829	0.985302	0.424266	0.525761	0.467864	0.448186	1.02814	0.628026	0.283418	0.197421	4.51891	3.88493
Solyc04g082200.2.1		Y	Y	Y		Y	Y				5.18155	3.77496	0.882438	1.41999	2.12133	1.57728	3.89887	2.46502	1.37085	1.94688	1.70051	2.27035	1.08683	1.60142
Solyc04g082410.2.1				Y			Y		Y		31.6546	33.7344	97.3991	101.341	41.578	41.7323	45.5388	40.5608	80.9657	76.9646	44.1187	49.1909	59.8327	58.9857
Solyc04g082420.2.1				Y			Y		Y		23.4583	24.7431	60.6676	74.3034	23.6528	30.2313	24.6409	28.6839	51.1497	57.1504	25.4131	35.4701	38.6682	42.7342
Solyc04g082480.2.1			Y	Y		Y	Y		Y		10.7399	10.4669	2.86792	3.27468	8.80351	7.29494	8.88942	10.3456	3.34144	3.51695	8.9749	9.64075	3.48929	4.83392
Solyc04g082490.2.1				Y							58.1276	63.9684	29.0102	26.9219	43.3812	47.3185	51.777	55.9112	25.7034	23.9906	46.6695	54.4883	42.7867	51.4234
Solyc04g082630.2.1			Y	Y		Y	Y				192.942	181.301	48.5341	54.8002	89.52	98.0545	138.02	141.701	45.495	54.4499	63.6745	67.1562	53.7121	58.2739
Solyc04g082830.2.1		Y	Y	Y							3.48577	3.19156	1.10305	1.10122	1.2728	1.38012	1.7155	2.27828	1.62788	0.879237	3.02312	1.94131	1.48724	1.60142
Solyc04g082870.1.1							Y				2.63788	2.40225	2.97823	3.91223	2.75773	1.77444	1.55955	1.71805	2.39898	3.73676	2.26734	1.8426	2.11645	2.63938
Solyc04g082880.2.1			Y	Y		Y	Y	Y	Y		22.893	21.8604	106.003	107.572	24.5013	27.5368	17.155	18.3383	58.8607	64.1843	32.3096	32.0152	58.2883	58.7484
Solyc04g082970.2.1			Y								11.4936	13.178	7.83164	6.92609	8.80351	7.95214	9.98111	9.97214	3.85551	3.01453	4.06232	6.12007	4.69052	6.28706
Solyc04g083160.1.1				Y			Y		Y	Y	2.35525	2.05907	7.72133	7.36079	2.86379	2.56309	2.80719	2.24093	5.91178	4.64739	2.26734	3.6523	2.51686	3.20284
Solyc05g005060.2.1				Y			Y		Y	Y	1.13052	1.75021	2.75762	4.02815	0.742465	1.44584	0.935729	0.933721	1.79924	2.3865	0.944726	1.41485	1.31563	1.12693
Solyc05g005150.1.1				Y		Y	Y		Y		5.46418	5.42221	16.8766	18.9526	6.78825	8.74078	6.70606	4.03367	16.1075	17.2707	13.3206	16.0569	10.4679	10.172
Solyc05g005180.2.1				Y							15.3562	16.7128	7.61103	7.82446	8.06105	10.3181	11.5407	11.8022	8.73915	7.97593	9.25831	8.62074	10.0102	10.3499
Solyc05g005200.2.1			Y	Y		Y	Y				12.5299	13.8987	5.18432	5.3612	10.0763	9.20083	17.9348	14.1552	7.02559	3.89376	8.03017	7.79815	5.77734	6.43534
Solyc05g005280.2.1										Y	8.66733	10.5013	5.95646	5.15835	7.31858	7.55782	7.32988	9.89744	4.45525	4.30198	6.04625	5.33038	12.0695	14.0569
Solyc05g005300.2.1			Y	Y		Y	Y		Y	Y	4.89892	5.79971	0.772133	0.637548	2.96986	3.08885	5.45842	5.75172	1.28517	1.06764	5.19599	4.67231	1.88765	1.51245
Solyc05g005320.1.1							Y				7.25417	5.42221	8.05225	8.83874	4.45479	4.60041	4.67864	3.09995	7.53966	7.47351	5.66835	7.50202	6.12055	7.17674
Solyc05g005480.2.1			Y	Y			Y				76.4044	77.9701	25.8113	22.8938	44.5479	50.2102	60.5105	67.1532	26.2175	21.0703	39.8674	41.1953	33.4056	42.5266
Solyc05g005520.1.1			Y	Y		Y	Y	Y	Y		0.28263	0.686356	1.98549	2.20244	0.848531	0.328601	0.467864	0.485535	3.34144	2.16669	0.755781	0.756782	1.31563	1.51245
Solyc05g005540.2.1				Y			Y		Y	Y	1.22473	1.33839	0.441219	0.405713	1.37886	1.3144	0.467864	1.6807	0.342712	0.533822	1.60603	0.723879	0.915223	1.21589
Solyc05g005670.1.1			Y								1.50736	1.81884	1.21335	1.10122	0.954598	1.18296	1.7155	1.19516	0.771102	0.753631	1.22814	1.15163	0.915223	0.533807
Solyc05g005700.2.1							Y				8.19627	7.72151	3.86067	4.231	7.53071	8.01786	8.2656	9.03842	3.5128	5.84064	5.8573	8.16009	4.74772	7.88848
Solyc05g005710.2.1				Y			Y		Y		209.806	214.624	435.483	495.143	216.588	236.133	212.566	211.768	526.834	554.704	323.285	360.952	365.86	341.548
Solyc05g005810.2.1				Y			Y		Y	Y	3.67419	3.15724	8.71408	12.1134	3.71232	3.08885	3.27505	2.87586	1.5422	1.19325	3.30654	3.32326	2.68847	3.02491
Solyc05g005900.2.1									Y		1.60157	1.50998	1.32366	2.2604	0.530332	1.11724	1.24764	1.19516	1.11381	0.973441	2.0784	1.74389	1.65884	1.33452
Solyc05g005930.1.1									Y		3.57998	3.26019	5.07402	6.81018	2.22739	3.54889	4.67864	2.80116	8.1394	7.63052	5.10152	7.60073	5.60574	6.02016
Solyc05g006010.2.1			Y			Y					5.93523	5.42221	7.50072	9.07057	9.43991	7.62354	7.17392	6.64809	29.5589	27.7588	9.82515	9.11429	16.0164	16.2515
Solyc05g006100.2.1									Y		8.19627	9.88353	4.96371	5.33222	12.728	11.9611	9.82515	10.0095	9.3389	7.2223	9.91962	8.94977	9.89585	8.12573
Solyc05g006160.2.1		Y	Y			Y				Y	12.4357	12.6633	17.0972	17.3007	28.4258	24.0536	18.7146	15.9106	45.752	34.4786	21.0674	23.9538	42.6723	37.2182
Solyc05g006220.2.1			Y	Y		Y	Y	Y	Y		0.0942101	0.240225	4.5225	4.25998	0.636398	0.657202	0	0.224093	4.96932	4.20778	2.0784	2.86261	3.08888	2.34282
Solyc05g006430.1.1			Y			Y				Y	1.97841	2.5052	1.65457	2.52121	2.01526	4.07465	2.18337	1.90479	5.31203	4.61599	2.17287	1.8097	6.00615	5.2491
Solyc05g006550.2.1			Y								98.2611	108.238	139.536	141.246	145.841	144.059	129.131	132.551	153.878	147.021	132.828	149.218	251.343	263.641
Solyc05g007010.1.1				Y			Y		Y	Y	17.2404	19.7671	4.85341	4.17304	11.7734	13.6041	14.8157	13.1468	2.48466	3.17153	11.4312	11.6479	10.4107	11.1803
Solyc05g007180.2.1				Y			Y			Y	41.264	39.3625	12.9057	16.6922	25.2438	26.8796	45.6948	30.9995	20.8197	24.336	28.2473	37.0165	36.9521	48.3095
Solyc05g007240.1.1				Y			Y		Y	Y	22.3278	22.1007	58.6821	43.2084	24.3953	17.3501	24.7968	21.0647	19.7059	19.1862	18.0443	19.5118	14.5292	17.2598
Solyc05g007580.1.1				Y			Y		Y		5.6526	5.9713	2.09579	2.66611	4.98512	5.25761	5.92628	5.45293	5.91178	4.52179	5.00705	6.05426	5.20533	4.83392
Solyc05g007710.2.1			Y				Y			Y	1.41315	1.61294	0.992743	1.9706	1.06066	1.51156	0.779774	0.746977	0.257034	0.0942039	0.850253	0.723879	0.572014	0.800711
Solyc05g007780.2.1		Y	Y	Y							1.97841	2.5052	0.992743	0.782446	0.530332	0.920083	1.24764	1.15781	0.685424	0.408217	0.850253	0.756782	0.457611	0.741399
Solyc05g007830.2.1							Y				211.313	233.807	135.234	118.787	219.239	252.234	236.116	275.298	182.151	172.079	226.262	186.827	182.816	189.057
Solyc05g007870.1.1				Y			Y		Y	Y	36.9303	35.2787	15.0014	12.7799	38.6082	40.0236	41.7959	40.262	16.3645	13.1571	50.0705	51.527	36.8377	42.2301
Solyc05g007880.2.1							Y				37.8724	37.2691	18.5312	20.8073	39.3506	34.4374	47.4103	54.1932	26.3888	22.2007	29.2865	28.0339	30.374	31.465
Solyc05g007900.2.1		Y	Y						Y	Y	1.8842	2.05907	2.09579	1.79673	4.56086	4.07465	2.33932	4.48186	2.3133	2.4807	1.88945	2.50067	5.54854	7.2064
Solyc05g008000.2.1			Y			Y		Y			6.02944	6.89788	4.5225	3.79631	8.59138	5.32333	8.42156	6.68544	3.85551	3.17153	8.03017	8.12718	2.86007	2.758
Solyc05g008020.2.1				Y			Y		Y		7.25417	8.54514	3.64006	3.99917	8.48531	8.1493	11.3847	11.5034	3.94119	2.85752	5.76283	4.27747	6.92137	5.78291
Solyc05g008290.2.1		Y	Y	Y		Y	Y	Y	Y		3.67419	4.87313	0.551524	0.927343	1.69706	2.49737	1.87146	3.69753	0.342712	0.376816	1.70051	1.21743	0.858021	1.0083
Solyc05g008410.1.1						Y	Y	Y	Y		6.12365	3.36315	2.97823	1.56489	12.9401	5.25761	10.6049	3.09995	5.91178	1.97828	6.8965	3.38907	2.28806	1.89798
Solyc05g008770.2.1	Y										4.33366	3.29451	2.4267	2.37632	1.2728	2.95741	2.18337	1.23251	3.34144	2.82612	2.92865	3.38907	1.65884	2.55041
Solyc05g009060.2.1			Y								2.63788	4.01518	5.07402	5.59304	2.43953	4.86329	4.52269	3.77223	5.8261	5.36962	5.29046	4.86973	6.12055	7.94779
Solyc05g009270.2.1			Y	Y			Y		Y	Y	1.03631	1.20112	7.39042	7.30283	2.12133	2.03733	1.09168	1.90479	5.65474	5.52663	1.79498	2.40196	2.86007	2.46144
Solyc05g009500.2.1	Y	Y	Y	Y		Y	Y	Y	Y	Y	10.2689	13.3496	0.441219	0.55061	2.43953	4.86329	4.8346	4.85535	0.856779	1.91548	2.0784	5.19877	1.31563	2.25385
Solyc05g009520.1.1				Y			Y				2.8263	2.60815	1.21335	1.24612	1.591	1.97161	4.36673	1.49395	2.57034	1.66427	3.7789	5.79103	2.28806	2.0166
Solyc05g009740.1.1				Y			Y		Y		1.8842	2.1277	4.5225	5.04243	2.12133	2.56309	1.40359	2.27828	3.34144	2.85752	3.49549	3.38907	2.57406	2.84697
Solyc05g009770.1.1			Y			Y		Y		Y	4.14524	3.56905	2.97823	2.46325	3.39412	2.69453	3.89887	3.3614	8.56779	8.41555	2.64523	2.731	7.66499	7.62158
Solyc05g010240.2.1	Y			Y							1.03631	1.9218	2.53701	4.11508	3.50019	1.77444	3.58696	3.73488	4.79796	3.89376	4.72363	4.17875	2.05925	3.11387
Solyc05g010320.2.1			Y	Y							82.057	83.8727	39.5994	39.0353	43.2751	42.7181	62.3819	54.9401	33.8428	31.5897	36.7498	37.7404	39.2402	37.0403
Solyc05g010440.1.1			Y								1.50736	0.926581	0.882438	1.94162	1.37886	1.77444	2.02741	1.19516	2.82737	2.4493	2.7397	3.45488	2.40246	3.08422
Solyc05g010590.2.1				Y			Y		Y	Y	6.5947	7.72151	14.0087	19.1844	7.10645	6.90062	6.08224	6.12521	5.99746	8.63536	9.6362	12.3388	6.46376	6.43534
Solyc05g011890.1.1				Y		Y		Y		Y	4.99313	2.09339	0.882438	1.41999	1.9092	1.44584	1.87146	1.56865	1.5422	1.53866	1.22814	3.02713	3.8325	4.27046
Solyc05g011980.2.1			Y	Y		Y	Y		Y		3.48577	2.40225	13.1263	11.8236	5.83365	5.12617	3.43101	2.83851	7.19695	11.7441	8.03017	10.8911	6.46376	8.06642
Solyc05g012280.2.1			Y	Y		Y	Y		Y	Y	9.3268	8.37355	0.882438	1.07224	3.18199	5.32333	8.10965	6.79749	2.22763	1.91548	5.47941	5.33038	2.63127	2.43179
Solyc05g012350.2.1							Y		Y		0.942101	0.892263	1.98549	1.73877	0.636398	0.985803	0.623819	0.821674	1.28517	1.97828	1.79498	1.48066	1.37283	1.27521
Solyc05g012580.1.1				Y			Y		Y		188.043	168.809	77.4339	53.7569	220.406	173.501	240.794	182.673	125.347	108.46	149.834	165.077	128.932	118.06
Solyc05g012600.2.1			Y			Y					9.51522	11.3249	5.84615	6.20161	5.40939	5.98054	9.51324	9.37456	5.56907	4.8672	5.47941	5.95555	4.91932	4.32977
Solyc05g013240.2.1				Y			Y		Y	Y	11.3052	10.4669	3.08853	3.18774	9.33384	9.13511	12.4764	9.15046	2.91305	3.57975	5.00705	7.86396	7.09298	7.11743
Solyc05g013440.2.1				Y			Y		Y	Y	400.958	352.375	86.3686	94.618	250.423	276.748	341.541	385.291	89.5335	104.661	299.95	324.1	174.464	213.493
Solyc05g013450.2.1									Y		1.31894	1.23544	0.882438	1.2751	1.9092	2.76025	1.55955	1.23251	2.3133	2.07249	2.55076	2.50067	1.83045	1.89798
Solyc05g013570.2.1				Y			Y		Y	Y	2.92051	2.02475	0.882438	1.10122	2.43953	2.76025	2.65123	2.46502	1.11381	0.785033	2.36181	2.50067	2.63127	2.55041
Solyc05g013850.2.1			Y	Y		Y	Y	Y	Y	Y	5.18155	5.73107	1.10305	0.318774	3.60626	3.48317	5.30246	4.93005	0.171356	0.188408	5.10152	4.37618	1.08683	1.18624
Solyc05g013860.2.1		Y	Y	Y			Y		Y	Y	4.23945	2.98565	0.441219	0.0289795	0.742465	1.24868	1.7155	1.6807	0.342712	0.533822	0.566835	1.61228	1.14403	0.711743
Solyc05g014000.2.1		Y	Y	Y			Y		Y	Y	19.4073	16.9873	2.97823	3.36162	5.40939	7.36066	10.1371	10.5697	4.71229	3.04593	4.34574	5.72522	6.97857	7.05812
Solyc05g014240.2.1				Y			Y		Y		64.4397	67.3659	29.8926	28.8346	49.533	68.7433	68.1523	69.2074	42.9247	36.3941	61.3127	64.0962	52.1105	55.3973
Solyc05g014260.2.1		Y	Y	Y	Y	Y	Y				10.8342	11.5651	3.86067	4.02815	5.19725	4.73185	12.6323	12.1384	2.99873	3.10873	6.8965	13.6221	3.9469	4.38908
Solyc05g014380.2.1			Y								18.5594	20.625	12.7954	17.3587	10.5006	11.8954	11.5407	13.595	10.2814	11.1161	9.91962	16.9782	8.86622	10.083
Solyc05g015640.2.1		Y	Y	Y							2.73209	3.63769	1.54427	1.44897	0.742465	1.44584	1.40359	2.39033	2.05627	1.60147	2.0784	2.04002	1.14403	1.33452
Solyc05g015750.2.1				Y			Y		Y	Y	0	0	17.7591	26.2554	0	0	0	0.112047	0.685424	0.345414	0.472363	0	0.0572014	0
Solyc05g015910.1.1			Y	Y							1.60157	1.68157	3.64006	4.11508	2.86379	2.23449	1.40359	2.50237	7.28263	6.78268	2.26734	2.30325	4.51891	3.82562
Solyc05g016180.2.1				Y			Y			Y	1.31894	1.5443	0.330914	0.840405	0.848531	1.38012	3.1191	1.86744	0.856779	1.09905	2.83418	1.34905	1.48724	2.04626
Solyc05g016710.1.1						Y					4.14524	4.83881	9.37591	6.60732	5.19725	6.44058	3.58696	4.51921	13.8798	13.1257	20.0282	13.8524	7.26458	9.46025
Solyc05g024160.2.1	Y						Y				5.6526	6.65766	5.62554	6.72324	10.6066	8.41218	14.3478	12.96	4.71229	2.82612	4.25127	5.5278	6.34936	7.17674
Solyc05g024260.2.1				Y			Y		Y	Y	5.18155	4.08382	1.54427	1.76775	3.07593	3.81177	4.36673	3.54814	2.14195	2.19809	2.7397	1.90841	4.91932	3.11387
Solyc05g024410.2.1			Y	Y			Y				20.161	20.2132	57.0276	56.9447	40.1992	35.7518	25.8885	25.7333	51.8352	60.4161	42.3237	40.8004	39.2402	43.9205
Solyc05g024430.2.1		Y	Y	Y							1.97841	2.57384	0.551524	0.927343	0.530332	1.05152	0.935729	1.606	0.685424	0.596625	0.850253	1.31614	0.514813	0.771055
Solyc05g025810.2.1			Y	Y		Y	Y				16.3925	17.1246	6.8389	6.72324	12.0916	11.5668	15.4395	16.8443	5.65474	6.15466	14.1709	14.4776	5.94895	6.90984
Solyc05g026240.1.1				Y							72.7302	61.0857	31.4369	31.4717	64.7005	59.9368	66.1248	53.9691	35.2136	32.3748	73.3107	69.1633	45.5895	54.8635
Solyc05g026460.1.1				Y			Y	Y	Y		2.07262	2.40225	5.95646	6.08569	1.80313	2.16877	2.80719	2.95056	7.11127	7.44211	5.66835	5.13296	4.40451	4.62633
Solyc05g026500.1.1			Y			Y		Y		Y	1.60157	2.57384	2.86792	1.88367	2.75773	2.76025	2.80719	2.76381	9.42457	8.66676	7.55781	6.28458	7.8366	9.37128
Solyc05g026550.2.1		Y	Y	Y							2.73209	4.32404	1.65457	1.33306	1.69706	1.70872	2.02741	2.31563	1.11381	1.22465	1.79498	1.8426	1.25843	1.36417
Solyc05g032690.2.1		Y									1.41315	2.26498	0.992743	1.21714	0.742465	0.854362	0.935729	1.38191	0.342712	0.690829	1.13367	1.28324	1.43004	1.7497
Solyc05g039950.1.1			Y							Y	2.54367	4.15246	4.08128	2.86897	2.12133	2.69453	2.65123	2.68912	2.74169	2.22949	3.7789	3.58649	1.14403	2.04626
Solyc05g040040.1.1			Y			Y			Y	Y	2.73209	2.84838	3.64006	2.75305	1.48493	1.3144	1.55955	2.61442	0.599746	1.03624	1.51156	2.27035	0.114403	0.860023
Solyc05g041200.2.1				Y			Y		Y	Y	17.6173	20.0759	77.5443	83.8666	22.38	15.5757	21.6777	22.6334	50.8927	63.7761	20.3116	18.3273	25.7978	31.2277
Solyc05g043240.1.1				Y			Y		Y	Y	2.8263	2.47088	0.661829	0.985302	2.22739	3.02313	2.02741	2.24093	1.45653	1.72707	1.70051	1.44776	2.63127	2.34282
Solyc05g045670.2.1		Y		Y				Y		Y	11.1168	9.98648	4.19158	4.54978	3.92446	4.79757	7.9537	5.04209	12.3376	9.82861	6.04625	4.67231	10.0102	9.34162
Solyc05g047460.2.1				Y							103.819	92.0747	210.131	205.754	167.479	162.789	131.626	133.634	184.807	199.838	145.11	144.842	131.563	159.045
Solyc05g047710.2.1		Y	Y	Y		Y				Y	3.57998	2.91701	6.28737	6.81018	8.90958	6.30914	3.89887	3.77223	19.5346	18.15	1.51156	2.43486	14.9296	12.9893
Solyc05g048830.2.1						Y					26.0962	24.4343	20.4064	21.6187	24.0771	23.0678	26.5123	28.4598	13.023	13.1886	29.4754	27.1455	14.0716	12.93
Solyc05g049980.2.1				Y			Y		Y	Y	74.9912	58.3746	166.009	180.658	71.4888	72.095	84.8394	71.0375	53.2917	51.6552	109.021	103.482	64.466	63.2858
Solyc05g049990.2.1			Y				Y		Y	Y	1.13052	1.9218	1.98549	2.69509	1.2728	1.11724	1.7155	0.821674	3.85551	3.14013	1.60603	2.43486	0.572014	0.830367
Solyc05g050130.2.1			Y		Y	Y		Y		Y	7.63101	7.44697	5.40493	9.04159	7.74285	12.3554	4.21078	4.70595	13.5371	15.1982	3.96785	3.35617	37.4669	31.3167
Solyc05g050210.2.1			Y	Y		Y	Y				5.08734	4.35836	10.3686	9.93996	5.51545	6.70346	2.80719	3.51079	8.73915	9.5774	6.14072	7.27169	12.4699	11.892
Solyc05g050280.2.1				Y			Y		Y	Y	9.51522	13.933	2.53701	3.99917	6.57612	9.06939	12.1645	10.8685	8.73915	8.72956	4.25127	5.92264	7.26458	7.53261
Solyc05g050520.2.1			Y			Y		Y		Y	9.42101	10.8444	15.2221	14.4608	14.2129	16.4958	9.04538	12.2504	34.9566	30.9931	11.4312	10.233	38.2106	30.2194
Solyc05g051360.1.1							Y			Y	1.8842	1.78453	1.10305	1.85469	1.80313	3.61461	4.21078	2.53972	3.85551	2.88892	0.755781	1.21743	4.34731	2.81732
Solyc05g051400.2.1				Y			Y	Y	Y		10.7399	7.34401	4.5225	2.28938	10.5006	12.7497	8.42156	9.93479	3.25576	3.92516	13.8875	11.615	6.06335	4.06287
Solyc05g051540.1.1				Y			Y		Y	Y	4.89892	5.07904	0.22061	0.260815	2.33346	3.28601	5.14651	4.03367	0.771102	0.376816	3.1176	3.81682	2.80287	2.4911
Solyc05g051580.2.1						Y		Y		Y	0.56526	1.06385	1.10305	1.62285	1.37886	2.30021	1.24764	2.01684	0.42839	0.282612	0.755781	0.658072	0.572014	0.771055
Solyc05g051640.2.1				Y			Y		Y	Y	5.18155	5.07904	1.43396	1.56489	4.66692	3.81177	4.67864	3.62284	1.11381	1.16185	3.58996	4.83683	3.9469	2.81732
Solyc05g051660.1.1		Y						Y	Y		2.07262	1.9218	1.21335	1.88367	0.636398	0.591482	1.87146	1.26986	2.3133	2.4179	1.32262	1.48066	1.31563	1.95729
Solyc05g052030.1.1				Y			Y		Y	Y	4.99313	6.07425	2.97823	2.4053	7.42465	5.5205	7.01797	5.56498	4.19822	4.8358	8.597	9.67365	5.43414	5.18979
Solyc05g052230.1.1						Y		Y			1.13052	2.19634	2.09579	1.65183	0.636398	1.3144	0.935729	1.30721	3.17008	1.57007	0.755781	0.394843	3.14608	2.31316
Solyc05g052240.2.1		Y									44.9382	43.4463	29.8926	27.6754	15.4857	23.5935	27.604	25.7707	24.5896	21.7925	15.8714	10.924	36.3801	33.4519
Solyc05g052410.1.1			Y								1.03631	1.23544	1.21335	1.91265	1.06066	1.84017	2.80719	1.97949	1.45653	1.66427	0.37789	0.46065	2.40246	2.43179
Solyc05g052470.2.1							Y				70.4691	76.9405	42.0261	41.9623	73.1858	80.9015	81.0965	95.5383	47.2942	43.9932	73.5941	90.9126	66.6397	72.0343
Solyc05g052600.2.1			Y			Y					26.3788	27.5572	13.3469	14.4318	13.5765	16.1672	24.3289	21.5129	11.3095	11.7127	13.8875	17.7021	8.98062	9.66784
Solyc05g052910.2.1							Y		Y	Y	9.23259	10.261	6.06676	4.46284	11.243	9.98947	10.7609	11.0926	7.45398	6.06045	7.36886	9.31171	10.1819	9.75681
Solyc05g053310.2.1				Y							30.1472	32.7049	12.1335	16.6922	14.9554	19.1903	23.3932	25.2478	16.2788	15.7007	17.7608	21.9138	16.5884	18.2088
Solyc05g053400.1.1		Y	Y								6.40628	3.4661	3.08853	3.30366	2.75773	1.84017	3.58696	2.27828	2.82737	1.22465	3.21207	4.90263	1.88765	1.92764
Solyc05g054030.2.1				Y			Y		Y	Y	8.10206	8.61377	0.330914	0.115918	5.51545	8.41218	7.17392	6.53605	0.257034	0.188408	5.47941	5.29748	3.8897	4.5077
Solyc05g054340.2.1			Y	Y		Y	Y		Y	Y	3.10893	2.64247	0.110305	0.144897	1.9092	1.18296	2.49528	2.27828	0.171356	0.188408	2.0784	2.17164	0.457611	1.27521
Solyc05g054350.2.1			Y	Y		Y	Y				10.8342	12.2171	2.53701	5.30324	9.54598	6.96634	10.9168	14.6034	5.31203	3.98797	11.3367	17.8008	3.20328	5.21945
Solyc05g054470.2.1		Y	Y	Y	Y	Y	Y	Y		Y	0	0	0.661829	1.56489	1.06066	0.788642	0	0	4.2839	2.76332	0	0.0658072	5.03373	4.68564
Solyc05g055010.2.1				Y			Y		Y	Y	37.5898	43.7209	14.6705	12.693	33.8352	38.5777	33.2184	42.8765	17.2213	13.6596	18.989	13.5892	37.2953	31.5836
Solyc05g055020.2.1			Y	Y		Y	Y	Y	Y	Y	11.3994	12.7662	0.882438	1.2751	7.63678	6.63774	13.88	10.2336	0.599746	0.879237	4.72363	4.6394	2.34526	3.61803
Solyc05g055330.2.1			Y	Y		Y	Y		Y		17.7115	18.8748	4.41219	3.33264	10.3945	10.6467	13.5681	16.4335	2.3133	2.3551	5.76283	4.47489	5.94895	6.67259
Solyc05g055400.2.1				Y		Y	Y		Y	Y	4.52208	4.32404	12.3541	13.7942	6.89432	4.73185	4.99055	2.39033	8.48212	9.6402	5.57388	5.69232	6.40656	6.58362
Solyc05g055550.2.1									Y		3.48577	3.39746	4.41219	3.70937	1.48493	2.03733	3.1191	2.76381	2.74169	3.20293	2.83418	2.89552	2.74567	3.73665
Solyc05g055880.2.1				Y			Y		Y		21.2915	20.9339	41.254	43.2953	17.607	20.8333	18.2467	17.9274	34.4425	38.1212	28.4362	24.6119	26.1411	23.8137
Solyc05g055990.2.1			Y	Y		Y					29.1109	29.8908	12.7954	12.8089	20.5769	18.5988	26.6683	24.7623	8.39644	6.93969	17.0995	17.6692	8.92342	10.7355
Solyc05g056040.2.1							Y		Y		76.5928	87.3731	44.5631	39.6439	83.8985	83.2018	89.674	92.7745	71.8838	57.8098	70.4765	69.1304	74.3047	76.5717
Solyc05g056050.2.1			Y	Y		Y	Y				14.5083	10.6042	4.85341	4.54978	8.90958	7.09778	12.7883	10.0468	4.71229	5.49523	5.66835	8.81816	3.54649	4.32977
Solyc05g056120.2.1			Y							Y	29.582	22.3409	27.2453	26.3713	19.3041	12.4211	22.6134	18.7865	15.5077	16.1089	14.8322	15.0698	11.3259	13.7604
Solyc05g056360.1.1				Y			Y		Y	Y	40.793	50.9963	20.9579	22.0534	43.2751	54.0877	47.4103	50.8691	49.3505	43.8048	64.4303	65.1162	56.4006	65.6879
Solyc05g056560.2.1				Y					Y		34.6693	33.9746	20.2961	15.0114	35.7444	38.8406	29.9433	32.9043	19.963	16.2973	20.595	15.4976	32.7192	32.5326
Solyc05g056620.1.1	Y	Y	Y	Y	Y	Y	Y	Y	Y	Y	0	0.0686356	110.194	120.178	11.0309	13.9984	0	0.597581	115.237	110.752	3.68443	6.35039	50.5089	52.6097
Solyc06g005130.2.1			Y	Y		Y	Y	Y	Y		0.65947	0.583403	1.65457	1.85469	0.742465	0.262881	1.09168	0.485535	2.05627	2.07249	0.472363	0.690975	1.37283	1.77936
Solyc06g005400.1.1		Y	Y								6.68891	8.64809	3.97097	7.38976	3.07593	3.87749	5.77033	5.11679	6.93991	7.03389	5.66835	5.95555	3.77529	2.72835
Solyc06g005560.2.1		Y	Y	Y	Y	Y	Y		Y	Y	92.0432	69.5622	3.64006	2.31836	26.6227	25.4337	62.07	54.2305	10.7954	11.5243	18.8	23.1641	19.5629	19.6322
Solyc06g005680.2.1	Y	Y	Y							Y	0.18842	0.480449	0.882438	0.840405	0.848531	1.3144	0.779774	1.5313	1.28517	1.25605	0.850253	1.11872	2.17365	1.51245
Solyc06g005710.2.1				Y			Y				17.9941	18.6003	6.50798	8.63588	11.4552	11.1724	17.311	15.0142	9.85296	9.6716	8.40806	11.9111	8.58021	10.2313
Solyc06g005980.2.1				Y			Y				18.5594	22.0664	8.38316	8.43303	16.1221	15.9043	17.9348	17.8901	8.39644	5.84064	12.7538	13.7537	11.6119	13.2266
Solyc06g007180.2.1		Y	Y	Y		Y	Y	Y	Y	Y	0	0	38.3861	57.2345	0.318199	0.328601	0	0.0373488	68.2853	92.9479	1.13367	3.45488	6.00615	6.64293
Solyc06g007270.1.1								Y		Y	1.60157	1.30408	0.551524	1.01428	1.16673	0.788642	1.24764	1.94214	0.856779	0.847835	1.70051	1.97421	1.94485	2.07592
Solyc06g007620.2.1				Y							4.80471	5.42221	2.75762	2.4053	3.28806	3.41745	3.89887	2.87586	3.5128	3.57975	3.40101	3.98133	3.26048	3.85527
Solyc06g007910.2.1				Y			Y		Y		14.0373	11.2219	4.08128	3.12978	8.27318	7.36066	8.88942	6.90953	3.59847	3.29714	10.5809	12.2401	6.46376	6.465
Solyc06g008280.2.1									Y		1.69578	1.47567	1.10305	1.04326	1.9092	2.49737	1.24764	1.04577	1.28517	1.53866	0.944726	1.67808	1.88765	1.15658
Solyc06g008460.1.1							Y				1.41315	1.33839	0.882438	0.608569	0.954598	1.44584	1.24764	1.606	0.856779	0.533822	1.79498	0.592264	1.37283	0.800711
Solyc06g008500.2.1							Y				45.2208	50.1726	26.6938	23.5313	38.9264	33.9773	52.8687	49.5619	37.2699	30.6477	35.1438	38.0036	33.3484	36.5658
Solyc06g008820.2.1				Y							2.54367	3.05429	6.50798	7.30283	4.03052	3.74605	3.74292	4.44451	4.96932	5.84064	4.8181	4.6065	4.23291	4.44839
Solyc06g008890.2.1				Y			Y				3.29735	2.33361	0.661829	0.956323	0.954598	2.43165	2.33932	2.09153	1.37085	1.38166	2.64523	2.10583	1.14403	1.72005
Solyc06g009020.2.1				Y			Y		Y	Y	390.312	358.655	143.727	127.104	303.138	306.519	353.706	335.542	141.968	134.649	228.435	207.358	299.335	275.889
Solyc06g009190.2.1		Y	Y	Y		Y	Y		Y	Y	6.40628	5.76539	0.551524	0.753466	2.22739	3.08885	5.30246	4.51921	0.514068	0.565224	0.944726	2.10583	1.31563	1.72005
Solyc06g009290.2.1							Y				0.847891	0.823627	0.551524	0.724487	1.16673	1.38012	1.09168	1.64335	0.42839	0.188408	0.472363	0.592264	1.48724	0.94899
Solyc06g009380.2.1				Y							17.5231	19.3552	9.81712	7.09997	14.8493	12.684	16.6872	14.7901	12.3376	12.5605	19.2724	18.6563	12.5843	13.8493
Solyc06g009710.2.1				Y		Y	Y				3.10893	2.57384	6.9492	5.24528	3.81839	2.49737	3.74292	1.94214	5.8261	4.05077	3.49549	2.43486	4.74772	6.10913
Solyc06g009780.2.1				Y			Y				29.1109	28.2436	12.1335	13.0118	26.9409	23.3964	30.2552	25.2105	16.2788	14.4446	16.6272	20.9267	20.0205	23.5468
Solyc06g010060.1.1									Y		4.99313	4.08382	2.86792	2.17346	5.51545	5.25761	3.74292	3.95898	2.57034	2.82612	3.49549	3.48778	3.8325	3.52906
Solyc06g010170.2.1		Y	Y	Y							3.20314	5.11335	13.5675	10.5485	8.90958	9.66087	6.86201	8.70228	10.8811	8.88657	8.40806	13.326	10.1247	8.98575
Solyc06g011350.2.1		Y	Y	Y		Y	Y		Y	Y	11.3994	12.0799	0.330914	0.811425	5.51545	3.87749	8.42156	7.58181	2.14195	2.22949	5.10152	3.58649	2.80287	3.14353
Solyc06g011370.2.1							Y				19.0304	15.4773	9.81712	9.15751	16.8646	16.3643	19.1824	21.0647	10.367	10.4566	8.12464	7.83105	16.7028	15.0949
Solyc06g011380.2.1				Y			Y		Y		10.2689	11.2219	5.18432	5.04243	10.1824	11.7639	8.88942	14.4913	6.68288	5.58943	5.95177	4.54069	8.86622	9.63818
Solyc06g011400.2.1				Y			Y		Y	Y	52.004	56.796	25.3701	24.3138	55.6849	50.8674	67.0606	65.6593	29.1305	27.2877	26.1689	24.3486	56.6866	45.1364
Solyc06g030470.2.1			Y	Y							11.0226	13.0751	3.41945	6.05671	8.59138	7.55782	11.2287	6.98423	2.65602	2.76332	8.78595	10.233	4.23291	5.66429
Solyc06g034390.1.1				Y			Y		Y	Y	2.73209	2.98565	12.3541	14.5477	5.40939	4.00893	3.89887	3.3614	8.73915	10.6136	6.23519	10.233	4.29011	5.33807
Solyc06g035410.1.1			Y			Y				Y	7.25417	10.4326	13.4572	13.8522	15.4857	17.8759	7.17392	11.5408	19.0205	20.6621	11.8091	12.3059	32.8336	30.4567
Solyc06g035530.2.1			Y	Y		Y	Y	Y	Y		0.47105	0.926581	13.1263	14.7216	1.591	1.11724	1.09168	0.373488	22.1906	28.638	0.755781	0.526457	9.72424	7.97745
Solyc06g035610.2.1				Y						Y	1.50736	1.68157	0.551524	0.637548	1.48493	1.05152	1.09168	1.26986	0.685424	1.06764	1.70051	1.28324	2.05925	1.0083
Solyc06g035920.2.1			Y	Y		Y		Y			2.54367	2.1277	1.43396	1.01428	2.22739	1.77444	2.33932	1.7554	1.19949	1.16185	1.0392	1.44776	0.743619	0.860023
Solyc06g036110.1.1				Y			Y		Y	Y	0.56526	0.652038	6.9492	5.85385	1.16673	0.591482	0.779774	0.821674	1.28517	2.4807	2.55076	0.954204	1.37283	0.741399
Solyc06g036170.1.1				Y							19.4073	20.0073	55.2627	48.8884	42.5326	29.7055	29.1635	33.3152	32.0436	31.5897	30.0423	33.8249	31.2892	31.4353
Solyc06g036290.2.1				Y			Y		Y	Y	878.226	954.413	322.752	156.257	907.928	1074.66	663.12	975.141	267.572	151.982	185.639	68.7027	1209.35	1010.88
Solyc06g036790.1.1										Y	0.942101	1.5443	1.10305	0.608569	0.636398	0.854362	1.40359	1.19516	1.02814	0.565224	0.661308	0.9213	1.60164	1.45314
Solyc06g048410.2.1				Y			Y	Y	Y	Y	13.001	16.0607	47.5414	44.5125	8.48531	12.1582	20.586	19.5334	41.8108	41.0415	15.0211	12.1743	22.4802	22.8647
Solyc06g048600.2.1			Y			Y		Y		Y	6.50049	5.31926	6.17707	5.56406	4.03052	6.8349	4.05482	3.62284	14.4796	11.8697	6.14072	5.00134	12.5843	11.3286
Solyc06g048930.2.1		Y	Y	Y	Y	Y	Y		Y	Y	0.37684	0.549085	1.98549	2.08652	5.30332	5.12617	0.779774	1.00842	10.0243	10.1426	1.70051	1.8097	8.58021	6.96915
Solyc06g049030.2.1			Y			Y	Y				2.73209	2.60815	5.95646	4.81059	3.71232	4.53469	2.96314	2.39033	4.88364	4.96141	2.55076	2.27035	5.20533	6.76156
Solyc06g049040.2.1									Y		5.6526	4.56427	3.75036	2.49223	6.57612	6.90062	6.86201	5.04209	4.11254	3.32854	6.99097	4.90263	5.60574	5.2491
Solyc06g049050.2.1			Y	Y		Y	Y		Y		13.3778	11.5994	1.76488	2.34734	6.57612	7.1635	12.6323	9.41191	2.91305	2.4493	5.57388	3.48778	3.08888	4.38908
Solyc06g050250.1.1				Y			Y		Y	Y	4.33366	4.6329	2.2061	1.85469	6.15185	6.90062	7.79774	6.46135	1.45653	1.53866	5.00705	6.21878	4.34731	4.32977
Solyc06g050350.2.1				Y			Y		Y		10.1747	11.016	3.41945	3.68039	7.95498	8.41218	11.2287	9.89744	2.48466	2.73191	7.74675	11.0556	6.00615	6.43534
Solyc06g050500.2.1		Y	Y	Y							1.69578	2.95133	5.29463	5.44814	5.93972	6.63774	5.45842	4.40716	7.88237	6.43727	5.29046	4.44198	7.37898	4.74495
Solyc06g050600.2.1							Y		Y	Y	3.39156	2.91701	2.4267	2.02856	5.40939	4.99473	5.30246	5.04209	3.08441	2.88892	3.40101	3.75101	4.0041	5.30841
Solyc06g050610.1.1									Y		3.20314	3.84359	2.64731	3.30366	6.78825	6.04626	3.74292	5.41558	2.99873	3.10873	3.49549	3.81682	4.91932	4.59667
Solyc06g050700.2.1				Y			Y		Y	Y	18.4652	18.3943	64.418	82.0699	19.3041	14.2613	26.0445	23.2683	43.2674	49.1431	24.8463	37.9378	23.1094	27.4911
Solyc06g050760.1.1						Y	Y				10.0805	8.854	5.29463	5.10039	11.137	8.1493	15.5955	11.0926	4.96932	4.20778	6.51861	7.27169	4.80492	4.95254
Solyc06g050800.2.1				Y			Y		Y	Y	4.23945	4.427	0.772133	0.463672	3.50019	4.46897	4.21078	3.47344	1.37085	1.22465	1.88945	2.92842	3.26048	3.26215
Solyc06g050870.2.1			Y	Y		Y	Y	Y	Y	Y	0	0	15.8839	16.8081	0	0.13144	0	0	4.96932	4.61599	0.0944726	0.131614	2.68847	2.04626
Solyc06g050900.2.1				Y			Y		Y	Y	2.92051	2.23066	0.110305	0.405713	0.636398	1.643	1.7155	1.83009	0.342712	0.47102	1.22814	1.51356	1.48724	1.83867
Solyc06g050980.2.1				Y			Y		Y		200.008	199.284	86.5892	90.387	170.131	190.457	232.061	286.017	130.316	125.48	234.764	303.996	134.309	154.507
Solyc06g051090.1.1							Y		Y	Y	6.12365	7.34401	4.5225	3.2457	10.2884	11.041	10.293	9.7107	4.88364	2.92032	7.46333	6.87685	9.89585	10.2906
Solyc06g051190.1.1			Y					Y	Y		1.22473	1.61294	1.98549	3.3906	1.2728	1.11724	2.33932	1.4566	4.2839	3.83096	3.49549	2.7639	2.74567	3.2325
Solyc06g051240.1.1		Y	Y	Y		Y	Y		Y		1.13052	1.02953	6.06676	4.69467	1.69706	2.69453	0.935729	1.56865	1.97059	2.70051	2.0784	1.57937	3.60369	2.99525
Solyc06g051260.2.1				Y			Y		Y	Y	10.1747	9.84921	2.75762	2.72407	6.57612	6.63774	9.82515	6.424	3.85551	3.23434	6.14072	7.66653	7.03578	7.38433
Solyc06g051320.2.1				Y					Y		47.9529	53.5015	20.4064	16.2575	33.1988	39.6293	36.3375	34.8091	31.4438	27.7274	37.4111	40.2411	33.3484	36.1506
Solyc06g051540.2.1									Y		20.2552	16.4039	34.5254	33.6162	18.5616	15.2471	19.3384	18.2636	39.3262	37.1163	22.2011	24.9738	27.3423	31.1387
Solyc06g051750.2.1							Y	Y	Y		13.0952	10.8787	25.0392	22.1693	5.51545	6.37486	7.17392	8.62758	30.587	35.9859	10.7699	10.7924	13.7283	17.1115
Solyc06g051940.2.1				Y	Y	Y	Y		Y		2.73209	4.59859	1.54427	1.07224	2.96986	2.89169	6.08224	6.64809	0.685424	0.785033	1.79498	3.42197	2.00205	2.4911
Solyc06g051950.2.1				Y			Y		Y	Y	1.78999	2.84838	1.65457	0.637548	2.54559	3.41745	1.09168	2.72646	1.97059	1.00484	1.32262	0.625168	4.34731	3.85527
Solyc06g051960.2.1			Y			Y		Y			45.9745	44.0641	27.5762	26.777	32.4563	33.1887	40.8602	41.868	15.9361	20.7249	37.3167	40.0766	14.4148	17.7046
Solyc06g051980.2.1				Y							4.23945	6.3488	10.0377	12.6061	6.25792	6.90062	4.99055	7.50712	10.4527	11.2103	7.74675	9.70656	8.52301	8.60023
Solyc06g053140.2.1		Y	Y	Y		Y	Y				7.15996	6.89788	1.21335	1.39101	2.43953	2.62881	5.30246	4.40716	1.11381	1.03624	2.83418	4.93554	1.83045	2.34282
Solyc06g053410.1.1				Y			Y		Y	Y	0.65947	1.23544	0.330914	0.463672	0.848531	1.3144	1.40359	1.6807	0.771102	0.565224	0.850253	0.82259	1.48724	0.771055
Solyc06g053480.2.1				Y			Y		Y	Y	114.277	106.076	377.463	428.432	116.673	124.737	104.49	112.644	223.362	252.906	142.276	145.401	177.954	185.676
Solyc06g053610.2.1		Y	Y	Y	Y	Y	Y		Y	Y	0.18842	0.240225	2.75762	2.52121	0.636398	1.24868	0.155955	0.149395	1.5422	1.13045	0.755781	1.54647	1.08683	1.15658
Solyc06g053620.2.1							Y		Y		15.7331	15.9921	8.71408	7.7665	18.6677	15.7071	17.9348	17.1805	10.367	8.22714	13.793	14.7408	13.2707	13.1079
Solyc06g053710.2.1				Y			Y		Y		63.3092	65.0323	157.956	167.414	80.5044	78.9299	70.0237	68.9086	128.003	129.939	115.823	110.655	114.86	117.734
Solyc06g053830.2.1		Y	Y			Y				Y	5.18155	3.67201	6.72859	5.99875	9.75811	8.28074	6.70606	5.52763	7.02559	5.80924	3.96785	5.29748	13.3851	16.4294
Solyc06g053970.2.1				Y			Y		Y		1.31894	1.06385	0.330914	0.463672	1.48493	1.44584	1.09168	1.4566	0.42839	0.690829	1.70051	1.94131	0.686417	0.830367
Solyc06g053980.2.1							Y		Y	Y	16.1099	17.1246	9.70682	10.4036	22.6982	21.9505	24.4849	22.1105	15.5934	18.3698	20.5005	22.1441	20.8213	20.3143
Solyc06g054070.2.1			Y	Y		Y	Y				6.31207	5.9713	19.193	16.0836	8.80351	9.52943	7.9537	5.82642	13.9655	8.91797	6.8965	4.77102	15.044	12.8707
Solyc06g054240.2.1			Y			Y		Y		Y	4.33366	3.60337	6.72859	4.98447	7.00038	6.5063	3.89887	3.69753	18.5064	15.7321	9.73068	8.71945	12.1267	15.688
Solyc06g054250.2.1			Y			Y					41.6408	44.3043	58.3512	61.3495	58.9729	58.6881	43.6673	46.1258	88.0769	90.2788	49.8815	51.5928	99.9309	95.7591
Solyc06g054260.1.1			Y	Y							129.256	113.798	56.5863	56.452	84.7471	78.0756	110.104	98.5636	46.4374	50.2735	80.4906	86.9642	55.1422	61.3878
Solyc06g054350.2.1		Y									0.942101	0.686356	0.772133	0.956323	1.9092	1.44584	1.09168	1.41926	2.14195	0.942039	1.41709	0.756782	1.14403	1.0083
Solyc06g054490.2.1				Y			Y		Y		21.3857	20.6593	10.3686	8.57792	25.4559	18.2702	22.6134	22.8948	10.9668	10.7078	22.1066	24.0525	12.7559	16.2515
Solyc06g054600.2.1			Y	Y	Y	Y	Y	Y	Y		4.7105	5.5938	43.6807	41.0639	7.00038	9.52943	3.43101	3.39874	36.7558	31.7153	18.989	13.1614	22.3658	21.7378
Solyc06g054610.1.1			Y	Y		Y	Y	Y	Y		1.50736	2.40225	10.148	12.5771	2.22739	3.35173	1.87146	1.94214	8.1394	8.13294	4.25127	3.06003	6.80697	7.7402
Solyc06g054620.2.1			Y	Y	Y	Y	Y	Y	Y		7.81943	9.84921	55.4833	59.6397	12.5158	15.7728	7.17392	5.71437	48.5794	46.9136	19.8392	17.2744	35.4077	28.7366
Solyc06g054640.1.1		Y	Y	Y			Y				3.48577	3.74064	0.22061	0.985302	0.954598	1.97161	2.18337	2.27828	0.599746	0.879237	0.850253	2.36906	0.858021	1.51245
Solyc06g054670.1.1			Y	Y		Y	Y	Y	Y		2.16683	2.60815	0.330914	0.260815	1.9092	1.57728	2.49528	1.71805	0.171356	0.376816	0.944726	1.11872	0.629216	0.533807
Solyc06g059710.2.1				Y			Y		Y	Y	0.0942101	0.480449	5.07402	3.3906	1.16673	0.920083	1.55955	0.410837	1.71356	2.00968	2.83418	4.11295	0.40041	0.326215
Solyc06g059730.1.1			Y	Y		Y	Y				2.8263	3.12292	1.10305	0.753466	1.37886	1.643	2.96314	2.39033	0.0856779	0.188408	2.0784	2.7968	0.629216	0.919334
Solyc06g059740.2.1		Y	Y	Y	Y	Y	Y	Y	Y	Y	3.7684	2.71111	813.718	979.912	34.8958	36.4747	5.30246	5.67702	185.921	260.913	41.379	50.2767	252.087	300.8
Solyc06g059870.1.1		Y	Y	Y		Y	Y		Y	Y	6.40628	4.0495	0.551524	0.318774	3.18199	1.51156	3.89887	2.95056	1.02814	0.690829	4.8181	7.76525	1.14403	1.51245
Solyc06g060110.2.1			Y	Y		Y	Y	Y	Y	Y	2.26104	2.71111	59.2337	63.2912	2.01526	2.62881	1.7155	1.56865	27.931	33.6622	3.58996	3.48778	12.2411	9.81612
Solyc06g060620.2.1		Y	Y	Y		Y	Y				11.3994	10.0551	2.64731	2.55019	3.92446	4.00893	7.9537	6.424	1.71356	1.38166	2.92865	3.6852	3.37488	3.2325
Solyc06g061010.2.1							Y			Y	0.847891	1.30408	0.882438	0.376733	1.06066	1.51156	2.33932	0.896372	0.942457	0.785033	0.188945	0.625168	1.88765	2.72835
Solyc06g061020.2.1				Y			Y		Y		27.2267	28.6211	15.2221	11.8816	28.2137	28.5883	35.2458	30.2152	20.7341	17.6789	18.6111	14.7079	22.7662	16.5184
Solyc06g061030.2.1				Y			Y				204.718	203.848	88.9056	89.8074	163.448	169.295	190.265	204.41	109.239	87.2642	130.278	124.836	136.082	134.252
Solyc06g061080.2.1							Y		Y		1.31894	1.88748	3.75036	2.81101	0.530332	1.643	2.02741	0.746977	0.514068	0.753631	0.661308	0.9213	2.34526	1.66073
Solyc06g061200.1.1			Y	Y							0.0942101	13.1437	1.21335	0.144897	1.2728	0.788642	2.18337	0.0373488	0.257034	0.25121	0.0944726	0.164518	0.171604	0.0889678
Solyc06g061250.1.1			Y			Y				Y	1.31894	2.09339	1.54427	1.56489	2.75773	2.82597	2.02741	2.09153	8.05373	7.41071	4.53468	3.32326	3.8897	5.01186
Solyc06g062370.2.1			Y	Y		Y	Y	Y	Y	Y	0.942101	0.960899	118.798	102.5	0.424266	1.38012	0.31191	0.784326	60.7457	55.7373	15.6824	15.7279	20.5353	10.083
Solyc06g062400.1.1				Y			Y				1.78999	2.53952	4.85341	4.54978	2.33346	3.41745	2.02741	2.35298	3.85551	3.42274	3.40101	3.42197	3.31768	4.89323
Solyc06g062430.2.1				Y		Y	Y				0.847891	1.23544	2.64731	2.34734	2.12133	1.643	0.623819	1.04577	4.02686	2.82612	0.850253	0.9213	2.05925	2.07592
Solyc06g062750.2.1		Y	Y	Y	Y	Y	Y	Y		Y	0.56526	0.480449	0.992743	1.10122	1.37886	1.3144	0.155955	0.33614	6.85424	6.68848	0.566835	0.625168	3.43209	3.94424
Solyc06g062790.2.1			Y	Y		Y	Y	Y			10.9284	11.5994	26.4731	21.4738	15.4857	17.6787	11.3847	10.0842	34.6996	29.6428	16.8161	14.7737	36.2657	32.9774
Solyc06g062960.1.1			Y			Y	Y	Y	Y	Y	0.942101	0.480449	1.32366	1.01428	0.530332	0.197161	0.779774	0.298791	2.57034	2.13529	0.0944726	0.164518	2.11645	2.58007
Solyc06g063190.2.1		Y	Y								2.35525	3.22587	1.98549	1.21714	0.742465	1.18296	1.7155	2.05419	1.02814	2.13529	0.755781	1.38195	1.31563	0.830367
Solyc06g063370.2.1			Y								389.088	318.126	200.093	190.453	237.589	216.548	314.405	278.436	141.626	154.589	208.312	234.372	149.239	160.024
Solyc06g064500.2.1				Y					Y	Y	1.60157	1.64725	3.97097	4.05713	1.80313	1.70872	4.21078	1.90479	2.91305	2.54351	3.96785	4.73812	1.37283	1.98695
Solyc06g064720.1.1				Y			Y				1.78999	1.20112	0.330914	0.840405	0.954598	1.44584	2.02741	1.23251	1.11381	0.439618	1.70051	2.20454	1.20123	1.21589
Solyc06g064840.2.1				Y			Y		Y	Y	4.89892	3.74064	0	0.173877	2.96986	2.95741	2.33932	3.54814	1.02814	1.25605	2.7397	2.23744	2.11645	2.96559
Solyc06g064900.2.1							Y			Y	1.13052	1.57862	1.10305	0.724487	1.2728	1.3144	2.02741	2.09153	0.685424	0.408217	0.472363	1.11872	2.00205	1.77936
Solyc06g064960.2.1			Y	Y		Y	Y	Y	Y	Y	0.0942101	0.0343178	0.551524	1.01428	0.318199	0	0	0	2.65602	2.19809	0	0.0329036	4.51891	4.62633
Solyc06g065100.2.1			Y			Y					19.0304	17.3991	31.1059	29.7909	29.6986	25.828	21.2099	19.5334	46.8658	43.1454	17.194	23.3286	56.3434	51.3641
Solyc06g065260.2.1			Y	Y			Y		Y	Y	12.4357	11.3592	1.43396	2.08652	5.72759	6.11198	12.3204	9.78539	2.3133	2.3551	4.91257	6.64652	4.69052	6.37603
Solyc06g065490.2.1		Y									5.36997	5.73107	3.30914	3.21672	2.54559	2.62881	4.52269	3.51079	3.17008	3.29714	3.30654	3.15874	2.68847	2.99525
Solyc06g065530.2.1							Y		Y		9.60943	7.17242	3.97097	4.20202	7.74285	9.33227	8.88942	8.29144	6.85424	6.06045	9.06937	10.1014	6.86417	8.2147
Solyc06g065630.2.1				Y			Y		Y		9.79785	10.0551	23.8258	25.7627	12.728	11.4353	11.6966	10.0842	8.48212	9.38899	14.3598	14.0827	14.3576	19.1281
Solyc06g065750.1.1				Y			Y		Y		5.27576	4.32404	1.98549	1.76775	5.30332	3.35173	3.58696	4.8927	0.599746	0.879237	3.02312	3.94843	2.45966	2.84697
Solyc06g065870.2.1			Y	Y		Y	Y	Y	Y		2.26104	3.01997	8.16255	8.05629	2.65166	2.69453	2.33932	2.80116	12.9374	10.0798	6.80203	7.3704	5.72014	5.9905
Solyc06g065900.2.1							Y		Y		25.7193	25.6697	17.3178	14.8085	32.8806	32.6629	38.3649	36.7886	16.0218	15.0726	30.6091	29.7119	26.5987	20.6405
Solyc06g065970.1.1		Y	Y	Y	Y	Y	Y	Y	Y	Y	242.779	180.718	7.28011	6.28855	67.14	61.7113	151.744	129.302	9.3389	9.6716	64.2414	63.4381	19.3341	26.2455
Solyc06g065990.1.1			Y								9.79785	10.7758	7.39042	6.89711	7.10645	6.57202	11.0728	6.79749	4.71229	3.61115	5.95177	7.27169	4.51891	5.27876
Solyc06g066010.2.1		Y	Y				Y		Y	Y	1.03631	1.33839	1.10305	1.04326	2.75773	3.02313	3.74292	2.01684	0.685424	1.28745	3.7789	3.78391	2.28806	3.55871
Solyc06g066130.1.1				Y			Y		Y	Y	7.15996	6.82924	20.8476	22.0534	5.93972	4.00893	6.70606	7.84326	22.2763	25.8433	17.0051	14.1485	8.46581	10.5872
Solyc06g066170.2.1		Y	Y	Y	Y	Y	Y	Y	Y		0	0.0686356	2.75762	3.44856	0.848531	0.460041	0.31191	0	7.62534	5.93485	0.37789	0.526457	5.72014	4.68564
Solyc06g066340.2.1			Y			Y		Y			13.6605	13.8644	25.3701	26.7191	14.7432	14.5899	12.4764	13.4456	42.1535	39.5657	13.3206	17.8008	27.8571	32.3546
Solyc06g066580.2.1		Y	Y	Y		Y	Y		Y		8.94996	10.0208	0.992743	2.34734	4.45479	4.33753	6.39415	8.1047	2.74169	2.3865	8.21911	10.2659	3.03168	2.96559
Solyc06g066600.2.1							Y		Y	Y	19.1246	23.0959	11.8026	10.9253	25.8802	26.4195	22.1456	23.5298	15.7647	13.848	22.9568	17.8008	28.6579	30.6939
Solyc06g066640.2.1			Y	Y		Y	Y				17.5231	17.4334	6.72859	6.17263	7.42465	10.6467	13.4121	13.6697	5.39771	5.18122	6.14072	8.55493	5.60574	6.40569
Solyc06g066770.1.1				Y			Y		Y	Y	3.95682	2.98565	12.0232	15.6199	4.13659	4.00893	4.8346	3.3614	9.51025	10.6764	3.40101	4.14585	7.49339	5.7236
Solyc06g066800.1.1		Y									9.42101	10.0208	4.96371	5.76691	3.60626	4.86329	7.64179	6.72279	5.22635	5.84064	7.65228	8.42332	5.37693	6.13878
Solyc06g067950.2.1				Y			Y		Y	Y	10.8342	7.75583	1.43396	2.28938	11.8794	11.7639	10.449	11.4661	19.1062	16.3287	10.8643	9.01558	17.8468	16.7556
Solyc06g068170.1.1									Y		13.7547	13.6585	18.4209	18.8077	7.53071	9.98947	10.6049	11.1673	12.2519	12.9373	9.54173	11.6479	12.3555	10.7948
Solyc06g068230.2.1		Y	Y								82.6222	79.5144	40.7025	44.8312	32.6685	39.3007	52.4008	56.2847	45.1523	46.0343	37.6001	45.6702	33.0624	36.7437
Solyc06g068350.1.1									Y	Y	26.7557	32.0872	18.3106	16.1416	48.6845	49.2901	21.8337	32.0826	28.0167	27.8844	27.397	23.3615	44.7887	35.7947
Solyc06g068360.2.1				Y					Y		1.50736	1.99043	0.22061	0.637548	0.848531	1.44584	0.935729	1.12047	0.942457	0.816434	1.51156	1.90841	1.20123	0.860023
Solyc06g068370.2.1									Y		1.41315	1.37271	2.64731	2.4053	0.636398	1.38012	2.65123	1.04577	1.71356	1.19325	2.0784	1.8755	2.00205	1.86832
Solyc06g068450.1.1		Y	Y	Y		Y	Y	Y	Y		0.0942101	0.0343178	5.51524	8.23017	0.424266	0.460041	0.31191	0.112047	4.02686	6.46867	0.566835	0.658072	3.8325	5.39738
Solyc06g068540.2.1				Y					Y		15.0736	13.8644	28.0174	30.5733	13.5765	14.787	16.9991	16.5829	20.7341	24.2732	15.4935	19.6434	18.0184	16.9335
Solyc06g068550.2.1				Y			Y		Y	Y	8.19627	8.30491	19.6342	21.9664	6.36398	7.42638	11.0728	7.58181	3.68415	3.92516	8.69148	9.31171	3.71809	6.79121
Solyc06g068590.2.1			Y								1.22473	1.50998	1.76488	1.59387	1.16673	2.10305	2.02741	1.34456	1.71356	2.2923	1.88945	1.74389	2.63127	3.17319
Solyc06g068620.2.1			Y	Y	Y	Y	Y				14.2257	14.0703	5.40493	6.46242	6.89432	7.4921	15.7514	17.1431	5.8261	5.30682	10.2975	20.2357	7.951	5.87188
Solyc06g068950.2.1			Y	Y		Y	Y				81.8685	73.9206	29.0102	35.8476	49.9573	54.0877	74.2345	73.8386	34.0998	35.5777	42.8906	50.2438	31.232	34.3119
Solyc06g069080.2.1									Y		3.86261	3.91223	4.85341	5.94079	2.22739	2.82597	3.27505	3.84693	5.74042	5.58943	5.38494	6.18587	4.69052	5.10082
Solyc06g069140.1.1									Y		1.41315	1.44135	3.52975	2.34734	1.2728	1.11724	2.65123	1.5313	2.57034	1.75847	1.32262	0.82259	1.94485	1.7497
Solyc06g069150.1.1				Y			Y		Y	Y	11.0226	12.2171	63.9768	67.0875	13.0462	12.0268	12.1645	9.97214	32.9003	36.7081	10.9588	10.7266	20.5353	20.1364
Solyc06g069190.2.1							Y		Y		12.9068	15.0998	6.72859	8.78078	17.1828	16.4958	19.0265	17.554	9.08186	10.9277	18.2332	18.6563	12.0695	14.2349
Solyc06g069220.1.1									Y		5.18155	4.49563	4.08128	2.34734	7.53071	5.65194	3.27505	4.29512	2.74169	2.07249	4.53468	4.44198	3.60369	3.08422
Solyc06g069240.1.1				Y		Y	Y		Y	Y	4.14524	4.11814	0	0.115918	2.96986	3.15457	5.61437	4.55656	1.5422	1.28745	7.08544	7.56782	1.65884	2.60972
Solyc06g069290.2.1									Y		1.97841	2.91701	3.19884	2.81101	0.636398	1.97161	2.02741	2.72646	3.42712	2.57491	2.7397	2.66519	2.40246	2.46144
Solyc06g069300.1.1		Y	Y	Y		Y	Y				6.12365	5.28494	2.97823	1.82571	2.22739	3.15457	4.21078	5.97581	3.76983	2.3551	5.47941	4.83683	2.00205	2.25385
Solyc06g069430.2.1	Y	Y	Y	Y	Y	Y	Y	Y	Y		1.60157	1.57862	38.3861	38.4558	12.3037	14.9842	4.05482	5.07944	39.2405	35.7975	6.61308	6.84394	30.7744	30.0415
Solyc06g069670.2.1			Y								1.78999	1.44135	1.54427	2.02856	1.9092	2.10305	1.7155	2.68912	3.42712	2.2923	2.17287	1.38195	3.8897	3.58837
Solyc06g069730.2.1			Y	Y		Y	Y	Y	Y		4.05103	5.45653	0.441219	0.579589	2.43953	2.76025	3.89887	2.68912	0.257034	0.47102	1.13367	2.89552	0.972424	1.09727
Solyc06g069790.2.1				Y							112.581	105.733	38.3861	47.6422	75.095	79.4557	67.2165	93.6335	48.7508	43.899	64.8082	60.6084	67.7265	62.663
Solyc06g070900.2.1		Y	Y	Y	Y	Y	Y		Y	Y	4.80471	4.90745	1.10305	0.724487	1.9092	1.51156	3.58696	3.66019	0.171356	0.219809	2.55076	2.59938	1.77324	1.57177
Solyc06g071150.2.1				Y			Y		Y	Y	16.6752	13.6242	2.97823	3.41958	8.48531	12.3554	14.9717	12.1384	4.88364	4.20778	11.2422	8.88397	9.89585	11.3582
Solyc06g071180.2.1										Y	13.9431	15.443	13.4572	11.0991	13.4704	15.8386	11.3847	13.1094	11.7379	11.1789	12.187	16.8795	22.1942	25.949
Solyc06g071290.2.1				Y						Y	18.842	26.4934	7.83164	9.12853	13.4704	15.7728	15.1276	14.1552	10.1957	9.45179	11.2422	13.0298	16.9316	17.7046
Solyc06g071380.2.1				Y							1.50736	2.33361	4.74311	4.231	2.12133	3.41745	3.43101	2.27828	3.85551	3.95657	2.7397	3.42197	2.80287	3.52906
Solyc06g071540.2.1				Y			Y		Y	Y	6.50049	7.48128	2.53701	2.55019	5.83365	6.5063	9.20133	8.14205	6.5972	5.36962	7.46333	7.3704	8.0654	6.85052
Solyc06g071590.2.1			Y	Y		Y	Y				3.7684	4.11814	1.21335	1.59387	1.591	2.49737	2.80719	3.1373	2.14195	3.20293	4.44021	4.24456	0.743619	1.95729
Solyc06g071620.2.1				Y			Y		Y		3.86261	3.56905	1.43396	1.85469	4.56086	3.61461	3.27505	4.07102	2.05627	2.4807	3.21207	2.86261	3.66089	3.14353
Solyc06g071640.2.1				Y			Y		Y		15.262	17.2275	6.61829	7.04201	15.4857	15.51	18.7146	16.172	8.99618	9.23199	17.9498	17.2744	9.83865	11.8031
Solyc06g071650.1.1								Y			3.57998	3.29451	4.74311	3.56447	2.86379	2.03733	2.80719	2.80116	7.28263	5.84064	3.58996	4.80392	4.80492	5.36773
Solyc06g071750.2.1				Y			Y		Y	Y	3.29735	3.84359	0.992743	0.492651	3.28806	4.14037	2.96314	5.00474	0.771102	0.659428	1.60603	1.71099	3.03168	3.61803
Solyc06g071780.2.1		Y	Y	Y			Y				4.80471	5.31926	1.54427	1.88367	2.43953	2.56309	5.14651	3.88428	1.45653	1.60147	4.15679	4.93554	2.28806	2.43179
Solyc06g071830.2.1				Y			Y		Y	Y	10.6457	12.2171	2.09579	2.60815	10.2884	11.7639	12.1645	13.9685	1.88491	1.60147	1.41709	0.329036	10.9255	8.15539
Solyc06g071920.2.1				Y							352.534	326.534	179.025	159.358	270.469	315.325	325.478	324.785	156.105	160.618	176.758	169.486	274.91	250.029
Solyc06g072290.2.1			Y	Y		Y	Y		Y		9.23259	13.5212	4.19158	3.2457	9.22778	7.68926	11.3847	9.89744	2.99873	3.04593	10.203	13.5892	3.8897	4.59667
Solyc06g072310.2.1				Y							20.4436	19.0121	8.60377	9.85302	14.9554	16.43	11.8526	13.707	9.85296	7.91313	10.7699	10.6279	10.2391	9.99405
Solyc06g072360.2.1			Y			Y		Y		Y	1.22473	1.47567	0.992743	0.898364	0.848531	2.36593	1.40359	1.12047	12.766	12.1523	2.55076	1.64518	6.23496	5.87188
Solyc06g072430.1.1			Y			Y			Y	Y	14.8852	15.2371	14.5602	9.65016	26.5166	31.48	13.88	25.5466	14.9936	12.8431	11.1478	7.07427	56.0574	47.2419
Solyc06g072480.1.1				Y			Y		Y	Y	85.8254	81.6078	0.882438	1.9706	75.7314	70.3206	87.4906	78.2085	2.99873	2.04109	106.848	108.812	48.1636	62.5147
Solyc06g072700.2.1			Y	Y		Y	Y		Y		104.762	104.12	24.598	27.5015	65.443	52.1161	108.701	94.4552	23.4758	20.4423	54.5107	56.2322	33.9204	35.7058
Solyc06g073190.2.1				Y			Y		Y		48.895	41.6961	150.345	155.185	55.5788	57.8338	43.9793	38.9548	133.915	145.074	61.5016	66.7614	82.9993	80.6049
Solyc06g073260.2.1			Y	Y							41.6408	46.6036	14.8911	17.1848	22.4861	25.4994	36.4934	29.767	18.4208	16.7683	19.2724	21.157	20.5353	22.8054
Solyc06g073290.1.1		Y	Y	Y			Y				18.2768	17.8796	3.97097	5.41916	6.89432	7.09778	9.98111	11.6155	4.45525	4.36478	9.91962	13.293	6.40656	8.12573
Solyc06g073350.2.1		Y							Y		1.97841	2.23066	2.3164	2.63713	1.06066	1.05152	2.65123	1.79274	1.88491	2.26089	1.88945	2.59938	1.88765	2.10557
Solyc06g073500.2.1				Y							6.02944	6.10857	11.9129	13.7073	8.06105	8.34646	5.45842	7.02158	12.1663	12.8117	7.74675	8.19299	11.1543	9.31197
Solyc06g073730.1.1			Y	Y			Y		Y	Y	3.48577	3.4661	16.4354	18.5179	4.45479	4.33753	4.52269	4.59391	13.1087	17.6475	8.69148	10.8253	8.69462	8.74851
Solyc06g073750.2.1				Y			Y		Y	Y	7.44259	6.86356	19.193	20.5175	8.27318	7.75498	4.67864	6.12521	1.11381	1.35026	22.4845	25.0396	6.63537	6.04981
Solyc06g073820.1.1				Y			Y		Y	Y	22.9873	22.9929	8.60377	6.40446	15.6978	16.8244	17.311	22.372	6.93991	6.87689	9.73068	8.85106	16.0164	15.3321
Solyc06g073920.2.1			Y	Y			Y		Y		12.6241	14.8939	2.64731	4.5208	8.37925	8.1493	10.6049	9.15046	1.5422	1.09905	10.9588	10.1343	6.74977	6.13878
Solyc06g074000.1.1						Y				Y	4.14524	4.18677	3.19884	2.08652	3.39412	4.73185	3.58696	3.0626	1.88491	2.5121	4.53468	4.83683	5.37693	8.12573
Solyc06g074030.1.1									Y		3.20314	2.8827	4.96371	6.14365	2.65166	2.82597	2.65123	3.0626	5.99746	6.34306	4.06232	4.24456	4.0613	3.55871
Solyc06g074090.2.1							Y		Y		71.317	80.3723	156.853	146.201	60.1397	67.6918	58.4831	58.3762	118.578	118.195	118.185	107.2	112.916	115.51
Solyc06g074120.2.1	Y	Y	Y								4.80471	4.70154	2.97823	2.83999	1.48493	1.77444	2.49528	1.79274	2.3133	2.3237	2.26734	2.13873	1.48724	1.54211
Solyc06g074150.2.1			Y	Y		Y	Y	Y	Y	Y	5.36997	6.96652	40.3715	41.5566	6.25792	6.44058	3.74292	4.59391	19.3632	18.2756	11.7146	6.18587	12.3555	14.2645
Solyc06g074160.1.1			Y	Y		Y	Y	Y	Y	Y	5.84102	5.25063	31.3266	31.124	5.93972	4.40325	4.67864	4.07102	13.1087	12.8431	9.82515	6.05426	10.8683	12.9596
Solyc06g074170.2.1			Y	Y		Y	Y		Y		2.92051	3.87791	16.5457	14.9824	6.68218	5.38905	4.67864	4.6686	10.5384	9.10638	5.57388	5.36328	8.86622	9.87543
Solyc06g074180.1.1			Y	Y	Y	Y	Y	Y	Y		1.41315	1.47567	10.148	7.82446	2.86379	2.10305	0.623819	1.15781	8.91051	7.88173	1.60603	1.94131	6.12055	6.43534
Solyc06g074200.2.1		Y	Y	Y		Y					62.2728	63.1791	22.9434	23.1836	29.1683	28.4568	48.5019	43.1006	17.6497	20.6935	28.6252	40.5372	18.5333	22.6571
Solyc06g074350.2.1			Y	Y		Y	Y	Y	Y	Y	0	0	0.110305	0.260815	0	0	0	0	0.599746	0.188408	3.1176	1.77679	7.37898	6.49465
Solyc06g074590.1.1				Y			Y			Y	0.65947	1.23544	2.2061	4.05713	2.01526	1.44584	0.935729	1.00842	1.79924	2.5121	1.79498	2.04002	1.37283	1.77936
Solyc06g074620.2.1				Y			Y		Y	Y	1.13052	1.26976	0.551524	0.492651	1.9092	1.3144	2.65123	1.90479	0.685424	0.439618	2.45629	2.59938	1.20123	1.39383
Solyc06g074630.2.1			Y			Y		Y		Y	5.08734	5.45653	3.75036	2.81101	2.75773	3.41745	2.18337	5.00474	7.28263	7.91313	2.83418	3.09294	12.0123	14.1162
Solyc06g074730.2.1										Y	184.746	190.67	141.631	136.667	244.377	238.301	168.899	202.767	275.283	308.863	322.813	299.554	305.856	305.219
Solyc06g074820.2.1			Y	Y			Y		Y		935.223	731.793	292.087	244.877	572.546	511.763	685.733	637.433	390.349	374.115	416.53	359.208	442.281	383.896
Solyc06g074910.2.1			Y	Y		Y	Y	Y	Y		0.47105	0.549085	2.2061	1.56489	0.106066	0.657202	0.467864	0.33614	1.79924	1.31886	2.0784	1.8755	2.63127	2.31316
Solyc06g074930.1.1			Y			Y				Y	2.63788	2.29929	2.2061	2.1155	1.48493	1.3144	2.33932	1.56865	1.11381	0.659428	1.98392	1.61228	0.572014	0.919334
Solyc06g075030.1.1							Y		Y		20.8204	18.2571	13.2366	9.44731	24.2892	20.7676	23.2373	22.5213	11.5665	10.5822	17.8553	17.7679	13.7855	11.5065
Solyc06g075150.2.1									Y	Y	2.44946	3.32883	4.74311	4.86855	2.43953	2.03733	3.1191	3.3614	1.62788	2.98312	3.68443	4.90263	1.77324	2.16488
Solyc06g075170.1.1			Y			Y		Y		Y	10.7399	8.23627	10.148	11.5918	6.57612	5.71766	11.0728	9.15046	2.22763	4.30198	8.69148	8.19299	2.97447	2.84697
Solyc06g075250.2.1		Y	Y	Y		Y	Y				6.5947	6.45175	1.43396	1.21714	2.33346	2.43165	4.05482	4.51921	0.257034	0.628026	2.0784	3.55359	1.02963	2.16488
Solyc06g075360.2.1				Y			Y		Y		17.9941	18.36	46.328	40.4553	22.6982	17.6787	19.1824	14.7901	42.3249	42.329	38.8282	35.3384	23.853	29.2704
Solyc06g075370.2.1									Y		14.4141	13.4869	23.7155	24.5166	10.9248	10.7124	10.9168	13.4082	20.3057	18.5268	11.0533	13.655	19.9061	18.7722
Solyc06g075410.2.1		Y									3.67419	3.84359	3.08853	3.3906	1.48493	2.10305	2.96314	3.69753	2.22763	3.92516	3.40101	3.29036	3.26048	4.00355
Solyc06g075500.2.1		Y	Y	Y		Y	Y	Y	Y		5.18155	5.49085	0.992743	1.10122	2.33346	2.23449	4.05482	3.3614	0.342712	0.25121	1.13367	0.789686	1.14403	1.09727
Solyc06g075510.2.1			Y	Y		Y	Y		Y	Y	18.371	18.6346	1.87518	2.98489	9.54598	11.7639	16.8431	16.0227	3.85551	3.26574	9.91962	10.0685	4.80492	6.40569
Solyc06g075550.2.1						Y	Y				6.78312	6.79493	12.2438	9.07057	5.51545	5.45478	4.52269	4.03367	12.509	10.9277	6.80203	4.6394	9.60984	8.77816
Solyc06g075630.2.1		Y	Y				Y		Y	Y	1.50736	1.23544	1.10305	0.811425	3.28806	2.36593	2.33932	2.05419	1.5422	1.38166	1.51156	2.10583	3.14608	2.758
Solyc06g076020.2.1				Y			Y		Y	Y	146.402	154.053	41.3643	13.6493	182.646	194.795	115.718	165.157	30.073	16.2973	31.3649	10.1343	179.898	157.71
Solyc06g076030.2.1		Y	Y	Y	Y	Y	Y				3.7684	4.28973	0.661829	0.492651	0.954598	0.985803	3.27505	2.20358	1.62788	2.07249	2.0784	3.6852	0.629216	0.682087
Solyc06g076050.2.1				Y		Y	Y		Y	Y	2.35525	2.81406	0.772133	0.753466	2.54559	2.69453	5.30246	3.54814	0.942457	0.753631	1.98392	3.32326	1.88765	1.60142
Solyc06g076140.2.1		Y	Y	Y		Y	Y				51.4387	40.9068	11.6923	9.33139	21.7436	16.2986	40.7042	25.6213	33.1574	41.4811	18.4222	19.6434	13.4995	14.7983
Solyc06g076210.1.1				Y			Y		Y		2.26104	0.857945	0.330914	0.55061	2.12133	1.51156	1.87146	1.606	0.42839	0.314013	0.755781	2.00712	0.686417	1.0083
Solyc06g076270.2.1				Y			Y		Y	Y	1.60157	3.19156	20.1858	16.3444	3.18199	2.30021	4.05482	4.03367	3.08441	2.3865	3.02312	2.731	1.77324	2.37248
Solyc06g076310.1.1							Y		Y	Y	3.39156	3.12292	1.87518	1.62285	6.89432	3.15457	4.21078	3.73488	2.05627	1.63287	5.76283	3.52068	3.60369	4.5077
Solyc06g076400.2.1				Y		Y	Y		Y		2.54367	3.60337	1.32366	1.01428	4.13659	2.49737	5.30246	6.46135	1.02814	0.502421	3.96785	5.03425	1.83045	1.86832
Solyc06g076420.1.1		Y	Y	Y	Y	Y	Y		Y	Y	0	0.171589	0.551524	1.01428	3.28806	2.10305	0.31191	0.149395	4.2839	3.83096	0.472363	0.723879	6.17775	3.64768
Solyc06g076520.1.1				Y			Y		Y	Y	65.3818	60.8112	12.3541	10.0559	67.8825	55.5993	77.6655	77.3494	15.3364	10.3624	12.9427	12.5034	62.9216	45.3736
Solyc06g076560.1.1				Y			Y		Y	Y	12.7184	9.36876	2.75762	1.88367	10.6066	8.01786	11.5407	9.82274	3.59847	2.00968	1.70051	1.18453	13.2707	7.7402
Solyc06g076570.1.1							Y				28.9225	26.459	15.8839	15.1563	33.517	27.3396	36.1815	34.3983	13.7085	14.3504	22.5789	29.1855	26.4271	26.3938
Solyc06g076670.2.1				Y			Y		Y	Y	134.815	149.797	57.7997	42.0202	168.858	174.356	149.405	200.489	54.1485	37.4304	58.8564	42.314	162.509	148.517
Solyc06g076790.1.1			Y	Y							17.6173	15.3401	7.05951	5.96977	9.86418	7.42638	15.2836	10.5324	4.88364	5.40103	8.03017	8.2259	7.09298	6.55396
Solyc06g076870.2.1			Y						Y	Y	14.4141	13.5555	14.2293	21.0391	8.06105	8.21502	10.1371	10.0842	2.57034	2.04109	19.3669	16.1557	4.46171	6.90984
Solyc06g076910.1.1			Y			Y	Y	Y		Y	0.65947	0.857945	1.32366	0.811425	0.954598	0.788642	0.31191	0.298791	2.65602	3.61115	0.283418	0.394843	1.88765	2.16488
Solyc06g081980.1.1			Y	Y		Y	Y				92.3259	79.0339	225.463	199.002	109.248	112.447	75.1702	86.1264	303.129	332.854	76.0504	66.6627	210.044	166.637
Solyc06g082040.1.1			Y								4.89892	4.66722	2.2061	2.72407	1.591	3.35173	3.89887	4.48186	2.39898	2.79472	5.38494	4.37618	2.63127	2.07592
Solyc06g082050.1.1						Y					1.22473	1.26976	0.772133	0.985302	1.37886	0.985803	1.55955	1.606	0.342712	0.533822	1.88945	1.74389	1.02963	0.563463
Solyc06g082300.2.1			Y	Y							7.91364	7.85878	2.4267	3.50652	4.03052	4.46897	5.61437	5.45293	3.68415	4.6788	4.44021	5.10006	2.57406	3.46975
Solyc06g082590.1.1									Y		13.1894	11.8396	8.71408	7.41874	18.4556	15.4442	15.9074	12.4372	7.88237	5.40103	12.6593	9.54204	15.9592	11.5065
Solyc06g082710.2.1				Y							31.0893	35.8964	13.8984	14.113	22.9103	24.5136	29.3195	25.5093	19.1062	19.5002	25.6021	23.9867	18.9337	22.0344
Solyc06g082940.2.1		Y	Y	Y		Y					85.9196	75.7051	38.717	38.6586	36.0626	37.5262	63.1617	57.5172	34.5282	33.882	39.0172	44.1237	28.5435	30.3973
Solyc06g082950.2.1			Y			Y					24.0236	21.8604	13.2366	12.635	11.5612	13.9327	18.4027	18.7118	8.73915	11.2417	10.1086	14.4118	9.78144	8.51126
Solyc06g083130.2.1			Y			Y		Y		Y	0.65947	1.40703	1.43396	0.666528	0.424266	1.44584	1.55955	0.709628	3.85551	2.2923	0.755781	1.31614	5.43414	3.73665
Solyc06g083270.2.1				Y							28.0746	28.5181	15.0014	11.1571	16.6524	23.2649	23.0813	22.1479	15.7647	10.9905	11.6201	8.68655	25.7406	22.5385
Solyc06g083370.2.1										Y	6.50049	7.34401	4.85341	5.96977	5.93972	7.75498	6.39415	6.90953	10.6241	10.3624	8.78595	7.66653	10.8683	13.0486
Solyc06g083470.2.1		Y	Y	Y	Y	Y	Y	Y	Y		0	0.137271	4.85341	6.54936	0.212133	0.985803	0	0.0746977	7.02559	7.0967	0.188945	0.592264	12.1267	9.90509
Solyc06g083490.2.1		Y	Y	Y			Y		Y		12.5299	9.4374	1.21335	2.52121	4.87905	4.46897	7.01797	5.00474	1.11381	1.03624	4.8181	5.65942	4.23291	2.78766
Solyc06g083580.2.1		Y	Y	Y		Y	Y		Y		84.318	85.2454	14.4499	16.895	31.8199	32.4	53.9604	53.1474	16.1931	14.6016	18.8	19.0183	20.7641	23.4875
Solyc06g083680.2.1			Y								44.1845	34.0776	24.1567	15.8518	31.6078	26.6167	38.3649	26.6671	17.1356	16.7683	23.8071	20.828	18.1329	18.8019
Solyc06g083860.2.1		Y	Y		Y						25.4367	21.7575	10.479	13.1567	8.37925	8.21502	21.5218	15.0142	19.4489	19.9084	7.84122	10.7266	11.1543	11.4175
Solyc06g083900.2.1			Y	Y		Y	Y	Y	Y	Y	3.39156	3.26019	23.2743	19.3293	3.50019	3.28601	2.02741	1.97949	10.5384	12.1837	7.36886	10.6937	10.0102	7.59192
Solyc06g083960.1.1				Y			Y		Y		2.16683	2.02475	0.330914	0.753466	0.848531	2.23449	1.09168	1.5313	0.771102	0.628026	1.51156	1.08582	0.972424	1.33452
Solyc06g084050.2.1		Y	Y	Y							20.3494	15.6832	5.84615	6.92609	8.16711	8.54362	14.3478	11.242	5.99746	7.2851	9.35279	11.2201	5.60574	7.56227
Solyc06g084140.2.1			Y	Y		Y	Y		Y	Y	0.18842	0.171589	5.40493	7.4767	0.530332	0.328601	0.779774	0.186744	1.45653	1.69567	0.566835	0.394843	0.743619	1.36417
Solyc06g084250.2.1				Y			Y		Y		40.9814	42.2795	17.3178	19.0105	34.8958	38.512	41.484	41.4946	20.0486	17.7731	39.0172	38.234	31.804	31.4946
Solyc06g084380.2.1							Y		Y	Y	2.63788	2.64247	5.40493	5.10039	2.43953	2.43165	1.24764	1.83009	3.08441	4.30198	2.0784	1.08582	2.45966	2.16488
Solyc07g005140.2.1			Y								72.636	71.1751	131.373	139.275	125.158	128.22	96.692	114.885	151.479	164.197	98.7238	105.719	145.921	144.158
Solyc07g005190.2.1			Y	Y		Y					4.52208	3.63769	0.992743	2.02856	3.39412	2.23449	3.43101	2.87586	2.39898	1.66427	3.7789	6.51491	1.02963	1.7497
Solyc07g005260.1.1				Y			Y				1.50736	1.75021	0.661829	0.840405	1.48493	1.18296	0.935729	1.94214	0.342712	1.31886	1.32262	1.71099	1.31563	0.830367
Solyc07g005390.2.1			Y	Y							281.405	244.755	110.856	117.657	153.69	149.185	206.172	195.148	88.591	102.054	133.395	157.838	105.251	117.408
Solyc07g005400.2.1		Y	Y			Y		Y	Y	Y	15.1678	12.3887	11.2511	12.751	5.62152	4.14037	7.17392	6.83484	2.14195	1.78987	7.27439	7.43621	1.31563	1.42349
Solyc07g005440.1.1		Y	Y	Y		Y	Y		Y	Y	29.2051	27.4542	2.53701	2.78203	8.69745	9.66087	15.4395	13.7444	2.3133	3.64255	7.84122	10.3317	5.37693	6.34637
Solyc07g005470.2.1				Y			Y			Y	1.60157	1.30408	0.882438	0.434692	1.2728	1.11724	1.87146	1.26986	1.02814	1.03624	0.661308	1.54647	0.915223	1.95729
Solyc07g005620.2.1		Y									1.78999	1.5443	1.54427	0.898364	0.636398	0.722922	1.24764	1.04577	1.79924	1.47586	1.41709	1.61228	1.25843	1.69039
Solyc07g006020.2.1								Y			2.16683	2.40225	3.08853	3.21672	2.33346	1.57728	3.89887	1.71805	4.54093	4.52179	1.98392	2.00712	4.51891	3.85527
Solyc07g006160.2.1				Y			Y		Y	Y	28.6399	31.4694	13.5675	12.2004	26.0923	25.2365	33.5303	27.302	19.6202	19.4688	23.8071	23.2957	27.2279	25.2372
Solyc07g006220.1.1			Y	Y			Y				52.6634	45.5741	13.4572	15.6199	28.3197	22.1477	45.6948	30.2899	14.0512	15.7949	22.1066	24.8422	19.6773	18.8315
Solyc07g006300.2.1				Y							26.1904	27.4542	12.3541	12.0555	11.3491	20.1761	16.8431	15.7239	7.53966	7.1595	10.9588	10.5291	12.9847	16.6666
Solyc07g006380.2.1		Y	Y	Y	Y	Y	Y	Y	Y	Y	23.1757	30.4742	2124.47	2302.16	185.616	214.511	61.7581	45.4535	1721.96	1749.52	1324.51	1713.65	566.866	591.162
Solyc07g006410.1.1						Y					3.20314	2.64247	3.97097	2.05754	4.24266	3.08885	4.99055	3.80958	0.514068	1.09905	3.96785	4.08004	1.88765	1.86832
Solyc07g006500.2.1				Y							21.8567	26.2188	55.4833	64.7981	30.5471	31.4142	31.3469	35.22	23.9898	28.1984	33.2543	35.4701	35.9225	34.7271
Solyc07g006550.2.1		Y									5.6526	6.48607	5.18432	4.14406	2.22739	2.69453	6.5501	3.88428	5.31203	4.39618	5.76283	4.37618	3.77529	3.58837
Solyc07g006560.2.1			Y	Y		Y	Y		Y	Y	0.28263	0.30886	3.86067	3.76733	0.212133	0.985803	0.935729	0.224093	4.62661	5.74644	3.30654	3.6852	1.37283	1.77936
Solyc07g006570.2.1			Y	Y		Y	Y	Y	Y		2.92051	4.6329	14.2293	12.4322	3.28806	3.68033	5.92628	2.31563	8.39644	8.32135	10.4865	12.1743	8.40861	7.38433
Solyc07g006600.1.1		Y	Y	Y		Y	Y		Y		6.02944	4.18677	0.551524	0.956323	1.80313	1.84017	3.74292	2.05419	0.257034	0.188408	1.51156	1.90841	0.915223	1.30486
Solyc07g006630.2.1				Y			Y		Y		62.3671	42.4511	31.6575	17.6485	66.0794	59.6739	61.9141	56.1353	36.2418	23.394	38.1669	30.5016	37.3525	26.5124
Solyc07g006680.1.1		Y			Y			Y	Y		1.69578	1.64725	0.772133	1.18816	0.212133	0.262881	1.55955	0.97107	0.771102	1.35026	0.188945	0.559361	0.629216	1.12693
Solyc07g006700.1.1				Y			Y		Y	Y	2.07262	2.33361	0.551524	0.289795	2.86379	2.10305	1.55955	2.16623	0.771102	0.502421	2.26734	3.02713	1.37283	2.46144
Solyc07g006890.1.1			Y	Y		Y	Y	Y	Y		0.75368	0.720674	2.64731	3.65141	0.742465	0.591482	1.09168	0.410837	4.54093	4.01937	0.850253	0.658072	6.80697	5.45669
Solyc07g007020.2.1		Y	Y	Y		Y	Y				3.29735	4.08382	0.772133	0.869384	1.2728	1.77444	2.96314	2.53972	1.19949	0.753631	1.13367	1.51356	1.43004	1.24555
Solyc07g007330.1.1				Y							20.632	18.3257	38.717	43.817	28.744	23.8564	26.5123	30.0658	28.9591	30.7419	18.989	23.6248	27.6283	23.7544
Solyc07g007570.1.1			Y			Y				Y	2.73209	2.81406	2.86792	2.81101	2.96986	1.70872	2.33932	3.77223	2.48466	1.75847	2.17287	2.7968	1.08683	1.21589
Solyc07g007580.2.1						Y					4.42787	6.96652	5.40493	4.49182	7.63678	6.1777	7.48583	8.25409	3.42712	2.79472	5.66835	3.94843	3.14608	3.91459
Solyc07g007750.2.1			Y	Y		Y	Y				63.4034	55.6635	164.244	178.658	110.945	102.063	68.3082	51.0932	178.639	189.695	149.739	167.183	163.482	180.812
Solyc07g007760.2.1		Y	Y	Y		Y	Y				262.092	204.603	53.939	51.8733	79.2316	65.6545	160.477	100.244	42.3249	58.0296	75.956	97.3617	51.5957	70.2549
Solyc07g007980.2.1		Y	Y	Y	Y	Y	Y	Y	Y		5.08734	5.52517	0.330914	0.289795	2.01526	1.90589	5.14651	4.07102	1.19949	1.38166	2.83418	3.09294	0.686417	0.652431
Solyc07g008010.2.1		Y	Y	Y		Y	Y	Y	Y	Y	19.3131	15.1685	0.992743	0.956323	6.89432	7.62354	9.82515	9.67335	3.25576	3.89376	7.74675	7.69944	2.97447	3.88493
Solyc07g008030.1.1				Y			Y		Y	Y	19.3131	19.3209	8.05225	6.14365	15.6978	18.4017	15.9074	18.7118	13.023	10.7392	16.8161	16.4847	18.3045	16.1032
Solyc07g008180.2.1			Y			Y		Y		Y	61.8018	76.6317	62.984	62.0161	44.0176	53.2991	50.9972	53.8944	14.2225	12.1523	66.9811	62.3194	22.3086	24.4365
Solyc07g008220.1.1		Y	Y			Y	Y		Y	Y	2.16683	1.61294	2.86792	2.89795	0.530332	0.525761	0.935729	0.933721	0.771102	0.690829	1.41709	2.27035	0.572014	0.266904
Solyc07g008240.2.1			Y	Y		Y	Y	Y	Y	Y	0.0942101	0.0343178	7.16981	7.7665	0	0.262881	0	0	3.85551	3.57975	0.37789	1.05291	0.686417	1.27521
Solyc07g008300.1.1		Y	Y	Y			Y				6.68891	6.45175	1.87518	1.1302	1.2728	2.95741	3.89887	4.51921	3.08441	1.85268	1.60603	2.56648	1.88765	3.17319
Solyc07g008430.1.1			Y			Y				Y	2.92051	3.0886	3.30914	3.91223	2.65166	2.16877	2.80719	2.42767	0.257034	0.502421	2.26734	4.14585	1.14403	1.33452
Solyc07g008570.2.1			Y	Y		Y	Y	Y	Y		3.39156	5.0104	22.5022	20.1118	9.54598	5.12617	6.08224	4.93005	32.4719	26.1887	11.0533	12.0427	19.1625	12.2776
Solyc07g008650.2.1						Y	Y				2.35525	2.19634	2.09579	2.72407	2.01526	2.36593	1.40359	1.08312	2.65602	2.60631	2.17287	2.17164	2.17365	2.99525
Solyc07g008670.2.1				Y			Y		Y	Y	169.39	170.971	54.6009	64.3054	152.099	154.837	155.331	163.663	71.1127	75.4888	143.976	181.266	138.771	154.152
Solyc07g008710.2.1				Y			Y		Y	Y	0.47105	0.446132	5.95646	4.14406	1.48493	0.525761	1.40359	0.597581	2.74169	2.26089	4.44021	5.92264	0.629216	0.474495
Solyc07g008810.1.1				Y			Y		Y	Y	1.97841	2.02475	0.882438	0.608569	1.37886	1.51156	2.33932	1.83009	1.11381	1.13045	1.41709	1.44776	2.68847	2.63938
Solyc07g009410.2.1			Y	Y		Y	Y	Y	Y	Y	0.28263	0.240225	4.6328	3.94121	0.530332	0.460041	0.467864	0.448186	3.94119	4.52179	1.51156	1.74389	1.65884	1.69039
Solyc07g009470.1.1		Y	Y	Y		Y					2.73209	2.98565	1.43396	1.30408	0.848531	1.11724	2.65123	1.56865	1.02814	0.596625	0.37789	0.723879	0.80082	0.830367
Solyc07g014640.2.1				Y							9.79785	8.75104	3.86067	4.31794	7.31858	7.1635	10.449	6.79749	4.88364	4.55319	10.2975	8.02847	5.77734	4.74495
Solyc07g014670.2.1			Y	Y		Y	Y	Y	Y		4.89892	5.0104	17.9797	17.3587	4.56086	5.38905	6.86201	5.11679	27.0742	22.8602	6.70755	6.35039	21.7937	18.535
Solyc07g014680.2.1			Y	Y		Y	Y	Y	Y	Y	0	0	6.61829	6.95507	0	0.197161	0	0	7.02559	5.96625	0.755781	1.38195	2.51686	3.55871
Solyc07g014730.2.1							Y				3.01472	3.70632	5.84615	5.62202	3.07593	3.48317	2.65123	2.61442	6.51152	4.61599	2.64523	5.42909	2.97447	3.14353
Solyc07g017220.2.1										Y	10.0805	12.423	6.28737	5.96977	10.1824	7.4921	13.724	8.59023	9.16754	6.28026	12.3759	11.0227	10.8111	13.6121
Solyc07g017600.2.1		Y	Y	Y							12.6241	12.2171	3.30914	5.73794	4.45479	6.04626	9.35729	7.84326	3.76983	3.04593	4.15679	3.55359	4.46171	5.51601
Solyc07g017610.2.1				Y			Y		Y	Y	2.73209	3.74064	33.8636	34.6594	3.71232	3.81177	2.65123	4.48186	5.74042	5.77784	2.55076	2.731	3.14608	2.90628
Solyc07g017670.1.1				Y							1.60157	3.22587	0.882438	1.10122	1.06066	1.643	1.24764	1.71805	1.19949	0.973441	0.472363	1.21743	1.37283	1.72005
Solyc07g018010.2.1			Y	Y		Y	Y	Y	Y		1.31894	1.61294	5.84615	5.88283	0.848531	1.3144	0.623819	1.04577	5.14068	4.01937	2.0784	2.30325	5.26253	5.2491
Solyc07g018180.1.1				Y			Y		Y		9.42101	13.2124	4.30189	5.15835	12.1976	12.2897	11.6966	14.3793	4.19822	2.79472	10.1086	10.7595	8.1226	9.99405
Solyc07g020960.2.1				Y			Y		Y	Y	8.29049	10.8101	3.30914	2.43428	7.53071	6.90062	9.20133	9.4866	5.65474	6.02905	9.54173	10.9898	5.09093	6.64293
Solyc07g021630.2.1				Y			Y	Y	Y	Y	0.65947	0.892263	2.64731	3.65141	0.530332	0.197161	1.09168	0.97107	1.5422	1.85268	1.51156	0.855493	1.37283	0.771055
Solyc07g021750.1.1				Y			Y		Y		18.371	13.6585	7.83164	5.44814	16.1221	12.3554	14.9717	12.8853	7.62534	6.37447	11.3367	11.3517	10.9827	9.6975
Solyc07g022830.2.1			Y								3.01472	3.94655	4.5225	4.69467	4.45479	5.91482	5.61437	5.04209	5.91178	4.64739	5.29046	4.47489	6.86417	8.15539
Solyc07g022900.2.1	Y	Y	Y	Y			Y				5.46418	6.14289	1.10305	1.39101	2.01526	1.77444	3.43101	2.53972	1.37085	1.44446	1.88945	2.50067	1.88765	2.07592
Solyc07g023990.1.1				Y			Y		Y	Y	7.72522	8.92263	3.41945	3.99917	10.8188	7.95214	11.0728	12.2131	4.19822	3.98797	10.9588	9.57494	6.69257	8.39263
Solyc07g025530.1.1							Y				4.33366	2.77974	1.32366	2.23142	2.12133	2.56309	5.77033	2.95056	2.39898	2.10389	2.26734	2.07293	2.80287	2.2242
Solyc07g032740.2.1		Y	Y	Y	Y	Y	Y	Y	Y	Y	70.0923	61.5662	990.647	1040.19	154.008	149.251	59.2628	67.8255	576.955	630.57	211.43	174.586	343.838	361.565
Solyc07g038120.1.1			Y								4.23945	5.86835	2.2061	2.95591	2.75773	2.62881	4.8346	4.8927	2.39898	2.26089	9.16384	6.81104	2.40246	2.66904
Solyc07g038160.2.1		Y	Y	Y		Y	Y		Y	Y	4.42787	4.90745	11.4717	14.171	1.69706	2.30021	4.52269	3.92163	3.5128	2.98312	2.26734	2.66519	2.17365	1.86832
Solyc07g039310.1.1		Y	Y	Y	Y	Y	Y				4.61629	4.70154	0.551524	0.956323	0.954598	1.18296	2.96314	2.72646	0.514068	0.659428	0.472363	1.48066	0.80082	0.978646
Solyc07g040680.2.1						Y					29.6762	33.5971	23.164	21.9664	25.0317	21.2276	43.0435	44.8933	12.2519	9.70301	22.8624	25.4345	14.758	17.5267
Solyc07g040750.1.1				Y			Y		Y	Y	1.97841	1.75021	0.330914	0.376733	1.69706	1.38012	1.09168	1.7554	0.514068	0.502421	0.566835	0.987107	1.14403	1.0083
Solyc07g040890.1.1	Y	Y				Y	Y	Y	Y	Y	1.22473	1.13249	0.882438	0.52163	5.30332	5.06045	3.74292	3.95898	0.942457	0.533822	3.96785	4.44198	1.20123	1.57177
Solyc07g041210.2.1							Y				24.683	29.4104	14.4499	13.8522	25.1377	24.7108	30.2552	30.2526	16.1075	14.476	27.1136	28.9881	22.0798	21.3226
Solyc07g041230.2.1			Y	Y		Y	Y	Y	Y		1.8842	1.50998	0.551524	0.260815	1.591	1.3144	2.49528	1.15781	0.514068	0.157007	0.755781	0.954204	0.457611	0.474495
Solyc07g041290.1.1		Y						Y			5.08734	5.07904	4.08128	5.10039	2.01526	2.82597	4.67864	4.55656	6.51152	5.14982	4.06232	4.6394	5.72014	6.79121
Solyc07g041340.1.1				Y							10.8342	9.54035	5.51524	4.60774	5.72759	7.1635	9.6692	9.41191	6.25449	7.44211	7.65228	7.53492	6.52096	7.35468
Solyc07g041520.2.1			Y								3.39156	1.26976	0.882438	1.18816	0.848531	1.05152	0.935729	0.859023	0.599746	0.847835	0.472363	0.9213	0.972424	0.830367
Solyc07g042170.2.1			Y	Y		Y	Y	Y	Y		17.1462	16.9873	90.2293	90.4449	12.728	14.1956	16.2193	12.0263	56.2047	65.1577	41.8514	43.1037	58.2311	44.6025
Solyc07g042270.2.1			Y			Y				Y	38.2493	43.7552	42.0261	43.2374	65.443	73.738	45.3828	43.0259	125.604	130.347	47.1418	57.9103	98.7869	99.0509
Solyc07g042390.1.1			Y	Y			Y		Y	Y	27.3209	26.9395	5.73585	6.31752	19.8344	16.5615	22.1456	17.4793	7.3683	7.47351	17.4774	22.7693	11.6119	14.4424
Solyc07g042490.1.1				Y			Y		Y	Y	3.20314	2.47088	5.51524	8.66486	2.86379	2.56309	4.36673	2.35298	0.942457	2.22949	2.55076	3.55359	2.00205	1.95729
Solyc07g042550.2.1			Y	Y		Y	Y	Y			19.5957	22.1007	59.6749	62.7985	37.6536	41.7323	19.4944	21.7744	96.9018	123.156	18.0443	27.9022	100.446	110.557
Solyc07g043050.1.1				Y							9.89206	12.6633	25.0392	27.9652	14.319	14.7213	15.2836	15.1636	28.2737	28.952	15.588	16.5505	21.0501	19.4543
Solyc07g043120.1.1			Y	Y	Y	Y	Y	Y	Y		0.37684	0.343178	4.6328	4.72365	0.530332	0.854362	0	0.186744	4.62661	4.05077	0.755781	1.05291	6.69257	6.04981
Solyc07g043130.2.1		Y	Y	Y			Y				55.6781	55.7664	16.1045	14.5187	22.6982	26.2224	36.3375	43.0632	25.6177	21.1959	14.3598	18.8208	23.1094	25.0296
Solyc07g043310.2.1			Y			Y					14.1315	15.1342	21.6197	21.8795	15.5918	19.1903	14.0359	14.6034	31.1011	28.5438	12.2814	13.8524	29.8591	32.8291
Solyc07g043320.2.1				Y			Y		Y	Y	75.9333	77.5583	20.0755	21.6477	63.4277	62.4342	72.6749	77.0133	17.7353	16.1717	59.1398	75.5795	39.5262	51.1269
Solyc07g043500.1.1				Y		Y	Y	Y	Y		21.4799	24.6745	59.2337	58.3357	16.1221	15.8386	18.8705	17.1058	62.7163	56.1455	46.1026	50.1122	35.5221	39.3831
Solyc07g043550.2.1							Y				4.61629	5.5938	3.30914	2.89795	6.89432	4.86329	7.17392	7.32037	3.25576	3.76816	10.5809	9.47623	4.46171	3.05456
Solyc07g043590.2.1							Y				103.348	110.709	67.5065	51.1198	110.945	107.978	118.214	130.123	68.0283	57.433	61.5961	51.6915	110.056	88.434
Solyc07g044860.2.1			Y								302.226	295.373	142.073	166.574	163.979	176.787	236.427	234.7	135.543	143.064	142.748	173.994	141.288	148.131
Solyc07g044990.2.1						Y	Y				2.63788	2.84838	2.53701	1.24612	2.43953	3.35173	4.21078	3.77223	1.37085	1.19325	1.41709	1.74389	2.23086	1.7497
Solyc07g045140.2.1			Y			Y					5.27576	7.06947	4.19158	3.85427	5.19725	2.95741	5.14651	9.33721	4.2839	2.63771	6.80203	7.46911	2.23086	3.38078
Solyc07g045450.1.1				Y			Y		Y	Y	7.63101	5.79971	1.10305	1.62285	3.07593	3.48317	6.70606	5.19149	1.62788	1.78987	2.92865	3.91553	3.26048	3.44009
Solyc07g045460.2.1				Y			Y		Y	Y	18.4652	19.6984	3.75036	3.44856	15.1675	13.0126	19.1824	18.9732	15.6791	12.0895	16.9106	17.6034	23.7958	18.9798
Solyc07g047680.1.1			Y	Y		Y	Y	Y	Y		7.5368	7.06947	1.54427	1.47795	5.83365	5.45478	7.9537	4.7433	2.3133	1.38166	5.66835	4.34327	2.40246	2.19454
Solyc07g047840.2.1		Y	Y								5.6526	5.93698	2.86792	3.76733	2.33346	2.43165	2.49528	3.47344	2.3133	2.00968	2.36181	2.99423	2.45966	2.10557
Solyc07g047850.2.1			Y	Y		Y	Y				509.488	420.565	172.075	191.293	282.455	250.328	441.664	335.131	134.343	159.142	229.663	311.531	168.573	205.812
Solyc07g047960.2.1				Y			Y				2.44946	2.84838	6.61829	7.44772	3.81839	3.68033	2.02741	3.80958	8.05373	7.0967	6.80203	5.62651	4.29011	4.68564
Solyc07g048110.2.1							Y				20.9146	22.8213	12.1335	11.7946	21.1072	20.7676	27.1361	24.4635	15.5077	14.6016	25.5076	23.8222	15.33	19.1281
Solyc07g049180.2.1			Y								10.2689	8.16764	5.40493	5.04243	5.30332	5.06045	6.08224	10.1215	3.94119	3.23434	7.27439	8.19299	4.63332	4.44839
Solyc07g049290.2.1		Y	Y	Y	Y	Y	Y				61.0481	60.7082	21.2888	27.8783	23.8649	24.9737	52.2449	50.3462	25.275	30.3651	38.3559	53.5012	18.3617	22.7461
Solyc07g049360.2.1							Y				110.132	112.768	61.5501	51.1777	102.46	96.4772	120.865	114.437	63.9157	58.9717	99.3852	89.9584	86.603	75.2371
Solyc07g049440.2.1									Y	Y	1.50736	1.23544	2.3164	1.79673	0.954598	0.920083	1.7155	1.15781	0.942457	1.69567	1.51156	1.77679	0.686417	0.682087
Solyc07g049560.2.1			Y			Y				Y	2.92051	3.80928	4.41219	3.62243	7.10645	5.71766	3.58696	3.99633	12.8517	15.6379	5.10152	4.6065	8.69462	8.30367
Solyc07g049660.2.1						Y	Y				3.48577	3.32883	2.53701	2.02856	2.65166	2.69453	6.5501	4.07102	0.856779	2.00968	2.0784	3.09294	1.88765	2.66904
Solyc07g049690.2.1			Y	Y			Y		Y	Y	1.03631	1.02953	5.18432	6.3465	1.37886	1.51156	1.24764	1.606	5.22635	3.64255	3.87338	3.06003	2.91727	2.04626
Solyc07g051860.1.1				Y			Y		Y	Y	2.35525	0.960899	0.22061	0.202856	0.424266	1.70872	1.87146	1.08312	1.19949	0.376816	1.13367	0.756782	0.686417	0.919334
Solyc07g051930.1.1			Y								2.26104	1.81884	2.2061	2.69509	4.77299	2.89169	2.33932	2.20358	5.14068	4.23918	0.755781	1.8097	4.23291	4.15183
Solyc07g052100.2.1				Y			Y		Y	Y	24.5888	34.6953	74.3454	76.216	28.6379	34.0431	30.4112	33.2405	41.2111	43.1454	45.9137	38.7275	33.234	31.8208
Solyc07g052180.1.1				Y		Y			Y	Y	0.75368	1.26976	6.28737	6.92609	1.48493	0.788642	4.05482	0.224093	1.88491	5.33822	1.98392	8.45622	0.171604	0.504151
Solyc07g052230.2.1			Y			Y		Y		Y	6.50049	7.54992	4.85341	4.40488	4.66692	4.20609	7.32988	5.75172	0	0.690829	4.91257	4.93554	1.71604	1.7497
Solyc07g052240.2.1			Y								129.068	125.054	73.0218	77.0274	89.2018	95.6229	106.673	99.4599	50.6357	57.0248	100.424	94.8281	58.2883	55.2194
Solyc07g052480.2.1		Y	Y		Y	Y			Y	Y	14.6968	14.1389	14.119	22.9517	3.60626	3.61461	9.98111	9.74805	2.39898	3.48555	3.02312	5.5278	2.40246	1.98695
Solyc07g052510.2.1		Y	Y	Y	Y	Y	Y	Y	Y		0.75368	0.617721	14.6705	14.9534	1.591	2.03733	0.31191	0.224093	18.6778	16.1717	2.92865	3.02713	14.8152	14.1755
Solyc07g052610.2.1		Y	Y	Y		Y	Y				1.97841	1.71589	0.551524	0.405713	0.742465	0.394321	2.02741	1.30721	0.856779	0.125605	0.37789	0.0987107	0.572014	0.355871
Solyc07g052690.2.1				Y			Y		Y	Y	1.03631	1.68157	2.64731	3.18774	1.80313	1.11724	1.24764	1.12047	3.59847	2.4807	1.32262	1.67808	1.48724	1.21589
Solyc07g052870.1.1							Y				2.16683	2.05907	2.64731	1.53591	0.954598	1.77444	0.935729	0.859023	1.62788	1.28745	0.755781	1.02001	2.28806	1.24555
Solyc07g053090.2.1									Y		1.13052	0.857945	1.65457	1.94162	0.636398	1.05152	1.40359	1.5313	0.685424	1.00484	1.0392	1.28324	1.20123	1.09727
Solyc07g053120.2.1							Y		Y	Y	1.22473	1.40703	3.19884	2.05754	0.954598	1.3144	0.935729	1.19516	1.79924	1.06764	1.32262	1.31614	1.08683	1.30486
Solyc07g053140.2.1									Y		58.5987	57.8598	43.0189	35.268	99.9146	71.7007	75.6381	77.3121	39.9259	36.8023	52.4323	49.9805	63.0932	55.1601
Solyc07g053220.1.1			Y	Y			Y		Y	Y	13.0952	14.6194	62.1016	66.1022	21.4254	26.9453	15.7514	19.3093	39.0691	29.5172	23.7126	27.639	26.5415	29.478
Solyc07g053290.2.1								Y			8.76154	10.6385	10.3686	9.21547	3.28806	9.92375	8.73347	8.06735	16.2788	13.0001	8.69148	8.94977	15.1584	15.5694
Solyc07g053320.2.1				Y			Y		Y	Y	2.63788	3.60337	0.661829	0.956323	4.66692	3.68033	4.52269	4.44451	3.85551	2.54351	4.91257	5.10006	4.1757	4.62633
Solyc07g053430.2.1							Y		Y		156.389	133.153	90.7808	55.6696	206.936	174.356	179.66	159.741	82.4222	69.3969	145.204	110.227	106.051	101.69
Solyc07g053450.2.1		Y	Y	Y		Y	Y		Y		6.12365	6.58902	0.772133	0.840405	2.43953	3.22029	2.96314	3.43609	0.514068	0.628026	2.7397	2.59938	1.25843	1.89798
Solyc07g053550.1.1				Y						Y	2.16683	3.19156	0.882438	1.18816	1.9092	1.18296	1.55955	2.20358	4.11254	3.29714	1.13367	1.25034	2.68847	2.0166
Solyc07g053600.2.1				Y			Y				43.9019	47.187	22.6125	19.9669	39.1385	40.9437	48.0341	46.2752	19.4489	23.6452	36.183	41.2611	31.7468	38.3155
Solyc07g053630.2.1		Y	Y	Y							3.39156	4.6329	1.76488	1.07224	0.530332	1.97161	3.1191	1.64335	1.02814	2.04109	1.0392	1.67808	1.14403	1.18624
Solyc07g053720.2.1				Y							23.6467	25.6354	13.6778	11.7077	17.1828	17.4816	20.742	22.6334	14.9936	16.6427	19.7448	19.3144	16.9888	18.8315
Solyc07g054020.1.1		Y					Y		Y		1.78999	1.33839	1.54427	1.04326	4.13659	3.02313	4.21078	2.01684	2.3133	1.19325	1.51156	1.77679	1.88765	1.95729
Solyc07g054170.2.1				Y			Y		Y	Y	38.2493	32.396	8.60377	7.07099	26.6227	24.6451	35.8696	37.4235	13.9655	12.2465	23.4292	22.4402	20.7641	19.1577
Solyc07g054180.2.1				Y			Y		Y		2.44946	2.60815	0.882438	1.15918	3.07593	2.03733	3.1191	2.39033	1.5422	1.47586	1.60603	1.48066	1.48724	2.37248
Solyc07g054280.1.1				Y			Y		Y	Y	0	0.583403	6.9492	6.95507	1.06066	0.722922	0.935729	0.560233	4.19822	1.38166	5.10152	7.43621	0.286007	1.09727
Solyc07g054290.1.1			Y	Y							23.7409	19.0807	9.1553	10.7804	10.5006	13.9984	20.4301	14.0058	10.367	8.41555	9.35279	10.562	10.0102	10.7651
Solyc07g054370.2.1							Y				5.6526	7.30969	3.97097	4.17304	7.63678	7.8207	8.73347	8.17939	4.62661	3.89376	8.12464	8.12718	6.86417	7.88848
Solyc07g054410.1.1										Y	1.50736	1.57862	0.992743	1.01428	1.16673	2.23449	2.65123	1.4566	1.62788	1.22465	2.0784	2.36906	2.00205	2.63938
Solyc07g054430.2.1		Y	Y	Y		Y	Y	Y	Y		12.0589	13.3496	127.071	147.332	27.4712	25.2365	24.4849	19.8696	136.485	151.543	36.183	41.5243	84.3721	75.3261
Solyc07g054470.1.1			Y	Y							2.26104	2.09339	1.32366	0.840405	1.69706	1.24868	1.87146	1.34456	1.11381	1.38166	1.41709	1.34905	1.37283	0.652431
Solyc07g054610.2.1			Y	Y		Y		Y		Y	0.28263	0.343178	0.661829	1.2751	0.636398	0.788642	1.09168	0.784326	1.37085	1.63287	0.37789	0.756782	1.48724	3.17319
Solyc07g054730.1.1						Y				Y	35.5172	29.582	39.0479	37.4994	37.2293	31.1514	68.932	42.3162	53.463	62.4886	23.1458	34.2526	18.8765	17.2598
Solyc07g054760.1.1			Y	Y	Y	Y	Y	Y	Y	Y	2.07262	1.61294	24.3774	24.1689	2.65166	3.81177	2.33932	1.30721	11.6522	8.44695	4.72363	4.90263	10.1819	10.6168
Solyc07g054770.1.1			Y	Y		Y	Y	Y	Y	Y	0.47105	0.0686356	9.81712	9.07057	0.424266	0.460041	0	0.149395	4.02686	2.95172	1.13367	0.9213	2.63127	2.2242
Solyc07g054780.1.1		Y	Y	Y	Y	Y	Y	Y	Y	Y	1.78999	1.26976	38.8273	44.5125	5.19725	5.12617	2.65123	0.821674	23.9041	24.7756	10.6754	11.7137	14.9296	15.3618
Solyc07g054790.1.1		Y	Y	Y		Y	Y	Y	Y	Y	0	0	6.72859	8.40405	0	0.328601	0.31191	0.0373488	3.08441	2.57491	0.472363	0.789686	2.51686	2.758
Solyc07g055210.2.1				Y			Y		Y	Y	29.2051	32.0528	120.012	113.6	25.6681	28.654	25.2647	24.5755	94.2457	101.363	23.2403	22.4073	51.8817	43.446
Solyc07g055270.1.1			Y	Y		Y	Y	Y	Y		1.41315	0.926581	7.28011	8.11425	0.954598	2.10305	1.7155	1.00842	3.34144	3.42274	3.1176	3.6852	4.40451	4.06287
Solyc07g055280.2.1				Y							3.39156	3.12292	10.9202	7.9114	6.15185	4.86329	6.70606	4.03367	6.51152	7.00249	6.61308	6.21878	6.63537	4.30011
Solyc07g055330.2.1									Y		1.31894	1.44135	0.661829	1.24612	1.591	2.95741	1.55955	1.71805	1.37085	0.910638	2.36181	0.888397	1.71604	1.7497
Solyc07g055780.2.1				Y					Y	Y	1.50736	1.47567	3.52975	4.05713	2.01526	1.84017	2.65123	1.97949	2.22763	2.16669	2.45629	2.82971	1.54444	1.7497
Solyc07g055840.2.1				Y							7.25417	6.58902	2.64731	2.75305	4.34872	4.00893	6.08224	5.11679	3.34144	3.23434	3.58996	3.06003	4.0613	3.52906
Solyc07g055870.2.1				Y			Y		Y	Y	9.13838	10.4669	3.19884	5.01345	8.59138	10.1866	7.79774	10.9432	7.11127	5.99765	8.69148	7.50202	8.40861	10.2313
Solyc07g056160.2.1		Y					Y		Y		37.1188	35.7592	39.5994	53.9598	17.501	18.5988	20.2741	22.6334	40.44	50.8387	34.388	49.4212	30.5456	32.3546
Solyc07g056170.2.1			Y	Y		Y	Y	Y	Y		6.68891	6.45175	0.22061	1.01428	2.96986	3.87749	4.67864	6.53605	0.599746	1.28745	2.64523	4.11295	1.31563	1.27521
Solyc07g056310.2.1			Y			Y		Y		Y	3.39156	4.77018	5.29463	4.17304	5.62152	5.78338	3.43101	3.39874	21.3338	13.9108	5.00705	4.86973	14.9296	13.1672
Solyc07g056320.2.1				Y			Y		Y	Y	11.1168	11.0503	0.661829	1.50693	7.21252	8.87222	7.48583	8.66493	1.45653	1.35026	6.32966	8.58783	4.91932	6.70224
Solyc07g056360.1.1			Y			Y		Y		Y	1.78999	1.95612	2.75762	3.1008	2.96986	2.03733	1.87146	1.90479	8.05373	5.40103	3.68443	3.91553	6.34936	7.14708
Solyc07g056410.2.1				Y		Y	Y		Y	Y	1.69578	2.29929	0.110305	0.144897	2.12133	1.70872	3.43101	2.98791	1.19949	0.47102	0.850253	2.23744	0.858021	1.77936
Solyc07g056440.2.1				Y			Y		Y	Y	1.50736	0.995217	0.441219	0.289795	0.954598	1.18296	1.87146	1.6807	0.42839	0.25121	2.36181	1.08582	0.80082	1.66073
Solyc07g056480.2.1			Y	Y		Y	Y	Y	Y		6.12365	10.9474	38.3861	35.355	9.01564	11.4353	9.82515	7.54446	44.6382	38.4666	22.7679	17.7021	31.518	23.6951
Solyc07g056540.2.1			Y	Y		Y	Y	Y	Y		30.053	29.1015	5.51524	6.6363	14.7432	15.8386	25.2647	19.7575	4.54093	4.96141	9.6362	11.3517	5.54854	5.16014
Solyc07g056640.1.1				Y	Y		Y	Y	Y	Y	3.29735	4.83881	15.8839	17.4167	3.92446	1.90589	8.2656	5.90112	13.3658	10.0484	8.50253	7.89686	5.31973	7.85883
Solyc07g061720.2.1			Y	Y		Y	Y	Y	Y	Y	0.28263	0.205907	10.5893	10.4616	0.106066	0.13144	0.155955	0.261442	0.856779	1.00484	1.13367	1.05291	1.14403	0.563463
Solyc07g061730.2.1				Y			Y		Y	Y	1.60157	1.40703	6.28737	8.57792	1.80313	1.44584	2.18337	2.09153	1.11381	1.53866	7.9357	7.89686	2.80287	2.87663
Solyc07g061740.2.1			Y	Y					Y		0.37684	0.754992	1.87518	2.2604	0.424266	0.920083	1.40359	0.859023	0.42839	0.376816	1.88945	2.99423	2.05925	1.12693
Solyc07g061750.2.1		Y	Y	Y	Y	Y	Y		Y		1.13052	1.06385	12.9057	16.924	5.30332	4.79757	0.935729	0.859023	9.76729	12.0895	12.9427	15.6292	10.4107	7.65123
Solyc07g061760.1.1			Y	Y		Y	Y		Y	Y	1.60157	1.26976	7.50072	7.82446	1.80313	1.97161	1.09168	1.38191	5.48339	4.8986	6.42414	6.25168	4.97652	2.40213
Solyc07g061770.2.1				Y			Y		Y	Y	0.56526	0.480449	3.08853	2.37632	0.636398	1.24868	0.31191	0.821674	2.39898	1.66427	2.7397	2.50067	1.14403	0.889678
Solyc07g062040.2.1				Y			Y		Y	Y	3.48577	3.32883	0.882438	1.18816	1.80313	4.00893	1.87146	3.1373	1.11381	1.47586	3.02312	4.83683	2.86007	3.70699
Solyc07g062100.2.1		Y							Y		10.2689	10.9131	14.0087	11.6208	4.45479	5.8491	7.32988	6.90953	11.1381	12.4035	11.1478	10.3317	8.1226	8.86713
Solyc07g062140.2.1				Y			Y		Y	Y	74.4259	63.4193	24.8186	22.633	73.0798	84.319	71.5833	72.7555	48.2367	49.7083	182.427	155.075	72.1882	86.3581
Solyc07g062260.2.1			Y								26.473	26.1159	39.9303	42.339	57.3819	46.4642	34.3101	34.2115	49.1791	55.4547	36.4664	42.4456	61.8347	59.045
Solyc07g062400.2.1									Y		7.15996	5.52517	4.85341	3.82529	12.1976	7.1635	9.82515	7.02158	5.48339	4.64739	6.32966	7.30459	6.12055	5.87188
Solyc07g062490.1.1							Y		Y	Y	7.44259	6.3488	10.479	13.8522	5.62152	5.38905	7.48583	5.26619	7.71102	12.7175	8.03017	9.213	6.12055	5.16014
Solyc07g062500.2.1		Y	Y						Y	Y	3.67419	1.95612	2.4267	1.91265	1.06066	0.920083	1.55955	1.26986	2.57034	2.4807	0.850253	1.54647	0.572014	0.800711
Solyc07g062530.2.1				Y			Y		Y		1.8842	2.77974	4.6328	5.18733	2.22739	2.43165	1.87146	2.20358	4.11254	5.30682	2.36181	3.32326	2.57406	4.68564
Solyc07g062810.2.1				Y			Y		Y	Y	11.0226	10.0894	62.984	66.6238	7.53071	8.08358	8.2656	6.64809	12.5947	13.4398	8.88042	8.35751	13.7855	12.1589
Solyc07g062820.1.1				Y			Y		Y	Y	8.66733	7.20674	31.5472	33.3554	7.10645	8.67506	5.14651	7.43242	11.4808	9.76581	8.03017	8.55493	12.8131	12.2183
Solyc07g063070.1.1		Y						Y	Y		3.29735	4.35836	3.64006	4.17304	1.80313	1.90589	2.49528	2.05419	4.45525	5.21262	2.55076	5.13296	3.43209	4.80426
Solyc07g063180.2.1		Y	Y		Y	Y	Y				4.33366	3.63769	7.28011	7.88242	7.42465	8.28074	4.67864	3.47344	10.1957	11.3045	4.06232	4.96844	11.6691	9.60853
Solyc07g063320.2.1						Y				Y	0.942101	0.926581	0.661829	0.898364	1.2728	1.84017	0.467864	0.746977	1.02814	0.47102	1.0392	1.90841	1.54444	2.07592
Solyc07g063390.2.1						Y	Y	Y	Y		2.92051	4.46132	8.38316	7.15793	3.39412	3.22029	3.58696	2.95056	9.16754	6.40587	4.15679	3.98133	7.15018	6.90984
Solyc07g063600.2.1		Y	Y	Y	Y	Y	Y	Y			26.0962	21.277	3.97097	3.01386	6.04579	7.09778	21.6777	10.6444	3.42712	4.8358	10.6754	20.5647	2.63127	2.63938
Solyc07g063640.1.1		Y	Y	Y	Y	Y	Y	Y	Y	Y	0.28263	0.274542	29.4514	23.7921	2.12133	2.16877	1.40359	0.224093	11.7379	12.6547	1.60603	2.04002	8.0654	9.90509
Solyc07g063820.2.1										Y	16.4868	15.443	13.016	16.6922	19.092	24.3822	18.2467	19.0479	35.2136	35.2637	20.8784	25.6977	28.8295	32.236
Solyc07g063850.2.1		Y									221.77	208.069	185.533	204.566	96.5204	104.364	157.826	158.621	180.952	189.161	159.659	192.914	108.912	127.105
Solyc07g063940.1.1				Y			Y		Y	Y	11.4936	11.7367	35.8491	36.5721	17.2888	12.1582	13.4121	12.6613	20.1343	24.0534	17.6664	17.8666	14.0716	15.3321
Solyc07g064160.2.1		Y	Y			Y		Y		Y	101.653	95.3349	68.4993	74.4772	48.8966	46.5956	73.9226	88.0686	14.0512	19.8456	47.1418	72.1905	19.0481	19.7509
Solyc07g064180.2.1			Y	Y		Y	Y	Y	Y		0.942101	0.686356	4.30189	3.97019	1.591	0.722922	0.779774	0.933721	6.25449	4.8672	1.60603	3.48778	5.49134	5.18979
Solyc07g064410.1.1			Y	Y		Y	Y		Y	Y	2.44946	2.05907	0.110305	0.202856	1.48493	0.985803	2.96314	2.76381	0.599746	0.157007	0.472363	0.0329036	1.02963	0.296559
Solyc07g064790.2.1			Y	Y		Y	Y	Y	Y		17.7115	18.1198	4.5225	1.79673	9.86418	10.3838	11.6966	10.0095	6.51152	3.98797	8.40806	4.14585	4.63332	3.70699
Solyc07g064900.2.1			Y	Y			Y		Y		19.8783	21.8948	7.83164	7.21589	13.8947	16.0357	16.8431	19.4214	6.85424	5.49523	11.9035	11.944	10.2963	10.4389
Solyc07g064990.2.1			Y	Y		Y	Y		Y	Y	4.23945	3.05429	0.22061	0.289795	0.848531	2.36593	4.67864	2.05419	3.25576	2.10389	3.30654	2.63229	1.14403	0.94899
Solyc07g065060.1.1				Y			Y		Y		9.60943	9.98648	3.64006	4.25998	9.75811	7.88642	10.1371	9.97214	3.59847	2.88892	9.25831	8.09428	6.00615	7.23605
Solyc07g065120.2.1									Y		135.38	126.152	65.9623	66.6818	130.992	136.764	125.856	114.848	85.2496	94.7692	107.982	117.63	105.765	116.904
Solyc07g065320.2.1				Y							2.8263	3.26019	2.2061	0.927343	2.75773	1.643	1.87146	2.35298	2.57034	1.94688	1.88945	2.00712	2.80287	2.37248
Solyc07g065540.1.1			Y			Y				Y	9.70364	7.48128	12.3541	7.53466	13.2583	12.7497	10.9168	6.23726	18.9348	17.8045	14.5488	11.5163	23.2238	24.1103
Solyc07g065880.2.1				Y			Y		Y	Y	6.40628	6.62334	0.992743	1.73877	4.87905	5.25761	7.64179	6.46135	1.79924	1.94688	4.44021	5.03425	4.1757	3.82562
Solyc07g065920.2.1				Y			Y				30.3356	26.8708	14.3396	13.1277	25.6681	20.5047	31.191	25.2478	19.8773	18.7152	33.6322	32.3442	23.1094	28.7366
Solyc07g065970.1.1			Y	Y	Y	Y	Y	Y	Y	Y	2.73209	3.50042	66.6241	55.9883	7.42465	5.25761	3.1191	2.20358	23.6471	29.2974	9.6362	10.4962	23.2238	21.4709
Solyc07g066010.2.1		Y	Y	Y		Y	Y				4.52208	5.5938	0.330914	1.18816	1.591	1.77444	4.36673	2.39033	1.28517	0.910638	3.30654	3.45488	1.02963	0.94899
Solyc07g066150.1.1		Y	Y	Y							37.7782	45.025	12.0232	15.3012	16.4403	19.9789	28.0719	27.302	10.0243	12.5291	19.9337	29.0539	15.6732	16.3701
Solyc07g066180.2.1				Y							14.4141	16.5755	5.73585	8.49098	9.86418	11.8296	14.6598	13.1468	3.94119	6.28026	16.8161	17.5047	7.55059	10.0237
Solyc07g066230.2.1			Y	Y		Y	Y	Y	Y		2.44946	2.19634	12.0232	11.7367	1.37886	2.82597	1.24764	1.7554	11.8236	9.6402	3.30654	2.36906	6.57816	5.48635
Solyc07g066250.1.1							Y			Y	17.052	14.1733	7.50072	10.0269	17.3949	18.5331	19.0265	18.9359	8.39644	8.76097	17.194	18.9196	18.1329	22.5089
Solyc08g005240.1.1			Y			Y					38.6261	41.8677	63.3149	72.4197	44.9722	57.8995	39.6125	41.2705	51.2354	56.5224	42.3237	42.8405	83.1709	98.6357
Solyc08g005250.2.1			Y								22.422	21.5516	31.1059	31.7035	32.0321	33.0573	30.0993	24.6876	30.073	23.8964	23.2403	22.4731	53.9981	48.2502
Solyc08g005260.1.1									Y	Y	1.97841	2.05907	1.21335	1.47795	3.28806	2.69453	3.43101	1.7554	3.68415	2.07249	3.30654	2.59938	2.51686	4.12218
Solyc08g005350.2.1							Y				12.7184	15.7862	8.27286	8.6069	12.3037	16.7586	16.3753	18.6744	8.73915	8.03874	9.44726	11.0556	14.4148	17.8232
Solyc08g005420.2.1							Y				17.5231	20.1446	15.2221	10.8673	24.2892	23.3964	25.7325	27.9743	18.7635	14.9784	21.2563	20.9596	23.7386	19.395
Solyc08g005460.2.1			Y							Y	6.31207	7.96173	6.39768	6.57834	9.01564	10.9753	10.7609	7.73121	13.7085	12.0895	7.84122	9.47623	13.7855	17.9715
Solyc08g005560.2.1				Y							5.46418	7.20674	13.016	14.6926	6.89432	9.13511	6.86201	9.11312	7.79669	7.56772	7.55781	9.57494	8.98062	7.29536
Solyc08g005610.2.1							Y		Y	Y	0.75368	1.64725	1.54427	2.37632	0.530332	0.854362	0.779774	0.63493	1.62788	1.22465	1.22814	2.00712	1.14403	0.860023
Solyc08g005630.2.1			Y				Y		Y	Y	1.60157	2.8827	3.86067	4.11508	1.06066	1.24868	0.779774	1.6807	3.08441	3.10873	2.92865	4.47489	0.629216	1.09727
Solyc08g005650.2.1	Y	Y	Y	Y			Y		Y	Y	4.14524	2.64247	0.441219	0.0579589	0.318199	1.05152	0.779774	1.12047	0.257034	0.345414	1.22814	1.18453	0.286007	0.800711
Solyc08g005680.2.1				Y			Y		Y	Y	0.65947	0.995217	4.85341	3.44856	1.16673	0.262881	1.24764	0.224093	3.25576	0.596625	3.30654	1.54647	0.228806	1.09727
Solyc08g005800.2.1			Y								97.319	84.01	61.6604	63.8708	47.1995	50.2759	69.3999	60.7666	33.243	41.2927	56.3057	65.6755	41.2422	45.255
Solyc08g005880.2.1			Y			Y		Y		Y	1.78999	2.77974	2.09579	2.17346	0.848531	2.23449	2.33932	1.41926	5.14068	4.30198	0.944726	0.625168	5.14813	4.47805
Solyc08g005930.1.1				Y			Y		Y		1.78999	2.71111	1.10305	0.579589	2.01526	1.77444	2.96314	2.20358	1.02814	0.565224	0.755781	0.592264	1.54444	1.12693
Solyc08g006200.1.1		Y	Y	Y	Y	Y					3.57998	3.87791	9.37591	9.09955	8.59138	13.6698	4.36673	5.90112	14.908	15.0726	8.50253	9.96978	18.8193	17.1115
Solyc08g006460.2.1				Y			Y				16.0157	18.6346	9.37591	7.67956	13.2583	14.4584	17.4669	18.2636	12.9374	10.1426	13.5096	14.4118	14.0143	12.2479
Solyc08g006730.1.1		Y	Y	Y	Y	Y	Y	Y	Y	Y	0.0942101	0.102953	2.64731	3.27468	1.16673	1.24868	0	0.0746977	3.76983	4.01937	0.755781	0.690975	7.77939	9.90509
Solyc08g006860.2.1		Y	Y	Y	Y	Y	Y	Y	Y		0	0	31.1059	23.2705	0.212133	1.05152	0	0	50.8927	46.3169	0.0944726	0	20.4781	20.0474
Solyc08g006930.2.1			Y	Y							81.3033	59.3012	35.2975	32.2542	55.3667	47.1871	72.363	59.0112	30.7584	29.2974	46.386	55.6071	33.0052	32.4733
Solyc08g007060.2.1				Y						Y	5.6526	4.56427	1.65457	2.2604	3.39412	4.66613	4.52269	3.51079	3.59847	2.4807	3.02312	3.55359	4.80492	3.76631
Solyc08g007080.2.1		Y	Y			Y				Y	0.47105	0.926581	0.772133	1.53591	2.43953	2.49737	1.09168	1.23251	2.3133	2.92032	0.566835	0.82259	3.14608	2.4911
Solyc08g007120.2.1				Y			Y		Y		4.05103	4.46132	1.54427	1.56489	4.03052	3.74605	4.67864	3.69753	1.19949	1.66427	1.98392	2.56648	3.08888	2.13523
Solyc08g007130.2.1		Y							Y		2.73209	2.26498	2.2061	3.18774	1.06066	1.05152	2.33932	2.09153	2.14195	2.04109	1.79498	2.96132	1.60164	2.58007
Solyc08g007210.2.1										Y	1.97841	3.22587	1.10305	2.1155	1.69706	2.76025	3.1191	2.27828	1.37085	1.09905	1.98392	2.96132	4.1185	3.41043
Solyc08g007240.2.1			Y	Y		Y	Y	Y	Y		1.50736	1.78453	9.04499	12.722	0.636398	1.38012	1.55955	1.97949	12.1663	16.3915	3.21207	7.00846	9.72424	8.86713
Solyc08g007690.1.1						Y				Y	15.6389	12.9721	12.2438	10.6065	15.8039	18.5331	15.9074	10.9059	16.1075	14.79	13.2262	16.1228	26.4843	27.5504
Solyc08g007770.2.1			Y	Y			Y				26.7557	27.4542	9.70682	9.50527	12.4098	15.7071	22.6134	19.8696	9.25322	8.32135	8.31359	9.1801	13.0991	10.9727
Solyc08g007820.1.1							Y				5.46418	5.9713	4.30189	3.04284	5.72759	5.38905	7.64179	6.79749	4.19822	3.35994	6.42414	4.50779	4.97652	4.09252
Solyc08g008310.2.1		Y	Y			Y			Y	Y	9.51522	12.9378	10.0377	10.2877	22.1679	24.0536	12.3204	13.1094	21.5908	21.8553	13.0372	13.2272	38.6682	33.6595
Solyc08g008360.2.1			Y	Y		Y	Y	Y			3.10893	2.5052	9.04499	8.63588	4.03052	4.73185	3.1191	2.80116	11.5665	10.8335	7.55781	6.81104	10.5823	10.1127
Solyc08g008430.2.1				Y			Y		Y		1.41315	1.75021	0.992743	0.492651	1.37886	1.51156	1.24764	1.34456	1.02814	0.659428	0.850253	0.756782	1.08683	0.830367
Solyc08g008480.2.1				Y			Y		Y	Y	8.66733	8.33923	0.661829	1.10122	6.36398	7.09778	9.98111	7.05893	3.42712	2.26089	5.29046	4.54069	6.74977	7.32502
Solyc08g013670.2.1			Y	Y		Y	Y				109.284	107.998	31.8781	33.0076	59.1851	64.4058	94.0407	92.8866	22.1906	23.08	61.8795	66.7614	39.8694	36.7141
Solyc08g013730.2.1						Y	Y				39.8509	33.4255	26.3628	19.3003	38.6082	32.9915	55.9878	41.4572	26.1318	25.2781	25.791	20.4331	21.5077	21.5599
Solyc08g013980.2.1		Y	Y	Y	Y	Y					2.8263	3.50042	1.65457	1.44897	0.954598	1.70872	3.43101	2.72646	1.62788	1.78987	1.13367	1.97421	1.31563	1.39383
Solyc08g014000.2.1	Y	Y	Y	Y	Y	Y	Y	Y	Y		1.22473	1.16681	117.585	105.485	4.34872	9.66087	0.467864	0.373488	200.915	164.166	1.13367	1.64518	87.0606	68.1197
Solyc08g014050.1.1				Y			Y		Y	Y	3.20314	2.64247	22.6125	22.2273	3.07593	3.35173	4.67864	2.83851	1.79924	1.78987	3.02312	4.11295	2.74567	3.02491
Solyc08g014130.2.1				Y			Y		Y	Y	66.6065	71.587	5.95646	7.07099	66.5036	72.4236	58.795	69.5809	7.45398	5.93485	70.571	81.6338	35.5221	39.5017
Solyc08g014280.2.1				Y			Y		Y	Y	6.5947	7.30969	2.3164	2.08652	6.57612	6.63774	6.39415	6.68544	1.71356	1.44446	5.10152	5.42909	5.60574	5.78291
Solyc08g014350.1.1		Y									0.942101	0.995217	1.76488	1.56489	2.01526	2.69453	1.7155	1.12047	1.28517	1.78987	0.661308	1.18453	1.31563	1.80901
Solyc08g014580.2.1								Y			2.73209	3.15724	1.98549	2.4053	2.12133	1.97161	2.96314	2.95056	2.99873	2.63771	2.64523	2.66519	3.60369	4.74495
Solyc08g016160.2.1		Y	Y	Y		Y	Y				4.52208	4.46132	17.7591	21.5897	11.3491	14.0641	7.48583	6.72279	22.7903	22.1065	15.3046	15.3002	20.9357	19.306
Solyc08g016190.2.1								Y			3.29735	2.91701	2.3164	2.52121	1.9092	1.77444	3.43101	2.39033	3.17008	1.66427	2.92865	2.59938	3.48929	3.79596
Solyc08g016600.1.1	Y	Y	Y	Y			Y	Y	Y	Y	1.50736	1.9218	15.7736	21.2999	11.137	6.70346	7.79774	5.75172	4.54093	3.10873	18.6111	20.9596	2.97447	4.06287
Solyc08g016610.1.1	Y	Y		Y			Y		Y	Y	2.63788	1.85316	9.48621	17.6775	7.31858	5.8491	6.23819	4.25777	2.65602	1.88408	11.4312	14.3131	2.63127	4.7153
Solyc08g021940.1.1									Y		1.13052	2.36793	2.09579	2.31836	1.06066	0.985803	0.623819	1.79274	1.97059	1.53866	2.17287	2.07293	1.48724	1.36417
Solyc08g022240.1.1		Y	Y	Y		Y					3.95682	4.52995	9.37591	8.54894	8.48531	9.39799	7.32988	5.41558	23.4758	23.08	5.00705	8.48912	14.5864	11.1803
Solyc08g028780.1.1				Y			Y		Y	Y	3.01472	2.8827	0.661829	0.637548	1.9092	2.95741	2.80719	2.53972	0.342712	0.502421	2.92865	3.19165	1.94485	1.42349
Solyc08g029050.2.1				Y		Y	Y		Y	Y	13.472	11.5308	2.2061	2.75305	10.3945	12.4868	14.0359	15.3504	1.28517	1.97828	11.2422	9.47623	6.00615	6.85052
Solyc08g029240.2.1			Y			Y				Y	5.6526	8.95695	12.0232	9.91098	12.9401	12.684	8.2656	8.1047	28.7878	30.7419	12.4704	10.4962	23.2238	26.3641
Solyc08g036570.1.1				Y			Y		Y	Y	14.4141	13.5555	38.4964	42.8606	19.7284	17.0872	17.6229	15.0516	34.6996	31.6211	23.4292	16.2873	16.9888	16.1921
Solyc08g041820.2.1				Y			Y		Y	Y	7.25417	10.2953	3.30914	3.94121	6.78825	8.87222	8.10965	10.0095	5.14068	4.773	7.55781	7.20588	8.1798	8.06642
Solyc08g042000.2.1				Y			Y				18.371	16.8844	6.17707	7.07099	10.0763	13.2755	13.1002	13.8564	6.25449	5.80924	8.88042	11.0556	8.52301	11.2099
Solyc08g042120.1.1							Y				1.97841	1.88748	1.43396	1.21714	2.22739	1.38012	3.89887	2.16623	0.942457	0.910638	3.49549	2.56648	2.17365	1.98695
Solyc08g044510.2.1				Y							14.9794	13.4526	7.28011	6.83915	11.5612	13.867	11.6966	10.0095	2.82737	3.17153	15.4935	19.0183	10.2963	13.5231
Solyc08g048390.1.1				Y			Y				36.0825	46.535	19.5239	20.1118	38.0778	34.0431	37.4292	42.5403	23.9041	19.5944	38.2614	47.6115	24.425	25.4151
Solyc08g060970.2.1							Y		Y	Y	57.845	59.3012	37.0624	34.0219	96.3083	103.181	99.3432	83.624	31.3581	24.807	91.355	93.6765	74.7051	76.0082
Solyc08g061270.1.1				Y			Y		Y	Y	7.5368	7.41265	1.65457	2.08652	5.62152	3.22029	9.82515	4.6686	3.76983	2.92032	3.49549	5.33038	3.77529	4.56702
Solyc08g061910.2.1			Y	Y		Y	Y	Y	Y		0.847891	0.549085	2.53701	2.63713	0.530332	0.262881	0.779774	0.63493	2.82737	2.60631	0.37789	1.15163	1.88765	2.28351
Solyc08g062210.2.1				Y							21.4799	22.4438	47.6517	53.4381	38.0778	36.0147	24.3289	31.2983	44.9809	42.5802	52.4323	57.2522	38.0962	40.4507
Solyc08g062340.2.1				Y			Y		Y	Y	25.7193	28.4838	2.53701	0.231836	23.6528	24.9079	23.7051	32.232	3.25576	0.376816	2.45629	0.263229	24.139	19.6619
Solyc08g062450.1.1				Y			Y		Y	Y	332.373	311.228	48.5341	6.89711	374.839	339.971	423.105	489.27	41.2111	7.2851	27.0192	4.70521	293.443	194.869
Solyc08g063040.2.1			Y	Y		Y	Y	Y	Y		3.20314	3.91223	15.1118	21.155	4.66692	4.99473	5.77033	3.92163	14.3082	11.6185	6.8965	8.09428	8.52301	11.5362
Solyc08g063090.2.1		Y	Y	Y							3.01472	4.11814	8.71408	9.33139	7.63678	7.95214	6.23819	5.26619	9.16754	8.76097	11.1478	13.8524	9.66704	6.61328
Solyc08g065140.1.1				Y			Y			Y	10.1747	6.89788	3.41945	3.07182	6.25792	6.04626	6.5501	7.13363	4.45525	3.70535	6.04625	6.02136	5.94895	7.11743
Solyc08g065210.1.1				Y							11.4936	7.96173	20.627	18.2571	13.0462	11.2382	15.5955	9.636	19.963	19.5002	12.5649	14.2802	10.7539	12.0403
Solyc08g065410.1.1			Y	Y		Y	Y	Y	Y	Y	5.93523	4.01518	0	0.289795	3.81839	5.45478	7.9537	4.7433	0.42839	0.565224	2.64523	2.53358	1.60164	1.92764
Solyc08g065420.2.1				Y			Y			Y	389.182	414.662	169.208	188.714	305.153	349.697	374.447	365.57	236.9	228.884	317.806	355.457	353.333	368.89
Solyc08g065610.2.1							Y				31.2777	30.5085	21.5094	20.6624	28.8501	28.1282	38.2089	47.1342	20.1343	20.2224	14.3598	14.4776	25.4546	22.4496
Solyc08g065810.1.1								Y	Y		2.35525	2.67679	3.08853	3.2457	1.16673	1.84017	2.49528	2.24093	3.25576	3.14013	2.83418	3.6852	2.86007	3.58837
Solyc08g065850.1.1							Y		Y		183.144	156.867	91.6633	83.0841	234.513	168.309	201.026	169.788	100.5	78.5347	125.365	115.59	147.408	138.819
Solyc08g066100.2.1			Y	Y		Y	Y	Y	Y	Y	0.0942101	0.102953	8.05225	6.83915	0.848531	0.0657202	0.155955	0.149395	2.74169	3.26574	0.283418	0.526457	2.28806	3.70699
Solyc08g066310.1.1		Y	Y			Y					3.20314	3.4661	2.09579	1.62285	1.06066	1.51156	2.65123	2.76381	0.856779	1.31886	0.661308	1.18453	0.743619	1.39383
Solyc08g066420.1.1			Y	Y		Y	Y		Y	Y	11.3052	10.5356	2.64731	2.05754	11.3491	9.72659	12.9442	10.3456	2.82737	2.10389	12.187	12.3059	5.09093	5.60497
Solyc08g066500.2.1						Y					7.63101	9.36876	8.16255	7.67956	8.69745	10.7124	6.08224	5.15414	17.1356	17.3649	9.73068	7.07427	14.5864	12.93
Solyc08g066660.1.1		Y	Y	Y		Y	Y	Y	Y	Y	6.21786	3.4661	0.22061	0.289795	2.86379	1.51156	3.27505	3.62284	0.42839	0.47102	0.850253	1.25034	0.629216	1.03796
Solyc08g066790.2.1				Y			Y		Y		1.50736	1.30408	2.86792	3.04284	0.848531	1.38012	1.87146	0.859023	4.62661	3.61115	1.60603	1.8426	1.60164	2.10557
Solyc08g066800.2.1									Y		2.63788	3.29451	3.52975	4.43386	1.69706	1.643	1.87146	2.42767	9.16754	7.37931	2.17287	2.10583	2.86007	2.69869
Solyc08g066840.2.1		Y	Y	Y	Y	Y			Y	Y	6.02944	4.83881	2.97823	1.70979	0.212133	0.854362	3.74292	1.26986	4.88364	3.86236	1.51156	1.94131	0.343209	0.622775
Solyc08g066880.2.1		Y	Y	Y	Y	Y	Y	Y	Y	Y	2.63788	2.26498	158.287	135.247	6.47005	5.32333	3.74292	2.24093	154.477	123.784	20.784	27.7706	59.0319	53.4697
Solyc08g066890.2.1		Y	Y	Y		Y	Y	Y	Y	Y	0	0.171589	11.1408	9.07057	0.530332	0.525761	0.155955	0.186744	8.48212	10.2996	1.88945	1.51356	4.34731	4.30011
Solyc08g067300.1.1		Y	Y	Y		Y	Y				2.35525	2.91701	9.04499	8.69384	5.09119	6.8349	4.52269	3.88428	8.22508	9.13778	3.21207	4.24456	8.86622	8.92644
Solyc08g067320.1.1			Y	Y		Y	Y	Y	Y		8.76154	7.17242	2.2061	1.44897	5.83365	4.79757	10.449	4.818	1.62788	1.13045	5.00705	4.86973	2.45966	2.52076
Solyc08g067330.1.1			Y	Y		Y	Y		Y		8.66733	7.58424	2.75762	2.17346	4.13659	5.45478	13.1002	5.60233	1.97059	2.16669	4.53468	6.61362	3.08888	2.34282
Solyc08g067530.1.1			Y	Y		Y	Y	Y	Y	Y	11.7763	9.95217	0.992743	0.985302	6.47005	6.70346	10.449	7.8806	0.942457	1.41306	3.30654	4.08004	2.57406	2.10557
Solyc08g067960.2.1							Y				55.5839	79.8232	41.0334	40.948	67.14	81.3616	83.4358	104.054	41.4681	34.0704	64.8082	57.2851	73.1606	53.7069
Solyc08g067990.1.1		Y									0.847891	0.686356	0.882438	0.898364	1.2728	2.16877	1.24764	0.784326	0.514068	0.596625	0.472363	0.954204	1.37283	1.21589
Solyc08g068170.1.1				Y			Y		Y	Y	2.73209	2.09339	0.551524	0.55061	2.75773	2.23449	2.80719	3.51079	1.11381	1.63287	3.96785	6.51491	2.28806	2.90628
Solyc08g068230.2.1			Y	Y		Y	Y		Y		17.9941	16.7471	5.29463	5.18733	11.243	9.98947	14.6598	17.6287	5.74042	4.39618	13.793	13.6879	5.83455	9.04506
Solyc08g068250.2.1				Y							4.61629	4.83881	2.4267	2.02856	3.50019	3.74605	3.27505	3.51079	2.91305	3.32854	4.15679	4.47489	3.31768	3.35112
Solyc08g068350.2.1				Y			Y		Y		19.2189	21.2427	7.05951	8.57792	14.6372	18.2702	22.4575	21.6997	7.3683	6.24886	22.1066	18.5247	14.7008	15.9846
Solyc08g068490.2.1		Y	Y	Y			Y		Y		6.40628	6.21152	1.10305	1.15918	1.48493	3.08885	4.21078	3.73488	1.37085	0.690829	1.79498	4.44198	1.71604	2.31316
Solyc08g068930.2.1		Y									3.10893	2.91701	1.21335	1.65183	0.742465	1.84017	2.18337	2.09153	2.48466	2.26089	2.64523	2.04002	2.28806	1.86832
Solyc08g074390.2.1			Y	Y		Y	Y	Y	Y		2.73209	1.61294	17.0972	16.4314	2.22739	2.16877	2.18337	1.56865	24.5039	23.0486	3.30654	5.39619	19.6773	18.5646
Solyc08g074480.1.1									Y		33.4446	26.3561	48.0929	46.2802	20.6829	23.3964	25.5766	24.0526	39.1548	40.3821	28.3418	33.5946	35.2361	28.4697
Solyc08g074510.1.1				Y							2.63788	2.57384	0.330914	1.76775	2.01526	2.10305	1.87146	2.50237	2.3133	2.5121	1.60603	1.71099	1.88765	2.10557
Solyc08g074620.1.1				Y					Y	Y	1073.81	1164.92	318.45	362.041	726.767	861.723	616.489	626.825	222.506	250.488	902.402	1048.18	655.929	708.629
Solyc08g074630.1.1				Y		Y	Y		Y		785.995	798.37	2163.08	2150.04	587.29	632.754	512.779	499.839	1546.66	1699.31	1124.03	1091.51	1273.48	1143.3
Solyc08g074660.1.1							Y				95.2464	99.0412	62.4325	51.3226	99.4903	89.9052	120.241	116.304	38.5551	30.9931	71.8936	64.0633	67.7265	52.9062
Solyc08g074680.2.1			Y	Y	Y	Y	Y	Y	Y		41.1698	37.2691	748.969	808.527	54.7303	67.3632	27.76	24.6129	1295.02	1311.16	648.082	621.417	509.036	423.131
Solyc08g075020.2.1				Y							8.29049	6.5547	3.30914	3.70937	5.19725	3.81177	5.92628	5.00474	4.88364	3.14013	5.19599	5.06715	4.69052	3.9739
Solyc08g075150.2.1			Y			Y					51.0619	61.3259	63.9768	66.9716	65.1248	54.2192	48.19	50.0474	117.721	97.3755	51.2041	38.4643	115.146	117.378
Solyc08g075430.2.1								Y			10.1747	9.16286	10.0377	7.99833	5.93972	7.55782	9.51324	9.89744	18.9348	16.5799	11.7146	11.2201	16.2452	15.1542
Solyc08g075490.2.1			Y	Y		Y	Y	Y	Y		7.44259	7.00083	1.21335	1.04326	5.62152	5.58622	6.70606	7.76856	0.42839	0.847835	3.58996	5.00134	1.25843	1.57177
Solyc08g075540.2.1				Y			Y		Y	Y	2.16683	2.16202	0.441219	0.347754	0.848531	1.57728	0.935729	2.98791	0.514068	0.408217	1.41709	0.789686	1.31563	1.03796
Solyc08g075640.2.1				Y			Y		Y	Y	0.65947	0.274542	4.5225	3.33264	0.424266	0.328601	0.155955	0.63493	1.11381	1.41306	0.37789	0.9213	0.80082	0.800711
Solyc08g075870.2.1		Y	Y	Y		Y	Y				43.6193	42.5541	10.2583	12.751	17.2888	17.6787	34.7779	32.9043	9.08186	9.89141	27.1136	25.27	11.7835	12.1589
Solyc08g075940.2.1				Y			Y		Y	Y	15.1678	14.9626	51.8432	57.4083	24.5013	22.3449	15.9074	18.2636	36.9272	41.2299	31.176	28.6261	25.9122	28.707
Solyc08g075990.2.1			Y								5.46418	6.10857	4.30189	3.3906	4.03052	3.54889	5.92628	4.48186	2.82737	2.82612	5.38494	4.27747	2.17365	3.14353
Solyc08g076060.2.1				Y			Y				8.10206	10.1581	2.97823	3.27468	4.03052	6.30914	5.45842	7.61916	1.5422	1.57007	5.95177	5.82393	5.03373	5.66429
Solyc08g076220.2.1		Y	Y								43.9961	48.0106	24.7083	27.4436	20.3647	19.9132	36.0256	30.8875	20.477	18.3698	18.0443	23.2628	16.1308	17.9122
Solyc08g076290.2.1			Y	Y			Y				25.9078	26.1845	12.7954	9.76608	14.5311	15.1814	23.7051	20.6539	9.42457	8.44695	17.0995	13.0956	11.8979	11.5065
Solyc08g076400.2.1										Y	8.3847	8.68241	4.30189	4.57876	7.63678	7.1635	9.82515	6.3493	8.31076	6.81408	8.9749	8.81816	10.2391	12.8114
Solyc08g076670.2.1				Y							15.1678	16.2666	31.4369	32.2831	17.2888	16.7586	17.9348	17.2178	32.3863	25.4037	22.6734	22.0454	24.3678	21.7378
Solyc08g076850.2.1			Y			Y	Y	Y			1.41315	0.892263	2.09579	2.02856	1.37886	1.57728	1.40359	0.33614	8.48212	9.95422	2.36181	2.17164	2.68847	3.88493
Solyc08g076860.2.1						Y	Y				4.61629	5.0104	4.85341	3.15876	6.25792	5.8491	9.82515	7.28302	2.91305	3.42274	4.25127	6.67943	3.43209	3.85527
Solyc08g076870.1.1				Y							2.26104	1.85316	0.661829	0.840405	1.591	1.57728	1.40359	0.97107	0.42839	1.22465	1.13367	1.48066	1.43004	1.03796
Solyc08g076960.1.1			Y	Y		Y	Y	Y	Y		9.3268	8.44218	3.75036	2.86897	9.12171	7.95214	12.0085	9.636	2.57034	2.54351	8.78595	8.45622	3.14608	3.02491
Solyc08g076970.2.1		Y	Y	Y			Y		Y	Y	0.0942101	0.0686356	3.97097	5.44814	0.318199	0.591482	1.24764	0.224093	4.62661	3.92516	2.92865	4.24456	1.43004	0.919334
Solyc08g077010.1.1		Y	Y	Y	Y	Y	Y	Y		Y	0.47105	0.205907	3.86067	4.63672	4.45479	4.20609	0.935729	0.33614	14.1369	11.0847	1.0392	2.36906	17.6752	20.1957
Solyc08g077170.2.1		Y	Y	Y	Y	Y	Y		Y		6.78312	4.46132	0.551524	0.782446	1.2728	2.23449	4.8346	5.82642	2.74169	3.23434	1.51156	1.94131	0.686417	1.09727
Solyc08g077210.2.1				Y		Y	Y	Y	Y	Y	1.60157	1.40703	5.95646	9.30241	0.636398	0.591482	0.935729	0.485535	6.85424	7.81893	1.41709	1.51356	3.08888	2.19454
Solyc08g077510.2.1		Y	Y	Y		Y	Y		Y		25.8136	23.9538	5.40493	3.2457	9.33384	8.54362	17.311	14.1179	4.19822	5.14982	8.78595	7.60073	7.15018	5.93119
Solyc08g077530.2.1		Y		Y	Y		Y	Y	Y	Y	5.08734	5.45653	24.7083	31.5007	1.69706	2.69453	4.67864	4.8927	26.2175	32.4376	1.98392	4.70521	4.46171	5.69394
Solyc08g078020.1.1		Y	Y	Y		Y	Y	Y			7.44259	6.00562	1.54427	0.463672	1.591	2.43165	5.92628	2.20358	1.11381	0.659428	2.55076	1.44776	0.572014	0.860023
Solyc08g078090.1.1				Y			Y		Y	Y	2.35525	2.40225	10.6996	13.7073	4.77299	3.22029	2.96314	2.87586	13.2801	16.2031	4.91257	6.02136	5.20533	4.00355
Solyc08g078590.1.1		Y	Y	Y	Y	Y	Y	Y		Y	1.69578	1.68157	5.40493	4.31794	3.18199	3.68033	1.40359	1.41926	11.3095	11.6499	4.62916	4.17875	9.43824	9.81612
Solyc08g078640.1.1			Y	Y		Y	Y	Y			13.6605	16.7814	6.61829	7.27385	12.4098	12.3554	20.8979	14.3046	2.14195	1.72707	11.8091	11.1543	4.1757	3.9739
Solyc08g078670.2.1		Y	Y	Y	Y	Y	Y		Y	Y	2.63788	3.56905	27.0247	29.5301	7.53071	6.30914	4.21078	2.76381	8.05373	13.0315	10.8643	8.65364	6.29216	6.93949
Solyc08g078700.2.1				Y			Y		Y	Y	107.305	96.7076	31.5472	8.46201	127.28	122.568	76.7298	102.597	24.1612	9.5774	19.5558	3.12584	149.525	119.395
Solyc08g078850.2.1			Y	Y			Y				5.6526	5.42221	14.4499	14.3159	8.27318	6.76918	8.2656	5.97581	13.9655	17.6161	5.47941	4.73812	13.4423	11.981
Solyc08g078870.1.1	Y		Y	Y			Y	Y	Y	Y	4.05103	4.52995	0	0.0289795	1.9092	2.43165	1.24764	2.12888	0.171356	0.219809	0.755781	1.08582	0.80082	1.21589
Solyc08g078890.1.1		Y	Y	Y	Y	Y	Y				43.525	40.2205	424.122	296.663	213.512	191.18	82.1882	79.0675	188.663	181.343	205.856	149.909	192.883	168.001
Solyc08g078910.1.1			Y	Y		Y	Y		Y		6.87733	5.21631	14.6705	16.5183	5.93972	7.75498	7.79774	4.93005	12.2519	14.3818	12.5649	10.3975	13.2707	12.6334
Solyc08g078940.1.1				Y			Y		Y	Y	38.8145	26.2531	99.2743	95.1396	26.8348	23.7907	38.2089	19.0106	59.5462	63.3364	31.3649	29.0539	25.3974	29.478
Solyc08g078950.2.1			Y	Y		Y	Y	Y			5.55839	5.5938	1.32366	2.81101	5.40939	3.68033	5.30246	5.97581	0.171356	0.376816	2.7397	5.62651	1.25843	1.92764
Solyc08g078960.2.1			Y	Y		Y	Y		Y	Y	60.3886	65.2382	10.9202	10.0269	35.7444	41.8638	56.6116	60.9533	10.367	7.59912	40.1508	41.6888	22.3086	28.1435
Solyc08g078970.1.1				Y		Y	Y		Y		6.40628	5.07904	1.76488	1.59387	7.53071	4.14037	7.64179	5.60233	1.45653	1.25605	6.70755	4.5736	2.57406	3.67734
Solyc08g079020.2.1			Y			Y					33.5388	32.8421	57.0276	43.8459	40.1992	52.2475	33.9981	31.9333	105.47	86.1652	43.174	39.4843	93.0095	91.37
Solyc08g079030.2.1						Y	Y	Y			8.10206	8.75104	9.37591	11.2151	5.62152	5.8491	5.77033	5.00474	17.821	14.947	7.36886	8.71945	13.3851	13.7307
Solyc08g079040.1.1		Y		Y							10.2689	10.364	5.07402	4.98447	3.92446	5.71766	8.10965	7.73121	4.88364	3.67395	5.47941	5.79103	4.1185	6.04981
Solyc08g079100.2.1			Y	Y			Y				152.338	157.759	55.373	69.232	126.113	120.202	133.341	140.544	10.2814	10.2054	128.955	124.902	71.4446	79.7448
Solyc08g079310.2.1		Y	Y	Y		Y	Y				5.27576	6.21152	0.551524	1.10122	1.591	1.90589	4.05482	3.0626	0.856779	0.785033	1.13367	0.625168	0.915223	1.86832
Solyc08g079480.2.1				Y							0.847891	1.02953	2.53701	2.46325	2.01526	1.57728	0.935729	1.38191	2.57034	2.00968	1.51156	1.57937	1.43004	1.36417
Solyc08g079650.2.1			Y			Y					12.7184	15.0312	25.4804	24.6905	17.8192	21.5562	15.7514	14.8275	22.1906	21.4157	20.3116	20.5318	39.8122	33.1554
Solyc08g079700.1.1		Y	Y	Y		Y	Y		Y		52.8518	34.1462	303.669	250.209	114.127	92.7969	60.6664	58.6377	145.224	156.63	85.3087	70.5124	164.969	168.031
Solyc08g079840.1.1			Y	Y			Y		Y		16.1099	13.1094	2.64731	3.44856	8.27318	7.1635	7.17392	9.59865	3.94119	3.98797	5.38494	5.5278	6.12055	6.02016
Solyc08g080010.1.1				Y			Y		Y	Y	6.68891	7.17242	3.08853	2.1155	4.77299	6.63774	7.01797	5.60233	2.99873	2.3551	3.21207	3.48778	6.12055	5.33807
Solyc08g080040.2.1	Y	Y	Y	Y		Y	Y		Y	Y	138.489	141.767	4.74311	5.33222	31.5017	39.9579	60.3545	70.9628	7.62534	7.85033	16.8161	24.4145	18.4189	20.6999
Solyc08g080120.2.1			Y	Y		Y	Y	Y			6.78312	10.1924	2.75762	2.28938	4.03052	4.60041	4.99055	6.38665	1.5422	0.847835	3.58996	4.67231	2.05925	1.60142
Solyc08g080210.2.1										Y	102.595	119.083	103.135	97.7767	119.325	127.3	115.563	123.774	146.424	131.98	100.802	106.476	214.448	209.074
Solyc08g080280.2.1				Y		Y	Y				3.01472	2.57384	1.21335	0.985302	1.2728	2.10305	3.43101	3.0626	0.942457	0.879237	2.26734	2.13873	1.65884	1.42349
Solyc08g080430.1.1				Y							2.16683	1.85316	0.772133	0.898364	1.591	0.657202	0.935729	1.49395	1.02814	1.25605	1.51156	0.756782	1.60164	1.7497
Solyc08g080460.1.1			Y	Y		Y	Y	Y			9.23259	9.71194	26.9144	25.9946	16.8646	16.1014	10.9168	10.1215	18.1637	16.0147	21.9176	15.5634	38.5538	38.9086
Solyc08g080520.2.1										Y	32.314	38.1957	26.6938	25.6179	35.9565	45.1498	36.3375	40.4488	44.2955	46.4425	32.4041	33.9565	51.0809	59.816
Solyc08g080540.2.1		Y	Y								23.2699	17.9482	39.7097	28.7187	59.1851	49.7502	30.2552	43.8102	30.1586	26.5341	22.6734	13.4247	60.1187	54.7152
Solyc08g080570.2.1			Y	Y			Y	Y	Y	Y	5.27576	5.52517	23.164	27.0089	4.34872	5.5205	6.86201	6.87219	27.4169	27.9472	17.0051	19.2157	9.20943	15.1542
Solyc08g080590.2.1			Y	Y		Y		Y		Y	2.44946	4.46132	1.87518	1.36204	1.37886	1.97161	5.61437	1.83009	1.11381	3.64255	3.21207	8.06138	0.40041	0.385527
Solyc08g080890.2.1				Y			Y				16.3925	15.7519	4.96371	7.33181	10.3945	13.6041	11.8526	14.0805	11.7379	10.7392	12.0925	11.3846	10.4107	12.1293
Solyc08g080990.2.1							Y				15.3562	14.5508	7.50072	7.67956	12.5158	15.6414	18.2467	14.2673	7.3683	6.56287	20.4061	15.8595	10.5251	10.7355
Solyc08g081070.2.1				Y			Y		Y	Y	37.4014	43.2748	15.2221	15.1852	29.9107	32.8601	36.3375	38.9175	22.7903	18.5896	33.1599	35.3713	30.5456	30.5753
Solyc08g081160.2.1									Y		23.1757	22.7527	38.9376	43.9329	20.0466	20.7019	21.6777	22.0732	51.0641	50.1479	22.5789	25.7964	32.2044	39.1459
Solyc08g081220.1.1			Y	Y		Y	Y		Y		6.5947	6.82924	1.43396	1.24612	5.09119	4.73185	8.2656	5.37823	0.685424	1.35026	3.58996	4.77102	2.00205	2.81732
Solyc08g081370.1.1		Y						Y	Y		8.66733	5.79971	11.4717	8.05629	4.03052	3.02313	8.2656	4.33246	13.9655	12.4663	4.62916	4.31037	9.38103	9.43059
Solyc08g081480.2.1				Y							31.1835	27.9347	61.6604	56.3651	38.0778	37.0005	37.5851	30.9622	55.2623	51.561	42.0403	42.8405	36.3229	42.1708
Solyc08g081740.2.1				Y		Y	Y	Y	Y	Y	2.16683	2.43656	18.3106	19.822	0.636398	1.90589	1.09168	1.41926	5.055	6.40587	0.850253	1.71099	3.8325	3.52906
Solyc08g081890.2.1		Y	Y	Y		Y	Y		Y		20.2552	22.3409	2.3164	2.14448	6.47005	8.21502	12.1645	10.4577	0.856779	0.659428	9.54173	9.87107	3.9469	4.59667
Solyc08g082210.2.1		Y	Y	Y			Y				11.4936	11.4965	3.52975	3.85427	5.09119	4.99473	7.01797	7.9553	2.48466	0.942039	4.15679	2.36906	4.23291	5.01186
Solyc08g082400.1.1		Y									2.35525	3.05429	2.53701	2.20244	1.69706	1.11724	2.02741	2.20358	1.97059	1.97828	2.83418	2.7968	1.25843	1.86832
Solyc08g082590.2.1				Y			Y				40.2277	34.2835	20.9579	15.2722	43.5933	26.6824	45.6948	39.291	16.5358	15.4808	21.1619	18.5247	21.6793	24.5848
Solyc08g082620.2.1				Y			Y				42.3003	42.5198	14.0087	15.0693	27.6833	26.9453	39.4566	33.5019	16.0218	19.2804	29.0031	27.8364	23.4526	26.3345
Solyc08g082630.2.1			Y	Y		Y	Y	Y	Y	Y	205.566	203.985	21.2888	21.184	155.599	137.092	254.83	240.078	15.3364	16.7369	106.093	126.087	56.2862	78.4993
Solyc08g082870.2.1				Y		Y	Y		Y		17.7115	14.0017	40.9231	38.5717	18.2434	17.4158	14.6598	14.454	40.0973	44.6841	20.5005	17.5705	29.2299	30.3677
Solyc08g082890.2.1				Y					Y		6.40628	5.52517	15.3324	13.8522	5.19725	6.44058	8.57751	6.61074	9.93864	8.22714	13.2262	11.2859	9.60984	8.60023
Solyc08g082900.2.1				Y		Y	Y		Y		4.61629	4.427	1.98549	1.53591	4.03052	4.14037	5.77033	4.14572	1.88491	2.10389	4.15679	4.77102	1.88765	2.58007
Solyc08g082940.2.1				Y			Y		Y	Y	21.7625	21.8261	7.39042	9.09955	16.8646	21.4905	26.6683	23.5671	9.59593	7.63052	18.1387	21.1241	18.4189	19.8398
Solyc08g083050.1.1		Y	Y	Y	Y	Y	Y	Y	Y	Y	2.16683	1.13249	146.154	145.158	10.9248	9.46371	2.49528	1.71805	72.6549	77.4984	18.989	17.7679	49.136	43.2087
Solyc08g083190.2.1				Y			Y		Y	Y	30.9009	32.1215	10.5893	11.1281	22.5921	25.1708	28.2278	27.1153	16.8786	16.3287	18.8945	18.3931	23.3954	25.771
Solyc08g083210.2.1				Y			Y		Y	Y	14.5083	14.4478	67.1756	64.972	24.8195	30.6256	18.5586	14.0805	32.0436	38.0898	61.1238	57.1535	25.5118	25.4151
Solyc08g083230.1.1				Y			Y		Y	Y	23.3641	25.4981	70.4847	63.9867	34.5776	31.3485	34.466	32.12	37.5269	40.4135	39.2061	39.6488	24.139	23.5172
Solyc08g083360.2.1		Y	Y		Y	Y					2.07262	2.1277	1.43396	0.956323	0.742465	0.657202	2.80719	1.5313	0.42839	0.376816	1.41709	1.02001	0.686417	0.711743
Solyc08g083400.2.1			Y	Y		Y	Y	Y	Y		6.21786	8.099	3.08853	2.78203	7.74285	6.8349	7.64179	9.29986	0.599746	1.38166	6.8965	6.64652	3.54649	2.84697
Solyc08g083520.1.1							Y		Y		0.75368	1.13249	0.992743	0.318774	1.69706	1.24868	0.935729	2.05419	0.599746	0.314013	1.0392	0.723879	0.858021	1.18624
Solyc09g005070.1.1		Y	Y		Y	Y			Y	Y	0	0.102953	0.330914	0.115918	5.19725	6.11198	0.31191	0.298791	12.1663	14.6644	0.566835	1.71099	9.43824	13.1376
Solyc09g005110.2.1		Y	Y	Y		Y	Y	Y	Y		1.8842	2.43656	26.2525	33.4133	4.56086	6.04626	2.18337	3.02526	23.4758	30.6791	7.27439	9.80527	14.186	16.3997
Solyc09g005120.2.1				Y			Y		Y	Y	32.314	27.5572	12.2438	8.49098	20.2587	30.5599	18.7146	28.049	12.509	10.2996	10.4865	8.42332	33.5772	33.274
Solyc09g005260.2.1				Y			Y		Y	Y	4.61629	3.22587	0.441219	0.347754	2.43953	4.20609	2.18337	2.76381	0.685424	0.47102	1.51156	5.62651	3.71809	3.73665
Solyc09g005400.2.1		Y	Y	Y		Y	Y	Y	Y		0.0942101	0.0686356	15.7736	15.2142	0.424266	0.788642	0.31191	0.112047	24.5039	18.5268	0.850253	2.40196	24.139	23.6951
Solyc09g005650.1.1				Y			Y		Y		26.7557	35.0728	10.3686	8.40405	20.0466	21.1619	30.8791	26.2936	10.1957	8.54116	35.3327	32.0481	15.616	16.4294
Solyc09g005690.2.1		Y	Y			Y				Y	2.73209	2.5052	5.84615	3.88325	7.31858	4.20609	4.05482	3.84693	11.0525	10.7392	3.40101	4.11295	10.8111	9.81612
Solyc09g005880.1.1			Y			Y	Y	Y	Y		1.8842	2.67679	3.41945	4.83957	1.48493	2.49737	1.55955	1.606	4.19822	5.71504	2.7397	1.8755	5.49134	6.90984
Solyc09g006010.2.1		Y	Y			Y		Y		Y	13.2836	19.1493	9.81712	9.21547	6.47005	8.1493	16.9991	7.99265	8.31076	13.22	13.9819	29.4487	1.83045	1.63108
Solyc09g007150.2.1				Y			Y				18.371	19.2523	43.2395	36.0505	19.7284	19.7161	17.311	18.2636	32.3006	29.2346	63.769	63.9317	32.376	34.1043
Solyc09g007260.2.1				Y			Y		Y	Y	17.1462	18.7032	155.53	158.807	16.4403	14.1298	16.2193	19.1973	34.9566	38.1212	19.8392	21.8151	24.1962	19.3653
Solyc09g007270.2.1							Y				22.3278	19.115	12.7954	10.4326	19.3041	19.7818	22.3015	25.1358	9.68161	7.47351	6.61308	4.6065	20.4781	18.5943
Solyc09g007770.2.1			Y	Y							4.14524	1.23544	0.441219	0.724487	1.16673	0.657202	1.7155	0.485535	1.62788	0.596625	0.283418	0.82259	0.286007	1.12693
Solyc09g007830.2.1			Y	Y		Y	Y		Y	Y	48.8008	53.7074	2.2061	4.46284	25.9863	27.011	45.2269	49.4499	7.19695	6.15466	21.6342	25.7306	19.2769	19.4246
Solyc09g007940.2.1			Y								1.31894	1.37271	1.32366	0.782446	0.636398	1.05152	1.7155	0.746977	0.856779	0.72223	0.472363	0.9213	0.572014	0.593119
Solyc09g008000.2.1				Y			Y		Y	Y	6.50049	8.099	2.2061	2.28938	5.93972	4.46897	5.45842	5.11679	2.39898	2.70051	3.40101	5.19877	5.37693	5.36773
Solyc09g008320.2.1		Y	Y	Y	Y	Y	Y		Y	Y	39.7566	33.2883	1.21335	1.10122	14.1068	12.8812	32.9065	26.0321	1.88491	1.88408	10.203	9.96978	9.38103	8.89678
Solyc09g008550.2.1		Y									4.42787	3.94655	3.30914	2.46325	1.16673	2.43165	1.87146	3.77223	2.99873	2.19809	1.79498	1.51356	2.17365	2.2242
Solyc09g008670.2.1			Y			Y	Y	Y	Y		1.78999	3.15724	4.41219	5.73794	2.54559	1.90589	2.49528	1.00842	3.59847	3.48555	9.82515	13.0956	7.49339	9.40094
Solyc09g008770.2.1			Y	Y			Y		Y	Y	2.07262	2.57384	0.551524	0.666528	4.98512	2.56309	2.80719	4.6686	7.45398	5.62083	0.566835	0.526457	5.83455	6.16844
Solyc09g008810.2.1		Y	Y	Y							1.60157	2.33361	0.551524	0.637548	0.530332	0.985803	1.7155	1.04577	0	0.314013	0.944726	0.723879	0.286007	0.830367
Solyc09g008830.2.1		Y	Y	Y	Y	Y	Y	Y	Y	Y	17.5231	19.0807	169.538	249.194	50.1694	36.2118	21.9896	20.131	140.94	127.238	62.5408	68.0117	97.0136	97.7757
Solyc09g008860.2.1			Y	Y			Y				45.7861	42.9659	14.6705	14.3738	27.2591	28.9169	26.9802	33.7633	16.2788	17.2393	31.6483	37.4772	18.8765	21.4709
Solyc09g008970.1.1				Y			Y		Y	Y	35.9882	31.9499	18.2003	7.65058	54.6242	43.3096	33.8422	36.3031	21.5908	10.6136	11.8091	5.33038	42.8439	37.6037
Solyc09g008990.2.1		Y									4.05103	2.67679	1.32366	1.99958	1.16673	1.643	1.40359	2.09153	1.19949	1.19325	1.60603	1.61228	2.00205	1.77936
Solyc09g009250.2.1			Y	Y		Y	Y		Y		6.87733	8.099	2.3164	1.88367	4.66692	5.8491	9.35729	7.02158	3.68415	4.08217	6.51861	6.25168	2.68847	3.38078
Solyc09g009260.2.1				Y			Y		Y		187.101	159.646	407.686	450.312	192.086	183.951	136.616	157.761	213.595	295.329	170.712	168.368	231.494	221.56
Solyc09g009420.1.1		Y	Y	Y		Y	Y	Y	Y	Y	12.9068	11.2562	0.661829	0.637548	5.40939	5.5205	13.5681	8.88902	0.942457	0.785033	4.25127	2.23744	1.88765	2.2242
Solyc09g009580.2.1				Y							11.4936	11.5651	5.18432	4.89753	5.72759	6.1777	9.98111	7.9553	3.08441	3.45414	6.32966	6.21878	6.00615	7.82917
Solyc09g009620.1.1			Y						Y	Y	7.72522	5.90266	3.86067	5.18733	10.3945	9.59515	10.293	7.91795	6.34017	7.31651	19.1779	17.0441	13.2135	16.5777
Solyc09g009660.2.1			Y	Y		Y	Y		Y	Y	14.4141	16.9187	1.87518	1.04326	8.90958	10.3838	14.8157	15.4998	0.685424	0.942039	10.0141	10.7595	5.09093	6.10913
Solyc09g009670.2.1		Y	Y	Y	Y	Y	Y		Y	Y	2.54367	2.64247	0.22061	0.144897	0.424266	0.722922	1.87146	1.83009	0.171356	0.0942039	1.22814	1.31614	0.40041	1.0083
Solyc09g010120.2.1		Y	Y								5.18155	5.35358	3.41945	2.75305	1.80313	1.84017	4.36673	3.1373	2.74169	2.79472	3.49549	3.78391	2.74567	2.46144
Solyc09g010230.1.1		Y	Y		Y	Y			Y	Y	3.10893	1.44135	4.5225	3.50652	10.0763	8.67506	2.80719	2.16623	23.8185	22.1065	2.92865	2.33615	17.6752	18.8315
Solyc09g010430.1.1			Y	Y		Y	Y	Y	Y		7.91364	6.00562	3.64006	1.9706	7.21252	4.79757	9.35729	5.11679	3.42712	2.70051	8.78595	7.20588	2.45966	1.72005
Solyc09g010600.1.1							Y				3.86261	7.06947	4.96371	4.28896	7.74285	8.74078	13.2562	8.92637	6.42585	5.30682	6.61308	7.04137	8.80902	8.51126
Solyc09g010680.2.1		Y	Y	Y	Y	Y	Y				2.44946	1.64725	0.441219	0.318774	0.530332	0.394321	1.55955	1.4566	1.11381	1.06764	0.755781	1.54647	0.629216	0.682087
Solyc09g010800.2.1			Y	Y		Y	Y	Y	Y		571.101	570.053	173.289	149.273	512.301	380.914	671.853	624.958	195.774	180.338	302.312	315.841	244.25	198.991
Solyc09g010970.2.1				Y			Y				23.7409	26.2531	10.5893	9.85302	13.1522	18.3359	22.4575	18.9359	14.0512	10.2996	17.8553	16.5176	15.5588	15.7177
Solyc09g011060.2.1				Y			Y		Y	Y	1.78999	1.26976	2.97823	3.65141	0.742465	1.77444	1.87146	1.23251	3.34144	2.54351	1.41709	1.02001	0.743619	1.69039
Solyc09g011080.2.1		Y	Y	Y	Y	Y	Y	Y	Y	Y	124.075	105.218	1.65457	1.41999	31.8199	33.3201	77.0417	87.2469	3.85551	2.92032	6.70755	4.5736	13.6139	16.8149
Solyc09g011160.2.1							Y		Y		255.403	249.388	170.311	118.845	337.821	319.729	283.526	313.917	157.904	116.656	151.534	89.4319	279.543	271.826
Solyc09g011330.1.1				Y							4.61629	4.70154	8.38316	9.99792	4.45479	5.45478	4.52269	5.15414	9.59593	12.4977	3.7789	4.47489	6.92137	8.12573
Solyc09g011600.2.1				Y			Y		Y	Y	7.72522	9.78058	2.09579	2.43428	4.66692	5.78338	8.10965	6.3493	3.08441	2.3551	4.06232	6.18587	4.34731	7.32502
Solyc09g011720.2.1										Y	63.7802	65.5127	43.9013	42.7157	78.277	81.9531	80.4727	74.4362	94.5028	90.216	66.1308	70.4137	100.217	101.572
Solyc09g011750.2.1			Y			Y		Y		Y	3.39156	2.57384	2.86792	2.86897	2.33346	4.20609	2.18337	2.01684	10.7954	11.4301	1.41709	2.43486	9.83865	9.72715
Solyc09g011810.2.1		Y	Y	Y		Y					11.7763	12.4574	3.97097	4.28896	4.24266	4.86329	7.79774	6.98423	3.76983	3.29714	3.87338	5.06715	2.63127	3.35112
Solyc09g011860.2.1				Y			Y		Y		2.26104	3.22587	1.87518	1.24612	2.96986	2.89169	3.1191	3.02526	2.39898	2.60631	2.17287	3.09294	2.63127	2.90628
Solyc09g014220.2.1			Y	Y		Y	Y		Y	Y	3.67419	4.32404	0	0.0869384	2.65166	1.84017	3.74292	2.65177	0.257034	0.0314013	1.70051	2.00712	0.228806	1.51245
Solyc09g014250.2.1			Y	Y			Y				13.8489	15.7176	3.97097	5.12937	7.63678	9.00366	10.9168	11.0179	6.25449	4.8358	8.12464	8.88397	7.55059	7.02846
Solyc09g014350.2.1								Y		Y	1.22473	1.23544	1.54427	1.88367	1.48493	1.97161	1.40359	1.08312	1.45653	1.63287	1.70051	2.89552	0.514813	0.771055
Solyc09g014480.1.1				Y			Y		Y		7.34838	6.76061	13.7881	16.1416	5.19725	4.53469	5.92628	6.31195	26.3888	30.3337	9.44726	16.024	8.75182	8.83747
Solyc09g014530.2.1			Y	Y	Y	Y	Y	Y	Y	Y	1.69578	0.720674	23.3846	21.4158	2.75773	1.05152	0.623819	0.373488	60.0602	50.9643	1.32262	1.71099	11.0971	11.1506
Solyc09g014550.2.1		Y	Y	Y	Y	Y	Y	Y	Y		1.22473	0.960899	35.8491	30.7472	1.69706	3.02313	1.24764	0.672279	50.807	38.5922	2.45629	4.34327	31.804	27.1352
Solyc09g014610.2.1		Y	Y	Y		Y	Y	Y	Y		4.61629	3.12292	0.330914	0.405713	1.37886	1.44584	2.02741	1.79274	0	0.0942039	0.755781	0.888397	0.343209	0.593119
Solyc09g014900.2.1			Y	Y				Y	Y		4.42787	4.18677	9.70682	10.5485	4.66692	5.12617	5.30246	5.82642	14.2225	12.3407	6.32966	7.40331	10.6395	10.9134
Solyc09g015000.2.1				Y			Y		Y	Y	29.8646	34.4208	10.9202	6.46242	34.7898	29.0483	36.9613	37.4982	7.45398	5.33822	8.597	7.20588	33.4628	27.4318
Solyc09g018010.2.1				Y			Y		Y	Y	27.6978	28.0033	114.276	120.902	30.4411	30.9542	34.1541	23.9406	89.7905	93.9527	33.1599	44.7489	50.8521	43.7425
Solyc09g018280.1.1				Y		Y	Y		Y		26.473	20.8309	10.5893	8.63588	25.3499	18.8617	40.5482	29.8791	16.8786	18.9978	18.8945	22.2757	13.4423	16.726
Solyc09g018640.1.1						Y					1.8842	0.960899	1.10305	1.18816	1.48493	1.05152	0.31191	0.933721	0.856779	1.41306	1.88945	1.31614	1.65884	1.69039
Solyc09g019980.2.1			Y			Y				Y	6.78312	6.45175	8.38316	7.79548	8.27318	10.2523	4.99055	6.01316	14.9936	16.4229	8.597	8.2259	18.9337	17.9122
Solyc09g025280.1.1			Y			Y		Y		Y	11.682	7.65287	9.1553	7.9114	7.63678	8.01786	7.17392	6.31195	24.1612	25.4665	12.8483	13.655	25.855	25.7117
Solyc09g030450.2.1							Y				16.9578	17.1932	9.48621	10.7514	21.8497	17.0215	22.9254	19.6455	5.31203	5.40103	20.3116	19.9396	16.9316	16.2515
Solyc09g042660.2.1			Y								4.33366	4.87313	6.8389	7.41874	4.13659	5.98054	7.48583	5.22884	8.56779	7.1909	6.42414	6.25168	10.8111	9.40094
Solyc09g048980.2.1			Y			Y					11.3052	13.4183	7.16981	6.31752	7.74285	8.54362	10.293	11.354	6.16881	5.40103	8.31359	9.96978	5.77734	5.27876
Solyc09g055320.1.1							Y				0.847891	1.44135	1.76488	1.85469	0.742465	1.3144	0.935729	0.709628	1.5422	1.75847	1.41709	1.34905	1.14403	1.42349
Solyc09g055660.1.1				Y			Y		Y	Y	1.78999	1.9218	0.22061	0.144897	1.591	2.49737	2.80719	2.09153	0.771102	0.376816	0.283418	0.394843	2.74567	2.90628
Solyc09g057710.2.1										Y	6.12365	6.65766	4.6328	4.86855	9.33384	8.08358	8.42156	5.63967	6.34017	8.16434	7.55781	8.12718	9.03783	10.4092
Solyc09g057790.2.1									Y		3.29735	2.09339	1.10305	2.17346	4.87905	3.22029	2.65123	2.31563	2.3133	2.3551	2.45629	2.04002	1.88765	2.63938
Solyc09g058980.2.1							Y				2.35525	2.5052	1.98549	1.76775	3.71232	1.643	6.23819	2.53972	2.05627	1.72707	1.88945	2.17164	2.51686	1.63108
Solyc09g059170.1.1		Y									65.1934	74.6756	52.1742	48.9753	25.2438	41.0751	45.5388	41.868	29.9016	27.0365	13.6041	16.2215	54.799	47.9833
Solyc09g059550.1.1			Y	Y			Y				1.8842	2.43656	5.84615	6.23059	2.75773	3.74605	2.65123	2.76381	4.11254	3.57975	3.96785	3.02713	5.43414	4.65598
Solyc09g059650.2.1				Y			Y				5.93523	6.58902	3.08853	3.04284	4.34872	5.71766	6.08224	6.16256	2.82737	2.07249	2.7397	2.36906	5.20533	5.30841
Solyc09g060100.2.1			Y	Y		Y	Y		Y		3.95682	5.49085	1.76488	0.753466	2.01526	3.28601	4.8346	4.51921	1.19949	0.659428	2.55076	1.8097	1.02963	2.31316
[truncated: 583 more rows]

## Sheet: S. peruvianum
geneid	groupMVM-groupLVM	groupMVM-groupTM	groupMVM-groupFM	groupLVM-groupTM	groupLVM-groupFM	groupTM-groupFM	Speru_FM1	Speru_FM2	Speru_LVM1	Speru_LVM2	Speru_MVM1	Speru_MVM2	Speru_SIM1	Speru_SIM2	Speru_TM1	Speru_TM2
Solyc00g005440.1.1		Y		Y	Y		2.77025	3.08552	6.09438	6.5098	4.75236	5.10039	5.08365	3.96041	1.70406	2.03405
Solyc00g006690.2.1		Y					114.188	105.62	128.128	116.672	180.717	197.446	178.534	201.003	70.5894	64.0218
Solyc00g008570.2.1		Y		Y		Y	6.48643	7.41712	7.60579	7.83927	10.2685	12.9346	9.00132	8.01401	2.99501	2.03405
Solyc00g008580.1.1		Y	Y	Y	Y		29.7295	30.5585	5.3143	6.46396	9.80174	9.54793	48.5045	52.9763	43.7892	44.444
Solyc00g009110.2.1		Y		Y		Y	11.4188	10.0873	15.8941	15.4493	12.5174	12.2817	8.34838	7.64127	40.4843	41.6472
Solyc00g009120.2.1			Y				1.95944	1.36475	2.48651	2.70478	3.43697	3.38666	1.49245	2.14328	2.27208	1.8815
Solyc00g009760.2.1		Y					20.4728	16.6143	20.1358	26.6352	29.2355	33.6626	38.7104	39.4178	12.2382	12.3569
Solyc00g009780.1.1			Y	Y	Y		1.89188	2.31414	1.07261	0.641811	0.891067	0.897669	1.77228	2.0035	1.0844	2.33916
Solyc00g010530.1.1	Y			Y	Y		1.55404	1.6021	0.828836	0.733499	2.54591	2.69301	1.72564	1.3512	2.01389	1.47469
Solyc00g011150.1.1		Y					41.4186	40.3491	34.8111	38.7837	67.9333	66.0603	58.7651	59.9187	30.8796	31.4769
Solyc00g012440.1.1			Y				1.95944	1.83944	2.48651	2.24634	3.94616	4.52915	4.33743	4.23997	2.01389	2.59342
Solyc00g019980.2.1			Y		Y	Y	2.43241	1.89878	0.438795	0.779342	0.763772	0.693653	1.39917	0.792083	0.671296	0.508513
Solyc00g020020.2.1			Y			Y	3.04051	3.08552	1.56016	1.74206	1.31539	1.3057	2.23867	2.79559	1.0844	1.37298
Solyc00g021640.2.1					Y		1.75674	2.07679	1.02386	0.458437	1.01836	1.02008	1.53909	1.58417	0.619658	1.37298
Solyc00g050430.2.1						Y	19.2566	19.0472	14.2365	13.8906	12.0506	12.649	16.4636	14.77	7.849	7.8311
Solyc00g068980.1.1				Y	Y		69.121	74.9425	24.9626	32.8241	45.7415	45.3323	79.6128	92.4873	61.3461	70.785
Solyc00g084870.2.1		Y		Y			3.44592	2.2548	1.70643	2.15465	2.20645	1.38731	3.35801	3.49448	5.0089	5.39024
Solyc00g098560.2.1					Y	Y	1.55404	1.00873	2.19398	2.88815	2.33375	2.16257	1.02606	1.44439	3.35648	2.59342
Solyc00g102000.1.1	Y	Y	Y				3.58105	2.67016	5.80185	1.83375	11.8809	11.6697	7.69543	6.61622	2.47863	1.67809
Solyc00g136560.2.1			Y			Y	1.41891	1.89878	1.07261	0.87103	0.763772	0.816063	1.02606	1.07164	0.981125	0.40681
Solyc00g145170.1.1		Y		Y		Y	0.405402	0.296685	0.58506	0.733499	0.254591	0.775259	0.233195	0.512524	3.35648	2.49171
Solyc00g156980.2.1			Y				8.85127	8.1885	13.6514	11.5068	17.3546	18.6878	10.9135	10.6232	11.1538	11.1873
Solyc00g206460.1.1			Y	Y	Y	Y	2.49998	3.44154	1.31639	1.65037	0.933499	0.734456	2.28531	2.09669	0.309829	0.711918
Solyc00g227860.1.1			Y		Y	Y	1.0135	0.890054	3.70538	3.75918	2.12159	2.6114	1.49245	1.39779	3.61467	2.54256
Solyc00g244290.1.1		Y	Y	Y			8.1756	8.1885	3.75414	4.90527	4.45534	3.71308	7.92863	8.66632	10.1727	9.76345
Solyc00g282510.1.1		Y	Y	Y		Y	1.75674	1.72077	1.17012	0.916873	0.975931	0.448834	2.33195	3.02855	3.97614	4.42406
Solyc00g316530.1.1			Y		Y		2.16214	1.95812	0.731325	0.825186	0.806204	0.816063	1.58573	1.91032	1.44587	1.01703
Solyc00g323130.2.1			Y	Y	Y	Y	0.945938	1.18674	5.07052	4.67605	3.22482	3.59068	1.25925	1.58417	2.58191	2.18661
Solyc01g005000.2.1			Y		Y	Y	94.9316	100.991	30.8619	31.8614	37.8916	36.6412	119.163	119.884	24.2183	23.7984
Solyc01g005010.2.1			Y		Y	Y	0.337835	0.652706	9.55599	9.7647	8.91067	8.03822	0.886141	1.30461	8.41702	11.3398
Solyc01g005060.2.1					Y		1.82431	1.06806	2.9253	2.79646	2.20645	1.95855	2.09875	1.39779	1.54915	1.37298
Solyc01g005130.2.1			Y		Y	Y	0.608103	0.296685	3.75414	4.17177	3.09752	4.03951	0.559668	0.792083	5.99003	6.71237
Solyc01g005280.2.1			Y		Y	Y	20.3377	19.8185	44.5133	45.6603	65.2176	63.8977	27.3771	24.3682	68.8853	70.6833
Solyc01g005300.2.1		Y		Y		Y	19.3242	20.8866	20.2333	20.6755	20.3673	18.443	22.5266	20.5941	52.7226	55.9364
Solyc01g006200.2.1			Y		Y	Y	0.337835	0.237348	1.17012	1.65037	1.14566	1.3057	0.513029	0.512524	1.60078	0.864472
Solyc01g006330.2.1						Y	2.49998	2.13613	1.75518	1.0544	1.23052	1.38731	1.44581	1.72394	1.18768	1.01703
Solyc01g006390.2.1			Y		Y	Y	19.662	20.5899	98.924	96.2717	85.5849	85.7274	35.2591	34.9914	119.594	125.908
Solyc01g006660.1.1			Y		Y	Y	237.025	242.273	7.94707	6.73902	5.55856	5.59003	135.953	137.403	5.57692	4.93257
Solyc01g006780.2.1			Y		Y	Y	2.56755	2.43281	6.43566	6.69318	5.51613	5.34521	1.44581	1.02505	5.78347	6.30556
Solyc01g006790.2.1			Y		Y	Y	7.63507	7.95115	20.5259	21.3173	17.0151	14.7707	7.60215	8.15379	25.0445	26.2901
Solyc01g006900.2.1						Y	203.985	201.33	378.144	370.004	407.388	403.053	201.201	202.167	429.062	417.336
Solyc01g006930.2.1			Y		Y	Y	3.51348	4.45027	21.7447	20.3546	20.7067	20.1159	4.99037	4.56612	31.1895	31.6295
Solyc01g007070.2.1		Y	Y				4.39185	5.10298	2.9253	3.16321	1.78213	1.50972	4.4307	4.7059	3.97614	3.71214
Solyc01g007270.1.1		Y	Y				6.68913	7.29844	3.80289	4.7219	3.94616	2.85622	8.11518	7.54808	6.7646	7.7294
Solyc01g007330.2.1	Y	Y	Y				9.66208	9.67192	7.45952	7.42668	44.4685	44.3122	7.32232	6.56963	8.36538	8.39046
Solyc01g007500.2.1	Y	Y	Y				2.83781	1.78011	2.29149	1.7879	7.00124	7.54858	1.63236	2.0501	2.27208	2.0849
Solyc01g007530.2.1	Y	Y	Y				1.14864	0.652706	1.02386	0.687655	2.37618	2.44819	0.139917	0.372745	0.929487	0.813621
Solyc01g007610.2.1	Y	Y			Y		9.45938	7.0611	4.14418	3.89671	10.6504	10.0376	5.68996	6.19688	4.64744	5.13598
Solyc01g007630.2.1					Y		136.215	144.723	66.0631	64.9146	109.092	108.292	84.1367	83.2619	99.61	100.33
Solyc01g007690.2.1	Y	Y	Y				1.41891	1.78011	1.21888	1.14609	15.3179	15.4236	1.58573	1.63076	1.23932	1.32213
Solyc01g007700.2.1	Y	Y	Y				2.63511	2.96685	4.97301	5.36371	127.974	125.633	3.03153	4.42634	2.89174	2.59342
Solyc01g007710.2.1	Y	Y	Y	Y			17.5674	19.2845	35.6887	37.9127	487.244	467.563	24.159	24.9273	16.2144	18.9675
Solyc01g007720.2.1	Y	Y	Y				3.78375	3.73823	2.77904	2.70478	8.18933	8.44625	3.54456	4.42634	2.06553	2.13575
Solyc01g007730.2.1	Y	Y	Y				29.5268	27.117	43.392	44.1933	491.996	478.417	28.2632	30.6583	25.4576	25.6799
Solyc01g008070.2.1						Y	10.2702	9.19722	14.6265	14.5324	12.6447	14.5667	10.074	10.8562	18.3316	20.6965
Solyc01g008420.2.1					Y	Y	0.540536	0.534032	1.65767	1.32947	1.06079	0.979275	0.699585	0.745489	0.929487	1.57639
Solyc01g008850.2.1				Y			1.89188	2.43281	1.99896	2.88815	1.78213	1.3465	1.81892	1.91032	1.34259	1.01703
Solyc01g008910.2.1			Y		Y		23.0403	22.7854	9.60474	8.20602	6.95881	6.03886	21.5472	18.9634	11.5669	12.1535
Solyc01g009080.2.1	Y		Y				2.70268	1.78011	2.43775	1.60453	0.848636	1.10168	2.51851	2.51603	1.70406	1.77979
Solyc01g009100.2.1						Y	249.998	247.02	176.249	174.114	210.589	209.402	235.76	244.194	116.341	121.738
Solyc01g009160.2.1	Y						2.02701	2.19547	3.21783	3.48412	1.65484	1.2649	1.72564	1.53757	1.85897	2.03405
Solyc01g009240.2.1						Y	1.82431	1.72077	2.43775	2.84231	2.54591	2.81542	1.49245	1.53757	3.56303	3.55959
Solyc01g009340.2.1			Y		Y	Y	2.29728	2.43281	10.6286	8.66445	6.49206	6.77332	2.42523	2.32965	6.24822	6.45811
Solyc01g010020.2.1			Y		Y	Y	2.90538	3.61955	7.16699	6.60149	7.25583	7.38537	2.93826	3.54108	8.31375	8.0345
Solyc01g010130.2.1			Y		Y	Y	125.134	130.779	41.2955	42.818	33.8181	40.6807	152.136	149.191	60.3134	62.2928
Solyc01g010150.2.1			Y		Y		314.524	310.688	108.626	103.102	95.4291	95.1121	334.122	332.255	180.785	169.386
Solyc01g010220.2.1					Y		3.91888	4.03491	1.46265	1.97128	2.97022	3.59068	4.47734	3.63426	2.27208	2.84767
Solyc01g010240.2.1		Y	Y	Y	Y	Y	0.202701	0.356022	4.04667	4.12593	4.37047	4.93718	0	0	2.27208	1.57639
Solyc01g010250.2.1		Y				Y	4.39185	2.43281	3.9004	4.58437	2.63077	3.18264	2.00548	1.77054	7.59081	7.11918
Solyc01g010960.1.1				Y			15.4728	10.384	21.8423	21.5465	17.3546	17.0149	25.7914	24.6943	10.3793	10.1703
Solyc01g011080.2.1				Y	Y		1.28377	0.949391	0.48755	0.595968	0.933499	0.775259	1.11934	1.11823	1.18768	2.03405
Solyc01g017490.1.1	Y	Y	Y	Y			0.608103	0.652706	1.02386	0.962717	7.29827	8.36464	0.839502	1.44439	0.619658	0.254256
Solyc01g020190.2.1					Y		0.810804	0.830717	2.09647	1.28362	1.78213	1.3465	1.39917	1.81713	1.49751	1.32213
Solyc01g034080.1.1						Y	0.608103	0.474695	1.02386	1.00856	1.06079	1.06088	1.49245	0.885269	1.60078	1.67809
Solyc01g044480.2.1						Y	3.17565	2.37348	3.31534	3.48412	3.47941	4.08031	2.47187	2.79559	6.14494	5.18683
Solyc01g056980.2.1		Y		Y			3.64862	3.61955	2.09647	2.61309	2.84293	2.44819	3.87104	4.19338	5.99003	4.93257
Solyc01g057460.2.1			Y			Y	2.36484	1.18674	2.24273	2.47556	3.77643	3.50907	2.70506	1.77054	3.87286	3.30533
Solyc01g057730.1.1				Y		Y	0.67567	0.77138	0.68257	1.0544	0.891067	1.10168	1.16597	0.792083	1.80734	2.03405
Solyc01g057980.2.1			Y		Y	Y	6.21616	4.74695	0.48755	0.779342	0.509181	0.571244	8.62821	8.15379	0.929487	0.813621
Solyc01g058030.1.1			Y		Y	Y	1.82431	1.72077	19.112	18.0166	20.2824	20.4016	2.51851	1.3512	12.7546	12.1535
Solyc01g058040.1.1		Y	Y	Y	Y	Y	0	0.0593369	2.97406	3.02568	3.05509	2.5706	0	0.232965	1.44587	0.864472
Solyc01g058100.2.1		Y	Y				1.35134	1.24608	2.389	1.7879	3.35211	3.22345	1.49245	1.81713	1.23932	1.42384
Solyc01g058260.2.1						Y	62.9724	64.7959	86.4427	88.2032	91.6951	92.3783	70.5181	72.1727	140.559	136.993
Solyc01g058270.2.1			Y		Y	Y	11.4864	11.1553	27.4003	25.6266	26.4774	27.0933	11.5198	10.8096	23.6503	23.1882
Solyc01g058500.2.1	Y	Y					137.837	140.391	119.109	132.947	280.389	274.523	233.755	243.216	120.11	111.263
Solyc01g060070.2.1			Y				24.0538	24.9808	12.53	12.7904	12.5598	10.7312	24.2989	23.7625	18.1766	16.425
Solyc01g065510.2.1			Y		Y		6.7567	6.76441	3.16908	3.34659	2.75807	3.30505	6.94921	7.54808	3.40812	3.8647
Solyc01g065540.2.1		Y	Y		Y		272.633	265.948	75.8628	71.9287	66.8725	67.7332	347.973	339.337	148.873	145.18
Solyc01g065550.2.1			Y		Y		28.8511	27.8884	13.0663	11.9194	11.202	11.9145	29.1494	29.9128	18.7963	20.0863
Solyc01g065590.1.1	Y	Y	Y				0.270268	0.237348	0.243775	0.183375	3.90372	4.32513	0.186556	0.186372	0.103276	0.254256
Solyc01g066570.2.1			Y		Y	Y	0.270268	0.296685	0.975101	1.10025	1.01836	0.938472	0.326473	0.232965	1.85897	1.9832
Solyc01g066740.2.1			Y		Y	Y	36.0132	34.4748	13.1151	11.736	11.9233	11.6697	30.7817	29.773	8.57194	7.47514
Solyc01g066880.2.1			Y		Y	Y	10.2702	13.9442	28.863	27.0936	31.8663	33.1729	10.5404	10.2971	44.7703	47.8002
Solyc01g067010.2.1			Y		Y		1.55404	1.72077	4.8755	3.71334	3.64913	3.79469	2.23867	1.95691	2.94338	3.61044
Solyc01g067280.2.1				Y			5.06752	5.99303	4.8755	5.4554	6.06774	5.10039	5.03701	5.77754	10.6891	10.0686
Solyc01g067510.2.1			Y		Y	Y	7.83777	7.0611	1.4139	1.00856	1.10323	1.06088	7.13577	7.78105	0.877849	0.762769
Solyc01g067540.1.1		Y	Y	Y	Y	Y	44.0537	44.5027	0	0.137531	0	0.0408031	78.3069	74.0364	13.7874	13.9333
Solyc01g067660.2.1		Y					36.8916	37.857	28.5217	26.6352	23.5921	21.9521	40.6226	41.3747	47.7653	48.1053
Solyc01g067910.2.1	Y						4.45942	4.21292	2.43775	2.88815	6.57693	6.61011	4.85045	4.23997	3.30484	3.9664
Solyc01g068080.2.1			Y				5.67563	4.09425	2.97406	2.65893	2.41861	2.40738	3.96431	4.79909	2.8401	3.35618
Solyc01g073640.2.1			Y		Y	Y	332.903	330.566	1041.51	1078.47	1033.51	1023.79	267.568	274.107	1010.66	1039.71
Solyc01g073660.2.1					Y		13.6485	12.2234	6.48442	5.63877	7.08611	6.44689	9.51435	10.7164	11.3604	10.933
Solyc01g073680.2.1		Y	Y		Y	Y	8.24317	8.1885	1.56016	1.23778	0.806204	0.816063	8.11518	7.31512	1.80734	1.83065
Solyc01g073700.2.1		Y	Y	Y	Y		0.540536	0.356022	2.43775	3.2549	3.01266	2.44819	0.373112	0.279559	0.722934	1.01703
Solyc01g074030.2.1		Y	Y	Y	Y	Y	1.35134	0.415359	6.14313	5.86799	6.06774	5.34521	0.93278	0.698896	1.96225	1.62724
Solyc01g079170.2.1					Y	Y	0.743237	0.474695	1.60892	1.87959	1.27295	1.14249	0.139917	0.279559	1.39423	1.16958
Solyc01g079260.2.1						Y	5.33779	5.63701	3.16908	2.56725	2.84293	3.63148	5.78323	5.82414	2.73682	2.74597
Solyc01g079360.2.1			Y			Y	1.68917	2.13613	3.3641	4.30931	5.30397	5.46762	1.679	1.3512	7.33262	6.00045
Solyc01g079530.2.1					Y		1.0135	1.06806	2.19398	2.15465	2.20645	1.71373	1.63236	1.16483	2.11716	2.03405
Solyc01g079570.2.1		Y		Y		Y	15.3377	17.267	13.1639	13.9365	8.91067	9.75195	11.9396	14.4905	4.80235	4.52576
Solyc01g079620.2.1			Y		Y	Y	4.79726	3.79756	1.02386	1.467	1.23052	1.42811	1.11934	2.09669	1.91061	2.23746
Solyc01g079880.2.1			Y			Y	96.3505	96.3632	52.2166	55.1958	39.3767	38.8854	99.2478	98.8239	40.1229	43.8338
Solyc01g079950.2.1		Y		Y		Y	5.13509	4.68762	3.31534	3.02568	2.50348	2.6114	3.77776	3.4013	1.13604	0.813621
Solyc01g079980.2.1		Y	Y		Y		15.7431	16.7924	40.0766	39.7465	48.4147	44.7202	13.1522	11.9744	21.2749	21.7135
Solyc01g079990.1.1				Y	Y		1.08107	0.712043	2.09647	1.74206	1.14566	0.979275	0.373112	0.465931	1.03276	0.661067
Solyc01g080380.2.1			Y		Y		6.28373	4.92497	2.73028	2.47556	2.07916	2.20337	4.33743	4.84568	3.5114	2.94937
Solyc01g080410.2.1					Y	Y	1.41891	2.01746	0.58506	0.825186	0.848636	1.18329	0.839502	0.931862	0.464744	0.762769
Solyc01g080480.2.1		Y	Y		Y	Y	6.28373	7.29844	0.39004	0.458437	0.169727	0.367228	4.94373	4.65931	0.671296	0.661067
Solyc01g080540.2.1			Y		Y		29.6619	29.8465	67.1844	62.8975	79.0504	76.9139	30.7351	29.0741	58.9708	57.0043
Solyc01g080770.2.1		Y	Y	Y	Y		4.99996	4.86563	14.529	13.5239	8.82581	11.3025	3.63784	4.56612	4.85399	4.47491
Solyc01g080870.2.1			Y		Y	Y	1.28377	1.78011	3.26659	4.40099	2.97022	3.34586	1.11934	0.978455	3.61467	3.35618
Solyc01g080960.2.1		Y	Y	Y	Y	Y	14.5269	14.2409	0	0	0	0	14.1316	15.2359	1.03276	0.711918
Solyc01g081020.1.1						Y	3.71618	2.7295	4.48546	5.82215	6.2799	5.59003	3.45129	3.68085	6.97115	6.81407
Solyc01g081190.2.1						Y	8.37831	8.30717	13.3589	12.8821	15.3603	16.3213	9.00132	7.50149	19.3643	18.6624
Solyc01g081250.2.1			Y		Y	Y	5.87833	5.16231	2.68153	2.5214	1.48511	1.63213	3.21809	3.77404	2.11716	2.18661
Solyc01g081420.1.1				Y			2.70268	2.61083	2.04771	2.33803	2.97022	2.77461	1.95884	2.7024	5.0089	4.0681
Solyc01g081540.2.1			Y				8.44587	8.24783	15.5041	16.2287	18.67	19.3407	7.36896	8.15379	16.1627	16.7809
Solyc01g081610.2.1						Y	53.513	53.2252	82.201	85.6818	80.7477	86.1762	60.8639	57.822	109.37	113.856
Solyc01g086780.1.1	Y			Y			0.945938	1.1274	0.877591	1.0544	1.7397	2.40738	0.93278	1.25801	2.47863	1.47469
Solyc01g086810.2.1					Y		2.77025	2.13613	5.50932	4.30931	3.39454	2.81542	1.86556	1.30461	4.5958	4.37321
Solyc01g087200.2.1					Y	Y	2.77025	1.83944	5.41181	4.03424	4.24318	4.36593	2.05212	2.65581	4.75071	4.62747
Solyc01g087240.2.1						Y	19.5269	19.6405	38.809	37.7752	37.7643	35.7435	19.635	22.9238	59.0224	60.0045
Solyc01g087570.2.1			Y		Y		6.28373	5.99303	17.7468	21.8674	17.4395	17.5453	6.94921	7.68786	12.5481	11.2381
Solyc01g087590.2.1			Y		Y	Y	17.2296	15.9616	5.16803	5.73046	4.20075	4.52915	17.3031	18.3111	5.11218	4.47491
Solyc01g087710.2.1				Y	Y		0.878371	0.712043	1.75518	2.42971	0.763772	1.59132	0.606307	0.465931	0.877849	0.711918
Solyc01g087770.2.1			Y		Y	Y	0.608103	0.356022	1.46265	2.24634	1.52754	1.50972	0.886141	0.60571	1.18768	2.33916
Solyc01g087810.2.1			Y		Y		2.63511	2.19547	5.94811	6.14305	6.44963	5.87565	1.25925	1.21142	4.80235	4.11895
Solyc01g087890.2.1			Y		Y	Y	8.78371	9.19722	28.3267	26.681	29.0233	29.011	11.1934	9.83114	27.4199	28.2225
Solyc01g088300.2.1	Y		Y				0.608103	0.890054	0.780081	0.595968	1.7397	1.83614	0.886141	0.419338	1.23932	1.22043
Solyc01g088400.2.1			Y		Y	Y	17.8377	17.0297	66.9894	62.3932	70.9035	70.6302	15.9039	13.9779	44.1506	46.3764
Solyc01g088430.2.1		Y	Y	Y			1.41891	1.00873	1.60892	1.92543	2.8005	3.06023	1.53909	1.81713	0.774573	0.508513
Solyc01g088660.2.1					Y		8.78371	7.83248	4.3392	3.94256	4.70993	4.36593	12.6858	10.7164	4.95726	4.78002
Solyc01g088780.2.1			Y				3.17565	2.55149	4.38795	4.90527	5.89802	6.5693	3.12481	3.02855	4.33761	4.67832
Solyc01g088790.2.1						Y	4.25672	4.45027	9.31221	8.16017	8.18933	8.69107	3.68448	4.33316	9.65634	8.44131
Solyc01g089960.2.1		Y	Y	Y	Y	Y	0.067567	0	1.90145	2.15465	1.56998	1.79534	0.186556	0.0931862	0.516382	1.01703
Solyc01g090340.2.1			Y		Y	Y	15.4728	16.555	42.1243	41.9011	39.6313	41.252	7.88199	9.78455	51.5349	53.2413
Solyc01g090410.2.1			Y		Y	Y	1.0135	0.415359	2.58402	2.47556	2.03673	2.48899	0.279834	0.372745	2.58191	2.64427
Solyc01g090710.2.1			Y		Y	Y	5.33779	4.80629	0.731325	0.87103	0.848636	0.856866	4.29079	4.00701	0.722934	1.01703
Solyc01g090730.2.1		Y	Y	Y	Y		1.48647	1.24608	4.63173	5.31787	4.70993	3.63148	1.25925	1.53757	1.54915	1.8815
Solyc01g090740.2.1		Y		Y		Y	11.6891	9.9686	7.60579	8.84783	6.49206	6.40609	11.6131	10.5766	30.26	27.002
Solyc01g090760.2.1						Y	4.99996	4.27226	9.40972	8.34355	7.3407	7.34456	6.15635	7.59467	11.9284	12.9162
Solyc01g090790.2.1			Y		Y	Y	1.75674	1.72077	6.72819	6.14305	5.30397	4.28433	2.14539	2.37625	5.88675	6.15301
Solyc01g090800.2.1			Y		Y	Y	5.40536	6.1117	2.09647	2.15465	1.90943	2.16257	5.92315	6.0571	2.27208	2.54256
Solyc01g090840.2.1			Y		Y	Y	0.945938	0.890054	2.14522	2.33803	2.29132	2.81542	0.46639	0.652303	3.20157	3.45789
Solyc01g090910.2.1			Y		Y		40.9456	41.1205	86.1501	81.8768	83.6755	84.7481	38.3372	41.7008	68.9886	71.2426
Solyc01g091010.2.1			Y		Y	Y	57.2968	56.2514	392.624	401.361	457.881	449.242	14.3182	13.2324	355.58	346.704
Solyc01g091030.2.1		Y			Y	Y	1.62161	1.72077	4.48546	4.63021	3.01266	2.36658	1.49245	1.67735	6.97115	8.33961
Solyc01g091040.2.1			Y	Y	Y	Y	9.66208	10.7993	4.72924	3.94256	1.867	2.52979	23.7392	23.4363	1.60078	1.77979
Solyc01g091050.2.1		Y	Y	Y	Y		1.08107	1.89878	0.780081	0.50428	0.72134	0.530441	1.39917	1.49098	1.96225	1.37298
Solyc01g091230.2.1			Y		Y	Y	106.891	108.112	285.314	280.747	277.504	279.583	139.171	135.12	237.587	229.899
Solyc01g091260.2.1	Y	Y	Y				49.9996	52.9879	33.446	35.2996	12.0506	11.6697	52.2357	54.7469	54.7881	54.3092
Solyc01g091270.2.1		Y		Y			20.6755	21.2426	17.0155	16.1828	16.506	16.3621	22.5266	21.8988	37.5926	37.6299
Solyc01g091320.2.1			Y		Y	Y	19.3917	18.4538	48.2675	47.0356	58.3861	57.4916	14.5047	14.537	45.6481	43.5287
Solyc01g091420.1.1		Y	Y	Y	Y	Y	11.4188	13.8255	0	0	0	0	24.159	24.9739	1.34259	1.67809
Solyc01g091470.2.1		Y	Y	Y	Y	Y	7.43237	7.17977	0.048755	0.0458437	0.0424318	0	12.1728	13.0461	0.774573	1.62724
Solyc01g091850.2.1		Y	Y	Y	Y	Y	2.09458	2.13613	4.8755	5.40955	4.70993	4.65156	1.81892	1.39779	11.0506	13.0179
Solyc01g091870.2.1			Y		Y	Y	0.608103	0.296685	2.48651	2.10881	3.43697	3.42746	1.21261	1.02505	2.32372	2.39001
Solyc01g093960.2.1			Y		Y	Y	10.7431	11.096	0.48755	0.595968	0.169727	0.367228	0.233195	0.279559	0.413105	0.152554
Solyc01g094180.2.1						Y	1.68917	1.89878	3.07157	2.934	3.05509	4.12112	3.07817	2.79559	4.44088	3.91555
Solyc01g094240.2.1			Y		Y	Y	0.472969	0.474695	2.48651	2.38387	1.82457	2.08096	0.979419	1.07164	2.22044	1.62724
Solyc01g094250.2.1			Y		Y	Y	0.540536	0.237348	2.43775	2.06297	1.99429	2.28498	0.559668	0.652303	1.70406	1.72894
Solyc01g094340.2.1		Y					2.09458	1.78011	2.24273	1.74206	1.31539	1.42811	1.44581	1.72394	3.35648	2.94937
Solyc01g094610.2.1			Y		Y		4.59455	5.04364	9.50723	9.99392	9.8866	10.364	4.47734	5.07865	7.90064	8.54302
Solyc01g094790.2.1	Y	Y	Y	Y	Y	Y	33.3781	31.6859	1.07261	1.467	0.72134	0.530441	39.2234	39.7905	3.82122	3.45789
Solyc01g094970.2.1		Y	Y		Y	Y	13.8512	13.7068	2.73028	2.5214	1.56998	1.42811	0.979419	1.07164	4.38924	3.61044
Solyc01g095030.2.1		Y		Y		Y	22.9052	19.4032	19.5508	20.1712	21.7675	20.524	16.93	16.2144	47.5588	47.0883
Solyc01g095150.2.1	Y			Y	Y		2.16214	2.01746	6.63068	5.7763	1.61241	0.856866	0.652946	0.931862	1.60078	2.28831
Solyc01g095270.2.1						Y	6.3513	5.99303	7.60579	7.01408	6.74665	7.54858	5.92315	5.54458	13.6841	14.3909
Solyc01g095320.2.1	Y	Y	Y				84.256	83.7244	88.1979	84.169	23.2526	23.5434	111.374	110.426	110.661	113.297
Solyc01g095390.2.1		Y	Y		Y		2.16214	2.37348	0.780081	0.916873	0.551613	0.367228	1.679	2.28306	0.826211	1.57639
Solyc01g095500.2.1			Y		Y	Y	0.270268	0.296685	1.46265	1.19194	1.7397	1.46891	0.233195	0.139779	0.722934	1.01703
Solyc01g095530.2.1			Y				6.28373	4.86563	7.89832	7.65589	11.8385	12.3225	7.83535	9.4118	10.9989	10.0177
Solyc01g095630.2.1			Y				1.82431	2.2548	1.02386	1.23778	1.01836	0.775259	2.14539	1.63076	0.981125	1.16958
Solyc01g095720.2.1					Y	Y	2.77025	2.37348	5.80185	5.08865	4.62506	4.40674	2.05212	1.72394	6.97115	7.8311
Solyc01g095960.2.1			Y		Y	Y	1.89188	2.67016	14.3827	11.6901	6.87395	8.07902	7.83535	6.33666	11.3604	12.9162
Solyc01g096040.2.1						Y	109.594	114.402	177.078	184.842	174.437	168.395	98.6415	101.154	237.536	241.9
Solyc01g096070.2.1			Y		Y	Y	64.7292	60.583	347.575	342.223	304.618	300.76	79.1464	76.1331	337.662	332.72
Solyc01g096120.2.1			Y		Y	Y	0.270268	0.237348	4.3392	4.67605	4.28561	4.52915	0.093278	0.0465931	4.02778	3.25448
Solyc01g096280.1.1						Y	18.108	19.6999	12.7738	13.9365	9.16526	10.976	16.5568	16.6803	6.24822	7.57684
Solyc01g096320.2.1		Y	Y	Y	Y	Y	0.135134	0.534032	0	0.0458437	0	0.122409	0.279834	0.0931862	4.54416	3.30533
Solyc01g096340.2.1		Y		Y		Y	1.48647	1.89878	0.926346	1.10025	1.23052	1.02008	1.02606	1.21142	0.56802	0.40681
Solyc01g096360.2.1			Y				33.6484	34.8308	23.0611	23.2886	17.2273	15.7908	35.7255	33.3141	19.7774	18.7133
Solyc01g096410.2.1			Y		Y	Y	26.689	28.3037	9.6535	8.57277	8.65608	8.03822	26.9573	24.7875	14.4587	12.306
Solyc01g096590.2.1		Y		Y		Y	51.8914	45.9268	63.5278	68.628	68.6971	33.6218	57.2727	51.4854	22.0495	21.5609
Solyc01g096740.2.1			Y		Y	Y	10.8783	12.6388	5.75309	5.7763	4.49777	4.89638	10.0274	8.89928	5.62856	4.52576
Solyc01g096750.1.1			Y		Y	Y	33.3105	29.9058	76.3504	75.8713	112.656	114.738	45.986	45.4283	68.5755	66.4118
Solyc01g096790.2.1		Y					1.14864	1.1274	1.60892	1.60453	1.82457	2.5706	0.326473	0.559117	1.13604	0.864472
Solyc01g096810.2.1		Y					74.5264	75.1206	59.3349	62.4849	50.2817	51.2079	78.9132	74.7819	119.594	119.297
Solyc01g096860.1.1			Y		Y	Y	2.70268	1.66143	6.77695	6.41811	6.44963	5.38601	1.679	1.67735	5.21546	4.78002
Solyc01g096880.2.1			Y		Y	Y	0.270268	0.593369	1.12137	1.60453	2.12159	1.38731	1.02606	1.07164	1.03276	1.01703
Solyc01g097100.1.1						Y	1.21621	1.83944	0.926346	1.7879	1.10323	1.14249	1.39917	1.77054	0.877849	0.610215
Solyc01g097220.1.1			Y		Y	Y	3.04051	3.91624	1.36514	1.19194	0.975931	0.856866	2.33195	2.98196	1.23932	0.915323
Solyc01g097280.2.1					Y	Y	3.91888	3.44154	1.12137	1.28362	1.90943	2.12176	2.23867	2.32965	1.49751	1.32213
Solyc01g097290.2.1			Y			Y	4.25672	3.61955	2.24273	2.01712	1.65484	1.71373	3.21809	2.98196	1.80734	1.37298
Solyc01g097410.2.1				Y		Y	0.945938	1.18674	1.07261	1.37531	1.65484	1.2649	1.0727	1.25801	2.78846	2.59342
Solyc01g097420.1.1				Y			1.28377	1.72077	1.12137	1.60453	1.52754	1.87694	1.44581	1.77054	2.42699	3.20363
Solyc01g098400.2.1		Y	Y	Y	Y		8.64857	7.47645	1.21888	1.467	1.10323	1.42811	10.2139	10.3903	4.5958	4.62747
Solyc01g098530.2.1					Y		0.67567	0.712043	1.60892	1.97128	1.06079	0.856866	0.652946	0.559117	1.44587	1.06788
Solyc01g098650.2.1			Y		Y	Y	5.67563	5.39966	1.31639	1.51284	1.40025	1.59132	5.22357	5.31161	2.22044	2.74597
Solyc01g098670.1.1			Y				3.17565	3.44154	5.50932	5.36371	6.61936	7.14055	2.7517	2.51603	5.21546	6.81407
Solyc01g098720.2.1		Y		Y		Y	2.43241	1.89878	1.56016	2.42971	2.29132	2.04016	0.699585	0.978455	0.619658	0.864472
Solyc01g098790.1.1		Y					1.95944	2.43281	2.09647	2.24634	1.78213	1.46891	2.33195	2.42284	3.9245	3.91555
Solyc01g098820.2.1			Y		Y		1.62161	2.01746	0.975101	0.641811	0.678908	1.10168	2.23867	1.72394	1.39423	1.57639
Solyc01g098940.2.1			Y		Y		6.1486	6.82375	17.7956	15.8619	14.4692	14.8115	6.48282	5.87073	12.6514	13.1196
Solyc01g099020.2.1			Y		Y	Y	0.202701	0.118674	3.65663	3.39243	3.39454	3.38666	0.186556	0.652303	2.78846	2.69512
Solyc01g099030.2.1						Y	23.1079	22.4294	17.2593	17.879	18.1184	18.443	21.6871	19.8487	11.2055	9.56004
Solyc01g099160.2.1					Y		6.21616	6.17104	16.723	14.945	10.3534	11.9961	7.32232	7.78105	12.135	12.6111
Solyc01g099200.2.1			Y		Y	Y	3.64862	3.38221	0.68257	0.825186	0.806204	0.775259	0.699585	0.698896	1.39423	1.37298
Solyc01g099370.2.1					Y		6.48643	6.17104	2.34024	3.07153	3.47941	3.10104	5.13029	6.33666	4.69907	5.64449
Solyc01g099600.2.1		Y	Y		Y		224.322	223.285	76.7892	80.9141	75.3588	77.0363	176.482	183.39	151.661	160.843
Solyc01g099780.2.1		Y		Y			30.9457	30.6179	24.67	23.747	22.3191	23.625	42.9545	41.1417	53.6004	66.2592
Solyc01g099800.2.1		Y		Y			11.7567	12.4608	7.50828	6.5098	7.12854	7.63019	9.37444	10.2039	18.5897	19.2726
Solyc01g099810.2.1		Y		Y			26.2836	24.4468	17.6006	18.9793	15.0633	15.0564	29.1494	29.54	43.4793	43.9355
Solyc01g099840.2.1		Y		Y		Y	92.837	94.9984	48.0725	47.9066	49.1784	52.2688	88.8006	89.3656	223.077	230.763
Solyc01g099910.2.1		Y	Y		Y	Y	49.8644	45.8081	10.9699	8.84783	11.7112	11.0985	17.5363	17.5656	5.06054	4.98343
Solyc01g099980.2.1		Y		Y			9.86478	8.8412	4.63173	4.90527	4.62506	4.97798	10.9135	8.15379	12.3415	10.8822
Solyc01g100020.2.1			Y				16.689	13.4101	8.28836	8.29771	6.95881	6.44689	12.0329	10.5766	9.08832	10.0177
Solyc01g100200.2.1					Y	Y	5.27022	4.3316	10.6286	10.7733	9.16526	9.30311	3.17145	3.07514	10.4309	11.1873
Solyc01g100230.2.1		Y		Y			17.2971	17.3264	18.4294	14.7158	14.8511	14.4443	14.6913	14.7234	33.255	34.2229
Solyc01g100490.2.1			Y		Y	Y	0.608103	0.474695	3.51036	3.16321	3.01266	2.97863	0.652946	0.698896	2.53027	2.23746
Solyc01g100620.1.1						Y	8.78371	7.59513	13.9927	15.541	12.6022	11.4657	7.22904	7.73445	21.7913	22.9339
Solyc01g100660.2.1						Y	6.62156	7.17977	11.2137	11.9652	10.6504	9.91516	7.36896	7.4083	16.0078	18.7133
Solyc01g100710.2.1		Y				Y	11.081	12.2827	12.8713	13.9823	12.0506	12.8938	14.5047	13.8381	24.6314	27.358
Solyc01g100760.2.1					Y	Y	27.4998	25.0402	12.2863	11.5526	17.8638	16.4437	25.2783	24.6477	10.1727	8.74642
Solyc01g100940.2.1		Y	Y		Y		0.270268	0.652706	1.36514	1.37531	1.82457	1.79534	0.559668	0.838676	0.671296	0.762769
Solyc01g102400.2.1					Y		5.74319	7.47645	3.21783	2.934	3.6067	3.99871	6.5761	5.07865	3.40812	3.50874
Solyc01g102610.2.1			Y				8.31074	8.48518	4.04667	4.40099	3.77643	3.42746	7.97527	7.68786	7.74573	5.54279
Solyc01g102710.2.1			Y		Y	Y	2.77025	2.31414	7.36201	6.5098	7.29827	6.44689	2.33195	2.09669	5.6802	6.10215
Solyc01g102720.2.1			Y		Y	Y	2.16214	2.07679	0.877591	0.733499	0.551613	0.897669	1.30589	1.53757	0.671296	0.610215
Solyc01g102960.2.1	Y	Y	Y		Y	Y	10.0675	8.95988	2.04771	2.33803	0.339454	0.489638	10.5404	9.27203	4.80235	3.91555
Solyc01g102980.2.1			Y		Y	Y	34.5267	34.7121	89.3192	86.3695	90.1675	90.9502	29.2426	28.2354	93.4651	87.0574
Solyc01g103120.2.1					Y	Y	2.09458	1.36475	0.877591	0.595968	1.10323	0.856866	1.16597	0.978455	0.929487	0.762769
Solyc01g103220.2.1						Y	131.756	119.505	89.4167	88.3408	96.9142	99.1924	112.26	108.981	53.3422	54.5634
Solyc01g103290.2.1						Y	0.608103	0.830717	0.780081	1.0544	1.44268	1.06088	0.886141	0.745489	1.70406	1.47469
Solyc01g103470.2.1			Y		Y	Y	0.67567	0.652706	1.4139	2.01712	1.56998	2.16257	0.373112	0.60571	1.49751	1.42384
Solyc01g103530.2.1			Y	Y	Y		1.41891	1.18674	5.50932	6.09721	3.43697	2.89702	1.30589	1.95691	2.06553	2.28831
Solyc01g103860.2.1			Y		Y	Y	1.82431	2.07679	0.780081	0.779342	1.01836	0.816063	1.16597	0.792083	0.56802	1.01703
Solyc01g104010.2.1						Y	7.29723	7.7138	4.53422	3.94256	5.26154	5.14119	8.81477	8.85269	3.20157	2.33916
Solyc01g104280.2.1						Y	13.3783	12.2234	8.09334	8.06849	9.16526	8.56866	11.5198	10.6698	6.0933	6.61067
Solyc01g104650.2.1		Y		Y			17.4323	18.0978	12.4813	11.5984	10.4382	12.1185	14.4114	16.4008	25.0445	24.5612
Solyc01g104660.2.1			Y		Y	Y	9.59451	10.562	22.7198	23.6553	22.3615	20.8912	10.727	9.13225	24.115	24.5103
Solyc01g104720.2.1			Y				2.02701	3.26353	1.46265	1.28362	1.10323	1.18329	2.61178	2.14328	2.06553	2.13575
Solyc01g104950.2.1			Y			Y	135.202	132.262	75.7166	72.9373	50.2392	51.5344	125.086	128.923	39.0901	37.3248
Solyc01g105220.2.1					Y	Y	0.608103	0.534032	1.02386	1.42115	1.01836	1.14249	0.559668	0.60571	1.65242	2.49171
Solyc01g105230.2.1			Y		Y	Y	21.689	22.6667	52.0216	54.6457	48.2025	50.147	20.7077	22.5045	52.6193	55.7839
Solyc01g105410.2.1		Y		Y		Y	234.93	242.332	194.874	209.506	150.76	149.38	218.27	219.733	488.755	493.919
Solyc01g105440.1.1				Y	Y		2.16214	1.78011	1.07261	0.87103	1.40025	1.22409	0.746224	1.58417	1.70406	2.74597
Solyc01g105450.2.1			Y		Y		34.3916	31.6266	13.4564	14.3032	14.7663	15.7092	34.9326	33.9198	16.6275	18.7641
Solyc01g105620.2.1			Y		Y	Y	3.37835	3.91624	0.438795	0	0.339454	0.122409	2.37859	2.37625	0.309829	0.254256
Solyc01g105650.2.1	Y	Y	Y		Y	Y	5.40536	4.27226	0.39004	0.183375	0.509181	0.775259	1.21261	1.44439	0.206553	0.152554
Solyc01g105680.2.1	Y				Y	Y	1.08107	1.00873	2.53526	3.02568	1.35782	1.10168	1.0727	0.978455	2.68518	2.13575
Solyc01g105800.2.1			Y		Y	Y	4.79726	2.84817	24.67	24.5264	26.8593	26.114	7.78871	7.82764	36.6115	34.0704
Solyc01g106340.2.1						Y	4.32429	4.74695	2.389	3.20906	3.13995	2.6522	3.35801	3.02855	1.80734	2.0849
Solyc01g106500.2.1						Y	1.08107	1.00873	1.51141	1.92543	2.16402	1.99935	1.0727	1.39779	2.37536	2.13575
Solyc01g106820.2.1		Y		Y		Y	7.90534	6.17104	6.33815	6.46396	5.55856	5.54923	9.18788	8.85269	13.7874	14.4926
Solyc01g106890.2.1			Y				1.75674	1.6021	1.26763	0.641811	0.763772	0.775259	1.44581	1.72394	1.29095	1.11873
Solyc01g106910.2.1		Y	Y	Y	Y		2.49998	2.31414	0.780081	0.779342	0.72134	0.489638	3.8244	4.47294	2.42699	1.57639
Solyc01g107090.2.1			Y				1.21621	2.07679	0.926346	1.14609	0.636477	0.856866	1.44581	1.02505	1.34259	1.62724
Solyc01g107170.2.1		Y	Y	Y	Y	Y	1.62161	1.95812	0.438795	0.50428	0.297022	0.204016	1.81892	1.67735	5.06054	4.37321
Solyc01g107370.2.1			Y		Y	Y	21.9593	21.1239	3.07157	3.16321	3.05509	2.12176	25.4649	24.275	3.20157	3.76299
Solyc01g107390.2.1			Y		Y	Y	12.4323	12.5201	4.63173	4.76774	4.28561	5.182	7.13577	6.29007	3.40812	4.0681
Solyc01g107430.2.1			Y		Y	Y	0.608103	0.593369	1.60892	1.23778	1.06079	1.50972	0.792863	0.931862	1.23932	1.42384
Solyc01g107590.2.1			Y		Y	Y	12.2296	10.6806	3.12032	2.79646	2.03673	2.89702	6.94921	6.47644	3.61467	3.8647
Solyc01g107650.2.1			Y		Y	Y	66.6886	67.5254	21.9398	23.2427	16.8878	17.3005	74.669	75.2013	24.5798	24.5612
Solyc01g107890.2.1					Y	Y	8.37831	8.95988	20.2333	19.4377	17.1	16.4029	8.30174	8.7595	22.5142	21.3575
Solyc01g107980.2.1			Y		Y		15.3377	14.7749	6.09438	5.36371	4.83722	4.48834	19.7749	20.5941	7.79736	8.89897
Solyc01g107990.2.1			Y		Y	Y	13.9864	13.3508	2.389	2.5214	3.18238	2.32578	19.3552	18.8236	3.61467	3.81385
Solyc01g108100.2.1		Y		Y		Y	2.49998	3.14486	2.34024	2.61309	2.20645	2.04016	2.47187	2.46943	5.06054	6.86492
Solyc01g108170.2.1			Y		Y	Y	0.540536	0.356022	3.16908	3.02568	5.04938	4.56995	1.35253	0.838676	2.99501	3.15278
Solyc01g108200.2.1			Y				5.81076	5.28099	2.53526	3.62165	2.24888	3.10104	3.40465	3.72745	3.20157	4.78002
Solyc01g108210.2.1			Y		Y	Y	1.68917	1.78011	9.94603	10.269	10.3958	11.3025	1.95884	1.95691	7.74573	9.8143
Solyc01g108280.2.1					Y	Y	7.90534	8.54452	19.7458	18.6584	15.8271	16.2804	6.52946	6.84918	23.2888	23.0356
Solyc01g108320.2.1	Y	Y	Y		Y	Y	9.39181	9.55325	1.36514	1.32947	0.424318	0.816063	2.37859	3.02855	2.1688	1.57639
Solyc01g108450.2.1						Y	1.35134	2.19547	3.60787	3.07153	2.33375	2.20337	1.95884	2.23647	3.71795	3.55959
Solyc01g108520.1.1			Y			Y	3.24321	3.08552	1.60892	1.65037	1.27295	1.02008	2.56514	2.42284	1.0844	0.915323
Solyc01g108610.2.1			Y		Y	Y	4.25672	3.91624	0.438795	0.137531	0.212159	0.244819	3.21809	2.84218	0.516382	0.457662
Solyc01g108630.2.1		Y	Y	Y	Y		0.472969	0.534032	1.90145	1.87959	1.69727	2.20337	0.513029	0.232965	0.516382	0.661067
Solyc01g108880.2.1		Y	Y	Y	Y		2.09458	1.89878	0.877591	1.0544	0.636477	1.10168	1.81892	1.3512	1.91061	2.44086
Solyc01g108910.2.1		Y		Y			10.0675	6.88308	6.19189	5.86799	4.41291	4.85557	7.4156	7.59467	13.9939	13.323
Solyc01g109270.2.1						Y	8.64857	7.89181	4.82675	5.7763	5.64343	5.10039	6.99585	6.61622	3.97614	3.8647
Solyc01g109610.2.1			Y		Y	Y	10.6756	10.3246	0.633815	0.87103	0.763772	0.775259	5.87651	4.93887	0.929487	0.610215
Solyc01g109680.2.1						Y	3.17565	2.55149	1.75518	2.38387	1.90943	1.99935	1.86556	1.72394	1.18768	1.42384
Solyc01g109710.2.1			Y		Y	Y	2.97295	2.84817	7.11823	6.92239	6.53449	6.16127	2.28531	1.77054	8.88177	7.32258
Solyc01g109970.2.1						Y	52.6347	49.5463	75.8141	76.5131	78.5412	80.1781	53.3084	51.0194	111.538	107.144
Solyc01g110000.2.1			Y				7.3648	6.70507	3.60787	4.40099	3.35211	2.97863	10.7736	8.52654	3.82122	3.81385
Solyc01g110140.2.1			Y		Y	Y	0.135134	0.118674	3.02281	2.97984	2.71563	3.38666	0.373112	0.279559	4.18269	3.81385
Solyc01g110200.1.1			Y		Y	Y	1.08107	1.66143	6.53317	6.96824	8.1469	9.1399	0.699585	0.652303	5.21546	5.54279
Solyc01g110340.2.1						Y	64.5265	59.7523	38.8578	39.288	30.8055	31.4184	66.787	65.0905	28.7108	26.0867
Solyc01g110360.2.1			Y		Y		7.22967	10.7993	3.07157	2.88815	3.47941	3.54987	4.71054	4.84568	4.80235	4.93257
Solyc01g110440.2.1		Y					16.2161	16.3177	11.5549	11.14	8.99554	8.28304	11.7064	12.6733	16.9373	18.7133
Solyc01g110580.2.1		Y	Y		Y		2.49998	2.67016	7.65454	7.33499	8.1469	7.38537	3.31137	3.4013	3.45976	4.11895
Solyc01g111350.2.1				Y			12.2296	12.4608	13.3589	13.0654	8.44392	9.62954	8.11518	7.54808	6.81624	6.35641
Solyc01g111600.2.1			Y		Y	Y	22.9728	21.4206	78.0081	77.2466	81.0447	80.1373	24.3922	23.0636	62.3789	60.9198
Solyc01g111610.2.1			Y		Y	Y	16.4863	15.0716	41.1005	42.0386	48.6268	48.1069	19.1686	17.8917	42.4466	39.4097
Solyc01g111880.2.1			Y		Y	Y	21.1485	21.836	8.38587	8.16017	7.93474	7.50778	27.517	25.4398	5.21546	5.7462
Solyc01g111980.2.1				Y			6.62156	7.12043	8.6784	9.4438	8.61365	7.38537	3.03153	3.3547	4.13105	4.22066
Solyc01g112000.2.1			Y		Y	Y	2.90538	2.49215	1.12137	1.23778	0.381886	1.22409	3.07817	2.74899	0.774573	1.06788
Solyc01g112140.2.1			Y		Y	Y	6.48643	6.64574	2.77904	3.02568	2.75807	2.85622	6.43618	5.59117	3.09829	3.25448
Solyc01g112190.2.1			Y		Y		3.24321	2.67016	7.75205	9.58133	8.78338	7.22215	4.15087	4.23997	5.16382	5.13598
Solyc01g112220.2.1						Y	4.18915	3.56022	5.36305	6.37227	6.23747	6.40609	4.15087	3.54108	8.98504	6.86492
Solyc02g011680.2.1						Y	4.93239	5.22165	3.85165	3.34659	3.64913	4.32513	4.38406	4.10019	2.42699	2.44086
Solyc02g011800.1.1	Y	Y	Y				0.743237	1.00873	0.828836	0.458437	2.71563	2.28498	0.373112	0.931862	1.13604	0.864472
Solyc02g014030.1.1			Y		Y	Y	6.28373	6.52706	14.4802	13.2947	14.1722	12.8122	6.80929	6.94237	14.8202	15.2554
Solyc02g014560.2.1						Y	0.810804	0.830717	1.31639	1.28362	1.10323	0.938472	0.979419	0.931862	1.85897	1.52554
Solyc02g014830.2.1			Y		Y	Y	0.270268	0.474695	2.389	1.467	1.56998	0.938472	0.279834	0.326152	1.13604	1.32213
Solyc02g020940.2.1			Y		Y	Y	4.72969	3.91624	1.02386	1.23778	0.806204	0.489638	1.81892	2.28306	0.877849	0.966174
Solyc02g021250.1.1			Y	Y	Y		2.09458	2.78884	0.828836	0.733499	1.27295	1.06088	1.81892	1.58417	1.65242	1.9832
Solyc02g021260.1.1			Y		Y	Y	173.377	178.07	373.854	360.056	392.961	391.261	155.728	153.664	362.242	367.248
Solyc02g021350.2.1			Y			Y	4.79726	5.39966	10.6286	9.53548	16.6757	14.6075	4.47734	3.72745	14.1489	14.2892
Solyc02g021680.2.1			Y			Y	6.7567	6.46773	4.24169	3.16321	2.63077	2.16257	2.51851	2.79559	2.1688	1.8815
Solyc02g031710.2.1		Y	Y	Y	Y	Y	11.4864	12.8168	1.51141	1.19194	0.678908	0.897669	13.5253	12.6733	2.53027	3.35618
Solyc02g031990.1.1	Y			Y			1.55404	0.77138	0.536305	0.687655	1.23052	1.3057	0.373112	0.698896	1.39423	1.16958
Solyc02g032410.2.1		Y					0.810804	0.890054	0.828836	1.00856	0.763772	0.693653	0.419751	1.07164	1.80734	1.42384
Solyc02g032480.1.1			Y				3.24321	2.43281	4.97301	4.85943	5.98288	5.54923	4.57062	3.63426	4.95726	5.7462
Solyc02g032800.1.1			Y				2.02701	2.96685	1.85269	1.55868	1.14566	1.10168	2.14539	2.23647	1.85897	2.0849
Solyc02g036350.2.1	Y	Y		Y		Y	1.35134	1.66143	1.80394	2.56725	0.72134	1.3057	0.513029	0.60571	0.671296	0.254256
Solyc02g036370.2.1		Y		Y		Y	31.1484	29.3124	36.7125	41.3968	33.7757	38.8446	30.0821	27.0706	87.9914	90.617
Solyc02g036440.2.1					Y		0.608103	0.652706	1.26763	1.28362	0.763772	1.2649	1.25925	0.792083	1.23932	1.27128
Solyc02g055370.2.1			Y		Y	Y	17.2971	15.0716	4.29044	4.90527	6.15261	6.28368	9.84083	11.0426	3.56303	3.30533
Solyc02g061990.2.1		Y		Y		Y	9.39181	9.90927	16.0404	15.2659	14.3844	15.3828	9.14124	9.13225	32.6353	32.9008
Solyc02g062490.2.1			Y		Y	Y	0.608103	0.296685	2.53526	3.2549	1.52754	1.95855	0.46639	0.419338	1.85897	2.23746
Solyc02g062760.2.1		Y	Y	Y	Y		19.5269	19.9372	2.29149	2.65893	1.56998	1.71373	32.5074	32.1492	11.412	12.5603
Solyc02g063150.2.1		Y	Y	Y	Y	Y	38.7159	39.3404	6.92321	6.5098	6.23747	6.40609	11.2866	9.83114	18.7447	17.6962
Solyc02g063390.2.1			Y		Y	Y	18.9863	19.2252	48.56	47.6316	55.4583	53.4113	15.111	14.537	44.667	42.9185
Solyc02g063440.2.1						Y	0.472969	0.949391	1.17012	1.23778	0.891067	1.02008	1.58573	1.25801	1.49751	1.83065
Solyc02g064640.2.1			Y		Y		8.24317	7.47645	15.4066	16.137	16.9727	16.4029	10.074	9.83114	14.8718	13.9841
Solyc02g064690.2.1			Y		Y	Y	0.270268	0.296685	4.63173	5.0428	4.49777	3.99871	0.513029	0.232965	7.90064	6.10215
Solyc02g064720.2.1			Y		Y	Y	0.878371	0.77138	3.9004	3.30074	3.18238	3.34586	0.186556	0.326152	2.11716	2.03405
Solyc02g064800.2.1			Y		Y	Y	15.2026	14.1222	37.8339	41.2135	40.1405	39.2934	19.4018	17.5656	42.4466	39.8674
Solyc02g064960.2.1			Y		Y	Y	0.67567	0.356022	92.4883	96.1342	97.7204	102.987	0.46639	0.559117	62.8437	62.4962
Solyc02g065020.1.1		Y	Y		Y	Y	9.45938	9.49391	0.877591	1.19194	1.40025	1.67293	4.75718	4.37975	0.929487	0.559364
Solyc02g065050.1.1			Y				5.81076	4.50961	3.70538	3.52996	2.37618	2.36658	4.75718	4.28656	2.53027	2.59342
Solyc02g065240.2.1			Y		Y	Y	1.41891	1.00873	4.77799	4.30931	7.42556	7.09974	1.58573	1.3512	4.5958	4.11895
Solyc02g065310.1.1			Y		Y	Y	1.28377	1.78011	3.9004	3.34659	4.62506	5.54923	1.02606	0.978455	3.66631	3.35618
Solyc02g065470.1.1						Y	7.83777	6.94242	4.24169	5.22618	3.64913	3.9171	6.29626	7.08215	3.2532	3.81385
Solyc02g065480.2.1			Y		Y	Y	0.945938	0.712043	2.24273	2.33803	1.82457	1.95855	2.00548	1.44439	2.11716	1.8815
Solyc02g065590.2.1			Y				1.48647	1.6021	0.926346	0.733499	0.933499	0.612047	0.886141	0.931862	0.826211	1.01703
Solyc02g065730.1.1		Y	Y	Y	Y	Y	9.18911	10.384	0	0.0458437	0.0848636	0	5.36348	5.73095	0.619658	0.559364
Solyc02g065780.1.1			Y		Y	Y	5.06752	5.22165	2.29149	2.33803	1.27295	1.22409	5.36348	4.47294	2.11716	1.67809
Solyc02g067090.2.1						Y	73.2426	76.3073	134.125	141.244	142.401	144.117	55.6403	54.6537	172.73	173.505
Solyc02g067310.2.1			Y			Y	69.7291	69.6616	39.3453	38.0961	29.4477	29.9087	68.4194	67.1872	32.5837	31.2227
Solyc02g067320.1.1				Y			8.85127	8.78187	12.53	12.3778	7.80745	8.44625	6.29626	6.33666	5.31873	4.72917
Solyc02g067340.2.1				Y			3.31078	2.96685	5.36305	5.40955	4.15831	4.24353	2.42523	2.0035	3.04665	1.8815
Solyc02g067680.1.1					Y		2.77025	3.38221	8.48338	7.74758	6.32234	5.63083	2.7517	2.65581	4.75071	4.93257
Solyc02g067690.2.1		Y					4.45942	4.03491	4.09542	4.67605	2.71563	2.6114	1.30589	1.3512	6.24822	6.45811
Solyc02g067870.2.1			Y		Y	Y	1.48647	1.42409	7.31325	6.41811	6.2799	7.05894	0.746224	1.21142	4.95726	5.9496
Solyc02g068030.1.1		Y		Y		Y	67.7021	71.7977	91.952	88.8909	86.3062	84.7889	69.9118	68.0259	182.386	182.505
Solyc02g068080.2.1		Y	Y	Y	Y		21.5539	20.4119	50.754	49.282	44.2139	47.0868	25.7447	27.3036	22.3077	21.6626
Solyc02g068120.2.1			Y				21.4187	22.1327	37.7852	39.288	46.4628	46.5972	23.7392	20.7805	38.9352	38.291
Solyc02g068250.2.1			Y				1.48647	0.712043	1.70643	1.42115	2.33375	2.04016	1.95884	1.02505	1.49751	1.06788
Solyc02g068670.1.1						Y	1.08107	1.18674	1.9502	1.51284	2.12159	2.24417	1.16597	1.21142	2.58191	2.59342
Solyc02g068800.1.1			Y			Y	1.55404	2.31414	3.55912	2.2005	4.83722	4.16192	2.70506	1.63076	3.76959	4.57662
Solyc02g068910.2.1					Y		34.6619	32.8727	73.8151	70.8285	67.7636	62.796	29.709	29.1673	61.1396	64.8862
Solyc02g069280.2.1			Y		Y	Y	4.45942	3.79756	1.21888	0.916873	0.891067	0.979275	7.83535	7.4083	1.44587	1.57639
Solyc02g069290.2.1		Y		Y			2.90538	2.01746	3.21783	2.79646	3.81886	2.52979	2.14539	2.14328	1.13604	1.67809
Solyc02g069390.1.1						Y	3.44592	3.44154	5.8506	4.81359	7.00124	5.87565	3.96431	4.79909	7.69409	7.57684
Solyc02g069430.2.1			Y		Y	Y	4.12159	4.50961	0.243775	0.275062	0.46675	0.530441	3.73112	3.44789	0.516382	0.610215
Solyc02g069470.2.1			Y		Y	Y	20.6755	21.2426	51.4366	54.0038	50.3665	53.0849	18.7955	18.9634	47.3522	47.1391
Solyc02g069490.2.1					Y		505.806	484.901	1133.65	1115.24	929.85	927.7	322.602	319.349	686.065	671.44
Solyc02g069510.1.1			Y		Y	Y	4.66212	6.76441	14.0414	15.8161	13.9601	13.7099	2.14539	2.0035	17.4537	18.6116
Solyc02g069580.2.1			Y			Y	47.3645	46.6388	94.4385	92.375	109.05	105.068	51.3495	48.6898	113.552	111.161
Solyc02g069800.1.1			Y		Y	Y	3.98645	3.91624	9.70225	11.0942	9.2077	10.364	4.52398	5.31161	9.34651	9.40749
Solyc02g069810.1.1			Y		Y	Y	13.7837	13.7068	39.2478	36.9958	36.7884	37.3757	14.8312	15.2825	43.5826	43.6304
Solyc02g069910.1.1			Y		Y	Y	11.8242	11.63	3.75414	4.76774	1.95186	2.5706	7.92863	8.99247	3.04665	3.40704
Solyc02g069930.1.1						Y	2.09458	2.13613	2.24273	1.83375	2.20645	1.3057	1.11934	1.44439	0.774573	1.27128
Solyc02g070280.2.1			Y		Y	Y	2.02701	2.07679	5.02177	5.82215	6.4072	6.77332	1.86556	1.81713	5.26709	6.00045
Solyc02g070330.2.1			Y				60.8103	70.4923	41.1005	50.7948	25.0348	33.6626	58.7651	85.312	42.9113	42.41
Solyc02g070890.2.1			Y			Y	15.2026	13.5882	8.87342	8.57277	5.77072	6.16127	11.8929	12.9063	5.78347	4.88172
Solyc02g070920.2.1	Y				Y		0.945938	0.652706	1.99896	1.467	0.806204	0.612047	0.419751	1.16483	0.981125	1.11873
Solyc02g070950.1.1			Y		Y	Y	4.86482	5.39966	1.60892	1.0544	1.90943	1.18329	1.95884	1.86372	2.42699	2.18661
Solyc02g070970.1.1			Y		Y	Y	5.94589	5.81502	2.63277	1.87959	2.50348	1.55052	2.37859	1.44439	2.47863	2.94937
Solyc02g070990.1.1		Y					2.43241	1.54276	2.68153	1.69622	1.35782	0.979275	1.25925	1.39779	3.71795	3.30533
Solyc02g071000.1.1			Y		Y	Y	9.18911	8.78187	1.99896	1.467	1.18809	1.2649	1.0727	1.16483	2.06553	2.13575
Solyc02g071060.2.1		Y	Y		Y		4.86482	4.21292	1.99896	2.47556	1.44268	1.55052	6.90257	6.0571	2.78846	3.25448
Solyc02g071200.2.1		Y					1.82431	1.1274	1.46265	1.19194	0.848636	0.775259	1.25925	1.49098	2.01389	1.62724
Solyc02g071490.2.1			Y		Y		2.83781	2.84817	0.975101	1.37531	1.23052	1.02008	5.08365	4.37975	1.54915	1.67809
Solyc02g071620.2.1					Y		0.945938	0.77138	1.9502	2.01712	1.35782	1.3465	0.699585	1.02505	0.929487	1.11873
Solyc02g071680.1.1						Y	1.95944	2.13613	3.02281	2.47556	4.11588	2.40738	1.86556	2.0035	4.33761	3.91555
Solyc02g071710.2.1		Y	Y	Y	Y		1.75674	1.89878	5.70434	5.63877	6.53449	6.97734	2.05212	1.95691	2.47863	1.8815
Solyc02g071740.2.1			Y		Y	Y	10.8107	10.6806	36.03	34.5203	30.2539	32.0713	13.6652	14.0245	30.6731	31.3752
Solyc02g071750.2.1		Y		Y			5.47293	6.40839	3.12032	4.17177	3.39454	3.50907	6.01643	5.73095	9.55306	7.88195
Solyc02g071820.2.1			Y		Y	Y	10.3377	10.562	25.7914	25.9475	23.1678	24.8899	6.06307	4.7525	25.0445	22.578
Solyc02g071880.2.1					Y		13.6485	11.6894	27.4491	27.4604	24.6104	25.4612	13.9917	14.6302	21.7397	23.239
Solyc02g071920.2.1			Y		Y	Y	2.97295	2.55149	10.8236	10.1315	12.0506	10.6904	2.05212	1.49098	10.9473	9.916
Solyc02g072000.2.1			Y		Y		1.75674	1.95812	4.09542	4.26346	5.04938	4.73316	1.72564	1.91032	3.82122	2.69512
Solyc02g072310.2.1						Y	59.5941	54.8867	31.7883	28.9732	32.7998	31.4592	60.3508	55.5856	26.2838	27.8665
Solyc02g072320.1.1					Y	Y	6.7567	8.60386	2.14522	3.16321	5.00695	4.48834	7.88199	7.31512	2.8401	3.30533
Solyc02g073570.1.1					Y		6.82426	6.46773	14.7728	14.2574	10.2261	10.3232	6.99585	5.91732	9.91453	9.56004
Solyc02g076730.2.1						Y	33.9862	30.6772	21.891	21.0422	17.2697	17.3005	26.3044	26.5581	15.2849	15.6622
Solyc02g076740.1.1			Y		Y		17.0269	14.5375	8.33711	7.2433	5.38884	5.67164	12.9656	13.8381	9.13996	9.40749
Solyc02g077050.2.1			Y	Y	Y	Y	2.36484	1.95812	11.5062	10.4524	8.65608	7.95661	1.95884	2.88877	5.37037	4.52576
Solyc02g077100.2.1					Y		1.41891	1.30541	3.31534	3.2549	2.37618	2.12176	0.979419	0.978455	2.89174	1.93235
Solyc02g077120.2.1			Y				2.63511	2.19547	1.51141	1.97128	1.01836	1.14249	2.14539	2.0501	1.7557	1.83065
Solyc02g077190.1.1			Y		Y		0.337835	0.712043	1.21888	1.23778	1.61241	1.59132	1.02606	0.885269	0.981125	0.915323
Solyc02g077390.1.1		Y	Y	Y	Y	Y	66.0805	63.5499	1.65767	1.83375	2.16402	1.71373	131.335	126.128	21.688	21.9678
Solyc02g077670.2.1		Y	Y	Y	Y		20.7431	18.6318	7.11823	8.20602	7.97717	7.99741	22.7598	24.6012	17.7635	18.815
Solyc02g077710.1.1		Y				Y	63.9859	62.8378	54.2644	55.5167	61.908	63.4489	47.152	46.034	33.0484	29.0361
Solyc02g077830.1.1			Y		Y	Y	5.47293	6.05237	0.243775	0.183375	0.0424318	0.122409	4.80382	5.4048	0	0.254256
Solyc02g077840.1.1		Y					73.8507	69.7802	47.5849	54.9666	39.2494	38.8446	87.6347	95.7488	83.2924	89.9051
Solyc02g077880.2.1		Y		Y			116.958	120.217	105.116	110.025	86.3062	82.0143	134.833	139.08	213.679	222.118
Solyc02g077920.2.1		Y	Y		Y	Y	12.2972	12.5794	4.14418	3.94256	2.63077	3.46827	9.56099	7.87423	5.6802	6.66152
Solyc02g077970.2.1		Y	Y	Y	Y		7.09453	6.28971	0.341285	0.458437	0.127295	0.285622	7.92863	8.47994	3.35648	3.30533
Solyc02g078150.2.1	Y		Y	Y	Y	Y	6.3513	7.29844	1.12137	1.10025	0.339454	0.448834	8.39502	9.31862	0.258191	0.203405
Solyc02g078400.2.1			Y		Y	Y	275.2	286.36	121.303	116.856	105.188	102.579	214.12	213.396	111.022	113.602
Solyc02g078450.2.1			Y		Y		3.17565	3.02618	1.21888	1.60453	1.31539	1.75453	1.39917	2.0035	2.37536	2.23746
Solyc02g078460.2.1		Y		Y		Y	7.9729	8.12916	7.75205	7.70174	8.31663	8.11982	11.1934	8.99247	15.8529	17.086
Solyc02g078500.2.1			Y				13.7837	12.8168	7.45952	5.95968	6.4072	6.5285	16.8367	17.1929	7.12607	7.7294
Solyc02g078720.2.1						Y	14.5269	14.7749	21.1109	19.942	18.7124	20.2792	17.443	18.1247	31.1378	31.1718
Solyc02g078860.2.1					Y		4.66212	4.56894	9.84852	8.84783	7.68015	6.97734	4.10423	4.42634	8.00392	9.76345
Solyc02g078950.2.1				Y			13.108	14.5375	19.3557	18.8418	13.2387	13.3018	14.7379	16.5871	8.41702	6.55982
Solyc02g079010.2.1			Y		Y	Y	7.22967	7.83248	3.70538	3.75918	3.13995	3.63148	8.02191	8.43335	3.20157	3.05108
Solyc02g079140.1.1			Y		Y	Y	2.22971	2.19547	7.2645	7.01408	5.81315	6.28368	2.05212	2.23647	8.5203	7.8311
Solyc02g079160.2.1			Y		Y	Y	0.743237	0.712043	2.82779	3.20906	1.65484	2.16257	0.699585	0.372745	1.39423	1.62724
Solyc02g079500.2.1			Y		Y	Y	39.6618	38.1536	12.3838	11.736	11.7112	12.445	28.1699	26.5581	17.0922	15.4079
Solyc02g079570.2.1			Y		Y	Y	2.43241	3.32287	11.75	12.5153	14.0025	12.2001	4.24415	4.33316	13.271	13.0688
Solyc02g079930.2.1		Y	Y		Y		49.8644	51.4451	21.3059	21.5007	11.4566	11.2617	59.6513	57.7754	34.4427	33.867
Solyc02g079980.2.1						Y	0.608103	0.712043	0.926346	1.28362	0.933499	1.10168	0.559668	0.559117	2.01389	1.37298
Solyc02g079990.2.1						Y	0.743237	1.36475	2.34024	1.69622	1.56998	1.38731	2.00548	2.23647	3.14993	2.69512
Solyc02g080040.2.1			Y		Y	Y	0.608103	0.652706	1.85269	2.33803	1.48511	1.79534	0.792863	0.652303	2.01389	1.93235
Solyc02g080210.2.1			Y		Y	Y	5.94589	4.68762	2.53526	2.56725	2.20645	2.5706	2.42523	2.60921	2.01389	1.77979
Solyc02g080290.2.1			Y			Y	2.16214	1.6021	2.63277	3.94256	3.98859	4.52915	2.56514	2.42284	4.85399	3.15278
Solyc02g080490.2.1						Y	23.4457	25.5742	20.8672	20.4004	16.6333	14.6891	21.6871	19.0566	12.3932	12.1535
Solyc02g080510.1.1					Y	Y	19.7971	20.8273	40.7592	43.6432	27.2836	28.2358	17.5829	19.1498	44.8736	47.8002
Solyc02g080520.2.1					Y		10.0675	10.9773	22.6223	21.8216	19.5611	21.136	9.42108	9.83114	19.8807	19.1201
Solyc02g080530.2.1			Y		Y	Y	57.9725	56.1921	158.21	155.318	128.314	128.326	49.8571	46.9658	220.805	212.508
Solyc02g080580.1.1		Y		Y			6.48643	6.76441	5.65558	6.41811	5.21911	6.03886	10.2139	9.73796	13.0128	11.4415
Solyc02g080640.2.1					Y	Y	80.3371	81.8256	41.1005	39.7465	42.4742	41.6192	70.285	71.567	29.537	27.7648
Solyc02g080670.2.1						Y	121.08	121.581	107.554	108.925	87.6216	82.7079	118.37	116.902	57.7831	58.9875
Solyc02g080900.2.1				Y			4.52699	4.62828	7.16699	5.86799	4.83722	5.34521	4.24415	5.07865	2.8401	3.25448
Solyc02g081050.2.1						Y	1.62161	1.6021	2.19398	1.92543	2.24888	2.52979	1.35253	1.11823	3.56303	3.61044
Solyc02g081120.2.1			Y		Y	Y	403.713	393.701	150.897	146.929	154.24	160.193	364.484	349.541	193.85	192.167
Solyc02g081150.1.1		Y					40.4726	38.8657	36.9563	40.6633	35.3032	34.1522	54.7542	58.0084	72.3451	71.4461
Solyc02g081190.2.1			Y		Y	Y	11.081	11.5114	2.19398	2.84231	1.65484	2.08096	6.90257	7.73445	2.8401	2.23746
Solyc02g081330.2.1			Y				24.9998	28.1257	15.3091	16.2287	12.4325	12.8122	25.7447	24.7875	16.7308	17.4928
Solyc02g081340.2.1		Y	Y	Y	Y	Y	1.28377	1.00873	2.34024	2.42971	3.39454	3.34586	0.559668	0.372745	0.309829	0.457662
Solyc02g081670.1.1			Y		Y	Y	62.567	59.0996	0.0975101	0	0.0424318	0.163213	2.23867	1.77054	0.154915	0.0508513
Solyc02g081690.1.1			Y		Y	Y	33.7159	32.8133	6.14313	6.23474	4.37047	5.2636	22.8065	24.2284	6.55805	8.64472
Solyc02g081730.2.1			Y				65.9454	65.9233	121.059	119.377	133.618	132.447	58.2987	60.8972	92.4323	91.4306
Solyc02g081970.2.1			Y		Y	Y	3.24321	2.43281	0.536305	0.320906	0.72134	0.65285	1.39917	0.978455	0.722934	0.559364
Solyc02g082120.2.1		Y	Y		Y		4.79726	4.68762	1.56016	1.97128	1.44268	1.02008	9.23452	8.1072	3.35648	3.30533
Solyc02g082170.1.1		Y	Y		Y		9.39181	9.67192	4.38795	4.08009	2.63077	2.52979	7.27568	6.1037	5.06054	5.69534
Solyc02g082270.2.1						Y	19.9323	19.8185	37.4926	37.7293	23.9315	26.522	22.0602	22.1317	47.5588	49.1223
Solyc02g082400.2.1		Y	Y	Y	Y	Y	22.9728	19.1658	1.31639	0.641811	0.933499	0.938472	14.8312	15.1428	2.01389	2.49171
Solyc02g082410.2.1			Y		Y	Y	5.67563	5.34032	1.56016	1.65037	1.40025	1.3465	3.68448	4.65931	0.981125	0.966174
Solyc02g082420.2.1		Y	Y				32.5673	35.6615	19.5995	21.5924	18.0759	15.9948	39.5032	41.8406	36.7147	37.4774
Solyc02g082850.2.1			Y		Y	Y	17.7701	16.733	6.63068	6.92239	5.26154	5.91645	12.8724	14.6768	6.86788	6.20386
Solyc02g082920.2.1			Y		Y	Y	0.878371	1.1274	4.97301	4.67605	5.04938	4.52915	1.77228	1.86372	9.19159	7.7294
Solyc02g082950.2.1			Y		Y	Y	1.14864	1.24608	2.58402	2.47556	2.37618	2.89702	1.39917	1.16483	2.47863	2.59342
Solyc02g083200.2.1				Y	Y		5.74319	8.01049	2.77904	3.30074	5.09181	4.40674	8.02191	8.7595	6.71296	7.22088
Solyc02g083250.2.1		Y	Y		Y	Y	284.862	290.87	54.2156	56.0668	49.6876	49.6982	228.764	228.26	104.412	101.652
Solyc02g083280.2.1			Y		Y	Y	10.4729	10.9773	1.99896	2.934	2.63077	2.40738	10.3539	8.43335	3.97614	4.42406
Solyc02g083520.2.1			Y			Y	36.1483	33.7627	67.7695	66.3816	84.3968	86.3394	30.5952	34.5721	89.4889	87.21
Solyc02g083550.1.1						Y	1.0135	0.890054	1.36514	1.10025	0.933499	1.22409	1.02606	0.419338	2.32372	1.9832
Solyc02g083720.2.1			Y		Y	Y	15.0674	16.7924	2.82779	3.43828	3.56427	3.8763	12.406	12.8597	3.09829	4.83087
Solyc02g083790.2.1		Y		Y		Y	4.05402	3.38221	3.02281	2.79646	2.24888	2.32578	1.81892	1.49098	1.23932	0.813621
Solyc02g083860.2.1			Y		Y	Y	96.0802	88.4714	37.9802	39.1963	30.0417	27.4605	80.6388	81.6777	40.8974	35.901
Solyc02g083880.2.1			Y		Y	Y	116.08	100.932	48.3162	45.156	36.6611	38.8446	110.441	98.7774	44.8219	38.7487
Solyc02g083950.2.1			Y	Y	Y	Y	19.5269	19.5219	2.34024	3.16321	4.6675	4.20272	16.79	16.7735	5.6802	6.40726
Solyc02g084210.1.1			Y			Y	2.22971	3.38221	1.46265	1.7879	1.31539	1.18329	2.33195	2.23647	1.29095	0.915323
Solyc02g084240.2.1		Y		Y		Y	338.173	335.135	292.286	289.503	270.842	276.115	268.081	273.828	899.175	887.813
Solyc02g084390.2.1			Y			Y	13.3107	13.5288	11.7987	11.0483	6.44963	6.77332	10.6803	10.2505	6.0933	6.40726
Solyc02g084420.2.1		Y	Y				3.64862	4.3316	2.04771	2.38387	1.48511	1.55052	3.68448	4.28656	3.76959	3.40704
Solyc02g084430.2.1		Y		Y	Y		3.71618	2.96685	1.80394	1.0544	1.78213	1.71373	3.73112	3.68085	3.45976	3.9664
Solyc02g084570.2.1						Y	6.7567	5.93369	4.97301	4.85943	3.6067	3.8763	8.02191	7.50149	2.42699	3.55959
Solyc02g084680.2.1			Y		Y	Y	41.6213	40.7051	8.48338	9.58133	11.7112	10.5272	37.4045	39.1848	7.33262	10.6788
Solyc02g084740.2.1					Y	Y	6.82426	7.7138	3.3641	3.07153	4.5402	4.16192	5.5034	5.91732	2.42699	2.69512
Solyc02g084780.2.1		Y	Y	Y	Y	Y	5.74319	5.34032	0.29253	0.137531	0.0848636	0.0408031	2.79834	2.65581	0.361467	0.711918
Solyc02g084790.2.1			Y		Y	Y	23.9187	22.1327	6.63068	6.32643	6.61936	6.24288	17.7695	15.7019	7.22934	6.15301
Solyc02g084800.2.1			Y		Y	Y	31.1484	33.4067	6.33815	6.28058	5.81315	5.91645	24.1124	24.3216	3.82122	3.61044
Solyc02g084850.2.1		Y	Y	Y	Y	Y	1.82431	1.78011	0.048755	0.0916873	0	0	3.07817	2.56262	96.5634	100.126
Solyc02g084910.2.1			Y		Y	Y	8.78371	8.1885	3.55912	2.29218	2.88536	2.5706	9.0946	7.96742	2.63355	2.74597
Solyc02g084950.2.1		Y	Y	Y	Y		1.0135	0.77138	2.48651	1.7879	2.97022	2.28498	0.233195	0.465931	0.619658	0.610215
Solyc02g084960.1.1			Y		Y	Y	15.3377	15.1903	5.41181	5.82215	4.58263	4.65156	18.8422	16.4008	4.38924	4.42406
Solyc02g085020.2.1		Y	Y	Y	Y		0.743237	0.712043	6.53317	5.95968	5.81315	6.81412	0.46639	0.372745	0.877849	1.16958
Solyc02g085150.2.1			Y		Y	Y	11.2837	8.8412	2.58402	2.38387	2.75807	2.52979	11.6131	11.2289	4.80235	4.78002
Solyc02g085160.1.1			Y				20.4052	21.5393	10.4823	11.736	8.18933	9.91516	18.9354	19.6157	11.6186	10.3228
Solyc02g085190.1.1			Y		Y	Y	13.5134	14.7749	4.8755	4.17177	4.6675	5.01878	19.0753	19.9418	5.21546	4.16981
Solyc02g085290.2.1		Y				Y	2.43241	2.78884	2.19398	2.70478	2.97022	2.85622	2.47187	1.49098	1.54915	1.06788
Solyc02g085310.2.1						Y	3.64862	4.03491	6.92321	5.13449	4.92209	5.91645	3.96431	4.00701	9.19159	7.67854
Solyc02g085460.1.1					Y		1.35134	1.48342	2.77904	2.97984	1.90943	2.20337	1.72564	1.81713	2.89174	2.79682
Solyc02g085590.2.1			Y		Y	Y	4.39185	4.80629	1.07261	1.467	1.06079	1.02008	3.17145	2.32965	1.23932	0.864472
Solyc02g085730.2.1			Y		Y	Y	25.5403	29.9058	113.843	113.28	112.572	117.472	23.0397	23.3897	167.772	164.758
Solyc02g085950.2.1		Y	Y	Y	Y		16.3512	14.8342	2.82779	3.89671	3.98859	4.44754	9.00132	8.43335	16.834	17.0352
Solyc02g086180.2.1			Y		Y	Y	178.242	176.231	371.27	365.695	385.917	355.681	115.105	115.364	394.257	386.012
Solyc02g086210.2.1			Y		Y	Y	6.62156	6.5864	2.97406	2.84231	2.58834	3.14184	2.42523	3.21492	2.73682	3.05108
Solyc02g086440.2.1			Y	Y	Y		2.36484	2.37348	0.975101	0.687655	0.891067	1.02008	2.7517	2.28306	1.91061	1.42384
Solyc02g086460.2.1			Y		Y	Y	11.0134	10.74	4.24169	4.08009	3.90372	3.38666	5.96979	5.35821	2.89174	2.18661
Solyc02g086650.2.1			Y		Y	Y	22.6349	18.5725	58.3598	56.5253	62.502	59.2461	17.1631	18.4509	42.0335	42.8676
Solyc02g086770.2.1			Y		Y	Y	0.67567	0.890054	3.02281	2.15465	2.07916	2.32578	0.559668	0.885269	1.65242	1.62724
Solyc02g086820.2.1			Y		Y	Y	7.02697	6.70507	0.633815	1.0544	1.31539	0.734456	1.53909	2.09669	1.18768	1.52554
Solyc02g086980.2.1	Y				Y		2.02701	1.78011	0.633815	0.916873	1.52754	2.36658	1.25925	1.25801	1.70406	1.42384
Solyc02g087010.2.1		Y	Y	Y	Y	Y	5.47293	5.69635	0.877591	0.87103	0.806204	1.2649	7.78871	7.73445	2.01389	2.59342
Solyc02g087210.2.1						Y	1.82431	1.89878	0.926346	1.23778	0.848636	1.06088	1.02606	1.16483	0.56802	1.27128
Solyc02g087330.2.1						Y	21.8917	21.658	11.1161	11.3234	14.3419	13.2202	19.2153	20.1282	10.1727	8.84812
Solyc02g087400.1.1			Y			Y	17.8377	18.0384	9.40972	10.7274	8.1469	8.36464	14.598	15.5621	8.46866	8.33961
Solyc02g087620.2.1			Y				62.6346	68.5935	36.1762	33.6493	31.3571	33.9482	58.0189	59.1266	45.958	40.5285
Solyc02g087810.2.1			Y		Y	Y	0.945938	1.06806	2.14522	2.56725	2.41861	2.12176	1.0727	1.3512	2.78846	3.61044
Solyc02g087960.2.1				Y			3.04051	3.26353	6.58193	4.85943	4.11588	3.54987	3.03153	2.65581	2.63355	2.59342
Solyc02g088190.2.1					Y		1.62161	1.78011	3.55912	3.62165	2.63077	2.89702	1.35253	1.30461	2.11716	2.18661
Solyc02g088560.2.1			Y	Y		Y	20.2701	20.4712	13.6027	13.5239	8.78338	8.03822	16.5568	15.0962	5.31873	6.61067
Solyc02g088580.1.1					Y		6.01346	6.5864	13.1639	13.7073	9.41986	9.71114	7.92863	8.1072	9.81125	10.8313
Solyc02g088820.2.1			Y		Y	Y	272.903	270.161	65.0392	66.1983	66.8301	65.2034	262.204	266.839	45.39	46.4781
Solyc02g088910.2.1			Y		Y		52.2968	53.2846	23.6462	20.4921	19.3065	20.6056	47.665	47.525	30.4149	34.0195
Solyc02g088950.1.1			Y		Y	Y	0.810804	0.652706	1.90145	1.7879	1.69727	1.83614	1.35253	1.25801	1.65242	1.8815
Solyc02g089120.2.1						Y	3.10808	2.96685	5.21679	5.59293	5.64343	6.16127	2.89162	2.42284	10.4309	10.0686
Solyc02g089160.2.1			Y		Y		28.1079	28.7191	11.5062	11.1859	10.6079	12.2817	28.8229	27.4433	17.6086	16.3741
Solyc02g089200.2.1			Y		Y	Y	22.162	18.9285	0.048755	0	0	0.0408031	0.419751	0.0931862	0	0
Solyc02g089210.2.1		Y	Y	Y	Y	Y	42.0267	40.9425	1.17012	1.32947	0.891067	0.897669	38.8503	38.4393	6.45477	8.79727
Solyc02g089250.2.1			Y		Y	Y	60.9454	65.152	21.6472	21.8216	18.5427	17.7086	80.6388	75.7604	20.552	21.3067
Solyc02g089290.2.1			Y		Y	Y	39.7294	35.7208	15.6016	18.2916	16.3787	16.6069	21.3607	21.526	17.4021	18.1539
Solyc02g089500.2.1						Y	2.43241	3.8569	3.70538	3.9884	4.24318	4.48834	4.10423	4.7059	6.60969	6.81407
Solyc02g089620.2.1			Y	Y	Y	Y	192.16	205.484	87.0277	91.0914	50.8757	50.2695	228.531	231.661	38.0573	39.308
Solyc02g089690.2.1			Y		Y	Y	20.135	16.3177	4.24169	4.03424	5.94045	5.59003	25.5115	25.3	5.88675	5.7462
Solyc02g089930.2.1				Y			4.93239	4.74695	4.29044	4.49268	5.17668	4.81477	3.87104	4.47294	8.62357	9.25493
Solyc02g089940.2.1		Y	Y	Y	Y	Y	0.337835	0.474695	2.53526	3.20906	2.07916	2.89702	0.46639	0.279559	1.13604	1.32213
Solyc02g090120.1.1			Y		Y	Y	7.29723	7.12043	2.58402	2.33803	2.46104	2.08096	6.20299	5.96392	1.13604	1.42384
Solyc02g090300.2.1			Y			Y	12.635	11.6894	6.72819	5.86799	5.00695	5.42682	8.44166	8.15379	3.5114	4.22066
Solyc02g090310.1.1					Y		4.12159	3.61955	8.2396	7.65589	7.12854	7.26296	3.8244	3.4013	6.0933	5.64449
Solyc02g090360.2.1	Y			Y	Y		5.27022	5.28099	20.7209	20.1712	7.3407	7.42617	5.31684	4.14679	4.85399	4.67832
Solyc02g090410.2.1						Y	3.31078	4.15359	1.9502	2.15465	1.99429	2.16257	4.33743	3.82063	1.65242	2.0849
Solyc02g090430.2.1					Y	Y	14.5269	16.3177	34.4698	32.1364	29.0233	28.5214	20.9409	20.3612	32.532	33.867
Solyc02g090540.2.1			Y		Y	Y	4.86482	5.28099	19.307	19.3919	21.0462	20.728	5.03701	5.12524	16.3177	18.9675
Solyc02g090720.2.1			Y				6.9594	6.05237	12.2375	11.3234	13.1963	13.669	4.57062	3.82063	8.05555	7.7294
Solyc02g090730.2.1					Y		6.28373	5.22165	2.77904	2.2005	3.18238	3.59068	5.92315	6.33666	2.68518	3.35618
Solyc02g091030.2.1					Y	Y	6.1486	4.9843	11.5062	10.9566	10.0563	10.2824	5.68996	4.65931	13.839	13.0179
Solyc02g091310.1.1			Y		Y	Y	2.09458	2.37348	18.4782	18.6584	24.4407	24.6043	0.46639	0.652303	19.6225	18.0014
Solyc02g091390.2.1		Y		Y		Y	4.45942	3.32287	5.65558	5.95968	5.00695	5.2228	3.45129	4.84568	14.407	16.2724
Solyc02g091500.1.1	Y		Y		Y	Y	6.08103	6.34905	40.1254	38.8754	13.9176	12.649	8.20846	9.13225	22.2044	21.1541
Solyc02g091670.1.1	Y						1.55404	1.06806	1.90145	1.37531	0.678908	0.897669	0.699585	0.792083	1.39423	0.813621
Solyc02g091690.2.1			Y		Y	Y	2.49998	1.48342	7.75205	7.88511	11.7536	11.3433	0.839502	0.838676	6.91951	7.17003
Solyc02g091750.2.1			Y		Y	Y	0.405402	0.296685	1.56016	1.32947	0.933499	1.14249	0.233195	0.326152	1.85897	1.93235
Solyc02g091760.1.1			Y		Y	Y	0.945938	0.296685	1.99896	2.79646	2.29132	2.85622	0.839502	0.745489	3.9245	2.84767
Solyc02g091770.1.1			Y		Y	Y	2.16214	1.6021	7.75205	8.57277	8.2742	7.50778	2.33195	1.58417	7.59081	7.88195
Solyc02g091830.2.1		Y				Y	1.41891	2.13613	2.58402	2.61309	1.69727	1.79534	1.63236	1.30461	3.71795	3.61044
Solyc02g091840.2.1						Y	263.511	261.083	395.501	402.324	333.302	337.972	229.557	229.89	535.333	536.278
Solyc02g092070.2.1					Y		125.066	124.252	249.284	255.303	247.42	248.287	146.68	149.843	232.94	239.103
Solyc02g092150.2.1		Y				Y	6.01346	5.63701	9.31221	9.07705	5.51613	6.69171	5.68996	5.49798	11.4637	13.2213
Solyc02g092240.2.1			Y		Y	Y	23.9863	25.7522	7.60579	6.96824	6.44963	6.73252	26.3044	27.5365	11.2055	11.9501
Solyc02g092370.1.1				Y	Y		3.98645	4.56894	10.9699	12.9279	8.10447	8.07902	3.17145	3.07514	5.93839	4.98343
Solyc02g092460.2.1			Y		Y	Y	4.72969	2.7295	1.85269	1.7879	1.65484	1.50972	3.54456	3.68085	1.60078	1.37298
Solyc02g092550.2.1		Y	Y	Y	Y		2.63511	2.13613	7.55703	7.56421	7.76502	8.48705	3.45129	3.07514	3.40812	3.45789
Solyc02g092600.2.1			Y				1.95944	1.6021	2.63277	2.42971	3.734	3.99871	1.9122	1.72394	2.89174	3.71214
Solyc02g092650.2.1					Y		1.41891	1.66143	3.16908	3.52996	2.71563	2.89702	3.12481	2.42284	2.89174	2.39001
Solyc02g092750.2.1		Y				Y	1.48647	0.830717	1.60892	1.65037	1.18809	1.3465	1.16597	1.49098	2.53027	2.59342
Solyc02g092790.2.1			Y		Y		36.2159	37.6196	112.429	116.076	110.45	112.372	20.148	20.1748	71.5189	74.7005
Solyc02g092820.2.1	Y		Y	Y		Y	26.9592	25.9896	21.5497	20.7213	9.2077	8.97669	32.0876	34.7119	10.5858	9.45834
Solyc02g092860.2.1		Y	Y	Y	Y		3.51348	3.79756	1.4139	0.962717	1.27295	0.979275	2.61178	2.65581	2.58191	2.74597
Solyc02g092880.2.1			Y		Y	Y	1.0135	1.48342	4.29044	4.49268	3.98859	3.9579	1.86556	1.72394	3.45976	3.00023
Solyc02g092930.1.1			Y		Y	Y	77.2291	71.0856	31.2032	34.2911	23.9315	25.3795	69.4455	70.0294	28.401	28.375
Solyc02g093040.2.1		Y	Y	Y	Y	Y	99.9991	90.4888	2.58402	3.07153	3.13995	3.22345	120.888	123.146	23.9085	21.5609
Solyc02g093050.2.1			Y		Y	Y	80.2696	79.5115	30.1306	29.0649	30.8479	30.8064	86.0023	83.8676	33.1517	30.3582
Solyc02g093140.2.1			Y		Y	Y	7.22967	5.99303	2.9253	2.70478	2.37618	2.69301	5.55004	4.51953	2.58191	2.64427
Solyc02g093150.2.1			Y		Y	Y	0.472969	0.356022	68.6471	70.5534	68.9516	63.5305	0.513029	0.465931	57.4216	55.5296
Solyc02g093180.2.1			Y		Y	Y	14.9999	16.2583	48.2187	49.4653	48.839	49.535	21.9203	20.4544	40.7425	44.444
Solyc02g093250.2.1			Y	Y	Y	Y	2.22971	2.55149	0.39004	0.595968	0.933499	0.489638	1.35253	1.07164	1.18768	1.11873
Solyc02g093270.2.1			Y		Y	Y	6.3513	5.04364	1.65767	1.74206	1.78213	1.14249	5.13029	4.89227	2.37536	1.42384
Solyc02g093410.2.1		Y					45.0672	44.8587	35.9812	37.8669	33.5635	33.6626	39.0835	37.6006	71.6221	71.1918
Solyc02g093500.2.1						Y	0.743237	0.830717	1.21888	1.19194	1.40025	1.14249	1.16597	1.02505	1.60078	2.0849
Solyc02g093610.2.1						Y	3.71618	2.43281	2.19398	2.06297	1.95186	2.28498	2.70506	3.4013	1.44587	1.27128
Solyc02g093850.2.1			Y			Y	8.91884	8.48518	17.4055	16.5037	16.9303	17.831	10.1673	10.3903	17.3504	18.0522
Solyc02g093890.1.1		Y	Y	Y		Y	17.4998	17.1484	8.38587	9.53548	7.08611	8.56866	19.0753	19.4759	38.109	38.9521
Solyc02g093930.2.1		Y		Y		Y	23.1755	25.5149	27.7904	26.8185	26.9442	26.4812	26.8174	25.533	58.4028	58.9875
Solyc02g093990.2.1			Y		Y	Y	0.472969	0.474695	2.43775	2.01712	2.54591	2.32578	0.326473	0.419338	2.8401	2.49171
Solyc02g094050.2.1			Y		Y	Y	0.472969	0.296685	1.56016	1.00856	1.52754	1.87694	1.02606	0.978455	1.7557	0.813621
Solyc02g094060.2.1					Y		1.0135	1.06806	2.389	1.83375	0.975931	1.2649	1.44581	1.02505	1.23932	1.77979
Solyc02g094330.2.1						Y	37.6348	40.0524	34.5186	33.3742	25.2893	24.4819	37.1713	37.6006	19.0028	18.5099
Solyc02g094380.1.1		Y				Y	1.41891	1.24608	1.75518	1.97128	1.48511	1.14249	0.839502	1.39779	2.89174	3.15278
Solyc02g094400.2.1			Y		Y	Y	50.2023	50.4957	10.5798	10.2231	8.74095	8.36464	57.4592	53.1627	14.7169	14.696
Solyc03g005180.1.1						Y	2.70268	3.73823	2.43775	1.92543	2.6732	2.16257	2.61178	2.88877	1.49751	1.42384
Solyc03g005960.2.1			Y	Y	Y	Y	0.743237	0.415359	9.36097	9.81055	5.09181	5.10039	0.326473	0.279559	3.20157	3.50874
Solyc03g006040.2.1			Y		Y	Y	8.91884	8.42584	32.0808	31.4946	29.6174	29.4599	10.2606	10.53	23.1339	23.1373
Solyc03g006320.1.1		Y	Y				13.3107	13.9442	7.75205	7.74758	6.78908	5.63083	14.4581	14.6302	13.6325	13.1705
Solyc03g006360.2.1	Y	Y	Y	Y	Y	Y	4.59455	4.15359	0.58506	0.412593	0.254591	0.0816063	5.17693	4.98546	1.29095	1.16958
Solyc03g006490.2.1			Y		Y	Y	97.6343	97.4906	32.0321	33.1908	29.0233	30.1127	117.763	124.543	47.8169	44.8508
Solyc03g006630.2.1						Y	2.22971	2.96685	4.77799	3.2549	4.03102	4.24353	2.00548	2.23647	5.37037	5.13598
Solyc03g006780.2.1						Y	8.64857	9.37524	6.58193	6.83071	5.98288	6.5285	7.97527	8.29357	4.95726	3.9664
Solyc03g006830.2.1		Y		Y			12.7026	13.5288	10.0923	10.6816	8.31663	9.87436	18.1892	18.4509	23.7536	19.7303
Solyc03g006840.2.1			Y		Y	Y	22.2971	24.6248	7.06948	6.83071	4.92209	4.85557	28.0767	29.7264	6.91951	6.91577
Solyc03g006980.2.1					Y		0.67567	0.830717	1.85269	1.87959	1.56998	1.14249	1.21261	1.02505	0.826211	1.22043
Solyc03g007060.2.1			Y		Y	Y	3.58105	3.61955	11.1161	9.67302	12.3052	12.0369	2.14539	2.51603	8.57194	7.78025
Solyc03g007230.2.1		Y		Y		Y	27.3646	28.8377	38.9553	41.6719	28.3869	29.0926	29.8956	30.798	131.316	126.62
Solyc03g007290.2.1			Y		Y	Y	1.35134	1.95812	10.4336	10.9108	13.5782	14.8523	1.63236	1.3512	15.4398	13.1705
Solyc03g007340.2.1		Y	Y	Y	Y		5.81076	5.22165	2.48651	2.24634	2.20645	2.5706	4.89709	4.89227	4.85399	5.39024
Solyc03g007690.1.1			Y			Y	48.1077	49.131	27.9366	32.0906	20.0702	19.7895	47.152	50.5069	18.5897	15.4079
Solyc03g007710.2.1			Y		Y	Y	20.2025	22.6074	7.55703	7.38083	8.48636	10.16	29.7557	30.3321	7.17771	6.76322
Solyc03g007720.2.1		Y			Y	Y	10.4729	10.0873	3.75414	4.12593	5.38884	5.75324	12.9656	12.4404	2.68518	2.54256
Solyc03g007760.2.1		Y		Y			10.7431	10.5026	18.4294	17.3289	17.0151	16.0764	6.24962	5.31161	5.37037	7.11918
Solyc03g007890.2.1	Y	Y	Y				163.039	165.135	86.5402	86.6904	38.0189	39.7014	221.862	210.647	172.936	167.097
Solyc03g013160.2.1			Y		Y	Y	1.35134	1.66143	3.46161	3.2549	4.70993	4.32513	2.23867	2.23647	4.95726	4.62747
Solyc03g020040.2.1		Y					2.16214	2.67016	2.19398	2.29218	3.81886	3.9579	1.25925	1.07164	1.65242	1.52554
Solyc03g020060.2.1		Y		Y		Y	0.810804	0.296685	0.975101	0.87103	0.891067	0.612047	0.606307	0.512524	3.66631	3.91555
Solyc03g020080.2.1		Y		Y		Y	2.77025	2.96685	4.48546	5.27202	4.62506	4.97798	4.38406	5.68436	18.125	18.5099
Solyc03g025140.1.1						Y	0.810804	0.890054	1.02386	1.00856	1.14566	1.55052	0.93278	1.16483	2.06553	1.67809
Solyc03g025170.1.1		Y	Y				185.134	184.36	105.701	112.409	81.6812	81.1982	183.058	191.451	163.228	174.928
Solyc03g025190.2.1		Y	Y	Y	Y		0.810804	1.18674	5.41181	6.05137	4.75236	4.56995	0.46639	0.652303	1.18768	1.47469
Solyc03g025210.2.1			Y			Y	2.09458	1.83944	1.02386	1.14609	1.01836	0.65285	2.33195	1.86372	1.03276	0.915323
Solyc03g025590.2.1				Y			3.31078	3.50088	6.09438	6.60149	4.41291	4.12112	4.4307	4.56612	2.78846	3.15278
Solyc03g025720.2.1			Y		Y		7.09453	6.46773	1.9502	2.84231	2.03673	2.48899	4.6639	3.82063	3.04665	4.57662
Solyc03g025800.2.1					Y		4.12159	3.20419	1.9502	1.467	2.07916	2.16257	3.07817	2.88877	1.96225	1.77979
Solyc03g026040.2.1			Y				229.998	226.964	127.153	126.712	103.618	98.5396	216.078	207.945	121.556	117.212
Solyc03g026080.2.1						Y	1.89188	1.42409	2.9253	2.65893	2.16402	2.28498	1.30589	0.931862	3.76959	3.9664
Solyc03g026180.1.1		Y					62.2292	63.9059	60.2125	63.8602	47.9903	48.0253	72.2904	76.0865	104.154	105.466
Solyc03g026210.2.1			Y		Y		12.2296	11.9861	6.24064	5.36371	4.79479	5.59003	8.95469	8.52654	7.74573	6.86492
Solyc03g026260.2.1			Y				12.4323	11.9267	7.2645	7.70174	5.85559	5.182	9.56099	9.08565	6.45477	6.20386
Solyc03g031830.1.1			Y		Y		1.75674	1.89878	0.633815	0.87103	0.424318	0.693653	1.30589	1.25801	1.23932	0.966174
Solyc03g033510.2.1			Y		Y	Y	9.12154	10.1466	4.24169	4.35515	4.15831	4.20272	9.98074	10.3903	3.20157	3.20363
Solyc03g033840.2.1						Y	0.743237	1.18674	1.9502	1.7879	1.65484	1.87694	0.746224	0.792083	2.22044	2.69512
Solyc03g033860.1.1		Y	Y				2.49998	2.43281	3.94916	3.62165	5.21911	5.83485	1.679	1.86372	2.1688	2.64427
Solyc03g034030.2.1			Y		Y		4.99996	4.68762	1.9502	1.32947	2.16402	1.59132	3.35801	3.68085	2.89174	3.61044
Solyc03g034050.2.1			Y		Y		17.9052	20.4712	6.48442	7.2433	7.97717	8.52785	14.5514	15.6553	10.7924	8.89897
Solyc03g034070.1.1					Y		0.743237	1.78011	2.77904	2.79646	1.99429	2.32578	0.93278	1.16483	2.58191	2.18661
Solyc03g034370.1.1			Y			Y	2.02701	2.19547	2.87655	2.84231	4.49777	4.32513	2.00548	2.65581	4.49252	4.88172
Solyc03g034390.1.1	Y				Y		2.97295	2.55149	0.68257	0.87103	1.99429	1.87694	1.86556	1.63076	1.39423	1.37298
Solyc03g034400.2.1			Y		Y	Y	2.49998	2.61083	6.19189	4.95112	5.601	5.30441	0.792863	0.885269	5.73184	4.83087
Solyc03g034420.1.1			Y		Y	Y	1.21621	1.1274	2.82779	3.48412	2.58834	3.30505	1.30589	1.81713	4.38924	3.9664
Solyc03g036470.1.1		Y		Y		Y	0.743237	1.1274	0.926346	0.87103	0.678908	0.612047	1.58573	1.49098	2.11716	1.83065
Solyc03g042560.1.1		Y				Y	2.77025	2.96685	3.21783	3.43828	1.95186	2.52979	4.19751	4.0536	6.19658	5.69534
Solyc03g043620.1.1	Y			Y	Y		7.63507	7.77314	2.04771	2.10881	4.5402	4.32513	4.29079	4.7059	4.80235	4.67832
Solyc03g044060.2.1			Y		Y	Y	9.25668	8.54452	4.48546	3.89671	2.63077	2.85622	7.32232	7.82764	3.5114	3.76299
Solyc03g044300.2.1			Y		Y	Y	0.878371	1.1274	7.31325	6.73902	8.35906	10.2824	0.279834	0.326152	5.37037	5.64449
Solyc03g044670.1.1			Y		Y	Y	1.89188	1.78011	0.926346	0.825186	1.10323	0.612047	1.21261	1.16483	0.619658	0.864472
Solyc03g044790.2.1		Y		Y			1.21621	1.18674	0.58506	0.733499	1.06079	1.14249	0.792863	1.44439	2.32372	2.18661
Solyc03g044820.2.1		Y	Y		Y	Y	3.64862	4.21292	0.438795	0.641811	0.424318	0.326425	2.9849	2.79559	0.981125	0.711918
Solyc03g044970.1.1		Y	Y	Y			1.35134	1.18674	1.85269	2.01712	2.33375	2.77461	1.53909	1.67735	0.671296	0.711918
Solyc03g045000.1.1		Y		Y		Y	2.77025	3.02618	3.55912	3.02568	3.26725	3.34586	3.5912	4.7525	8.57194	8.39046
Solyc03g045140.2.1			Y	Y		Y	2.63511	4.74695	1.85269	1.87959	0.975931	1.06088	2.79834	2.60921	0.774573	0.610215
Solyc03g051700.1.1			Y		Y	Y	0.67567	0.890054	2.73028	2.47556	1.69727	1.63213	1.58573	1.44439	2.99501	2.28831
Solyc03g058430.1.1			Y		Y	Y	1.35134	2.01746	7.80081	7.38083	8.52879	8.36464	2.65842	1.95691	5.42201	4.27151
Solyc03g058960.1.1			Y		Y	Y	1.95944	2.37348	1.02386	0.916873	1.14566	0.489638	1.77228	1.91032	0.722934	0.813621
Solyc03g058990.1.1		Y					61.2832	81.885	55.2395	90.7705	142.698	77.2811	67.8131	64.8576	48.1268	46.173
Solyc03g059190.2.1					Y		13.2431	13.3508	7.36201	5.91383	7.59529	6.89573	14.5047	12.3938	6.66132	6.76322
Solyc03g059260.2.1						Y	8.37831	7.59513	13.8464	14.2574	10.4806	10.16	6.3429	6.0571	17.2471	16.7809
Solyc03g059390.2.1			Y		Y	Y	5.13509	4.68762	12.6276	14.67	16.8878	16.158	4.6639	4.98546	10.3276	11.8992
Solyc03g060510.2.1			Y			Y	11.4188	10.9773	5.89936	6.32643	4.79479	5.30441	7.78871	7.73445	5.16382	5.03428
Solyc03g063080.1.1	Y	Y	Y				9.59451	10.0873	5.3143	6.83071	40.3951	40.8031	12.4526	11.1823	8.15883	9.50919
Solyc03g063100.1.1		Y	Y	Y	Y		4.32429	4.86563	0	0.229218	0.0848636	0.244819	10.3072	8.52654	2.78846	2.79682
Solyc03g063260.2.1		Y	Y	Y	Y		1.0135	1.78011	0.731325	0.458437	0.72134	0.571244	1.21261	1.3512	1.85897	1.57639
Solyc03g063270.2.1				Y	Y		1.95944	1.48342	0.731325	0.825186	1.31539	1.2649	0.93278	0.978455	1.91061	1.8815
Solyc03g063480.2.1					Y		14.3918	14.7156	6.8257	6.87655	8.18933	7.46697	13.3388	12.0676	8.72685	7.8311
Solyc03g063550.1.1			Y	Y	Y	Y	4.52699	4.15359	0.780081	0.458437	1.18809	0.734456	8.30174	8.0606	1.60078	1.72894
Solyc03g065250.2.1						Y	23.716	20.5899	15.2116	14.5324	15.8271	16.9741	19.3552	19.1498	8.98504	10.2211
Solyc03g078270.1.1				Y	Y		3.31078	3.32287	1.56016	1.65037	2.58834	2.52979	2.79834	2.98196	5.16382	4.98343
Solyc03g078330.1.1			Y		Y	Y	0.472969	0.237348	4.48546	2.97984	3.26725	3.38666	0.186556	0.232965	2.37536	1.8815
Solyc03g078440.2.1			Y		Y	Y	5.47293	4.86563	11.0186	9.94808	10.6079	12.0777	3.87104	4.14679	10.4825	11.3398
Solyc03g080180.2.1		Y	Y	Y	Y	Y	6.62156	5.99303	0.926346	0.641811	0.678908	0.856866	6.66938	5.4048	2.8401	2.89852
Solyc03g081240.2.1		Y	Y	Y		Y	7.90534	8.66319	5.60683	5.0428	3.56427	3.54987	8.81477	8.15379	21.2233	19.832
Solyc03g082420.2.1		Y	Y	Y	Y		5.27022	4.56894	1.60892	1.7879	1.82457	2.36658	6.10971	6.70941	6.19658	6.86492
Solyc03g082540.2.1						Y	42.5672	41.0612	56.5071	56.9378	44.8928	45.9035	38.2906	36.2494	85.8226	87.6676
Solyc03g082920.2.1						Y	394.861	389.547	249.236	249.665	269.569	268.525	405.666	395.249	189.564	192.116
Solyc03g083060.2.1	Y	Y	Y		Y	Y	3.71618	4.21292	1.21888	1.14609	0.636477	0.285622	6.76265	5.91732	1.39423	1.52554
Solyc03g083120.1.1			Y		Y	Y	0.608103	0.652706	2.9253	2.97984	2.37618	2.12176	1.02606	0.60571	4.28597	3.9664
Solyc03g083130.1.1			Y		Y	Y	27.4998	26.1083	79.2269	76.3756	71.2005	70.467	25.8846	26.0455	107.046	108.567
Solyc03g083160.1.1						Y	2.70268	2.13613	3.94916	3.9884	3.81886	3.9579	3.12481	3.4013	5.88675	4.16981
Solyc03g083180.1.1						Y	4.12159	3.08552	5.36305	5.95968	3.90372	4.56995	3.87104	3.58767	7.64245	8.44131
Solyc03g083320.2.1			Y				2.90538	2.55149	2.09647	1.19194	1.18809	1.38731	3.17145	2.46943	1.70406	1.52554
Solyc03g083350.2.1						Y	44.0537	46.6982	59.0423	60.6053	62.9263	62.1024	52.2823	48.7364	103.483	98.4481
Solyc03g083440.2.1						Y	272.16	279.655	523.239	532.612	488.432	488.291	324.094	325.36	649.918	647.693
Solyc03g083550.1.1						Y	2.36484	2.49215	1.60892	1.32947	1.18809	1.55052	1.77228	1.86372	1.18768	1.22043
Solyc03g083650.2.1					Y		1.68917	1.83944	3.70538	3.80503	3.22482	2.97863	1.72564	1.77054	3.5114	3.25448
Solyc03g083910.2.1			Y		Y	Y	35.7429	38.8657	108.577	103.057	96.1928	92.9903	44.0738	47.7579	74.927	76.2261
Solyc03g083960.2.1			Y		Y	Y	7.43237	6.94242	45.4884	46.0729	36.4489	36.7636	9.28116	8.34016	24.683	24.0018
Solyc03g093140.2.1			Y		Y	Y	33.5808	35.0088	5.07052	4.30931	3.39454	3.14184	26.3044	26.1853	5.42201	5.59364
Solyc03g093370.1.1			Y		Y	Y	2.49998	3.56022	0.39004	0.962717	0.678908	0.734456	3.54456	3.82063	0.981125	0.813621
Solyc03g093400.2.1		Y				Y	0.945938	0.415359	0.877591	0.87103	0.763772	0.856866	0.652946	0.512524	1.96225	1.32213
Solyc03g093620.1.1			Y		Y	Y	14.3918	13.7068	0.877591	1.10025	1.23052	1.3465	17.5363	14.9098	1.54915	1.57639
Solyc03g093800.1.1	Y	Y	Y				4.52699	4.3316	4.92426	3.89671	2.24888	1.87694	6.29626	6.89578	6.66132	6.61067
Solyc03g093820.1.1		Y		Y			1.41891	2.13613	0.926346	1.00856	1.27295	0.979275	1.72564	2.28306	2.11716	2.49171
Solyc03g095310.2.1			Y			Y	10.135	10.8587	7.16699	7.15161	5.3464	5.14119	9.65427	9.87774	4.85399	5.18683
Solyc03g095350.1.1		Y		Y			0.67567	1.00873	1.65767	1.37531	1.61241	1.50972	0.559668	0.745489	0.619658	0.40681
Solyc03g095730.2.1						Y	62.0941	59.8116	30.6669	32.9616	38.9524	38.1917	50.7899	52.1377	29.6403	29.6971
Solyc03g095780.1.1	Y		Y				19.9323	21.836	11.7012	12.011	6.15261	5.34521	21.3607	20.8271	10.3793	10.5771
Solyc03g095820.2.1						Y	1.21621	1.95812	1.70643	2.24634	2.24888	2.40738	1.11934	1.91032	3.35648	3.81385
Solyc03g095940.1.1	Y		Y		Y	Y	9.18911	8.8412	0.58506	0.366749	0.72134	1.22409	0.839502	0.372745	0.671296	0.813621
Solyc03g095970.2.1			Y		Y	Y	137.229	135.051	15.8454	15.3576	13.9176	12.9754	97.4755	95.0965	12.2899	11.8992
Solyc03g096030.2.1		Y	Y		Y	Y	3.04051	3.26353	0.19502	0.366749	0.0848636	0.204016	2.14539	2.28306	0.56802	0.40681
Solyc03g096190.1.1		Y	Y				2.16214	1.89878	0.975101	1.0544	0.678908	0.612047	2.37859	2.88877	1.85897	1.27128
Solyc03g096780.1.1			Y		Y	Y	14.9323	15.3683	2.43775	2.5214	1.82457	2.28498	10.4005	12.6267	2.06553	2.13575
Solyc03g096840.2.1		Y		Y			107.567	107.875	61.5776	67.7111	64.2417	63.5713	74.0161	78.7423	139.888	149.808
Solyc03g097150.2.1		Y		Y	Y		1.08107	1.00873	2.58402	2.38387	1.867	2.16257	1.16597	1.25801	1.13604	0.864472
Solyc03g097170.2.1			Y		Y	Y	13.6485	12.6981	6.19189	6.87655	6.83152	5.59003	12.406	13.279	4.23433	3.66129
Solyc03g097380.2.1						Y	83.1074	85.6232	118.28	119.01	124.028	125.266	108.202	109.54	175.26	180.064
Solyc03g097530.2.1			Y		Y	Y	26.2836	23.2601	6.33815	6.60149	7.46799	7.875	23.8792	24.3216	7.48753	7.67854
Solyc03g097540.1.1			Y		Y		2.22971	2.61083	1.21888	0.87103	1.01836	1.3057	2.51851	2.74899	1.44587	1.32213
Solyc03g097820.1.1			Y		Y		11.0134	10.6213	24.3288	23.9304	22.9556	23.1762	3.07817	2.56262	15.0783	14.1875
Solyc03g097840.2.1			Y		Y	Y	14.1215	16.7924	4.92426	4.67605	3.77643	4.32513	14.4581	13.512	3.56303	3.76299
Solyc03g097920.1.1					Y		4.66212	5.04364	11.75	12.3319	7.42556	7.58938	4.99037	5.82414	8.83013	8.39046
Solyc03g098020.2.1		Y					27.4998	27.473	16.7717	17.5581	14.5965	13.8323	30.362	30.4253	30.7247	30.4599
Solyc03g098070.2.1			Y		Y	Y	16.8242	19.1658	2.9253	3.07153	3.26725	1.79534	22.6665	22.9238	1.85897	2.49171
Solyc03g098240.2.1		Y		Y			50.8779	49.4277	34.7623	34.612	33.9879	34.8051	48.7377	47.9909	71.932	71.5986
Solyc03g098580.1.1				Y		Y	5.33779	4.86563	3.80289	4.63021	4.03102	3.34586	5.78323	5.91732	1.91061	2.23746
Solyc03g098700.1.1		Y				Y	1.68917	1.24608	2.73028	2.06297	1.61241	1.59132	3.96431	3.96041	3.9245	4.22066
Solyc03g098790.1.1				Y			54.3239	53.6406	40.1741	38.0044	43.3228	43.7818	59.3248	57.3095	79.8842	80.8535
Solyc03g111100.1.1		Y		Y		Y	2.02701	2.2548	3.07157	2.934	2.8005	1.95855	3.91767	3.77404	33.9263	36.3587
Solyc03g111140.2.1						Y	5.27022	4.86563	5.89936	7.47252	6.66179	6.24288	7.08913	4.19338	13.9423	11.4415
Solyc03g111400.1.1			Y		Y	Y	1.48647	1.78011	7.31325	7.9768	9.16526	8.44625	2.89162	3.07514	4.95726	7.01748
Solyc03g111610.2.1			Y		Y		3.58105	3.26353	1.36514	1.37531	1.44268	1.59132	1.72564	2.0501	2.1688	1.93235
Solyc03g111690.2.1			Y			Y	2.70268	3.56022	1.46265	2.06297	1.44268	1.46891	3.17145	3.02855	1.44587	1.42384
Solyc03g111700.2.1			Y		Y	Y	13.7837	15.7243	3.3641	2.5214	3.01266	3.38666	13.5253	12.8131	5.52528	4.72917
Solyc03g111710.2.1		Y					6.01346	6.88308	8.58089	10.0398	12.6022	11.5473	10.4005	8.7595	4.80235	5.69534
Solyc03g111820.2.1		Y	Y	Y	Y	Y	0.878371	0.237348	2.14522	2.24634	3.94616	4.24353	1.86556	2.0035	0.258191	0.203405
Solyc03g111930.2.1			Y	Y	Y	Y	0	0.118674	2.29149	2.29218	1.35782	1.95855	0.093278	0.279559	0.826211	0.966174
Solyc03g111940.2.1		Y	Y				3.10808	3.14486	2.04771	1.19194	1.40025	1.3057	2.56514	1.21142	2.47863	3.10193
Solyc03g112070.2.1					Y		87.4992	83.0124	177.566	172.326	158.907	161.132	86.562	89.0394	153.159	155.707
Solyc03g112160.2.1			Y	Y	Y		18.5809	17.8011	6.63068	6.37227	8.52879	7.7934	16.0438	15.2825	13.8907	15.3571
Solyc03g112200.1.1		Y		Y		Y	1.75674	1.66143	1.26763	1.32947	1.18809	1.50972	1.35253	1.53757	0.671296	0.508513
Solyc03g112280.2.1			Y		Y	Y	2.70268	2.84817	13.3589	13.7531	10.8201	11.8737	3.54456	3.44789	14.407	14.4926
Solyc03g112300.2.1				Y			1.48647	1.18674	0.926346	0.641811	1.06079	1.06088	0.839502	0.698896	2.01389	1.93235
Solyc03g112430.1.1			Y			Y	4.72969	5.75568	2.34024	3.16321	1.44268	1.75453	4.38406	5.17183	1.49751	2.28831
Solyc03g112590.2.1		Y					61.2832	61.4731	55.7758	56.6169	46.0809	43.9042	61.3303	61.5029	110.609	112.839
Solyc03g112920.1.1			Y		Y	Y	0.405402	0.356022	8.2396	6.41811	6.70422	5.75324	0.233195	0.232965	4.23433	4.67832
Solyc03g113040.2.1			Y		Y	Y	1.41891	1.48342	3.16908	3.02568	3.69156	3.22345	2.05212	1.95691	2.99501	4.16981
Solyc03g113060.2.1					Y		18.7161	17.3264	7.31325	9.94808	11.1596	9.71114	16.277	15.5621	13.0645	9.96685
Solyc03g113070.2.1			Y		Y	Y	1.08107	1.06806	3.3641	3.2549	2.92779	3.06023	1.21261	0.885269	2.27208	2.28831
Solyc03g113080.2.1			Y		Y		1.0135	1.24608	3.65663	4.21762	3.39454	2.97863	0.93278	1.16483	2.11716	2.44086
Solyc03g113220.2.1						Y	43.0402	42.1292	71.2311	71.1952	78.4988	78.2604	38.1507	41.561	99.4035	95.041
Solyc03g113280.2.1			Y				3.58105	3.20419	6.63068	6.60149	7.89231	7.63019	2.00548	2.37625	4.69907	5.54279
Solyc03g113350.2.1		Y	Y		Y	Y	6.28373	5.99303	0.48755	0.733499	0.339454	0.326425	5.41012	4.89227	0.826211	0.661067
Solyc03g113420.2.1			Y		Y	Y	3.98645	4.68762	0.68257	0.825186	0.72134	0.734456	6.52946	5.82414	0.877849	0.864472
Solyc03g113440.2.1			Y		Y	Y	0.67567	0.593369	4.14418	4.63021	3.52184	3.99871	0.326473	0.139779	3.35648	3.45789
Solyc03g113460.1.1		Y					8.85127	10.74	12.2863	14.3032	8.10447	9.0991	10.3072	11.3221	17.3504	20.3914
Solyc03g113490.2.1			Y		Y	Y	7.3648	7.65446	20.6721	19.5294	23.8042	25.4612	6.20299	6.29007	15.13	16.8318
Solyc03g113620.2.1		Y					2.49998	2.84817	3.60787	3.16321	2.24888	2.40738	2.33195	2.60921	4.75071	5.59364
Solyc03g113710.2.1						Y	11.8918	12.9355	6.87446	8.25186	9.84417	7.46697	7.50888	7.73445	5.06054	6.96663
Solyc03g113950.2.1			Y		Y	Y	2.29728	2.07679	8.92217	9.81055	8.2742	8.40544	1.58573	1.63076	6.04167	5.89875
Solyc03g113970.2.1					Y		1.62161	1.48342	3.41285	4.26346	2.41861	2.89702	1.30589	1.39779	2.53027	3.35618
Solyc03g113980.2.1			Y		Y	Y	0.405402	0.593369	1.31639	1.97128	1.56998	1.71373	0.513029	0.372745	1.44587	1.11873
Solyc03g114020.2.1			Y		Y	Y	10.135	8.8412	24.3288	25.7183	26.1804	27.8685	11.2866	11.4153	20.7069	21.8661
Solyc03g114180.2.1			Y		Y	Y	0.67567	0.474695	2.29149	1.74206	1.82457	2.08096	0.699585	0.326152	1.18768	1.57639
Solyc03g114290.2.1					Y		1.41891	1.6021	2.82779	3.30074	2.46104	2.08096	2.51851	2.46943	3.35648	2.59342
Solyc03g114390.1.1			Y		Y	Y	1.62161	1.42409	3.12032	4.17177	3.56427	3.38666	1.53909	1.63076	2.89174	3.8647
Solyc03g114460.2.1			Y		Y	Y	46.5536	48.6563	20.5746	22.4176	20.537	21.136	44.8667	46.2669	17.0406	18.0522
Solyc03g114560.2.1			Y		Y		3.37835	2.43281	1.02386	1.28362	1.44268	1.3057	0.792863	1.3512	2.37536	2.03405
Solyc03g114710.2.1			Y		Y	Y	43.9861	44.384	16.0892	14.9909	13.069	12.7714	38.2906	43.052	15.8529	15.052
Solyc03g114800.1.1		Y		Y			7.22967	7.65446	10.4336	9.35211	8.99554	9.1807	8.06854	8.15379	4.49252	4.42406
Solyc03g114830.2.1		Y	Y	Y	Y	Y	22.2295	20.5899	2.29149	2.70478	2.37618	2.40738	24.5787	26.6047	10.4309	10.7805
Solyc03g114840.2.1			Y		Y	Y	39.8645	34.8901	0.0975101	0	0	0.0816063	5.36348	4.79909	0.258191	0.0508513
Solyc03g114890.2.1		Y		Y		Y	16.689	14.3002	14.529	18.4292	20.4097	17.9942	5.17693	6.80259	6.60969	6.50896
Solyc03g114910.2.1			Y		Y	Y	9.86478	8.66319	2.04771	1.97128	1.69727	1.95855	7.13577	5.59117	2.06553	2.33916
Solyc03g115180.1.1				Y		Y	0.810804	1.48342	1.02386	1.00856	1.82457	1.38731	0.746224	1.44439	2.63355	2.39001
Solyc03g115220.2.1			Y		Y		80.7425	84.0211	38.4677	39.6548	41.5407	39.4566	85.4893	89.3656	48.7981	48.8172
Solyc03g115230.2.1		Y	Y	Y			205.944	210.409	131.931	128.5	63.9447	69.0797	233.615	236.879	262.012	260.308
Solyc03g115380.1.1					Y	Y	10.2026	9.79059	23.4024	22.5092	19.8581	17.5045	7.13577	5.03205	22.2044	20.1371
Solyc03g115560.2.1				Y			3.17565	3.44154	3.31534	3.9884	2.29132	2.08096	4.29079	4.19338	1.60078	1.9832
Solyc03g115780.1.1			Y		Y	Y	12.2972	10.2653	23.5487	22.6926	24.7802	26.0732	11.4266	9.78455	22.979	24.0018
Solyc03g115890.2.1			Y		Y	Y	4.45942	4.21292	1.46265	2.2005	1.56998	1.38731	2.79834	2.37625	1.39423	0.813621
Solyc03g115910.1.1		Y	Y	Y	Y	Y	3.78375	4.03491	0.243775	0.183375	0.381886	0.122409	2.9849	2.18988	0.464744	0.661067
Solyc03g115920.2.1			Y		Y	Y	0.337835	0.118674	2.09647	2.15465	1.7397	1.83614	0.186556	0.186372	2.42699	2.69512
Solyc03g116160.1.1			Y		Y	Y	1.21621	1.18674	4.3392	3.34659	2.63077	2.81542	1.49245	2.65581	2.53027	2.33916
Solyc03g116240.2.1			Y		Y	Y	5.87833	5.28099	28.2292	25.1223	30.2114	31.6224	7.4156	7.31512	32.687	34.7314
Solyc03g116320.2.1			Y	Y	Y		1.0135	0.949391	3.85165	3.9884	2.75807	2.6522	1.25925	1.25801	1.65242	1.06788
Solyc03g116360.1.1			Y		Y	Y	2.77025	3.44154	23.3537	25.0765	21.9797	21.5849	2.61178	3.26152	20.3454	18.2048
Solyc03g116390.2.1		Y	Y	Y	Y		18.9188	17.8604	0.926346	0.779342	0.72134	1.06088	14.4581	15.2825	30.5698	33.2567
Solyc03g116410.1.1					Y	Y	5.94589	5.63701	11.4087	11.7818	11.1596	10.6904	5.45676	6.0571	13.4259	12.1535
Solyc03g116530.2.1			Y			Y	1.89188	1.95812	1.4139	0.779342	0.594045	0.856866	1.95884	2.37625	0.774573	0.966174
Solyc03g116590.2.1						Y	262.633	270.932	424.949	427.446	440.484	437.614	250.405	251.23	540.342	545.431
Solyc03g116630.2.1		Y	Y		Y		3.58105	3.32287	1.12137	1.51284	0.72134	0.856866	3.17145	2.88877	2.99501	2.23746
Solyc03g116650.1.1			Y		Y	Y	0.608103	0.652706	4.09542	4.30931	4.70993	5.14119	0.886141	0.792083	5.99003	6.10215
Solyc03g116670.2.1		Y				Y	35.8105	39.1624	40.7592	40.9384	34.7516	35.2947	38.8503	38.2995	78.9548	81.6163
Solyc03g116680.2.1		Y		Y		Y	39.6618	35.7208	39.1015	37.7752	33.3938	33.9482	28.9162	28.282	150.938	147.164
Solyc03g116730.2.1			Y		Y	Y	139.12	137.187	49.4376	47.494	44.2563	45.5771	151.996	147.048	57.1118	55.377
Solyc03g116900.2.1					Y	Y	26.689	24.0908	10.7749	9.94808	14.7663	15.2196	19.3552	18.3111	12.3932	11.0347
Solyc03g116940.1.1		Y				Y	2.97295	3.14486	3.75414	3.2549	3.13995	2.97863	2.79834	3.3547	6.55805	6.61067
Solyc03g116970.1.1		Y				Y	2.36484	2.19547	3.21783	2.97984	2.75807	3.22345	3.31137	3.3547	6.24822	6.00045
Solyc03g117190.1.1			Y		Y		3.71618	4.03491	1.26763	1.467	1.01836	1.02008	2.79834	3.07514	2.01389	2.03405
Solyc03g117230.1.1			Y		Y	Y	68.3778	67.1694	17.9906	18.1083	24.1437	23.3802	66.0874	70.4022	30.1051	32.2906
Solyc03g117330.2.1			Y		Y	Y	2.16214	1.95812	0.975101	0.825186	0.763772	0.938472	1.86556	2.28306	0.56802	0.711918
Solyc03g117390.1.1	Y						1.48647	0.949391	0.926346	0.50428	1.867	2.32578	1.16597	1.16483	1.18768	1.57639
Solyc03g117420.2.1						Y	87.5668	88.2934	112.332	108.65	113.42	113.188	73.1766	73.9898	203.248	196.693
Solyc03g117630.1.1		Y	Y	Y	Y		50.9455	50.3771	15.8454	14.8075	11.8809	11.7921	59.8845	59.2664	30.5182	33.511
Solyc03g117680.2.1		Y		Y		Y	16.8242	17.6231	9.31221	9.12289	9.12283	8.69107	19.0753	20.2214	35.7853	37.274
Solyc03g117730.2.1			Y		Y		21.4863	19.9965	43.0507	45.9812	49.0087	46.4748	24.9519	24.9739	33.7714	33.9178
Solyc03g117790.1.1				Y	Y		0.608103	0.949391	2.09647	1.55868	0.891067	0.979275	0.93278	1.53757	0.877849	0.813621
Solyc03g117840.2.1				Y	Y		3.51348	2.61083	1.46265	1.32947	1.95186	2.6114	4.05759	3.82063	2.73682	3.15278
Solyc03g117890.2.1			Y		Y	Y	16.8242	13.9442	7.36201	6.41811	6.2799	7.18135	11.5198	11.6017	7.17771	7.17003
Solyc03g117920.1.1						Y	1.14864	0.712043	1.12137	1.97128	1.44268	1.3057	1.0727	0.838676	2.1688	2.13575
Solyc03g117980.2.1			Y			Y	11.4864	10.918	5.16803	6.1889	5.89802	4.85557	9.74755	10.6232	5.52528	5.08513
Solyc03g118370.2.1					Y		13.3783	11.6894	6.14313	5.91383	6.53449	6.85493	14.6446	14.2109	9.65634	10.9839
Solyc03g118410.2.1						Y	18.4458	19.6405	17.5031	17.3289	14.8087	15.0564	10.8669	12.7199	8.5203	9.00068
Solyc03g118540.2.1			Y		Y	Y	54.5266	55.124	21.1597	20.1254	22.2767	21.136	50.0903	49.4819	25.1994	26.5444
Solyc03g118770.2.1			Y				2.77025	2.7295	4.82675	5.22618	6.02531	6.07967	1.11934	1.21142	4.38924	4.32236
Solyc03g118870.2.1			Y				2.16214	1.18674	1.26763	1.32947	0.636477	0.693653	1.44581	0.838676	1.13604	0.661067
Solyc03g118890.2.1		Y	Y				13.6485	15.0716	20.9159	21.5924	28.896	29.5415	12.2661	13.8847	12.2899	13.8315
Solyc03g119060.2.1			Y		Y	Y	0.472969	0.356022	1.02386	1.97128	0.891067	1.38731	1.0727	1.07164	1.65242	1.72894
Solyc03g119210.1.1			Y		Y	Y	1.41891	0.77138	2.9253	3.48412	3.81886	3.9579	0.93278	1.25801	5.88675	5.49194
Solyc03g119480.2.1						Y	5.54049	6.05237	10.5798	10.865	9.03797	10.4048	6.71601	6.29007	13.0128	11.5432
Solyc03g119590.1.1		Y					9.18911	11.1553	9.26346	8.80199	8.48636	8.16063	13.5719	13.0927	17.0406	16.3233
Solyc03g119820.1.1				Y			1.89188	1.66143	1.21888	1.23778	1.7397	2.48899	1.49245	1.25801	2.94338	2.49171
Solyc03g120320.1.1			Y		Y	Y	1.0135	0.712043	1.80394	1.7879	2.03673	2.24417	1.02606	1.16483	2.27208	2.84767
Solyc03g120360.1.1			Y		Y	Y	14.4593	13.4101	43.977	41.4885	39.1645	40.9255	12.8724	11.7415	47.4038	45.5119
Solyc03g120410.1.1			Y		Y	Y	1.48647	1.95812	6.09438	5.91383	5.55856	5.67164	1.63236	1.30461	4.13105	4.78002
Solyc03g120520.1.1						Y	1.0135	0.890054	1.75518	1.51284	1.40025	1.95855	1.11934	0.978455	2.06553	2.59342
Solyc03g120550.2.1					Y	Y	9.52694	10.0873	22.2811	23.1052	17.0576	17.9534	8.06854	8.99247	20.4487	19.6286
Solyc03g120850.2.1			Y			Y	151.282	152.081	83.2736	79.5388	77.0561	73.0376	127.418	122.214	72.3967	68.7001
Solyc03g120930.1.1	Y	Y	Y	Y	Y	Y	0.405402	0.118674	3.21783	2.934	1.44268	1.46891	0.186556	0.326152	5.78347	6.61067
Solyc03g120980.2.1			Y		Y	Y	12.2296	11.3927	5.8506	5.73046	4.62506	4.69236	9.00132	8.47994	6.24822	5.08513
Solyc03g121060.2.1		Y	Y	Y	Y	Y	59.8643	57.9722	16.6255	17.1455	16.0816	15.546	43.1877	43.052	6.45477	6.86492
Solyc03g121090.2.1		Y	Y	Y	Y		2.97295	3.08552	0.58506	0.366749	0.381886	0.367228	3.5912	3.12174	2.27208	2.23746
Solyc03g121170.2.1		Y	Y	Y	Y		2.36484	2.01746	4.8755	4.99696	5.26154	4.77397	3.03153	3.82063	2.01389	1.8815
Solyc03g121350.2.1			Y		Y		6.08103	4.74695	2.48651	1.92543	2.16402	2.16257	3.73112	3.96041	2.99501	2.49171
Solyc03g121400.1.1				Y			1.14864	0.77138	0.438795	0.916873	1.01836	1.14249	1.16597	1.11823	1.65242	1.37298
Solyc03g121440.2.1			Y		Y		254.728	245.536	94.3897	100.398	98.1447	99.6004	267.475	260.502	129.354	130.027
Solyc03g121660.2.1				Y	Y		3.44592	4.9843	10.1898	9.99392	7.76502	8.97669	5.13029	5.63776	4.54416	5.49194
Solyc03g121790.2.1					Y	Y	18.4458	18.6911	8.92217	7.61005	11.499	13.057	4.15087	3.58767	6.55805	7.06833
Solyc03g121900.1.1		Y	Y	Y	Y		1.35134	2.13613	5.99687	5.63877	6.66179	7.38537	1.02606	0.931862	1.44587	2.44086
Solyc03g122300.1.1			Y		Y		15.9458	17.089	7.02072	8.43524	5.94045	5.91645	22.3867	22.1783	10.9473	10.8313
Solyc03g122340.2.1			Y				211.755	210.349	105.701	107.549	82.8268	77.4851	310.289	313.991	145.62	154.079
Solyc03g122350.2.1			Y		Y	Y	0.945938	1.30541	5.94811	7.10577	7.72258	6.5285	1.35253	1.58417	4.80235	4.78002
Solyc03g123390.2.1			Y		Y	Y	4.32429	4.09425	23.6462	25.7183	23.3375	23.2578	2.00548	1.95691	22.6175	23.4424
Solyc03g123540.2.1		Y	Y		Y		94.0532	89.7174	33.446	32.549	20.1975	19.8303	101.813	104.415	59.797	60.1571
Solyc03g123670.2.1			Y	Y	Y	Y	5.40536	4.9843	0.29253	0.229218	0.594045	0.489638	6.85593	6.98896	0.877849	1.01703
Solyc03g123710.2.1		Y	Y	Y	Y	Y	3.58105	3.26353	0.48755	0.320906	0.254591	0.244819	2.9849	2.37625	7.90064	7.9328
Solyc04g005070.2.1			Y		Y	Y	53.1076	49.9024	124.13	114.426	124.919	129.632	49.2041	48.6898	122.434	119.297
Solyc04g005160.1.1						Y	29.797	27.3543	19.0145	19.5752	15.1906	14.2811	18.7955	20.5941	13.2194	12.7637
Solyc04g005250.2.1		Y	Y	Y	Y	Y	7.83777	7.0611	1.51141	2.01712	1.18809	1.14249	4.85045	4.56612	17.2988	15.052
Solyc04g005320.2.1		Y	Y	Y	Y	Y	23.3782	21.3613	0.048755	0	0	0.0408031	27.004	28.0956	0.722934	0.864472
Solyc04g005380.2.1		Y		Y		Y	16.0809	16.911	15.1141	15.2659	18.7548	18.2798	16.0438	15.9814	47.0424	43.6813
Solyc04g005850.1.1			Y		Y	Y	0.945938	1.06806	2.29149	2.01712	2.58834	2.6114	0.559668	0.372745	2.32372	2.84767
Solyc04g005910.2.1		Y	Y	Y	Y	Y	0.067567	0.118674	2.73028	2.15465	1.90943	1.3057	0.139917	0.0931862	0.258191	0.40681
Solyc04g005920.1.1			Y		Y	Y	0.945938	0.474695	3.07157	3.62165	2.6732	2.36658	0.46639	0.652303	2.53027	2.03405
Solyc04g006940.2.1					Y	Y	3.78375	4.50961	2.389	1.42115	2.84293	2.28498	3.91767	3.02855	1.80734	1.83065
Solyc04g007050.2.1			Y		Y	Y	0.743237	0.830717	1.85269	1.92543	1.78213	2.16257	0.839502	0.885269	1.65242	1.52554
Solyc04g007200.2.1		Y					3.10808	3.02618	4.53422	4.99696	6.32234	5.34521	1.25925	0.885269	2.73682	2.44086
Solyc04g007360.1.1			Y		Y		1.28377	0.712043	2.68153	1.7879	1.99429	2.20337	0.792863	1.16483	1.18768	2.03405
Solyc04g007390.2.1			Y		Y	Y	0.337835	0.356022	2.14522	2.61309	2.24888	2.24417	0.233195	0.232965	1.70406	2.23746
Solyc04g007870.2.1	Y				Y		0.608103	0.949391	1.70643	2.24634	0.975931	0.938472	0.606307	0.698896	1.44587	1.01703
Solyc04g007910.2.1					Y		107.094	108.409	219.105	217.895	210.971	214.665	89.8267	88.8064	167.359	169.284
Solyc04g007920.1.1				Y	Y		2.63511	2.84817	1.26763	1.32947	1.35782	1.59132	2.37859	2.32965	3.09829	2.59342
Solyc04g007940.2.1			Y		Y		0.67567	0.77138	1.80394	2.38387	1.56998	1.75453	0.886141	0.652303	1.49751	1.32213
Solyc04g007950.2.1			Y		Y	Y	0.540536	0.830717	2.97406	2.97984	2.07916	2.12176	1.30589	1.44439	1.80734	1.72894
Solyc04g008060.2.1			Y		Y	Y	64.9994	62.1258	19.9896	19.3919	21.6402	21.7481	52.0025	54.0014	17.4021	18.5607
Solyc04g008230.2.1			Y				190.674	191.54	105.165	106.816	82.742	81.1574	189.867	190.007	115.463	118.178
Solyc04g008330.1.1			Y		Y		9.93235	11.096	23.6462	23.747	21.5978	22.7273	5.36348	5.07865	14.6136	14.4418
Solyc04g008500.2.1			Y		Y	Y	0.608103	0.652706	2.24273	2.29218	1.61241	2.20337	0.559668	0.559117	1.44587	1.67809
Solyc04g008850.1.1				Y			5.20266	5.10298	8.58089	8.11433	4.83722	4.12112	8.16182	7.17534	3.45976	4.22066
Solyc04g009030.2.1						Y	49.932	54.8273	34.0798	33.7868	27.1988	27.2973	39.8763	41.8872	25.3027	23.6967
Solyc04g009440.2.1			Y		Y		2.29728	1.95812	0.68257	1.37531	0.891067	0.856866	1.72564	1.67735	1.03276	2.03405
Solyc04g009820.2.1						Y	290.335	299.533	532.6	548.703	557.766	566.919	229.697	230.356	761.973	790.483
Solyc04g009890.1.1			Y	Y	Y		37.7024	42.7819	11.1161	12.7904	12.5598	18.443	30.4086	36.7619	24.7863	25.6799
Solyc04g010200.1.1			Y		Y	Y	0.608103	0.593369	2.24273	1.92543	2.03673	1.71373	0.746224	1.02505	1.60078	1.16958
Solyc04g010320.1.1			Y	Y	Y	Y	21.216	22.3107	0.975101	0.595968	0.933499	1.06088	15.9972	15.2359	1.85897	1.42384
Solyc04g010330.2.1		Y	Y		Y		86.2155	86.1572	25.8402	28.7898	22.701	24.4411	108.902	113.175	52.4644	51.6649
Solyc04g011440.2.1	Y	Y	Y	Y		Y	253.106	252.241	233.537	235.636	75.7407	72.6296	336.267	337.381	582.53	584.637
Solyc04g011450.1.1	Y	Y	Y	Y		Y	8.37831	10.0873	8.33711	8.29771	2.24888	2.52979	13.2921	15.0962	19.8807	22.3237
Solyc04g011550.2.1			Y				50.1347	51.1484	24.8651	27.7354	22.6161	23.8698	32.6939	32.2424	31.8091	33.7144
Solyc04g014220.1.1					Y	Y	1.14864	1.18674	3.12032	2.97984	1.82457	2.5706	1.53909	1.63076	2.32372	3.05108
Solyc04g014360.2.1					Y		20.7431	19.0472	9.70225	9.30627	10.7777	12.2817	25.0451	24.0886	12.7546	12.1535
Solyc04g014480.2.1		Y	Y	Y	Y		27.9727	26.2269	6.58193	6.46396	4.5402	5.54923	30.875	31.4969	36.9729	38.4944
Solyc04g014510.2.1	Y	Y	Y		Y	Y	11.7567	10.562	0.68257	0.595968	0.297022	0.204016	9.3278	8.38676	0.516382	1.11873
Solyc04g014540.1.1			Y		Y	Y	4.93239	5.75568	0.341285	0.229218	0.297022	0.204016	9.46771	7.82764	0.258191	0.508513
Solyc04g014690.2.1					Y		2.02701	1.78011	0.731325	0.779342	1.61241	1.3057	1.11934	1.58417	1.03276	1.42384
Solyc04g014830.1.1		Y					1.48647	1.30541	1.46265	1.37531	1.10323	0.938472	1.35253	1.16483	2.27208	2.28831
Solyc04g015020.2.1			Y		Y	Y	13.6485	15.0122	1.4139	1.74206	1.56998	1.22409	14.8778	13.3722	2.27208	2.84767
Solyc04g015200.2.1		Y				Y	9.66208	11.5707	12.1888	11.4609	11.1596	9.34392	10.6803	11.6483	22.3593	22.1203
Solyc04g015460.2.1					Y		1.48647	1.24608	2.29149	3.16321	2.88536	2.44819	1.25925	1.11823	1.91061	2.89852
Solyc04g015540.1.1			Y		Y		0.67567	1.30541	2.43775	2.15465	2.46104	1.99935	0.886141	1.11823	1.54915	1.42384
Solyc04g015590.2.1			Y		Y	Y	4.25672	3.61955	1.17012	1.97128	1.31539	1.79534	2.19203	2.79559	1.54915	1.27128
Solyc04g016420.2.1						Y	2.43241	1.66143	2.14522	2.38387	2.71563	2.40738	1.49245	1.30461	4.80235	4.0681
Solyc04g016550.2.1					Y	Y	9.66208	9.37524	19.3557	19.9878	19.1792	17.9534	10.6337	10.5766	25.7158	25.985
Solyc04g016590.2.1					Y		19.5269	16.199	8.72715	8.66445	12.8993	11.2617	15.0644	14.8632	9.03668	10.1703
Solyc04g017720.2.1			Y		Y	Y	8.37831	7.65446	1.60892	2.88815	2.8005	2.6522	4.71054	4.28656	1.54915	1.93235
Solyc04g024840.2.1		Y	Y		Y	Y	4.59455	4.03491	0.536305	0.779342	0.763772	0.816063	3.8244	4.10019	0.309829	0.355959
Solyc04g025990.2.1			Y		Y	Y	94.9316	85.3265	197.897	192.131	198.708	191.448	76.7678	77.9968	185.02	180.573
Solyc04g026030.2.1						Y	34.1889	32.22	22.9149	23.7929	23.9315	22.8498	23.7859	25.6728	16.3693	15.4079
Solyc04g040220.2.1			Y				33.7159	34.1187	25.3039	24.9848	16.1241	14.7299	66.5538	65.3701	28.1428	26.4427
Solyc04g040230.1.1			Y				1.35134	1.78011	0.877591	0.825186	0.72134	0.734456	2.19203	1.86372	1.23932	1.16958
Solyc04g045310.2.1						Y	14.9999	16.2583	29.0092	26.2684	29.4901	28.4398	16.4169	14.6302	32.3255	33.7653
Solyc04g045540.1.1	Y	Y	Y	Y		Y	1.41891	0.77138	1.46265	1.23778	3.43697	3.54987	1.16597	1.30461	0.464744	0.40681
Solyc04g045550.1.1	Y	Y			Y		1.75674	1.54276	0.536305	0.962717	3.18238	1.95855	2.05212	2.0035	0.722934	0.966174
Solyc04g047890.2.1		Y	Y	Y	Y		3.10808	2.67016	1.31639	1.0544	0.891067	1.02008	2.37859	2.42284	3.87286	3.10193
Solyc04g049080.2.1			Y		Y	Y	0.135134	0.118674	1.90145	1.7879	1.06079	1.22409	0.139917	0.326152	1.39423	0.762769
Solyc04g049090.2.1			Y		Y	Y	1.82431	1.24608	12.9688	10.8191	14.9784	15.138	2.00548	2.56262	13.4776	13.5264
Solyc04g049190.1.1			Y		Y	Y	2.09458	2.49215	6.48442	5.63877	7.25583	7.18135	1.02606	1.77054	7.849	7.88195
Solyc04g049800.2.1			Y		Y	Y	0.202701	0.593369	1.85269	2.84231	1.7397	1.79534	0.233195	0.0931862	1.18768	1.8815
Solyc04g049920.2.1				Y			22.8376	23.1414	32.2271	32.5032	27.4958	26.114	16.8833	18.0781	13.7874	14.8486
Solyc04g050570.2.1			Y		Y		1.28377	1.66143	2.58402	3.39243	3.01266	4.24353	1.21261	1.16483	1.80734	2.13575
Solyc04g050790.2.1			Y		Y	Y	14.7972	14.0629	5.36305	5.0428	5.81315	6.4877	12.8257	13.4654	4.38924	5.8479
Solyc04g050820.1.1			Y		Y	Y	4.05402	3.08552	10.3361	10.7733	8.95311	7.46697	4.10423	3.26152	12.4448	13.4247
Solyc04g051280.2.1		Y					39.797	42.0699	29.0092	28.4231	23.4648	23.5842	30.5952	31.4503	49.3145	48.6138
Solyc04g051510.1.1						Y	67.1616	67.2287	132.321	127.95	113.038	113.106	77.1409	73.9898	137.719	133.688
Solyc04g053130.2.1						Y	5.54049	5.34032	3.85165	3.39243	3.13995	3.14184	4.01095	4.23997	2.06553	2.69512
Solyc04g054310.2.1			Y		Y		4.25672	4.03491	12.3838	13.1113	12.0506	13.4242	4.75718	4.37975	7.12607	7.8311
Solyc04g054370.1.1		Y					3.64862	4.03491	2.24273	2.934	1.95186	1.91775	3.40465	3.12174	4.44088	4.01725
Solyc04g054740.2.1			Y		Y	Y	34.1213	33.5254	110.674	106.541	104.722	101.477	33.72	33.0811	128.321	133.129
Solyc04g054790.1.1			Y		Y	Y	2.02701	2.67016	5.60683	5.7763	5.51613	6.07967	1.9122	1.53757	8.77849	7.42429
Solyc04g054800.2.1			Y		Y	Y	51.6887	52.6912	116.281	120.202	108.88	112.453	25.7914	25.5796	110.144	115.992
Solyc04g055050.1.1			Y				15.0674	17.2077	25.7914	26.7727	32.5027	32.6017	18.0959	18.2645	24.1667	25.7307
Solyc04g055080.2.1			Y		Y	Y	0.067567	0.356022	2.58402	2.06297	1.99429	1.42811	0.186556	0.232965	1.13604	1.62724
Solyc04g056260.1.1			Y				2.49998	1.89878	0.780081	1.51284	0.933499	1.06088	1.58573	1.77054	1.0844	1.27128
Solyc04g056380.2.1			Y		Y	Y	0.945938	1.06806	2.53526	2.42971	2.24888	2.40738	1.21261	1.07164	2.47863	3.91555
Solyc04g056450.2.1			Y			Y	4.86482	6.5864	3.21783	2.61309	2.16402	2.89702	5.96979	6.29007	2.63355	2.0849
Solyc04g057860.1.1			Y		Y	Y	0.743237	0.593369	1.60892	1.42115	1.82457	1.59132	1.35253	1.25801	1.44587	1.47469
Solyc04g058050.1.1						Y	0.878371	0.890054	1.80394	1.42115	1.44268	1.75453	1.0727	1.72394	2.42699	1.8815
Solyc04g058080.2.1			Y		Y	Y	15.9458	15.4276	35.1524	35.8956	38.4008	35.9476	15.2976	14.77	37.6442	38.3927
Solyc04g058100.2.1		Y		Y		Y	0.608103	0.77138	0.58506	0.412593	0.381886	0.571244	0.233195	0.0931862	2.47863	2.33916
Solyc04g063240.2.1						Y	15.9458	17.9198	11.4574	11.9652	12.8144	12.5266	14.7846	14.1643	8.41702	7.52599
Solyc04g063380.2.1		Y		Y		Y	83.1074	85.6232	97.4613	89.9911	93.5621	91.5622	97.4288	101.154	319.434	321.787
Solyc04g064610.2.1			Y			Y	14.1215	13.7662	7.7033	7.19746	6.95881	6.16127	16.7434	15.9348	6.29986	5.44109
Solyc04g064710.2.1			Y		Y	Y	1.75674	3.08552	11.7012	12.6987	10.8201	10.6904	2.23867	3.58767	10.3276	12.2552
Solyc04g071090.2.1			Y	Y	Y		8.10804	8.8412	2.63277	2.29218	3.52184	2.89702	8.76813	7.92083	6.45477	4.27151
Solyc04g071100.1.1					Y		1.89188	1.89878	0.926346	0.825186	1.40025	0.65285	3.5912	3.12174	1.0844	1.01703
Solyc04g071340.2.1						Y	1.82431	2.07679	2.58402	2.70478	2.29132	2.6114	2.23867	2.51603	3.61467	5.23768
Solyc04g071610.2.1		Y	Y	Y	Y		4.79726	3.56022	1.31639	1.23778	1.10323	1.3057	2.14539	2.84218	2.58191	2.89852
Solyc04g071770.2.1			Y		Y	Y	0.405402	0.415359	0.975101	1.10025	1.27295	1.14249	0.699585	0.419338	1.49751	1.9832
Solyc04g072230.2.1						Y	18.7836	20.2339	28.1804	29.5692	30.2114	28.9294	21.314	20.6407	41.2589	41.9523
Solyc04g072270.1.1						Y	0.810804	0.830717	1.17012	1.7879	1.44268	1.50972	0.46639	1.21142	1.60078	1.83065
Solyc04g072760.2.1			Y		Y	Y	3.51348	3.97557	1.31639	1.87959	1.90943	1.59132	3.12481	2.14328	1.03276	0.915323
Solyc04g072850.2.1						Y	89.0533	89.6581	57.3847	55.8376	58.0042	62.3064	69.9118	71.6136	35.9918	36.4095
Solyc04g072890.2.1		Y		Y		Y	13.9864	14.9529	22.4273	21.1339	14.0449	13.3426	9.79419	9.22543	52.7742	50.2919
Solyc04g073980.2.1			Y		Y	Y	3.71618	3.8569	9.50723	8.29771	9.80174	11.3841	3.63784	4.0536	8.46866	7.8311
Solyc04g074410.1.1						Y	45.6753	52.0385	35.2499	33.42	26.5623	26.3588	59.2315	57.7288	19.3643	18.0014
Solyc04g074430.1.1			Y	Y		Y	2.09458	2.31414	1.65767	1.87959	0.975931	1.14249	2.56514	2.28306	0.877849	0.661067
Solyc04g074440.1.1	Y	Y	Y				2.56755	1.83944	3.16908	3.71334	0.72134	0.938472	3.35801	2.46943	1.7557	1.72894
Solyc04g074450.1.1			Y			Y	25.1349	26.3456	20.5259	20.4921	11.6687	9.99677	32.041	30.5185	12.9612	12.1535
Solyc04g074480.2.1			Y		Y	Y	57.4995	59.3369	180.345	177.094	146.517	144.77	59.6513	59.4994	161.937	165.419
Solyc04g074640.2.1		Y		Y		Y	8.04047	10.562	4.92426	6.23474	5.38884	5.59003	7.13577	7.50149	2.68518	2.79682
Solyc04g074700.2.1			Y		Y	Y	2.56755	3.44154	0.975101	0.962717	0.212159	0.775259	6.52946	5.96392	0.722934	1.01703
Solyc04g074730.1.1			Y		Y		138.783	136.534	49.6326	53.6829	51.6395	50.6367	158.759	161.538	72.8098	79.1754
Solyc04g074990.2.1			Y	Y	Y		9.05398	10.918	36.8588	38.0503	26.0531	23.2986	10.6803	11.4153	17.4537	18.815
Solyc04g075000.1.1					Y		21.689	20.9459	46.7073	50.2905	33.9454	35.6619	20.3812	18.7304	29.4338	33.1042
Solyc04g076170.1.1			Y		Y	Y	0.337835	0.830717	1.36514	1.83375	1.14566	1.91775	1.11934	0.978455	1.44587	1.8815
Solyc04g076190.1.1					Y		13.2431	16.4363	29.3505	31.3112	19.0094	19.6263	20.9409	21.8988	17.0922	15.4588
Solyc04g076220.2.1			Y		Y	Y	29.2565	28.1257	143.535	150.872	129.332	125.184	29.5691	29.6332	112.778	120.823
Solyc04g076280.2.1			Y		Y	Y	0.067567	0.178011	43.4895	44.2391	57.0707	56.3899	1.30589	0.652303	36.4565	38.1385
Solyc04g076340.2.1						Y	23.7836	22.7854	27.7416	27.5979	28.9385	28.5214	23.4128	25.3466	50.9152	47.3425
Solyc04g076480.2.1			Y		Y	Y	7.63507	7.29844	2.29149	1.92543	1.40025	1.42811	8.81477	8.7595	2.06553	2.74597
Solyc04g076490.2.1						Y	2.90538	2.55149	5.11928	5.08865	4.28561	4.36593	3.31137	3.77404	5.37037	5.54279
Solyc04g076690.2.1		Y		Y			2.02701	2.49215	1.60892	1.00856	1.52754	1.2649	2.93826	1.86372	4.38924	4.67832
Solyc04g076700.2.1		Y		Y		Y	2.49998	2.84817	2.29149	2.84231	2.37618	2.69301	3.68448	4.19338	7.4359	6.45811
Solyc04g076820.1.1			Y				36.7564	34.7714	20.0383	20.9506	15.4876	16.158	32.7872	34.7584	22.3077	24.9171
Solyc04g077050.2.1			Y	Y	Y	Y	15.0674	14.4189	6.8257	6.32643	4.5402	4.03951	18.0959	19.1498	3.04665	3.00023
Solyc04g077160.1.1			Y		Y	Y	10.8783	9.67192	5.46056	4.08009	4.62506	4.52915	10.3072	8.94587	4.44088	3.20363
Solyc04g077180.1.1					Y		5.40536	6.88308	3.02281	2.61309	3.43697	3.38666	6.62274	5.82414	4.80235	4.93257
Solyc04g077210.2.1			Y		Y	Y	76.7561	70.611	23.9875	26.2684	22.3615	24.4003	82.1313	78.9753	29.1756	27.4597
Solyc04g077280.2.1			Y		Y	Y	0.67567	0.534032	1.56016	1.42115	1.95186	1.83614	0.979419	1.53757	2.89174	2.33916
Solyc04g077490.2.1			Y				429.726	418.503	842.731	820.373	899.596	912.521	471.38	469.519	834.989	822.52
Solyc04g077650.2.1			Y			Y	3.44592	3.73823	2.14522	1.69622	1.56998	1.87694	1.679	2.0501	1.49751	1.62724
Solyc04g077730.1.1						Y	0.743237	0.77138	1.26763	1.00856	1.01836	1.50972	0.886141	0.792083	1.54915	2.23746
Solyc04g077830.2.1				Y		Y	21.216	23.3194	14.5778	15.3576	11.499	11.2209	19.8216	19.3361	7.74573	6.76322
Solyc04g077850.2.1			Y		Y		2.97295	3.32287	1.36514	1.60453	1.56998	1.02008	2.37859	3.26152	2.1688	2.59342
Solyc04g077860.2.1		Y	Y		Y		45.1347	45.9268	20.2333	18.2916	15.0209	14.8931	46.4524	45.8942	33.3066	35.2399
Solyc04g077980.1.1	Y	Y	Y				1.55404	1.6021	2.04771	2.38387	0.678908	0.367228	0.46639	0.931862	1.85897	1.9832
Solyc04g077990.2.1	Y		Y	Y		Y	2.56755	2.7295	1.60892	1.65037	0.594045	0.571244	1.30589	0.931862	0.413105	0.813621
Solyc04g078010.2.1			Y		Y	Y	2.70268	2.2548	1.56016	0.916873	0.933499	0.979275	1.0727	1.3512	0.619658	0.661067
Solyc04g078060.1.1				Y		Y	3.17565	3.08552	4.24169	4.76774	5.30397	5.38601	3.35801	4.23997	8.41702	10.3228
Solyc04g078110.1.1			Y				22.2971	23.3194	13.5539	15.541	10.4806	11.2209	45.8928	42.8191	17.557	16.7301
Solyc04g078210.1.1					Y		10.8783	12.1047	6.53317	4.95112	7.08611	8.93589	7.1824	5.91732	8.00392	7.9328
Solyc04g078420.1.1		Y	Y				103.58	104.789	52.3142	52.491	38.6978	39.4158	107.876	109.727	97.5961	96.6174
Solyc04g078460.2.1		Y	Y	Y	Y	Y	121.012	118.793	9.70225	8.11433	6.83152	6.85493	161.651	165.219	25.3543	28.0191
Solyc04g078740.2.1			Y		Y	Y	3.85132	4.03491	1.56016	1.60453	0.975931	1.18329	1.30589	1.81713	0.361467	1.32213
Solyc04g078840.2.1		Y		Y		Y	27.4998	29.6091	36.9076	36.7208	32.036	33.8666	26.2577	25.4398	87.9398	83.1418
Solyc04g078860.2.1					Y	Y	9.12154	7.41712	3.65663	4.26346	5.00695	4.65156	8.02191	7.82764	4.75071	3.45789
Solyc04g078880.2.1		Y		Y		Y	1.48647	0.830717	0.731325	0.779342	0.551613	0.65285	0.699585	0.838676	3.97614	4.22066
Solyc04g079250.2.1						Y	1.14864	0.652706	1.36514	1.69622	1.7397	1.42811	1.02606	1.21142	2.32372	2.39001
Solyc04g079300.2.1		Y		Y		Y	18.5134	19.2252	18.0394	18.2458	17.8213	17.7494	23.5993	22.0385	37.1278	39.8166
Solyc04g079320.2.1		Y				Y	11.9594	14.3595	25.6451	25.8558	20.1975	20.7688	16.8367	14.7234	42.963	46.834
Solyc04g079430.2.1			Y		Y	Y	50.8779	52.5132	19.7945	22.5092	20.7067	23.217	46.4991	45.568	24.8896	25.0697
Solyc04g079570.1.1		Y					18.6485	20.1152	11.5062	12.4695	10.4806	9.91516	12.9656	12.9529	22.3593	24.1544
Solyc04g079660.2.1			Y		Y		9.86478	9.55325	4.43671	4.99696	3.86129	4.16192	12.5459	10.8562	7.17771	6.55982
Solyc04g079680.2.1			Y		Y	Y	7.9729	8.01049	3.3641	2.84231	1.7397	2.36658	10.5871	11.2755	2.73682	4.16981
Solyc04g079960.1.1			Y		Y	Y	12.8377	10.7993	4.8755	5.08865	4.58263	5.14119	10.4005	9.64477	4.18269	5.23768
Solyc04g080130.2.1			Y		Y	Y	5.74319	5.87436	69.0859	66.7942	65.1328	68.7533	4.29079	3.72745	64.083	67.2254
Solyc04g080170.2.1			Y		Y		11.3513	11.5707	23.6949	23.2886	23.3375	25.5428	13.3854	12.9063	21.9462	21.5101
Solyc04g080480.1.1			Y		Y	Y	0.472969	0.534032	1.07261	1.0544	1.7397	1.50972	1.0727	0.652303	1.44587	1.42384
Solyc04g080580.2.1			Y			Y	238.038	232.245	124.082	121.715	97.1263	98.5804	246.394	243.169	96.2535	100.584
Solyc04g080640.1.1		Y	Y		Y	Y	8.10804	8.12916	0.341285	0.320906	0.381886	0.204016	10.5871	10.0641	0.516382	0.762769
Solyc04g080700.2.1		Y		Y		Y	19.189	16.021	12.3838	14.3491	9.8866	9.58874	15.0644	14.8166	35.2172	35.3925
Solyc04g080740.1.1			Y				19.4593	19.6405	13.4076	12.2861	8.82581	9.34392	27.5636	27.024	11.1538	10.3228
Solyc04g080780.2.1			Y				5.94589	5.51833	10.9699	10.4524	13.3236	11.9145	7.4156	6.56963	6.24822	6.81407
Solyc04g080820.2.1			Y		Y	Y	6.554	6.64574	0.438795	0.550124	0.297022	0.244819	11.5198	10.2039	0.154915	0.457662
Solyc04g080940.2.1			Y	Y	Y	Y	5.20266	5.51833	43.8308	43.3223	35.473	34.7643	4.05759	3.82063	19.6225	21.0524
Solyc04g080970.2.1			Y		Y	Y	110.54	111.969	22.8661	24.939	25.6712	23.9514	152.043	153.944	35.2172	33.9178
Solyc04g081090.2.1						Y	112.296	113.63	70.4023	72.1121	68.6546	74.0577	88.3342	89.8315	41.5171	41.4438
Solyc04g081370.2.1			Y				29.8646	28.8377	14.529	15.541	11.6687	12.7714	32.6007	35.6903	19.5192	21.9678
Solyc04g081560.2.1			Y		Y	Y	1.28377	0.890054	6.67944	7.15161	5.51613	5.30441	0.606307	0.698896	4.54416	5.18683
Solyc04g081650.2.1				Y	Y		5.67563	4.74695	2.19398	2.06297	3.56427	3.50907	4.57062	4.98546	6.29986	5.28853
Solyc04g081790.2.1			Y		Y	Y	6.68913	6.17104	14.8215	12.5612	15.9119	15.6276	7.4156	7.82764	14.3038	15.2554
Solyc04g081870.2.1			Y				1.0135	0.830717	1.60892	1.92543	2.07916	2.08096	0.46639	0.792083	1.44587	1.06788
Solyc04g081890.1.1			Y		Y	Y	9.66208	10.0873	3.26659	4.53852	3.30968	3.42746	10.6337	9.97092	2.99501	3.05108
Solyc04g082030.1.1					Y		251.484	252.894	502.421	515.695	395.082	395.546	257.027	270.426	433.141	429.642
Solyc04g082050.2.1			Y		Y	Y	26.8241	24.1501	5.46056	6.92239	5.09181	5.46762	14.7846	13.279	7.53917	6.76322
Solyc04g082090.2.1			Y		Y		42.6348	46.1048	20.0871	20.3087	18.967	20.3608	51.1163	49.2023	26.8002	27.3071
Solyc04g082180.2.1			Y		Y	Y	8.24317	9.43457	2.53526	2.5214	1.48511	1.18329	15.2043	13.5586	2.37536	2.18661
Solyc04g082200.2.1		Y	Y	Y	Y		7.9729	6.70507	2.9253	3.39243	2.20645	1.87694	6.43618	6.70941	10.8957	10.9839
Solyc04g082290.2.1		Y	Y				150.607	148.936	75.1803	78.8053	63.2234	63.6121	174.057	174.538	141.179	140.706
Solyc04g082480.2.1			Y		Y	Y	4.39185	3.79756	19.0632	17.879	15.8271	15.954	3.63784	4.23997	13.4776	12.6111
Solyc04g082490.2.1			Y		Y	Y	17.162	15.0122	48.8038	48.1817	49.3057	51.9832	16.6968	14.4439	51.1734	50.0885
Solyc04g082590.2.1						Y	21.9593	23.8534	19.2582	19.071	18.2032	17.0557	23.6926	22.7374	11.412	11.3907
Solyc04g082630.2.1				Y		Y	41.9591	41.1205	39.3453	40.755	28.4293	28.6846	40.3427	40.6758	14.7169	16.1199
Solyc04g082830.2.1			Y				4.79726	4.92497	2.68153	2.56725	1.65484	1.63213	4.01095	3.63426	2.22044	2.69512
Solyc04g083160.1.1			Y				12.7702	10.918	6.97197	7.47252	6.15261	5.59003	9.00132	8.57313	7.849	6.61067
Solyc05g005120.2.1					Y		1.35134	0.77138	2.63277	1.92543	1.14566	1.50972	1.39917	1.53757	1.54915	1.42384
[truncated: 1,238 more rows]

## Sheet: C. annuum
geneid	groupMVM-groupTM	groupMVM-groupFM	groupTM-groupFM	Can_FM1	Can_FM2	Can_MVM1	Can_MVM2	Can_SYM1	Can_SYM2	Can_TM1	Can_TM2
[truncated: 2,015 more rows]

[truncated: 2 more sheets: N. benthamiana, S. prinophyllum]
