# Supplementary material for: The evolution of inflorescence diversity in the nightshades and heterochrony during meristem maturation
Source: HighWire-hosted journal article supplement (doi:10.1101/gr.207837.116), 2016-11-07
Supplement: Supplemental_Table_S9.xlsx [file Supplemental_Table_S9.xlsx]

## Sheet: STable09_PrecociousOverlapCount
Supplemental Table S9. Precocious gene overlap counts between tobacco and pepper for several counts per million (CPM) and fold change (FC) filters.
FCfilter	CPMfilter	Stage	Group	NotPrecocious	CanPrecocious	NbenthPrecocious	CanNbenthPrecocious	TotalGenes
1	1	FM	All Genes	43	55	38	50	186
1	1	FM	Transcription Factors	4	12	1	9	26
1	2	FM	All Genes	35	43	23	39	140
1	2	FM	Transcription Factors	2	11	1	8	22
1	3	FM	All Genes	30	35	17	33	115
1	3	FM	Transcription Factors	2	10	1	6	19
1	4	FM	All Genes	30	34	16	29	109
1	4	FM	Transcription Factors	2	10	1	6	19
1	5	FM	All Genes	25	31	14	24	94
1	5	FM	Transcription Factors	2	9	1	5	17
1.5	1	FM	All Genes	21	21	18	26	86
1.5	1	FM	Transcription Factors	2	4	3	6	15
1.5	2	FM	All Genes	18	13	12	19	62
1.5	2	FM	Transcription Factors	2	3	3	6	14
1.5	3	FM	All Genes	14	11	10	15	50
1.5	3	FM	Transcription Factors	2	3	3	4	12
1.5	4	FM	All Genes	13	10	9	13	45
1.5	4	FM	Transcription Factors	2	3	3	4	12
1.5	5	FM	All Genes	10	9	8	10	37
1.5	5	FM	Transcription Factors	2	3	3	3	11
2	1	FM	All Genes	16	9	4	7	36
2	1	FM	Transcription Factors	4	3	0	2	9
2	2	FM	All Genes	12	7	3	4	26
2	2	FM	Transcription Factors	4	3	0	2	9
2	3	FM	All Genes	10	5	1	3	19
2	3	FM	Transcription Factors	4	3	0	1	8
2	4	FM	All Genes	9	5	1	3	18
2	4	FM	Transcription Factors	4	3	0	1	8
2	5	FM	All Genes	9	5	1	1	16
2	5	FM	Transcription Factors	4	3	0	0	7
1	1	TM	All Genes	30	9	54	25	118
1	1	TM	Transcription Factors	5	1	9	6	21
1	2	TM	All Genes	22	9	44	20	95
1	2	TM	Transcription Factors	4	1	8	3	16
1	3	TM	All Genes	17	8	40	17	82
1	3	TM	Transcription Factors	3	1	7	2	13
1	4	TM	All Genes	13	7	35	15	70
1	4	TM	Transcription Factors	2	1	7	2	12
1	5	TM	All Genes	13	5	30	14	62
1	5	TM	Transcription Factors	2	1	6	2	11
1.5	1	TM	All Genes	22	3	23	8	56
1.5	1	TM	Transcription Factors	4	1	6	4	15
1.5	2	TM	All Genes	17	3	18	5	43
1.5	2	TM	Transcription Factors	4	1	5	2	12
1.5	3	TM	All Genes	13	2	16	3	34
1.5	3	TM	Transcription Factors	3	1	4	1	9
1.5	4	TM	All Genes	10	2	13	2	27
1.5	4	TM	Transcription Factors	2	1	4	1	8
1.5	5	TM	All Genes	9	1	11	2	23
1.5	5	TM	Transcription Factors	1	1	4	1	7
2	1	TM	All Genes	14	1	11	5	31
2	1	TM	Transcription Factors	4	0	2	4	10
2	2	TM	All Genes	10	1	9	3	23
2	2	TM	Transcription Factors	4	0	1	2	7
2	3	TM	All Genes	7	0	7	1	15
2	3	TM	Transcription Factors	3	0	0	1	4
2	4	TM	All Genes	5	0	6	1	12
2	4	TM	Transcription Factors	2	0	0	1	3
2	5	TM	All Genes	4	0	5	1	10
2	5	TM	Transcription Factors	1	0	0	1	2
