# Supplementary material for: The evolution of inflorescence diversity in the nightshades and heterochrony during meristem maturation
Source: HighWire-hosted journal article supplement (doi:10.1101/gr.207837.116), 2016-11-07
Supplement: Supplemental_Table_S10.xlsx [file Supplemental_Table_S10.xlsx]

## Sheet: STable10_PrecociousOverlapGenei
Supplemental Table S10. Precocious gene overlap orthogroups (given as tomato geneids) for several counts per million (CPM) and fold change (FC) cutoffs.
Orthogroup	FCcutoff	CPMcutoff	Stage	Assayed in	Prec in Nbenth	Prec in Can	Prec in both Nbenth and Can	Speru delayed	TF family	TF GOcat	Annotation
Solyc09g014530.2.1	1	1	FM	Can	Not prec	Not prec	FALSE	TRUE			Major latex-like protein (AHRD V1 **-- B5THI3_PANGI); contains Interpro domain(s) IPR000916 Bet v I allergen
Solyc07g061760.1.1	1	1	FM	Can	Not prec	Not prec	FALSE	FALSE			Ankyrin repeat family protein-like (AHRD V1 **-- Q6ERI3_ORYSJ); contains Interpro domain(s) IPR002110 Ankyrin
Solyc08g075940.2.1	1	1	FM	Can	Not prec	Not prec	FALSE	FALSE			DNA-directed RNA polymerase (AHRD V1 ***- B9IL57_POPTR); contains Interpro domain(s) IPR015712 DNA-directed RNA polymerase, subunit 2
Solyc09g092500.1.1	1	1	FM	Can	Not prec	Not prec	FALSE	FALSE			UDP-glucosyltransferase family 1 protein (AHRD V1 **** C6KI44_CITSI); contains Interpro domain(s) IPR002213 UDP-glucuronosyl/UDP-glucosyltransferase
Solyc03g120870.2.1	1	1	FM	Can	Not prec	Not prec	FALSE	TRUE			UPF0497 membrane protein 14 (AHRD V1 ***- U497E_VITVI); contains Interpro domain(s) IPR006459 Uncharacterised protein family UPF0497, trans-membrane plant subgroup
Solyc12g008650.1.1	1	1	FM	Can	Not prec	Not prec	FALSE	TRUE			Inositol oxygenase (AHRD V1 ***- A5FF81_FLAJ1); contains Interpro domain(s) IPR007828 Protein of unknown function DUF706
Solyc07g054780.1.1	1	1	FM	Can	Not prec	Not prec	FALSE	TRUE			Wound induced protein (AHRD V1 ***- B6T0U0_MAIZE)
Solyc07g052100.2.1	1	1	FM	Can	Not prec	Not prec	FALSE	TRUE			Chromodomain-helicase-DNA-binding protein 1-like (AHRD V1 *--* CHD1L_DANRE); contains Interpro domain(s) IPR014001 DEAD-like helicase, N-terminal
Solyc04g074850.2.1	1	1	FM	Can	Not prec	Not prec	FALSE	FALSE			Multidrug resistance protein mdtK (AHRD V1 **-- MDTK_YERP3); contains Interpro domain(s) IPR002528 Multi antimicrobial extrusion protein MatE
Solyc04g071620.2.1	1	1	FM	Can	Not prec	Not prec	FALSE	FALSE			ASR4 (Fragment) (AHRD V1 *-*- Q2QJU1_SOLLC); contains Interpro domain(s) IPR003496 ABA/WDS induced protein
Solyc09g075420.2.1	1	1	FM	Can	Not prec	Not prec	FALSE	TRUE	ERF	GO:0003677	Ethylene responsive transcription factor 2b (AHRD V1 *-*- C0J9I6_9ROSA); contains Interpro domain(s) IPR001471 Pathogenesis-related transcriptional factor and ERF, DNA-binding IPR001711 Phospholipase C, phosphatidylinositol-specific, Y domain
Solyc02g022850.1.1	1	1	FM	Can	Not prec	Not prec	FALSE	FALSE			FAD-binding domain-containing protein (AHRD V1 **-- D7MFH8_ARALY); contains Interpro domain(s) IPR006094 FAD linked oxidase, N-terminal
Solyc01g109610.2.1	1	1	FM	Can	Not prec	Not prec	FALSE	TRUE			2-hydroxyacid dehydrongenase (Fragment) (AHRD V1 *-*- C6F725_PSEMZ)
Solyc05g055400.2.1	1	1	FM	Can	Not prec	Not prec	FALSE	TRUE			Cytochrome P450
Solyc07g053120.2.1	1	1	FM	Can	Not prec	Not prec	FALSE	FALSE			Serine/threonine-protein kinase receptor (AHRD V1 *-** B6U2B7_MAIZE); contains Interpro domain(s) IPR002290 Serine/threonine protein kinase
Solyc04g054990.2.1	1	1	FM	Can	Not prec	Not prec	FALSE	FALSE			Lipoxygenase homology domain-containing protein 1 (AHRD V1 *--- LOXH1_HUMAN); contains Interpro domain(s) IPR001024 Lipoxygenase, LH2
Solyc02g090410.2.1	1	1	FM	Can	Not prec	Not prec	FALSE	TRUE	LBD		LOB domain family protein (AHRD V1 ***- D7LG10_ARALY); contains Interpro domain(s) IPR004883 Lateral organ boundaries, LOB
Solyc06g066770.1.1	1	1	FM	Can	Not prec	Not prec	FALSE	TRUE			Kelch repeat-containing F-box family protein (AHRD V1 ***- D7KDI0_ARALY); contains Interpro domain(s) IPR015915 Kelch-type beta propeller
Solyc01g108940.1.1	1	1	FM	Can	Not prec	Not prec	FALSE	TRUE	B3	GO:0006355	B3 domain-containing protein Os11g0197600 (AHRD V1 *-*- Y1176_ORYSJ); contains Interpro domain(s) IPR003340 Transcriptional factor B3
Solyc02g067440.2.1	1	1	FM	Can	Not prec	Not prec	FALSE	TRUE			Cupin RmlC-type (AHRD V1 **-- B4F886_MAIZE); contains Interpro domain(s) IPR012864 Protein of unknown function DUF1637
Solyc02g079510.2.1	1	1	FM	Can	Not prec	Not prec	FALSE	TRUE			Peroxidase (AHRD V1 **** Q50LG4_TOBAC); contains Interpro domain(s) IPR019793 Peroxidases heam-ligand binding site IPR019794 Peroxidase, active site IPR002016 Haem peroxidase, plant/fungal/bacterial
Solyc07g054760.1.1	1	1	FM	Can	Not prec	Not prec	FALSE	FALSE			Wound induced protein (AHRD V1 ***- B6T0U0_MAIZE)
Solyc12g094450.1.1	1	1	FM	Can	Not prec	Prec	FALSE	TRUE			Peroxisomal multifunctional enzyme type 2 (AHRD V1 **-- B4FP93_MAIZE); contains Interpro domain(s) IPR002539 MaoC-like dehydratase
Solyc03g121090.2.1	1	1	FM	Can	Not prec	Prec	FALSE	FALSE			Cold induced protein-like (AHRD V1 **-- Q94JH8_ORYSJ)
Solyc08g074480.1.1	1	1	FM	Can	Not prec	Prec	FALSE	TRUE			Cortical cell-delineating protein (AHRD V1 **-- B6UGA2_MAIZE); contains Interpro domain(s) IPR013770 Plant lipid transfer protein and hydrophobic protein, helical
Solyc03g043700.2.1	1	1	FM	Can	Not prec	Prec	FALSE	TRUE			Armadillo/beta-catenin repeat family protein (AHRD V1 **-- D7L0H5_ARALY); contains Interpro domain(s) IPR011989 Armadillo-like helical
Solyc12g013700.1.1	1	1	FM	Can	Not prec	Prec	FALSE	FALSE			Aluminum-induced protein-like protein (AHRD V1 ***- Q8S2R9_THEHA)
Solyc07g061730.2.1	1	1	FM	Can	Not prec	Prec	FALSE	FALSE			Gibberellin 2-oxidase (AHRD V1 **** A4GVL9_SOLLC); contains Interpro domain(s) IPR005123 Oxoglutarate and iron-dependent oxygenase
Solyc10g081320.1.1	1	1	FM	Can	Not prec	Prec	FALSE	TRUE	MYB	GO:0003700	MYB transcription factor (AHRD V1 *--* Q9C5P9_ARATH); contains Interpro domain(s) IPR015495 Myb transcription factor
Solyc02g070890.2.1	1	1	FM	Can	Not prec	Prec	FALSE	TRUE			Receptor like kinase, RLK
Solyc09g011060.2.1	1	1	FM	Can	Not prec	Prec	FALSE	FALSE			Receptor like protein kinase (AHRD V1 **** Q39139_ARATH); contains Interpro domain(s) IPR001220 Legume lectin, beta chain
Solyc07g063640.1.1	1	1	FM	Can	Not prec	Prec	FALSE	TRUE			Wound induced protein (AHRD V1 ***- B6SKC8_MAIZE)
Solyc08g066790.2.1	1	1	FM	Can	Not prec	Prec	FALSE	TRUE			Phospholipase D (AHRD V1 **** Q9FR61_SOLLC); contains Interpro domain(s) IPR011402 Phospholipase D, plant
Solyc03g006490.2.1	1	1	FM	Can	Not prec	Prec	FALSE	TRUE			Aluminum-induced protein-like (AHRD V1 ***- Q9FG81_ARATH)
Solyc12g007150.1.1	1	1	FM	Can	Not prec	Prec	FALSE	FALSE			Pollen-specific kinase partner protein-like protein (Fragment) (AHRD V1 *--- Q5DK68_SOLLC); contains Interpro domain(s) IPR005512 Rop nucleotide exchanger, PRONE
Solyc12g006680.1.1	1	1	FM	Can	Not prec	Prec	FALSE	TRUE			Early nodulin 93 protein (AHRD V1 ***- A3FGC9_9ROSI); contains Interpro domain(s) IPR005050 Early nodulin 93 ENOD93 protein
Solyc07g062490.1.1	1	1	FM	Can	Not prec	Prec	FALSE	TRUE			S-locus-specific glycoprotein (AHRD V1 **-- SLSG0_BRAOA); contains Interpro domain(s) IPR001480 Curculin-like (mannose-binding) lectin
Solyc07g055780.2.1	1	1	FM	Can	Not prec	Prec	FALSE	TRUE			Os06g0207500 protein (Fragment) (AHRD V1 ***- Q0DDQ9_ORYSJ); contains Interpro domain(s) IPR004253 Protein of unknown function DUF231, plant
Solyc06g083900.2.1	1	1	FM	Can	Not prec	Prec	FALSE	FALSE	MYB	GO:0003700	Myb-related transcription factor (AHRD V1 **-* B2CZJ1_CAPAN); contains Interpro domain(s) IPR015495 Myb transcription factor
Solyc01g094870.1.1	1	1	FM	Can	Not prec	Prec	FALSE	FALSE			MRNA clone RAFL21-92-I07 (AHRD V1 *--- Q681W9_ARATH); contains Interpro domain(s) IPR006461 Protein of unknown function Cys-rich
Solyc03g112160.2.1	1	1	FM	Can	Not prec	Prec	FALSE	FALSE			Protein DEHYDRATION-INDUCED 19 homolog 5 (AHRD V1 ***- DI195_ORYSJ); contains Interpro domain(s) IPR008598 Drought induced 19
Solyc01g099620.2.1	1	1	FM	Can	Not prec	Prec	FALSE	TRUE			Respiratory burst oxidase-like protein (AHRD V1 **** C1IHQ9_9ROSI); contains Interpro domain(s) IPR013121 Ferric reductase, NAD binding
Solyc04g014800.2.1	1	1	FM	Can	Not prec	Prec	FALSE	FALSE			L-galactose-1-phosphate phosphatase 2
Solyc02g088200.2.1	1	1	FM	Can	Not prec	Prec	FALSE	FALSE			Activating signal cointegrator 1 complex subunit 1 (AHRD V1 **-- C3KHG7_ANOFI)
Solyc12g008400.1.1	1	1	FM	Can	Not prec	Prec	FALSE	FALSE			Receptor like kinase, RLK
Solyc07g061720.2.1	1	1	FM	Can	Not prec	Prec	FALSE	FALSE			Gibberellin 2-oxidase (AHRD V1 **** A4GVL8_SOLLC); contains Interpro domain(s) IPR005123 Oxoglutarate and iron-dependent oxygenase
Solyc07g055280.2.1	1	1	FM	Can	Not prec	Prec	FALSE	FALSE	WRKY		WRKY transcription factor 5 (AHRD V1 ***- A7UGD2_SOLTU); contains Interpro domain(s) IPR003657 DNA-binding WRKY
Solyc04g071820.2.1	1	1	FM	Can	Not prec	Prec	FALSE	FALSE			Cytochrome P450
Solyc07g054770.1.1	1	1	FM	Can	Not prec	Prec	FALSE	TRUE			Wound induced protein (AHRD V1 ***- B6SKC8_MAIZE)
Solyc03g095940.1.1	1	1	FM	Can	Not prec	Prec	FALSE	FALSE	LBD		LOB domain family protein (AHRD V1 ***- D7L9U4_ARALY); contains Interpro domain(s) IPR004883 Lateral organ boundaries, LOB
Solyc05g009270.2.1	1	1	FM	Can	Not prec	Prec	FALSE	TRUE			Fatty acid elongase 3-ketoacyl-CoA synthase (AHRD V1 **** Q6DUV5_BRANA); contains Interpro domain(s) IPR012392 Very-long-chain 3-ketoacyl-CoA synthase
Solyc10g086500.1.1	1	1	FM	Can	Not prec	Prec	FALSE	FALSE			3-oxo-5-alpha-steroid 4-dehydrogenase family protein expressed (AHRD V1 ***- Q53NE6_ORYSJ); contains Interpro domain(s) IPR016636 3-oxo-5-alpha-steroid 4-dehydrogenase IPR001104 3-oxo-5-alpha-steroid 4-dehydrogenase, C-terminal
Solyc09g075890.2.1	1	1	FM	Can	Not prec	Prec	FALSE	FALSE			Pyrimidine 5&apos-nucleotidase (AHRD V1 **** B4WF69_9CAUL); contains Interpro domain(s) IPR010237 Pyrimidine 5-nucleotidase
Solyc02g087510.2.1	1	1	FM	Can	Not prec	Prec	FALSE	TRUE			Ribosomal protein S6 kinase alpha-2 (AHRD V1 *-** KS6A2_HUMAN); contains Interpro domain(s) IPR002290 Serine/threonine protein kinase
Solyc04g072030.1.1	1	1	FM	Can	Not prec	Prec	FALSE	FALSE			Interferon-induced GTP-binding protein Mx (Fragment) (AHRD V1 *--- MX_PERFL); contains Interpro domain(s) IPR015577 Interferon-induced Mx protein
Solyc11g069240.1.1	1	1	FM	Can	Not prec	Prec	FALSE	FALSE	C2H2		Zinc finger family protein (AHRD V1 **-- D7M7Z8_ARALY); contains Interpro domain(s) IPR007087 Zinc finger, C2H2-type
Solyc02g065290.1.1	1	1	FM	Can	Not prec	Prec	FALSE	FALSE	Dof	GO:0003700	Dof zinc finger protein 6 (AHRD V1 *-*- A5HWF5_HORVD); contains Interpro domain(s) IPR003851 Zinc finger, Dof-type
Solyc06g068550.2.1	1	1	FM	Can	Not prec	Prec	FALSE	FALSE			Aspartic proteinase nepenthesin-1 (AHRD V1 **-- C0JAB4_ORYCO); contains Interpro domain(s) IPR001461 Peptidase A1
Solyc02g078150.2.1	1	1	FM	Can	Not prec	Prec	FALSE	TRUE			Plant-specific domain TIGR01615 family protein (AHRD V1 *-*- B6UDN7_MAIZE); contains Interpro domain(s) IPR006502 Protein of unknown function DUF506, plant
Solyc12g009680.1.1	1	1	FM	Can	Not prec	Prec	FALSE	TRUE			Adiponectin receptor protein 2 (AHRD V1 ***- B0W6M8_CULQU); contains Interpro domain(s) IPR004254 Hly-III related
Solyc05g005060.2.1	1	1	FM	Can	Not prec	Prec	FALSE	TRUE			S-receptor kinase (AHRD V1 **** Q43393_BRANA); contains Interpro domain(s) IPR002290 Serine/threonine protein kinase
Solyc01g108910.2.1	1	1	FM	Can	Not prec	Prec	FALSE	FALSE			COSII_At2g15890 (Fragment) (AHRD V1 *-*- C0KFD9_9SOLN)
Solyc10g005320.2.1	1	1	FM	Can	Not prec	Prec	FALSE	TRUE			Tryptophan synthase beta chain 1 (AHRD V1 **** Q0WUI8_ARATH); contains Interpro domain(s) IPR006654 Tryptophan synthase, beta chain
Solyc07g008710.2.1	1	1	FM	Can	Not prec	Prec	FALSE	TRUE			Major latex-like protein (AHRD V1 **-- B5THI3_PANGI); contains Interpro domain(s) IPR000916 Bet v I allergen
Solyc02g094010.1.1	1	1	FM	Can	Not prec	Prec	FALSE	FALSE			Receptor-like protein kinase (AHRD V1 *-*- Q9LYS5_ARATH); contains Interpro domain(s) IPR002290 Serine/threonine protein kinase
Solyc08g077210.2.1	1	1	FM	Can	Not prec	Prec	FALSE	TRUE			Inositol 1 4 5-trisphosphate 5-phosphatase (AHRD V1 *-** Q712G2_ARATH); contains Interpro domain(s) IPR000300 Inositol polyphosphate related phosphatase
Solyc01g110590.2.1	1	1	FM	Can and Nbenth	Not prec	Not prec	FALSE	TRUE			Auxin-induced SAUR-like protein (AHRD V1 ***- Q8S349_CAPAN); contains Interpro domain(s) IPR003676 Auxin responsive SAUR protein
Solyc11g066130.1.1	1	1	FM	Can and Nbenth	Not prec	Not prec	FALSE	FALSE			Thaumatin-like protein (AHRD V1 **-- D2KU75_CITJA); contains Interpro domain(s) IPR017949 Thaumatin, conserved site IPR001938 Thaumatin, pathogenesis-related
Solyc04g063210.2.1	1	1	FM	Can and Nbenth	Not prec	Not prec	FALSE	TRUE			Caffeoyl-CoA O-methyltransferase (AHRD V1 **** A0SDG2_9CONI); contains Interpro domain(s) IPR002935 O-methyltransferase, family 3
Solyc04g008060.2.1	1	1	FM	Can and Nbenth	Not prec	Not prec	FALSE	TRUE			Vacuolar iron transporter Ccc1 (AHRD V1 **-* C5GIS5_AJEDR); contains Interpro domain(s) IPR008217 Protein of unknown function DUF125, transmembrane
Solyc08g082890.2.1	1	1	FM	Can and Nbenth	Not prec	Not prec	FALSE	FALSE	MYB	GO:0003677	MYB transcription factor (AHRD V1 **-- D0VYJ9_DIOKA); contains Interpro domain(s) IPR015495 Myb transcription factor
Solyc12g006860.1.1	1	1	FM	Can and Nbenth	Not prec	Not prec	FALSE	TRUE			Cytochrome P450
Solyc04g074080.2.1	1	1	FM	Can and Nbenth	Not prec	Not prec	FALSE	FALSE			WW domain containing protein expressed (AHRD V1 *-*- Q2QVE4_ORYSJ); contains Interpro domain(s) IPR001202 WW/Rsp5/WWP
Solyc06g053610.2.1	1	1	FM	Can and Nbenth	Not prec	Not prec	FALSE	FALSE	MYB	GO:0003700	Myb-related transcription factor (AHRD V1 **-* A7ULI0_DATME); contains Interpro domain(s) IPR017930 Myb-type HTH DNA-binding domain
Solyc10g083730.1.1	1	1	FM	Can and Nbenth	Not prec	Not prec	FALSE	FALSE			F-box protein PP2-B1 (AHRD V1 *-*- PP2B1_ARATH); contains Interpro domain(s) IPR001810 Cyclin-like F-box
Solyc02g079190.2.1	1	1	FM	Can and Nbenth	Not prec	Not prec	FALSE	TRUE			Auxin F-box protein 5 (AHRD V1 **-- D7MPH1_ARALY); contains Interpro domain(s) IPR001810 Cyclin-like F-box
Solyc03g116900.2.1	1	1	FM	Can and Nbenth	Not prec	Not prec	FALSE	TRUE			Manganese transporter MntH (AHRD V1 **-* D3KPZ0_LISMO); contains Interpro domain(s) IPR001046 Natural resistance-associated macrophage protein
Solyc09g009260.2.1	1	1	FM	Can and Nbenth	Not prec	Not prec	FALSE	TRUE			Fructose-bisphosphate aldolase (AHRD V1 ***- Q2PYX3_SOLTU); contains Interpro domain(s) IPR000741 Fructose-bisphosphate aldolase, class-I
Solyc12g005990.1.1	1	1	FM	Can and Nbenth	Not prec	Not prec	FALSE	TRUE			Dual specificity protein phosphatase 4 (AHRD V1 ***- B6U4B9_MAIZE); contains Interpro domain(s) IPR020422 Dual specificity phosphatase, subgroup, catalytic domain
Solyc06g053480.2.1	1	1	FM	Can and Nbenth	Not prec	Not prec	FALSE	TRUE			Stearoyl-acyl carrier protein desaturase (AHRD V1 **** B7TZ44_SPIOL); contains Interpro domain(s) IPR005067 Fatty acid desaturase, type 2
Solyc02g082170.1.1	1	1	FM	Can and Nbenth	Not prec	Not prec	FALSE	FALSE			Purine permease (AHRD V1 *--* B6TET5_MAIZE); contains Interpro domain(s) IPR004853 Protein of unknown function DUF250
Solyc01g090460.2.1	1	1	FM	Can and Nbenth	Not prec	Not prec	FALSE	FALSE	HD-ZIP		Homeobox-leucine zipper protein (AHRD V1 *-*- Q39862_SOYBN); contains Interpro domain(s) IPR001356 Homeobox IPR017970 Homeobox, conserved site
Solyc07g062820.1.1	1	1	FM	Can and Nbenth	Not prec	Not prec	FALSE	TRUE			Pentatricopeptide repeat protein PPR1106-17 (AHRD V1 ***- B6SWY6_MAIZE); contains Interpro domain(s) IPR002885 Pentatricopeptide repeat
Solyc11g016970.1.1	1	1	FM	Can and Nbenth	Not prec	Not prec	FALSE	FALSE			Multidrug resistance protein mdtK (AHRD V1 *-*- MDTK_ENTS8); contains Interpro domain(s) IPR002528 Multi antimicrobial extrusion protein MatE
Solyc04g082870.1.1	1	1	FM	Can and Nbenth	Not prec	Not prec	FALSE	FALSE			Pentatricopeptide repeat-containing protein (AHRD V1 ***- D7KAJ5_ARALY); contains Interpro domain(s) IPR002885 Pentatricopeptide repeat
Solyc01g099910.2.1	1	1	FM	Can and Nbenth	Not prec	Not prec	FALSE	TRUE			Epoxide hydrolase (AHRD V1 ***- B3VMR4_NICBE); contains Interpro domain(s) IPR000639 Epoxide hydrolase-like
Solyc12g006850.1.1	1	1	FM	Can and Nbenth	Not prec	Not prec	FALSE	FALSE			Potassium channel (AHRD V1 ***- Q9LEG6_SOLLC); contains Interpro domain(s) IPR002110 Ankyrin
Solyc03g114460.2.1	1	1	FM	Can and Nbenth	Not prec	Not prec	FALSE	TRUE			Acetyl-coenzyme A synthetase (AHRD V1 ***- D5HA95_SALRM); contains Interpro domain(s) IPR000873 AMP-dependent synthetase and ligase
Solyc06g084140.2.1	1	1	FM	Can and Nbenth	Not prec	Not prec	FALSE	TRUE			High affinity sulfate transporter 1 (AHRD V1 **** SUT1_STYHA); contains Interpro domain(s) IPR001902 Sulphate anion transporter
Solyc02g087620.2.1	1	1	FM	Can and Nbenth	Not prec	Not prec	FALSE	TRUE			Inositol hexakisphosphate and diphosphoinositol-pentakisphosphate kinase 2 (AHRD V1 **-* VIP2_MOUSE); contains Interpro domain(s) IPR000560 Histidine acid phosphatase
Solyc01g080900.2.1	1	1	FM	Can and Nbenth	Not prec	Not prec	FALSE	TRUE			Cytochrome P450
Solyc11g009050.1.1	1	1	FM	Can and Nbenth	Not prec	Not prec	FALSE	TRUE			F-box protein-like (AHRD V1 ***- Q67X80_ORYSJ); contains Interpro domain(s) IPR001810 Cyclin-like F-box
Solyc01g102470.2.1	1	1	FM	Can and Nbenth	Not prec	Not prec	FALSE	FALSE			Pentatricopeptide repeat-containing protein (AHRD V1 *-*- D7MEW5_ARALY); contains Interpro domain(s) IPR002885 Pentatricopeptide repeat
Solyc03g123610.2.1	1	1	FM	Can and Nbenth	Not prec	Not prec	FALSE	TRUE			Alanine aminotransferase (AHRD V1 ***- Q6VEJ5_CAPAN); contains Interpro domain(s) IPR004839 Aminotransferase, class I and II
Solyc10g076510.1.1	1	1	FM	Can and Nbenth	Not prec	Not prec	FALSE	TRUE			Pyruvate decarboxylase (AHRD V1 **** B0ZS79_PRUAR); contains Interpro domain(s) IPR012110 Pyruvate decarboxylase/indolepyruvate decarboxylase
Solyc01g107980.2.1	1	1	FM	Can and Nbenth	Not prec	Not prec	FALSE	TRUE			U-box domain-containing protein (AHRD V1 ***- A8IXJ0_BRACM); contains Interpro domain(s) IPR011989 Armadillo-like helical
Solyc01g111880.2.1	1	1	FM	Can and Nbenth	Not prec	Not prec	FALSE	TRUE			Tyrosine-protein kinase transforming protein Src (AHRD V1 *-** SRC_AVIST); contains Interpro domain(s) IPR015783 ATMRK serine/threonine protein kinase-like
Solyc09g072630.2.1	1	1	FM	Can and Nbenth	Not prec	Not prec	FALSE	TRUE			LRR receptor-like serine/threonine-protein kinase, RLP
Solyc06g048410.2.1	1	1	FM	Can and Nbenth	Not prec	Not prec	FALSE	TRUE			Superoxide dismutase (AHRD V1 **** Q7YK44_SOLLC); contains Interpro domain(s) IPR019833 Manganese/iron superoxide dismutase, binding site IPR001189 Manganese/iron superoxide dismutase
Solyc06g007180.2.1	1	1	FM	Can and Nbenth	Not prec	Not prec	FALSE	TRUE			Asparagine synthase (Glutamine-hydrolyzing) (AHRD V1 **** A9EDI4_9FLAO); contains Interpro domain(s) IPR006426 Asparagine synthase, glutamine-hydrolyzing
Solyc04g076830.2.1	1	1	FM	Can and Nbenth	Not prec	Not prec	FALSE	TRUE			Phosphoglycerate mutase-like protein (AHRD V1 ***- Q8LGT8_SOYBN); contains Interpro domain(s) IPR013078 Phosphoglycerate mutase
Solyc01g010970.2.1	1	1	FM	Can and Nbenth	Not prec	Not prec	FALSE	FALSE			ARGONAUTE 1 (AHRD V1 ***- D6RUV9_TOBAC); contains Interpro domain(s) IPR003165 Stem cell self-renewal protein Piwi
Solyc08g074630.1.1	1	1	FM	Can and Nbenth	Not prec	Not prec	FALSE	FALSE			Polyphenol oxidase (AHRD V1 ***- Q41428_SOLTU); contains Interpro domain(s) IPR016213 Polyphenol oxidase, plant
Solyc02g068410.1.1	1	1	FM	Can and Nbenth	Not prec	Not prec	FALSE	FALSE			AT4G20050-like protein (Fragment) (AHRD V1 *-*- D6PQZ2_9BRAS); contains Interpro domain(s) IPR011050 Pectin lyase fold/virulence factor
Solyc08g063040.2.1	1	1	FM	Can and Nbenth	Not prec	Not prec	FALSE	TRUE	C2H2		Zinc finger protein (AHRD V1 *-*- Q9LVQ7_ARATH); contains Interpro domain(s) IPR007087 Zinc finger, C2H2-type
Solyc03g113710.2.1	1	1	FM	Can and Nbenth	Not prec	Not prec	FALSE	TRUE			Formin 3 (AHRD V1 *-*- D0QAN4_ARATH); contains Interpro domain(s) IPR015425 Actin-binding FH2
Solyc12g006450.1.1	1	1	FM	Can and Nbenth	Not prec	Not prec	FALSE	TRUE			Aminotransferase-like protein (AHRD V1 ***- Q9LIE2_ARATH); contains Interpro domain(s) IPR005814 Aminotransferase class-III
Solyc10g005000.2.1	1	1	FM	Can and Nbenth	Not prec	Not prec	FALSE	TRUE			Os03g0648300 protein (Fragment) (AHRD V1 *--- Q0DPZ6_ORYSJ); contains Interpro domain(s) IPR000048 IQ calmodulin-binding region
Solyc11g071480.1.1	1	1	FM	Can and Nbenth	Not prec	Not prec	FALSE	TRUE			Hydroxycinnamoyl CoA shikimate/quinate hydroxycinnamoyltransferase-like protein (Fragment) (AHRD V1 **-- B9GF60_POPTR); contains Interpro domain(s) IPR003480 Transferase
Solyc04g078540.2.1	1	1	FM	Can and Nbenth	Not prec	Prec	FALSE	FALSE			Cathepsin B-like cysteine proteinase (AHRD V1 **-* CYSP_SCHMA); contains Interpro domain(s) IPR013128 Peptidase C1A, papain
Solyc07g063940.1.1	1	1	FM	Can and Nbenth	Not prec	Prec	FALSE	FALSE	GRAS	GO:0003700	GRAS family transcription factor (AHRD V1 **-* B9I7E1_POPTR); contains Interpro domain(s) IPR005202 GRAS transcription factor
Solyc08g083210.2.1	1	1	FM	Can and Nbenth	Not prec	Prec	FALSE	TRUE			Endoglucanase 1 (AHRD V1 ***- B6U0P7_MAIZE); contains Interpro domain(s) IPR001701 Glycoside hydrolase, family 9
Solyc04g080290.2.1	1	1	FM	Can and Nbenth	Not prec	Prec	FALSE	FALSE			CRAL/TRIO domain containing protein expressed (AHRD V1 **-- Q75GU9_ORYSJ); contains Interpro domain(s) IPR001251 Cellular retinaldehyde-binding/triple function, C-terminal
Solyc09g090070.1.1	1	1	FM	Can and Nbenth	Not prec	Prec	FALSE	TRUE			Inorganic phosphate transporter (AHRD V1 **** O22548_SOLLC); contains Interpro domain(s) IPR004738 Phosphate permease
Solyc02g081120.2.1	1	1	FM	Can and Nbenth	Not prec	Prec	FALSE	TRUE	TALE		Knotted-1-like homeobox protein H1 (AHRD V1 ***- Q8GUS6_TOBAC); contains Interpro domain(s) IPR005541 KNOX2
Solyc02g081010.1.1	1	1	FM	Can and Nbenth	Not prec	Prec	FALSE	TRUE		GO:0003700	Transcription factor jumonji domain-containing protein (AHRD V1 **-* D7KN75_ARALY); contains Interpro domain(s) IPR013129 Transcription factor jumonji
Solyc04g071890.2.1	1	1	FM	Can and Nbenth	Not prec	Prec	FALSE	FALSE			Peroxidase 4 (AHRD V1 **** B7UCP4_LITCN); contains Interpro domain(s) IPR002016 Haem peroxidase, plant/fungal/bacterial
Solyc06g075360.2.1	1	1	FM	Can and Nbenth	Not prec	Prec	FALSE	FALSE			Senescence-associated protein (AHRD V1 ***- B6T9C5_MAIZE); contains Interpro domain(s) IPR000301 Tetraspanin, subgroup
Solyc04g082880.2.1	1	1	FM	Can and Nbenth	Not prec	Prec	FALSE	TRUE			Diphosphate--fructose-6-phosphate 1-phosphotransferase (AHRD V1 ***- C8PT93_9SPIO); contains Interpro domain(s) IPR011183 Pyrophosphate-dependent phosphofructokinase PfpB
Solyc06g068540.2.1	1	1	FM	Can and Nbenth	Not prec	Prec	FALSE	FALSE			Transcription regulatory protein SNF5 (AHRD V1 *-*- D3B6R9_POLPA)
Solyc08g083230.1.1	1	1	FM	Can and Nbenth	Not prec	Prec	FALSE	FALSE	GRF		Growth-regulating factor 3 (AHRD V1 *--- Q6AWY6_ORYSJ); contains Interpro domain(s) IPR014977 WRC
Solyc07g042170.2.1	1	1	FM	Can and Nbenth	Not prec	Prec	FALSE	TRUE			Jasmonate ZIM-domain protein 3 (AHRD V1 **-- B3Y563_TOBAC); contains Interpro domain(s) IPR010399 Tify
Solyc01g006400.2.1	1	1	FM	Can and Nbenth	Not prec	Prec	FALSE	TRUE			Cysteine-rich extensin-like protein-4 (AHRD V1 *-*- Q08197_TOBAC)
Solyc02g088340.2.1	1	1	FM	Can and Nbenth	Not prec	Prec	FALSE	FALSE	WRKY	GO:0003700	WRKY transcription factor-c (AHRD V1 **** Q5DJV3_CAPAN); contains Interpro domain(s) IPR003657 DNA-binding WRKY
Solyc11g010710.1.1	1	1	FM	Can and Nbenth	Not prec	Prec	FALSE	FALSE	AP2	GO:0003677_GO:0006355	AP2-like ethylene-responsive transcription factor At1g16060 (AHRD V1 *-*- AP2L1_ARATH); contains Interpro domain(s) IPR001471 Pathogenesis-related transcriptional factor and ERF, DNA-binding
Solyc10g080690.1.1	1	1	FM	Can and Nbenth	Not prec	Prec	FALSE	TRUE			Patatin-like protein 3 (AHRD V1 ***- B6TPQ5_MAIZE); contains Interpro domain(s) IPR002641 Patatin
Solyc06g075150.2.1	1	1	FM	Can and Nbenth	Not prec	Prec	FALSE	FALSE	ARF		Auxin response factor 16 (AHRD V1 ***- D9IVB4_SOLLC); contains Interpro domain(s) IPR010525 Auxin response factor
Solyc05g009740.1.1	1	1	FM	Can and Nbenth	Not prec	Prec	FALSE	TRUE			Nbs-lrr, resistance protein
Solyc01g008110.2.1	1	1	FM	Can and Nbenth	Not prec	Prec	FALSE	TRUE			Cytochrome P450
Solyc12g010910.1.1	1	1	FM	Can and Nbenth	Not prec	Prec	FALSE	TRUE			Lipase (Fragment) (AHRD V1 ***- Q9ZTW1_DIACA); contains Interpro domain(s) IPR002921 Lipase, class 3
Solyc07g047960.2.1	1	1	FM	Can and Nbenth	Not prec	Prec	FALSE	FALSE	WRKY	GO:0003700	WRKY transcription factor 2 (AHRD V1 **** C9DHZ1_9ROSI); contains Interpro domain(s) IPR003657 DNA-binding WRKY
Solyc08g076670.2.1	1	1	FM	Can and Nbenth	Not prec	Prec	FALSE	TRUE			Transmembrane protein 41B (AHRD V1 **-- TM41B_HUMAN); contains Interpro domain(s) IPR015414 SNARE associated Golgi protein
Solyc05g005150.1.1	1	1	FM	Can and Nbenth	Not prec	Prec	FALSE	FALSE			F-box/Kelch repeat-containing F-box family protein (AHRD V1 ***- C4PVT9_ARATH); contains Interpro domain(s) IPR015915 Kelch-type beta propeller
Solyc03g097940.2.1	1	1	FM	Can and Nbenth	Not prec	Prec	FALSE	FALSE			Potassium channel (AHRD V1 **** O04242_MAIZE); contains Interpro domain(s) IPR002110 Ankyrin
Solyc08g005560.2.1	1	1	FM	Can and Nbenth	Not prec	Prec	FALSE	FALSE			Binding protein (AHRD V1 ***- D7MGU4_ARALY)
Solyc04g007340.2.1	1	1	FM	Can and Nbenth	Not prec	Prec	FALSE	FALSE			Unknown Protein (AHRD V1); contains Interpro domain(s) IPR012438 Protein of unknown function DUF1639
Solyc04g009440.2.1	1	1	FM	Can and Nbenth	Not prec	Prec	FALSE	FALSE	NAC	GO:0003700	NAC domain protein (AHRD V1 ***- Q6RH27_SOLLC); contains Interpro domain(s) IPR003441 No apical meristem (NAM) protein
Solyc07g007330.1.1	1	1	FM	Can and Nbenth	Not prec	Prec	FALSE	FALSE			Serine-rich protein (AHRD V1 ***- A1YMW6_BRACM)
Solyc01g079480.2.1	1	1	FM	Can and Nbenth	Not prec	Prec	FALSE	TRUE	bZIP	GO:0003700	BZIP transcription factor (AHRD V1 **-* Q1HW69_CAPAN); contains Interpro domain(s) IPR011616 bZIP transcription factor, bZIP-1
Solyc02g086180.2.1	1	1	FM	Can and Nbenth	Not prec	Prec	FALSE	FALSE			Sterol C-5 desaturase (AHRD V1 **** D7FW86_ECTSI); contains Interpro domain(s) IPR006694 Fatty acid hydroxylase
Solyc10g085740.1.1	1	1	FM	Can and Nbenth	Not prec	Prec	FALSE	FALSE			GDSL esterase/lipase At5g03820 (AHRD V1 ***- GDL73_ARATH); contains Interpro domain(s) IPR001087 Lipase, GDSL
Solyc12g008840.1.1	1	1	FM	Can and Nbenth	Not prec	Prec	FALSE	FALSE			Beta-galactosidase (AHRD V1 ***- O81100_SOLLC); contains Interpro domain(s) IPR001944 Glycoside hydrolase, family 35
Solyc03g120330.1.1	1	1	FM	Can and Nbenth	Not prec	Prec	FALSE	FALSE			Kelch repeat-containing F-box family protein (AHRD V1 ***- D7KDI0_ARALY); contains Interpro domain(s) IPR015915 Kelch-type beta propeller
Solyc01g110570.2.1	1	1	FM	Can and Nbenth	Not prec	Prec	FALSE	TRUE			Auxin-induced SAUR-like protein (AHRD V1 **-- Q8S349_CAPAN); contains Interpro domain(s) IPR003676 Auxin responsive SAUR protein
Solyc01g105280.2.1	1	1	FM	Can and Nbenth	Not prec	Prec	FALSE	FALSE			Protein phosphatase 2C-like (AHRD V1 ***- A2Q6E4_MEDTR); contains Interpro domain(s) IPR015655 Protein phosphatase 2C
Solyc08g075640.2.1	1	1	FM	Can and Nbenth	Not prec	Prec	FALSE	TRUE			Cc-nbs-lrr, resistance protein
Solyc08g078090.1.1	1	1	FM	Can and Nbenth	Not prec	Prec	FALSE	FALSE			Lipase (Fragment) (AHRD V1 ***- Q9ZTW1_DIACA); contains Interpro domain(s) IPR002921 Lipase, class 3
Solyc10g078920.1.1	1	1	FM	Can and Nbenth	Not prec	Prec	FALSE	FALSE			Thioredoxin-like 5 (AHRD V1 ***- A6N1I7_ORYSI); contains Interpro domain(s) IPR013766 Thioredoxin domain
Solyc01g094970.2.1	1	1	FM	Can and Nbenth	Not prec	Prec	FALSE	FALSE			Glycoside hydrolase family 28 protein/polygalacturonase family protein (AHRD V1 **-- Q1PF10_ARATH); contains Interpro domain(s) IPR012334 Pectin lyase fold
Solyc04g076630.2.1	1	1	FM	Can and Nbenth	Not prec	Prec	FALSE	FALSE			Rhamnogalacturonate lyase (AHRD V1 **** A3XLZ2_LEEBM); contains Interpro domain(s) IPR010325 Rhamnogalacturonate lyase
Solyc01g096080.2.1	1	1	FM	Can and Nbenth	Not prec	Prec	FALSE	FALSE			Unknown Protein (AHRD V1)
Solyc01g096100.2.1	1	1	FM	Can and Nbenth	Not prec	Prec	FALSE	FALSE			AT2G46550 protein (Fragment) (AHRD V1 ***- B9DHY8_ARATH)
Solyc03g121350.2.1	1	1	FM	Can and Nbenth	Not prec	Prec	FALSE	FALSE			Anoctamin-like protein (AHRD V1 ***- D0MXY8_PHYIN); contains Interpro domain(s) IPR007632 Protein of unknown function DUF590
Solyc04g081240.2.1	1	1	FM	Can and Nbenth	Not prec	Prec	FALSE	FALSE	ARF		Auxin response factor 5 (AHRD V1 ***- D9IVB5_SOLLC); contains Interpro domain(s) IPR010525 Auxin response factor
Solyc04g050960.2.1	1	1	FM	Can and Nbenth	Not prec	Prec	FALSE	FALSE			Chromatin remodeling complex subunit (AHRD V1 *--- B9N3S4_POPTR); contains Interpro domain(s) IPR012287 Homeodomain-related
Solyc11g011310.1.1	1	1	FM	Can and Nbenth	Not prec	Prec	FALSE	TRUE			Rhamnogalacturonate lyase (AHRD V1 ***- A3XLZ2_LEEBM); contains Interpro domain(s) IPR010325 Rhamnogalacturonate lyase
Solyc03g033330.2.1	1	1	FM	Can and Nbenth	Not prec	Prec	FALSE	FALSE			RING finger protein 44 (AHRD V1 *-*- RNF44_MOUSE); contains Interpro domain(s) IPR018957 Zinc finger, C3HC4 RING-type
Solyc07g055270.1.1	1	1	FM	Can and Nbenth	Not prec	Prec	FALSE	TRUE			Unknown Protein (AHRD V1)
Solyc04g077860.2.1	1	1	FM	Can and Nbenth	Not prec	Prec	FALSE	FALSE			Hydrolase alpha/beta fold family protein expressed (AHRD V1 **** Q10J20_ORYSJ); contains Interpro domain(s) IPR000073 Alpha/beta hydrolase fold-1
Solyc06g073730.1.1	1	1	FM	Can and Nbenth	Not prec	Prec	FALSE	FALSE	EIL	GO:0003700	Ethylene insensitive 3 class transcription factor (AHRD V1 **** D5L146_MALDO); contains Interpro domain(s) IPR006957 Ethylene insensitive 3
Solyc01g110350.2.1	1	1	FM	Can and Nbenth	Not prec	Prec	FALSE	TRUE			Unknown Protein (AHRD V1)
Solyc02g063450.2.1	1	1	FM	Can and Nbenth	Not prec	Prec	FALSE	FALSE			Hypothetical YFW family protein 5 (AHRD V1 *--- Q5AP84_CANAL); contains Interpro domain(s) IPR009836 Protein of unknown function DUF1399
Solyc05g010590.2.1	1	1	FM	Can and Nbenth	Not prec	Prec	FALSE	TRUE			WPP domain-interacting tail-anchored protein 2 (AHRD V1 ***- WIT2_ARATH)
Solyc03g117600.2.1	1	1	FM	Can and Nbenth	Not prec	Prec	FALSE	FALSE			Hydroxycinnamoyl-CoA shikimate/quinate hydroxycinnamoyltransferase (AHRD V1 **-* A4ZKI0_COFAR); contains Interpro domain(s) IPR003480 Transferase
Solyc09g074230.2.1	1	1	FM	Can and Nbenth	Prec	Not prec	FALSE	TRUE			Glucose transporter 8 (AHRD V1 **** Q2KKJ3_SOLIN); contains Interpro domain(s) IPR003663 Sugar/inositol transporter
Solyc02g081830.2.1	1	1	FM	Can and Nbenth	Prec	Not prec	FALSE	TRUE			HAD-superfamily hydrolase (AHRD V1 ***- D5A3P4_SPIPL); contains Interpro domain(s) IPR011949 HAD-superfamily hydrolase, subfamily IA, REG-2-like
Solyc07g055210.2.1	1	1	FM	Can and Nbenth	Prec	Not prec	FALSE	TRUE			Aspartate aminotransferase (AHRD V1 ***- B9SW33_RICCO); contains Interpro domain(s) IPR000796 Aspartate/other aminotransferase
Solyc04g072760.2.1	1	1	FM	Can and Nbenth	Prec	Not prec	FALSE	TRUE			High affinity sulfate transporter 2 (AHRD V1 **** SUT2_STYHA); contains Interpro domain(s) IPR001902 Sulphate anion transporter
Solyc07g006500.2.1	1	1	FM	Can and Nbenth	Prec	Not prec	FALSE	FALSE			Alpha alpha-trehalose-phosphate synthase (UDP-forming) (AHRD V1 **** D2REU5_ARCPA); contains Interpro domain(s) IPR001830 Glycosyl transferase, family 20
Solyc09g098290.2.1	1	1	FM	Can and Nbenth	Prec	Not prec	FALSE	TRUE			Receptor like kinase, RLK
Solyc04g076960.2.1	1	1	FM	Can and Nbenth	Prec	Not prec	FALSE	FALSE			Sucrose transporter (AHRD V1 **** Q9FVJ6_SOLLC); contains Interpro domain(s) IPR005989 Sucrose/H+ symporter, plant
Solyc04g015560.2.1	1	1	FM	Can and Nbenth	Prec	Not prec	FALSE	FALSE			Beta-D-glucosidase (AHRD V1 ***- Q7XAS3_GOSHI); contains Interpro domain(s) IPR001764 Glycoside hydrolase, family 3, N-terminal
Solyc08g083050.1.1	1	1	FM	Can and Nbenth	Prec	Not prec	FALSE	TRUE			Unknown Protein (AHRD V1)
Solyc07g008240.2.1	1	1	FM	Can and Nbenth	Prec	Not prec	FALSE	TRUE			Non-symbiotic hemoglobin protein (AHRD V1 ***- Q4VIX3_GOSHI); contains Interpro domain(s) IPR001032 Leghaemoglobin
Solyc04g009810.2.1	1	1	FM	Can and Nbenth	Prec	Not prec	FALSE	TRUE			Pelota homolog (AHRD V1 ***- C3KIY5_ANOFI); contains Interpro domain(s) IPR004405 Probable translation factor pelota
Solyc01g079880.2.1	1	1	FM	Can and Nbenth	Prec	Not prec	FALSE	TRUE			Asparagine synthetase (AHRD V1 *--- Q9ZST6_ARATH)
Solyc02g080220.2.1	1	1	FM	Can and Nbenth	Prec	Not prec	FALSE	TRUE			Pectinesterase (AHRD V1 ***- B9RXQ4_RICCO); contains Interpro domain(s) IPR000070 Pectinesterase, catalytic
Solyc03g117300.2.1	1	1	FM	Can and Nbenth	Prec	Not prec	FALSE	FALSE			Nodulin-like protein (AHRD V1 ***- Q8H6R3_PONTR); contains Interpro domain(s) IPR010658 Nodulin-like
Solyc06g084380.2.1	1	1	FM	Can and Nbenth	Prec	Not prec	FALSE	TRUE			Oxidoreductase 2OG-Fe oxygenase family protein (AHRD V1 ***- B6ST02_MAIZE); contains Interpro domain(s) IPR005123 Oxoglutarate and iron-dependent oxygenase
Solyc12g005020.1.1	1	1	FM	Can and Nbenth	Prec	Not prec	FALSE	TRUE			Ring H2 finger protein (AHRD V1 *-*- D9ZHD8_HYPPE); contains Interpro domain(s) IPR018957 Zinc finger, C3HC4 RING-type
Solyc10g079670.1.1	1	1	FM	Can and Nbenth	Prec	Not prec	FALSE	FALSE			Ribonuclease Z (AHRD V1 ***- C1GH70_PARBD); contains Interpro domain(s) IPR001279 Beta-lactamase-like
Solyc08g066100.2.1	1	1	FM	Can and Nbenth	Prec	Not prec	FALSE	TRUE			Phosphofructokinase family protein (AHRD V1 ***- D7MLU4_ARALY); contains Interpro domain(s) IPR012004 Pyrophosphate-dependent phosphofructokinase TP0108
Solyc11g010950.1.1	1	1	FM	Can and Nbenth	Prec	Not prec	FALSE	TRUE			Elongator complex protein 4 (AHRD V1 ***- ELP4_BOVIN); contains Interpro domain(s) IPR008728 Elongator complex protein 4
Solyc08g080570.2.1	1	1	FM	Can and Nbenth	Prec	Not prec	FALSE	FALSE			UDP-glucose 4-epimerase (AHRD V1 **** B0M3E8_PEA); contains Interpro domain(s) IPR005886 UDP-glucose 4-epimerase
Solyc04g058180.2.1	1	1	FM	Can and Nbenth	Prec	Not prec	FALSE	TRUE			Dehydration-responsive family protein (AHRD V1 **-- D7LDR4_ARALY); contains Interpro domain(s) IPR004159 Protein of unknown function DUF248, methyltransferase putative
Solyc01g068360.2.1	1	1	FM	Can and Nbenth	Prec	Not prec	FALSE	TRUE			Receptor like kinase, RLK
Solyc03g119530.2.1	1	1	FM	Can and Nbenth	Prec	Not prec	FALSE	FALSE	LBD		LOB domain protein 42 (AHRD V1 ***- D7KWD0_ARALY); contains Interpro domain(s) IPR004883 Lateral organ boundaries, LOB
Solyc03g117980.2.1	1	1	FM	Can and Nbenth	Prec	Not prec	FALSE	TRUE			Respiratory burst oxidase-like protein (AHRD V1 **** C1IHQ9_9ROSI); contains Interpro domain(s) IPR013121 Ferric reductase, NAD binding
Solyc03g120830.2.1	1	1	FM	Can and Nbenth	Prec	Not prec	FALSE	FALSE			F5F19.22 protein (Fragment) (AHRD V1 ***- Q9ZU10_ARATH)
Solyc01g067510.2.1	1	1	FM	Can and Nbenth	Prec	Not prec	FALSE	TRUE			Receptor-like kinase (AHRD V1 **** A7VM36_MARPO); contains Interpro domain(s) IPR002290 Serine/threonine protein kinase
Solyc03g098780.1.1	1	1	FM	Can and Nbenth	Prec	Not prec	FALSE	FALSE			Kunitz-type protease inhibitor (AHRD V1 **** Q3S488_SOLTU); contains Interpro domain(s) IPR002160 Proteinase inhibitor I3, Kunitz legume
Solyc06g036110.1.1	1	1	FM	Can and Nbenth	Prec	Not prec	FALSE	FALSE			C2 domain-containing protein (AHRD V1 *--- Q5DVL6_HORVD); contains Interpro domain(s) IPR018029 C2 membrane targeting protein
Solyc02g090730.2.1	1	1	FM	Can and Nbenth	Prec	Not prec	FALSE	FALSE			Cell number regulator 1 (AHRD V1 **-- B6TZ45_MAIZE); contains Interpro domain(s) IPR006461 Protein of unknown function Cys-rich
Solyc01g097540.2.1	1	1	FM	Can and Nbenth	Prec	Not prec	FALSE	FALSE			Annexin 3 (AHRD V1 ***- A9X4R3_BRAJU); contains Interpro domain(s) IPR015472 Annexin like protein IPR001464 Annexin
Solyc01g007890.1.1	1	1	FM	Can and Nbenth	Prec	Not prec	FALSE	TRUE			Unknown Protein (AHRD V1)
Solyc11g012130.1.1	1	1	FM	Can and Nbenth	Prec	Not prec	FALSE	FALSE			Blue copper protein (AHRD V1 *--- B6U7P6_MAIZE); contains Interpro domain(s) IPR008972 Cupredoxin
Solyc04g016250.2.1	1	1	FM	Can and Nbenth	Prec	Not prec	FALSE	FALSE			Mitochondrial glycoprotein expressed (AHRD V1 *-*- Q2RAS2_ORYSJ); contains Interpro domain(s) IPR003428 Mitochondrial glycoprotein
Solyc04g049920.2.1	1	1	FM	Can and Nbenth	Prec	Not prec	FALSE	TRUE			RNA binding protein-like (AHRD V1 **-- Q8LFQ5_ARATH); contains Interpro domain(s) IPR000504 RNA recognition motif, RNP-1
Solyc07g062810.2.1	1	1	FM	Can and Nbenth	Prec	Not prec	FALSE	TRUE			Branched-chain amino acid aminotransferase-like (AHRD V1 **** Q5NAM3_ORYSJ); contains Interpro domain(s) IPR001544 Aminotransferase, class IV
Solyc12g096110.1.1	1	1	FM	Can and Nbenth	Prec	Not prec	FALSE	FALSE			Protein BREVIS RADIX (AHRD V1 ***- BRX_ARATH); contains Interpro domain(s) IPR013591 Disease resistance/zinc finger/chromosome condensation-like region
Solyc06g065630.2.1	1	1	FM	Can and Nbenth	Prec	Not prec	FALSE	TRUE			Monooxygenase (AHRD V1 **** B5GNT3_STRCL); contains Interpro domain(s) IPR000103 Pyridine nucleotide-disulphide oxidoreductase, class-II
Solyc10g075170.1.1	1	1	FM	Can and Nbenth	Prec	Not prec	FALSE	TRUE			Aspartate aminotransferase (AHRD V1 ***- B9HDA1_POPTR); contains Interpro domain(s) IPR000796 Aspartate/other aminotransferase
Solyc12g007160.1.1	1	1	FM	Can and Nbenth	Prec	Prec	TRUE	TRUE			Protein ABIL1 (AHRD V1 *--- B6TCZ2_MAIZE)
Solyc07g066230.2.1	1	1	FM	Can and Nbenth	Prec	Prec	TRUE	TRUE			Receptor like kinase, RLK
Solyc00g050430.2.1	1	1	FM	Can and Nbenth	Prec	Prec	TRUE	TRUE	bHLH		BHLH transcription factor (AHRD V1 *-*- A9YWR2_MEDTR); contains Interpro domain(s) IPR011598 Helix-loop-helix DNA-binding
Solyc04g080620.2.1	1	1	FM	Can and Nbenth	Prec	Prec	TRUE	TRUE			Mannan endo-1 4-beta-mannosidase (AHRD V1 ***- A8FDC6_BACP2); contains Interpro domain(s) IPR013781 Glycoside hydrolase, subgroup, catalytic core
Solyc02g090400.2.1	1	1	FM	Can and Nbenth	Prec	Prec	TRUE	TRUE	G2-like	GO:0003700	Myb family transcription factor (AHRD V1 **-* D7LQI3_ARALY); contains Interpro domain(s) IPR006447 Myb-like DNA-binding region, SHAQKYF class
Solyc06g074030.1.1	1	1	FM	Can and Nbenth	Prec	Prec	TRUE	TRUE			CCR4-NOT transcription complex subunit 7 (AHRD V1 ***- B4FG48_MAIZE); contains Interpro domain(s) IPR006941 Ribonuclease CAF1
Solyc01g105000.2.1	1	1	FM	Can and Nbenth	Prec	Prec	TRUE	TRUE			Copper chaperone (AHRD V1 *--- D3GC04_9ROSI); contains Interpro domain(s) IPR006121 Heavy metal transport/detoxification protein
Solyc10g005210.2.1	1	1	FM	Can and Nbenth	Prec	Prec	TRUE	TRUE			DNA-3-methyladenine glycosylase I (AHRD V1 ***- B4FWT0_MAIZE); contains Interpro domain(s) IPR005019 Methyladenine glycosylase
Solyc02g083250.2.1	1	1	FM	Can and Nbenth	Prec	Prec	TRUE	FALSE			Cellular retinaldehyde-binding/triple function C-terminal (AHRD V1 **-- B6SN40_MAIZE); contains Interpro domain(s) IPR001251 Cellular retinaldehyde-binding/triple function, C-terminal
Solyc02g081670.1.1	1	1	FM	Can and Nbenth	Prec	Prec	TRUE	TRUE			Fimbriata (Fragment) (AHRD V1 **-- Q6QVW9_MIMLE); contains Interpro domain(s) IPR001810 Cyclin-like F-box
Solyc03g121060.2.1	1	1	FM	Can and Nbenth	Prec	Prec	TRUE	TRUE		GO:0003700	Auxin response factor 9 (AHRD V1 *-** ARFI_ARATH); contains Interpro domain(s) IPR003311 AUX/IAA protein
Solyc01g112000.2.1	1	1	FM	Can and Nbenth	Prec	Prec	TRUE	TRUE			Expansin-like protein (AHRD V1 ***- A7X331_SOLLC); contains Interpro domain(s) IPR007112 Expansin 45, endoglucanase-like IPR007117 Pollen allergen/expansin, C-terminal
Solyc05g005810.2.1	1	1	FM	Can and Nbenth	Prec	Prec	TRUE	FALSE			Uncharacterized basic helix-loop-helix protein At1g06150 (AHRD V1 *-*- Y1615_ARATH)
Solyc05g015750.2.1	1	1	FM	Can and Nbenth	Prec	Prec	TRUE	FALSE	MIKC	GO:0003700	Transcription factor MADS-box 2 (AHRD V1 **** D5HSY6_9ROSA); contains Interpro domain(s) IPR002100 Transcription factor, MADS-box IPR002487 Transcription factor, K-box
Solyc03g111690.2.1	1	1	FM	Can and Nbenth	Prec	Prec	TRUE	TRUE			Pectate lyase (AHRD V1 **** Q2Z1Y4_PRUMU); contains Interpro domain(s) IPR002022 Pectate lyase/Amb allergen
Solyc06g073190.2.1	1	1	FM	Can and Nbenth	Prec	Prec	TRUE	TRUE			Fructokinase-like (AHRD V1 **-* Q307Z3_SOLTU); contains Interpro domain(s) IPR002173 Carbohydrate/puine kinase, PfkB, conserved site
Solyc02g090220.2.1	1	1	FM	Can and Nbenth	Prec	Prec	TRUE	FALSE	Dof	GO:0003700	Dof zinc finger protein (AHRD V1 *-*- Q9SXG5_ORYSA); contains Interpro domain(s) IPR003851 Zinc finger, Dof-type
Solyc05g049980.2.1	1	1	FM	Can and Nbenth	Prec	Prec	TRUE	FALSE			Glycoside hydrolase family 28 protein/polygalacturonase family protein (AHRD V1 **-- Q1PF10_ARATH); contains Interpro domain(s) IPR012334 Pectin lyase fold
Solyc12g009300.1.1	1	1	FM	Can and Nbenth	Prec	Prec	TRUE	FALSE			Sucrose synthase (AHRD V1 **** O82693_SOLLC); contains Interpro domain(s) IPR012820 Sucrose synthase, plants and cyanobacteria IPR000368 Sucrose synthase
Solyc09g008830.2.1	1	1	FM	Can and Nbenth	Prec	Prec	TRUE	FALSE			Os01g0318400 protein (Fragment) (AHRD V1 *-*- Q7XXQ7_ORYSJ)
Solyc02g068070.2.1	1	1	FM	Can and Nbenth	Prec	Prec	TRUE	TRUE			Lipase (AHRD V1 **** Q1XBG1_RICCO); contains Interpro domain(s) IPR006693 AB-hydrolase associated lipase region
Solyc01g107390.2.1	1	1	FM	Can and Nbenth	Prec	Prec	TRUE	TRUE			Auxin-responsive GH3 product (AHRD V1 ***- Q05680_SOYBN); contains Interpro domain(s) IPR004993 GH3 auxin-responsive promoter
Solyc11g012450.1.1	1	1	FM	Can and Nbenth	Prec	Prec	TRUE	FALSE			Predicted transporter (AHRD V1 ***- Q2TZC8_ASPOR); contains Interpro domain(s) IPR003663 Sugar/inositol transporter
Solyc03g064030.2.1	1	1	FM	Can and Nbenth	Prec	Prec	TRUE	FALSE			C4orf29 homolog (AHRD V1 **-- B5X1A7_SALSA); contains Interpro domain(s) IPR019149 Protein of unknown function DUF2048
Solyc05g055880.2.1	1	1	FM	Can and Nbenth	Prec	Prec	TRUE	TRUE			Nucleolar protein 5 (AHRD V1 ***- Q6P364_XENTR); contains Interpro domain(s) IPR002687 Pre-mRNA processing ribonucleoprotein, binding region
Solyc09g007260.2.1	1	1	FM	Can and Nbenth	Prec	Prec	TRUE	TRUE	AP2	GO:0003677	AP2-like ethylene-responsive transcription factor At1g79700 (AHRD V1 *--- AP2L3_ARATH); contains Interpro domain(s) IPR001471 Pathogenesis-related transcriptional factor and ERF, DNA-binding
Solyc08g078670.2.1	1	1	FM	Can and Nbenth	Prec	Prec	TRUE	FALSE			Aspartyl protease (AHRD V1 **-- B8YIB7_MIRJA); contains Interpro domain(s) IPR001461 Peptidase A1
Solyc02g089200.2.1	1	1	FM	Can and Nbenth	Prec	Prec	TRUE	TRUE	MIKC	GO:0003700	MADS-box transcription factor (AHRD V1 **** Q3KSZ0_PRUDU); contains Interpro domain(s) IPR002100 Transcription factor, MADS-box IPR002487 Transcription factor, K-box
Solyc03g111310.2.1	1	1	FM	Can and Nbenth	Prec	Prec	TRUE	FALSE			AKIN gamma (AHRD V1 **-- Q7XYY0_MEDTR); contains Interpro domain(s) IPR000644 Cystathionine beta-synthase, core
Solyc04g083160.1.1	1	1	FM	Can and Nbenth	Prec	Prec	TRUE	FALSE			cytochrome P450
Solyc10g049600.1.1	1	1	FM	Can and Nbenth	Prec	Prec	TRUE	FALSE			Progesterone 5-beta-reductase (AHRD V1 ***- D6NIX2_ATRBE); contains Interpro domain(s) IPR016040 NAD(P)-binding domain
Solyc01g100370.2.1	1	1	FM	Can and Nbenth	Prec	Prec	TRUE	TRUE			Universal stress protein (AHRD V1 ***- B6SNQ1_MAIZE); contains Interpro domain(s) IPR006016 UspA
Solyc06g076270.2.1	1	1	FM	Can and Nbenth	Prec	Prec	TRUE	FALSE	MYB_related	GO:0003677	Telomere repeat-binding protein 5 (AHRD V1 *-*- TRP5_ARATH); contains Interpro domain(s) IPR001005 SANT, DNA-binding
Solyc04g082030.1.1	1	1	FM	Can and Nbenth	Prec	Prec	TRUE	FALSE			Ornithine decarboxylase (AHRD V1 **** Q9SXF3_TOBAC); contains Interpro domain(s) IPR002433 Ornithine decarboxylase
Solyc10g047030.1.1	1	1	FM	Can and Nbenth	Prec	Prec	TRUE	TRUE			Beta-xylosidase 4 (AHRD V1 **** D7MRV5_ARALY); contains Interpro domain(s) IPR001764 Glycoside hydrolase, family 3, N-terminal
Solyc09g075210.2.1	1	1	FM	Can and Nbenth	Prec	Prec	TRUE	FALSE			Late embryogenesis abundant protein 5 (AHRD V1 ***- Q1HGG0_9ROSI); contains Interpro domain(s) IPR004926 Late embryogenesis abundant protein 3
Solyc04g077050.2.1	1	1	FM	Can and Nbenth	Prec	Prec	TRUE	TRUE			Amino acid permease 6 (AHRD V1 **** Q7Y076_BRANA); contains Interpro domain(s) IPR013057 Amino acid transporter, transmembrane
Solyc07g053220.1.1	1	1	FM	Can and Nbenth	Prec	Prec	TRUE	FALSE			Receptor-like protein kinase (AHRD V1 ***- Q9LLN5_ORYSA); contains Interpro domain(s) IPR002290 Serine/threonine protein kinase
Solyc07g006380.2.1	1	1	FM	Can and Nbenth	Prec	Prec	TRUE	FALSE			Defensin-like protein (AHRD V1 ***- Q948T3_PYRPY); contains Interpro domain(s) IPR008177 Gamma Purothionin
Solyc11g073110.1.1	1	1	FM	Can and Nbenth	Prec	Prec	TRUE	FALSE			Auxin-regulated protein (AHRD V1 ***- Q945F5_SOLLC); contains Interpro domain(s) IPR010369 Protein of unknown function DUF966
Solyc10g080880.1.1	1	1	FM	Can and Nbenth	Prec	Prec	TRUE	TRUE			Auxin efflux carrier (AHRD V1 ***- D6RT09_SOLLC); contains Interpro domain(s) IPR014024 Auxin efflux carrier, subgroup
Solyc03g114840.2.1	1	1	FM	Can and Nbenth	Prec	Prec	TRUE	TRUE	MIKC	GO:0003700	MADS box transcription factor 11 (AHRD V1 **** D9IFM5_ONCHC); contains Interpro domain(s) IPR002100 Transcription factor, MADS-box IPR002487 Transcription factor, K-box
Solyc12g006530.1.1	1	1	FM	Can and Nbenth	Prec	Prec	TRUE	FALSE			Cycloartenol synthase (AHRD V1 ***- D7LA92_ARALY); contains Interpro domain(s) IPR018333 Squalene cyclase
Solyc03g115870.2.1	1	1	FM	Can and Nbenth	Prec	Prec	TRUE	TRUE			Thioredoxin 2 (AHRD V1 ***- Q5ZF47_PLAMJ); contains Interpro domain(s) IPR015467 Thioredoxin, core
Solyc08g081480.2.1	1	1	FM	Can and Nbenth	Prec	Prec	TRUE	TRUE			Polygalacturonase-like protein (AHRD V1 **-- Q84LI7_FRAAN); contains Interpro domain(s) IPR012334 Pectin lyase fold
Solyc07g054790.1.1	1	1	FM	Can and Nbenth	Prec	Prec	TRUE	TRUE			Wound induced protein (AHRD V1 ***- B6U0P9_MAIZE)
Solyc02g080230.2.1	1	1	FM	Can and Nbenth	Prec	Prec	TRUE	FALSE			Rop-interactive crib motif-containing protein 1 (AHRD V1 *--- D7LGA6_ARALY); contains Interpro domain(s) IPR000095 PAK-box/P21-Rho-binding
Solyc02g094400.2.1	1	1	FM	Can and Nbenth	Prec	Prec	TRUE	TRUE			Glycerophosphodiester phosphodiesterase gde1 (AHRD V1 ***- B6JW52_SCHJY); contains Interpro domain(s) IPR004129 Glycerophosphoryl diester phosphodiesterase
Solyc01g104950.2.1	1	1	FM	Can and Nbenth	Prec	Prec	TRUE	TRUE			Alpha-L-arabinofuranosidase/beta-D-xylosidase (AHRD V1 **** D9D7L0_MALDO); contains Interpro domain(s) IPR001764 Glycoside hydrolase, family 3, N-terminal
Solyc04g077830.2.1	1	1	FM	Can and Nbenth	Prec	Prec	TRUE	TRUE			Calmodulin-binding protein (AHRD V1 **-* Q7XJB9_ORYSI); contains Interpro domain(s) IPR011990 Tetratricopeptide-like helical
Solyc02g065160.1.1	1	1	FM	Nbenth	Not prec	Not prec	FALSE	FALSE			SWIB/MDM2 domain containing protein (AHRD V1 *-*- B6SRJ0_MAIZE); contains Interpro domain(s) IPR019835 SWIB domain
Solyc03g121790.2.1	1	1	FM	Nbenth	Not prec	Not prec	FALSE	TRUE			EPIDERMAL PATTERNING FACTOR-like protein 3 (AHRD V1 ***- EPFL3_ARATH)
Solyc11g031970.1.1	1	1	FM	Nbenth	Not prec	Not prec	FALSE	TRUE			Unknown Protein (AHRD V1); contains Interpro domain(s) IPR002482 Peptidoglycan-binding Lysin subgroup
Solyc04g076990.2.1	1	1	FM	Nbenth	Not prec	Not prec	FALSE	TRUE			Receptor like kinase, RLK
Solyc03g058330.2.1	1	1	FM	Nbenth	Not prec	Not prec	FALSE	FALSE			Unknown Protein (AHRD V1)
Solyc10g017490.1.1	1	1	FM	Nbenth	Not prec	Not prec	FALSE	TRUE			Kinase family protein (AHRD V1 **** D7KBF8_ARALY); contains Interpro domain(s) IPR002290 Serine/threonine protein kinase
Solyc10g012210.1.1	1	1	FM	Nbenth	Not prec	Not prec	FALSE	TRUE			ARID/BRIGHT DNA-binding domain-containing protein/ELM2 domain-containing protein/Myb-like DNA-binding domain-containing protein (AHRD V1 *--- Q1PEA0_ARATH); contains Interpro domain(s) IPR000949 ELM2
Solyc03g095780.1.1	1	1	FM	Nbenth	Not prec	Not prec	FALSE	TRUE			Abscisic acid receptor PYL6 (AHRD V1 **-* PYL6_ARATH); contains Interpro domain(s) IPR019587 Polyketide cyclase/dehydrase
Solyc01g006540.2.1	1	1	FM	Nbenth	Not prec	Not prec	FALSE	TRUE			Lipoxygenase (AHRD V1 **** Q96573_SOLLC); contains Interpro domain(s) IPR001246 Lipoxygenase, plant
Solyc03g114910.2.1	1	1	FM	Nbenth	Not prec	Not prec	FALSE	TRUE			Ch-cobra (AHRD V1 ***- B7S746_CUNLA); contains Interpro domain(s) IPR017391 COBRA-like
Solyc10g038080.1.1	1	1	FM	Nbenth	Not prec	Not prec	FALSE	TRUE			Shikimate dehydrogenase (AHRD V1 ***- B6TSW1_MAIZE); contains Interpro domain(s) IPR001381 Dehydroquinase class I
Solyc02g038740.2.1	1	1	FM	Nbenth	Not prec	Not prec	FALSE	TRUE			3-hydroxy-3-methylglutaryl coenzyme A reductase (AHRD V1 **** Q9FS01_SOLTU); contains Interpro domain(s) IPR004554 Hydroxymethylglutaryl-CoA reductase, class I, catalytic
Solyc11g073130.1.1	1	1	FM	Nbenth	Not prec	Not prec	FALSE	FALSE			Protein tyrosine phosphatase 1B (AHRD V1 *-*- D9IVF2_STRIE); contains Interpro domain(s) IPR007482 Protein-tyrosine phosphatase-like, PTPLA
Solyc04g076820.1.1	1	1	FM	Nbenth	Not prec	Not prec	FALSE	FALSE			Octicosapeptide/Phox/Bem1p domain-containing protein (AHRD V1 *--- D7MPG4_ARALY); contains Interpro domain(s) IPR000270 Octicosapeptide/Phox/Bem1p
Solyc02g080510.1.1	1	1	FM	Nbenth	Not prec	Not prec	FALSE	FALSE			Arabidopsis thaliana genomic DNA chromosome 5 P1 clone MOK16 (AHRD V1 *-*- Q9LYW2_ARATH); contains Interpro domain(s) IPR007608 Protein of unknown function DUF584
Solyc09g005110.2.1	1	1	FM	Nbenth	Not prec	Not prec	FALSE	TRUE			Pyruvate decarboxylase 1 (AHRD V1 **** Q84V95_LOTCO); contains Interpro domain(s) IPR012110 Pyruvate decarboxylase/indolepyruvate decarboxylase
Solyc12g100180.1.1	1	1	FM	Nbenth	Not prec	Not prec	FALSE	FALSE			ATP-binding cassette transporter (AHRD V1 ***- D8RL93_SELML); contains Interpro domain(s) IPR013525 ABC-2 type transporter
Solyc10g052470.1.1	1	1	FM	Nbenth	Not prec	Not prec	FALSE	TRUE	MYB_related	GO:0003700	Myb family transcription factor (Fragment) (AHRD V1 **** D7KSM0_ARALY); contains Interpro domain(s) IPR017884 SANT, eukarya
Solyc02g093890.1.1	1	1	FM	Nbenth	Not prec	Not prec	FALSE	FALSE			Unknown Protein (AHRD V1)
Solyc03g113060.2.1	1	1	FM	Nbenth	Not prec	Not prec	FALSE	TRUE			ATP-binding cassette transporter (AHRD V1 ***- D8RFW2_SELML); contains Interpro domain(s) IPR003439 ABC transporter-like
Solyc01g088430.2.1	1	1	FM	Nbenth	Not prec	Not prec	FALSE	TRUE			CER1 (AHRD V1 **-- B6TFH3_MAIZE); contains Interpro domain(s) IPR006694 Fatty acid hydroxylase
Solyc08g036570.1.1	1	1	FM	Nbenth	Not prec	Not prec	FALSE	TRUE			Glutaredoxin (AHRD V1 **** B9GF65_POPTR); contains Interpro domain(s) IPR011905 Glutaredoxin-like, plant II
Solyc09g075870.1.1	1	1	FM	Nbenth	Not prec	Not prec	FALSE	FALSE			Lipoxygenase (AHRD V1 **** B9RSQ2_RICCO); contains Interpro domain(s) IPR001246 Lipoxygenase, plant
Solyc10g008400.1.1	1	1	FM	Nbenth	Not prec	Not prec	FALSE	FALSE			RING finger protein 5 (AHRD V1 *--- B6TI40_MAIZE); contains Interpro domain(s) IPR018957 Zinc finger, C3HC4 RING-type
Solyc03g060510.2.1	1	1	FM	Nbenth	Not prec	Not prec	FALSE	FALSE			Membrane protein (AHRD V1 **-- D0BK36_9LACT); contains Interpro domain(s) IPR008537 Protein of unknown function DUF819
Solyc01g010250.2.1	1	1	FM	Nbenth	Not prec	Not prec	FALSE	FALSE			6-phosphogluconolactonase (AHRD V1 ***- B6U0H2_MAIZE); contains Interpro domain(s) IPR005900 6-phosphogluconolactonase
Solyc12g009880.1.1	1	1	FM	Nbenth	Not prec	Not prec	FALSE	FALSE			Serine-rich protein (AHRD V1 ***- Q8L8M8_ARATH)
Solyc11g045530.1.1	1	1	FM	Nbenth	Not prec	Not prec	FALSE	FALSE	LBD		LOB domain protein 4 (AHRD V1 ***- D7KL24_ARALY); contains Interpro domain(s) IPR004883 Lateral organ boundaries, LOB
Solyc12g094440.1.1	1	1	FM	Nbenth	Not prec	Not prec	FALSE	TRUE			High mobility group family (Fragment) (AHRD V1 **-- B9GFX2_POPTR); contains Interpro domain(s) IPR001606 AT-rich interaction region
Solyc07g032740.2.1	1	1	FM	Nbenth	Not prec	Not prec	FALSE	TRUE			Aspartate aminotransferase (AHRD V1 **** A9PHH1_POPTR); contains Interpro domain(s) IPR000796 Aspartate/other aminotransferase
Solyc02g089290.2.1	1	1	FM	Nbenth	Not prec	Not prec	FALSE	TRUE			ATP binding / kinase/ protein serine / threonine kinase (AHRD V1 **** C5DB47_VITVI); contains Interpro domain(s) IPR002290 Serine/threonine protein kinase
Solyc04g025510.2.1	1	1	FM	Nbenth	Not prec	Not prec	FALSE	FALSE			Os02g0194300 protein (Fragment) (AHRD V1 *-*- Q0E347_ORYSJ); contains Interpro domain(s) IPR014854 Nse4
Solyc07g054280.1.1	1	1	FM	Nbenth	Not prec	Not prec	FALSE	TRUE			Aromatic amino acid decarboxylase (AHRD V1 **** D4NUX2_CIMRA); contains Interpro domain(s) IPR010977 Aromatic-L-amino-acid decarboxylase
Solyc02g069910.1.1	1	1	FM	Nbenth	Not prec	Not prec	FALSE	TRUE			Unknown Protein (AHRD V1)
Solyc10g049660.1.1	1	1	FM	Nbenth	Not prec	Not prec	FALSE	FALSE			Transposon protein Mutator sub-class (AHRD V1 **-- B6U1M7_MAIZE); contains Interpro domain(s) IPR004249 NPH3
Solyc01g007190.2.1	1	1	FM	Nbenth	Not prec	Not prec	FALSE	TRUE			Unknown Protein (AHRD V1)
Solyc06g061080.2.1	1	1	FM	Nbenth	Not prec	Not prec	FALSE	TRUE	NAC	GO:0003700	NAC-domain transcription factor (AHRD V1 *-** D3WFN5_WHEAT); contains Interpro domain(s) IPR003441 No apical meristem (NAM) protein
Solyc04g014260.1.1	1	1	FM	Nbenth	Not prec	Not prec	FALSE	FALSE	ZF-HD	GO:0003700	Zinc finger-homeodomain protein 1 (Fragment) (AHRD V1 **-- B0LK17_YUCFI); contains Interpro domain(s) IPR006456 ZF-HD homeobox protein Cys/His-rich dimerisation region
Solyc07g017610.2.1	1	1	FM	Nbenth	Not prec	Not prec	FALSE	FALSE			Saccharopine dehydrogenase (NAD(+) L-glutamate-forming) (AHRD V1 *-** C7PUW7_CHIPD); contains Interpro domain(s) IPR005097 Saccharopine dehydrogenase
Solyc02g084680.2.1	1	1	FM	Nbenth	Not prec	Not prec	FALSE	TRUE	SRS	GO:0003700	Short internodes 2 (AHRD V1 **-- B9MXK1_POPTR); contains Interpro domain(s) IPR007818 Protein of unknown function DUF702
Solyc01g104880.2.1	1	1	FM	Nbenth	Not prec	Not prec	FALSE	TRUE			Phosphatidylserine decarboxylase proenzyme 2 (AHRD V1 **** D3AWK7_POLPA); contains Interpro domain(s) IPR005221 Phosphatidylserine decarboxylase
Solyc04g082420.2.1	1	1	FM	Nbenth	Not prec	Not prec	FALSE	FALSE			BTB/POZ domain-containing protein (AHRD V1 **-- D7LC69_ARALY); contains Interpro domain(s) IPR013089 Kelch related
Solyc03g095310.2.1	1	1	FM	Nbenth	Not prec	Not prec	FALSE	TRUE			Cytochrome P450
Solyc04g007150.2.1	1	1	FM	Nbenth	Not prec	Not prec	FALSE	TRUE			Alpha-glucosidase (AHRD V1 **** Q9LEC9_SOLTU); contains Interpro domain(s) IPR000322 Glycoside hydrolase, family 31
Solyc03g122170.2.1	1	1	FM	Nbenth	Not prec	Not prec	FALSE	FALSE			L-lactate dehydrogenase (AHRD V1 ***- B2WJB5_PYRTR); contains Interpro domain(s) IPR012133 Alpha-hydroxy acid dehydrogenase, FMN-dependent
Solyc07g065970.1.1	1	1	FM	Nbenth	Not prec	Not prec	FALSE	TRUE			Chaperone protein dnaJ 11 (AHRD V1 *-*- B6SS19_MAIZE); contains Interpro domain(s) IPR001623 Heat shock protein DnaJ, N-terminal
Solyc04g050990.2.1	1	1	FM	Nbenth	Not prec	Not prec	FALSE	FALSE			F-box protein PP2-B1 (AHRD V1 ***- PP2B1_ARATH); contains Interpro domain(s) IPR001810 Cyclin-like F-box
Solyc05g007240.1.1	1	1	FM	Nbenth	Not prec	Not prec	FALSE	FALSE			TO109-12 (Fragment) (AHRD V1 *-*- Q3LVG1_TAROF)
Solyc12g013690.1.1	1	1	FM	Nbenth	Not prec	Not prec	FALSE	FALSE			Monooxygenase FAD-binding protein (AHRD V1 **-- Q1B616_MYCSS); contains Interpro domain(s) IPR003042 Aromatic-ring hydroxylase-like
Solyc06g059740.2.1	1	1	FM	Nbenth	Not prec	Not prec	FALSE	TRUE			Alcohol dehydrogenase 2 (AHRD V1 **** Q84UY3_PETHY); contains Interpro domain(s) IPR002085 Alcohol dehydrogenase superfamily, zinc-containing
Solyc07g049690.2.1	1	1	FM	Nbenth	Not prec	Not prec	FALSE	TRUE			Cytochrome P450
Solyc02g065340.1.1	1	1	FM	Nbenth	Not prec	Not prec	FALSE	FALSE	B3	GO:0006355	B3 domain-containing protein REM14 (AHRD V1 ***- REM14_ARATH); contains Interpro domain(s) IPR003340 Transcriptional factor B3
Solyc07g042490.1.1	1	1	FM	Nbenth	Not prec	Not prec	FALSE	FALSE			SAUR33-auxin-responsive SAUR family member (AHRD V1 ***- B6T035_MAIZE); contains Interpro domain(s) IPR003676 Auxin responsive SAUR protein
Solyc01g108320.2.1	1	1	FM	Nbenth	Not prec	Not prec	FALSE	TRUE			Peroxidase (AHRD V1 ***- Q43004_ORYSJ); contains Interpro domain(s) IPR002016 Haem peroxidase, plant/fungal/bacterial
Solyc12g010430.1.1	1	1	FM	Nbenth	Not prec	Not prec	FALSE	FALSE			Unknown Protein (AHRD V1)
Solyc08g081740.2.1	1	1	FM	Nbenth	Not prec	Not prec	FALSE	FALSE			Katanin p60 ATPase-containing subunit (AHRD V1 *--* KTNA1_ARATH); contains Interpro domain(s) IPR003959 ATPase, AAA-type, core
Solyc01g093960.2.1	1	1	FM	Nbenth	Prec	Not prec	FALSE	TRUE	MIKC		MADS box transcription factor (AHRD V1 ***- Q2NNC0_ELAGV); contains Interpro domain(s) IPR002487 Transcription factor, K-box
Solyc02g077880.2.1	1	1	FM	Nbenth	Prec	Not prec	FALSE	FALSE			Auxin-repressed protein (AHRD V1 ***- Q6PXE1_9SOLN); contains Interpro domain(s) IPR008406 Dormancyauxin associated
Solyc04g082410.2.1	1	1	FM	Nbenth	Prec	Not prec	FALSE	TRUE			BTB/POZ domain-containing protein (AHRD V1 **-- D7LC69_ARALY); contains Interpro domain(s) IPR013089 Kelch related
Solyc03g098710.1.1	1	1	FM	Nbenth	Prec	Not prec	FALSE	FALSE			Kunitz-type proteinase inhibitor A4 (Fragment) (AHRD V1 **** C5IWR3_SOLBR); contains Interpro domain(s) IPR011065 Kunitz inhibitor ST1-like
Solyc08g065210.1.1	1	1	FM	Nbenth	Prec	Not prec	FALSE	TRUE			Unknown Protein (AHRD V1)
Solyc10g051390.1.1	1	1	FM	Nbenth	Prec	Not prec	FALSE	FALSE			RNA-binding glycine-rich protein-1b (AHRD V1 **** Q40427_NICSY); contains Interpro domain(s) IPR015465 RNA recognition motif, glycine rich protein
Solyc07g014730.2.1	1	1	FM	Nbenth	Prec	Not prec	FALSE	TRUE			Phospholipase A2 (AHRD V1 **** Q5CCT8_TOBAC); contains Interpro domain(s) IPR016090 Phospholipase A2
Solyc02g093910.2.1	1	1	FM	Nbenth	Prec	Not prec	FALSE	TRUE			Kelch repeat-containing protein-like (AHRD V1 ***- Q6ZK44_ORYSJ); contains Interpro domain(s) IPR015915 Kelch-type beta propeller
Solyc03g120100.2.1	1	1	FM	Nbenth	Prec	Not prec	FALSE	FALSE			Mitochondrial carrier protein (AHRD V1 ***- D2VIZ2_NAEGR); contains Interpro domain(s) IPR002113 Adenine nucleotide translocator 1
Solyc07g038160.2.1	1	1	FM	Nbenth	Prec	Not prec	FALSE	TRUE	GATA	GO:0006355	GATA transcription factor 20 (AHRD V1 *-*- B6SS40_MAIZE); contains Interpro domain(s) IPR000679 Zinc finger, GATA-type
Solyc04g064620.2.1	1	1	FM	Nbenth	Prec	Not prec	FALSE	TRUE			RAG1-activating protein 1 homolog (AHRD V1 **-- R1AP1_DROPS); contains Interpro domain(s) IPR018179 RAG1-activating protein 1 homologue
Solyc03g121100.2.1	1	1	FM	Nbenth	Prec	Not prec	FALSE	TRUE			Acid phosphatase (AHRD V1 **-- O49855_SOYBN); contains Interpro domain(s) IPR010028 Acid phosphatase, plant
Solyc04g076240.1.1	1	1	FM	Nbenth	Prec	Not prec	FALSE	FALSE	bHLH	GO:0003700	Transcription factor (AHRD V1 *--* Q9M4A8_MAIZE); contains Interpro domain(s) IPR011598 Helix-loop-helix DNA-binding
Solyc04g074770.2.1	1	1	FM	Nbenth	Prec	Not prec	FALSE	FALSE			Unknown Protein (AHRD V1)
Solyc11g071290.1.1	1	1	FM	Nbenth	Prec	Not prec	FALSE	TRUE			Alcohol dehydrogenase (AHRD V1 **** Q43169_SOLTU); contains Interpro domain(s) IPR002085 Alcohol dehydrogenase superfamily, zinc-containing
Solyc06g060110.2.1	1	1	FM	Nbenth	Prec	Not prec	FALSE	TRUE			Amino acid permease (AHRD V1 **** B9GU10_POPTR); contains Interpro domain(s) IPR013057 Amino acid transporter, transmembrane
Solyc02g082420.2.1	1	1	FM	Nbenth	Prec	Not prec	FALSE	FALSE			Ring finger protein (AHRD V1 *-*- O49869_HORVU); contains Interpro domain(s) IPR018957 Zinc finger, C3HC4 RING-type
Solyc01g089910.2.1	1	1	FM	Nbenth	Prec	Not prec	FALSE	FALSE			Flotillin domain protein (AHRD V1 ***- B8M1F1_TALSN); contains Interpro domain(s) IPR001107 Band 7 protein
Solyc12g038510.1.1	1	1	FM	Nbenth	Prec	Not prec	FALSE	TRUE	MIKC		MADS box transcription factor 11 (AHRD V1 ***- D9IFM5_ONCHC); contains Interpro domain(s) IPR002487 Transcription factor, K-box
Solyc00g009040.2.1	1	1	FM	Nbenth	Prec	Not prec	FALSE	FALSE			Polyadenylate-binding protein 2 (AHRD V1 **** B6U4M0_MAIZE); contains Interpro domain(s) IPR006515 Polyadenylate binding protein, human types 1, 2, 3, 4
Solyc01g066720.2.1	1	1	FM	Nbenth	Prec	Not prec	FALSE	TRUE			Hypoxia induced protein conserved region containing protein (AHRD V1 ***- B6UCX6_MAIZE); contains Interpro domain(s) IPR007667 Hypoxia induced protein conserved region
Solyc05g041200.2.1	1	1	FM	Nbenth	Prec	Not prec	FALSE	FALSE			4-hydroxyphenylpyruvate dioxygenase (AHRD V1 **** B7X935_HEVBR); contains Interpro domain(s) IPR005956 4-hydroxyphenylpyruvate dioxygenase
Solyc10g009110.1.1	1	1	FM	Nbenth	Prec	Not prec	FALSE	FALSE	ERF	GO:0003677_GO:0006355	Ethylene-responsive transcription factor 4 (AHRD V1 ***- B6SIZ8_MAIZE); contains Interpro domain(s) IPR001471 Pathogenesis-related transcriptional factor and ERF, DNA-binding
Solyc11g071460.1.1	1	1	FM	Nbenth	Prec	Not prec	FALSE	TRUE			Dehydrogenase/reductase SDR family member 13 (AHRD V1 **-- DHR13_BOVIN); contains Interpro domain(s) IPR002347 Glucose/ribitol dehydrogenase
Solyc06g050870.2.1	1	1	FM	Nbenth	Prec	Not prec	FALSE	TRUE			Hypoxia induced protein conserved region containing protein expressed (AHRD V1 ***- Q2QYP0_ORYSJ)
Solyc02g031710.2.1	1	1	FM	Nbenth	Prec	Not prec	FALSE	TRUE			Protein binding protein (AHRD V1 **-- D7L0L7_ARALY); contains Interpro domain(s) IPR001841 Zinc finger, RING-type
Solyc12g014500.1.1	1	1	FM	Nbenth	Prec	Not prec	FALSE	FALSE			S-adenosyl-L-methionine salicylic acid carboxyl methyltransferase-like protein (AHRD V1 **** Q9FLN8_ARATH); contains Interpro domain(s) IPR005299 SAM dependent carboxyl methyltransferase
Solyc10g007870.2.1	1	1	FM	Nbenth	Prec	Not prec	FALSE	TRUE			Tumor-related protein (AHRD V1 ***- Q40447_9SOLA)
Solyc08g078940.1.1	1	1	FM	Nbenth	Prec	Not prec	FALSE	TRUE			Cortical cell-delineating protein (AHRD V1 **-- B6U436_MAIZE); contains Interpro domain(s) IPR013770 Plant lipid transfer protein and hydrophobic protein, helical
Solyc03g034400.2.1	1	1	FM	Nbenth	Prec	Not prec	FALSE	FALSE			Multidrug resistance protein mdtK (AHRD V1 ***- MDTK_EDWI9); contains Interpro domain(s) IPR015521 MATE family transporter related protein
Solyc06g071380.2.1	1	1	FM	Nbenth	Prec	Not prec	FALSE	FALSE			Unknown Protein (AHRD V1)
Solyc01g006390.2.1	1	1	FM	Nbenth	Prec	Not prec	FALSE	FALSE			Cysteine-rich extensin-like protein-4 (AHRD V1 *-*- Q08197_TOBAC)
Solyc12g011430.1.1	1	1	FM	Nbenth	Prec	Not prec	FALSE	FALSE			Hydroxyacylglutathione hydrolase (AHRD V1 **** D9J0E0_9CARY); contains Interpro domain(s) IPR001279 Beta-lactamase-like
Solyc07g052690.2.1	1	1	FM	Nbenth	Prec	Not prec	FALSE	FALSE			Beta-amylase (AHRD V1 **** Q9AT14_CASCR); contains Interpro domain(s) IPR013781 Glycoside hydrolase, subgroup, catalytic core
Solyc06g061250.1.1	1	1	TM	Can	Not prec	Not prec	FALSE	FALSE			Ring H2 finger protein (AHRD V1 *-*- D9ZHD8_HYPPE); contains Interpro domain(s) IPR018957 Zinc finger, C3HC4 RING-type
Solyc04g082050.2.1	1	1	TM	Can	Not prec	Not prec	FALSE	TRUE			Cellular retinaldehyde-binding/triple function C-terminal (AHRD V1 **-- B6SN40_MAIZE); contains Interpro domain(s) IPR001251 Cellular retinaldehyde-binding/triple function, C-terminal
Solyc03g097920.1.1	1	1	TM	Can	Not prec	Not prec	FALSE	FALSE			Mitogen-activated protein kinase kinase (AHRD V1 **** D7NPU9_CAPAN); contains Interpro domain(s) IPR002290 Serine/threonine protein kinase
Solyc08g005880.2.1	1	1	TM	Can	Not prec	Not prec	FALSE	FALSE			Multidrug resistance protein mdtK (AHRD V1 **-- MDTK_PROMH); contains Interpro domain(s) IPR002528 Multi antimicrobial extrusion protein MatE
Solyc02g081360.2.1	1	1	TM	Can	Not prec	Not prec	FALSE	FALSE			Long-chain-fatty-acid--CoA ligase (AHRD V1 **** D0J2H7_COMT2); contains Interpro domain(s) IPR000873 AMP-dependent synthetase and ligase
Solyc06g074910.2.1	1	1	TM	Can	Not prec	Not prec	FALSE	TRUE	MYB	GO:0003677	MYB transcription factor (AHRD V1 *--- Q9T066_ARATH); contains Interpro domain(s) IPR015495 Myb transcription factor
Solyc06g071650.1.1	1	1	TM	Can	Not prec	Not prec	FALSE	TRUE			AP-1 complex subunit mu (AHRD V1 ***- Q7RVT3_NEUCR); contains Interpro domain(s) IPR001392 Clathrin adaptor, mu subunit
Solyc04g080640.1.1	1	1	TM	Can	Not prec	Not prec	FALSE	TRUE			Genomic DNA chromosome 5 TAC clone K1F13 (AHRD V1 ***- Q9FJZ5_ARATH)
Solyc08g007690.1.1	1	1	TM	Can	Not prec	Not prec	FALSE	FALSE			Subtilisin-like protease (AHRD V1 **-- Q9LWA3_SOLLC); contains Interpro domain(s) IPR015500 Peptidase S8, subtilisin-related
Solyc12g009220.1.1	1	1	TM	Can	Not prec	Not prec	FALSE	FALSE			Jasmonate ZIM-domain protein 1 (AHRD V1 **-- A7XXZ0_SOLLC); contains Interpro domain(s) IPR010399 Tify
Solyc11g013500.1.1	1	1	TM	Can	Not prec	Not prec	FALSE	TRUE			Unknown Protein (AHRD V1)
Solyc06g064960.2.1	1	1	TM	Can	Not prec	Not prec	FALSE	TRUE			GDSL esterase/lipase 5 (AHRD V1 **** GLIP5_ARATH); contains Interpro domain(s) IPR001087 Lipase, GDSL
Solyc05g006430.1.1	1	1	TM	Can	Not prec	Not prec	FALSE	TRUE			Formin 3 (AHRD V1 *-*- D0QAN4_ARATH); contains Interpro domain(s) IPR015425 Actin-binding FH2
Solyc04g007940.2.1	1	1	TM	Can	Not prec	Not prec	FALSE	FALSE			Cytochrome P450
Solyc01g066470.2.1	1	1	TM	Can	Not prec	Not prec	FALSE	TRUE			Epoxide hydrolase (AHRD V1 **** Q41413_SOLTU); contains Interpro domain(s) IPR000639 Epoxide hydrolase-like
Solyc01g088790.2.1	1	1	TM	Can	Not prec	Not prec	FALSE	FALSE			Regulatory protein (AHRD V1 **-- B6TR81_MAIZE)
Solyc02g062460.2.1	1	1	TM	Can	Not prec	Not prec	FALSE	TRUE			2-oxoglutarate-dependent dioxygenase (AHRD V1 **** B9GL08_POPTR); contains Interpro domain(s) IPR005123 Oxoglutarate and iron-dependent oxygenase
Solyc01g006660.1.1	1	1	TM	Can	Not prec	Not prec	FALSE	TRUE			Subtilisin-like serine protease (AHRD V1 **-* Q8LAE1_ARATH); contains Interpro domain(s) IPR015500 Peptidase S8, subtilisin-related
Solyc01g081040.2.1	1	1	TM	Can	Not prec	Not prec	FALSE	FALSE			RING finger protein (AHRD V1 *-*- C6EUD3_SOYBN); contains Interpro domain(s) IPR018957 Zinc finger, C3HC4 RING-type
Solyc02g072320.1.1	1	1	TM	Can	Not prec	Not prec	FALSE	TRUE			Somatic embryogenesis receptor-like kinase 2 (AHRD V1 ***- Q659J1_POAPR)
Solyc02g077970.2.1	1	1	TM	Can	Not prec	Not prec	FALSE	TRUE			Late embryo abundance protein (Fragment) (AHRD V1 *-*- C6F8V9_PSEMZ)
Solyc07g014670.2.1	1	1	TM	Can	Not prec	Not prec	FALSE	FALSE			Cytochrome P450
Solyc12g005040.1.1	1	1	TM	Can	Not prec	Not prec	FALSE	TRUE			Calcium-dependent protein kinase (AHRD V1 ***- Q9XER6_SOLTU); contains Interpro domain(s) IPR011992 EF-Hand type
Solyc12g049350.1.1	1	1	TM	Can	Not prec	Not prec	FALSE	TRUE	MYB	GO:0003677	Myb 12 transcription factor (AHRD V1 ***- D2EBC3_9SOLN); contains Interpro domain(s) IPR015495 Myb transcription factor
Solyc05g006010.2.1	1	1	TM	Can	Not prec	Not prec	FALSE	TRUE			Peptide transporter (AHRD V1 **-* A6YJX4_9MAGN); contains Interpro domain(s) IPR000109 TGF-beta receptor, type I/II extracellular region
Solyc03g112430.1.1	1	1	TM	Can	Not prec	Not prec	FALSE	TRUE	LBD		LOB domain protein 1 (AHRD V1 ***- B2KKZ3_ORYSJ); contains Interpro domain(s) IPR004883 Lateral organ boundaries, LOB
Solyc02g081370.2.1	1	1	TM	Can	Not prec	Not prec	FALSE	FALSE			Acyl-CoA synthetase /AMP-acid ligase II (AHRD V1 **** D0S5Q6_ACICA); contains Interpro domain(s) IPR000873 AMP-dependent synthetase and ligase
Solyc02g083120.1.1	1	1	TM	Can	Not prec	Not prec	FALSE	TRUE			CM0216.240.nc protein (AHRD V1 ***- B0BLH5_LOTJA); contains Interpro domain(s) IPR004320 Protein of unknown function DUF241, plant
Solyc02g071060.2.1	1	1	TM	Can	Not prec	Not prec	FALSE	TRUE			Purine permease family protein (AHRD V1 **-* D7MCV2_ARALY); contains Interpro domain(s) IPR004853 Protein of unknown function DUF250
Solyc01g102610.2.1	1	1	TM	Can	Not prec	Not prec	FALSE	TRUE			Ferric reductase oxidase (AHRD V1 **-* D6RVS5_HORVU); contains Interpro domain(s) IPR013130 Ferric reductase-like transmembrane component, N-terminal
Solyc03g083060.2.1	1	1	TM	Can	Not prec	Not prec	FALSE	TRUE			Unknown Protein (AHRD V1)
Solyc10g005060.2.1	1	1	TM	Can	Not prec	Not prec	FALSE	TRUE			O-methyltransferase-like protein (AHRD V1 **** D3JZ18_PRUMU); contains Interpro domain(s) IPR016461 O-methyltransferase, COMT, eukaryota
Solyc04g072920.2.1	1	1	TM	Can	Not prec	Not prec	FALSE	TRUE			Trehalose-6-phosphate phosphatase (AHRD V1 ***- D7KV74_ARALY); contains Interpro domain(s) IPR003337 Trehalose-phosphatase
Solyc01g098400.2.1	1	1	TM	Can	Not prec	Not prec	FALSE	TRUE			Histidine phosphotransfer protein (AHRD V1 **** B9I823_POPTR); contains Interpro domain(s) IPR008207 Signal transduction histidine kinase, phosphotransfer (Hpt) region
Solyc10g079600.1.1	1	1	TM	Can	Not prec	Prec	FALSE	TRUE		GO:0006355	Response regulator 6 (AHRD V1 ***- Q9FRY9_MAIZE); contains Interpro domain(s) IPR001789 Signal transduction response regulator, receiver region
Solyc12g088940.1.1	1	1	TM	Can	Not prec	Prec	FALSE	TRUE			Protein serine/threonine kinase (AHRD V1 *-*- D3BP85_POLPA); contains Interpro domain(s) IPR002290 Serine/threonine protein kinase
Solyc07g022830.2.1	1	1	TM	Can	Not prec	Prec	FALSE	FALSE			Xenotropic and polytropic retrovirus receptor (AHRD V1 **-- B2GU54_XENTR); contains Interpro domain(s) IPR004342 EXS, C-terminal
Solyc02g083190.1.1	1	1	TM	Can	Not prec	Prec	FALSE	FALSE			F-box family protein (AHRD V1 ***- B9HR11_POPTR); contains Interpro domain(s) IPR005174 Protein of unknown function DUF295
Solyc01g010430.2.1	1	1	TM	Can	Not prec	Prec	FALSE	FALSE			cDNA clone J023121M11 full insert sequence (AHRD V1 **-- B7F743_ORYSJ); contains Interpro domain(s) IPR007679 Protein of unknown function DUF569
Solyc08g076850.2.1	1	1	TM	Can	Not prec	Prec	FALSE	TRUE			Senescence-associated protein (AHRD V1 ***- B3TLS7_ELAGV); contains Interpro domain(s) IPR000301 Tetraspanin, subgroup
Solyc01g091660.2.1	1	1	TM	Can	Not prec	Prec	FALSE	FALSE			Alcohol dehydrogenase (Fragment) (AHRD V1 ***- Q6R4X9_ZEAMM); contains Interpro domain(s) IPR002347 Glucose/ribitol dehydrogenase
Solyc08g075430.2.1	1	1	TM	Can	Not prec	Prec	FALSE	FALSE			ABC transporter G family member 14 (AHRD V1 ***- AB14G_ARATH); contains Interpro domain(s) IPR013525 ABC-2 type transporter
Solyc09g005880.1.1	1	1	TM	Can	Not prec	Prec	FALSE	TRUE			Unknown Protein (AHRD V1)
Solyc02g092200.2.1	1	1	TM	Can	Not prec	Prec	FALSE	TRUE			Genomic DNA chromosome 5 TAC clone K9I9 (AHRD V1 *-*- Q9FJV9_ARATH)
Solyc06g074350.2.1	1	1	TM	Can	Not prec	Prec	FALSE	TRUE			self-pruning"
Solyc12g055920.1.1	1	1	TM	Can	Not prec	Prec	FALSE	TRUE			Calcineurin B-like protein 04 (AHRD V1 **-- A5C1G1_VITVI); contains Interpro domain(s) IPR015757 Calcineurin B protein
Solyc12g009110.1.1	1	1	TM	Can	Not prec	Prec	FALSE	FALSE			O-methyltransferase-like protein (AHRD V1 ***- Q9T003_ARATH); contains Interpro domain(s) IPR016461 O-methyltransferase, COMT, eukaryota
Solyc11g018690.1.1	1	1	TM	Can	Not prec	Prec	FALSE	FALSE			ABC transporter G family member 25 (AHRD V1 ***- AB25G_ARATH); contains Interpro domain(s) IPR003439 ABC transporter-like
Solyc10g081560.1.1	1	1	TM	Can	Not prec	Prec	FALSE	FALSE			Tropinone reductase I (AHRD V1 **-- Q9AR59_SOLTU); contains Interpro domain(s) IPR002347 Glucose/ribitol dehydrogenase
Solyc02g089690.2.1	1	1	TM	Can	Not prec	Prec	FALSE	TRUE			Leaf senescence protein-like (AHRD V1 ***- Q8RV74_ORYSJ); contains Interpro domain(s) IPR004253 Protein of unknown function DUF231, plant
Solyc04g010330.2.1	1	1	TM	Can and Nbenth	Not prec	Not prec	FALSE	TRUE			Auxin-regulated protein (AHRD V1 *-*- Q945F5_SOLLC); contains Interpro domain(s) IPR010369 Protein of unknown function DUF966
Solyc04g081890.1.1	1	1	TM	Can and Nbenth	Not prec	Not prec	FALSE	TRUE			Ring H2 finger protein (AHRD V1 *-*- D9ZHD8_HYPPE); contains Interpro domain(s) IPR018957 Zinc finger, C3HC4 RING-type
Solyc02g089210.2.1	1	1	TM	Can and Nbenth	Not prec	Not prec	FALSE	TRUE	MIKC		MADS box transcription factor (AHRD V1 ***- Q689E7_GENTR); contains Interpro domain(s) IPR002487 Transcription factor, K-box
Solyc12g049540.1.1	1	1	TM	Can and Nbenth	Not prec	Not prec	FALSE	TRUE			Polyphosphoinositide phosphatase (AHRD V1 ***- C0S4L1_PARBP); contains Interpro domain(s) IPR002013 Synaptojanin, N-terminal
Solyc02g089160.2.1	1	1	TM	Can and Nbenth	Not prec	Not prec	FALSE	TRUE			Cytochrome P450
Solyc03g081240.2.1	1	1	TM	Can and Nbenth	Not prec	Not prec	FALSE	TRUE		GO:0006355	Pseudo response regulator (AHRD V1 ***- B9IDF0_POPTR); contains Interpro domain(s) IPR001789 Signal transduction response regulator, receiver region
Solyc07g064180.2.1	1	1	TM	Can and Nbenth	Not prec	Not prec	FALSE	FALSE			Pectinesterase (AHRD V1 ***- B9RXQ4_RICCO); contains Interpro domain(s) IPR018040 Pectinesterase, active site IPR000070 Pectinesterase, catalytic
Solyc03g097530.2.1	1	1	TM	Can and Nbenth	Not prec	Not prec	FALSE	TRUE			TPD1 (AHRD V1 ***- Q6TLJ2_ARATH)
Solyc10g078370.1.1	1	1	TM	Can and Nbenth	Not prec	Not prec	FALSE	TRUE			Auxin efflux carrier (AHRD V1 ***- D6RT09_SOLLC); contains Interpro domain(s) IPR014024 Auxin efflux carrier, subgroup
Solyc12g094520.1.1	1	1	TM	Can and Nbenth	Not prec	Not prec	FALSE	TRUE			4-coumarate-coa ligase (AHRD V1 ***- B9MY03_POPTR); contains Interpro domain(s) IPR000873 AMP-dependent synthetase and ligase
Solyc03g112580.2.1	1	1	TM	Can and Nbenth	Not prec	Not prec	FALSE	TRUE			Receptor like kinase, RLK
Solyc02g089620.2.1	1	1	TM	Can and Nbenth	Not prec	Not prec	FALSE	TRUE			Proline dehydrogenase (AHRD V1 **** A1E289_ACTDE); contains Interpro domain(s) IPR015659 Proline oxidase
Solyc02g070430.2.1	1	1	TM	Can and Nbenth	Not prec	Not prec	FALSE	TRUE			Gibberellin 2-oxidase 1 (AHRD V1 **** A7LCJ5_SOLTU); contains Interpro domain(s) IPR005123 Oxoglutarate and iron-dependent oxygenase
Solyc01g010150.2.1	1	1	TM	Can and Nbenth	Not prec	Not prec	FALSE	TRUE			Unknown protein DS12 from 2D-PAGE of leaf, chloroplastic (AHRD V1 *--- UP12_ORYSJ); contains Interpro domain(s) IPR002912 Amino acid-binding ACT
Solyc10g075050.1.1	1	1	TM	Can and Nbenth	Not prec	Not prec	FALSE	TRUE			Non-specific lipid-transfer protein (AHRD V1 ***- A7UGG9_SOLTU); contains Interpro domain(s) IPR013770 Plant lipid transfer protein and hydrophobic protein, helical
Solyc06g069670.2.1	1	1	TM	Can and Nbenth	Not prec	Not prec	FALSE	FALSE			Formin 2A (AHRD V1 *-*- C7BGM8_PHYPA); contains Interpro domain(s) IPR015425 Actin-binding FH2
Solyc01g067540.1.1	1	1	TM	Can and Nbenth	Not prec	Not prec	FALSE	TRUE	ERF	GO:0003677_GO:0006355	Ethylene responsive transcription factor 12 (AHRD V1 *-*- C0J9I3_9ROSA); contains Interpro domain(s) IPR001471 Pathogenesis-related transcriptional factor and ERF, DNA-binding
Solyc07g007750.2.1	1	1	TM	Can and Nbenth	Not prec	Not prec	FALSE	TRUE			Defensin protein (AHRD V1 ***- B1N678_SOLLC); contains Interpro domain(s) IPR008177 Gamma Purothionin
Solyc07g063820.2.1	1	1	TM	Can and Nbenth	Not prec	Not prec	FALSE	FALSE			Serine/threonine-protein kinase receptor (AHRD V1 **** B6U2B7_MAIZE); contains Interpro domain(s) IPR002290 Serine/threonine protein kinase
Solyc10g011960.1.1	1	1	TM	Can and Nbenth	Not prec	Not prec	FALSE	FALSE			Unknown Protein (AHRD V1)
Solyc04g076480.2.1	1	1	TM	Can and Nbenth	Not prec	Not prec	FALSE	TRUE			Serine/threonine-protein kinase B-raf (AHRD V1 *-** BRAF_COTJA); contains Interpro domain(s) IPR002290 Serine/threonine protein kinase
Solyc02g092490.2.1	1	1	TM	Can and Nbenth	Not prec	Not prec	FALSE	TRUE			Acetyltransferase-like protein (AHRD V1 ***- Q7EYF5_ORYSJ); contains Interpro domain(s) IPR000182 GCN5-related N-acetyltransferase
Solyc01g065540.2.1	1	1	TM	Can and Nbenth	Not prec	Not prec	FALSE	TRUE	ARR-B	GO:0003700	Response regulator 8 (AHRD V1 *-*- Q9AV93_MAIZE); contains Interpro domain(s) IPR017053 Response regulator, plant B-type
Solyc02g088820.2.1	1	1	TM	Can and Nbenth	Not prec	Not prec	FALSE	TRUE			Serine carboxypeptidase K10B2.2 (AHRD V1 **** B6TSK4_MAIZE); contains Interpro domain(s) IPR001563 Peptidase S10, serine carboxypeptidase
Solyc01g096410.2.1	1	1	TM	Can and Nbenth	Not prec	Not prec	FALSE	TRUE			Phosphatidylinositol-4-phosphate 5-kinase family protein (AHRD V1 ***- D7L735_ARALY); contains Interpro domain(s) IPR017163 Phosphatidylinositol-4-phosphate 5-kinase, plant
Solyc02g077780.2.1	1	1	TM	Can and Nbenth	Not prec	Not prec	FALSE	TRUE			Necrotic spotted lesions 1 (Fragment) (AHRD V1 *-*- B6ZA38_HELPE); contains Interpro domain(s) IPR001862 Membrane attack complex component/perforin/complement C9
Solyc01g098820.2.1	1	1	TM	Can and Nbenth	Not prec	Not prec	FALSE	TRUE			Phototropic-responsive NPH3 family protein (AHRD V1 **-- D7KEU3_ARALY); contains Interpro domain(s) IPR004249 NPH3
Solyc04g080970.2.1	1	1	TM	Can and Nbenth	Not prec	Not prec	FALSE	TRUE	SRS		Short internode related sequence 5 (AHRD V1 **-- D2KC76_BRARP); contains Interpro domain(s) IPR007818 Protein of unknown function DUF702
Solyc03g113350.2.1	1	1	TM	Can and Nbenth	Not prec	Not prec	FALSE	TRUE			CHY zinc finger containing protein (AHRD V1 *-*- C5P643_COCP7); contains Interpro domain(s) IPR008913 Zinc finger, CHY-type
Solyc02g081230.2.1	1	1	TM	Can and Nbenth	Not prec	Not prec	FALSE	TRUE			Unknown Protein (AHRD V1)
Solyc06g074000.1.1	1	1	TM	Can and Nbenth	Not prec	Prec	FALSE	FALSE			Aspartic proteinase nepenthesin-2 (AHRD V1 **-- B6SJT4_MAIZE); contains Interpro domain(s) IPR001461 Peptidase A1
Solyc04g008450.2.1	1	1	TM	Can and Nbenth	Not prec	Prec	FALSE	FALSE			Potassium transporter 17 (AHRD V1 **** B6T8T1_MAIZE); contains Interpro domain(s) IPR003855 K+ potassium transporter
Solyc03g025800.2.1	1	1	TM	Can and Nbenth	Not prec	Prec	FALSE	TRUE			Os03g0111400 protein (Fragment) (AHRD V1 *-*- Q0DVV0_ORYSJ); contains Interpro domain(s) IPR006121 Heavy metal transport/detoxification protein
Solyc02g063430.2.1	1	1	TM	Can and Nbenth	Not prec	Prec	FALSE	FALSE	bHLH	GO:0003700	BHLH transcription factor (AHRD V1 **** A9YWR2_MEDTR); contains Interpro domain(s) IPR011598 Helix-loop-helix DNA-binding
Solyc03g007240.2.1	1	1	TM	Can and Nbenth	Not prec	Prec	FALSE	FALSE			Spermidine synthase 1 (AHRD V1 **** B6TA19_MAIZE); contains Interpro domain(s) IPR001045 Spermine synthase
Solyc10g080930.1.1	1	1	TM	Can and Nbenth	Not prec	Prec	FALSE	TRUE			Transcription elongation factor A protein 2 (AHRD V1 *--- TCEA2_HUMAN); contains Interpro domain(s) IPR010990 Transcription elongation factor, TFIIS/elongin A/CRSP70, N-terminal
Solyc06g072430.1.1	1	1	TM	Can and Nbenth	Not prec	Prec	FALSE	TRUE			Bcl-2-associated athanogene-like protein (AHRD V1 *-*- D1MIX4_VITVI); contains Interpro domain(s) IPR003103 Apoptosis regulator Bcl-2 protein, BAG
Solyc09g074970.2.1	1	1	TM	Can and Nbenth	Not prec	Prec	FALSE	TRUE			Thiamin pyrophosphokinase 1 (AHRD V1 **** B6SUI9_MAIZE); contains Interpro domain(s) IPR016966 Thiamin pyrophosphokinase, eukaryotic
Solyc02g093040.2.1	1	1	TM	Can and Nbenth	Not prec	Prec	FALSE	TRUE			Cathepsin B-like cysteine proteinase (AHRD V1 **-* CYSP_SCHMA); contains Interpro domain(s) IPR013128 Peptidase C1A, papain
Solyc03g019950.2.1	1	1	TM	Can and Nbenth	Prec	Not prec	FALSE	TRUE			Genomic DNA chromosome 5 P1 clone MAC12 (AHRD V1 **-- Q9FFX3_ARATH); contains Interpro domain(s) IPR004328 BRO1
Solyc03g122190.2.1	1	1	TM	Can and Nbenth	Prec	Not prec	FALSE	TRUE			Jasmonate ZIM domain 2 (AHRD V1 **-- C7SCY2_CATRO); contains Interpro domain(s) IPR010399 Tify
Solyc02g072310.2.1	1	1	TM	Can and Nbenth	Prec	Not prec	FALSE	TRUE			Receptor like kinase, RLK
Solyc01g098240.1.1	1	1	TM	Can and Nbenth	Prec	Not prec	FALSE	FALSE			RNA polymerase Rpb1 C-terminal repeat domain-containing protein (AHRD V1 *--- C5GU31_AJEDR); contains Interpro domain(s) IPR012474 Frigida-like
Solyc04g080580.2.1	1	1	TM	Can and Nbenth	Prec	Not prec	FALSE	TRUE			Kinase PfkB family (AHRD V1 **** D4WID3_BACOV); contains Interpro domain(s) IPR011611 Carbohydrate/purine kinase
Solyc10g076790.1.1	1	1	TM	Can and Nbenth	Prec	Not prec	FALSE	TRUE			Auxin transporter-like protein 1 (AHRD V1 **** B6U1Y3_MAIZE); contains Interpro domain(s) IPR013057 Amino acid transporter, transmembrane
Solyc03g026040.2.1	1	1	TM	Can and Nbenth	Prec	Not prec	FALSE	TRUE			Receptor like kinase, RLK
Solyc04g078460.2.1	1	1	TM	Can and Nbenth	Prec	Not prec	FALSE	TRUE			N(4)-(Beta-N-acetylglucosaminyl)-L-asparaginase (AHRD V1 **** ASPG_ELIMR); contains Interpro domain(s) IPR000246 Peptidase T2, asparaginase 2
Solyc01g102400.2.1	1	1	TM	Can and Nbenth	Prec	Not prec	FALSE	TRUE			Germin-like protein (AHRD V1 ***- O65358_SOLTU); contains Interpro domain(s) IPR014710 RmlC-like jelly roll fold
Solyc03g082690.2.1	1	1	TM	Can and Nbenth	Prec	Not prec	FALSE	FALSE			U-box domain-containing protein (AHRD V1 *-*- Q1ENX4_MUSAC); contains Interpro domain(s) IPR011989 Armadillo-like helical
Solyc05g006550.2.1	1	1	TM	Can and Nbenth	Prec	Not prec	FALSE	TRUE			Microtubule-associated protein TORTIFOLIA1 (AHRD V1 *--- B6SS76_MAIZE); contains Interpro domain(s) IPR011989 Armadillo-like helical
Solyc01g010130.2.1	1	1	TM	Can and Nbenth	Prec	Not prec	FALSE	TRUE	bHLH	GO:0003700	Transcription factor (AHRD V1 *-** D6MKM4_9ASPA); contains Interpro domain(s) IPR011598 Helix-loop-helix DNA-binding
Solyc07g056360.1.1	1	1	TM	Can and Nbenth	Prec	Not prec	FALSE	TRUE			Unknown Protein (AHRD V1)
Solyc10g074870.1.1	1	1	TM	Can and Nbenth	Prec	Not prec	FALSE	TRUE			KH domain containing RNA binding signal transduction associated 1 (AHRD V1 *--- Q29RQ2_BOVIN); contains Interpro domain(s) IPR004087 K Homology
Solyc01g098500.2.1	1	1	TM	Can and Nbenth	Prec	Not prec	FALSE	FALSE			Glucose transporter 8 (AHRD V1 ***- Q2KKJ3_SOLIN); contains Interpro domain(s) IPR003663 Sugar/inositol transporter
Solyc09g025280.1.1	1	1	TM	Can and Nbenth	Prec	Not prec	FALSE	FALSE			Light-dependent short hypocotyls 1 (AHRD V1 ***- D7M6V0_ARALY); contains Interpro domain(s) IPR006936 Protein of unknown function DUF640
Solyc07g065540.1.1	1	1	TM	Can and Nbenth	Prec	Not prec	FALSE	TRUE			Fasciclin-like arabinogalactan protein 10 (AHRD V1 ***- A9XTL5_GOSHI); contains Interpro domain(s) IPR000782 FAS1 domain
Solyc09g091060.2.1	1	1	TM	Can and Nbenth	Prec	Not prec	FALSE	TRUE			Unknown Protein (AHRD V1)
Solyc06g062790.2.1	1	1	TM	Can and Nbenth	Prec	Not prec	FALSE	TRUE			Casein kinase I-like (AHRD V1 ***- Q8LR51_ORYSJ); contains Interpro domain(s) IPR002290 Serine/threonine protein kinase
Solyc09g005690.2.1	1	1	TM	Can and Nbenth	Prec	Not prec	FALSE	TRUE			Inositol-1 4 5-trisphosphate 5-Phosphatase-like protein (AHRD V1 ***- Q9M1W5_ARATH); contains Interpro domain(s) IPR000300 Inositol polyphosphate related phosphatase
Solyc06g066340.2.1	1	1	TM	Can and Nbenth	Prec	Not prec	FALSE	TRUE	G2-like		Myb family transcription factor-like protein (AHRD V1 *--- Q84UP8_ORYSJ); contains Interpro domain(s) IPR006447 Myb-like DNA-binding region, SHAQKYF class
Solyc04g015970.2.1	1	1	TM	Can and Nbenth	Prec	Not prec	FALSE	TRUE			ATP-binding cassette 1 (AHRD V1 *-*- Q80ZB2_RAT); contains Interpro domain(s) IPR003439 ABC transporter-like
Solyc02g067040.2.1	1	1	TM	Can and Nbenth	Prec	Not prec	FALSE	TRUE			cDNA clone J075153F01 full insert sequence (AHRD V1 *--- B7F9A7_ORYSJ); contains Interpro domain(s) IPR009769 Protein of unknown function DUF1336
Solyc01g005300.2.1	1	1	TM	Can and Nbenth	Prec	Not prec	FALSE	TRUE			Flavin-binding kelch domain F box protein (AHRD V1 **-* D7KVS5_ARALY); contains Interpro domain(s) IPR015915 Kelch-type beta propeller
Solyc04g007790.2.1	1	1	TM	Can and Nbenth	Prec	Not prec	FALSE	FALSE			Major latex-like protein (AHRD V1 **-- B5THI3_PANGI); contains Interpro domain(s) IPR000916 Bet v I allergen
Solyc09g097930.2.1	1	1	TM	Can and Nbenth	Prec	Not prec	FALSE	TRUE			MazG nucleotide pyrophosphohydrolase (AHRD V1 ***- B1J275_PSEPW); contains Interpro domain(s) IPR004518 NTP pyrophosphohydrolase MazG, putative catalytic core
Solyc04g078110.1.1	1	1	TM	Can and Nbenth	Prec	Not prec	FALSE	TRUE			Subtilisin-like protease (AHRD V1 **-- A9XG40_TOBAC); contains Interpro domain(s) IPR015500 Peptidase S8, subtilisin-related
Solyc01g088660.2.1	1	1	TM	Can and Nbenth	Prec	Not prec	FALSE	TRUE			Os04g0585900 protein (Fragment) (AHRD V1 *-*- Q0JAP2_ORYSJ); contains Interpro domain(s) IPR007650 Protein of unknown function DUF581
Solyc08g077010.1.1	1	1	TM	Can and Nbenth	Prec	Not prec	FALSE	TRUE			AT-hook DNA-binding protein (Fragment) (AHRD V1 *--* A1DR79_CATRO); contains Interpro domain(s) IPR014476 Predicted AT-hook DNA-binding
Solyc07g053290.2.1	1	1	TM	Can and Nbenth	Prec	Not prec	FALSE	TRUE	bHLH	GO:0003700	BHLH transcription factor (AHRD V1 *--* B4FMK3_MAIZE); contains Interpro domain(s) IPR001092 Basic helix-loop-helix dimerisation region bHLH
Solyc04g080820.2.1	1	1	TM	Can and Nbenth	Prec	Not prec	FALSE	TRUE			Cytokinin oxidase/dehydrogenase (AHRD V1 **** C3VPM7_SOLTU); contains Interpro domain(s) IPR015345 Cytokinin dehydrogenase 1, FAD and cytokinin binding
Solyc06g065100.2.1	1	1	TM	Can and Nbenth	Prec	Not prec	FALSE	TRUE	MYB	GO:0003700	Myb-like transcription factor 1 (AHRD V1 **** Q8H271_GOSHI); contains Interpro domain(s) IPR015495 Myb transcription factor
Solyc01g095630.2.1	1	1	TM	Can and Nbenth	Prec	Not prec	FALSE	TRUE	WRKY		WRKY transcription factor (AHRD V1 ***- D3YEX5_SOLLC); contains Interpro domain(s) IPR003657 DNA-binding WRKY
Solyc03g080180.2.1	1	1	TM	Can and Nbenth	Prec	Not prec	FALSE	TRUE			O-methyltransferase (AHRD V1 **** Q9LWB8_9ROSI); contains Interpro domain(s) IPR016461 O-methyltransferase, COMT, eukaryota
Solyc01g080960.2.1	1	1	TM	Can and Nbenth	Prec	Not prec	FALSE	TRUE			AT-hook DNA-binding protein (Fragment) (AHRD V1 *--* A1DR79_CATRO); contains Interpro domain(s) IPR014476 Predicted AT-hook DNA-binding
Solyc12g008640.1.1	1	1	TM	Can and Nbenth	Prec	Not prec	FALSE	TRUE			Gamma-glutamyltransferase-like protein (AHRD V1 ***- Q9M0G0_ARATH); contains Interpro domain(s) IPR000101 Gamma-glutamyltranspeptidase
Solyc08g074390.2.1	1	1	TM	Can and Nbenth	Prec	Not prec	FALSE	TRUE			Glucan endo-1 3-beta-glucosidase 6 (AHRD V1 ***- B6TW83_MAIZE); contains Interpro domain(s) IPR013781 Glycoside hydrolase, subgroup, catalytic core
Solyc03g006590.2.1	1	1	TM	Can and Nbenth	Prec	Not prec	FALSE	TRUE			Unknown Protein (AHRD V1)
Solyc11g064800.1.1	1	1	TM	Can and Nbenth	Prec	Not prec	FALSE	TRUE	SRS		Stylish (AHRD V1 *--- D2KC71_BRARP); contains Interpro domain(s) IPR007818 Protein of unknown function DUF702
Solyc08g079030.2.1	1	1	TM	Can and Nbenth	Prec	Not prec	FALSE	TRUE			Unknown Protein (AHRD V1); contains Interpro domain(s) IPR008581 Protein of unknown function DUF863, plant
Solyc03g006240.2.1	1	1	TM	Can and Nbenth	Prec	Not prec	FALSE	FALSE			GDSL esterase/lipase At5g45910 (AHRD V1 ***- GDL83_ARATH); contains Interpro domain(s) IPR001087 Lipase, GDSL
Solyc04g077480.2.1	1	1	TM	Can and Nbenth	Prec	Not prec	FALSE	TRUE	bHLH	GO:0003700	Transcription factor (AHRD V1 *-** D6MKM4_9ASPA); contains Interpro domain(s) IPR011598 Helix-loop-helix DNA-binding
Solyc01g009860.2.1	1	1	TM	Can and Nbenth	Prec	Not prec	FALSE	FALSE	NAC	GO:0003700	NAC domain transcription factor (AHRD V1 **** Q5DM36_WHEAT); contains Interpro domain(s) IPR003441 No apical meristem (NAM) protein
Solyc02g084960.1.1	1	1	TM	Can and Nbenth	Prec	Not prec	FALSE	TRUE			Genomic DNA chromosome 5 TAC clone K1F13 (AHRD V1 ***- Q9FJZ5_ARATH)
Solyc03g115770.2.1	1	1	TM	Can and Nbenth	Prec	Not prec	FALSE	TRUE			Timing of CAB expression-like
Solyc09g010230.1.1	1	1	TM	Can and Nbenth	Prec	Not prec	FALSE	TRUE	B3	GO:0003700	Auxin response factor 24 (AHRD V1 *-** D9HNV1_MAIZE); contains Interpro domain(s) IPR003340 Transcriptional factor B3
Solyc09g074210.2.1	1	1	TM	Can and Nbenth	Prec	Not prec	FALSE	TRUE			Endonuclease/exonuclease/phosphatase family protein (AHRD V1 ***- D7LHF0_ARALY); contains Interpro domain(s) IPR005135 Endonuclease/exonuclease/phosphatase
Solyc03g063550.1.1	1	1	TM	Can and Nbenth	Prec	Not prec	FALSE	TRUE			Unknown Protein (AHRD V1)
Solyc08g080460.1.1	1	1	TM	Can and Nbenth	Prec	Not prec	FALSE	TRUE			Serine/threonine protein kinase (AHRD V1 *-** C4PKQ3_PRUPE); contains Interpro domain(s) IPR002290 Serine/threonine protein kinase
Solyc09g098420.1.1	1	1	TM	Can and Nbenth	Prec	Not prec	FALSE	TRUE			Receptor like kinase, RLK
Solyc03g121270.2.1	1	1	TM	Can and Nbenth	Prec	Not prec	FALSE	FALSE			IAA-amino acid hydrolase (AHRD V1 **** D5FTH2_POPTO); contains Interpro domain(s) IPR017439 Peptidase M20D, mername-AA028/carboxypeptidase Ss1
Solyc02g087010.2.1	1	1	TM	Can and Nbenth	Prec	Not prec	FALSE	TRUE			NHL repeat-containing protein (AHRD V1 ***- D7KY00_ARALY); contains Interpro domain(s) IPR001258 NHL repeat
Solyc08g079650.2.1	1	1	TM	Can and Nbenth	Prec	Not prec	FALSE	TRUE			ACT domain containing protein expressed (AHRD V1 **-- Q10P43_ORYSJ); contains Interpro domain(s) IPR002912 Amino acid-binding ACT
Solyc06g083370.2.1	1	1	TM	Can and Nbenth	Prec	Not prec	FALSE	FALSE			Os01g0917200 protein (Fragment) (AHRD V1 ***- Q0JGL5_ORYSJ); contains Interpro domain(s) IPR009003 Peptidase, trypsin-like serine and cysteine
Solyc06g054250.2.1	1	1	TM	Can and Nbenth	Prec	Prec	TRUE	TRUE			5&apos-nucleotidase surE (AHRD V1 ***- D6YVT2_WADCW); contains Interpro domain(s) IPR002828 Survival protein SurE-like phosphatase/nucleotidase
Solyc12g005030.1.1	1	1	TM	Can and Nbenth	Prec	Prec	TRUE	FALSE			Calcium-dependent protein kinase (AHRD V1 ***- Q9XER6_SOLTU); contains Interpro domain(s) IPR002290 Serine/threonine protein kinase
Solyc09g082570.2.1	1	1	TM	Can and Nbenth	Prec	Prec	TRUE	TRUE			Neurogenic locus notch protein-like (AHRD V1 ***- B6SSE6_MAIZE)
Solyc03g117100.2.1	1	1	TM	Can and Nbenth	Prec	Prec	TRUE	TRUE			PPPDE peptidase domain-containing protein 1 (AHRD V1 *--- PPDE1_DANRE); contains Interpro domain(s) IPR008580 Protein of unknown function DUF862, eukaryotic
Solyc09g075350.2.1	1	1	TM	Can and Nbenth	Prec	Prec	TRUE	FALSE			Pectinesterase (AHRD V1 ***- B9SAU4_RICCO); contains Interpro domain(s) IPR000070 Pectinesterase, catalytic
Solyc11g032130.1.1	1	1	TM	Can and Nbenth	Prec	Prec	TRUE	FALSE			NADPH dehydrogenase 3 (AHRD V1 **-* OYE3_YEAST); contains Interpro domain(s) IPR001155 NADH:flavin oxidoreductase/NADH oxidase, N-terminal
Solyc04g077170.2.1	1	1	TM	Can and Nbenth	Prec	Prec	TRUE	TRUE			EPIDERMAL PATTERNING FACTOR-like protein 2 (AHRD V1 ***- EPFL2_ARATH)
Solyc01g109880.2.1	1	1	TM	Can and Nbenth	Prec	Prec	TRUE	TRUE	bZIP	GO:0003677	BZIP transcription factor (AHRD V1 ***- C0KYN1_SOLLC); contains Interpro domain(s) IPR011700 Basic leucine zipper
Solyc11g071470.1.1	1	1	TM	Can and Nbenth	Prec	Prec	TRUE	TRUE			Hydroxycinnamoyl CoA shikimate/quinate hydroxycinnamoyltransferase-like protein (Fragment) (AHRD V1 **-- B9GF60_POPTR); contains Interpro domain(s) IPR003480 Transferase
Solyc05g009770.1.1	1	1	TM	Can and Nbenth	Prec	Prec	TRUE	TRUE	C2H2	GO:0003700	Zinc finger family protein (AHRD V1 ***- D7KQE1_ARALY); contains Interpro domain(s) IPR007087 Zinc finger, C2H2-type
Solyc01g005560.2.1	1	1	TM	Can and Nbenth	Prec	Prec	TRUE	TRUE			Isocitrate dehydrogenase (AHRD V1 ***- D2D324_GOSHI); contains Interpro domain(s) IPR004790 Isocitrate dehydrogenase NADP-dependent, eukaryotic
Solyc01g099290.2.1	1	1	TM	Can and Nbenth	Prec	Prec	TRUE	FALSE			Cullin-like protein1 (AHRD V1 ***- Q8LP18_PEA); contains Interpro domain(s) IPR016159 Cullin repeat-like
Solyc04g080740.1.1	1	1	TM	Can and Nbenth	Prec	Prec	TRUE	TRUE	bZIP		BZIP transcription factor family protein (AHRD V1 **-- D7KSN7_ARALY); contains Interpro domain(s) IPR011700 Basic leucine zipper
Solyc08g078590.1.1	1	1	TM	Can and Nbenth	Prec	Prec	TRUE	TRUE	C2H2		Zinc finger protein-like (AHRD V1 *-*- Q9M202_ARATH); contains Interpro domain(s) IPR007087 Zinc finger, C2H2-type
Solyc04g076790.2.1	1	1	TM	Can and Nbenth	Prec	Prec	TRUE	TRUE			Serine hydroxymethyltransferase (AHRD V1 **** B9SMX7_RICCO); contains Interpro domain(s) IPR001085 Serine hydroxymethyltransferase
Solyc02g087850.1.1	1	1	TM	Can and Nbenth	Prec	Prec	TRUE	TRUE			Glutaredoxin family protein (AHRD V1 **-- D7LM49_ARALY); contains Interpro domain(s) IPR012335 Thioredoxin fold
Solyc06g072360.2.1	1	1	TM	Can and Nbenth	Prec	Prec	TRUE	TRUE	C2H2	GO:0003700	Zinc finger protein (AHRD V1 *-*- Q764N7_MALDO); contains Interpro domain(s) IPR007087 Zinc finger, C2H2-type
Solyc07g043120.1.1	1	1	TM	Can and Nbenth	Prec	Prec	TRUE	TRUE			UDP-glucosyltransferase (AHRD V1 **** A7M6U9_IPONI); contains Interpro domain(s) IPR002213 UDP-glucuronosyl/UDP-glucosyltransferase
Solyc11g069030.1.1	1	1	TM	Can and Nbenth	Prec	Prec	TRUE	TRUE	MYB	GO:0003677	MYB transcription factor (AHRD V1 *--- Q9T066_ARATH); contains Interpro domain(s) IPR017930 Myb-type HTH DNA-binding domain
Solyc06g071180.2.1	1	1	TM	Can and Nbenth	Prec	Prec	TRUE	FALSE			Dynein light chain 1 cytoplasmic (AHRD V1 *-*- Q7RN10_PLAYO); contains Interpro domain(s) IPR001372 Dynein light chain, type 1 and 2
Solyc08g005240.1.1	1	1	TM	Can and Nbenth	Prec	Prec	TRUE	TRUE			Lysine-specific demethylase 5B (AHRD V1 *--* KDM5B_HUMAN); contains Interpro domain(s) IPR013129 Transcription factor jumonji
Solyc12g010180.1.1	1	1	TM	Can and Nbenth	Prec	Prec	TRUE	TRUE			Anthranilate synthase (AHRD V1 ***- A1KAT4_AZOSB); contains Interpro domain(s) IPR000991 Glutamine amidotransferase class-I, C-terminal
Solyc06g074630.2.1	1	1	TM	Can and Nbenth	Prec	Prec	TRUE	TRUE			Cellulose synthase-like C6 glycosyltransferase family 2 (AHRD V1 **-* A6N4C3_PHYPA); contains Interpro domain(s) IPR001173 Glycosyl transferase, family 2
Solyc09g011750.2.1	1	1	TM	Can and Nbenth	Prec	Prec	TRUE	TRUE			Receptor-like protein kinase At5g59670 (AHRD V1 *-*- RLK7_ARATH); contains Interpro domain(s) IPR002290 Serine/threonine protein kinase
Solyc08g079020.2.1	1	1	TM	Can and Nbenth	Prec	Prec	TRUE	TRUE			Adenine phosphoribosyltransferase-like protein (AHRD V1 **** Q8LG17_ARATH); contains Interpro domain(s) IPR005764 Adenine phosphoribosyl transferase
Solyc02g079010.2.1	1	1	TM	Nbenth	Not prec	Not prec	FALSE	TRUE			Cotton fiber expressed protein 1 (AHRD V1 ***- O81373_GOSHI); contains Interpro domain(s) IPR008480 Protein of unknown function DUF761, plant
Solyc10g083210.1.1	1	1	TM	Nbenth	Not prec	Not prec	FALSE	TRUE	B3	GO:0006355	Auxin response factor 1 (AHRD V1 *-*- D9HNS8_MAIZE); contains Interpro domain(s) IPR003340 Transcriptional factor B3
Solyc04g010320.1.1	1	1	TM	Nbenth	Not prec	Not prec	FALSE	TRUE			Cytochrome P450
Solyc09g090760.2.1	1	1	TM	Nbenth	Not prec	Not prec	FALSE	TRUE			Folate/biopterin transporter family protein (AHRD V1 *-*- B6TYM7_MAIZE); contains Interpro domain(s) IPR004324 Biopterin transport-related protein BT1
Solyc09g019980.2.1	1	1	TM	Nbenth	Not prec	Not prec	FALSE	TRUE			Ferric-chelate reductase 1 (AHRD V1 *--- C0HB47_SALSA); contains Interpro domain(s) IPR006593 Cytochrome b561/ferric reductase transmembrane
Solyc08g075150.2.1	1	1	TM	Nbenth	Not prec	Not prec	FALSE	TRUE			Genomic DNA chromosome 5 TAC clone K9E15 (AHRD V1 *-*- Q9FH79_ARATH)
Solyc10g082020.1.1	1	1	TM	Nbenth	Not prec	Not prec	FALSE	TRUE			Cytokinin riboside 5&apos;-monophosphate phosphoribohydrolase LOG (AHRD V1 **-- LOG_ORYSJ); contains Interpro domain(s) IPR005269 Conserved hypothetical protein CHP00730
Solyc06g062750.2.1	1	1	TM	Nbenth	Not prec	Not prec	FALSE	TRUE			5&apos-nucleotidase surE (AHRD V1 *-*- C7LSK7_DESBD); contains Interpro domain(s) IPR002828 Survival protein SurE-like phosphatase/nucleotidase
Solyc02g080480.2.1	1	1	TM	Nbenth	Not prec	Not prec	FALSE	TRUE			Multidrug resistance protein mdtK (AHRD V1 **-- MDTK_EDWI9); contains Interpro domain(s) IPR002528 Multi antimicrobial extrusion protein MatE
Solyc06g053830.2.1	1	1	TM	Nbenth	Not prec	Not prec	FALSE	TRUE		GO:0003700	Auxin responsive protein (AHRD V1 ***- D9IQE6_CATRO); contains Interpro domain(s) IPR003311 AUX/IAA protein
Solyc01g098650.2.1	1	1	TM	Nbenth	Not prec	Not prec	FALSE	TRUE			GDSL esterase/lipase At1g54790 (AHRD V1 ***- GDL22_ARATH); contains Interpro domain(s) IPR001087 Lipase, GDSL
Solyc01g080220.2.1	1	1	TM	Nbenth	Not prec	Not prec	FALSE	TRUE			Dienelactone hydrolase family protein (AHRD V1 **-- D7L3C7_ARALY); contains Interpro domain(s) IPR002925 Dienelactone hydrolase
Solyc01g091420.1.1	1	1	TM	Nbenth	Not prec	Not prec	FALSE	TRUE	LBD		LOB domain protein 30 (AHRD V1 ***- D7M5R6_ARALY); contains Interpro domain(s) IPR004883 Lateral organ boundaries, LOB
Solyc04g014510.2.1	1	1	TM	Nbenth	Not prec	Not prec	FALSE	TRUE			Glutamine synthetase (AHRD V1 ***- Q5QJ64_9SOLA); contains Interpro domain(s) IPR008146 Glutamine synthetase, catalytic region
Solyc04g048900.2.1	1	1	TM	Nbenth	Not prec	Not prec	FALSE	FALSE			Calreticulin 2 calcium-binding protein (AHRD V1 **** A8HMC0_CHLRE); contains Interpro domain(s) IPR009169 Calreticulin
Solyc09g005070.1.1	1	1	TM	Nbenth	Not prec	Not prec	FALSE	TRUE	bHLH		Transcription factor (Fragment) (AHRD V1 *-*- D6MK13_9ASPA); contains Interpro domain(s) IPR001092 Basic helix-loop-helix dimerisation region bHLH
Solyc08g008360.2.1	1	1	TM	Nbenth	Not prec	Not prec	FALSE	TRUE			Unknown Protein (AHRD V1)
Solyc05g015910.1.1	1	1	TM	Nbenth	Not prec	Not prec	FALSE	TRUE			Glutaredoxin (AHRD V1 **** B9GZC7_POPTR); contains Interpro domain(s) IPR011905 Glutaredoxin-like, plant II
Solyc04g074700.2.1	1	1	TM	Nbenth	Not prec	Not prec	FALSE	TRUE	HD-ZIP	GO:0006355	Homeobox-leucine zipper protein (AHRD V1 *-*- Q9FXN8_ZINEL); contains Interpro domain(s) IPR003106 Leucine zipper, homeobox-associated
Solyc04g051540.2.1	1	1	TM	Nbenth	Prec	Not prec	FALSE	TRUE	WRKY		WRKY family transcription factor (AHRD V1 *-*- D7LBR5_ARALY); contains Interpro domain(s) IPR003657 DNA-binding WRKY
Solyc09g061940.1.1	1	1	TM	Nbenth	Prec	Not prec	FALSE	TRUE			Receptor like kinase, RLK
Solyc08g080210.2.1	1	1	TM	Nbenth	Prec	Not prec	FALSE	FALSE			DNA-directed RNA polymerase (AHRD V1 ***- B9GKP9_POPTR); contains Interpro domain(s) IPR000722 RNA polymerase, alpha subunit
Solyc08g080520.2.1	1	1	TM	Nbenth	Prec	Not prec	FALSE	TRUE			AT5g06970/MOJ9_14 (AHRD V1 **-- Q8RX56_ARATH); contains Interpro domain(s) IPR008528 Protein of unknown function DUF810
Solyc03g006880.2.1	1	1	TM	Nbenth	Prec	Not prec	FALSE	TRUE			Gibberellin 20-oxidase-1 (AHRD V1 **** Q9ZPP4_SOLLC); contains Interpro domain(s) IPR005123 Oxoglutarate and iron-dependent oxygenase
Solyc06g048600.2.1	1	1	TM	Nbenth	Prec	Not prec	FALSE	TRUE			Two-component response regulator ARR3 (AHRD V1 **** B6TSM4_MAIZE); contains Interpro domain(s) IPR001789 Signal transduction response regulator, receiver region
Solyc04g071990.2.1	1	1	TM	Nbenth	Prec	Not prec	FALSE	TRUE			Tomato GIGANTEA 1
Solyc02g071220.2.1	1	1	TM	Nbenth	Prec	Not prec	FALSE	FALSE		GO:0003700	Response regulator 5 (AHRD V1 ***- Q9FRZ0_MAIZE); contains Interpro domain(s) IPR001789 Signal transduction response regulator, receiver region
Solyc01g109150.2.1	1	1	TM	Nbenth	Prec	Not prec	FALSE	TRUE			cytochrome P450
Solyc07g042270.2.1	1	1	TM	Nbenth	Prec	Not prec	FALSE	FALSE			ATP-dependent RNA helicase (AHRD V1 **** C6LZE8_GIALA); contains Interpro domain(s) IPR011545 DNA/RNA helicase, DEAD/DEAH box type, N-terminal
Solyc06g068590.2.1	1	1	TM	Nbenth	Prec	Not prec	FALSE	TRUE			Serine/threonine protein kinase (AHRD V1 *-*- Q16PN5_AEDAE); contains Interpro domain(s) IPR002290 Serine/threonine protein kinase
Solyc07g043310.2.1	1	1	TM	Nbenth	Prec	Not prec	FALSE	FALSE			Aminotransferase (AHRD V1 ***- D2KZ08_WHEAT); contains Interpro domain(s) IPR005814 Aminotransferase class-III
Solyc07g042550.2.1	1	1	TM	Nbenth	Prec	Not prec	FALSE	TRUE			Sucrose synthase (AHRD V1 **** O82691_SOLLC); contains Interpro domain(s) IPR012820 Sucrose synthase, plants and cyanobacteria IPR000368 Sucrose synthase
Solyc01g091040.2.1	1	1	TM	Nbenth	Prec	Not prec	FALSE	TRUE			Cysteine-rich repeat secretory protein 15 (AHRD V1 ***- CRR15_ARATH); contains Interpro domain(s) IPR002902 Protein of unknown function DUF26
Solyc07g006020.2.1	1	1	TM	Nbenth	Prec	Not prec	FALSE	TRUE			Adiponectin receptor (AHRD V1 **** Q16FL3_AEDAE); contains Interpro domain(s) IPR004254 Hly-III related
Solyc09g042660.2.1	1	1	TM	Nbenth	Prec	Not prec	FALSE	TRUE			CBL-interacting protein kinase 22 (AHRD V1 **** A0MNK8_POPTR); contains Interpro domain(s) IPR002290 Serine/threonine protein kinase
Solyc04g014360.2.1	1	1	TM	Nbenth	Prec	Not prec	FALSE	TRUE	bHLH	GO:0003700	Transcription factor SPATULA (AHRD V1 *-** SPT_ARATH); contains Interpro domain(s) IPR001092 Basic helix-loop-helix dimerisation region bHLH
Solyc12g036650.1.1	1	1	TM	Nbenth	Prec	Not prec	FALSE	FALSE			Unknown Protein (AHRD V1)
Solyc04g082170.2.1	1	1	TM	Nbenth	Prec	Not prec	FALSE	TRUE			Alcohol dehydrogenase 1 (AHRD V1 **** B6TD57_MAIZE); contains Interpro domain(s) IPR002085 Alcohol dehydrogenase superfamily, zinc-containing
Solyc09g014900.2.1	1	1	TM	Nbenth	Prec	Not prec	FALSE	TRUE			Cytochrome P450
Solyc08g008310.2.1	1	1	TM	Nbenth	Prec	Not prec	FALSE	TRUE			Long-chain-fatty-acid-CoA ligase (AHRD V1 **** B2WS80_ARAHA); contains Interpro domain(s) IPR000873 AMP-dependent synthetase and ligase
Solyc06g062960.1.1	1	1	TM	Nbenth	Prec	Not prec	FALSE	TRUE			Unknown Protein (AHRD V1); contains Interpro domain(s) IPR012876 Protein of unknown function DUF1677, plant
Solyc12g008530.1.1	1	1	TM	Nbenth	Prec	Not prec	FALSE	TRUE			Pectinesterase (AHRD V1 ***- B9RKG6_RICCO); contains Interpro domain(s) IPR000070 Pectinesterase, catalytic
Solyc06g051190.1.1	1	1	TM	Nbenth	Prec	Not prec	FALSE	FALSE			RNA-dependent RNA polymerase family protein (AHRD V1 ***- D7L6F5_ARALY); contains Interpro domain(s) IPR007855 RNA-dependent RNA polymerase, eukaryotic-type
Solyc05g047710.2.1	1	1	TM	Nbenth	Prec	Not prec	FALSE	TRUE			Plant synaptotagmin (AHRD V1 **-- C5X3E4_SORBI); contains Interpro domain(s) IPR018029 C2 membrane targeting protein
Solyc06g083130.2.1	1	1	TM	Nbenth	Prec	Not prec	FALSE	FALSE			MazG nucleotide pyrophosphohydrolase (AHRD V1 ***- C4ZJP2_THASP); contains Interpro domain(s) IPR011394 NTP Pyrophosphohydrolase MazG-related, RS21-C6
Solyc09g074230.2.1	1	2	FM	Can	Not prec	Not prec	FALSE	TRUE			Glucose transporter 8 (AHRD V1 **** Q2KKJ3_SOLIN); contains Interpro domain(s) IPR003663 Sugar/inositol transporter
Solyc04g072760.2.1	1	2	FM	Can	Not prec	Not prec	FALSE	TRUE			High affinity sulfate transporter 2 (AHRD V1 **** SUT2_STYHA); contains Interpro domain(s) IPR001902 Sulphate anion transporter
Solyc07g006500.2.1	1	2	FM	Can	Not prec	Not prec	FALSE	FALSE			Alpha alpha-trehalose-phosphate synthase (UDP-forming) (AHRD V1 **** D2REU5_ARCPA); contains Interpro domain(s) IPR001830 Glycosyl transferase, family 20
Solyc08g075940.2.1	1	2	FM	Can	Not prec	Not prec	FALSE	FALSE			DNA-directed RNA polymerase (AHRD V1 ***- B9IL57_POPTR); contains Interpro domain(s) IPR015712 DNA-directed RNA polymerase, subunit 2
Solyc08g083050.1.1	1	2	FM	Can	Not prec	Not prec	FALSE	TRUE			Unknown Protein (AHRD V1)
Solyc03g120870.2.1	1	2	FM	Can	Not prec	Not prec	FALSE	TRUE			UPF0497 membrane protein 14 (AHRD V1 ***- U497E_VITVI); contains Interpro domain(s) IPR006459 Uncharacterised protein family UPF0497, trans-membrane plant subgroup
Solyc07g052100.2.1	1	2	FM	Can	Not prec	Not prec	FALSE	TRUE			Chromodomain-helicase-DNA-binding protein 1-like (AHRD V1 *--* CHD1L_DANRE); contains Interpro domain(s) IPR014001 DEAD-like helicase, N-terminal
Solyc04g074850.2.1	1	2	FM	Can	Not prec	Not prec	FALSE	FALSE			Multidrug resistance protein mdtK (AHRD V1 **-- MDTK_YERP3); contains Interpro domain(s) IPR002528 Multi antimicrobial extrusion protein MatE
Solyc04g071620.2.1	1	2	FM	Can	Not prec	Not prec	FALSE	FALSE			ASR4 (Fragment) (AHRD V1 *-*- Q2QJU1_SOLLC); contains Interpro domain(s) IPR003496 ABA/WDS induced protein
Solyc09g075420.2.1	1	2	FM	Can	Not prec	Not prec	FALSE	TRUE	ERF	GO:0003677	Ethylene responsive transcription factor 2b (AHRD V1 *-*- C0J9I6_9ROSA); contains Interpro domain(s) IPR001471 Pathogenesis-related transcriptional factor and ERF, DNA-binding IPR001711 Phospholipase C, phosphatidylinositol-specific, Y domain
Solyc01g080900.2.1	1	2	FM	Can	Not prec	Not prec	FALSE	TRUE			Cytochrome P450
Solyc05g055400.2.1	1	2	FM	Can	Not prec	Not prec	FALSE	TRUE			Cytochrome P450
Solyc04g054990.2.1	1	2	FM	Can	Not prec	Not prec	FALSE	FALSE			Lipoxygenase homology domain-containing protein 1 (AHRD V1 *--- LOXH1_HUMAN); contains Interpro domain(s) IPR001024 Lipoxygenase, LH2
Solyc02g090410.2.1	1	2	FM	Can	Not prec	Not prec	FALSE	TRUE	LBD		LOB domain family protein (AHRD V1 ***- D7LG10_ARALY); contains Interpro domain(s) IPR004883 Lateral organ boundaries, LOB
Solyc01g097540.2.1	1	2	FM	Can	Not prec	Not prec	FALSE	FALSE			Annexin 3 (AHRD V1 ***- A9X4R3_BRAJU); contains Interpro domain(s) IPR015472 Annexin like protein IPR001464 Annexin
Solyc06g007180.2.1	1	2	FM	Can	Not prec	Not prec	FALSE	TRUE			Asparagine synthase (Glutamine-hydrolyzing) (AHRD V1 **** A9EDI4_9FLAO); contains Interpro domain(s) IPR006426 Asparagine synthase, glutamine-hydrolyzing
Solyc02g067440.2.1	1	2	FM	Can	Not prec	Not prec	FALSE	TRUE			Cupin RmlC-type (AHRD V1 **-- B4F886_MAIZE); contains Interpro domain(s) IPR012864 Protein of unknown function DUF1637
Solyc12g094450.1.1	1	2	FM	Can	Not prec	Prec	FALSE	TRUE			Peroxisomal multifunctional enzyme type 2 (AHRD V1 **-- B4FP93_MAIZE); contains Interpro domain(s) IPR002539 MaoC-like dehydratase
Solyc02g090400.2.1	1	2	FM	Can	Not prec	Prec	FALSE	TRUE	G2-like	GO:0003700	Myb family transcription factor (AHRD V1 **-* D7LQI3_ARALY); contains Interpro domain(s) IPR006447 Myb-like DNA-binding region, SHAQKYF class
Solyc08g074480.1.1	1	2	FM	Can	Not prec	Prec	FALSE	TRUE			Cortical cell-delineating protein (AHRD V1 **-- B6UGA2_MAIZE); contains Interpro domain(s) IPR013770 Plant lipid transfer protein and hydrophobic protein, helical
Solyc09g090070.1.1	1	2	FM	Can	Not prec	Prec	FALSE	TRUE			Inorganic phosphate transporter (AHRD V1 **** O22548_SOLLC); contains Interpro domain(s) IPR004738 Phosphate permease
Solyc10g005210.2.1	1	2	FM	Can	Not prec	Prec	FALSE	TRUE			DNA-3-methyladenine glycosylase I (AHRD V1 ***- B4FWT0_MAIZE); contains Interpro domain(s) IPR005019 Methyladenine glycosylase
Solyc12g013700.1.1	1	2	FM	Can	Not prec	Prec	FALSE	FALSE			Aluminum-induced protein-like protein (AHRD V1 ***- Q8S2R9_THEHA)
Solyc07g061730.2.1	1	2	FM	Can	Not prec	Prec	FALSE	FALSE			Gibberellin 2-oxidase (AHRD V1 **** A4GVL9_SOLLC); contains Interpro domain(s) IPR005123 Oxoglutarate and iron-dependent oxygenase
Solyc10g081320.1.1	1	2	FM	Can	Not prec	Prec	FALSE	TRUE	MYB	GO:0003700	MYB transcription factor (AHRD V1 *--* Q9C5P9_ARATH); contains Interpro domain(s) IPR015495 Myb transcription factor
Solyc07g063640.1.1	1	2	FM	Can	Not prec	Prec	FALSE	TRUE			Wound induced protein (AHRD V1 ***- B6SKC8_MAIZE)
Solyc03g006490.2.1	1	2	FM	Can	Not prec	Prec	FALSE	TRUE			Aluminum-induced protein-like (AHRD V1 ***- Q9FG81_ARATH)
Solyc12g006680.1.1	1	2	FM	Can	Not prec	Prec	FALSE	TRUE			Early nodulin 93 protein (AHRD V1 ***- A3FGC9_9ROSI); contains Interpro domain(s) IPR005050 Early nodulin 93 ENOD93 protein
Solyc01g107390.2.1	1	2	FM	Can	Not prec	Prec	FALSE	TRUE			Auxin-responsive GH3 product (AHRD V1 ***- Q05680_SOYBN); contains Interpro domain(s) IPR004993 GH3 auxin-responsive promoter
Solyc05g009740.1.1	1	2	FM	Can	Not prec	Prec	FALSE	TRUE			Nbs-lrr, resistance protein
Solyc07g055780.2.1	1	2	FM	Can	Not prec	Prec	FALSE	TRUE			Os06g0207500 protein (Fragment) (AHRD V1 ***- Q0DDQ9_ORYSJ); contains Interpro domain(s) IPR004253 Protein of unknown function DUF231, plant
Solyc06g083900.2.1	1	2	FM	Can	Not prec	Prec	FALSE	FALSE	MYB	GO:0003700	Myb-related transcription factor (AHRD V1 **-* B2CZJ1_CAPAN); contains Interpro domain(s) IPR015495 Myb transcription factor
Solyc01g094870.1.1	1	2	FM	Can	Not prec	Prec	FALSE	FALSE			MRNA clone RAFL21-92-I07 (AHRD V1 *--- Q681W9_ARATH); contains Interpro domain(s) IPR006461 Protein of unknown function Cys-rich
Solyc03g112160.2.1	1	2	FM	Can	Not prec	Prec	FALSE	FALSE			Protein DEHYDRATION-INDUCED 19 homolog 5 (AHRD V1 ***- DI195_ORYSJ); contains Interpro domain(s) IPR008598 Drought induced 19
Solyc04g014800.2.1	1	2	FM	Can	Not prec	Prec	FALSE	FALSE			L-galactose-1-phosphate phosphatase 2
Solyc12g008400.1.1	1	2	FM	Can	Not prec	Prec	FALSE	FALSE			Receptor like kinase, RLK
Solyc07g061720.2.1	1	2	FM	Can	Not prec	Prec	FALSE	FALSE			Gibberellin 2-oxidase (AHRD V1 **** A4GVL8_SOLLC); contains Interpro domain(s) IPR005123 Oxoglutarate and iron-dependent oxygenase
Solyc08g078670.2.1	1	2	FM	Can	Not prec	Prec	FALSE	FALSE			Aspartyl protease (AHRD V1 **-- B8YIB7_MIRJA); contains Interpro domain(s) IPR001461 Peptidase A1
Solyc07g054770.1.1	1	2	FM	Can	Not prec	Prec	FALSE	TRUE			Wound induced protein (AHRD V1 ***- B6SKC8_MAIZE)
Solyc03g095940.1.1	1	2	FM	Can	Not prec	Prec	FALSE	FALSE	LBD		LOB domain family protein (AHRD V1 ***- D7L9U4_ARALY); contains Interpro domain(s) IPR004883 Lateral organ boundaries, LOB
Solyc05g009270.2.1	1	2	FM	Can	Not prec	Prec	FALSE	TRUE			Fatty acid elongase 3-ketoacyl-CoA synthase (AHRD V1 **** Q6DUV5_BRANA); contains Interpro domain(s) IPR012392 Very-long-chain 3-ketoacyl-CoA synthase
Solyc10g086500.1.1	1	2	FM	Can	Not prec	Prec	FALSE	FALSE			3-oxo-5-alpha-steroid 4-dehydrogenase family protein expressed (AHRD V1 ***- Q53NE6_ORYSJ); contains Interpro domain(s) IPR016636 3-oxo-5-alpha-steroid 4-dehydrogenase IPR001104 3-oxo-5-alpha-steroid 4-dehydrogenase, C-terminal
Solyc12g008840.1.1	1	2	FM	Can	Not prec	Prec	FALSE	FALSE			Beta-galactosidase (AHRD V1 ***- O81100_SOLLC); contains Interpro domain(s) IPR001944 Glycoside hydrolase, family 35
Solyc01g094970.2.1	1	2	FM	Can	Not prec	Prec	FALSE	FALSE			Glycoside hydrolase family 28 protein/polygalacturonase family protein (AHRD V1 **-- Q1PF10_ARATH); contains Interpro domain(s) IPR012334 Pectin lyase fold
Solyc02g087510.2.1	1	2	FM	Can	Not prec	Prec	FALSE	TRUE			Ribosomal protein S6 kinase alpha-2 (AHRD V1 *-** KS6A2_HUMAN); contains Interpro domain(s) IPR002290 Serine/threonine protein kinase
Solyc04g072030.1.1	1	2	FM	Can	Not prec	Prec	FALSE	FALSE			Interferon-induced GTP-binding protein Mx (Fragment) (AHRD V1 *--- MX_PERFL); contains Interpro domain(s) IPR015577 Interferon-induced Mx protein
Solyc04g077050.2.1	1	2	FM	Can	Not prec	Prec	FALSE	TRUE			Amino acid permease 6 (AHRD V1 **** Q7Y076_BRANA); contains Interpro domain(s) IPR013057 Amino acid transporter, transmembrane
Solyc02g065290.1.1	1	2	FM	Can	Not prec	Prec	FALSE	FALSE	Dof	GO:0003700	Dof zinc finger protein 6 (AHRD V1 *-*- A5HWF5_HORVD); contains Interpro domain(s) IPR003851 Zinc finger, Dof-type
Solyc07g055270.1.1	1	2	FM	Can	Not prec	Prec	FALSE	TRUE			Unknown Protein (AHRD V1)
Solyc06g068550.2.1	1	2	FM	Can	Not prec	Prec	FALSE	FALSE			Aspartic proteinase nepenthesin-1 (AHRD V1 **-- C0JAB4_ORYCO); contains Interpro domain(s) IPR001461 Peptidase A1
Solyc12g009680.1.1	1	2	FM	Can	Not prec	Prec	FALSE	TRUE			Adiponectin receptor protein 2 (AHRD V1 ***- B0W6M8_CULQU); contains Interpro domain(s) IPR004254 Hly-III related
Solyc07g054790.1.1	1	2	FM	Can	Not prec	Prec	FALSE	TRUE			Wound induced protein (AHRD V1 ***- B6U0P9_MAIZE)
Solyc01g108910.2.1	1	2	FM	Can	Not prec	Prec	FALSE	FALSE			COSII_At2g15890 (Fragment) (AHRD V1 *-*- C0KFD9_9SOLN)
Solyc10g005320.2.1	1	2	FM	Can	Not prec	Prec	FALSE	TRUE			Tryptophan synthase beta chain 1 (AHRD V1 **** Q0WUI8_ARATH); contains Interpro domain(s) IPR006654 Tryptophan synthase, beta chain
Solyc08g077210.2.1	1	2	FM	Can	Not prec	Prec	FALSE	TRUE			Inositol 1 4 5-trisphosphate 5-phosphatase (AHRD V1 *-** Q712G2_ARATH); contains Interpro domain(s) IPR000300 Inositol polyphosphate related phosphatase
Solyc11g066130.1.1	1	2	FM	Can and Nbenth	Not prec	Not prec	FALSE	FALSE			Thaumatin-like protein (AHRD V1 **-- D2KU75_CITJA); contains Interpro domain(s) IPR017949 Thaumatin, conserved site IPR001938 Thaumatin, pathogenesis-related
Solyc04g063210.2.1	1	2	FM	Can and Nbenth	Not prec	Not prec	FALSE	TRUE			Caffeoyl-CoA O-methyltransferase (AHRD V1 **** A0SDG2_9CONI); contains Interpro domain(s) IPR002935 O-methyltransferase, family 3
Solyc04g008060.2.1	1	2	FM	Can and Nbenth	Not prec	Not prec	FALSE	TRUE			Vacuolar iron transporter Ccc1 (AHRD V1 **-* C5GIS5_AJEDR); contains Interpro domain(s) IPR008217 Protein of unknown function DUF125, transmembrane
Solyc12g006860.1.1	1	2	FM	Can and Nbenth	Not prec	Not prec	FALSE	TRUE			Cytochrome P450
Solyc04g074080.2.1	1	2	FM	Can and Nbenth	Not prec	Not prec	FALSE	FALSE			WW domain containing protein expressed (AHRD V1 *-*- Q2QVE4_ORYSJ); contains Interpro domain(s) IPR001202 WW/Rsp5/WWP
Solyc10g083730.1.1	1	2	FM	Can and Nbenth	Not prec	Not prec	FALSE	FALSE			F-box protein PP2-B1 (AHRD V1 *-*- PP2B1_ARATH); contains Interpro domain(s) IPR001810 Cyclin-like F-box
Solyc02g079190.2.1	1	2	FM	Can and Nbenth	Not prec	Not prec	FALSE	TRUE			Auxin F-box protein 5 (AHRD V1 **-- D7MPH1_ARALY); contains Interpro domain(s) IPR001810 Cyclin-like F-box
Solyc03g116900.2.1	1	2	FM	Can and Nbenth	Not prec	Not prec	FALSE	TRUE			Manganese transporter MntH (AHRD V1 **-* D3KPZ0_LISMO); contains Interpro domain(s) IPR001046 Natural resistance-associated macrophage protein
Solyc09g009260.2.1	1	2	FM	Can and Nbenth	Not prec	Not prec	FALSE	TRUE			Fructose-bisphosphate aldolase (AHRD V1 ***- Q2PYX3_SOLTU); contains Interpro domain(s) IPR000741 Fructose-bisphosphate aldolase, class-I
Solyc12g005990.1.1	1	2	FM	Can and Nbenth	Not prec	Not prec	FALSE	TRUE			Dual specificity protein phosphatase 4 (AHRD V1 ***- B6U4B9_MAIZE); contains Interpro domain(s) IPR020422 Dual specificity phosphatase, subgroup, catalytic domain
Solyc06g053480.2.1	1	2	FM	Can and Nbenth	Not prec	Not prec	FALSE	TRUE			Stearoyl-acyl carrier protein desaturase (AHRD V1 **** B7TZ44_SPIOL); contains Interpro domain(s) IPR005067 Fatty acid desaturase, type 2
Solyc02g082170.1.1	1	2	FM	Can and Nbenth	Not prec	Not prec	FALSE	FALSE			Purine permease (AHRD V1 *--* B6TET5_MAIZE); contains Interpro domain(s) IPR004853 Protein of unknown function DUF250
Solyc01g090460.2.1	1	2	FM	Can and Nbenth	Not prec	Not prec	FALSE	FALSE	HD-ZIP		Homeobox-leucine zipper protein (AHRD V1 *-*- Q39862_SOYBN); contains Interpro domain(s) IPR001356 Homeobox IPR017970 Homeobox, conserved site
Solyc07g062820.1.1	1	2	FM	Can and Nbenth	Not prec	Not prec	FALSE	TRUE			Pentatricopeptide repeat protein PPR1106-17 (AHRD V1 ***- B6SWY6_MAIZE); contains Interpro domain(s) IPR002885 Pentatricopeptide repeat
Solyc11g016970.1.1	1	2	FM	Can and Nbenth	Not prec	Not prec	FALSE	FALSE			Multidrug resistance protein mdtK (AHRD V1 *-*- MDTK_ENTS8); contains Interpro domain(s) IPR002528 Multi antimicrobial extrusion protein MatE
Solyc04g082870.1.1	1	2	FM	Can and Nbenth	Not prec	Not prec	FALSE	FALSE			Pentatricopeptide repeat-containing protein (AHRD V1 ***- D7KAJ5_ARALY); contains Interpro domain(s) IPR002885 Pentatricopeptide repeat
Solyc01g099910.2.1	1	2	FM	Can and Nbenth	Not prec	Not prec	FALSE	TRUE			Epoxide hydrolase (AHRD V1 ***- B3VMR4_NICBE); contains Interpro domain(s) IPR000639 Epoxide hydrolase-like
Solyc12g006850.1.1	1	2	FM	Can and Nbenth	Not prec	Not prec	FALSE	FALSE			Potassium channel (AHRD V1 ***- Q9LEG6_SOLLC); contains Interpro domain(s) IPR002110 Ankyrin
Solyc03g114460.2.1	1	2	FM	Can and Nbenth	Not prec	Not prec	FALSE	TRUE			Acetyl-coenzyme A synthetase (AHRD V1 ***- D5HA95_SALRM); contains Interpro domain(s) IPR000873 AMP-dependent synthetase and ligase
Solyc02g087620.2.1	1	2	FM	Can and Nbenth	Not prec	Not prec	FALSE	TRUE			Inositol hexakisphosphate and diphosphoinositol-pentakisphosphate kinase 2 (AHRD V1 **-* VIP2_MOUSE); contains Interpro domain(s) IPR000560 Histidine acid phosphatase
Solyc11g009050.1.1	1	2	FM	Can and Nbenth	Not prec	Not prec	FALSE	TRUE			F-box protein-like (AHRD V1 ***- Q67X80_ORYSJ); contains Interpro domain(s) IPR001810 Cyclin-like F-box
Solyc01g102470.2.1	1	2	FM	Can and Nbenth	Not prec	Not prec	FALSE	FALSE			Pentatricopeptide repeat-containing protein (AHRD V1 *-*- D7MEW5_ARALY); contains Interpro domain(s) IPR002885 Pentatricopeptide repeat
Solyc03g123610.2.1	1	2	FM	Can and Nbenth	Not prec	Not prec	FALSE	TRUE			Alanine aminotransferase (AHRD V1 ***- Q6VEJ5_CAPAN); contains Interpro domain(s) IPR004839 Aminotransferase, class I and II
Solyc10g076510.1.1	1	2	FM	Can and Nbenth	Not prec	Not prec	FALSE	TRUE			Pyruvate decarboxylase (AHRD V1 **** B0ZS79_PRUAR); contains Interpro domain(s) IPR012110 Pyruvate decarboxylase/indolepyruvate decarboxylase
Solyc01g107980.2.1	1	2	FM	Can and Nbenth	Not prec	Not prec	FALSE	TRUE			U-box domain-containing protein (AHRD V1 ***- A8IXJ0_BRACM); contains Interpro domain(s) IPR011989 Armadillo-like helical
Solyc01g111880.2.1	1	2	FM	Can and Nbenth	Not prec	Not prec	FALSE	TRUE			Tyrosine-protein kinase transforming protein Src (AHRD V1 *-** SRC_AVIST); contains Interpro domain(s) IPR015783 ATMRK serine/threonine protein kinase-like
Solyc09g072630.2.1	1	2	FM	Can and Nbenth	Not prec	Not prec	FALSE	TRUE			LRR receptor-like serine/threonine-protein kinase, RLP
Solyc06g048410.2.1	1	2	FM	Can and Nbenth	Not prec	Not prec	FALSE	TRUE			Superoxide dismutase (AHRD V1 **** Q7YK44_SOLLC); contains Interpro domain(s) IPR019833 Manganese/iron superoxide dismutase, binding site IPR001189 Manganese/iron superoxide dismutase
Solyc04g076830.2.1	1	2	FM	Can and Nbenth	Not prec	Not prec	FALSE	TRUE			Phosphoglycerate mutase-like protein (AHRD V1 ***- Q8LGT8_SOYBN); contains Interpro domain(s) IPR013078 Phosphoglycerate mutase
Solyc01g010970.2.1	1	2	FM	Can and Nbenth	Not prec	Not prec	FALSE	FALSE			ARGONAUTE 1 (AHRD V1 ***- D6RUV9_TOBAC); contains Interpro domain(s) IPR003165 Stem cell self-renewal protein Piwi
Solyc08g074630.1.1	1	2	FM	Can and Nbenth	Not prec	Not prec	FALSE	FALSE			Polyphenol oxidase (AHRD V1 ***- Q41428_SOLTU); contains Interpro domain(s) IPR016213 Polyphenol oxidase, plant
Solyc02g068410.1.1	1	2	FM	Can and Nbenth	Not prec	Not prec	FALSE	FALSE			AT4G20050-like protein (Fragment) (AHRD V1 *-*- D6PQZ2_9BRAS); contains Interpro domain(s) IPR011050 Pectin lyase fold/virulence factor
Solyc08g063040.2.1	1	2	FM	Can and Nbenth	Not prec	Not prec	FALSE	TRUE	C2H2		Zinc finger protein (AHRD V1 *-*- Q9LVQ7_ARATH); contains Interpro domain(s) IPR007087 Zinc finger, C2H2-type
Solyc10g005000.2.1	1	2	FM	Can and Nbenth	Not prec	Not prec	FALSE	TRUE			Os03g0648300 protein (Fragment) (AHRD V1 *--- Q0DPZ6_ORYSJ); contains Interpro domain(s) IPR000048 IQ calmodulin-binding region
Solyc11g071480.1.1	1	2	FM	Can and Nbenth	Not prec	Not prec	FALSE	TRUE			Hydroxycinnamoyl CoA shikimate/quinate hydroxycinnamoyltransferase-like protein (Fragment) (AHRD V1 **-- B9GF60_POPTR); contains Interpro domain(s) IPR003480 Transferase
Solyc04g078540.2.1	1	2	FM	Can and Nbenth	Not prec	Prec	FALSE	FALSE			Cathepsin B-like cysteine proteinase (AHRD V1 **-* CYSP_SCHMA); contains Interpro domain(s) IPR013128 Peptidase C1A, papain
Solyc07g063940.1.1	1	2	FM	Can and Nbenth	Not prec	Prec	FALSE	FALSE	GRAS	GO:0003700	GRAS family transcription factor (AHRD V1 **-* B9I7E1_POPTR); contains Interpro domain(s) IPR005202 GRAS transcription factor
Solyc08g083210.2.1	1	2	FM	Can and Nbenth	Not prec	Prec	FALSE	TRUE			Endoglucanase 1 (AHRD V1 ***- B6U0P7_MAIZE); contains Interpro domain(s) IPR001701 Glycoside hydrolase, family 9
Solyc04g080290.2.1	1	2	FM	Can and Nbenth	Not prec	Prec	FALSE	FALSE			CRAL/TRIO domain containing protein expressed (AHRD V1 **-- Q75GU9_ORYSJ); contains Interpro domain(s) IPR001251 Cellular retinaldehyde-binding/triple function, C-terminal
Solyc02g081120.2.1	1	2	FM	Can and Nbenth	Not prec	Prec	FALSE	TRUE	TALE		Knotted-1-like homeobox protein H1 (AHRD V1 ***- Q8GUS6_TOBAC); contains Interpro domain(s) IPR005541 KNOX2
Solyc02g081010.1.1	1	2	FM	Can and Nbenth	Not prec	Prec	FALSE	TRUE		GO:0003700	Transcription factor jumonji domain-containing protein (AHRD V1 **-* D7KN75_ARALY); contains Interpro domain(s) IPR013129 Transcription factor jumonji
Solyc04g071890.2.1	1	2	FM	Can and Nbenth	Not prec	Prec	FALSE	FALSE			Peroxidase 4 (AHRD V1 **** B7UCP4_LITCN); contains Interpro domain(s) IPR002016 Haem peroxidase, plant/fungal/bacterial
Solyc04g082880.2.1	1	2	FM	Can and Nbenth	Not prec	Prec	FALSE	TRUE			Diphosphate--fructose-6-phosphate 1-phosphotransferase (AHRD V1 ***- C8PT93_9SPIO); contains Interpro domain(s) IPR011183 Pyrophosphate-dependent phosphofructokinase PfpB
Solyc06g068540.2.1	1	2	FM	Can and Nbenth	Not prec	Prec	FALSE	FALSE			Transcription regulatory protein SNF5 (AHRD V1 *-*- D3B6R9_POLPA)
Solyc08g083230.1.1	1	2	FM	Can and Nbenth	Not prec	Prec	FALSE	FALSE	GRF		Growth-regulating factor 3 (AHRD V1 *--- Q6AWY6_ORYSJ); contains Interpro domain(s) IPR014977 WRC
Solyc07g042170.2.1	1	2	FM	Can and Nbenth	Not prec	Prec	FALSE	TRUE			Jasmonate ZIM-domain protein 3 (AHRD V1 **-- B3Y563_TOBAC); contains Interpro domain(s) IPR010399 Tify
Solyc01g006400.2.1	1	2	FM	Can and Nbenth	Not prec	Prec	FALSE	TRUE			Cysteine-rich extensin-like protein-4 (AHRD V1 *-*- Q08197_TOBAC)
Solyc02g088340.2.1	1	2	FM	Can and Nbenth	Not prec	Prec	FALSE	FALSE	WRKY	GO:0003700	WRKY transcription factor-c (AHRD V1 **** Q5DJV3_CAPAN); contains Interpro domain(s) IPR003657 DNA-binding WRKY
Solyc11g010710.1.1	1	2	FM	Can and Nbenth	Not prec	Prec	FALSE	FALSE	AP2	GO:0003677_GO:0006355	AP2-like ethylene-responsive transcription factor At1g16060 (AHRD V1 *-*- AP2L1_ARATH); contains Interpro domain(s) IPR001471 Pathogenesis-related transcriptional factor and ERF, DNA-binding
Solyc10g080690.1.1	1	2	FM	Can and Nbenth	Not prec	Prec	FALSE	TRUE			Patatin-like protein 3 (AHRD V1 ***- B6TPQ5_MAIZE); contains Interpro domain(s) IPR002641 Patatin
Solyc06g075150.2.1	1	2	FM	Can and Nbenth	Not prec	Prec	FALSE	FALSE	ARF		Auxin response factor 16 (AHRD V1 ***- D9IVB4_SOLLC); contains Interpro domain(s) IPR010525 Auxin response factor
Solyc01g008110.2.1	1	2	FM	Can and Nbenth	Not prec	Prec	FALSE	TRUE			Cytochrome P450
Solyc12g010910.1.1	1	2	FM	Can and Nbenth	Not prec	Prec	FALSE	TRUE			Lipase (Fragment) (AHRD V1 ***- Q9ZTW1_DIACA); contains Interpro domain(s) IPR002921 Lipase, class 3
Solyc07g047960.2.1	1	2	FM	Can and Nbenth	Not prec	Prec	FALSE	FALSE	WRKY	GO:0003700	WRKY transcription factor 2 (AHRD V1 **** C9DHZ1_9ROSI); contains Interpro domain(s) IPR003657 DNA-binding WRKY
Solyc08g076670.2.1	1	2	FM	Can and Nbenth	Not prec	Prec	FALSE	TRUE			Transmembrane protein 41B (AHRD V1 **-- TM41B_HUMAN); contains Interpro domain(s) IPR015414 SNARE associated Golgi protein
Solyc05g005150.1.1	1	2	FM	Can and Nbenth	Not prec	Prec	FALSE	FALSE			F-box/Kelch repeat-containing F-box family protein (AHRD V1 ***- C4PVT9_ARATH); contains Interpro domain(s) IPR015915 Kelch-type beta propeller
Solyc03g097940.2.1	1	2	FM	Can and Nbenth	Not prec	Prec	FALSE	FALSE			Potassium channel (AHRD V1 **** O04242_MAIZE); contains Interpro domain(s) IPR002110 Ankyrin
Solyc08g005560.2.1	1	2	FM	Can and Nbenth	Not prec	Prec	FALSE	FALSE			Binding protein (AHRD V1 ***- D7MGU4_ARALY)
Solyc04g007340.2.1	1	2	FM	Can and Nbenth	Not prec	Prec	FALSE	FALSE			Unknown Protein (AHRD V1); contains Interpro domain(s) IPR012438 Protein of unknown function DUF1639
Solyc07g007330.1.1	1	2	FM	Can and Nbenth	Not prec	Prec	FALSE	FALSE			Serine-rich protein (AHRD V1 ***- A1YMW6_BRACM)
Solyc01g079480.2.1	1	2	FM	Can and Nbenth	Not prec	Prec	FALSE	TRUE	bZIP	GO:0003700	BZIP transcription factor (AHRD V1 **-* Q1HW69_CAPAN); contains Interpro domain(s) IPR011616 bZIP transcription factor, bZIP-1
Solyc02g086180.2.1	1	2	FM	Can and Nbenth	Not prec	Prec	FALSE	FALSE			Sterol C-5 desaturase (AHRD V1 **** D7FW86_ECTSI); contains Interpro domain(s) IPR006694 Fatty acid hydroxylase
Solyc10g085740.1.1	1	2	FM	Can and Nbenth	Not prec	Prec	FALSE	FALSE			GDSL esterase/lipase At5g03820 (AHRD V1 ***- GDL73_ARATH); contains Interpro domain(s) IPR001087 Lipase, GDSL
Solyc01g110570.2.1	1	2	FM	Can and Nbenth	Not prec	Prec	FALSE	TRUE			Auxin-induced SAUR-like protein (AHRD V1 **-- Q8S349_CAPAN); contains Interpro domain(s) IPR003676 Auxin responsive SAUR protein
Solyc01g105280.2.1	1	2	FM	Can and Nbenth	Not prec	Prec	FALSE	FALSE			Protein phosphatase 2C-like (AHRD V1 ***- A2Q6E4_MEDTR); contains Interpro domain(s) IPR015655 Protein phosphatase 2C
Solyc04g076630.2.1	1	2	FM	Can and Nbenth	Not prec	Prec	FALSE	FALSE			Rhamnogalacturonate lyase (AHRD V1 **** A3XLZ2_LEEBM); contains Interpro domain(s) IPR010325 Rhamnogalacturonate lyase
Solyc01g096080.2.1	1	2	FM	Can and Nbenth	Not prec	Prec	FALSE	FALSE			Unknown Protein (AHRD V1)
Solyc01g096100.2.1	1	2	FM	Can and Nbenth	Not prec	Prec	FALSE	FALSE			AT2G46550 protein (Fragment) (AHRD V1 ***- B9DHY8_ARATH)
Solyc04g081240.2.1	1	2	FM	Can and Nbenth	Not prec	Prec	FALSE	FALSE	ARF		Auxin response factor 5 (AHRD V1 ***- D9IVB5_SOLLC); contains Interpro domain(s) IPR010525 Auxin response factor
Solyc04g050960.2.1	1	2	FM	Can and Nbenth	Not prec	Prec	FALSE	FALSE			Chromatin remodeling complex subunit (AHRD V1 *--- B9N3S4_POPTR); contains Interpro domain(s) IPR012287 Homeodomain-related
Solyc11g011310.1.1	1	2	FM	Can and Nbenth	Not prec	Prec	FALSE	TRUE			Rhamnogalacturonate lyase (AHRD V1 ***- A3XLZ2_LEEBM); contains Interpro domain(s) IPR010325 Rhamnogalacturonate lyase
Solyc03g033330.2.1	1	2	FM	Can and Nbenth	Not prec	Prec	FALSE	FALSE			RING finger protein 44 (AHRD V1 *-*- RNF44_MOUSE); contains Interpro domain(s) IPR018957 Zinc finger, C3HC4 RING-type
Solyc04g077860.2.1	1	2	FM	Can and Nbenth	Not prec	Prec	FALSE	FALSE			Hydrolase alpha/beta fold family protein expressed (AHRD V1 **** Q10J20_ORYSJ); contains Interpro domain(s) IPR000073 Alpha/beta hydrolase fold-1
Solyc06g073730.1.1	1	2	FM	Can and Nbenth	Not prec	Prec	FALSE	FALSE	EIL	GO:0003700	Ethylene insensitive 3 class transcription factor (AHRD V1 **** D5L146_MALDO); contains Interpro domain(s) IPR006957 Ethylene insensitive 3
Solyc01g110350.2.1	1	2	FM	Can and Nbenth	Not prec	Prec	FALSE	TRUE			Unknown Protein (AHRD V1)
Solyc02g063450.2.1	1	2	FM	Can and Nbenth	Not prec	Prec	FALSE	FALSE			Hypothetical YFW family protein 5 (AHRD V1 *--- Q5AP84_CANAL); contains Interpro domain(s) IPR009836 Protein of unknown function DUF1399
Solyc05g010590.2.1	1	2	FM	Can and Nbenth	Not prec	Prec	FALSE	TRUE			WPP domain-interacting tail-anchored protein 2 (AHRD V1 ***- WIT2_ARATH)
Solyc03g117600.2.1	1	2	FM	Can and Nbenth	Not prec	Prec	FALSE	FALSE			Hydroxycinnamoyl-CoA shikimate/quinate hydroxycinnamoyltransferase (AHRD V1 **-* A4ZKI0_COFAR); contains Interpro domain(s) IPR003480 Transferase
Solyc02g081830.2.1	1	2	FM	Can and Nbenth	Prec	Not prec	FALSE	TRUE			HAD-superfamily hydrolase (AHRD V1 ***- D5A3P4_SPIPL); contains Interpro domain(s) IPR011949 HAD-superfamily hydrolase, subfamily IA, REG-2-like
Solyc07g055210.2.1	1	2	FM	Can and Nbenth	Prec	Not prec	FALSE	TRUE			Aspartate aminotransferase (AHRD V1 ***- B9SW33_RICCO); contains Interpro domain(s) IPR000796 Aspartate/other aminotransferase
Solyc09g098290.2.1	1	2	FM	Can and Nbenth	Prec	Not prec	FALSE	TRUE			Receptor like kinase, RLK
Solyc04g076960.2.1	1	2	FM	Can and Nbenth	Prec	Not prec	FALSE	FALSE			Sucrose transporter (AHRD V1 **** Q9FVJ6_SOLLC); contains Interpro domain(s) IPR005989 Sucrose/H+ symporter, plant
Solyc04g015560.2.1	1	2	FM	Can and Nbenth	Prec	Not prec	FALSE	FALSE			Beta-D-glucosidase (AHRD V1 ***- Q7XAS3_GOSHI); contains Interpro domain(s) IPR001764 Glycoside hydrolase, family 3, N-terminal
Solyc04g009810.2.1	1	2	FM	Can and Nbenth	Prec	Not prec	FALSE	TRUE			Pelota homolog (AHRD V1 ***- C3KIY5_ANOFI); contains Interpro domain(s) IPR004405 Probable translation factor pelota
Solyc01g079880.2.1	1	2	FM	Can and Nbenth	Prec	Not prec	FALSE	TRUE			Asparagine synthetase (AHRD V1 *--- Q9ZST6_ARATH)
Solyc02g080220.2.1	1	2	FM	Can and Nbenth	Prec	Not prec	FALSE	TRUE			Pectinesterase (AHRD V1 ***- B9RXQ4_RICCO); contains Interpro domain(s) IPR000070 Pectinesterase, catalytic
Solyc03g117300.2.1	1	2	FM	Can and Nbenth	Prec	Not prec	FALSE	FALSE			Nodulin-like protein (AHRD V1 ***- Q8H6R3_PONTR); contains Interpro domain(s) IPR010658 Nodulin-like
Solyc12g005020.1.1	1	2	FM	Can and Nbenth	Prec	Not prec	FALSE	TRUE			Ring H2 finger protein (AHRD V1 *-*- D9ZHD8_HYPPE); contains Interpro domain(s) IPR018957 Zinc finger, C3HC4 RING-type
Solyc08g066100.2.1	1	2	FM	Can and Nbenth	Prec	Not prec	FALSE	TRUE			Phosphofructokinase family protein (AHRD V1 ***- D7MLU4_ARALY); contains Interpro domain(s) IPR012004 Pyrophosphate-dependent phosphofructokinase TP0108
Solyc11g010950.1.1	1	2	FM	Can and Nbenth	Prec	Not prec	FALSE	TRUE			Elongator complex protein 4 (AHRD V1 ***- ELP4_BOVIN); contains Interpro domain(s) IPR008728 Elongator complex protein 4
Solyc08g080570.2.1	1	2	FM	Can and Nbenth	Prec	Not prec	FALSE	FALSE			UDP-glucose 4-epimerase (AHRD V1 **** B0M3E8_PEA); contains Interpro domain(s) IPR005886 UDP-glucose 4-epimerase
Solyc04g058180.2.1	1	2	FM	Can and Nbenth	Prec	Not prec	FALSE	TRUE			Dehydration-responsive family protein (AHRD V1 **-- D7LDR4_ARALY); contains Interpro domain(s) IPR004159 Protein of unknown function DUF248, methyltransferase putative
Solyc03g119530.2.1	1	2	FM	Can and Nbenth	Prec	Not prec	FALSE	FALSE	LBD		LOB domain protein 42 (AHRD V1 ***- D7KWD0_ARALY); contains Interpro domain(s) IPR004883 Lateral organ boundaries, LOB
Solyc03g117980.2.1	1	2	FM	Can and Nbenth	Prec	Not prec	FALSE	TRUE			Respiratory burst oxidase-like protein (AHRD V1 **** C1IHQ9_9ROSI); contains Interpro domain(s) IPR013121 Ferric reductase, NAD binding
Solyc01g067510.2.1	1	2	FM	Can and Nbenth	Prec	Not prec	FALSE	TRUE			Receptor-like kinase (AHRD V1 **** A7VM36_MARPO); contains Interpro domain(s) IPR002290 Serine/threonine protein kinase
Solyc02g090730.2.1	1	2	FM	Can and Nbenth	Prec	Not prec	FALSE	FALSE			Cell number regulator 1 (AHRD V1 **-- B6TZ45_MAIZE); contains Interpro domain(s) IPR006461 Protein of unknown function Cys-rich
Solyc11g012130.1.1	1	2	FM	Can and Nbenth	Prec	Not prec	FALSE	FALSE			Blue copper protein (AHRD V1 *--- B6U7P6_MAIZE); contains Interpro domain(s) IPR008972 Cupredoxin
Solyc04g049920.2.1	1	2	FM	Can and Nbenth	Prec	Not prec	FALSE	TRUE			RNA binding protein-like (AHRD V1 **-- Q8LFQ5_ARATH); contains Interpro domain(s) IPR000504 RNA recognition motif, RNP-1
Solyc07g062810.2.1	1	2	FM	Can and Nbenth	Prec	Not prec	FALSE	TRUE			Branched-chain amino acid aminotransferase-like (AHRD V1 **** Q5NAM3_ORYSJ); contains Interpro domain(s) IPR001544 Aminotransferase, class IV
Solyc12g096110.1.1	1	2	FM	Can and Nbenth	Prec	Not prec	FALSE	FALSE			Protein BREVIS RADIX (AHRD V1 ***- BRX_ARATH); contains Interpro domain(s) IPR013591 Disease resistance/zinc finger/chromosome condensation-like region
Solyc06g065630.2.1	1	2	FM	Can and Nbenth	Prec	Not prec	FALSE	TRUE			Monooxygenase (AHRD V1 **** B5GNT3_STRCL); contains Interpro domain(s) IPR000103 Pyridine nucleotide-disulphide oxidoreductase, class-II
Solyc12g007160.1.1	1	2	FM	Can and Nbenth	Prec	Prec	TRUE	TRUE			Protein ABIL1 (AHRD V1 *--- B6TCZ2_MAIZE)
Solyc07g066230.2.1	1	2	FM	Can and Nbenth	Prec	Prec	TRUE	TRUE			Receptor like kinase, RLK
Solyc00g050430.2.1	1	2	FM	Can and Nbenth	Prec	Prec	TRUE	TRUE	bHLH		BHLH transcription factor (AHRD V1 *-*- A9YWR2_MEDTR); contains Interpro domain(s) IPR011598 Helix-loop-helix DNA-binding
Solyc02g083250.2.1	1	2	FM	Can and Nbenth	Prec	Prec	TRUE	FALSE			Cellular retinaldehyde-binding/triple function C-terminal (AHRD V1 **-- B6SN40_MAIZE); contains Interpro domain(s) IPR001251 Cellular retinaldehyde-binding/triple function, C-terminal
Solyc02g081670.1.1	1	2	FM	Can and Nbenth	Prec	Prec	TRUE	TRUE			Fimbriata (Fragment) (AHRD V1 **-- Q6QVW9_MIMLE); contains Interpro domain(s) IPR001810 Cyclin-like F-box
Solyc03g121060.2.1	1	2	FM	Can and Nbenth	Prec	Prec	TRUE	TRUE		GO:0003700	Auxin response factor 9 (AHRD V1 *-** ARFI_ARATH); contains Interpro domain(s) IPR003311 AUX/IAA protein
Solyc05g005810.2.1	1	2	FM	Can and Nbenth	Prec	Prec	TRUE	FALSE			Uncharacterized basic helix-loop-helix protein At1g06150 (AHRD V1 *-*- Y1615_ARATH)
Solyc05g015750.2.1	1	2	FM	Can and Nbenth	Prec	Prec	TRUE	FALSE	MIKC	GO:0003700	Transcription factor MADS-box 2 (AHRD V1 **** D5HSY6_9ROSA); contains Interpro domain(s) IPR002100 Transcription factor, MADS-box IPR002487 Transcription factor, K-box
Solyc03g111690.2.1	1	2	FM	Can and Nbenth	Prec	Prec	TRUE	TRUE			Pectate lyase (AHRD V1 **** Q2Z1Y4_PRUMU); contains Interpro domain(s) IPR002022 Pectate lyase/Amb allergen
Solyc06g073190.2.1	1	2	FM	Can and Nbenth	Prec	Prec	TRUE	TRUE			Fructokinase-like (AHRD V1 **-* Q307Z3_SOLTU); contains Interpro domain(s) IPR002173 Carbohydrate/puine kinase, PfkB, conserved site
Solyc02g090220.2.1	1	2	FM	Can and Nbenth	Prec	Prec	TRUE	FALSE	Dof	GO:0003700	Dof zinc finger protein (AHRD V1 *-*- Q9SXG5_ORYSA); contains Interpro domain(s) IPR003851 Zinc finger, Dof-type
Solyc05g049980.2.1	1	2	FM	Can and Nbenth	Prec	Prec	TRUE	FALSE			Glycoside hydrolase family 28 protein/polygalacturonase family protein (AHRD V1 **-- Q1PF10_ARATH); contains Interpro domain(s) IPR012334 Pectin lyase fold
Solyc12g009300.1.1	1	2	FM	Can and Nbenth	Prec	Prec	TRUE	FALSE			Sucrose synthase (AHRD V1 **** O82693_SOLLC); contains Interpro domain(s) IPR012820 Sucrose synthase, plants and cyanobacteria IPR000368 Sucrose synthase
Solyc09g008830.2.1	1	2	FM	Can and Nbenth	Prec	Prec	TRUE	FALSE			Os01g0318400 protein (Fragment) (AHRD V1 *-*- Q7XXQ7_ORYSJ)
Solyc02g068070.2.1	1	2	FM	Can and Nbenth	Prec	Prec	TRUE	TRUE			Lipase (AHRD V1 **** Q1XBG1_RICCO); contains Interpro domain(s) IPR006693 AB-hydrolase associated lipase region
Solyc11g012450.1.1	1	2	FM	Can and Nbenth	Prec	Prec	TRUE	FALSE			Predicted transporter (AHRD V1 ***- Q2TZC8_ASPOR); contains Interpro domain(s) IPR003663 Sugar/inositol transporter
Solyc03g064030.2.1	1	2	FM	Can and Nbenth	Prec	Prec	TRUE	FALSE			C4orf29 homolog (AHRD V1 **-- B5X1A7_SALSA); contains Interpro domain(s) IPR019149 Protein of unknown function DUF2048
Solyc05g055880.2.1	1	2	FM	Can and Nbenth	Prec	Prec	TRUE	TRUE			Nucleolar protein 5 (AHRD V1 ***- Q6P364_XENTR); contains Interpro domain(s) IPR002687 Pre-mRNA processing ribonucleoprotein, binding region
Solyc09g007260.2.1	1	2	FM	Can and Nbenth	Prec	Prec	TRUE	TRUE	AP2	GO:0003677	AP2-like ethylene-responsive transcription factor At1g79700 (AHRD V1 *--- AP2L3_ARATH); contains Interpro domain(s) IPR001471 Pathogenesis-related transcriptional factor and ERF, DNA-binding
Solyc02g089200.2.1	1	2	FM	Can and Nbenth	Prec	Prec	TRUE	TRUE	MIKC	GO:0003700	MADS-box transcription factor (AHRD V1 **** Q3KSZ0_PRUDU); contains Interpro domain(s) IPR002100 Transcription factor, MADS-box IPR002487 Transcription factor, K-box
Solyc03g111310.2.1	1	2	FM	Can and Nbenth	Prec	Prec	TRUE	FALSE			AKIN gamma (AHRD V1 **-- Q7XYY0_MEDTR); contains Interpro domain(s) IPR000644 Cystathionine beta-synthase, core
Solyc04g083160.1.1	1	2	FM	Can and Nbenth	Prec	Prec	TRUE	FALSE			cytochrome P450
Solyc01g100370.2.1	1	2	FM	Can and Nbenth	Prec	Prec	TRUE	TRUE			Universal stress protein (AHRD V1 ***- B6SNQ1_MAIZE); contains Interpro domain(s) IPR006016 UspA
Solyc06g076270.2.1	1	2	FM	Can and Nbenth	Prec	Prec	TRUE	FALSE	MYB_related	GO:0003677	Telomere repeat-binding protein 5 (AHRD V1 *-*- TRP5_ARATH); contains Interpro domain(s) IPR001005 SANT, DNA-binding
Solyc04g082030.1.1	1	2	FM	Can and Nbenth	Prec	Prec	TRUE	FALSE			Ornithine decarboxylase (AHRD V1 **** Q9SXF3_TOBAC); contains Interpro domain(s) IPR002433 Ornithine decarboxylase
Solyc10g047030.1.1	1	2	FM	Can and Nbenth	Prec	Prec	TRUE	TRUE			Beta-xylosidase 4 (AHRD V1 **** D7MRV5_ARALY); contains Interpro domain(s) IPR001764 Glycoside hydrolase, family 3, N-terminal
Solyc09g075210.2.1	1	2	FM	Can and Nbenth	Prec	Prec	TRUE	FALSE			Late embryogenesis abundant protein 5 (AHRD V1 ***- Q1HGG0_9ROSI); contains Interpro domain(s) IPR004926 Late embryogenesis abundant protein 3
Solyc07g053220.1.1	1	2	FM	Can and Nbenth	Prec	Prec	TRUE	FALSE			Receptor-like protein kinase (AHRD V1 ***- Q9LLN5_ORYSA); contains Interpro domain(s) IPR002290 Serine/threonine protein kinase
Solyc07g006380.2.1	1	2	FM	Can and Nbenth	Prec	Prec	TRUE	FALSE			Defensin-like protein (AHRD V1 ***- Q948T3_PYRPY); contains Interpro domain(s) IPR008177 Gamma Purothionin
Solyc11g073110.1.1	1	2	FM	Can and Nbenth	Prec	Prec	TRUE	FALSE			Auxin-regulated protein (AHRD V1 ***- Q945F5_SOLLC); contains Interpro domain(s) IPR010369 Protein of unknown function DUF966
Solyc10g080880.1.1	1	2	FM	Can and Nbenth	Prec	Prec	TRUE	TRUE			Auxin efflux carrier (AHRD V1 ***- D6RT09_SOLLC); contains Interpro domain(s) IPR014024 Auxin efflux carrier, subgroup
Solyc03g114840.2.1	1	2	FM	Can and Nbenth	Prec	Prec	TRUE	TRUE	MIKC	GO:0003700	MADS box transcription factor 11 (AHRD V1 **** D9IFM5_ONCHC); contains Interpro domain(s) IPR002100 Transcription factor, MADS-box IPR002487 Transcription factor, K-box
Solyc12g006530.1.1	1	2	FM	Can and Nbenth	Prec	Prec	TRUE	FALSE			Cycloartenol synthase (AHRD V1 ***- D7LA92_ARALY); contains Interpro domain(s) IPR018333 Squalene cyclase
Solyc03g115870.2.1	1	2	FM	Can and Nbenth	Prec	Prec	TRUE	TRUE			Thioredoxin 2 (AHRD V1 ***- Q5ZF47_PLAMJ); contains Interpro domain(s) IPR015467 Thioredoxin, core
Solyc08g081480.2.1	1	2	FM	Can and Nbenth	Prec	Prec	TRUE	TRUE			Polygalacturonase-like protein (AHRD V1 **-- Q84LI7_FRAAN); contains Interpro domain(s) IPR012334 Pectin lyase fold
Solyc02g080230.2.1	1	2	FM	Can and Nbenth	Prec	Prec	TRUE	FALSE			Rop-interactive crib motif-containing protein 1 (AHRD V1 *--- D7LGA6_ARALY); contains Interpro domain(s) IPR000095 PAK-box/P21-Rho-binding
Solyc02g094400.2.1	1	2	FM	Can and Nbenth	Prec	Prec	TRUE	TRUE			Glycerophosphodiester phosphodiesterase gde1 (AHRD V1 ***- B6JW52_SCHJY); contains Interpro domain(s) IPR004129 Glycerophosphoryl diester phosphodiesterase
Solyc01g104950.2.1	1	2	FM	Can and Nbenth	Prec	Prec	TRUE	TRUE			Alpha-L-arabinofuranosidase/beta-D-xylosidase (AHRD V1 **** D9D7L0_MALDO); contains Interpro domain(s) IPR001764 Glycoside hydrolase, family 3, N-terminal
Solyc04g077830.2.1	1	2	FM	Can and Nbenth	Prec	Prec	TRUE	TRUE			Calmodulin-binding protein (AHRD V1 **-* Q7XJB9_ORYSI); contains Interpro domain(s) IPR011990 Tetratricopeptide-like helical
Solyc02g065160.1.1	1	2	FM	Nbenth	Not prec	Not prec	FALSE	FALSE			SWIB/MDM2 domain containing protein (AHRD V1 *-*- B6SRJ0_MAIZE); contains Interpro domain(s) IPR019835 SWIB domain
Solyc03g121790.2.1	1	2	FM	Nbenth	Not prec	Not prec	FALSE	TRUE			EPIDERMAL PATTERNING FACTOR-like protein 3 (AHRD V1 ***- EPFL3_ARATH)
Solyc10g017490.1.1	1	2	FM	Nbenth	Not prec	Not prec	FALSE	TRUE			Kinase family protein (AHRD V1 **** D7KBF8_ARALY); contains Interpro domain(s) IPR002290 Serine/threonine protein kinase
Solyc10g012210.1.1	1	2	FM	Nbenth	Not prec	Not prec	FALSE	TRUE			ARID/BRIGHT DNA-binding domain-containing protein/ELM2 domain-containing protein/Myb-like DNA-binding domain-containing protein (AHRD V1 *--- Q1PEA0_ARATH); contains Interpro domain(s) IPR000949 ELM2
Solyc03g095780.1.1	1	2	FM	Nbenth	Not prec	Not prec	FALSE	TRUE			Abscisic acid receptor PYL6 (AHRD V1 **-* PYL6_ARATH); contains Interpro domain(s) IPR019587 Polyketide cyclase/dehydrase
Solyc01g006540.2.1	1	2	FM	Nbenth	Not prec	Not prec	FALSE	TRUE			Lipoxygenase (AHRD V1 **** Q96573_SOLLC); contains Interpro domain(s) IPR001246 Lipoxygenase, plant
Solyc03g114910.2.1	1	2	FM	Nbenth	Not prec	Not prec	FALSE	TRUE			Ch-cobra (AHRD V1 ***- B7S746_CUNLA); contains Interpro domain(s) IPR017391 COBRA-like
Solyc10g038080.1.1	1	2	FM	Nbenth	Not prec	Not prec	FALSE	TRUE			Shikimate dehydrogenase (AHRD V1 ***- B6TSW1_MAIZE); contains Interpro domain(s) IPR001381 Dehydroquinase class I
Solyc02g038740.2.1	1	2	FM	Nbenth	Not prec	Not prec	FALSE	TRUE			3-hydroxy-3-methylglutaryl coenzyme A reductase (AHRD V1 **** Q9FS01_SOLTU); contains Interpro domain(s) IPR004554 Hydroxymethylglutaryl-CoA reductase, class I, catalytic
Solyc11g073130.1.1	1	2	FM	Nbenth	Not prec	Not prec	FALSE	FALSE			Protein tyrosine phosphatase 1B (AHRD V1 *-*- D9IVF2_STRIE); contains Interpro domain(s) IPR007482 Protein-tyrosine phosphatase-like, PTPLA
Solyc06g075360.2.1	1	2	FM	Nbenth	Not prec	Not prec	FALSE	FALSE			Senescence-associated protein (AHRD V1 ***- B6T9C5_MAIZE); contains Interpro domain(s) IPR000301 Tetraspanin, subgroup
Solyc04g076820.1.1	1	2	FM	Nbenth	Not prec	Not prec	FALSE	FALSE			Octicosapeptide/Phox/Bem1p domain-containing protein (AHRD V1 *--- D7MPG4_ARALY); contains Interpro domain(s) IPR000270 Octicosapeptide/Phox/Bem1p
Solyc02g080510.1.1	1	2	FM	Nbenth	Not prec	Not prec	FALSE	FALSE			Arabidopsis thaliana genomic DNA chromosome 5 P1 clone MOK16 (AHRD V1 *-*- Q9LYW2_ARATH); contains Interpro domain(s) IPR007608 Protein of unknown function DUF584
Solyc09g005110.2.1	1	2	FM	Nbenth	Not prec	Not prec	FALSE	TRUE			Pyruvate decarboxylase 1 (AHRD V1 **** Q84V95_LOTCO); contains Interpro domain(s) IPR012110 Pyruvate decarboxylase/indolepyruvate decarboxylase
Solyc12g100180.1.1	1	2	FM	Nbenth	Not prec	Not prec	FALSE	FALSE			ATP-binding cassette transporter (AHRD V1 ***- D8RL93_SELML); contains Interpro domain(s) IPR013525 ABC-2 type transporter
Solyc10g052470.1.1	1	2	FM	Nbenth	Not prec	Not prec	FALSE	TRUE	MYB_related	GO:0003700	Myb family transcription factor (Fragment) (AHRD V1 **** D7KSM0_ARALY); contains Interpro domain(s) IPR017884 SANT, eukarya
Solyc02g093890.1.1	1	2	FM	Nbenth	Not prec	Not prec	FALSE	FALSE			Unknown Protein (AHRD V1)
Solyc03g113060.2.1	1	2	FM	Nbenth	Not prec	Not prec	FALSE	TRUE			ATP-binding cassette transporter (AHRD V1 ***- D8RFW2_SELML); contains Interpro domain(s) IPR003439 ABC transporter-like
Solyc08g036570.1.1	1	2	FM	Nbenth	Not prec	Not prec	FALSE	TRUE			Glutaredoxin (AHRD V1 **** B9GF65_POPTR); contains Interpro domain(s) IPR011905 Glutaredoxin-like, plant II
Solyc09g075870.1.1	1	2	FM	Nbenth	Not prec	Not prec	FALSE	FALSE			Lipoxygenase (AHRD V1 **** B9RSQ2_RICCO); contains Interpro domain(s) IPR001246 Lipoxygenase, plant
Solyc10g008400.1.1	1	2	FM	Nbenth	Not prec	Not prec	FALSE	FALSE			RING finger protein 5 (AHRD V1 *--- B6TI40_MAIZE); contains Interpro domain(s) IPR018957 Zinc finger, C3HC4 RING-type
Solyc03g060510.2.1	1	2	FM	Nbenth	Not prec	Not prec	FALSE	FALSE			Membrane protein (AHRD V1 **-- D0BK36_9LACT); contains Interpro domain(s) IPR008537 Protein of unknown function DUF819
Solyc01g010250.2.1	1	2	FM	Nbenth	Not prec	Not prec	FALSE	FALSE			6-phosphogluconolactonase (AHRD V1 ***- B6U0H2_MAIZE); contains Interpro domain(s) IPR005900 6-phosphogluconolactonase
Solyc12g009880.1.1	1	2	FM	Nbenth	Not prec	Not prec	FALSE	FALSE			Serine-rich protein (AHRD V1 ***- Q8L8M8_ARATH)
Solyc12g094440.1.1	1	2	FM	Nbenth	Not prec	Not prec	FALSE	TRUE			High mobility group family (Fragment) (AHRD V1 **-- B9GFX2_POPTR); contains Interpro domain(s) IPR001606 AT-rich interaction region
Solyc07g032740.2.1	1	2	FM	Nbenth	Not prec	Not prec	FALSE	TRUE			Aspartate aminotransferase (AHRD V1 **** A9PHH1_POPTR); contains Interpro domain(s) IPR000796 Aspartate/other aminotransferase
Solyc02g089290.2.1	1	2	FM	Nbenth	Not prec	Not prec	FALSE	TRUE			ATP binding / kinase/ protein serine / threonine kinase (AHRD V1 **** C5DB47_VITVI); contains Interpro domain(s) IPR002290 Serine/threonine protein kinase
Solyc04g025510.2.1	1	2	FM	Nbenth	Not prec	Not prec	FALSE	FALSE			Os02g0194300 protein (Fragment) (AHRD V1 *-*- Q0E347_ORYSJ); contains Interpro domain(s) IPR014854 Nse4
Solyc10g049660.1.1	1	2	FM	Nbenth	Not prec	Not prec	FALSE	FALSE			Transposon protein Mutator sub-class (AHRD V1 **-- B6U1M7_MAIZE); contains Interpro domain(s) IPR004249 NPH3
Solyc04g014260.1.1	1	2	FM	Nbenth	Not prec	Not prec	FALSE	FALSE	ZF-HD	GO:0003700	Zinc finger-homeodomain protein 1 (Fragment) (AHRD V1 **-- B0LK17_YUCFI); contains Interpro domain(s) IPR006456 ZF-HD homeobox protein Cys/His-rich dimerisation region
Solyc07g017610.2.1	1	2	FM	Nbenth	Not prec	Not prec	FALSE	FALSE			Saccharopine dehydrogenase (NAD(+) L-glutamate-forming) (AHRD V1 *-** C7PUW7_CHIPD); contains Interpro domain(s) IPR005097 Saccharopine dehydrogenase
Solyc02g084680.2.1	1	2	FM	Nbenth	Not prec	Not prec	FALSE	TRUE	SRS	GO:0003700	Short internodes 2 (AHRD V1 **-- B9MXK1_POPTR); contains Interpro domain(s) IPR007818 Protein of unknown function DUF702
Solyc01g104880.2.1	1	2	FM	Nbenth	Not prec	Not prec	FALSE	TRUE			Phosphatidylserine decarboxylase proenzyme 2 (AHRD V1 **** D3AWK7_POLPA); contains Interpro domain(s) IPR005221 Phosphatidylserine decarboxylase
Solyc04g082420.2.1	1	2	FM	Nbenth	Not prec	Not prec	FALSE	FALSE			BTB/POZ domain-containing protein (AHRD V1 **-- D7LC69_ARALY); contains Interpro domain(s) IPR013089 Kelch related
Solyc03g095310.2.1	1	2	FM	Nbenth	Not prec	Not prec	FALSE	TRUE			Cytochrome P450
Solyc04g007150.2.1	1	2	FM	Nbenth	Not prec	Not prec	FALSE	TRUE			Alpha-glucosidase (AHRD V1 **** Q9LEC9_SOLTU); contains Interpro domain(s) IPR000322 Glycoside hydrolase, family 31
Solyc07g065970.1.1	1	2	FM	Nbenth	Not prec	Not prec	FALSE	TRUE			Chaperone protein dnaJ 11 (AHRD V1 *-*- B6SS19_MAIZE); contains Interpro domain(s) IPR001623 Heat shock protein DnaJ, N-terminal
Solyc04g050990.2.1	1	2	FM	Nbenth	Not prec	Not prec	FALSE	FALSE			F-box protein PP2-B1 (AHRD V1 ***- PP2B1_ARATH); contains Interpro domain(s) IPR001810 Cyclin-like F-box
Solyc05g007240.1.1	1	2	FM	Nbenth	Not prec	Not prec	FALSE	FALSE			TO109-12 (Fragment) (AHRD V1 *-*- Q3LVG1_TAROF)
Solyc12g013690.1.1	1	2	FM	Nbenth	Not prec	Not prec	FALSE	FALSE			Monooxygenase FAD-binding protein (AHRD V1 **-- Q1B616_MYCSS); contains Interpro domain(s) IPR003042 Aromatic-ring hydroxylase-like
Solyc06g059740.2.1	1	2	FM	Nbenth	Not prec	Not prec	FALSE	TRUE			Alcohol dehydrogenase 2 (AHRD V1 **** Q84UY3_PETHY); contains Interpro domain(s) IPR002085 Alcohol dehydrogenase superfamily, zinc-containing
Solyc02g065340.1.1	1	2	FM	Nbenth	Not prec	Not prec	FALSE	FALSE	B3	GO:0006355	B3 domain-containing protein REM14 (AHRD V1 ***- REM14_ARATH); contains Interpro domain(s) IPR003340 Transcriptional factor B3
Solyc01g108320.2.1	1	2	FM	Nbenth	Not prec	Not prec	FALSE	TRUE			Peroxidase (AHRD V1 ***- Q43004_ORYSJ); contains Interpro domain(s) IPR002016 Haem peroxidase, plant/fungal/bacterial
Solyc03g113710.2.1	1	2	FM	Nbenth	Not prec	Not prec	FALSE	TRUE			Formin 3 (AHRD V1 *-*- D0QAN4_ARATH); contains Interpro domain(s) IPR015425 Actin-binding FH2
Solyc12g006450.1.1	1	2	FM	Nbenth	Not prec	Not prec	FALSE	TRUE			Aminotransferase-like protein (AHRD V1 ***- Q9LIE2_ARATH); contains Interpro domain(s) IPR005814 Aminotransferase class-III
Solyc08g081740.2.1	1	2	FM	Nbenth	Not prec	Not prec	FALSE	FALSE			Katanin p60 ATPase-containing subunit (AHRD V1 *--* KTNA1_ARATH); contains Interpro domain(s) IPR003959 ATPase, AAA-type, core
Solyc01g093960.2.1	1	2	FM	Nbenth	Prec	Not prec	FALSE	TRUE	MIKC		MADS box transcription factor (AHRD V1 ***- Q2NNC0_ELAGV); contains Interpro domain(s) IPR002487 Transcription factor, K-box
Solyc02g077880.2.1	1	2	FM	Nbenth	Prec	Not prec	FALSE	FALSE			Auxin-repressed protein (AHRD V1 ***- Q6PXE1_9SOLN); contains Interpro domain(s) IPR008406 Dormancyauxin associated
Solyc04g082410.2.1	1	2	FM	Nbenth	Prec	Not prec	FALSE	TRUE			BTB/POZ domain-containing protein (AHRD V1 **-- D7LC69_ARALY); contains Interpro domain(s) IPR013089 Kelch related
Solyc03g098710.1.1	1	2	FM	Nbenth	Prec	Not prec	FALSE	FALSE			Kunitz-type proteinase inhibitor A4 (Fragment) (AHRD V1 **** C5IWR3_SOLBR); contains Interpro domain(s) IPR011065 Kunitz inhibitor ST1-like
Solyc10g051390.1.1	1	2	FM	Nbenth	Prec	Not prec	FALSE	FALSE			RNA-binding glycine-rich protein-1b (AHRD V1 **** Q40427_NICSY); contains Interpro domain(s) IPR015465 RNA recognition motif, glycine rich protein
Solyc07g014730.2.1	1	2	FM	Nbenth	Prec	Not prec	FALSE	TRUE			Phospholipase A2 (AHRD V1 **** Q5CCT8_TOBAC); contains Interpro domain(s) IPR016090 Phospholipase A2
Solyc02g093910.2.1	1	2	FM	Nbenth	Prec	Not prec	FALSE	TRUE			Kelch repeat-containing protein-like (AHRD V1 ***- Q6ZK44_ORYSJ); contains Interpro domain(s) IPR015915 Kelch-type beta propeller
Solyc03g120100.2.1	1	2	FM	Nbenth	Prec	Not prec	FALSE	FALSE			Mitochondrial carrier protein (AHRD V1 ***- D2VIZ2_NAEGR); contains Interpro domain(s) IPR002113 Adenine nucleotide translocator 1
Solyc07g038160.2.1	1	2	FM	Nbenth	Prec	Not prec	FALSE	TRUE	GATA	GO:0006355	GATA transcription factor 20 (AHRD V1 *-*- B6SS40_MAIZE); contains Interpro domain(s) IPR000679 Zinc finger, GATA-type
Solyc04g064620.2.1	1	2	FM	Nbenth	Prec	Not prec	FALSE	TRUE			RAG1-activating protein 1 homolog (AHRD V1 **-- R1AP1_DROPS); contains Interpro domain(s) IPR018179 RAG1-activating protein 1 homologue
Solyc03g121100.2.1	1	2	FM	Nbenth	Prec	Not prec	FALSE	TRUE			Acid phosphatase (AHRD V1 **-- O49855_SOYBN); contains Interpro domain(s) IPR010028 Acid phosphatase, plant
Solyc04g074770.2.1	1	2	FM	Nbenth	Prec	Not prec	FALSE	FALSE			Unknown Protein (AHRD V1)
Solyc11g071290.1.1	1	2	FM	Nbenth	Prec	Not prec	FALSE	TRUE			Alcohol dehydrogenase (AHRD V1 **** Q43169_SOLTU); contains Interpro domain(s) IPR002085 Alcohol dehydrogenase superfamily, zinc-containing
Solyc06g060110.2.1	1	2	FM	Nbenth	Prec	Not prec	FALSE	TRUE			Amino acid permease (AHRD V1 **** B9GU10_POPTR); contains Interpro domain(s) IPR013057 Amino acid transporter, transmembrane
Solyc02g082420.2.1	1	2	FM	Nbenth	Prec	Not prec	FALSE	FALSE			Ring finger protein (AHRD V1 *-*- O49869_HORVU); contains Interpro domain(s) IPR018957 Zinc finger, C3HC4 RING-type
Solyc12g038510.1.1	1	2	FM	Nbenth	Prec	Not prec	FALSE	TRUE	MIKC		MADS box transcription factor 11 (AHRD V1 ***- D9IFM5_ONCHC); contains Interpro domain(s) IPR002487 Transcription factor, K-box
Solyc03g098780.1.1	1	2	FM	Nbenth	Prec	Not prec	FALSE	FALSE			Kunitz-type protease inhibitor (AHRD V1 **** Q3S488_SOLTU); contains Interpro domain(s) IPR002160 Proteinase inhibitor I3, Kunitz legume
Solyc01g066720.2.1	1	2	FM	Nbenth	Prec	Not prec	FALSE	TRUE			Hypoxia induced protein conserved region containing protein (AHRD V1 ***- B6UCX6_MAIZE); contains Interpro domain(s) IPR007667 Hypoxia induced protein conserved region
Solyc05g041200.2.1	1	2	FM	Nbenth	Prec	Not prec	FALSE	FALSE			4-hydroxyphenylpyruvate dioxygenase (AHRD V1 **** B7X935_HEVBR); contains Interpro domain(s) IPR005956 4-hydroxyphenylpyruvate dioxygenase
Solyc10g009110.1.1	1	2	FM	Nbenth	Prec	Not prec	FALSE	FALSE	ERF	GO:0003677_GO:0006355	Ethylene-responsive transcription factor 4 (AHRD V1 ***- B6SIZ8_MAIZE); contains Interpro domain(s) IPR001471 Pathogenesis-related transcriptional factor and ERF, DNA-binding
Solyc11g071460.1.1	1	2	FM	Nbenth	Prec	Not prec	FALSE	TRUE			Dehydrogenase/reductase SDR family member 13 (AHRD V1 **-- DHR13_BOVIN); contains Interpro domain(s) IPR002347 Glucose/ribitol dehydrogenase
Solyc02g031710.2.1	1	2	FM	Nbenth	Prec	Not prec	FALSE	TRUE			Protein binding protein (AHRD V1 **-- D7L0L7_ARALY); contains Interpro domain(s) IPR001841 Zinc finger, RING-type
Solyc12g014500.1.1	1	2	FM	Nbenth	Prec	Not prec	FALSE	FALSE			S-adenosyl-L-methionine salicylic acid carboxyl methyltransferase-like protein (AHRD V1 **** Q9FLN8_ARATH); contains Interpro domain(s) IPR005299 SAM dependent carboxyl methyltransferase
Solyc08g078940.1.1	1	2	FM	Nbenth	Prec	Not prec	FALSE	TRUE			Cortical cell-delineating protein (AHRD V1 **-- B6U436_MAIZE); contains Interpro domain(s) IPR013770 Plant lipid transfer protein and hydrophobic protein, helical
Solyc03g034400.2.1	1	2	FM	Nbenth	Prec	Not prec	FALSE	FALSE			Multidrug resistance protein mdtK (AHRD V1 ***- MDTK_EDWI9); contains Interpro domain(s) IPR015521 MATE family transporter related protein
Solyc06g071380.2.1	1	2	FM	Nbenth	Prec	Not prec	FALSE	FALSE			Unknown Protein (AHRD V1)
Solyc01g006390.2.1	1	2	FM	Nbenth	Prec	Not prec	FALSE	FALSE			Cysteine-rich extensin-like protein-4 (AHRD V1 *-*- Q08197_TOBAC)
Solyc06g061250.1.1	1	2	TM	Can	Not prec	Not prec	FALSE	FALSE			Ring H2 finger protein (AHRD V1 *-*- D9ZHD8_HYPPE); contains Interpro domain(s) IPR018957 Zinc finger, C3HC4 RING-type
Solyc04g082050.2.1	1	2	TM	Can	Not prec	Not prec	FALSE	TRUE			Cellular retinaldehyde-binding/triple function C-terminal (AHRD V1 **-- B6SN40_MAIZE); contains Interpro domain(s) IPR001251 Cellular retinaldehyde-binding/triple function, C-terminal
Solyc03g097920.1.1	1	2	TM	Can	Not prec	Not prec	FALSE	FALSE			Mitogen-activated protein kinase kinase (AHRD V1 **** D7NPU9_CAPAN); contains Interpro domain(s) IPR002290 Serine/threonine protein kinase
Solyc08g005880.2.1	1	2	TM	Can	Not prec	Not prec	FALSE	FALSE			Multidrug resistance protein mdtK (AHRD V1 **-- MDTK_PROMH); contains Interpro domain(s) IPR002528 Multi antimicrobial extrusion protein MatE
Solyc06g071650.1.1	1	2	TM	Can	Not prec	Not prec	FALSE	TRUE			AP-1 complex subunit mu (AHRD V1 ***- Q7RVT3_NEUCR); contains Interpro domain(s) IPR001392 Clathrin adaptor, mu subunit
Solyc03g081240.2.1	1	2	TM	Can	Not prec	Not prec	FALSE	TRUE		GO:0006355	Pseudo response regulator (AHRD V1 ***- B9IDF0_POPTR); contains Interpro domain(s) IPR001789 Signal transduction response regulator, receiver region
Solyc04g007790.2.1	1	2	TM	Can	Not prec	Not prec	FALSE	FALSE			Major latex-like protein (AHRD V1 **-- B5THI3_PANGI); contains Interpro domain(s) IPR000916 Bet v I allergen
Solyc09g097930.2.1	1	2	TM	Can	Not prec	Not prec	FALSE	TRUE			MazG nucleotide pyrophosphohydrolase (AHRD V1 ***- B1J275_PSEPW); contains Interpro domain(s) IPR004518 NTP pyrophosphohydrolase MazG, putative catalytic core
Solyc08g007690.1.1	1	2	TM	Can	Not prec	Not prec	FALSE	FALSE			Subtilisin-like protease (AHRD V1 **-- Q9LWA3_SOLLC); contains Interpro domain(s) IPR015500 Peptidase S8, subtilisin-related
Solyc12g009220.1.1	1	2	TM	Can	Not prec	Not prec	FALSE	FALSE			Jasmonate ZIM-domain protein 1 (AHRD V1 **-- A7XXZ0_SOLLC); contains Interpro domain(s) IPR010399 Tify
Solyc06g069670.2.1	1	2	TM	Can	Not prec	Not prec	FALSE	FALSE			Formin 2A (AHRD V1 *-*- C7BGM8_PHYPA); contains Interpro domain(s) IPR015425 Actin-binding FH2
Solyc01g095630.2.1	1	2	TM	Can	Not prec	Not prec	FALSE	TRUE	WRKY		WRKY transcription factor (AHRD V1 ***- D3YEX5_SOLLC); contains Interpro domain(s) IPR003657 DNA-binding WRKY
Solyc05g006430.1.1	1	2	TM	Can	Not prec	Not prec	FALSE	TRUE			Formin 3 (AHRD V1 *-*- D0QAN4_ARATH); contains Interpro domain(s) IPR015425 Actin-binding FH2
Solyc07g063820.2.1	1	2	TM	Can	Not prec	Not prec	FALSE	FALSE			Serine/threonine-protein kinase receptor (AHRD V1 **** B6U2B7_MAIZE); contains Interpro domain(s) IPR002290 Serine/threonine protein kinase
Solyc10g011960.1.1	1	2	TM	Can	Not prec	Not prec	FALSE	FALSE			Unknown Protein (AHRD V1)
Solyc01g006660.1.1	1	2	TM	Can	Not prec	Not prec	FALSE	TRUE			Subtilisin-like serine protease (AHRD V1 **-* Q8LAE1_ARATH); contains Interpro domain(s) IPR015500 Peptidase S8, subtilisin-related
Solyc07g014670.2.1	1	2	TM	Can	Not prec	Not prec	FALSE	FALSE			Cytochrome P450
Solyc12g005040.1.1	1	2	TM	Can	Not prec	Not prec	FALSE	TRUE			Calcium-dependent protein kinase (AHRD V1 ***- Q9XER6_SOLTU); contains Interpro domain(s) IPR011992 EF-Hand type
Solyc12g049350.1.1	1	2	TM	Can	Not prec	Not prec	FALSE	TRUE	MYB	GO:0003677	Myb 12 transcription factor (AHRD V1 ***- D2EBC3_9SOLN); contains Interpro domain(s) IPR015495 Myb transcription factor
Solyc05g006010.2.1	1	2	TM	Can	Not prec	Not prec	FALSE	TRUE			Peptide transporter (AHRD V1 **-* A6YJX4_9MAGN); contains Interpro domain(s) IPR000109 TGF-beta receptor, type I/II extracellular region
Solyc03g112430.1.1	1	2	TM	Can	Not prec	Not prec	FALSE	TRUE	LBD		LOB domain protein 1 (AHRD V1 ***- B2KKZ3_ORYSJ); contains Interpro domain(s) IPR004883 Lateral organ boundaries, LOB
Solyc02g071060.2.1	1	2	TM	Can	Not prec	Not prec	FALSE	TRUE			Purine permease family protein (AHRD V1 **-* D7MCV2_ARALY); contains Interpro domain(s) IPR004853 Protein of unknown function DUF250
Solyc03g083060.2.1	1	2	TM	Can	Not prec	Not prec	FALSE	TRUE			Unknown Protein (AHRD V1)
Solyc10g005060.2.1	1	2	TM	Can	Not prec	Not prec	FALSE	TRUE			O-methyltransferase-like protein (AHRD V1 **** D3JZ18_PRUMU); contains Interpro domain(s) IPR016461 O-methyltransferase, COMT, eukaryota
Solyc01g098400.2.1	1	2	TM	Can	Not prec	Not prec	FALSE	TRUE			Histidine phosphotransfer protein (AHRD V1 **** B9I823_POPTR); contains Interpro domain(s) IPR008207 Signal transduction histidine kinase, phosphotransfer (Hpt) region
Solyc10g079600.1.1	1	2	TM	Can	Not prec	Prec	FALSE	TRUE		GO:0006355	Response regulator 6 (AHRD V1 ***- Q9FRY9_MAIZE); contains Interpro domain(s) IPR001789 Signal transduction response regulator, receiver region
Solyc12g088940.1.1	1	2	TM	Can	Not prec	Prec	FALSE	TRUE			Protein serine/threonine kinase (AHRD V1 *-*- D3BP85_POLPA); contains Interpro domain(s) IPR002290 Serine/threonine protein kinase
Solyc07g022830.2.1	1	2	TM	Can	Not prec	Prec	FALSE	FALSE			Xenotropic and polytropic retrovirus receptor (AHRD V1 **-- B2GU54_XENTR); contains Interpro domain(s) IPR004342 EXS, C-terminal
Solyc05g009770.1.1	1	2	TM	Can	Not prec	Prec	FALSE	TRUE	C2H2	GO:0003700	Zinc finger family protein (AHRD V1 ***- D7KQE1_ARALY); contains Interpro domain(s) IPR007087 Zinc finger, C2H2-type
Solyc04g080740.1.1	1	2	TM	Can	Not prec	Prec	FALSE	TRUE	bZIP		BZIP transcription factor family protein (AHRD V1 **-- D7KSN7_ARALY); contains Interpro domain(s) IPR011700 Basic leucine zipper
Solyc08g078590.1.1	1	2	TM	Can	Not prec	Prec	FALSE	TRUE	C2H2		Zinc finger protein-like (AHRD V1 *-*- Q9M202_ARATH); contains Interpro domain(s) IPR007087 Zinc finger, C2H2-type
Solyc08g075430.2.1	1	2	TM	Can	Not prec	Prec	FALSE	FALSE			ABC transporter G family member 14 (AHRD V1 ***- AB14G_ARATH); contains Interpro domain(s) IPR013525 ABC-2 type transporter
Solyc07g043120.1.1	1	2	TM	Can	Not prec	Prec	FALSE	TRUE			UDP-glucosyltransferase (AHRD V1 **** A7M6U9_IPONI); contains Interpro domain(s) IPR002213 UDP-glucuronosyl/UDP-glucosyltransferase
Solyc09g005880.1.1	1	2	TM	Can	Not prec	Prec	FALSE	TRUE			Unknown Protein (AHRD V1)
Solyc02g092200.2.1	1	2	TM	Can	Not prec	Prec	FALSE	TRUE			Genomic DNA chromosome 5 TAC clone K9I9 (AHRD V1 *-*- Q9FJV9_ARATH)
Solyc02g089690.2.1	1	2	TM	Can	Not prec	Prec	FALSE	TRUE			Leaf senescence protein-like (AHRD V1 ***- Q8RV74_ORYSJ); contains Interpro domain(s) IPR004253 Protein of unknown function DUF231, plant
Solyc04g010330.2.1	1	2	TM	Can and Nbenth	Not prec	Not prec	FALSE	TRUE			Auxin-regulated protein (AHRD V1 *-*- Q945F5_SOLLC); contains Interpro domain(s) IPR010369 Protein of unknown function DUF966
Solyc02g089210.2.1	1	2	TM	Can and Nbenth	Not prec	Not prec	FALSE	TRUE	MIKC		MADS box transcription factor (AHRD V1 ***- Q689E7_GENTR); contains Interpro domain(s) IPR002487 Transcription factor, K-box
Solyc12g049540.1.1	1	2	TM	Can and Nbenth	Not prec	Not prec	FALSE	TRUE			Polyphosphoinositide phosphatase (AHRD V1 ***- C0S4L1_PARBP); contains Interpro domain(s) IPR002013 Synaptojanin, N-terminal
Solyc02g089160.2.1	1	2	TM	Can and Nbenth	Not prec	Not prec	FALSE	TRUE			Cytochrome P450
Solyc07g064180.2.1	1	2	TM	Can and Nbenth	Not prec	Not prec	FALSE	FALSE			Pectinesterase (AHRD V1 ***- B9RXQ4_RICCO); contains Interpro domain(s) IPR018040 Pectinesterase, active site IPR000070 Pectinesterase, catalytic
Solyc10g078370.1.1	1	2	TM	Can and Nbenth	Not prec	Not prec	FALSE	TRUE			Auxin efflux carrier (AHRD V1 ***- D6RT09_SOLLC); contains Interpro domain(s) IPR014024 Auxin efflux carrier, subgroup
Solyc03g112580.2.1	1	2	TM	Can and Nbenth	Not prec	Not prec	FALSE	TRUE			Receptor like kinase, RLK
Solyc02g089620.2.1	1	2	TM	Can and Nbenth	Not prec	Not prec	FALSE	TRUE			Proline dehydrogenase (AHRD V1 **** A1E289_ACTDE); contains Interpro domain(s) IPR015659 Proline oxidase
Solyc02g070430.2.1	1	2	TM	Can and Nbenth	Not prec	Not prec	FALSE	TRUE			Gibberellin 2-oxidase 1 (AHRD V1 **** A7LCJ5_SOLTU); contains Interpro domain(s) IPR005123 Oxoglutarate and iron-dependent oxygenase
Solyc01g010150.2.1	1	2	TM	Can and Nbenth	Not prec	Not prec	FALSE	TRUE			Unknown protein DS12 from 2D-PAGE of leaf, chloroplastic (AHRD V1 *--- UP12_ORYSJ); contains Interpro domain(s) IPR002912 Amino acid-binding ACT
Solyc10g075050.1.1	1	2	TM	Can and Nbenth	Not prec	Not prec	FALSE	TRUE			Non-specific lipid-transfer protein (AHRD V1 ***- A7UGG9_SOLTU); contains Interpro domain(s) IPR013770 Plant lipid transfer protein and hydrophobic protein, helical
Solyc01g067540.1.1	1	2	TM	Can and Nbenth	Not prec	Not prec	FALSE	TRUE	ERF	GO:0003677_GO:0006355	Ethylene responsive transcription factor 12 (AHRD V1 *-*- C0J9I3_9ROSA); contains Interpro domain(s) IPR001471 Pathogenesis-related transcriptional factor and ERF, DNA-binding
Solyc07g007750.2.1	1	2	TM	Can and Nbenth	Not prec	Not prec	FALSE	TRUE			Defensin protein (AHRD V1 ***- B1N678_SOLLC); contains Interpro domain(s) IPR008177 Gamma Purothionin
Solyc04g076480.2.1	1	2	TM	Can and Nbenth	Not prec	Not prec	FALSE	TRUE			Serine/threonine-protein kinase B-raf (AHRD V1 *-** BRAF_COTJA); contains Interpro domain(s) IPR002290 Serine/threonine protein kinase
Solyc02g092490.2.1	1	2	TM	Can and Nbenth	Not prec	Not prec	FALSE	TRUE			Acetyltransferase-like protein (AHRD V1 ***- Q7EYF5_ORYSJ); contains Interpro domain(s) IPR000182 GCN5-related N-acetyltransferase
Solyc01g065540.2.1	1	2	TM	Can and Nbenth	Not prec	Not prec	FALSE	TRUE	ARR-B	GO:0003700	Response regulator 8 (AHRD V1 *-*- Q9AV93_MAIZE); contains Interpro domain(s) IPR017053 Response regulator, plant B-type
Solyc02g088820.2.1	1	2	TM	Can and Nbenth	Not prec	Not prec	FALSE	TRUE			Serine carboxypeptidase K10B2.2 (AHRD V1 **** B6TSK4_MAIZE); contains Interpro domain(s) IPR001563 Peptidase S10, serine carboxypeptidase
Solyc01g096410.2.1	1	2	TM	Can and Nbenth	Not prec	Not prec	FALSE	TRUE			Phosphatidylinositol-4-phosphate 5-kinase family protein (AHRD V1 ***- D7L735_ARALY); contains Interpro domain(s) IPR017163 Phosphatidylinositol-4-phosphate 5-kinase, plant
Solyc02g077780.2.1	1	2	TM	Can and Nbenth	Not prec	Not prec	FALSE	TRUE			Necrotic spotted lesions 1 (Fragment) (AHRD V1 *-*- B6ZA38_HELPE); contains Interpro domain(s) IPR001862 Membrane attack complex component/perforin/complement C9
Solyc04g080970.2.1	1	2	TM	Can and Nbenth	Not prec	Not prec	FALSE	TRUE	SRS		Short internode related sequence 5 (AHRD V1 **-- D2KC76_BRARP); contains Interpro domain(s) IPR007818 Protein of unknown function DUF702
Solyc03g113350.2.1	1	2	TM	Can and Nbenth	Not prec	Not prec	FALSE	TRUE			CHY zinc finger containing protein (AHRD V1 *-*- C5P643_COCP7); contains Interpro domain(s) IPR008913 Zinc finger, CHY-type
Solyc02g081230.2.1	1	2	TM	Can and Nbenth	Not prec	Not prec	FALSE	TRUE			Unknown Protein (AHRD V1)
Solyc06g074000.1.1	1	2	TM	Can and Nbenth	Not prec	Prec	FALSE	FALSE			Aspartic proteinase nepenthesin-2 (AHRD V1 **-- B6SJT4_MAIZE); contains Interpro domain(s) IPR001461 Peptidase A1
Solyc04g008450.2.1	1	2	TM	Can and Nbenth	Not prec	Prec	FALSE	FALSE			Potassium transporter 17 (AHRD V1 **** B6T8T1_MAIZE); contains Interpro domain(s) IPR003855 K+ potassium transporter
Solyc03g025800.2.1	1	2	TM	Can and Nbenth	Not prec	Prec	FALSE	TRUE			Os03g0111400 protein (Fragment) (AHRD V1 *-*- Q0DVV0_ORYSJ); contains Interpro domain(s) IPR006121 Heavy metal transport/detoxification protein
Solyc02g063430.2.1	1	2	TM	Can and Nbenth	Not prec	Prec	FALSE	FALSE	bHLH	GO:0003700	BHLH transcription factor (AHRD V1 **** A9YWR2_MEDTR); contains Interpro domain(s) IPR011598 Helix-loop-helix DNA-binding
Solyc03g007240.2.1	1	2	TM	Can and Nbenth	Not prec	Prec	FALSE	FALSE			Spermidine synthase 1 (AHRD V1 **** B6TA19_MAIZE); contains Interpro domain(s) IPR001045 Spermine synthase
Solyc10g080930.1.1	1	2	TM	Can and Nbenth	Not prec	Prec	FALSE	TRUE			Transcription elongation factor A protein 2 (AHRD V1 *--- TCEA2_HUMAN); contains Interpro domain(s) IPR010990 Transcription elongation factor, TFIIS/elongin A/CRSP70, N-terminal
Solyc06g072430.1.1	1	2	TM	Can and Nbenth	Not prec	Prec	FALSE	TRUE			Bcl-2-associated athanogene-like protein (AHRD V1 *-*- D1MIX4_VITVI); contains Interpro domain(s) IPR003103 Apoptosis regulator Bcl-2 protein, BAG
Solyc09g074970.2.1	1	2	TM	Can and Nbenth	Not prec	Prec	FALSE	TRUE			Thiamin pyrophosphokinase 1 (AHRD V1 **** B6SUI9_MAIZE); contains Interpro domain(s) IPR016966 Thiamin pyrophosphokinase, eukaryotic
Solyc02g093040.2.1	1	2	TM	Can and Nbenth	Not prec	Prec	FALSE	TRUE			Cathepsin B-like cysteine proteinase (AHRD V1 **-* CYSP_SCHMA); contains Interpro domain(s) IPR013128 Peptidase C1A, papain
Solyc03g019950.2.1	1	2	TM	Can and Nbenth	Prec	Not prec	FALSE	TRUE			Genomic DNA chromosome 5 P1 clone MAC12 (AHRD V1 **-- Q9FFX3_ARATH); contains Interpro domain(s) IPR004328 BRO1
Solyc02g072310.2.1	1	2	TM	Can and Nbenth	Prec	Not prec	FALSE	TRUE			Receptor like kinase, RLK
Solyc01g098240.1.1	1	2	TM	Can and Nbenth	Prec	Not prec	FALSE	FALSE			RNA polymerase Rpb1 C-terminal repeat domain-containing protein (AHRD V1 *--- C5GU31_AJEDR); contains Interpro domain(s) IPR012474 Frigida-like
Solyc04g080580.2.1	1	2	TM	Can and Nbenth	Prec	Not prec	FALSE	TRUE			Kinase PfkB family (AHRD V1 **** D4WID3_BACOV); contains Interpro domain(s) IPR011611 Carbohydrate/purine kinase
Solyc10g076790.1.1	1	2	TM	Can and Nbenth	Prec	Not prec	FALSE	TRUE			Auxin transporter-like protein 1 (AHRD V1 **** B6U1Y3_MAIZE); contains Interpro domain(s) IPR013057 Amino acid transporter, transmembrane
Solyc03g026040.2.1	1	2	TM	Can and Nbenth	Prec	Not prec	FALSE	TRUE			Receptor like kinase, RLK
Solyc04g078460.2.1	1	2	TM	Can and Nbenth	Prec	Not prec	FALSE	TRUE			N(4)-(Beta-N-acetylglucosaminyl)-L-asparaginase (AHRD V1 **** ASPG_ELIMR); contains Interpro domain(s) IPR000246 Peptidase T2, asparaginase 2
Solyc05g006550.2.1	1	2	TM	Can and Nbenth	Prec	Not prec	FALSE	TRUE			Microtubule-associated protein TORTIFOLIA1 (AHRD V1 *--- B6SS76_MAIZE); contains Interpro domain(s) IPR011989 Armadillo-like helical
Solyc01g010130.2.1	1	2	TM	Can and Nbenth	Prec	Not prec	FALSE	TRUE	bHLH	GO:0003700	Transcription factor (AHRD V1 *-** D6MKM4_9ASPA); contains Interpro domain(s) IPR011598 Helix-loop-helix DNA-binding
Solyc07g056360.1.1	1	2	TM	Can and Nbenth	Prec	Not prec	FALSE	TRUE			Unknown Protein (AHRD V1)
Solyc10g074870.1.1	1	2	TM	Can and Nbenth	Prec	Not prec	FALSE	TRUE			KH domain containing RNA binding signal transduction associated 1 (AHRD V1 *--- Q29RQ2_BOVIN); contains Interpro domain(s) IPR004087 K Homology
Solyc01g098500.2.1	1	2	TM	Can and Nbenth	Prec	Not prec	FALSE	FALSE			Glucose transporter 8 (AHRD V1 ***- Q2KKJ3_SOLIN); contains Interpro domain(s) IPR003663 Sugar/inositol transporter
Solyc09g025280.1.1	1	2	TM	Can and Nbenth	Prec	Not prec	FALSE	FALSE			Light-dependent short hypocotyls 1 (AHRD V1 ***- D7M6V0_ARALY); contains Interpro domain(s) IPR006936 Protein of unknown function DUF640
Solyc07g065540.1.1	1	2	TM	Can and Nbenth	Prec	Not prec	FALSE	TRUE			Fasciclin-like arabinogalactan protein 10 (AHRD V1 ***- A9XTL5_GOSHI); contains Interpro domain(s) IPR000782 FAS1 domain
Solyc09g091060.2.1	1	2	TM	Can and Nbenth	Prec	Not prec	FALSE	TRUE			Unknown Protein (AHRD V1)
Solyc06g062790.2.1	1	2	TM	Can and Nbenth	Prec	Not prec	FALSE	TRUE			Casein kinase I-like (AHRD V1 ***- Q8LR51_ORYSJ); contains Interpro domain(s) IPR002290 Serine/threonine protein kinase
Solyc09g005690.2.1	1	2	TM	Can and Nbenth	Prec	Not prec	FALSE	TRUE			Inositol-1 4 5-trisphosphate 5-Phosphatase-like protein (AHRD V1 ***- Q9M1W5_ARATH); contains Interpro domain(s) IPR000300 Inositol polyphosphate related phosphatase
Solyc06g066340.2.1	1	2	TM	Can and Nbenth	Prec	Not prec	FALSE	TRUE	G2-like		Myb family transcription factor-like protein (AHRD V1 *--- Q84UP8_ORYSJ); contains Interpro domain(s) IPR006447 Myb-like DNA-binding region, SHAQKYF class
Solyc04g015970.2.1	1	2	TM	Can and Nbenth	Prec	Not prec	FALSE	TRUE			ATP-binding cassette 1 (AHRD V1 *-*- Q80ZB2_RAT); contains Interpro domain(s) IPR003439 ABC transporter-like
Solyc02g067040.2.1	1	2	TM	Can and Nbenth	Prec	Not prec	FALSE	TRUE			cDNA clone J075153F01 full insert sequence (AHRD V1 *--- B7F9A7_ORYSJ); contains Interpro domain(s) IPR009769 Protein of unknown function DUF1336
Solyc01g005300.2.1	1	2	TM	Can and Nbenth	Prec	Not prec	FALSE	TRUE			Flavin-binding kelch domain F box protein (AHRD V1 **-* D7KVS5_ARALY); contains Interpro domain(s) IPR015915 Kelch-type beta propeller
Solyc04g078110.1.1	1	2	TM	Can and Nbenth	Prec	Not prec	FALSE	TRUE			Subtilisin-like protease (AHRD V1 **-- A9XG40_TOBAC); contains Interpro domain(s) IPR015500 Peptidase S8, subtilisin-related
Solyc08g077010.1.1	1	2	TM	Can and Nbenth	Prec	Not prec	FALSE	TRUE			AT-hook DNA-binding protein (Fragment) (AHRD V1 *--* A1DR79_CATRO); contains Interpro domain(s) IPR014476 Predicted AT-hook DNA-binding
Solyc07g053290.2.1	1	2	TM	Can and Nbenth	Prec	Not prec	FALSE	TRUE	bHLH	GO:0003700	BHLH transcription factor (AHRD V1 *--* B4FMK3_MAIZE); contains Interpro domain(s) IPR001092 Basic helix-loop-helix dimerisation region bHLH
Solyc04g080820.2.1	1	2	TM	Can and Nbenth	Prec	Not prec	FALSE	TRUE			Cytokinin oxidase/dehydrogenase (AHRD V1 **** C3VPM7_SOLTU); contains Interpro domain(s) IPR015345 Cytokinin dehydrogenase 1, FAD and cytokinin binding
Solyc06g065100.2.1	1	2	TM	Can and Nbenth	Prec	Not prec	FALSE	TRUE	MYB	GO:0003700	Myb-like transcription factor 1 (AHRD V1 **** Q8H271_GOSHI); contains Interpro domain(s) IPR015495 Myb transcription factor
Solyc01g080960.2.1	1	2	TM	Can and Nbenth	Prec	Not prec	FALSE	TRUE			AT-hook DNA-binding protein (Fragment) (AHRD V1 *--* A1DR79_CATRO); contains Interpro domain(s) IPR014476 Predicted AT-hook DNA-binding
Solyc12g008640.1.1	1	2	TM	Can and Nbenth	Prec	Not prec	FALSE	TRUE			Gamma-glutamyltransferase-like protein (AHRD V1 ***- Q9M0G0_ARATH); contains Interpro domain(s) IPR000101 Gamma-glutamyltranspeptidase
Solyc08g074390.2.1	1	2	TM	Can and Nbenth	Prec	Not prec	FALSE	TRUE			Glucan endo-1 3-beta-glucosidase 6 (AHRD V1 ***- B6TW83_MAIZE); contains Interpro domain(s) IPR013781 Glycoside hydrolase, subgroup, catalytic core
Solyc11g064800.1.1	1	2	TM	Can and Nbenth	Prec	Not prec	FALSE	TRUE	SRS		Stylish (AHRD V1 *--- D2KC71_BRARP); contains Interpro domain(s) IPR007818 Protein of unknown function DUF702
Solyc08g079030.2.1	1	2	TM	Can and Nbenth	Prec	Not prec	FALSE	TRUE			Unknown Protein (AHRD V1); contains Interpro domain(s) IPR008581 Protein of unknown function DUF863, plant
Solyc03g006240.2.1	1	2	TM	Can and Nbenth	Prec	Not prec	FALSE	FALSE			GDSL esterase/lipase At5g45910 (AHRD V1 ***- GDL83_ARATH); contains Interpro domain(s) IPR001087 Lipase, GDSL
Solyc04g077480.2.1	1	2	TM	Can and Nbenth	Prec	Not prec	FALSE	TRUE	bHLH	GO:0003700	Transcription factor (AHRD V1 *-** D6MKM4_9ASPA); contains Interpro domain(s) IPR011598 Helix-loop-helix DNA-binding
Solyc01g009860.2.1	1	2	TM	Can and Nbenth	Prec	Not prec	FALSE	FALSE	NAC	GO:0003700	NAC domain transcription factor (AHRD V1 **** Q5DM36_WHEAT); contains Interpro domain(s) IPR003441 No apical meristem (NAM) protein
Solyc02g084960.1.1	1	2	TM	Can and Nbenth	Prec	Not prec	FALSE	TRUE			Genomic DNA chromosome 5 TAC clone K1F13 (AHRD V1 ***- Q9FJZ5_ARATH)
Solyc03g115770.2.1	1	2	TM	Can and Nbenth	Prec	Not prec	FALSE	TRUE			Timing of CAB expression-like
Solyc09g010230.1.1	1	2	TM	Can and Nbenth	Prec	Not prec	FALSE	TRUE	B3	GO:0003700	Auxin response factor 24 (AHRD V1 *-** D9HNV1_MAIZE); contains Interpro domain(s) IPR003340 Transcriptional factor B3
Solyc03g063550.1.1	1	2	TM	Can and Nbenth	Prec	Not prec	FALSE	TRUE			Unknown Protein (AHRD V1)
Solyc08g080460.1.1	1	2	TM	Can and Nbenth	Prec	Not prec	FALSE	TRUE			Serine/threonine protein kinase (AHRD V1 *-** C4PKQ3_PRUPE); contains Interpro domain(s) IPR002290 Serine/threonine protein kinase
Solyc09g098420.1.1	1	2	TM	Can and Nbenth	Prec	Not prec	FALSE	TRUE			Receptor like kinase, RLK
Solyc03g121270.2.1	1	2	TM	Can and Nbenth	Prec	Not prec	FALSE	FALSE			IAA-amino acid hydrolase (AHRD V1 **** D5FTH2_POPTO); contains Interpro domain(s) IPR017439 Peptidase M20D, mername-AA028/carboxypeptidase Ss1
Solyc02g087010.2.1	1	2	TM	Can and Nbenth	Prec	Not prec	FALSE	TRUE			NHL repeat-containing protein (AHRD V1 ***- D7KY00_ARALY); contains Interpro domain(s) IPR001258 NHL repeat
Solyc08g079650.2.1	1	2	TM	Can and Nbenth	Prec	Not prec	FALSE	TRUE			ACT domain containing protein expressed (AHRD V1 **-- Q10P43_ORYSJ); contains Interpro domain(s) IPR002912 Amino acid-binding ACT
Solyc06g083370.2.1	1	2	TM	Can and Nbenth	Prec	Not prec	FALSE	FALSE			Os01g0917200 protein (Fragment) (AHRD V1 ***- Q0JGL5_ORYSJ); contains Interpro domain(s) IPR009003 Peptidase, trypsin-like serine and cysteine
Solyc06g054250.2.1	1	2	TM	Can and Nbenth	Prec	Prec	TRUE	TRUE			5&apos-nucleotidase surE (AHRD V1 ***- D6YVT2_WADCW); contains Interpro domain(s) IPR002828 Survival protein SurE-like phosphatase/nucleotidase
Solyc12g005030.1.1	1	2	TM	Can and Nbenth	Prec	Prec	TRUE	FALSE			Calcium-dependent protein kinase (AHRD V1 ***- Q9XER6_SOLTU); contains Interpro domain(s) IPR002290 Serine/threonine protein kinase
Solyc09g082570.2.1	1	2	TM	Can and Nbenth	Prec	Prec	TRUE	TRUE			Neurogenic locus notch protein-like (AHRD V1 ***- B6SSE6_MAIZE)
Solyc03g117100.2.1	1	2	TM	Can and Nbenth	Prec	Prec	TRUE	TRUE			PPPDE peptidase domain-containing protein 1 (AHRD V1 *--- PPDE1_DANRE); contains Interpro domain(s) IPR008580 Protein of unknown function DUF862, eukaryotic
Solyc09g075350.2.1	1	2	TM	Can and Nbenth	Prec	Prec	TRUE	FALSE			Pectinesterase (AHRD V1 ***- B9SAU4_RICCO); contains Interpro domain(s) IPR000070 Pectinesterase, catalytic
Solyc11g032130.1.1	1	2	TM	Can and Nbenth	Prec	Prec	TRUE	FALSE			NADPH dehydrogenase 3 (AHRD V1 **-* OYE3_YEAST); contains Interpro domain(s) IPR001155 NADH:flavin oxidoreductase/NADH oxidase, N-terminal
Solyc04g077170.2.1	1	2	TM	Can and Nbenth	Prec	Prec	TRUE	TRUE			EPIDERMAL PATTERNING FACTOR-like protein 2 (AHRD V1 ***- EPFL2_ARATH)
Solyc01g109880.2.1	1	2	TM	Can and Nbenth	Prec	Prec	TRUE	TRUE	bZIP	GO:0003677	BZIP transcription factor (AHRD V1 ***- C0KYN1_SOLLC); contains Interpro domain(s) IPR011700 Basic leucine zipper
Solyc11g071470.1.1	1	2	TM	Can and Nbenth	Prec	Prec	TRUE	TRUE			Hydroxycinnamoyl CoA shikimate/quinate hydroxycinnamoyltransferase-like protein (Fragment) (AHRD V1 **-- B9GF60_POPTR); contains Interpro domain(s) IPR003480 Transferase
Solyc01g005560.2.1	1	2	TM	Can and Nbenth	Prec	Prec	TRUE	TRUE			Isocitrate dehydrogenase (AHRD V1 ***- D2D324_GOSHI); contains Interpro domain(s) IPR004790 Isocitrate dehydrogenase NADP-dependent, eukaryotic
Solyc01g099290.2.1	1	2	TM	Can and Nbenth	Prec	Prec	TRUE	FALSE			Cullin-like protein1 (AHRD V1 ***- Q8LP18_PEA); contains Interpro domain(s) IPR016159 Cullin repeat-like
Solyc04g076790.2.1	1	2	TM	Can and Nbenth	Prec	Prec	TRUE	TRUE			Serine hydroxymethyltransferase (AHRD V1 **** B9SMX7_RICCO); contains Interpro domain(s) IPR001085 Serine hydroxymethyltransferase
Solyc06g072360.2.1	1	2	TM	Can and Nbenth	Prec	Prec	TRUE	TRUE	C2H2	GO:0003700	Zinc finger protein (AHRD V1 *-*- Q764N7_MALDO); contains Interpro domain(s) IPR007087 Zinc finger, C2H2-type
Solyc11g069030.1.1	1	2	TM	Can and Nbenth	Prec	Prec	TRUE	TRUE	MYB	GO:0003677	MYB transcription factor (AHRD V1 *--- Q9T066_ARATH); contains Interpro domain(s) IPR017930 Myb-type HTH DNA-binding domain
Solyc06g071180.2.1	1	2	TM	Can and Nbenth	Prec	Prec	TRUE	FALSE			Dynein light chain 1 cytoplasmic (AHRD V1 *-*- Q7RN10_PLAYO); contains Interpro domain(s) IPR001372 Dynein light chain, type 1 and 2
Solyc08g005240.1.1	1	2	TM	Can and Nbenth	Prec	Prec	TRUE	TRUE			Lysine-specific demethylase 5B (AHRD V1 *--* KDM5B_HUMAN); contains Interpro domain(s) IPR013129 Transcription factor jumonji
Solyc12g010180.1.1	1	2	TM	Can and Nbenth	Prec	Prec	TRUE	TRUE			Anthranilate synthase (AHRD V1 ***- A1KAT4_AZOSB); contains Interpro domain(s) IPR000991 Glutamine amidotransferase class-I, C-terminal
Solyc06g074630.2.1	1	2	TM	Can and Nbenth	Prec	Prec	TRUE	TRUE			Cellulose synthase-like C6 glycosyltransferase family 2 (AHRD V1 **-* A6N4C3_PHYPA); contains Interpro domain(s) IPR001173 Glycosyl transferase, family 2
Solyc09g011750.2.1	1	2	TM	Can and Nbenth	Prec	Prec	TRUE	TRUE			Receptor-like protein kinase At5g59670 (AHRD V1 *-*- RLK7_ARATH); contains Interpro domain(s) IPR002290 Serine/threonine protein kinase
Solyc08g079020.2.1	1	2	TM	Can and Nbenth	Prec	Prec	TRUE	TRUE			Adenine phosphoribosyltransferase-like protein (AHRD V1 **** Q8LG17_ARATH); contains Interpro domain(s) IPR005764 Adenine phosphoribosyl transferase
Solyc02g079010.2.1	1	2	TM	Nbenth	Not prec	Not prec	FALSE	TRUE			Cotton fiber expressed protein 1 (AHRD V1 ***- O81373_GOSHI); contains Interpro domain(s) IPR008480 Protein of unknown function DUF761, plant
Solyc10g083210.1.1	1	2	TM	Nbenth	Not prec	Not prec	FALSE	TRUE	B3	GO:0006355	Auxin response factor 1 (AHRD V1 *-*- D9HNS8_MAIZE); contains Interpro domain(s) IPR003340 Transcriptional factor B3
Solyc03g097530.2.1	1	2	TM	Nbenth	Not prec	Not prec	FALSE	TRUE			TPD1 (AHRD V1 ***- Q6TLJ2_ARATH)
Solyc12g094520.1.1	1	2	TM	Nbenth	Not prec	Not prec	FALSE	TRUE			4-coumarate-coa ligase (AHRD V1 ***- B9MY03_POPTR); contains Interpro domain(s) IPR000873 AMP-dependent synthetase and ligase
Solyc04g010320.1.1	1	2	TM	Nbenth	Not prec	Not prec	FALSE	TRUE			Cytochrome P450
Solyc09g090760.2.1	1	2	TM	Nbenth	Not prec	Not prec	FALSE	TRUE			Folate/biopterin transporter family protein (AHRD V1 *-*- B6TYM7_MAIZE); contains Interpro domain(s) IPR004324 Biopterin transport-related protein BT1
Solyc08g075150.2.1	1	2	TM	Nbenth	Not prec	Not prec	FALSE	TRUE			Genomic DNA chromosome 5 TAC clone K9E15 (AHRD V1 *-*- Q9FH79_ARATH)
Solyc10g082020.1.1	1	2	TM	Nbenth	Not prec	Not prec	FALSE	TRUE			Cytokinin riboside 5&apos;-monophosphate phosphoribohydrolase LOG (AHRD V1 **-- LOG_ORYSJ); contains Interpro domain(s) IPR005269 Conserved hypothetical protein CHP00730
Solyc06g053830.2.1	1	2	TM	Nbenth	Not prec	Not prec	FALSE	TRUE		GO:0003700	Auxin responsive protein (AHRD V1 ***- D9IQE6_CATRO); contains Interpro domain(s) IPR003311 AUX/IAA protein
Solyc01g098650.2.1	1	2	TM	Nbenth	Not prec	Not prec	FALSE	TRUE			GDSL esterase/lipase At1g54790 (AHRD V1 ***- GDL22_ARATH); contains Interpro domain(s) IPR001087 Lipase, GDSL
Solyc01g091420.1.1	1	2	TM	Nbenth	Not prec	Not prec	FALSE	TRUE	LBD		LOB domain protein 30 (AHRD V1 ***- D7M5R6_ARALY); contains Interpro domain(s) IPR004883 Lateral organ boundaries, LOB
Solyc04g048900.2.1	1	2	TM	Nbenth	Not prec	Not prec	FALSE	FALSE			Calreticulin 2 calcium-binding protein (AHRD V1 **** A8HMC0_CHLRE); contains Interpro domain(s) IPR009169 Calreticulin
Solyc01g098820.2.1	1	2	TM	Nbenth	Not prec	Not prec	FALSE	TRUE			Phototropic-responsive NPH3 family protein (AHRD V1 **-- D7KEU3_ARALY); contains Interpro domain(s) IPR004249 NPH3
Solyc09g005070.1.1	1	2	TM	Nbenth	Not prec	Not prec	FALSE	TRUE	bHLH		Transcription factor (Fragment) (AHRD V1 *-*- D6MK13_9ASPA); contains Interpro domain(s) IPR001092 Basic helix-loop-helix dimerisation region bHLH
Solyc08g008360.2.1	1	2	TM	Nbenth	Not prec	Not prec	FALSE	TRUE			Unknown Protein (AHRD V1)
Solyc05g015910.1.1	1	2	TM	Nbenth	Not prec	Not prec	FALSE	TRUE			Glutaredoxin (AHRD V1 **** B9GZC7_POPTR); contains Interpro domain(s) IPR011905 Glutaredoxin-like, plant II
Solyc04g074700.2.1	1	2	TM	Nbenth	Not prec	Not prec	FALSE	TRUE	HD-ZIP	GO:0006355	Homeobox-leucine zipper protein (AHRD V1 *-*- Q9FXN8_ZINEL); contains Interpro domain(s) IPR003106 Leucine zipper, homeobox-associated
Solyc04g051540.2.1	1	2	TM	Nbenth	Prec	Not prec	FALSE	TRUE	WRKY		WRKY family transcription factor (AHRD V1 *-*- D7LBR5_ARALY); contains Interpro domain(s) IPR003657 DNA-binding WRKY
Solyc03g122190.2.1	1	2	TM	Nbenth	Prec	Not prec	FALSE	TRUE			Jasmonate ZIM domain 2 (AHRD V1 **-- C7SCY2_CATRO); contains Interpro domain(s) IPR010399 Tify
Solyc08g080210.2.1	1	2	TM	Nbenth	Prec	Not prec	FALSE	FALSE			DNA-directed RNA polymerase (AHRD V1 ***- B9GKP9_POPTR); contains Interpro domain(s) IPR000722 RNA polymerase, alpha subunit
Solyc08g080520.2.1	1	2	TM	Nbenth	Prec	Not prec	FALSE	TRUE			AT5g06970/MOJ9_14 (AHRD V1 **-- Q8RX56_ARATH); contains Interpro domain(s) IPR008528 Protein of unknown function DUF810
Solyc01g088660.2.1	1	2	TM	Nbenth	Prec	Not prec	FALSE	TRUE			Os04g0585900 protein (Fragment) (AHRD V1 *-*- Q0JAP2_ORYSJ); contains Interpro domain(s) IPR007650 Protein of unknown function DUF581
Solyc04g071990.2.1	1	2	TM	Nbenth	Prec	Not prec	FALSE	TRUE			Tomato GIGANTEA 1
Solyc02g071220.2.1	1	2	TM	Nbenth	Prec	Not prec	FALSE	FALSE		GO:0003700	Response regulator 5 (AHRD V1 ***- Q9FRZ0_MAIZE); contains Interpro domain(s) IPR001789 Signal transduction response regulator, receiver region
Solyc07g042270.2.1	1	2	TM	Nbenth	Prec	Not prec	FALSE	FALSE			ATP-dependent RNA helicase (AHRD V1 **** C6LZE8_GIALA); contains Interpro domain(s) IPR011545 DNA/RNA helicase, DEAD/DEAH box type, N-terminal
Solyc07g043310.2.1	1	2	TM	Nbenth	Prec	Not prec	FALSE	FALSE			Aminotransferase (AHRD V1 ***- D2KZ08_WHEAT); contains Interpro domain(s) IPR005814 Aminotransferase class-III
Solyc07g042550.2.1	1	2	TM	Nbenth	Prec	Not prec	FALSE	TRUE			Sucrose synthase (AHRD V1 **** O82691_SOLLC); contains Interpro domain(s) IPR012820 Sucrose synthase, plants and cyanobacteria IPR000368 Sucrose synthase
Solyc03g006590.2.1	1	2	TM	Nbenth	Prec	Not prec	FALSE	TRUE			Unknown Protein (AHRD V1)
Solyc09g042660.2.1	1	2	TM	Nbenth	Prec	Not prec	FALSE	TRUE			CBL-interacting protein kinase 22 (AHRD V1 **** A0MNK8_POPTR); contains Interpro domain(s) IPR002290 Serine/threonine protein kinase
Solyc04g014360.2.1	1	2	TM	Nbenth	Prec	Not prec	FALSE	TRUE	bHLH	GO:0003700	Transcription factor SPATULA (AHRD V1 *-** SPT_ARATH); contains Interpro domain(s) IPR001092 Basic helix-loop-helix dimerisation region bHLH
Solyc09g014900.2.1	1	2	TM	Nbenth	Prec	Not prec	FALSE	TRUE			Cytochrome P450
Solyc08g008310.2.1	1	2	TM	Nbenth	Prec	Not prec	FALSE	TRUE			Long-chain-fatty-acid-CoA ligase (AHRD V1 **** B2WS80_ARAHA); contains Interpro domain(s) IPR000873 AMP-dependent synthetase and ligase
Solyc12g008530.1.1	1	2	TM	Nbenth	Prec	Not prec	FALSE	TRUE			Pectinesterase (AHRD V1 ***- B9RKG6_RICCO); contains Interpro domain(s) IPR000070 Pectinesterase, catalytic
Solyc06g051190.1.1	1	2	TM	Nbenth	Prec	Not prec	FALSE	FALSE			RNA-dependent RNA polymerase family protein (AHRD V1 ***- D7L6F5_ARALY); contains Interpro domain(s) IPR007855 RNA-dependent RNA polymerase, eukaryotic-type
Solyc05g047710.2.1	1	2	TM	Nbenth	Prec	Not prec	FALSE	TRUE			Plant synaptotagmin (AHRD V1 **-- C5X3E4_SORBI); contains Interpro domain(s) IPR018029 C2 membrane targeting protein
Solyc07g006500.2.1	1	3	FM	Can	Not prec	Not prec	FALSE	FALSE			Alpha alpha-trehalose-phosphate synthase (UDP-forming) (AHRD V1 **** D2REU5_ARCPA); contains Interpro domain(s) IPR001830 Glycosyl transferase, family 20
Solyc08g075940.2.1	1	3	FM	Can	Not prec	Not prec	FALSE	FALSE			DNA-directed RNA polymerase (AHRD V1 ***- B9IL57_POPTR); contains Interpro domain(s) IPR015712 DNA-directed RNA polymerase, subunit 2
Solyc08g083050.1.1	1	3	FM	Can	Not prec	Not prec	FALSE	TRUE			Unknown Protein (AHRD V1)
Solyc03g120870.2.1	1	3	FM	Can	Not prec	Not prec	FALSE	TRUE			UPF0497 membrane protein 14 (AHRD V1 ***- U497E_VITVI); contains Interpro domain(s) IPR006459 Uncharacterised protein family UPF0497, trans-membrane plant subgroup
Solyc10g083730.1.1	1	3	FM	Can	Not prec	Not prec	FALSE	FALSE			F-box protein PP2-B1 (AHRD V1 *-*- PP2B1_ARATH); contains Interpro domain(s) IPR001810 Cyclin-like F-box
Solyc07g052100.2.1	1	3	FM	Can	Not prec	Not prec	FALSE	TRUE			Chromodomain-helicase-DNA-binding protein 1-like (AHRD V1 *--* CHD1L_DANRE); contains Interpro domain(s) IPR014001 DEAD-like helicase, N-terminal
Solyc04g074850.2.1	1	3	FM	Can	Not prec	Not prec	FALSE	FALSE			Multidrug resistance protein mdtK (AHRD V1 **-- MDTK_YERP3); contains Interpro domain(s) IPR002528 Multi antimicrobial extrusion protein MatE
Solyc09g075420.2.1	1	3	FM	Can	Not prec	Not prec	FALSE	TRUE	ERF	GO:0003677	Ethylene responsive transcription factor 2b (AHRD V1 *-*- C0J9I6_9ROSA); contains Interpro domain(s) IPR001471 Pathogenesis-related transcriptional factor and ERF, DNA-binding IPR001711 Phospholipase C, phosphatidylinositol-specific, Y domain
Solyc03g117980.2.1	1	3	FM	Can	Not prec	Not prec	FALSE	TRUE			Respiratory burst oxidase-like protein (AHRD V1 **** C1IHQ9_9ROSI); contains Interpro domain(s) IPR013121 Ferric reductase, NAD binding
Solyc01g067510.2.1	1	3	FM	Can	Not prec	Not prec	FALSE	TRUE			Receptor-like kinase (AHRD V1 **** A7VM36_MARPO); contains Interpro domain(s) IPR002290 Serine/threonine protein kinase
Solyc01g080900.2.1	1	3	FM	Can	Not prec	Not prec	FALSE	TRUE			Cytochrome P450
Solyc05g055400.2.1	1	3	FM	Can	Not prec	Not prec	FALSE	TRUE			Cytochrome P450
Solyc04g054990.2.1	1	3	FM	Can	Not prec	Not prec	FALSE	FALSE			Lipoxygenase homology domain-containing protein 1 (AHRD V1 *--- LOXH1_HUMAN); contains Interpro domain(s) IPR001024 Lipoxygenase, LH2
Solyc06g007180.2.1	1	3	FM	Can	Not prec	Not prec	FALSE	TRUE			Asparagine synthase (Glutamine-hydrolyzing) (AHRD V1 **** A9EDI4_9FLAO); contains Interpro domain(s) IPR006426 Asparagine synthase, glutamine-hydrolyzing
Solyc12g094450.1.1	1	3	FM	Can	Not prec	Prec	FALSE	TRUE			Peroxisomal multifunctional enzyme type 2 (AHRD V1 **-- B4FP93_MAIZE); contains Interpro domain(s) IPR002539 MaoC-like dehydratase
Solyc08g074480.1.1	1	3	FM	Can	Not prec	Prec	FALSE	TRUE			Cortical cell-delineating protein (AHRD V1 **-- B6UGA2_MAIZE); contains Interpro domain(s) IPR013770 Plant lipid transfer protein and hydrophobic protein, helical
Solyc09g090070.1.1	1	3	FM	Can	Not prec	Prec	FALSE	TRUE			Inorganic phosphate transporter (AHRD V1 **** O22548_SOLLC); contains Interpro domain(s) IPR004738 Phosphate permease
Solyc10g005210.2.1	1	3	FM	Can	Not prec	Prec	FALSE	TRUE			DNA-3-methyladenine glycosylase I (AHRD V1 ***- B4FWT0_MAIZE); contains Interpro domain(s) IPR005019 Methyladenine glycosylase
Solyc12g013700.1.1	1	3	FM	Can	Not prec	Prec	FALSE	FALSE			Aluminum-induced protein-like protein (AHRD V1 ***- Q8S2R9_THEHA)
Solyc07g061730.2.1	1	3	FM	Can	Not prec	Prec	FALSE	FALSE			Gibberellin 2-oxidase (AHRD V1 **** A4GVL9_SOLLC); contains Interpro domain(s) IPR005123 Oxoglutarate and iron-dependent oxygenase
Solyc07g063640.1.1	1	3	FM	Can	Not prec	Prec	FALSE	TRUE			Wound induced protein (AHRD V1 ***- B6SKC8_MAIZE)
Solyc03g006490.2.1	1	3	FM	Can	Not prec	Prec	FALSE	TRUE			Aluminum-induced protein-like (AHRD V1 ***- Q9FG81_ARATH)
Solyc01g107390.2.1	1	3	FM	Can	Not prec	Prec	FALSE	TRUE			Auxin-responsive GH3 product (AHRD V1 ***- Q05680_SOYBN); contains Interpro domain(s) IPR004993 GH3 auxin-responsive promoter
Solyc12g010910.1.1	1	3	FM	Can	Not prec	Prec	FALSE	TRUE			Lipase (Fragment) (AHRD V1 ***- Q9ZTW1_DIACA); contains Interpro domain(s) IPR002921 Lipase, class 3
Solyc06g083900.2.1	1	3	FM	Can	Not prec	Prec	FALSE	FALSE	MYB	GO:0003700	Myb-related transcription factor (AHRD V1 **-* B2CZJ1_CAPAN); contains Interpro domain(s) IPR015495 Myb transcription factor
Solyc01g094870.1.1	1	3	FM	Can	Not prec	Prec	FALSE	FALSE			MRNA clone RAFL21-92-I07 (AHRD V1 *--- Q681W9_ARATH); contains Interpro domain(s) IPR006461 Protein of unknown function Cys-rich
Solyc03g112160.2.1	1	3	FM	Can	Not prec	Prec	FALSE	FALSE			Protein DEHYDRATION-INDUCED 19 homolog 5 (AHRD V1 ***- DI195_ORYSJ); contains Interpro domain(s) IPR008598 Drought induced 19
Solyc04g014800.2.1	1	3	FM	Can	Not prec	Prec	FALSE	FALSE			L-galactose-1-phosphate phosphatase 2
Solyc12g008400.1.1	1	3	FM	Can	Not prec	Prec	FALSE	FALSE			Receptor like kinase, RLK
Solyc04g007340.2.1	1	3	FM	Can	Not prec	Prec	FALSE	FALSE			Unknown Protein (AHRD V1); contains Interpro domain(s) IPR012438 Protein of unknown function DUF1639
Solyc08g078670.2.1	1	3	FM	Can	Not prec	Prec	FALSE	FALSE			Aspartyl protease (AHRD V1 **-- B8YIB7_MIRJA); contains Interpro domain(s) IPR001461 Peptidase A1
Solyc02g089200.2.1	1	3	FM	Can	Not prec	Prec	FALSE	TRUE	MIKC	GO:0003700	MADS-box transcription factor (AHRD V1 **** Q3KSZ0_PRUDU); contains Interpro domain(s) IPR002100 Transcription factor, MADS-box IPR002487 Transcription factor, K-box
Solyc04g083160.1.1	1	3	FM	Can	Not prec	Prec	FALSE	FALSE			cytochrome P450
Solyc10g086500.1.1	1	3	FM	Can	Not prec	Prec	FALSE	FALSE			3-oxo-5-alpha-steroid 4-dehydrogenase family protein expressed (AHRD V1 ***- Q53NE6_ORYSJ); contains Interpro domain(s) IPR016636 3-oxo-5-alpha-steroid 4-dehydrogenase IPR001104 3-oxo-5-alpha-steroid 4-dehydrogenase, C-terminal
Solyc04g082030.1.1	1	3	FM	Can	Not prec	Prec	FALSE	FALSE			Ornithine decarboxylase (AHRD V1 **** Q9SXF3_TOBAC); contains Interpro domain(s) IPR002433 Ornithine decarboxylase
Solyc01g094970.2.1	1	3	FM	Can	Not prec	Prec	FALSE	FALSE			Glycoside hydrolase family 28 protein/polygalacturonase family protein (AHRD V1 **-- Q1PF10_ARATH); contains Interpro domain(s) IPR012334 Pectin lyase fold
Solyc02g087510.2.1	1	3	FM	Can	Not prec	Prec	FALSE	TRUE			Ribosomal protein S6 kinase alpha-2 (AHRD V1 *-** KS6A2_HUMAN); contains Interpro domain(s) IPR002290 Serine/threonine protein kinase
Solyc04g072030.1.1	1	3	FM	Can	Not prec	Prec	FALSE	FALSE			Interferon-induced GTP-binding protein Mx (Fragment) (AHRD V1 *--- MX_PERFL); contains Interpro domain(s) IPR015577 Interferon-induced Mx protein
Solyc04g076630.2.1	1	3	FM	Can	Not prec	Prec	FALSE	FALSE			Rhamnogalacturonate lyase (AHRD V1 **** A3XLZ2_LEEBM); contains Interpro domain(s) IPR010325 Rhamnogalacturonate lyase
Solyc03g033330.2.1	1	3	FM	Can	Not prec	Prec	FALSE	FALSE			RING finger protein 44 (AHRD V1 *-*- RNF44_MOUSE); contains Interpro domain(s) IPR018957 Zinc finger, C3HC4 RING-type
Solyc02g065290.1.1	1	3	FM	Can	Not prec	Prec	FALSE	FALSE	Dof	GO:0003700	Dof zinc finger protein 6 (AHRD V1 *-*- A5HWF5_HORVD); contains Interpro domain(s) IPR003851 Zinc finger, Dof-type
Solyc07g055270.1.1	1	3	FM	Can	Not prec	Prec	FALSE	TRUE			Unknown Protein (AHRD V1)
Solyc06g068550.2.1	1	3	FM	Can	Not prec	Prec	FALSE	FALSE			Aspartic proteinase nepenthesin-1 (AHRD V1 **-- C0JAB4_ORYCO); contains Interpro domain(s) IPR001461 Peptidase A1
Solyc04g077860.2.1	1	3	FM	Can	Not prec	Prec	FALSE	FALSE			Hydrolase alpha/beta fold family protein expressed (AHRD V1 **** Q10J20_ORYSJ); contains Interpro domain(s) IPR000073 Alpha/beta hydrolase fold-1
Solyc01g108910.2.1	1	3	FM	Can	Not prec	Prec	FALSE	FALSE			COSII_At2g15890 (Fragment) (AHRD V1 *-*- C0KFD9_9SOLN)
Solyc11g066130.1.1	1	3	FM	Can and Nbenth	Not prec	Not prec	FALSE	FALSE			Thaumatin-like protein (AHRD V1 **-- D2KU75_CITJA); contains Interpro domain(s) IPR017949 Thaumatin, conserved site IPR001938 Thaumatin, pathogenesis-related
Solyc04g063210.2.1	1	3	FM	Can and Nbenth	Not prec	Not prec	FALSE	TRUE			Caffeoyl-CoA O-methyltransferase (AHRD V1 **** A0SDG2_9CONI); contains Interpro domain(s) IPR002935 O-methyltransferase, family 3
Solyc04g008060.2.1	1	3	FM	Can and Nbenth	Not prec	Not prec	FALSE	TRUE			Vacuolar iron transporter Ccc1 (AHRD V1 **-* C5GIS5_AJEDR); contains Interpro domain(s) IPR008217 Protein of unknown function DUF125, transmembrane
Solyc12g006860.1.1	1	3	FM	Can and Nbenth	Not prec	Not prec	FALSE	TRUE			Cytochrome P450
Solyc04g074080.2.1	1	3	FM	Can and Nbenth	Not prec	Not prec	FALSE	FALSE			WW domain containing protein expressed (AHRD V1 *-*- Q2QVE4_ORYSJ); contains Interpro domain(s) IPR001202 WW/Rsp5/WWP
Solyc02g079190.2.1	1	3	FM	Can and Nbenth	Not prec	Not prec	FALSE	TRUE			Auxin F-box protein 5 (AHRD V1 **-- D7MPH1_ARALY); contains Interpro domain(s) IPR001810 Cyclin-like F-box
Solyc09g009260.2.1	1	3	FM	Can and Nbenth	Not prec	Not prec	FALSE	TRUE			Fructose-bisphosphate aldolase (AHRD V1 ***- Q2PYX3_SOLTU); contains Interpro domain(s) IPR000741 Fructose-bisphosphate aldolase, class-I
Solyc12g005990.1.1	1	3	FM	Can and Nbenth	Not prec	Not prec	FALSE	TRUE			Dual specificity protein phosphatase 4 (AHRD V1 ***- B6U4B9_MAIZE); contains Interpro domain(s) IPR020422 Dual specificity phosphatase, subgroup, catalytic domain
Solyc06g053480.2.1	1	3	FM	Can and Nbenth	Not prec	Not prec	FALSE	TRUE			Stearoyl-acyl carrier protein desaturase (AHRD V1 **** B7TZ44_SPIOL); contains Interpro domain(s) IPR005067 Fatty acid desaturase, type 2
Solyc01g090460.2.1	1	3	FM	Can and Nbenth	Not prec	Not prec	FALSE	FALSE	HD-ZIP		Homeobox-leucine zipper protein (AHRD V1 *-*- Q39862_SOYBN); contains Interpro domain(s) IPR001356 Homeobox IPR017970 Homeobox, conserved site
Solyc07g062820.1.1	1	3	FM	Can and Nbenth	Not prec	Not prec	FALSE	TRUE			Pentatricopeptide repeat protein PPR1106-17 (AHRD V1 ***- B6SWY6_MAIZE); contains Interpro domain(s) IPR002885 Pentatricopeptide repeat
Solyc11g016970.1.1	1	3	FM	Can and Nbenth	Not prec	Not prec	FALSE	FALSE			Multidrug resistance protein mdtK (AHRD V1 *-*- MDTK_ENTS8); contains Interpro domain(s) IPR002528 Multi antimicrobial extrusion protein MatE
Solyc01g099910.2.1	1	3	FM	Can and Nbenth	Not prec	Not prec	FALSE	TRUE			Epoxide hydrolase (AHRD V1 ***- B3VMR4_NICBE); contains Interpro domain(s) IPR000639 Epoxide hydrolase-like
Solyc03g114460.2.1	1	3	FM	Can and Nbenth	Not prec	Not prec	FALSE	TRUE			Acetyl-coenzyme A synthetase (AHRD V1 ***- D5HA95_SALRM); contains Interpro domain(s) IPR000873 AMP-dependent synthetase and ligase
Solyc02g087620.2.1	1	3	FM	Can and Nbenth	Not prec	Not prec	FALSE	TRUE			Inositol hexakisphosphate and diphosphoinositol-pentakisphosphate kinase 2 (AHRD V1 **-* VIP2_MOUSE); contains Interpro domain(s) IPR000560 Histidine acid phosphatase
Solyc11g009050.1.1	1	3	FM	Can and Nbenth	Not prec	Not prec	FALSE	TRUE			F-box protein-like (AHRD V1 ***- Q67X80_ORYSJ); contains Interpro domain(s) IPR001810 Cyclin-like F-box
Solyc01g102470.2.1	1	3	FM	Can and Nbenth	Not prec	Not prec	FALSE	FALSE			Pentatricopeptide repeat-containing protein (AHRD V1 *-*- D7MEW5_ARALY); contains Interpro domain(s) IPR002885 Pentatricopeptide repeat
Solyc03g123610.2.1	1	3	FM	Can and Nbenth	Not prec	Not prec	FALSE	TRUE			Alanine aminotransferase (AHRD V1 ***- Q6VEJ5_CAPAN); contains Interpro domain(s) IPR004839 Aminotransferase, class I and II
Solyc10g076510.1.1	1	3	FM	Can and Nbenth	Not prec	Not prec	FALSE	TRUE			Pyruvate decarboxylase (AHRD V1 **** B0ZS79_PRUAR); contains Interpro domain(s) IPR012110 Pyruvate decarboxylase/indolepyruvate decarboxylase
Solyc01g107980.2.1	1	3	FM	Can and Nbenth	Not prec	Not prec	FALSE	TRUE			U-box domain-containing protein (AHRD V1 ***- A8IXJ0_BRACM); contains Interpro domain(s) IPR011989 Armadillo-like helical
Solyc01g111880.2.1	1	3	FM	Can and Nbenth	Not prec	Not prec	FALSE	TRUE			Tyrosine-protein kinase transforming protein Src (AHRD V1 *-** SRC_AVIST); contains Interpro domain(s) IPR015783 ATMRK serine/threonine protein kinase-like
Solyc09g072630.2.1	1	3	FM	Can and Nbenth	Not prec	Not prec	FALSE	TRUE			LRR receptor-like serine/threonine-protein kinase, RLP
Solyc06g048410.2.1	1	3	FM	Can and Nbenth	Not prec	Not prec	FALSE	TRUE			Superoxide dismutase (AHRD V1 **** Q7YK44_SOLLC); contains Interpro domain(s) IPR019833 Manganese/iron superoxide dismutase, binding site IPR001189 Manganese/iron superoxide dismutase
Solyc04g076830.2.1	1	3	FM	Can and Nbenth	Not prec	Not prec	FALSE	TRUE			Phosphoglycerate mutase-like protein (AHRD V1 ***- Q8LGT8_SOYBN); contains Interpro domain(s) IPR013078 Phosphoglycerate mutase
Solyc01g010970.2.1	1	3	FM	Can and Nbenth	Not prec	Not prec	FALSE	FALSE			ARGONAUTE 1 (AHRD V1 ***- D6RUV9_TOBAC); contains Interpro domain(s) IPR003165 Stem cell self-renewal protein Piwi
Solyc08g074630.1.1	1	3	FM	Can and Nbenth	Not prec	Not prec	FALSE	FALSE			Polyphenol oxidase (AHRD V1 ***- Q41428_SOLTU); contains Interpro domain(s) IPR016213 Polyphenol oxidase, plant
Solyc02g068410.1.1	1	3	FM	Can and Nbenth	Not prec	Not prec	FALSE	FALSE			AT4G20050-like protein (Fragment) (AHRD V1 *-*- D6PQZ2_9BRAS); contains Interpro domain(s) IPR011050 Pectin lyase fold/virulence factor
Solyc08g063040.2.1	1	3	FM	Can and Nbenth	Not prec	Not prec	FALSE	TRUE	C2H2		Zinc finger protein (AHRD V1 *-*- Q9LVQ7_ARATH); contains Interpro domain(s) IPR007087 Zinc finger, C2H2-type
Solyc10g005000.2.1	1	3	FM	Can and Nbenth	Not prec	Not prec	FALSE	TRUE			Os03g0648300 protein (Fragment) (AHRD V1 *--- Q0DPZ6_ORYSJ); contains Interpro domain(s) IPR000048 IQ calmodulin-binding region
Solyc11g071480.1.1	1	3	FM	Can and Nbenth	Not prec	Not prec	FALSE	TRUE			Hydroxycinnamoyl CoA shikimate/quinate hydroxycinnamoyltransferase-like protein (Fragment) (AHRD V1 **-- B9GF60_POPTR); contains Interpro domain(s) IPR003480 Transferase
Solyc04g078540.2.1	1	3	FM	Can and Nbenth	Not prec	Prec	FALSE	FALSE			Cathepsin B-like cysteine proteinase (AHRD V1 **-* CYSP_SCHMA); contains Interpro domain(s) IPR013128 Peptidase C1A, papain
Solyc07g063940.1.1	1	3	FM	Can and Nbenth	Not prec	Prec	FALSE	FALSE	GRAS	GO:0003700	GRAS family transcription factor (AHRD V1 **-* B9I7E1_POPTR); contains Interpro domain(s) IPR005202 GRAS transcription factor
Solyc08g083210.2.1	1	3	FM	Can and Nbenth	Not prec	Prec	FALSE	TRUE			Endoglucanase 1 (AHRD V1 ***- B6U0P7_MAIZE); contains Interpro domain(s) IPR001701 Glycoside hydrolase, family 9
Solyc04g080290.2.1	1	3	FM	Can and Nbenth	Not prec	Prec	FALSE	FALSE			CRAL/TRIO domain containing protein expressed (AHRD V1 **-- Q75GU9_ORYSJ); contains Interpro domain(s) IPR001251 Cellular retinaldehyde-binding/triple function, C-terminal
Solyc02g081120.2.1	1	3	FM	Can and Nbenth	Not prec	Prec	FALSE	TRUE	TALE		Knotted-1-like homeobox protein H1 (AHRD V1 ***- Q8GUS6_TOBAC); contains Interpro domain(s) IPR005541 KNOX2
Solyc02g081010.1.1	1	3	FM	Can and Nbenth	Not prec	Prec	FALSE	TRUE		GO:0003700	Transcription factor jumonji domain-containing protein (AHRD V1 **-* D7KN75_ARALY); contains Interpro domain(s) IPR013129 Transcription factor jumonji
Solyc04g071890.2.1	1	3	FM	Can and Nbenth	Not prec	Prec	FALSE	FALSE			Peroxidase 4 (AHRD V1 **** B7UCP4_LITCN); contains Interpro domain(s) IPR002016 Haem peroxidase, plant/fungal/bacterial
Solyc04g082880.2.1	1	3	FM	Can and Nbenth	Not prec	Prec	FALSE	TRUE			Diphosphate--fructose-6-phosphate 1-phosphotransferase (AHRD V1 ***- C8PT93_9SPIO); contains Interpro domain(s) IPR011183 Pyrophosphate-dependent phosphofructokinase PfpB
Solyc06g068540.2.1	1	3	FM	Can and Nbenth	Not prec	Prec	FALSE	FALSE			Transcription regulatory protein SNF5 (AHRD V1 *-*- D3B6R9_POLPA)
Solyc08g083230.1.1	1	3	FM	Can and Nbenth	Not prec	Prec	FALSE	FALSE	GRF		Growth-regulating factor 3 (AHRD V1 *--- Q6AWY6_ORYSJ); contains Interpro domain(s) IPR014977 WRC
Solyc07g042170.2.1	1	3	FM	Can and Nbenth	Not prec	Prec	FALSE	TRUE			Jasmonate ZIM-domain protein 3 (AHRD V1 **-- B3Y563_TOBAC); contains Interpro domain(s) IPR010399 Tify
Solyc01g006400.2.1	1	3	FM	Can and Nbenth	Not prec	Prec	FALSE	TRUE			Cysteine-rich extensin-like protein-4 (AHRD V1 *-*- Q08197_TOBAC)
Solyc02g088340.2.1	1	3	FM	Can and Nbenth	Not prec	Prec	FALSE	FALSE	WRKY	GO:0003700	WRKY transcription factor-c (AHRD V1 **** Q5DJV3_CAPAN); contains Interpro domain(s) IPR003657 DNA-binding WRKY
Solyc11g010710.1.1	1	3	FM	Can and Nbenth	Not prec	Prec	FALSE	FALSE	AP2	GO:0003677_GO:0006355	AP2-like ethylene-responsive transcription factor At1g16060 (AHRD V1 *-*- AP2L1_ARATH); contains Interpro domain(s) IPR001471 Pathogenesis-related transcriptional factor and ERF, DNA-binding
Solyc10g080690.1.1	1	3	FM	Can and Nbenth	Not prec	Prec	FALSE	TRUE			Patatin-like protein 3 (AHRD V1 ***- B6TPQ5_MAIZE); contains Interpro domain(s) IPR002641 Patatin
Solyc01g008110.2.1	1	3	FM	Can and Nbenth	Not prec	Prec	FALSE	TRUE			Cytochrome P450
Solyc07g047960.2.1	1	3	FM	Can and Nbenth	Not prec	Prec	FALSE	FALSE	WRKY	GO:0003700	WRKY transcription factor 2 (AHRD V1 **** C9DHZ1_9ROSI); contains Interpro domain(s) IPR003657 DNA-binding WRKY
Solyc08g076670.2.1	1	3	FM	Can and Nbenth	Not prec	Prec	FALSE	TRUE			Transmembrane protein 41B (AHRD V1 **-- TM41B_HUMAN); contains Interpro domain(s) IPR015414 SNARE associated Golgi protein
Solyc05g005150.1.1	1	3	FM	Can and Nbenth	Not prec	Prec	FALSE	FALSE			F-box/Kelch repeat-containing F-box family protein (AHRD V1 ***- C4PVT9_ARATH); contains Interpro domain(s) IPR015915 Kelch-type beta propeller
Solyc08g005560.2.1	1	3	FM	Can and Nbenth	Not prec	Prec	FALSE	FALSE			Binding protein (AHRD V1 ***- D7MGU4_ARALY)
Solyc07g007330.1.1	1	3	FM	Can and Nbenth	Not prec	Prec	FALSE	FALSE			Serine-rich protein (AHRD V1 ***- A1YMW6_BRACM)
Solyc01g079480.2.1	1	3	FM	Can and Nbenth	Not prec	Prec	FALSE	TRUE	bZIP	GO:0003700	BZIP transcription factor (AHRD V1 **-* Q1HW69_CAPAN); contains Interpro domain(s) IPR011616 bZIP transcription factor, bZIP-1
Solyc02g086180.2.1	1	3	FM	Can and Nbenth	Not prec	Prec	FALSE	FALSE			Sterol C-5 desaturase (AHRD V1 **** D7FW86_ECTSI); contains Interpro domain(s) IPR006694 Fatty acid hydroxylase
Solyc01g110570.2.1	1	3	FM	Can and Nbenth	Not prec	Prec	FALSE	TRUE			Auxin-induced SAUR-like protein (AHRD V1 **-- Q8S349_CAPAN); contains Interpro domain(s) IPR003676 Auxin responsive SAUR protein
Solyc01g105280.2.1	1	3	FM	Can and Nbenth	Not prec	Prec	FALSE	FALSE			Protein phosphatase 2C-like (AHRD V1 ***- A2Q6E4_MEDTR); contains Interpro domain(s) IPR015655 Protein phosphatase 2C
Solyc01g096080.2.1	1	3	FM	Can and Nbenth	Not prec	Prec	FALSE	FALSE			Unknown Protein (AHRD V1)
Solyc01g096100.2.1	1	3	FM	Can and Nbenth	Not prec	Prec	FALSE	FALSE			AT2G46550 protein (Fragment) (AHRD V1 ***- B9DHY8_ARATH)
Solyc04g081240.2.1	1	3	FM	Can and Nbenth	Not prec	Prec	FALSE	FALSE	ARF		Auxin response factor 5 (AHRD V1 ***- D9IVB5_SOLLC); contains Interpro domain(s) IPR010525 Auxin response factor
Solyc04g050960.2.1	1	3	FM	Can and Nbenth	Not prec	Prec	FALSE	FALSE			Chromatin remodeling complex subunit (AHRD V1 *--- B9N3S4_POPTR); contains Interpro domain(s) IPR012287 Homeodomain-related
Solyc11g011310.1.1	1	3	FM	Can and Nbenth	Not prec	Prec	FALSE	TRUE			Rhamnogalacturonate lyase (AHRD V1 ***- A3XLZ2_LEEBM); contains Interpro domain(s) IPR010325 Rhamnogalacturonate lyase
Solyc06g073730.1.1	1	3	FM	Can and Nbenth	Not prec	Prec	FALSE	FALSE	EIL	GO:0003700	Ethylene insensitive 3 class transcription factor (AHRD V1 **** D5L146_MALDO); contains Interpro domain(s) IPR006957 Ethylene insensitive 3
Solyc01g110350.2.1	1	3	FM	Can and Nbenth	Not prec	Prec	FALSE	TRUE			Unknown Protein (AHRD V1)
Solyc02g063450.2.1	1	3	FM	Can and Nbenth	Not prec	Prec	FALSE	FALSE			Hypothetical YFW family protein 5 (AHRD V1 *--- Q5AP84_CANAL); contains Interpro domain(s) IPR009836 Protein of unknown function DUF1399
Solyc05g010590.2.1	1	3	FM	Can and Nbenth	Not prec	Prec	FALSE	TRUE			WPP domain-interacting tail-anchored protein 2 (AHRD V1 ***- WIT2_ARATH)
Solyc03g117600.2.1	1	3	FM	Can and Nbenth	Not prec	Prec	FALSE	FALSE			Hydroxycinnamoyl-CoA shikimate/quinate hydroxycinnamoyltransferase (AHRD V1 **-* A4ZKI0_COFAR); contains Interpro domain(s) IPR003480 Transferase
Solyc02g081830.2.1	1	3	FM	Can and Nbenth	Prec	Not prec	FALSE	TRUE			HAD-superfamily hydrolase (AHRD V1 ***- D5A3P4_SPIPL); contains Interpro domain(s) IPR011949 HAD-superfamily hydrolase, subfamily IA, REG-2-like
Solyc07g055210.2.1	1	3	FM	Can and Nbenth	Prec	Not prec	FALSE	TRUE			Aspartate aminotransferase (AHRD V1 ***- B9SW33_RICCO); contains Interpro domain(s) IPR000796 Aspartate/other aminotransferase
Solyc09g098290.2.1	1	3	FM	Can and Nbenth	Prec	Not prec	FALSE	TRUE			Receptor like kinase, RLK
Solyc04g076960.2.1	1	3	FM	Can and Nbenth	Prec	Not prec	FALSE	FALSE			Sucrose transporter (AHRD V1 **** Q9FVJ6_SOLLC); contains Interpro domain(s) IPR005989 Sucrose/H+ symporter, plant
Solyc04g015560.2.1	1	3	FM	Can and Nbenth	Prec	Not prec	FALSE	FALSE			Beta-D-glucosidase (AHRD V1 ***- Q7XAS3_GOSHI); contains Interpro domain(s) IPR001764 Glycoside hydrolase, family 3, N-terminal
Solyc04g009810.2.1	1	3	FM	Can and Nbenth	Prec	Not prec	FALSE	TRUE			Pelota homolog (AHRD V1 ***- C3KIY5_ANOFI); contains Interpro domain(s) IPR004405 Probable translation factor pelota
Solyc02g080220.2.1	1	3	FM	Can and Nbenth	Prec	Not prec	FALSE	TRUE			Pectinesterase (AHRD V1 ***- B9RXQ4_RICCO); contains Interpro domain(s) IPR000070 Pectinesterase, catalytic
Solyc03g117300.2.1	1	3	FM	Can and Nbenth	Prec	Not prec	FALSE	FALSE			Nodulin-like protein (AHRD V1 ***- Q8H6R3_PONTR); contains Interpro domain(s) IPR010658 Nodulin-like
Solyc12g005020.1.1	1	3	FM	Can and Nbenth	Prec	Not prec	FALSE	TRUE			Ring H2 finger protein (AHRD V1 *-*- D9ZHD8_HYPPE); contains Interpro domain(s) IPR018957 Zinc finger, C3HC4 RING-type
Solyc11g010950.1.1	1	3	FM	Can and Nbenth	Prec	Not prec	FALSE	TRUE			Elongator complex protein 4 (AHRD V1 ***- ELP4_BOVIN); contains Interpro domain(s) IPR008728 Elongator complex protein 4
Solyc04g058180.2.1	1	3	FM	Can and Nbenth	Prec	Not prec	FALSE	TRUE			Dehydration-responsive family protein (AHRD V1 **-- D7LDR4_ARALY); contains Interpro domain(s) IPR004159 Protein of unknown function DUF248, methyltransferase putative
Solyc03g119530.2.1	1	3	FM	Can and Nbenth	Prec	Not prec	FALSE	FALSE	LBD		LOB domain protein 42 (AHRD V1 ***- D7KWD0_ARALY); contains Interpro domain(s) IPR004883 Lateral organ boundaries, LOB
Solyc02g090730.2.1	1	3	FM	Can and Nbenth	Prec	Not prec	FALSE	FALSE			Cell number regulator 1 (AHRD V1 **-- B6TZ45_MAIZE); contains Interpro domain(s) IPR006461 Protein of unknown function Cys-rich
Solyc11g012130.1.1	1	3	FM	Can and Nbenth	Prec	Not prec	FALSE	FALSE			Blue copper protein (AHRD V1 *--- B6U7P6_MAIZE); contains Interpro domain(s) IPR008972 Cupredoxin
Solyc04g049920.2.1	1	3	FM	Can and Nbenth	Prec	Not prec	FALSE	TRUE			RNA binding protein-like (AHRD V1 **-- Q8LFQ5_ARATH); contains Interpro domain(s) IPR000504 RNA recognition motif, RNP-1
Solyc07g062810.2.1	1	3	FM	Can and Nbenth	Prec	Not prec	FALSE	TRUE			Branched-chain amino acid aminotransferase-like (AHRD V1 **** Q5NAM3_ORYSJ); contains Interpro domain(s) IPR001544 Aminotransferase, class IV
Solyc06g065630.2.1	1	3	FM	Can and Nbenth	Prec	Not prec	FALSE	TRUE			Monooxygenase (AHRD V1 **** B5GNT3_STRCL); contains Interpro domain(s) IPR000103 Pyridine nucleotide-disulphide oxidoreductase, class-II
Solyc12g007160.1.1	1	3	FM	Can and Nbenth	Prec	Prec	TRUE	TRUE			Protein ABIL1 (AHRD V1 *--- B6TCZ2_MAIZE)
Solyc07g066230.2.1	1	3	FM	Can and Nbenth	Prec	Prec	TRUE	TRUE			Receptor like kinase, RLK
Solyc00g050430.2.1	1	3	FM	Can and Nbenth	Prec	Prec	TRUE	TRUE	bHLH		BHLH transcription factor (AHRD V1 *-*- A9YWR2_MEDTR); contains Interpro domain(s) IPR011598 Helix-loop-helix DNA-binding
Solyc02g083250.2.1	1	3	FM	Can and Nbenth	Prec	Prec	TRUE	FALSE			Cellular retinaldehyde-binding/triple function C-terminal (AHRD V1 **-- B6SN40_MAIZE); contains Interpro domain(s) IPR001251 Cellular retinaldehyde-binding/triple function, C-terminal
Solyc02g081670.1.1	1	3	FM	Can and Nbenth	Prec	Prec	TRUE	TRUE			Fimbriata (Fragment) (AHRD V1 **-- Q6QVW9_MIMLE); contains Interpro domain(s) IPR001810 Cyclin-like F-box
Solyc03g121060.2.1	1	3	FM	Can and Nbenth	Prec	Prec	TRUE	TRUE		GO:0003700	Auxin response factor 9 (AHRD V1 *-** ARFI_ARATH); contains Interpro domain(s) IPR003311 AUX/IAA protein
Solyc05g005810.2.1	1	3	FM	Can and Nbenth	Prec	Prec	TRUE	FALSE			Uncharacterized basic helix-loop-helix protein At1g06150 (AHRD V1 *-*- Y1615_ARATH)
Solyc05g015750.2.1	1	3	FM	Can and Nbenth	Prec	Prec	TRUE	FALSE	MIKC	GO:0003700	Transcription factor MADS-box 2 (AHRD V1 **** D5HSY6_9ROSA); contains Interpro domain(s) IPR002100 Transcription factor, MADS-box IPR002487 Transcription factor, K-box
Solyc06g073190.2.1	1	3	FM	Can and Nbenth	Prec	Prec	TRUE	TRUE			Fructokinase-like (AHRD V1 **-* Q307Z3_SOLTU); contains Interpro domain(s) IPR002173 Carbohydrate/puine kinase, PfkB, conserved site
Solyc02g090220.2.1	1	3	FM	Can and Nbenth	Prec	Prec	TRUE	FALSE	Dof	GO:0003700	Dof zinc finger protein (AHRD V1 *-*- Q9SXG5_ORYSA); contains Interpro domain(s) IPR003851 Zinc finger, Dof-type
Solyc05g049980.2.1	1	3	FM	Can and Nbenth	Prec	Prec	TRUE	FALSE			Glycoside hydrolase family 28 protein/polygalacturonase family protein (AHRD V1 **-- Q1PF10_ARATH); contains Interpro domain(s) IPR012334 Pectin lyase fold
Solyc12g009300.1.1	1	3	FM	Can and Nbenth	Prec	Prec	TRUE	FALSE			Sucrose synthase (AHRD V1 **** O82693_SOLLC); contains Interpro domain(s) IPR012820 Sucrose synthase, plants and cyanobacteria IPR000368 Sucrose synthase
Solyc09g008830.2.1	1	3	FM	Can and Nbenth	Prec	Prec	TRUE	FALSE			Os01g0318400 protein (Fragment) (AHRD V1 *-*- Q7XXQ7_ORYSJ)
Solyc02g068070.2.1	1	3	FM	Can and Nbenth	Prec	Prec	TRUE	TRUE			Lipase (AHRD V1 **** Q1XBG1_RICCO); contains Interpro domain(s) IPR006693 AB-hydrolase associated lipase region
Solyc11g012450.1.1	1	3	FM	Can and Nbenth	Prec	Prec	TRUE	FALSE			Predicted transporter (AHRD V1 ***- Q2TZC8_ASPOR); contains Interpro domain(s) IPR003663 Sugar/inositol transporter
Solyc03g064030.2.1	1	3	FM	Can and Nbenth	Prec	Prec	TRUE	FALSE			C4orf29 homolog (AHRD V1 **-- B5X1A7_SALSA); contains Interpro domain(s) IPR019149 Protein of unknown function DUF2048
Solyc05g055880.2.1	1	3	FM	Can and Nbenth	Prec	Prec	TRUE	TRUE			Nucleolar protein 5 (AHRD V1 ***- Q6P364_XENTR); contains Interpro domain(s) IPR002687 Pre-mRNA processing ribonucleoprotein, binding region
Solyc09g007260.2.1	1	3	FM	Can and Nbenth	Prec	Prec	TRUE	TRUE	AP2	GO:0003677	AP2-like ethylene-responsive transcription factor At1g79700 (AHRD V1 *--- AP2L3_ARATH); contains Interpro domain(s) IPR001471 Pathogenesis-related transcriptional factor and ERF, DNA-binding
Solyc03g111310.2.1	1	3	FM	Can and Nbenth	Prec	Prec	TRUE	FALSE			AKIN gamma (AHRD V1 **-- Q7XYY0_MEDTR); contains Interpro domain(s) IPR000644 Cystathionine beta-synthase, core
Solyc01g100370.2.1	1	3	FM	Can and Nbenth	Prec	Prec	TRUE	TRUE			Universal stress protein (AHRD V1 ***- B6SNQ1_MAIZE); contains Interpro domain(s) IPR006016 UspA
Solyc09g075210.2.1	1	3	FM	Can and Nbenth	Prec	Prec	TRUE	FALSE			Late embryogenesis abundant protein 5 (AHRD V1 ***- Q1HGG0_9ROSI); contains Interpro domain(s) IPR004926 Late embryogenesis abundant protein 3
Solyc07g053220.1.1	1	3	FM	Can and Nbenth	Prec	Prec	TRUE	FALSE			Receptor-like protein kinase (AHRD V1 ***- Q9LLN5_ORYSA); contains Interpro domain(s) IPR002290 Serine/threonine protein kinase
Solyc07g006380.2.1	1	3	FM	Can and Nbenth	Prec	Prec	TRUE	FALSE			Defensin-like protein (AHRD V1 ***- Q948T3_PYRPY); contains Interpro domain(s) IPR008177 Gamma Purothionin
Solyc11g073110.1.1	1	3	FM	Can and Nbenth	Prec	Prec	TRUE	FALSE			Auxin-regulated protein (AHRD V1 ***- Q945F5_SOLLC); contains Interpro domain(s) IPR010369 Protein of unknown function DUF966
Solyc10g080880.1.1	1	3	FM	Can and Nbenth	Prec	Prec	TRUE	TRUE			Auxin efflux carrier (AHRD V1 ***- D6RT09_SOLLC); contains Interpro domain(s) IPR014024 Auxin efflux carrier, subgroup
Solyc03g114840.2.1	1	3	FM	Can and Nbenth	Prec	Prec	TRUE	TRUE	MIKC	GO:0003700	MADS box transcription factor 11 (AHRD V1 **** D9IFM5_ONCHC); contains Interpro domain(s) IPR002100 Transcription factor, MADS-box IPR002487 Transcription factor, K-box
Solyc12g006530.1.1	1	3	FM	Can and Nbenth	Prec	Prec	TRUE	FALSE			Cycloartenol synthase (AHRD V1 ***- D7LA92_ARALY); contains Interpro domain(s) IPR018333 Squalene cyclase
Solyc03g115870.2.1	1	3	FM	Can and Nbenth	Prec	Prec	TRUE	TRUE			Thioredoxin 2 (AHRD V1 ***- Q5ZF47_PLAMJ); contains Interpro domain(s) IPR015467 Thioredoxin, core
Solyc08g081480.2.1	1	3	FM	Can and Nbenth	Prec	Prec	TRUE	TRUE			Polygalacturonase-like protein (AHRD V1 **-- Q84LI7_FRAAN); contains Interpro domain(s) IPR012334 Pectin lyase fold
Solyc02g080230.2.1	1	3	FM	Can and Nbenth	Prec	Prec	TRUE	FALSE			Rop-interactive crib motif-containing protein 1 (AHRD V1 *--- D7LGA6_ARALY); contains Interpro domain(s) IPR000095 PAK-box/P21-Rho-binding
Solyc02g094400.2.1	1	3	FM	Can and Nbenth	Prec	Prec	TRUE	TRUE			Glycerophosphodiester phosphodiesterase gde1 (AHRD V1 ***- B6JW52_SCHJY); contains Interpro domain(s) IPR004129 Glycerophosphoryl diester phosphodiesterase
Solyc01g104950.2.1	1	3	FM	Can and Nbenth	Prec	Prec	TRUE	TRUE			Alpha-L-arabinofuranosidase/beta-D-xylosidase (AHRD V1 **** D9D7L0_MALDO); contains Interpro domain(s) IPR001764 Glycoside hydrolase, family 3, N-terminal
Solyc04g077830.2.1	1	3	FM	Can and Nbenth	Prec	Prec	TRUE	TRUE			Calmodulin-binding protein (AHRD V1 **-* Q7XJB9_ORYSI); contains Interpro domain(s) IPR011990 Tetratricopeptide-like helical
Solyc03g121790.2.1	1	3	FM	Nbenth	Not prec	Not prec	FALSE	TRUE			EPIDERMAL PATTERNING FACTOR-like protein 3 (AHRD V1 ***- EPFL3_ARATH)
Solyc10g012210.1.1	1	3	FM	Nbenth	Not prec	Not prec	FALSE	TRUE			ARID/BRIGHT DNA-binding domain-containing protein/ELM2 domain-containing protein/Myb-like DNA-binding domain-containing protein (AHRD V1 *--- Q1PEA0_ARATH); contains Interpro domain(s) IPR000949 ELM2
Solyc03g095780.1.1	1	3	FM	Nbenth	Not prec	Not prec	FALSE	TRUE			Abscisic acid receptor PYL6 (AHRD V1 **-* PYL6_ARATH); contains Interpro domain(s) IPR019587 Polyketide cyclase/dehydrase
Solyc10g038080.1.1	1	3	FM	Nbenth	Not prec	Not prec	FALSE	TRUE			Shikimate dehydrogenase (AHRD V1 ***- B6TSW1_MAIZE); contains Interpro domain(s) IPR001381 Dehydroquinase class I
Solyc02g038740.2.1	1	3	FM	Nbenth	Not prec	Not prec	FALSE	TRUE			3-hydroxy-3-methylglutaryl coenzyme A reductase (AHRD V1 **** Q9FS01_SOLTU); contains Interpro domain(s) IPR004554 Hydroxymethylglutaryl-CoA reductase, class I, catalytic
Solyc11g073130.1.1	1	3	FM	Nbenth	Not prec	Not prec	FALSE	FALSE			Protein tyrosine phosphatase 1B (AHRD V1 *-*- D9IVF2_STRIE); contains Interpro domain(s) IPR007482 Protein-tyrosine phosphatase-like, PTPLA
Solyc06g075360.2.1	1	3	FM	Nbenth	Not prec	Not prec	FALSE	FALSE			Senescence-associated protein (AHRD V1 ***- B6T9C5_MAIZE); contains Interpro domain(s) IPR000301 Tetraspanin, subgroup
Solyc04g076820.1.1	1	3	FM	Nbenth	Not prec	Not prec	FALSE	FALSE			Octicosapeptide/Phox/Bem1p domain-containing protein (AHRD V1 *--- D7MPG4_ARALY); contains Interpro domain(s) IPR000270 Octicosapeptide/Phox/Bem1p
Solyc02g080510.1.1	1	3	FM	Nbenth	Not prec	Not prec	FALSE	FALSE			Arabidopsis thaliana genomic DNA chromosome 5 P1 clone MOK16 (AHRD V1 *-*- Q9LYW2_ARATH); contains Interpro domain(s) IPR007608 Protein of unknown function DUF584
Solyc09g005110.2.1	1	3	FM	Nbenth	Not prec	Not prec	FALSE	TRUE			Pyruvate decarboxylase 1 (AHRD V1 **** Q84V95_LOTCO); contains Interpro domain(s) IPR012110 Pyruvate decarboxylase/indolepyruvate decarboxylase
Solyc10g052470.1.1	1	3	FM	Nbenth	Not prec	Not prec	FALSE	TRUE	MYB_related	GO:0003700	Myb family transcription factor (Fragment) (AHRD V1 **** D7KSM0_ARALY); contains Interpro domain(s) IPR017884 SANT, eukarya
Solyc02g093890.1.1	1	3	FM	Nbenth	Not prec	Not prec	FALSE	FALSE			Unknown Protein (AHRD V1)
Solyc03g113060.2.1	1	3	FM	Nbenth	Not prec	Not prec	FALSE	TRUE			ATP-binding cassette transporter (AHRD V1 ***- D8RFW2_SELML); contains Interpro domain(s) IPR003439 ABC transporter-like
Solyc08g036570.1.1	1	3	FM	Nbenth	Not prec	Not prec	FALSE	TRUE			Glutaredoxin (AHRD V1 **** B9GF65_POPTR); contains Interpro domain(s) IPR011905 Glutaredoxin-like, plant II
Solyc10g008400.1.1	1	3	FM	Nbenth	Not prec	Not prec	FALSE	FALSE			RING finger protein 5 (AHRD V1 *--- B6TI40_MAIZE); contains Interpro domain(s) IPR018957 Zinc finger, C3HC4 RING-type
Solyc03g060510.2.1	1	3	FM	Nbenth	Not prec	Not prec	FALSE	FALSE			Membrane protein (AHRD V1 **-- D0BK36_9LACT); contains Interpro domain(s) IPR008537 Protein of unknown function DUF819
Solyc01g010250.2.1	1	3	FM	Nbenth	Not prec	Not prec	FALSE	FALSE			6-phosphogluconolactonase (AHRD V1 ***- B6U0H2_MAIZE); contains Interpro domain(s) IPR005900 6-phosphogluconolactonase
Solyc12g009880.1.1	1	3	FM	Nbenth	Not prec	Not prec	FALSE	FALSE			Serine-rich protein (AHRD V1 ***- Q8L8M8_ARATH)
Solyc12g094440.1.1	1	3	FM	Nbenth	Not prec	Not prec	FALSE	TRUE			High mobility group family (Fragment) (AHRD V1 **-- B9GFX2_POPTR); contains Interpro domain(s) IPR001606 AT-rich interaction region
Solyc07g032740.2.1	1	3	FM	Nbenth	Not prec	Not prec	FALSE	TRUE			Aspartate aminotransferase (AHRD V1 **** A9PHH1_POPTR); contains Interpro domain(s) IPR000796 Aspartate/other aminotransferase
Solyc06g075150.2.1	1	3	FM	Nbenth	Not prec	Not prec	FALSE	FALSE	ARF		Auxin response factor 16 (AHRD V1 ***- D9IVB4_SOLLC); contains Interpro domain(s) IPR010525 Auxin response factor
Solyc02g089290.2.1	1	3	FM	Nbenth	Not prec	Not prec	FALSE	TRUE			ATP binding / kinase/ protein serine / threonine kinase (AHRD V1 **** C5DB47_VITVI); contains Interpro domain(s) IPR002290 Serine/threonine protein kinase
Solyc04g025510.2.1	1	3	FM	Nbenth	Not prec	Not prec	FALSE	FALSE			Os02g0194300 protein (Fragment) (AHRD V1 *-*- Q0E347_ORYSJ); contains Interpro domain(s) IPR014854 Nse4
Solyc03g097940.2.1	1	3	FM	Nbenth	Not prec	Not prec	FALSE	FALSE			Potassium channel (AHRD V1 **** O04242_MAIZE); contains Interpro domain(s) IPR002110 Ankyrin
Solyc04g014260.1.1	1	3	FM	Nbenth	Not prec	Not prec	FALSE	FALSE	ZF-HD	GO:0003700	Zinc finger-homeodomain protein 1 (Fragment) (AHRD V1 **-- B0LK17_YUCFI); contains Interpro domain(s) IPR006456 ZF-HD homeobox protein Cys/His-rich dimerisation region
Solyc07g017610.2.1	1	3	FM	Nbenth	Not prec	Not prec	FALSE	FALSE			Saccharopine dehydrogenase (NAD(+) L-glutamate-forming) (AHRD V1 *-** C7PUW7_CHIPD); contains Interpro domain(s) IPR005097 Saccharopine dehydrogenase
Solyc10g085740.1.1	1	3	FM	Nbenth	Not prec	Not prec	FALSE	FALSE			GDSL esterase/lipase At5g03820 (AHRD V1 ***- GDL73_ARATH); contains Interpro domain(s) IPR001087 Lipase, GDSL
Solyc02g084680.2.1	1	3	FM	Nbenth	Not prec	Not prec	FALSE	TRUE	SRS	GO:0003700	Short internodes 2 (AHRD V1 **-- B9MXK1_POPTR); contains Interpro domain(s) IPR007818 Protein of unknown function DUF702
Solyc01g104880.2.1	1	3	FM	Nbenth	Not prec	Not prec	FALSE	TRUE			Phosphatidylserine decarboxylase proenzyme 2 (AHRD V1 **** D3AWK7_POLPA); contains Interpro domain(s) IPR005221 Phosphatidylserine decarboxylase
Solyc04g082420.2.1	1	3	FM	Nbenth	Not prec	Not prec	FALSE	FALSE			BTB/POZ domain-containing protein (AHRD V1 **-- D7LC69_ARALY); contains Interpro domain(s) IPR013089 Kelch related
Solyc03g095310.2.1	1	3	FM	Nbenth	Not prec	Not prec	FALSE	TRUE			Cytochrome P450
Solyc05g007240.1.1	1	3	FM	Nbenth	Not prec	Not prec	FALSE	FALSE			TO109-12 (Fragment) (AHRD V1 *-*- Q3LVG1_TAROF)
Solyc12g013690.1.1	1	3	FM	Nbenth	Not prec	Not prec	FALSE	FALSE			Monooxygenase FAD-binding protein (AHRD V1 **-- Q1B616_MYCSS); contains Interpro domain(s) IPR003042 Aromatic-ring hydroxylase-like
Solyc02g065340.1.1	1	3	FM	Nbenth	Not prec	Not prec	FALSE	FALSE	B3	GO:0006355	B3 domain-containing protein REM14 (AHRD V1 ***- REM14_ARATH); contains Interpro domain(s) IPR003340 Transcriptional factor B3
Solyc03g113710.2.1	1	3	FM	Nbenth	Not prec	Not prec	FALSE	TRUE			Formin 3 (AHRD V1 *-*- D0QAN4_ARATH); contains Interpro domain(s) IPR015425 Actin-binding FH2
Solyc12g006450.1.1	1	3	FM	Nbenth	Not prec	Not prec	FALSE	TRUE			Aminotransferase-like protein (AHRD V1 ***- Q9LIE2_ARATH); contains Interpro domain(s) IPR005814 Aminotransferase class-III
Solyc08g081740.2.1	1	3	FM	Nbenth	Not prec	Not prec	FALSE	FALSE			Katanin p60 ATPase-containing subunit (AHRD V1 *--* KTNA1_ARATH); contains Interpro domain(s) IPR003959 ATPase, AAA-type, core
Solyc01g093960.2.1	1	3	FM	Nbenth	Prec	Not prec	FALSE	TRUE	MIKC		MADS box transcription factor (AHRD V1 ***- Q2NNC0_ELAGV); contains Interpro domain(s) IPR002487 Transcription factor, K-box
Solyc02g077880.2.1	1	3	FM	Nbenth	Prec	Not prec	FALSE	FALSE			Auxin-repressed protein (AHRD V1 ***- Q6PXE1_9SOLN); contains Interpro domain(s) IPR008406 Dormancyauxin associated
Solyc04g082410.2.1	1	3	FM	Nbenth	Prec	Not prec	FALSE	TRUE			BTB/POZ domain-containing protein (AHRD V1 **-- D7LC69_ARALY); contains Interpro domain(s) IPR013089 Kelch related
Solyc03g098710.1.1	1	3	FM	Nbenth	Prec	Not prec	FALSE	FALSE			Kunitz-type proteinase inhibitor A4 (Fragment) (AHRD V1 **** C5IWR3_SOLBR); contains Interpro domain(s) IPR011065 Kunitz inhibitor ST1-like
Solyc01g079880.2.1	1	3	FM	Nbenth	Prec	Not prec	FALSE	TRUE			Asparagine synthetase (AHRD V1 *--- Q9ZST6_ARATH)
Solyc10g051390.1.1	1	3	FM	Nbenth	Prec	Not prec	FALSE	FALSE			RNA-binding glycine-rich protein-1b (AHRD V1 **** Q40427_NICSY); contains Interpro domain(s) IPR015465 RNA recognition motif, glycine rich protein
Solyc07g014730.2.1	1	3	FM	Nbenth	Prec	Not prec	FALSE	TRUE			Phospholipase A2 (AHRD V1 **** Q5CCT8_TOBAC); contains Interpro domain(s) IPR016090 Phospholipase A2
Solyc02g093910.2.1	1	3	FM	Nbenth	Prec	Not prec	FALSE	TRUE			Kelch repeat-containing protein-like (AHRD V1 ***- Q6ZK44_ORYSJ); contains Interpro domain(s) IPR015915 Kelch-type beta propeller
Solyc07g038160.2.1	1	3	FM	Nbenth	Prec	Not prec	FALSE	TRUE	GATA	GO:0006355	GATA transcription factor 20 (AHRD V1 *-*- B6SS40_MAIZE); contains Interpro domain(s) IPR000679 Zinc finger, GATA-type
Solyc04g064620.2.1	1	3	FM	Nbenth	Prec	Not prec	FALSE	TRUE			RAG1-activating protein 1 homolog (AHRD V1 **-- R1AP1_DROPS); contains Interpro domain(s) IPR018179 RAG1-activating protein 1 homologue
Solyc08g080570.2.1	1	3	FM	Nbenth	Prec	Not prec	FALSE	FALSE			UDP-glucose 4-epimerase (AHRD V1 **** B0M3E8_PEA); contains Interpro domain(s) IPR005886 UDP-glucose 4-epimerase
Solyc04g074770.2.1	1	3	FM	Nbenth	Prec	Not prec	FALSE	FALSE			Unknown Protein (AHRD V1)
Solyc11g071290.1.1	1	3	FM	Nbenth	Prec	Not prec	FALSE	TRUE			Alcohol dehydrogenase (AHRD V1 **** Q43169_SOLTU); contains Interpro domain(s) IPR002085 Alcohol dehydrogenase superfamily, zinc-containing
Solyc06g060110.2.1	1	3	FM	Nbenth	Prec	Not prec	FALSE	TRUE			Amino acid permease (AHRD V1 **** B9GU10_POPTR); contains Interpro domain(s) IPR013057 Amino acid transporter, transmembrane
Solyc02g082420.2.1	1	3	FM	Nbenth	Prec	Not prec	FALSE	FALSE			Ring finger protein (AHRD V1 *-*- O49869_HORVU); contains Interpro domain(s) IPR018957 Zinc finger, C3HC4 RING-type
Solyc12g038510.1.1	1	3	FM	Nbenth	Prec	Not prec	FALSE	TRUE	MIKC		MADS box transcription factor 11 (AHRD V1 ***- D9IFM5_ONCHC); contains Interpro domain(s) IPR002487 Transcription factor, K-box
Solyc03g098780.1.1	1	3	FM	Nbenth	Prec	Not prec	FALSE	FALSE			Kunitz-type protease inhibitor (AHRD V1 **** Q3S488_SOLTU); contains Interpro domain(s) IPR002160 Proteinase inhibitor I3, Kunitz legume
Solyc01g066720.2.1	1	3	FM	Nbenth	Prec	Not prec	FALSE	TRUE			Hypoxia induced protein conserved region containing protein (AHRD V1 ***- B6UCX6_MAIZE); contains Interpro domain(s) IPR007667 Hypoxia induced protein conserved region
Solyc06g076270.2.1	1	3	FM	Nbenth	Prec	Not prec	FALSE	FALSE	MYB_related	GO:0003677	Telomere repeat-binding protein 5 (AHRD V1 *-*- TRP5_ARATH); contains Interpro domain(s) IPR001005 SANT, DNA-binding
Solyc05g041200.2.1	1	3	FM	Nbenth	Prec	Not prec	FALSE	FALSE			4-hydroxyphenylpyruvate dioxygenase (AHRD V1 **** B7X935_HEVBR); contains Interpro domain(s) IPR005956 4-hydroxyphenylpyruvate dioxygenase
Solyc11g071460.1.1	1	3	FM	Nbenth	Prec	Not prec	FALSE	TRUE			Dehydrogenase/reductase SDR family member 13 (AHRD V1 **-- DHR13_BOVIN); contains Interpro domain(s) IPR002347 Glucose/ribitol dehydrogenase
Solyc02g031710.2.1	1	3	FM	Nbenth	Prec	Not prec	FALSE	TRUE			Protein binding protein (AHRD V1 **-- D7L0L7_ARALY); contains Interpro domain(s) IPR001841 Zinc finger, RING-type
Solyc10g047030.1.1	1	3	FM	Nbenth	Prec	Not prec	FALSE	TRUE			Beta-xylosidase 4 (AHRD V1 **** D7MRV5_ARALY); contains Interpro domain(s) IPR001764 Glycoside hydrolase, family 3, N-terminal
Solyc08g078940.1.1	1	3	FM	Nbenth	Prec	Not prec	FALSE	TRUE			Cortical cell-delineating protein (AHRD V1 **-- B6U436_MAIZE); contains Interpro domain(s) IPR013770 Plant lipid transfer protein and hydrophobic protein, helical
Solyc03g034400.2.1	1	3	FM	Nbenth	Prec	Not prec	FALSE	FALSE			Multidrug resistance protein mdtK (AHRD V1 ***- MDTK_EDWI9); contains Interpro domain(s) IPR015521 MATE family transporter related protein
Solyc06g071380.2.1	1	3	FM	Nbenth	Prec	Not prec	FALSE	FALSE			Unknown Protein (AHRD V1)
Solyc01g006390.2.1	1	3	FM	Nbenth	Prec	Not prec	FALSE	FALSE			Cysteine-rich extensin-like protein-4 (AHRD V1 *-*- Q08197_TOBAC)
Solyc04g010330.2.1	1	3	TM	Can	Not prec	Not prec	FALSE	TRUE			Auxin-regulated protein (AHRD V1 *-*- Q945F5_SOLLC); contains Interpro domain(s) IPR010369 Protein of unknown function DUF966
Solyc03g097920.1.1	1	3	TM	Can	Not prec	Not prec	FALSE	FALSE			Mitogen-activated protein kinase kinase (AHRD V1 **** D7NPU9_CAPAN); contains Interpro domain(s) IPR002290 Serine/threonine protein kinase
Solyc07g056360.1.1	1	3	TM	Can	Not prec	Not prec	FALSE	TRUE			Unknown Protein (AHRD V1)
Solyc06g071650.1.1	1	3	TM	Can	Not prec	Not prec	FALSE	TRUE			AP-1 complex subunit mu (AHRD V1 ***- Q7RVT3_NEUCR); contains Interpro domain(s) IPR001392 Clathrin adaptor, mu subunit
Solyc04g007790.2.1	1	3	TM	Can	Not prec	Not prec	FALSE	FALSE			Major latex-like protein (AHRD V1 **-- B5THI3_PANGI); contains Interpro domain(s) IPR000916 Bet v I allergen
Solyc09g097930.2.1	1	3	TM	Can	Not prec	Not prec	FALSE	TRUE			MazG nucleotide pyrophosphohydrolase (AHRD V1 ***- B1J275_PSEPW); contains Interpro domain(s) IPR004518 NTP pyrophosphohydrolase MazG, putative catalytic core
Solyc08g007690.1.1	1	3	TM	Can	Not prec	Not prec	FALSE	FALSE			Subtilisin-like protease (AHRD V1 **-- Q9LWA3_SOLLC); contains Interpro domain(s) IPR015500 Peptidase S8, subtilisin-related
Solyc12g009220.1.1	1	3	TM	Can	Not prec	Not prec	FALSE	FALSE			Jasmonate ZIM-domain protein 1 (AHRD V1 **-- A7XXZ0_SOLLC); contains Interpro domain(s) IPR010399 Tify
Solyc07g053290.2.1	1	3	TM	Can	Not prec	Not prec	FALSE	TRUE	bHLH	GO:0003700	BHLH transcription factor (AHRD V1 *--* B4FMK3_MAIZE); contains Interpro domain(s) IPR001092 Basic helix-loop-helix dimerisation region bHLH
Solyc01g067540.1.1	1	3	TM	Can	Not prec	Not prec	FALSE	TRUE	ERF	GO:0003677_GO:0006355	Ethylene responsive transcription factor 12 (AHRD V1 *-*- C0J9I3_9ROSA); contains Interpro domain(s) IPR001471 Pathogenesis-related transcriptional factor and ERF, DNA-binding
Solyc01g095630.2.1	1	3	TM	Can	Not prec	Not prec	FALSE	TRUE	WRKY		WRKY transcription factor (AHRD V1 ***- D3YEX5_SOLLC); contains Interpro domain(s) IPR003657 DNA-binding WRKY
Solyc05g006430.1.1	1	3	TM	Can	Not prec	Not prec	FALSE	TRUE			Formin 3 (AHRD V1 *-*- D0QAN4_ARATH); contains Interpro domain(s) IPR015425 Actin-binding FH2
Solyc07g063820.2.1	1	3	TM	Can	Not prec	Not prec	FALSE	FALSE			Serine/threonine-protein kinase receptor (AHRD V1 **** B6U2B7_MAIZE); contains Interpro domain(s) IPR002290 Serine/threonine protein kinase
Solyc04g076480.2.1	1	3	TM	Can	Not prec	Not prec	FALSE	TRUE			Serine/threonine-protein kinase B-raf (AHRD V1 *-** BRAF_COTJA); contains Interpro domain(s) IPR002290 Serine/threonine protein kinase
Solyc01g006660.1.1	1	3	TM	Can	Not prec	Not prec	FALSE	TRUE			Subtilisin-like serine protease (AHRD V1 **-* Q8LAE1_ARATH); contains Interpro domain(s) IPR015500 Peptidase S8, subtilisin-related
Solyc07g014670.2.1	1	3	TM	Can	Not prec	Not prec	FALSE	FALSE			Cytochrome P450
Solyc12g005040.1.1	1	3	TM	Can	Not prec	Not prec	FALSE	TRUE			Calcium-dependent protein kinase (AHRD V1 ***- Q9XER6_SOLTU); contains Interpro domain(s) IPR011992 EF-Hand type
Solyc12g049350.1.1	1	3	TM	Can	Not prec	Not prec	FALSE	TRUE	MYB	GO:0003677	Myb 12 transcription factor (AHRD V1 ***- D2EBC3_9SOLN); contains Interpro domain(s) IPR015495 Myb transcription factor
Solyc03g063550.1.1	1	3	TM	Can	Not prec	Not prec	FALSE	TRUE			Unknown Protein (AHRD V1)
Solyc05g006010.2.1	1	3	TM	Can	Not prec	Not prec	FALSE	TRUE			Peptide transporter (AHRD V1 **-* A6YJX4_9MAGN); contains Interpro domain(s) IPR000109 TGF-beta receptor, type I/II extracellular region
Solyc03g112430.1.1	1	3	TM	Can	Not prec	Not prec	FALSE	TRUE	LBD		LOB domain protein 1 (AHRD V1 ***- B2KKZ3_ORYSJ); contains Interpro domain(s) IPR004883 Lateral organ boundaries, LOB
Solyc10g005060.2.1	1	3	TM	Can	Not prec	Not prec	FALSE	TRUE			O-methyltransferase-like protein (AHRD V1 **** D3JZ18_PRUMU); contains Interpro domain(s) IPR016461 O-methyltransferase, COMT, eukaryota
Solyc10g079600.1.1	1	3	TM	Can	Not prec	Prec	FALSE	TRUE		GO:0006355	Response regulator 6 (AHRD V1 ***- Q9FRY9_MAIZE); contains Interpro domain(s) IPR001789 Signal transduction response regulator, receiver region
Solyc07g022830.2.1	1	3	TM	Can	Not prec	Prec	FALSE	FALSE			Xenotropic and polytropic retrovirus receptor (AHRD V1 **-- B2GU54_XENTR); contains Interpro domain(s) IPR004342 EXS, C-terminal
Solyc05g009770.1.1	1	3	TM	Can	Not prec	Prec	FALSE	TRUE	C2H2	GO:0003700	Zinc finger family protein (AHRD V1 ***- D7KQE1_ARALY); contains Interpro domain(s) IPR007087 Zinc finger, C2H2-type
Solyc04g080740.1.1	1	3	TM	Can	Not prec	Prec	FALSE	TRUE	bZIP		BZIP transcription factor family protein (AHRD V1 **-- D7KSN7_ARALY); contains Interpro domain(s) IPR011700 Basic leucine zipper
Solyc08g075430.2.1	1	3	TM	Can	Not prec	Prec	FALSE	FALSE			ABC transporter G family member 14 (AHRD V1 ***- AB14G_ARATH); contains Interpro domain(s) IPR013525 ABC-2 type transporter
Solyc09g005880.1.1	1	3	TM	Can	Not prec	Prec	FALSE	TRUE			Unknown Protein (AHRD V1)
Solyc02g092200.2.1	1	3	TM	Can	Not prec	Prec	FALSE	TRUE			Genomic DNA chromosome 5 TAC clone K9I9 (AHRD V1 *-*- Q9FJV9_ARATH)
Solyc02g089690.2.1	1	3	TM	Can	Not prec	Prec	FALSE	TRUE			Leaf senescence protein-like (AHRD V1 ***- Q8RV74_ORYSJ); contains Interpro domain(s) IPR004253 Protein of unknown function DUF231, plant
Solyc02g089210.2.1	1	3	TM	Can and Nbenth	Not prec	Not prec	FALSE	TRUE	MIKC		MADS box transcription factor (AHRD V1 ***- Q689E7_GENTR); contains Interpro domain(s) IPR002487 Transcription factor, K-box
Solyc12g049540.1.1	1	3	TM	Can and Nbenth	Not prec	Not prec	FALSE	TRUE			Polyphosphoinositide phosphatase (AHRD V1 ***- C0S4L1_PARBP); contains Interpro domain(s) IPR002013 Synaptojanin, N-terminal
Solyc02g089160.2.1	1	3	TM	Can and Nbenth	Not prec	Not prec	FALSE	TRUE			Cytochrome P450
Solyc10g078370.1.1	1	3	TM	Can and Nbenth	Not prec	Not prec	FALSE	TRUE			Auxin efflux carrier (AHRD V1 ***- D6RT09_SOLLC); contains Interpro domain(s) IPR014024 Auxin efflux carrier, subgroup
Solyc03g112580.2.1	1	3	TM	Can and Nbenth	Not prec	Not prec	FALSE	TRUE			Receptor like kinase, RLK
Solyc02g089620.2.1	1	3	TM	Can and Nbenth	Not prec	Not prec	FALSE	TRUE			Proline dehydrogenase (AHRD V1 **** A1E289_ACTDE); contains Interpro domain(s) IPR015659 Proline oxidase
Solyc01g010150.2.1	1	3	TM	Can and Nbenth	Not prec	Not prec	FALSE	TRUE			Unknown protein DS12 from 2D-PAGE of leaf, chloroplastic (AHRD V1 *--- UP12_ORYSJ); contains Interpro domain(s) IPR002912 Amino acid-binding ACT
Solyc10g075050.1.1	1	3	TM	Can and Nbenth	Not prec	Not prec	FALSE	TRUE			Non-specific lipid-transfer protein (AHRD V1 ***- A7UGG9_SOLTU); contains Interpro domain(s) IPR013770 Plant lipid transfer protein and hydrophobic protein, helical
Solyc07g007750.2.1	1	3	TM	Can and Nbenth	Not prec	Not prec	FALSE	TRUE			Defensin protein (AHRD V1 ***- B1N678_SOLLC); contains Interpro domain(s) IPR008177 Gamma Purothionin
Solyc02g092490.2.1	1	3	TM	Can and Nbenth	Not prec	Not prec	FALSE	TRUE			Acetyltransferase-like protein (AHRD V1 ***- Q7EYF5_ORYSJ); contains Interpro domain(s) IPR000182 GCN5-related N-acetyltransferase
Solyc01g065540.2.1	1	3	TM	Can and Nbenth	Not prec	Not prec	FALSE	TRUE	ARR-B	GO:0003700	Response regulator 8 (AHRD V1 *-*- Q9AV93_MAIZE); contains Interpro domain(s) IPR017053 Response regulator, plant B-type
Solyc02g088820.2.1	1	3	TM	Can and Nbenth	Not prec	Not prec	FALSE	TRUE			Serine carboxypeptidase K10B2.2 (AHRD V1 **** B6TSK4_MAIZE); contains Interpro domain(s) IPR001563 Peptidase S10, serine carboxypeptidase
Solyc01g096410.2.1	1	3	TM	Can and Nbenth	Not prec	Not prec	FALSE	TRUE			Phosphatidylinositol-4-phosphate 5-kinase family protein (AHRD V1 ***- D7L735_ARALY); contains Interpro domain(s) IPR017163 Phosphatidylinositol-4-phosphate 5-kinase, plant
Solyc02g077780.2.1	1	3	TM	Can and Nbenth	Not prec	Not prec	FALSE	TRUE			Necrotic spotted lesions 1 (Fragment) (AHRD V1 *-*- B6ZA38_HELPE); contains Interpro domain(s) IPR001862 Membrane attack complex component/perforin/complement C9
Solyc04g080970.2.1	1	3	TM	Can and Nbenth	Not prec	Not prec	FALSE	TRUE	SRS		Short internode related sequence 5 (AHRD V1 **-- D2KC76_BRARP); contains Interpro domain(s) IPR007818 Protein of unknown function DUF702
Solyc03g113350.2.1	1	3	TM	Can and Nbenth	Not prec	Not prec	FALSE	TRUE			CHY zinc finger containing protein (AHRD V1 *-*- C5P643_COCP7); contains Interpro domain(s) IPR008913 Zinc finger, CHY-type
Solyc02g081230.2.1	1	3	TM	Can and Nbenth	Not prec	Not prec	FALSE	TRUE			Unknown Protein (AHRD V1)
Solyc06g074000.1.1	1	3	TM	Can and Nbenth	Not prec	Prec	FALSE	FALSE			Aspartic proteinase nepenthesin-2 (AHRD V1 **-- B6SJT4_MAIZE); contains Interpro domain(s) IPR001461 Peptidase A1
Solyc04g008450.2.1	1	3	TM	Can and Nbenth	Not prec	Prec	FALSE	FALSE			Potassium transporter 17 (AHRD V1 **** B6T8T1_MAIZE); contains Interpro domain(s) IPR003855 K+ potassium transporter
Solyc03g025800.2.1	1	3	TM	Can and Nbenth	Not prec	Prec	FALSE	TRUE			Os03g0111400 protein (Fragment) (AHRD V1 *-*- Q0DVV0_ORYSJ); contains Interpro domain(s) IPR006121 Heavy metal transport/detoxification protein
Solyc02g063430.2.1	1	3	TM	Can and Nbenth	Not prec	Prec	FALSE	FALSE	bHLH	GO:0003700	BHLH transcription factor (AHRD V1 **** A9YWR2_MEDTR); contains Interpro domain(s) IPR011598 Helix-loop-helix DNA-binding
Solyc03g007240.2.1	1	3	TM	Can and Nbenth	Not prec	Prec	FALSE	FALSE			Spermidine synthase 1 (AHRD V1 **** B6TA19_MAIZE); contains Interpro domain(s) IPR001045 Spermine synthase
Solyc10g080930.1.1	1	3	TM	Can and Nbenth	Not prec	Prec	FALSE	TRUE			Transcription elongation factor A protein 2 (AHRD V1 *--- TCEA2_HUMAN); contains Interpro domain(s) IPR010990 Transcription elongation factor, TFIIS/elongin A/CRSP70, N-terminal
Solyc06g072430.1.1	1	3	TM	Can and Nbenth	Not prec	Prec	FALSE	TRUE			Bcl-2-associated athanogene-like protein (AHRD V1 *-*- D1MIX4_VITVI); contains Interpro domain(s) IPR003103 Apoptosis regulator Bcl-2 protein, BAG
Solyc09g074970.2.1	1	3	TM	Can and Nbenth	Not prec	Prec	FALSE	TRUE			Thiamin pyrophosphokinase 1 (AHRD V1 **** B6SUI9_MAIZE); contains Interpro domain(s) IPR016966 Thiamin pyrophosphokinase, eukaryotic
Solyc03g019950.2.1	1	3	TM	Can and Nbenth	Prec	Not prec	FALSE	TRUE			Genomic DNA chromosome 5 P1 clone MAC12 (AHRD V1 **-- Q9FFX3_ARATH); contains Interpro domain(s) IPR004328 BRO1
Solyc02g072310.2.1	1	3	TM	Can and Nbenth	Prec	Not prec	FALSE	TRUE			Receptor like kinase, RLK
Solyc01g098240.1.1	1	3	TM	Can and Nbenth	Prec	Not prec	FALSE	FALSE			RNA polymerase Rpb1 C-terminal repeat domain-containing protein (AHRD V1 *--- C5GU31_AJEDR); contains Interpro domain(s) IPR012474 Frigida-like
Solyc04g080580.2.1	1	3	TM	Can and Nbenth	Prec	Not prec	FALSE	TRUE			Kinase PfkB family (AHRD V1 **** D4WID3_BACOV); contains Interpro domain(s) IPR011611 Carbohydrate/purine kinase
Solyc10g076790.1.1	1	3	TM	Can and Nbenth	Prec	Not prec	FALSE	TRUE			Auxin transporter-like protein 1 (AHRD V1 **** B6U1Y3_MAIZE); contains Interpro domain(s) IPR013057 Amino acid transporter, transmembrane
Solyc03g026040.2.1	1	3	TM	Can and Nbenth	Prec	Not prec	FALSE	TRUE			Receptor like kinase, RLK
Solyc04g078460.2.1	1	3	TM	Can and Nbenth	Prec	Not prec	FALSE	TRUE			N(4)-(Beta-N-acetylglucosaminyl)-L-asparaginase (AHRD V1 **** ASPG_ELIMR); contains Interpro domain(s) IPR000246 Peptidase T2, asparaginase 2
Solyc05g006550.2.1	1	3	TM	Can and Nbenth	Prec	Not prec	FALSE	TRUE			Microtubule-associated protein TORTIFOLIA1 (AHRD V1 *--- B6SS76_MAIZE); contains Interpro domain(s) IPR011989 Armadillo-like helical
Solyc01g010130.2.1	1	3	TM	Can and Nbenth	Prec	Not prec	FALSE	TRUE	bHLH	GO:0003700	Transcription factor (AHRD V1 *-** D6MKM4_9ASPA); contains Interpro domain(s) IPR011598 Helix-loop-helix DNA-binding
Solyc10g074870.1.1	1	3	TM	Can and Nbenth	Prec	Not prec	FALSE	TRUE			KH domain containing RNA binding signal transduction associated 1 (AHRD V1 *--- Q29RQ2_BOVIN); contains Interpro domain(s) IPR004087 K Homology
Solyc01g098500.2.1	1	3	TM	Can and Nbenth	Prec	Not prec	FALSE	FALSE			Glucose transporter 8 (AHRD V1 ***- Q2KKJ3_SOLIN); contains Interpro domain(s) IPR003663 Sugar/inositol transporter
Solyc09g025280.1.1	1	3	TM	Can and Nbenth	Prec	Not prec	FALSE	FALSE			Light-dependent short hypocotyls 1 (AHRD V1 ***- D7M6V0_ARALY); contains Interpro domain(s) IPR006936 Protein of unknown function DUF640
Solyc09g091060.2.1	1	3	TM	Can and Nbenth	Prec	Not prec	FALSE	TRUE			Unknown Protein (AHRD V1)
Solyc06g062790.2.1	1	3	TM	Can and Nbenth	Prec	Not prec	FALSE	TRUE			Casein kinase I-like (AHRD V1 ***- Q8LR51_ORYSJ); contains Interpro domain(s) IPR002290 Serine/threonine protein kinase
Solyc09g005690.2.1	1	3	TM	Can and Nbenth	Prec	Not prec	FALSE	TRUE			Inositol-1 4 5-trisphosphate 5-Phosphatase-like protein (AHRD V1 ***- Q9M1W5_ARATH); contains Interpro domain(s) IPR000300 Inositol polyphosphate related phosphatase
Solyc06g066340.2.1	1	3	TM	Can and Nbenth	Prec	Not prec	FALSE	TRUE	G2-like		Myb family transcription factor-like protein (AHRD V1 *--- Q84UP8_ORYSJ); contains Interpro domain(s) IPR006447 Myb-like DNA-binding region, SHAQKYF class
Solyc04g015970.2.1	1	3	TM	Can and Nbenth	Prec	Not prec	FALSE	TRUE			ATP-binding cassette 1 (AHRD V1 *-*- Q80ZB2_RAT); contains Interpro domain(s) IPR003439 ABC transporter-like
Solyc02g067040.2.1	1	3	TM	Can and Nbenth	Prec	Not prec	FALSE	TRUE			cDNA clone J075153F01 full insert sequence (AHRD V1 *--- B7F9A7_ORYSJ); contains Interpro domain(s) IPR009769 Protein of unknown function DUF1336
Solyc01g005300.2.1	1	3	TM	Can and Nbenth	Prec	Not prec	FALSE	TRUE			Flavin-binding kelch domain F box protein (AHRD V1 **-* D7KVS5_ARALY); contains Interpro domain(s) IPR015915 Kelch-type beta propeller
Solyc04g078110.1.1	1	3	TM	Can and Nbenth	Prec	Not prec	FALSE	TRUE			Subtilisin-like protease (AHRD V1 **-- A9XG40_TOBAC); contains Interpro domain(s) IPR015500 Peptidase S8, subtilisin-related
Solyc08g077010.1.1	1	3	TM	Can and Nbenth	Prec	Not prec	FALSE	TRUE			AT-hook DNA-binding protein (Fragment) (AHRD V1 *--* A1DR79_CATRO); contains Interpro domain(s) IPR014476 Predicted AT-hook DNA-binding
Solyc04g080820.2.1	1	3	TM	Can and Nbenth	Prec	Not prec	FALSE	TRUE			Cytokinin oxidase/dehydrogenase (AHRD V1 **** C3VPM7_SOLTU); contains Interpro domain(s) IPR015345 Cytokinin dehydrogenase 1, FAD and cytokinin binding
Solyc06g065100.2.1	1	3	TM	Can and Nbenth	Prec	Not prec	FALSE	TRUE	MYB	GO:0003700	Myb-like transcription factor 1 (AHRD V1 **** Q8H271_GOSHI); contains Interpro domain(s) IPR015495 Myb transcription factor
Solyc01g080960.2.1	1	3	TM	Can and Nbenth	Prec	Not prec	FALSE	TRUE			AT-hook DNA-binding protein (Fragment) (AHRD V1 *--* A1DR79_CATRO); contains Interpro domain(s) IPR014476 Predicted AT-hook DNA-binding
Solyc12g008640.1.1	1	3	TM	Can and Nbenth	Prec	Not prec	FALSE	TRUE			Gamma-glutamyltransferase-like protein (AHRD V1 ***- Q9M0G0_ARATH); contains Interpro domain(s) IPR000101 Gamma-glutamyltranspeptidase
Solyc08g074390.2.1	1	3	TM	Can and Nbenth	Prec	Not prec	FALSE	TRUE			Glucan endo-1 3-beta-glucosidase 6 (AHRD V1 ***- B6TW83_MAIZE); contains Interpro domain(s) IPR013781 Glycoside hydrolase, subgroup, catalytic core
Solyc11g064800.1.1	1	3	TM	Can and Nbenth	Prec	Not prec	FALSE	TRUE	SRS		Stylish (AHRD V1 *--- D2KC71_BRARP); contains Interpro domain(s) IPR007818 Protein of unknown function DUF702
Solyc08g079030.2.1	1	3	TM	Can and Nbenth	Prec	Not prec	FALSE	TRUE			Unknown Protein (AHRD V1); contains Interpro domain(s) IPR008581 Protein of unknown function DUF863, plant
Solyc03g006240.2.1	1	3	TM	Can and Nbenth	Prec	Not prec	FALSE	FALSE			GDSL esterase/lipase At5g45910 (AHRD V1 ***- GDL83_ARATH); contains Interpro domain(s) IPR001087 Lipase, GDSL
Solyc04g077480.2.1	1	3	TM	Can and Nbenth	Prec	Not prec	FALSE	TRUE	bHLH	GO:0003700	Transcription factor (AHRD V1 *-** D6MKM4_9ASPA); contains Interpro domain(s) IPR011598 Helix-loop-helix DNA-binding
Solyc01g009860.2.1	1	3	TM	Can and Nbenth	Prec	Not prec	FALSE	FALSE	NAC	GO:0003700	NAC domain transcription factor (AHRD V1 **** Q5DM36_WHEAT); contains Interpro domain(s) IPR003441 No apical meristem (NAM) protein
Solyc02g084960.1.1	1	3	TM	Can and Nbenth	Prec	Not prec	FALSE	TRUE			Genomic DNA chromosome 5 TAC clone K1F13 (AHRD V1 ***- Q9FJZ5_ARATH)
Solyc03g115770.2.1	1	3	TM	Can and Nbenth	Prec	Not prec	FALSE	TRUE			Timing of CAB expression-like
Solyc09g010230.1.1	1	3	TM	Can and Nbenth	Prec	Not prec	FALSE	TRUE	B3	GO:0003700	Auxin response factor 24 (AHRD V1 *-** D9HNV1_MAIZE); contains Interpro domain(s) IPR003340 Transcriptional factor B3
Solyc08g080460.1.1	1	3	TM	Can and Nbenth	Prec	Not prec	FALSE	TRUE			Serine/threonine protein kinase (AHRD V1 *-** C4PKQ3_PRUPE); contains Interpro domain(s) IPR002290 Serine/threonine protein kinase
Solyc09g098420.1.1	1	3	TM	Can and Nbenth	Prec	Not prec	FALSE	TRUE			Receptor like kinase, RLK
Solyc03g121270.2.1	1	3	TM	Can and Nbenth	Prec	Not prec	FALSE	FALSE			IAA-amino acid hydrolase (AHRD V1 **** D5FTH2_POPTO); contains Interpro domain(s) IPR017439 Peptidase M20D, mername-AA028/carboxypeptidase Ss1
Solyc02g087010.2.1	1	3	TM	Can and Nbenth	Prec	Not prec	FALSE	TRUE			NHL repeat-containing protein (AHRD V1 ***- D7KY00_ARALY); contains Interpro domain(s) IPR001258 NHL repeat
Solyc08g079650.2.1	1	3	TM	Can and Nbenth	Prec	Not prec	FALSE	TRUE			ACT domain containing protein expressed (AHRD V1 **-- Q10P43_ORYSJ); contains Interpro domain(s) IPR002912 Amino acid-binding ACT
Solyc06g083370.2.1	1	3	TM	Can and Nbenth	Prec	Not prec	FALSE	FALSE			Os01g0917200 protein (Fragment) (AHRD V1 ***- Q0JGL5_ORYSJ); contains Interpro domain(s) IPR009003 Peptidase, trypsin-like serine and cysteine
Solyc06g054250.2.1	1	3	TM	Can and Nbenth	Prec	Prec	TRUE	TRUE			5&apos-nucleotidase surE (AHRD V1 ***- D6YVT2_WADCW); contains Interpro domain(s) IPR002828 Survival protein SurE-like phosphatase/nucleotidase
Solyc12g005030.1.1	1	3	TM	Can and Nbenth	Prec	Prec	TRUE	FALSE			Calcium-dependent protein kinase (AHRD V1 ***- Q9XER6_SOLTU); contains Interpro domain(s) IPR002290 Serine/threonine protein kinase
Solyc09g082570.2.1	1	3	TM	Can and Nbenth	Prec	Prec	TRUE	TRUE			Neurogenic locus notch protein-like (AHRD V1 ***- B6SSE6_MAIZE)
Solyc03g117100.2.1	1	3	TM	Can and Nbenth	Prec	Prec	TRUE	TRUE			PPPDE peptidase domain-containing protein 1 (AHRD V1 *--- PPDE1_DANRE); contains Interpro domain(s) IPR008580 Protein of unknown function DUF862, eukaryotic
Solyc09g075350.2.1	1	3	TM	Can and Nbenth	Prec	Prec	TRUE	FALSE			Pectinesterase (AHRD V1 ***- B9SAU4_RICCO); contains Interpro domain(s) IPR000070 Pectinesterase, catalytic
Solyc01g109880.2.1	1	3	TM	Can and Nbenth	Prec	Prec	TRUE	TRUE	bZIP	GO:0003677	BZIP transcription factor (AHRD V1 ***- C0KYN1_SOLLC); contains Interpro domain(s) IPR011700 Basic leucine zipper
Solyc11g071470.1.1	1	3	TM	Can and Nbenth	Prec	Prec	TRUE	TRUE			Hydroxycinnamoyl CoA shikimate/quinate hydroxycinnamoyltransferase-like protein (Fragment) (AHRD V1 **-- B9GF60_POPTR); contains Interpro domain(s) IPR003480 Transferase
Solyc01g005560.2.1	1	3	TM	Can and Nbenth	Prec	Prec	TRUE	TRUE			Isocitrate dehydrogenase (AHRD V1 ***- D2D324_GOSHI); contains Interpro domain(s) IPR004790 Isocitrate dehydrogenase NADP-dependent, eukaryotic
Solyc01g099290.2.1	1	3	TM	Can and Nbenth	Prec	Prec	TRUE	FALSE			Cullin-like protein1 (AHRD V1 ***- Q8LP18_PEA); contains Interpro domain(s) IPR016159 Cullin repeat-like
Solyc04g076790.2.1	1	3	TM	Can and Nbenth	Prec	Prec	TRUE	TRUE			Serine hydroxymethyltransferase (AHRD V1 **** B9SMX7_RICCO); contains Interpro domain(s) IPR001085 Serine hydroxymethyltransferase
Solyc11g069030.1.1	1	3	TM	Can and Nbenth	Prec	Prec	TRUE	TRUE	MYB	GO:0003677	MYB transcription factor (AHRD V1 *--- Q9T066_ARATH); contains Interpro domain(s) IPR017930 Myb-type HTH DNA-binding domain
Solyc06g071180.2.1	1	3	TM	Can and Nbenth	Prec	Prec	TRUE	FALSE			Dynein light chain 1 cytoplasmic (AHRD V1 *-*- Q7RN10_PLAYO); contains Interpro domain(s) IPR001372 Dynein light chain, type 1 and 2
Solyc08g005240.1.1	1	3	TM	Can and Nbenth	Prec	Prec	TRUE	TRUE			Lysine-specific demethylase 5B (AHRD V1 *--* KDM5B_HUMAN); contains Interpro domain(s) IPR013129 Transcription factor jumonji
Solyc12g010180.1.1	1	3	TM	Can and Nbenth	Prec	Prec	TRUE	TRUE			Anthranilate synthase (AHRD V1 ***- A1KAT4_AZOSB); contains Interpro domain(s) IPR000991 Glutamine amidotransferase class-I, C-terminal
Solyc06g074630.2.1	1	3	TM	Can and Nbenth	Prec	Prec	TRUE	TRUE			Cellulose synthase-like C6 glycosyltransferase family 2 (AHRD V1 **-* A6N4C3_PHYPA); contains Interpro domain(s) IPR001173 Glycosyl transferase, family 2
Solyc09g011750.2.1	1	3	TM	Can and Nbenth	Prec	Prec	TRUE	TRUE			Receptor-like protein kinase At5g59670 (AHRD V1 *-*- RLK7_ARATH); contains Interpro domain(s) IPR002290 Serine/threonine protein kinase
Solyc08g079020.2.1	1	3	TM	Can and Nbenth	Prec	Prec	TRUE	TRUE			Adenine phosphoribosyltransferase-like protein (AHRD V1 **** Q8LG17_ARATH); contains Interpro domain(s) IPR005764 Adenine phosphoribosyl transferase
Solyc03g097530.2.1	1	3	TM	Nbenth	Not prec	Not prec	FALSE	TRUE			TPD1 (AHRD V1 ***- Q6TLJ2_ARATH)
Solyc12g094520.1.1	1	3	TM	Nbenth	Not prec	Not prec	FALSE	TRUE			4-coumarate-coa ligase (AHRD V1 ***- B9MY03_POPTR); contains Interpro domain(s) IPR000873 AMP-dependent synthetase and ligase
Solyc04g010320.1.1	1	3	TM	Nbenth	Not prec	Not prec	FALSE	TRUE			Cytochrome P450
Solyc09g090760.2.1	1	3	TM	Nbenth	Not prec	Not prec	FALSE	TRUE			Folate/biopterin transporter family protein (AHRD V1 *-*- B6TYM7_MAIZE); contains Interpro domain(s) IPR004324 Biopterin transport-related protein BT1
Solyc10g082020.1.1	1	3	TM	Nbenth	Not prec	Not prec	FALSE	TRUE			Cytokinin riboside 5&apos;-monophosphate phosphoribohydrolase LOG (AHRD V1 **-- LOG_ORYSJ); contains Interpro domain(s) IPR005269 Conserved hypothetical protein CHP00730
Solyc06g053830.2.1	1	3	TM	Nbenth	Not prec	Not prec	FALSE	TRUE		GO:0003700	Auxin responsive protein (AHRD V1 ***- D9IQE6_CATRO); contains Interpro domain(s) IPR003311 AUX/IAA protein
Solyc01g091420.1.1	1	3	TM	Nbenth	Not prec	Not prec	FALSE	TRUE	LBD		LOB domain protein 30 (AHRD V1 ***- D7M5R6_ARALY); contains Interpro domain(s) IPR004883 Lateral organ boundaries, LOB
Solyc09g005070.1.1	1	3	TM	Nbenth	Not prec	Not prec	FALSE	TRUE	bHLH		Transcription factor (Fragment) (AHRD V1 *-*- D6MK13_9ASPA); contains Interpro domain(s) IPR001092 Basic helix-loop-helix dimerisation region bHLH
Solyc08g008360.2.1	1	3	TM	Nbenth	Not prec	Not prec	FALSE	TRUE			Unknown Protein (AHRD V1)
Solyc04g074700.2.1	1	3	TM	Nbenth	Not prec	Not prec	FALSE	TRUE	HD-ZIP	GO:0006355	Homeobox-leucine zipper protein (AHRD V1 *-*- Q9FXN8_ZINEL); contains Interpro domain(s) IPR003106 Leucine zipper, homeobox-associated
Solyc02g093040.2.1	1	3	TM	Nbenth	Not prec	Not prec	FALSE	TRUE			Cathepsin B-like cysteine proteinase (AHRD V1 **-* CYSP_SCHMA); contains Interpro domain(s) IPR013128 Peptidase C1A, papain
Solyc04g051540.2.1	1	3	TM	Nbenth	Prec	Not prec	FALSE	TRUE	WRKY		WRKY family transcription factor (AHRD V1 *-*- D7LBR5_ARALY); contains Interpro domain(s) IPR003657 DNA-binding WRKY
Solyc03g122190.2.1	1	3	TM	Nbenth	Prec	Not prec	FALSE	TRUE			Jasmonate ZIM domain 2 (AHRD V1 **-- C7SCY2_CATRO); contains Interpro domain(s) IPR010399 Tify
Solyc08g080210.2.1	1	3	TM	Nbenth	Prec	Not prec	FALSE	FALSE			DNA-directed RNA polymerase (AHRD V1 ***- B9GKP9_POPTR); contains Interpro domain(s) IPR000722 RNA polymerase, alpha subunit
Solyc08g080520.2.1	1	3	TM	Nbenth	Prec	Not prec	FALSE	TRUE			AT5g06970/MOJ9_14 (AHRD V1 **-- Q8RX56_ARATH); contains Interpro domain(s) IPR008528 Protein of unknown function DUF810
Solyc07g065540.1.1	1	3	TM	Nbenth	Prec	Not prec	FALSE	TRUE			Fasciclin-like arabinogalactan protein 10 (AHRD V1 ***- A9XTL5_GOSHI); contains Interpro domain(s) IPR000782 FAS1 domain
Solyc11g032130.1.1	1	3	TM	Nbenth	Prec	Not prec	FALSE	FALSE			NADPH dehydrogenase 3 (AHRD V1 **-* OYE3_YEAST); contains Interpro domain(s) IPR001155 NADH:flavin oxidoreductase/NADH oxidase, N-terminal
Solyc04g077170.2.1	1	3	TM	Nbenth	Prec	Not prec	FALSE	TRUE			EPIDERMAL PATTERNING FACTOR-like protein 2 (AHRD V1 ***- EPFL2_ARATH)
Solyc01g088660.2.1	1	3	TM	Nbenth	Prec	Not prec	FALSE	TRUE			Os04g0585900 protein (Fragment) (AHRD V1 *-*- Q0JAP2_ORYSJ); contains Interpro domain(s) IPR007650 Protein of unknown function DUF581
Solyc04g071990.2.1	1	3	TM	Nbenth	Prec	Not prec	FALSE	TRUE			Tomato GIGANTEA 1
Solyc07g042270.2.1	1	3	TM	Nbenth	Prec	Not prec	FALSE	FALSE			ATP-dependent RNA helicase (AHRD V1 **** C6LZE8_GIALA); contains Interpro domain(s) IPR011545 DNA/RNA helicase, DEAD/DEAH box type, N-terminal
Solyc07g043310.2.1	1	3	TM	Nbenth	Prec	Not prec	FALSE	FALSE			Aminotransferase (AHRD V1 ***- D2KZ08_WHEAT); contains Interpro domain(s) IPR005814 Aminotransferase class-III
Solyc07g042550.2.1	1	3	TM	Nbenth	Prec	Not prec	FALSE	TRUE			Sucrose synthase (AHRD V1 **** O82691_SOLLC); contains Interpro domain(s) IPR012820 Sucrose synthase, plants and cyanobacteria IPR000368 Sucrose synthase
Solyc03g006590.2.1	1	3	TM	Nbenth	Prec	Not prec	FALSE	TRUE			Unknown Protein (AHRD V1)
Solyc09g042660.2.1	1	3	TM	Nbenth	Prec	Not prec	FALSE	TRUE			CBL-interacting protein kinase 22 (AHRD V1 **** A0MNK8_POPTR); contains Interpro domain(s) IPR002290 Serine/threonine protein kinase
Solyc04g014360.2.1	1	3	TM	Nbenth	Prec	Not prec	FALSE	TRUE	bHLH	GO:0003700	Transcription factor SPATULA (AHRD V1 *-** SPT_ARATH); contains Interpro domain(s) IPR001092 Basic helix-loop-helix dimerisation region bHLH
Solyc08g008310.2.1	1	3	TM	Nbenth	Prec	Not prec	FALSE	TRUE			Long-chain-fatty-acid-CoA ligase (AHRD V1 **** B2WS80_ARAHA); contains Interpro domain(s) IPR000873 AMP-dependent synthetase and ligase
Solyc12g008530.1.1	1	3	TM	Nbenth	Prec	Not prec	FALSE	TRUE			Pectinesterase (AHRD V1 ***- B9RKG6_RICCO); contains Interpro domain(s) IPR000070 Pectinesterase, catalytic
Solyc05g047710.2.1	1	3	TM	Nbenth	Prec	Not prec	FALSE	TRUE			Plant synaptotagmin (AHRD V1 **-- C5X3E4_SORBI); contains Interpro domain(s) IPR018029 C2 membrane targeting protein
Solyc07g006500.2.1	1	4	FM	Can	Not prec	Not prec	FALSE	FALSE			Alpha alpha-trehalose-phosphate synthase (UDP-forming) (AHRD V1 **** D2REU5_ARCPA); contains Interpro domain(s) IPR001830 Glycosyl transferase, family 20
Solyc08g075940.2.1	1	4	FM	Can	Not prec	Not prec	FALSE	FALSE			DNA-directed RNA polymerase (AHRD V1 ***- B9IL57_POPTR); contains Interpro domain(s) IPR015712 DNA-directed RNA polymerase, subunit 2
Solyc08g083050.1.1	1	4	FM	Can	Not prec	Not prec	FALSE	TRUE			Unknown Protein (AHRD V1)
Solyc03g120870.2.1	1	4	FM	Can	Not prec	Not prec	FALSE	TRUE			UPF0497 membrane protein 14 (AHRD V1 ***- U497E_VITVI); contains Interpro domain(s) IPR006459 Uncharacterised protein family UPF0497, trans-membrane plant subgroup
Solyc07g052100.2.1	1	4	FM	Can	Not prec	Not prec	FALSE	TRUE			Chromodomain-helicase-DNA-binding protein 1-like (AHRD V1 *--* CHD1L_DANRE); contains Interpro domain(s) IPR014001 DEAD-like helicase, N-terminal
Solyc09g075420.2.1	1	4	FM	Can	Not prec	Not prec	FALSE	TRUE	ERF	GO:0003677	Ethylene responsive transcription factor 2b (AHRD V1 *-*- C0J9I6_9ROSA); contains Interpro domain(s) IPR001471 Pathogenesis-related transcriptional factor and ERF, DNA-binding IPR001711 Phospholipase C, phosphatidylinositol-specific, Y domain
Solyc03g117980.2.1	1	4	FM	Can	Not prec	Not prec	FALSE	TRUE			Respiratory burst oxidase-like protein (AHRD V1 **** C1IHQ9_9ROSI); contains Interpro domain(s) IPR013121 Ferric reductase, NAD binding
Solyc01g067510.2.1	1	4	FM	Can	Not prec	Not prec	FALSE	TRUE			Receptor-like kinase (AHRD V1 **** A7VM36_MARPO); contains Interpro domain(s) IPR002290 Serine/threonine protein kinase
Solyc05g055400.2.1	1	4	FM	Can	Not prec	Not prec	FALSE	TRUE			Cytochrome P450
Solyc04g054990.2.1	1	4	FM	Can	Not prec	Not prec	FALSE	FALSE			Lipoxygenase homology domain-containing protein 1 (AHRD V1 *--- LOXH1_HUMAN); contains Interpro domain(s) IPR001024 Lipoxygenase, LH2
Solyc06g007180.2.1	1	4	FM	Can	Not prec	Not prec	FALSE	TRUE			Asparagine synthase (Glutamine-hydrolyzing) (AHRD V1 **** A9EDI4_9FLAO); contains Interpro domain(s) IPR006426 Asparagine synthase, glutamine-hydrolyzing
Solyc07g066230.2.1	1	4	FM	Can	Not prec	Prec	FALSE	TRUE			Receptor like kinase, RLK
Solyc12g094450.1.1	1	4	FM	Can	Not prec	Prec	FALSE	TRUE			Peroxisomal multifunctional enzyme type 2 (AHRD V1 **-- B4FP93_MAIZE); contains Interpro domain(s) IPR002539 MaoC-like dehydratase
Solyc08g074480.1.1	1	4	FM	Can	Not prec	Prec	FALSE	TRUE			Cortical cell-delineating protein (AHRD V1 **-- B6UGA2_MAIZE); contains Interpro domain(s) IPR013770 Plant lipid transfer protein and hydrophobic protein, helical
Solyc09g090070.1.1	1	4	FM	Can	Not prec	Prec	FALSE	TRUE			Inorganic phosphate transporter (AHRD V1 **** O22548_SOLLC); contains Interpro domain(s) IPR004738 Phosphate permease
Solyc10g005210.2.1	1	4	FM	Can	Not prec	Prec	FALSE	TRUE			DNA-3-methyladenine glycosylase I (AHRD V1 ***- B4FWT0_MAIZE); contains Interpro domain(s) IPR005019 Methyladenine glycosylase
Solyc12g013700.1.1	1	4	FM	Can	Not prec	Prec	FALSE	FALSE			Aluminum-induced protein-like protein (AHRD V1 ***- Q8S2R9_THEHA)
Solyc07g063640.1.1	1	4	FM	Can	Not prec	Prec	FALSE	TRUE			Wound induced protein (AHRD V1 ***- B6SKC8_MAIZE)
Solyc03g006490.2.1	1	4	FM	Can	Not prec	Prec	FALSE	TRUE			Aluminum-induced protein-like (AHRD V1 ***- Q9FG81_ARATH)
Solyc05g005150.1.1	1	4	FM	Can	Not prec	Prec	FALSE	FALSE			F-box/Kelch repeat-containing F-box family protein (AHRD V1 ***- C4PVT9_ARATH); contains Interpro domain(s) IPR015915 Kelch-type beta propeller
Solyc06g083900.2.1	1	4	FM	Can	Not prec	Prec	FALSE	FALSE	MYB	GO:0003700	Myb-related transcription factor (AHRD V1 **-* B2CZJ1_CAPAN); contains Interpro domain(s) IPR015495 Myb transcription factor
Solyc01g094870.1.1	1	4	FM	Can	Not prec	Prec	FALSE	FALSE			MRNA clone RAFL21-92-I07 (AHRD V1 *--- Q681W9_ARATH); contains Interpro domain(s) IPR006461 Protein of unknown function Cys-rich
Solyc03g112160.2.1	1	4	FM	Can	Not prec	Prec	FALSE	FALSE			Protein DEHYDRATION-INDUCED 19 homolog 5 (AHRD V1 ***- DI195_ORYSJ); contains Interpro domain(s) IPR008598 Drought induced 19
Solyc12g008400.1.1	1	4	FM	Can	Not prec	Prec	FALSE	FALSE			Receptor like kinase, RLK
Solyc04g007340.2.1	1	4	FM	Can	Not prec	Prec	FALSE	FALSE			Unknown Protein (AHRD V1); contains Interpro domain(s) IPR012438 Protein of unknown function DUF1639
Solyc08g078670.2.1	1	4	FM	Can	Not prec	Prec	FALSE	FALSE			Aspartyl protease (AHRD V1 **-- B8YIB7_MIRJA); contains Interpro domain(s) IPR001461 Peptidase A1
Solyc02g089200.2.1	1	4	FM	Can	Not prec	Prec	FALSE	TRUE	MIKC	GO:0003700	MADS-box transcription factor (AHRD V1 **** Q3KSZ0_PRUDU); contains Interpro domain(s) IPR002100 Transcription factor, MADS-box IPR002487 Transcription factor, K-box
Solyc10g086500.1.1	1	4	FM	Can	Not prec	Prec	FALSE	FALSE			3-oxo-5-alpha-steroid 4-dehydrogenase family protein expressed (AHRD V1 ***- Q53NE6_ORYSJ); contains Interpro domain(s) IPR016636 3-oxo-5-alpha-steroid 4-dehydrogenase IPR001104 3-oxo-5-alpha-steroid 4-dehydrogenase, C-terminal
Solyc04g082030.1.1	1	4	FM	Can	Not prec	Prec	FALSE	FALSE			Ornithine decarboxylase (AHRD V1 **** Q9SXF3_TOBAC); contains Interpro domain(s) IPR002433 Ornithine decarboxylase
Solyc01g094970.2.1	1	4	FM	Can	Not prec	Prec	FALSE	FALSE			Glycoside hydrolase family 28 protein/polygalacturonase family protein (AHRD V1 **-- Q1PF10_ARATH); contains Interpro domain(s) IPR012334 Pectin lyase fold
Solyc02g087510.2.1	1	4	FM	Can	Not prec	Prec	FALSE	TRUE			Ribosomal protein S6 kinase alpha-2 (AHRD V1 *-** KS6A2_HUMAN); contains Interpro domain(s) IPR002290 Serine/threonine protein kinase
Solyc04g072030.1.1	1	4	FM	Can	Not prec	Prec	FALSE	FALSE			Interferon-induced GTP-binding protein Mx (Fragment) (AHRD V1 *--- MX_PERFL); contains Interpro domain(s) IPR015577 Interferon-induced Mx protein
Solyc04g076630.2.1	1	4	FM	Can	Not prec	Prec	FALSE	FALSE			Rhamnogalacturonate lyase (AHRD V1 **** A3XLZ2_LEEBM); contains Interpro domain(s) IPR010325 Rhamnogalacturonate lyase
Solyc03g033330.2.1	1	4	FM	Can	Not prec	Prec	FALSE	FALSE			RING finger protein 44 (AHRD V1 *-*- RNF44_MOUSE); contains Interpro domain(s) IPR018957 Zinc finger, C3HC4 RING-type
Solyc02g065290.1.1	1	4	FM	Can	Not prec	Prec	FALSE	FALSE	Dof	GO:0003700	Dof zinc finger protein 6 (AHRD V1 *-*- A5HWF5_HORVD); contains Interpro domain(s) IPR003851 Zinc finger, Dof-type
Solyc06g068550.2.1	1	4	FM	Can	Not prec	Prec	FALSE	FALSE			Aspartic proteinase nepenthesin-1 (AHRD V1 **-- C0JAB4_ORYCO); contains Interpro domain(s) IPR001461 Peptidase A1
Solyc03g115870.2.1	1	4	FM	Can	Not prec	Prec	FALSE	TRUE			Thioredoxin 2 (AHRD V1 ***- Q5ZF47_PLAMJ); contains Interpro domain(s) IPR015467 Thioredoxin, core
Solyc11g066130.1.1	1	4	FM	Can and Nbenth	Not prec	Not prec	FALSE	FALSE			Thaumatin-like protein (AHRD V1 **-- D2KU75_CITJA); contains Interpro domain(s) IPR017949 Thaumatin, conserved site IPR001938 Thaumatin, pathogenesis-related
Solyc04g063210.2.1	1	4	FM	Can and Nbenth	Not prec	Not prec	FALSE	TRUE			Caffeoyl-CoA O-methyltransferase (AHRD V1 **** A0SDG2_9CONI); contains Interpro domain(s) IPR002935 O-methyltransferase, family 3
Solyc04g008060.2.1	1	4	FM	Can and Nbenth	Not prec	Not prec	FALSE	TRUE			Vacuolar iron transporter Ccc1 (AHRD V1 **-* C5GIS5_AJEDR); contains Interpro domain(s) IPR008217 Protein of unknown function DUF125, transmembrane
Solyc12g006860.1.1	1	4	FM	Can and Nbenth	Not prec	Not prec	FALSE	TRUE			Cytochrome P450
Solyc04g074080.2.1	1	4	FM	Can and Nbenth	Not prec	Not prec	FALSE	FALSE			WW domain containing protein expressed (AHRD V1 *-*- Q2QVE4_ORYSJ); contains Interpro domain(s) IPR001202 WW/Rsp5/WWP
Solyc02g079190.2.1	1	4	FM	Can and Nbenth	Not prec	Not prec	FALSE	TRUE			Auxin F-box protein 5 (AHRD V1 **-- D7MPH1_ARALY); contains Interpro domain(s) IPR001810 Cyclin-like F-box
Solyc09g009260.2.1	1	4	FM	Can and Nbenth	Not prec	Not prec	FALSE	TRUE			Fructose-bisphosphate aldolase (AHRD V1 ***- Q2PYX3_SOLTU); contains Interpro domain(s) IPR000741 Fructose-bisphosphate aldolase, class-I
Solyc12g005990.1.1	1	4	FM	Can and Nbenth	Not prec	Not prec	FALSE	TRUE			Dual specificity protein phosphatase 4 (AHRD V1 ***- B6U4B9_MAIZE); contains Interpro domain(s) IPR020422 Dual specificity phosphatase, subgroup, catalytic domain
Solyc06g053480.2.1	1	4	FM	Can and Nbenth	Not prec	Not prec	FALSE	TRUE			Stearoyl-acyl carrier protein desaturase (AHRD V1 **** B7TZ44_SPIOL); contains Interpro domain(s) IPR005067 Fatty acid desaturase, type 2
Solyc01g090460.2.1	1	4	FM	Can and Nbenth	Not prec	Not prec	FALSE	FALSE	HD-ZIP		Homeobox-leucine zipper protein (AHRD V1 *-*- Q39862_SOYBN); contains Interpro domain(s) IPR001356 Homeobox IPR017970 Homeobox, conserved site
Solyc07g062820.1.1	1	4	FM	Can and Nbenth	Not prec	Not prec	FALSE	TRUE			Pentatricopeptide repeat protein PPR1106-17 (AHRD V1 ***- B6SWY6_MAIZE); contains Interpro domain(s) IPR002885 Pentatricopeptide repeat
Solyc11g016970.1.1	1	4	FM	Can and Nbenth	Not prec	Not prec	FALSE	FALSE			Multidrug resistance protein mdtK (AHRD V1 *-*- MDTK_ENTS8); contains Interpro domain(s) IPR002528 Multi antimicrobial extrusion protein MatE
Solyc01g099910.2.1	1	4	FM	Can and Nbenth	Not prec	Not prec	FALSE	TRUE			Epoxide hydrolase (AHRD V1 ***- B3VMR4_NICBE); contains Interpro domain(s) IPR000639 Epoxide hydrolase-like
Solyc03g114460.2.1	1	4	FM	Can and Nbenth	Not prec	Not prec	FALSE	TRUE			Acetyl-coenzyme A synthetase (AHRD V1 ***- D5HA95_SALRM); contains Interpro domain(s) IPR000873 AMP-dependent synthetase and ligase
Solyc02g087620.2.1	1	4	FM	Can and Nbenth	Not prec	Not prec	FALSE	TRUE			Inositol hexakisphosphate and diphosphoinositol-pentakisphosphate kinase 2 (AHRD V1 **-* VIP2_MOUSE); contains Interpro domain(s) IPR000560 Histidine acid phosphatase
Solyc11g009050.1.1	1	4	FM	Can and Nbenth	Not prec	Not prec	FALSE	TRUE			F-box protein-like (AHRD V1 ***- Q67X80_ORYSJ); contains Interpro domain(s) IPR001810 Cyclin-like F-box
Solyc01g102470.2.1	1	4	FM	Can and Nbenth	Not prec	Not prec	FALSE	FALSE			Pentatricopeptide repeat-containing protein (AHRD V1 *-*- D7MEW5_ARALY); contains Interpro domain(s) IPR002885 Pentatricopeptide repeat
Solyc03g123610.2.1	1	4	FM	Can and Nbenth	Not prec	Not prec	FALSE	TRUE			Alanine aminotransferase (AHRD V1 ***- Q6VEJ5_CAPAN); contains Interpro domain(s) IPR004839 Aminotransferase, class I and II
Solyc10g076510.1.1	1	4	FM	Can and Nbenth	Not prec	Not prec	FALSE	TRUE			Pyruvate decarboxylase (AHRD V1 **** B0ZS79_PRUAR); contains Interpro domain(s) IPR012110 Pyruvate decarboxylase/indolepyruvate decarboxylase
Solyc01g107980.2.1	1	4	FM	Can and Nbenth	Not prec	Not prec	FALSE	TRUE			U-box domain-containing protein (AHRD V1 ***- A8IXJ0_BRACM); contains Interpro domain(s) IPR011989 Armadillo-like helical
Solyc01g111880.2.1	1	4	FM	Can and Nbenth	Not prec	Not prec	FALSE	TRUE			Tyrosine-protein kinase transforming protein Src (AHRD V1 *-** SRC_AVIST); contains Interpro domain(s) IPR015783 ATMRK serine/threonine protein kinase-like
Solyc09g072630.2.1	1	4	FM	Can and Nbenth	Not prec	Not prec	FALSE	TRUE			LRR receptor-like serine/threonine-protein kinase, RLP
Solyc06g048410.2.1	1	4	FM	Can and Nbenth	Not prec	Not prec	FALSE	TRUE			Superoxide dismutase (AHRD V1 **** Q7YK44_SOLLC); contains Interpro domain(s) IPR019833 Manganese/iron superoxide dismutase, binding site IPR001189 Manganese/iron superoxide dismutase
Solyc04g076830.2.1	1	4	FM	Can and Nbenth	Not prec	Not prec	FALSE	TRUE			Phosphoglycerate mutase-like protein (AHRD V1 ***- Q8LGT8_SOYBN); contains Interpro domain(s) IPR013078 Phosphoglycerate mutase
Solyc01g010970.2.1	1	4	FM	Can and Nbenth	Not prec	Not prec	FALSE	FALSE			ARGONAUTE 1 (AHRD V1 ***- D6RUV9_TOBAC); contains Interpro domain(s) IPR003165 Stem cell self-renewal protein Piwi
Solyc08g074630.1.1	1	4	FM	Can and Nbenth	Not prec	Not prec	FALSE	FALSE			Polyphenol oxidase (AHRD V1 ***- Q41428_SOLTU); contains Interpro domain(s) IPR016213 Polyphenol oxidase, plant
Solyc02g068410.1.1	1	4	FM	Can and Nbenth	Not prec	Not prec	FALSE	FALSE			AT4G20050-like protein (Fragment) (AHRD V1 *-*- D6PQZ2_9BRAS); contains Interpro domain(s) IPR011050 Pectin lyase fold/virulence factor
Solyc08g063040.2.1	1	4	FM	Can and Nbenth	Not prec	Not prec	FALSE	TRUE	C2H2		Zinc finger protein (AHRD V1 *-*- Q9LVQ7_ARATH); contains Interpro domain(s) IPR007087 Zinc finger, C2H2-type
Solyc10g005000.2.1	1	4	FM	Can and Nbenth	Not prec	Not prec	FALSE	TRUE			Os03g0648300 protein (Fragment) (AHRD V1 *--- Q0DPZ6_ORYSJ); contains Interpro domain(s) IPR000048 IQ calmodulin-binding region
Solyc11g071480.1.1	1	4	FM	Can and Nbenth	Not prec	Not prec	FALSE	TRUE			Hydroxycinnamoyl CoA shikimate/quinate hydroxycinnamoyltransferase-like protein (Fragment) (AHRD V1 **-- B9GF60_POPTR); contains Interpro domain(s) IPR003480 Transferase
Solyc04g078540.2.1	1	4	FM	Can and Nbenth	Not prec	Prec	FALSE	FALSE			Cathepsin B-like cysteine proteinase (AHRD V1 **-* CYSP_SCHMA); contains Interpro domain(s) IPR013128 Peptidase C1A, papain
Solyc07g063940.1.1	1	4	FM	Can and Nbenth	Not prec	Prec	FALSE	FALSE	GRAS	GO:0003700	GRAS family transcription factor (AHRD V1 **-* B9I7E1_POPTR); contains Interpro domain(s) IPR005202 GRAS transcription factor
Solyc08g083210.2.1	1	4	FM	Can and Nbenth	Not prec	Prec	FALSE	TRUE			Endoglucanase 1 (AHRD V1 ***- B6U0P7_MAIZE); contains Interpro domain(s) IPR001701 Glycoside hydrolase, family 9
Solyc04g080290.2.1	1	4	FM	Can and Nbenth	Not prec	Prec	FALSE	FALSE			CRAL/TRIO domain containing protein expressed (AHRD V1 **-- Q75GU9_ORYSJ); contains Interpro domain(s) IPR001251 Cellular retinaldehyde-binding/triple function, C-terminal
Solyc02g081120.2.1	1	4	FM	Can and Nbenth	Not prec	Prec	FALSE	TRUE	TALE		Knotted-1-like homeobox protein H1 (AHRD V1 ***- Q8GUS6_TOBAC); contains Interpro domain(s) IPR005541 KNOX2
Solyc02g081010.1.1	1	4	FM	Can and Nbenth	Not prec	Prec	FALSE	TRUE		GO:0003700	Transcription factor jumonji domain-containing protein (AHRD V1 **-* D7KN75_ARALY); contains Interpro domain(s) IPR013129 Transcription factor jumonji
Solyc04g071890.2.1	1	4	FM	Can and Nbenth	Not prec	Prec	FALSE	FALSE			Peroxidase 4 (AHRD V1 **** B7UCP4_LITCN); contains Interpro domain(s) IPR002016 Haem peroxidase, plant/fungal/bacterial
Solyc04g082880.2.1	1	4	FM	Can and Nbenth	Not prec	Prec	FALSE	TRUE			Diphosphate--fructose-6-phosphate 1-phosphotransferase (AHRD V1 ***- C8PT93_9SPIO); contains Interpro domain(s) IPR011183 Pyrophosphate-dependent phosphofructokinase PfpB
Solyc06g068540.2.1	1	4	FM	Can and Nbenth	Not prec	Prec	FALSE	FALSE			Transcription regulatory protein SNF5 (AHRD V1 *-*- D3B6R9_POLPA)
Solyc08g083230.1.1	1	4	FM	Can and Nbenth	Not prec	Prec	FALSE	FALSE	GRF		Growth-regulating factor 3 (AHRD V1 *--- Q6AWY6_ORYSJ); contains Interpro domain(s) IPR014977 WRC
Solyc07g042170.2.1	1	4	FM	Can and Nbenth	Not prec	Prec	FALSE	TRUE			Jasmonate ZIM-domain protein 3 (AHRD V1 **-- B3Y563_TOBAC); contains Interpro domain(s) IPR010399 Tify
Solyc01g006400.2.1	1	4	FM	Can and Nbenth	Not prec	Prec	FALSE	TRUE			Cysteine-rich extensin-like protein-4 (AHRD V1 *-*- Q08197_TOBAC)
Solyc02g088340.2.1	1	4	FM	Can and Nbenth	Not prec	Prec	FALSE	FALSE	WRKY	GO:0003700	WRKY transcription factor-c (AHRD V1 **** Q5DJV3_CAPAN); contains Interpro domain(s) IPR003657 DNA-binding WRKY
Solyc11g010710.1.1	1	4	FM	Can and Nbenth	Not prec	Prec	FALSE	FALSE	AP2	GO:0003677_GO:0006355	AP2-like ethylene-responsive transcription factor At1g16060 (AHRD V1 *-*- AP2L1_ARATH); contains Interpro domain(s) IPR001471 Pathogenesis-related transcriptional factor and ERF, DNA-binding
Solyc10g080690.1.1	1	4	FM	Can and Nbenth	Not prec	Prec	FALSE	TRUE			Patatin-like protein 3 (AHRD V1 ***- B6TPQ5_MAIZE); contains Interpro domain(s) IPR002641 Patatin
Solyc01g008110.2.1	1	4	FM	Can and Nbenth	Not prec	Prec	FALSE	TRUE			Cytochrome P450
Solyc07g047960.2.1	1	4	FM	Can and Nbenth	Not prec	Prec	FALSE	FALSE	WRKY	GO:0003700	WRKY transcription factor 2 (AHRD V1 **** C9DHZ1_9ROSI); contains Interpro domain(s) IPR003657 DNA-binding WRKY
Solyc08g076670.2.1	1	4	FM	Can and Nbenth	Not prec	Prec	FALSE	TRUE			Transmembrane protein 41B (AHRD V1 **-- TM41B_HUMAN); contains Interpro domain(s) IPR015414 SNARE associated Golgi protein
Solyc08g005560.2.1	1	4	FM	Can and Nbenth	Not prec	Prec	FALSE	FALSE			Binding protein (AHRD V1 ***- D7MGU4_ARALY)
Solyc07g007330.1.1	1	4	FM	Can and Nbenth	Not prec	Prec	FALSE	FALSE			Serine-rich protein (AHRD V1 ***- A1YMW6_BRACM)
Solyc01g079480.2.1	1	4	FM	Can and Nbenth	Not prec	Prec	FALSE	TRUE	bZIP	GO:0003700	BZIP transcription factor (AHRD V1 **-* Q1HW69_CAPAN); contains Interpro domain(s) IPR011616 bZIP transcription factor, bZIP-1
Solyc02g086180.2.1	1	4	FM	Can and Nbenth	Not prec	Prec	FALSE	FALSE			Sterol C-5 desaturase (AHRD V1 **** D7FW86_ECTSI); contains Interpro domain(s) IPR006694 Fatty acid hydroxylase
Solyc01g110570.2.1	1	4	FM	Can and Nbenth	Not prec	Prec	FALSE	TRUE			Auxin-induced SAUR-like protein (AHRD V1 **-- Q8S349_CAPAN); contains Interpro domain(s) IPR003676 Auxin responsive SAUR protein
Solyc01g105280.2.1	1	4	FM	Can and Nbenth	Not prec	Prec	FALSE	FALSE			Protein phosphatase 2C-like (AHRD V1 ***- A2Q6E4_MEDTR); contains Interpro domain(s) IPR015655 Protein phosphatase 2C
Solyc01g096080.2.1	1	4	FM	Can and Nbenth	Not prec	Prec	FALSE	FALSE			Unknown Protein (AHRD V1)
Solyc01g096100.2.1	1	4	FM	Can and Nbenth	Not prec	Prec	FALSE	FALSE			AT2G46550 protein (Fragment) (AHRD V1 ***- B9DHY8_ARATH)
Solyc04g081240.2.1	1	4	FM	Can and Nbenth	Not prec	Prec	FALSE	FALSE	ARF		Auxin response factor 5 (AHRD V1 ***- D9IVB5_SOLLC); contains Interpro domain(s) IPR010525 Auxin response factor
Solyc04g050960.2.1	1	4	FM	Can and Nbenth	Not prec	Prec	FALSE	FALSE			Chromatin remodeling complex subunit (AHRD V1 *--- B9N3S4_POPTR); contains Interpro domain(s) IPR012287 Homeodomain-related
Solyc11g011310.1.1	1	4	FM	Can and Nbenth	Not prec	Prec	FALSE	TRUE			Rhamnogalacturonate lyase (AHRD V1 ***- A3XLZ2_LEEBM); contains Interpro domain(s) IPR010325 Rhamnogalacturonate lyase
Solyc06g073730.1.1	1	4	FM	Can and Nbenth	Not prec	Prec	FALSE	FALSE	EIL	GO:0003700	Ethylene insensitive 3 class transcription factor (AHRD V1 **** D5L146_MALDO); contains Interpro domain(s) IPR006957 Ethylene insensitive 3
Solyc01g110350.2.1	1	4	FM	Can and Nbenth	Not prec	Prec	FALSE	TRUE			Unknown Protein (AHRD V1)
Solyc02g063450.2.1	1	4	FM	Can and Nbenth	Not prec	Prec	FALSE	FALSE			Hypothetical YFW family protein 5 (AHRD V1 *--- Q5AP84_CANAL); contains Interpro domain(s) IPR009836 Protein of unknown function DUF1399
Solyc05g010590.2.1	1	4	FM	Can and Nbenth	Not prec	Prec	FALSE	TRUE			WPP domain-interacting tail-anchored protein 2 (AHRD V1 ***- WIT2_ARATH)
Solyc03g117600.2.1	1	4	FM	Can and Nbenth	Not prec	Prec	FALSE	FALSE			Hydroxycinnamoyl-CoA shikimate/quinate hydroxycinnamoyltransferase (AHRD V1 **-* A4ZKI0_COFAR); contains Interpro domain(s) IPR003480 Transferase
Solyc02g081830.2.1	1	4	FM	Can and Nbenth	Prec	Not prec	FALSE	TRUE			HAD-superfamily hydrolase (AHRD V1 ***- D5A3P4_SPIPL); contains Interpro domain(s) IPR011949 HAD-superfamily hydrolase, subfamily IA, REG-2-like
Solyc07g055210.2.1	1	4	FM	Can and Nbenth	Prec	Not prec	FALSE	TRUE			Aspartate aminotransferase (AHRD V1 ***- B9SW33_RICCO); contains Interpro domain(s) IPR000796 Aspartate/other aminotransferase
Solyc09g098290.2.1	1	4	FM	Can and Nbenth	Prec	Not prec	FALSE	TRUE			Receptor like kinase, RLK
Solyc04g076960.2.1	1	4	FM	Can and Nbenth	Prec	Not prec	FALSE	FALSE			Sucrose transporter (AHRD V1 **** Q9FVJ6_SOLLC); contains Interpro domain(s) IPR005989 Sucrose/H+ symporter, plant
Solyc04g015560.2.1	1	4	FM	Can and Nbenth	Prec	Not prec	FALSE	FALSE			Beta-D-glucosidase (AHRD V1 ***- Q7XAS3_GOSHI); contains Interpro domain(s) IPR001764 Glycoside hydrolase, family 3, N-terminal
Solyc04g009810.2.1	1	4	FM	Can and Nbenth	Prec	Not prec	FALSE	TRUE			Pelota homolog (AHRD V1 ***- C3KIY5_ANOFI); contains Interpro domain(s) IPR004405 Probable translation factor pelota
Solyc02g080220.2.1	1	4	FM	Can and Nbenth	Prec	Not prec	FALSE	TRUE			Pectinesterase (AHRD V1 ***- B9RXQ4_RICCO); contains Interpro domain(s) IPR000070 Pectinesterase, catalytic
Solyc03g117300.2.1	1	4	FM	Can and Nbenth	Prec	Not prec	FALSE	FALSE			Nodulin-like protein (AHRD V1 ***- Q8H6R3_PONTR); contains Interpro domain(s) IPR010658 Nodulin-like
Solyc11g010950.1.1	1	4	FM	Can and Nbenth	Prec	Not prec	FALSE	TRUE			Elongator complex protein 4 (AHRD V1 ***- ELP4_BOVIN); contains Interpro domain(s) IPR008728 Elongator complex protein 4
Solyc04g058180.2.1	1	4	FM	Can and Nbenth	Prec	Not prec	FALSE	TRUE			Dehydration-responsive family protein (AHRD V1 **-- D7LDR4_ARALY); contains Interpro domain(s) IPR004159 Protein of unknown function DUF248, methyltransferase putative
Solyc03g119530.2.1	1	4	FM	Can and Nbenth	Prec	Not prec	FALSE	FALSE	LBD		LOB domain protein 42 (AHRD V1 ***- D7KWD0_ARALY); contains Interpro domain(s) IPR004883 Lateral organ boundaries, LOB
Solyc02g090730.2.1	1	4	FM	Can and Nbenth	Prec	Not prec	FALSE	FALSE			Cell number regulator 1 (AHRD V1 **-- B6TZ45_MAIZE); contains Interpro domain(s) IPR006461 Protein of unknown function Cys-rich
Solyc11g012130.1.1	1	4	FM	Can and Nbenth	Prec	Not prec	FALSE	FALSE			Blue copper protein (AHRD V1 *--- B6U7P6_MAIZE); contains Interpro domain(s) IPR008972 Cupredoxin
Solyc04g049920.2.1	1	4	FM	Can and Nbenth	Prec	Not prec	FALSE	TRUE			RNA binding protein-like (AHRD V1 **-- Q8LFQ5_ARATH); contains Interpro domain(s) IPR000504 RNA recognition motif, RNP-1
Solyc07g062810.2.1	1	4	FM	Can and Nbenth	Prec	Not prec	FALSE	TRUE			Branched-chain amino acid aminotransferase-like (AHRD V1 **** Q5NAM3_ORYSJ); contains Interpro domain(s) IPR001544 Aminotransferase, class IV
Solyc06g065630.2.1	1	4	FM	Can and Nbenth	Prec	Not prec	FALSE	TRUE			Monooxygenase (AHRD V1 **** B5GNT3_STRCL); contains Interpro domain(s) IPR000103 Pyridine nucleotide-disulphide oxidoreductase, class-II
Solyc12g007160.1.1	1	4	FM	Can and Nbenth	Prec	Prec	TRUE	TRUE			Protein ABIL1 (AHRD V1 *--- B6TCZ2_MAIZE)
Solyc00g050430.2.1	1	4	FM	Can and Nbenth	Prec	Prec	TRUE	TRUE	bHLH		BHLH transcription factor (AHRD V1 *-*- A9YWR2_MEDTR); contains Interpro domain(s) IPR011598 Helix-loop-helix DNA-binding
Solyc02g083250.2.1	1	4	FM	Can and Nbenth	Prec	Prec	TRUE	FALSE			Cellular retinaldehyde-binding/triple function C-terminal (AHRD V1 **-- B6SN40_MAIZE); contains Interpro domain(s) IPR001251 Cellular retinaldehyde-binding/triple function, C-terminal
Solyc02g081670.1.1	1	4	FM	Can and Nbenth	Prec	Prec	TRUE	TRUE			Fimbriata (Fragment) (AHRD V1 **-- Q6QVW9_MIMLE); contains Interpro domain(s) IPR001810 Cyclin-like F-box
Solyc03g121060.2.1	1	4	FM	Can and Nbenth	Prec	Prec	TRUE	TRUE		GO:0003700	Auxin response factor 9 (AHRD V1 *-** ARFI_ARATH); contains Interpro domain(s) IPR003311 AUX/IAA protein
Solyc05g005810.2.1	1	4	FM	Can and Nbenth	Prec	Prec	TRUE	FALSE			Uncharacterized basic helix-loop-helix protein At1g06150 (AHRD V1 *-*- Y1615_ARATH)
Solyc05g015750.2.1	1	4	FM	Can and Nbenth	Prec	Prec	TRUE	FALSE	MIKC	GO:0003700	Transcription factor MADS-box 2 (AHRD V1 **** D5HSY6_9ROSA); contains Interpro domain(s) IPR002100 Transcription factor, MADS-box IPR002487 Transcription factor, K-box
Solyc06g073190.2.1	1	4	FM	Can and Nbenth	Prec	Prec	TRUE	TRUE			Fructokinase-like (AHRD V1 **-* Q307Z3_SOLTU); contains Interpro domain(s) IPR002173 Carbohydrate/puine kinase, PfkB, conserved site
Solyc02g090220.2.1	1	4	FM	Can and Nbenth	Prec	Prec	TRUE	FALSE	Dof	GO:0003700	Dof zinc finger protein (AHRD V1 *-*- Q9SXG5_ORYSA); contains Interpro domain(s) IPR003851 Zinc finger, Dof-type
Solyc05g049980.2.1	1	4	FM	Can and Nbenth	Prec	Prec	TRUE	FALSE			Glycoside hydrolase family 28 protein/polygalacturonase family protein (AHRD V1 **-- Q1PF10_ARATH); contains Interpro domain(s) IPR012334 Pectin lyase fold
Solyc12g009300.1.1	1	4	FM	Can and Nbenth	Prec	Prec	TRUE	FALSE			Sucrose synthase (AHRD V1 **** O82693_SOLLC); contains Interpro domain(s) IPR012820 Sucrose synthase, plants and cyanobacteria IPR000368 Sucrose synthase
Solyc09g008830.2.1	1	4	FM	Can and Nbenth	Prec	Prec	TRUE	FALSE			Os01g0318400 protein (Fragment) (AHRD V1 *-*- Q7XXQ7_ORYSJ)
Solyc02g068070.2.1	1	4	FM	Can and Nbenth	Prec	Prec	TRUE	TRUE			Lipase (AHRD V1 **** Q1XBG1_RICCO); contains Interpro domain(s) IPR006693 AB-hydrolase associated lipase region
Solyc11g012450.1.1	1	4	FM	Can and Nbenth	Prec	Prec	TRUE	FALSE			Predicted transporter (AHRD V1 ***- Q2TZC8_ASPOR); contains Interpro domain(s) IPR003663 Sugar/inositol transporter
Solyc03g064030.2.1	1	4	FM	Can and Nbenth	Prec	Prec	TRUE	FALSE			C4orf29 homolog (AHRD V1 **-- B5X1A7_SALSA); contains Interpro domain(s) IPR019149 Protein of unknown function DUF2048
Solyc05g055880.2.1	1	4	FM	Can and Nbenth	Prec	Prec	TRUE	TRUE			Nucleolar protein 5 (AHRD V1 ***- Q6P364_XENTR); contains Interpro domain(s) IPR002687 Pre-mRNA processing ribonucleoprotein, binding region
Solyc09g007260.2.1	1	4	FM	Can and Nbenth	Prec	Prec	TRUE	TRUE	AP2	GO:0003677	AP2-like ethylene-responsive transcription factor At1g79700 (AHRD V1 *--- AP2L3_ARATH); contains Interpro domain(s) IPR001471 Pathogenesis-related transcriptional factor and ERF, DNA-binding
Solyc03g111310.2.1	1	4	FM	Can and Nbenth	Prec	Prec	TRUE	FALSE			AKIN gamma (AHRD V1 **-- Q7XYY0_MEDTR); contains Interpro domain(s) IPR000644 Cystathionine beta-synthase, core
Solyc01g100370.2.1	1	4	FM	Can and Nbenth	Prec	Prec	TRUE	TRUE			Universal stress protein (AHRD V1 ***- B6SNQ1_MAIZE); contains Interpro domain(s) IPR006016 UspA
Solyc09g075210.2.1	1	4	FM	Can and Nbenth	Prec	Prec	TRUE	FALSE			Late embryogenesis abundant protein 5 (AHRD V1 ***- Q1HGG0_9ROSI); contains Interpro domain(s) IPR004926 Late embryogenesis abundant protein 3
Solyc07g053220.1.1	1	4	FM	Can and Nbenth	Prec	Prec	TRUE	FALSE			Receptor-like protein kinase (AHRD V1 ***- Q9LLN5_ORYSA); contains Interpro domain(s) IPR002290 Serine/threonine protein kinase
Solyc07g006380.2.1	1	4	FM	Can and Nbenth	Prec	Prec	TRUE	FALSE			Defensin-like protein (AHRD V1 ***- Q948T3_PYRPY); contains Interpro domain(s) IPR008177 Gamma Purothionin
Solyc10g080880.1.1	1	4	FM	Can and Nbenth	Prec	Prec	TRUE	TRUE			Auxin efflux carrier (AHRD V1 ***- D6RT09_SOLLC); contains Interpro domain(s) IPR014024 Auxin efflux carrier, subgroup
Solyc03g114840.2.1	1	4	FM	Can and Nbenth	Prec	Prec	TRUE	TRUE	MIKC	GO:0003700	MADS box transcription factor 11 (AHRD V1 **** D9IFM5_ONCHC); contains Interpro domain(s) IPR002100 Transcription factor, MADS-box IPR002487 Transcription factor, K-box
Solyc08g081480.2.1	1	4	FM	Can and Nbenth	Prec	Prec	TRUE	TRUE			Polygalacturonase-like protein (AHRD V1 **-- Q84LI7_FRAAN); contains Interpro domain(s) IPR012334 Pectin lyase fold
Solyc02g080230.2.1	1	4	FM	Can and Nbenth	Prec	Prec	TRUE	FALSE			Rop-interactive crib motif-containing protein 1 (AHRD V1 *--- D7LGA6_ARALY); contains Interpro domain(s) IPR000095 PAK-box/P21-Rho-binding
Solyc02g094400.2.1	1	4	FM	Can and Nbenth	Prec	Prec	TRUE	TRUE			Glycerophosphodiester phosphodiesterase gde1 (AHRD V1 ***- B6JW52_SCHJY); contains Interpro domain(s) IPR004129 Glycerophosphoryl diester phosphodiesterase
Solyc01g104950.2.1	1	4	FM	Can and Nbenth	Prec	Prec	TRUE	TRUE			Alpha-L-arabinofuranosidase/beta-D-xylosidase (AHRD V1 **** D9D7L0_MALDO); contains Interpro domain(s) IPR001764 Glycoside hydrolase, family 3, N-terminal
Solyc04g077830.2.1	1	4	FM	Can and Nbenth	Prec	Prec	TRUE	TRUE			Calmodulin-binding protein (AHRD V1 **-* Q7XJB9_ORYSI); contains Interpro domain(s) IPR011990 Tetratricopeptide-like helical
Solyc03g121790.2.1	1	4	FM	Nbenth	Not prec	Not prec	FALSE	TRUE			EPIDERMAL PATTERNING FACTOR-like protein 3 (AHRD V1 ***- EPFL3_ARATH)
Solyc03g095780.1.1	1	4	FM	Nbenth	Not prec	Not prec	FALSE	TRUE			Abscisic acid receptor PYL6 (AHRD V1 **-* PYL6_ARATH); contains Interpro domain(s) IPR019587 Polyketide cyclase/dehydrase
Solyc10g038080.1.1	1	4	FM	Nbenth	Not prec	Not prec	FALSE	TRUE			Shikimate dehydrogenase (AHRD V1 ***- B6TSW1_MAIZE); contains Interpro domain(s) IPR001381 Dehydroquinase class I
Solyc02g038740.2.1	1	4	FM	Nbenth	Not prec	Not prec	FALSE	TRUE			3-hydroxy-3-methylglutaryl coenzyme A reductase (AHRD V1 **** Q9FS01_SOLTU); contains Interpro domain(s) IPR004554 Hydroxymethylglutaryl-CoA reductase, class I, catalytic
Solyc11g073130.1.1	1	4	FM	Nbenth	Not prec	Not prec	FALSE	FALSE			Protein tyrosine phosphatase 1B (AHRD V1 *-*- D9IVF2_STRIE); contains Interpro domain(s) IPR007482 Protein-tyrosine phosphatase-like, PTPLA
Solyc06g075360.2.1	1	4	FM	Nbenth	Not prec	Not prec	FALSE	FALSE			Senescence-associated protein (AHRD V1 ***- B6T9C5_MAIZE); contains Interpro domain(s) IPR000301 Tetraspanin, subgroup
Solyc04g076820.1.1	1	4	FM	Nbenth	Not prec	Not prec	FALSE	FALSE			Octicosapeptide/Phox/Bem1p domain-containing protein (AHRD V1 *--- D7MPG4_ARALY); contains Interpro domain(s) IPR000270 Octicosapeptide/Phox/Bem1p
Solyc02g080510.1.1	1	4	FM	Nbenth	Not prec	Not prec	FALSE	FALSE			Arabidopsis thaliana genomic DNA chromosome 5 P1 clone MOK16 (AHRD V1 *-*- Q9LYW2_ARATH); contains Interpro domain(s) IPR007608 Protein of unknown function DUF584
Solyc09g005110.2.1	1	4	FM	Nbenth	Not prec	Not prec	FALSE	TRUE			Pyruvate decarboxylase 1 (AHRD V1 **** Q84V95_LOTCO); contains Interpro domain(s) IPR012110 Pyruvate decarboxylase/indolepyruvate decarboxylase
Solyc10g052470.1.1	1	4	FM	Nbenth	Not prec	Not prec	FALSE	TRUE	MYB_related	GO:0003700	Myb family transcription factor (Fragment) (AHRD V1 **** D7KSM0_ARALY); contains Interpro domain(s) IPR017884 SANT, eukarya
Solyc03g113060.2.1	1	4	FM	Nbenth	Not prec	Not prec	FALSE	TRUE			ATP-binding cassette transporter (AHRD V1 ***- D8RFW2_SELML); contains Interpro domain(s) IPR003439 ABC transporter-like
Solyc08g036570.1.1	1	4	FM	Nbenth	Not prec	Not prec	FALSE	TRUE			Glutaredoxin (AHRD V1 **** B9GF65_POPTR); contains Interpro domain(s) IPR011905 Glutaredoxin-like, plant II
Solyc10g008400.1.1	1	4	FM	Nbenth	Not prec	Not prec	FALSE	FALSE			RING finger protein 5 (AHRD V1 *--- B6TI40_MAIZE); contains Interpro domain(s) IPR018957 Zinc finger, C3HC4 RING-type
Solyc03g060510.2.1	1	4	FM	Nbenth	Not prec	Not prec	FALSE	FALSE			Membrane protein (AHRD V1 **-- D0BK36_9LACT); contains Interpro domain(s) IPR008537 Protein of unknown function DUF819
Solyc12g094440.1.1	1	4	FM	Nbenth	Not prec	Not prec	FALSE	TRUE			High mobility group family (Fragment) (AHRD V1 **-- B9GFX2_POPTR); contains Interpro domain(s) IPR001606 AT-rich interaction region
Solyc07g032740.2.1	1	4	FM	Nbenth	Not prec	Not prec	FALSE	TRUE			Aspartate aminotransferase (AHRD V1 **** A9PHH1_POPTR); contains Interpro domain(s) IPR000796 Aspartate/other aminotransferase
Solyc02g089290.2.1	1	4	FM	Nbenth	Not prec	Not prec	FALSE	TRUE			ATP binding / kinase/ protein serine / threonine kinase (AHRD V1 **** C5DB47_VITVI); contains Interpro domain(s) IPR002290 Serine/threonine protein kinase
Solyc04g025510.2.1	1	4	FM	Nbenth	Not prec	Not prec	FALSE	FALSE			Os02g0194300 protein (Fragment) (AHRD V1 *-*- Q0E347_ORYSJ); contains Interpro domain(s) IPR014854 Nse4
Solyc04g014260.1.1	1	4	FM	Nbenth	Not prec	Not prec	FALSE	FALSE	ZF-HD	GO:0003700	Zinc finger-homeodomain protein 1 (Fragment) (AHRD V1 **-- B0LK17_YUCFI); contains Interpro domain(s) IPR006456 ZF-HD homeobox protein Cys/His-rich dimerisation region
Solyc07g017610.2.1	1	4	FM	Nbenth	Not prec	Not prec	FALSE	FALSE			Saccharopine dehydrogenase (NAD(+) L-glutamate-forming) (AHRD V1 *-** C7PUW7_CHIPD); contains Interpro domain(s) IPR005097 Saccharopine dehydrogenase
Solyc10g085740.1.1	1	4	FM	Nbenth	Not prec	Not prec	FALSE	FALSE			GDSL esterase/lipase At5g03820 (AHRD V1 ***- GDL73_ARATH); contains Interpro domain(s) IPR001087 Lipase, GDSL
Solyc02g084680.2.1	1	4	FM	Nbenth	Not prec	Not prec	FALSE	TRUE	SRS	GO:0003700	Short internodes 2 (AHRD V1 **-- B9MXK1_POPTR); contains Interpro domain(s) IPR007818 Protein of unknown function DUF702
Solyc01g104880.2.1	1	4	FM	Nbenth	Not prec	Not prec	FALSE	TRUE			Phosphatidylserine decarboxylase proenzyme 2 (AHRD V1 **** D3AWK7_POLPA); contains Interpro domain(s) IPR005221 Phosphatidylserine decarboxylase
Solyc05g007240.1.1	1	4	FM	Nbenth	Not prec	Not prec	FALSE	FALSE			TO109-12 (Fragment) (AHRD V1 *-*- Q3LVG1_TAROF)
Solyc02g065340.1.1	1	4	FM	Nbenth	Not prec	Not prec	FALSE	FALSE	B3	GO:0006355	B3 domain-containing protein REM14 (AHRD V1 ***- REM14_ARATH); contains Interpro domain(s) IPR003340 Transcriptional factor B3
Solyc03g113710.2.1	1	4	FM	Nbenth	Not prec	Not prec	FALSE	TRUE			Formin 3 (AHRD V1 *-*- D0QAN4_ARATH); contains Interpro domain(s) IPR015425 Actin-binding FH2
Solyc08g081740.2.1	1	4	FM	Nbenth	Not prec	Not prec	FALSE	FALSE			Katanin p60 ATPase-containing subunit (AHRD V1 *--* KTNA1_ARATH); contains Interpro domain(s) IPR003959 ATPase, AAA-type, core
Solyc01g093960.2.1	1	4	FM	Nbenth	Prec	Not prec	FALSE	TRUE	MIKC		MADS box transcription factor (AHRD V1 ***- Q2NNC0_ELAGV); contains Interpro domain(s) IPR002487 Transcription factor, K-box
Solyc02g077880.2.1	1	4	FM	Nbenth	Prec	Not prec	FALSE	FALSE			Auxin-repressed protein (AHRD V1 ***- Q6PXE1_9SOLN); contains Interpro domain(s) IPR008406 Dormancyauxin associated
Solyc04g082410.2.1	1	4	FM	Nbenth	Prec	Not prec	FALSE	TRUE			BTB/POZ domain-containing protein (AHRD V1 **-- D7LC69_ARALY); contains Interpro domain(s) IPR013089 Kelch related
Solyc03g098710.1.1	1	4	FM	Nbenth	Prec	Not prec	FALSE	FALSE			Kunitz-type proteinase inhibitor A4 (Fragment) (AHRD V1 **** C5IWR3_SOLBR); contains Interpro domain(s) IPR011065 Kunitz inhibitor ST1-like
Solyc01g079880.2.1	1	4	FM	Nbenth	Prec	Not prec	FALSE	TRUE			Asparagine synthetase (AHRD V1 *--- Q9ZST6_ARATH)
Solyc10g051390.1.1	1	4	FM	Nbenth	Prec	Not prec	FALSE	FALSE			RNA-binding glycine-rich protein-1b (AHRD V1 **** Q40427_NICSY); contains Interpro domain(s) IPR015465 RNA recognition motif, glycine rich protein
Solyc02g093910.2.1	1	4	FM	Nbenth	Prec	Not prec	FALSE	TRUE			Kelch repeat-containing protein-like (AHRD V1 ***- Q6ZK44_ORYSJ); contains Interpro domain(s) IPR015915 Kelch-type beta propeller
Solyc04g064620.2.1	1	4	FM	Nbenth	Prec	Not prec	FALSE	TRUE			RAG1-activating protein 1 homolog (AHRD V1 **-- R1AP1_DROPS); contains Interpro domain(s) IPR018179 RAG1-activating protein 1 homologue
Solyc08g080570.2.1	1	4	FM	Nbenth	Prec	Not prec	FALSE	FALSE			UDP-glucose 4-epimerase (AHRD V1 **** B0M3E8_PEA); contains Interpro domain(s) IPR005886 UDP-glucose 4-epimerase
Solyc04g074770.2.1	1	4	FM	Nbenth	Prec	Not prec	FALSE	FALSE			Unknown Protein (AHRD V1)
Solyc11g071290.1.1	1	4	FM	Nbenth	Prec	Not prec	FALSE	TRUE			Alcohol dehydrogenase (AHRD V1 **** Q43169_SOLTU); contains Interpro domain(s) IPR002085 Alcohol dehydrogenase superfamily, zinc-containing
Solyc06g060110.2.1	1	4	FM	Nbenth	Prec	Not prec	FALSE	TRUE			Amino acid permease (AHRD V1 **** B9GU10_POPTR); contains Interpro domain(s) IPR013057 Amino acid transporter, transmembrane
Solyc02g082420.2.1	1	4	FM	Nbenth	Prec	Not prec	FALSE	FALSE			Ring finger protein (AHRD V1 *-*- O49869_HORVU); contains Interpro domain(s) IPR018957 Zinc finger, C3HC4 RING-type
Solyc12g038510.1.1	1	4	FM	Nbenth	Prec	Not prec	FALSE	TRUE	MIKC		MADS box transcription factor 11 (AHRD V1 ***- D9IFM5_ONCHC); contains Interpro domain(s) IPR002487 Transcription factor, K-box
Solyc03g098780.1.1	1	4	FM	Nbenth	Prec	Not prec	FALSE	FALSE			Kunitz-type protease inhibitor (AHRD V1 **** Q3S488_SOLTU); contains Interpro domain(s) IPR002160 Proteinase inhibitor I3, Kunitz legume
Solyc01g066720.2.1	1	4	FM	Nbenth	Prec	Not prec	FALSE	TRUE			Hypoxia induced protein conserved region containing protein (AHRD V1 ***- B6UCX6_MAIZE); contains Interpro domain(s) IPR007667 Hypoxia induced protein conserved region
Solyc05g041200.2.1	1	4	FM	Nbenth	Prec	Not prec	FALSE	FALSE			4-hydroxyphenylpyruvate dioxygenase (AHRD V1 **** B7X935_HEVBR); contains Interpro domain(s) IPR005956 4-hydroxyphenylpyruvate dioxygenase
Solyc02g031710.2.1	1	4	FM	Nbenth	Prec	Not prec	FALSE	TRUE			Protein binding protein (AHRD V1 **-- D7L0L7_ARALY); contains Interpro domain(s) IPR001841 Zinc finger, RING-type
Solyc10g047030.1.1	1	4	FM	Nbenth	Prec	Not prec	FALSE	TRUE			Beta-xylosidase 4 (AHRD V1 **** D7MRV5_ARALY); contains Interpro domain(s) IPR001764 Glycoside hydrolase, family 3, N-terminal
Solyc08g078940.1.1	1	4	FM	Nbenth	Prec	Not prec	FALSE	TRUE			Cortical cell-delineating protein (AHRD V1 **-- B6U436_MAIZE); contains Interpro domain(s) IPR013770 Plant lipid transfer protein and hydrophobic protein, helical
Solyc01g006390.2.1	1	4	FM	Nbenth	Prec	Not prec	FALSE	FALSE			Cysteine-rich extensin-like protein-4 (AHRD V1 *-*- Q08197_TOBAC)
Solyc04g010330.2.1	1	4	TM	Can	Not prec	Not prec	FALSE	TRUE			Auxin-regulated protein (AHRD V1 *-*- Q945F5_SOLLC); contains Interpro domain(s) IPR010369 Protein of unknown function DUF966
Solyc03g097920.1.1	1	4	TM	Can	Not prec	Not prec	FALSE	FALSE			Mitogen-activated protein kinase kinase (AHRD V1 **** D7NPU9_CAPAN); contains Interpro domain(s) IPR002290 Serine/threonine protein kinase
Solyc10g074870.1.1	1	4	TM	Can	Not prec	Not prec	FALSE	TRUE			KH domain containing RNA binding signal transduction associated 1 (AHRD V1 *--- Q29RQ2_BOVIN); contains Interpro domain(s) IPR004087 K Homology
Solyc03g112580.2.1	1	4	TM	Can	Not prec	Not prec	FALSE	TRUE			Receptor like kinase, RLK
Solyc09g097930.2.1	1	4	TM	Can	Not prec	Not prec	FALSE	TRUE			MazG nucleotide pyrophosphohydrolase (AHRD V1 ***- B1J275_PSEPW); contains Interpro domain(s) IPR004518 NTP pyrophosphohydrolase MazG, putative catalytic core
Solyc08g007690.1.1	1	4	TM	Can	Not prec	Not prec	FALSE	FALSE			Subtilisin-like protease (AHRD V1 **-- Q9LWA3_SOLLC); contains Interpro domain(s) IPR015500 Peptidase S8, subtilisin-related
Solyc07g053290.2.1	1	4	TM	Can	Not prec	Not prec	FALSE	TRUE	bHLH	GO:0003700	BHLH transcription factor (AHRD V1 *--* B4FMK3_MAIZE); contains Interpro domain(s) IPR001092 Basic helix-loop-helix dimerisation region bHLH
Solyc01g067540.1.1	1	4	TM	Can	Not prec	Not prec	FALSE	TRUE	ERF	GO:0003677_GO:0006355	Ethylene responsive transcription factor 12 (AHRD V1 *-*- C0J9I3_9ROSA); contains Interpro domain(s) IPR001471 Pathogenesis-related transcriptional factor and ERF, DNA-binding
Solyc07g063820.2.1	1	4	TM	Can	Not prec	Not prec	FALSE	FALSE			Serine/threonine-protein kinase receptor (AHRD V1 **** B6U2B7_MAIZE); contains Interpro domain(s) IPR002290 Serine/threonine protein kinase
Solyc04g076480.2.1	1	4	TM	Can	Not prec	Not prec	FALSE	TRUE			Serine/threonine-protein kinase B-raf (AHRD V1 *-** BRAF_COTJA); contains Interpro domain(s) IPR002290 Serine/threonine protein kinase
Solyc01g006660.1.1	1	4	TM	Can	Not prec	Not prec	FALSE	TRUE			Subtilisin-like serine protease (AHRD V1 **-* Q8LAE1_ARATH); contains Interpro domain(s) IPR015500 Peptidase S8, subtilisin-related
Solyc07g014670.2.1	1	4	TM	Can	Not prec	Not prec	FALSE	FALSE			Cytochrome P450
Solyc12g005040.1.1	1	4	TM	Can	Not prec	Not prec	FALSE	TRUE			Calcium-dependent protein kinase (AHRD V1 ***- Q9XER6_SOLTU); contains Interpro domain(s) IPR011992 EF-Hand type
Solyc03g063550.1.1	1	4	TM	Can	Not prec	Not prec	FALSE	TRUE			Unknown Protein (AHRD V1)
Solyc05g006010.2.1	1	4	TM	Can	Not prec	Not prec	FALSE	TRUE			Peptide transporter (AHRD V1 **-* A6YJX4_9MAGN); contains Interpro domain(s) IPR000109 TGF-beta receptor, type I/II extracellular region
Solyc03g112430.1.1	1	4	TM	Can	Not prec	Not prec	FALSE	TRUE	LBD		LOB domain protein 1 (AHRD V1 ***- B2KKZ3_ORYSJ); contains Interpro domain(s) IPR004883 Lateral organ boundaries, LOB
Solyc10g005060.2.1	1	4	TM	Can	Not prec	Not prec	FALSE	TRUE			O-methyltransferase-like protein (AHRD V1 **** D3JZ18_PRUMU); contains Interpro domain(s) IPR016461 O-methyltransferase, COMT, eukaryota
Solyc04g080970.2.1	1	4	TM	Can	Not prec	Not prec	FALSE	TRUE	SRS		Short internode related sequence 5 (AHRD V1 **-- D2KC76_BRARP); contains Interpro domain(s) IPR007818 Protein of unknown function DUF702
Solyc02g081230.2.1	1	4	TM	Can	Not prec	Not prec	FALSE	TRUE			Unknown Protein (AHRD V1)
Solyc10g079600.1.1	1	4	TM	Can	Not prec	Prec	FALSE	TRUE		GO:0006355	Response regulator 6 (AHRD V1 ***- Q9FRY9_MAIZE); contains Interpro domain(s) IPR001789 Signal transduction response regulator, receiver region
Solyc07g022830.2.1	1	4	TM	Can	Not prec	Prec	FALSE	FALSE			Xenotropic and polytropic retrovirus receptor (AHRD V1 **-- B2GU54_XENTR); contains Interpro domain(s) IPR004342 EXS, C-terminal
Solyc05g009770.1.1	1	4	TM	Can	Not prec	Prec	FALSE	TRUE	C2H2	GO:0003700	Zinc finger family protein (AHRD V1 ***- D7KQE1_ARALY); contains Interpro domain(s) IPR007087 Zinc finger, C2H2-type
Solyc04g080740.1.1	1	4	TM	Can	Not prec	Prec	FALSE	TRUE	bZIP		BZIP transcription factor family protein (AHRD V1 **-- D7KSN7_ARALY); contains Interpro domain(s) IPR011700 Basic leucine zipper
Solyc08g075430.2.1	1	4	TM	Can	Not prec	Prec	FALSE	FALSE			ABC transporter G family member 14 (AHRD V1 ***- AB14G_ARATH); contains Interpro domain(s) IPR013525 ABC-2 type transporter
Solyc06g074630.2.1	1	4	TM	Can	Not prec	Prec	FALSE	TRUE			Cellulose synthase-like C6 glycosyltransferase family 2 (AHRD V1 **-* A6N4C3_PHYPA); contains Interpro domain(s) IPR001173 Glycosyl transferase, family 2
Solyc02g089690.2.1	1	4	TM	Can	Not prec	Prec	FALSE	TRUE			Leaf senescence protein-like (AHRD V1 ***- Q8RV74_ORYSJ); contains Interpro domain(s) IPR004253 Protein of unknown function DUF231, plant
Solyc02g089210.2.1	1	4	TM	Can and Nbenth	Not prec	Not prec	FALSE	TRUE	MIKC		MADS box transcription factor (AHRD V1 ***- Q689E7_GENTR); contains Interpro domain(s) IPR002487 Transcription factor, K-box
Solyc12g049540.1.1	1	4	TM	Can and Nbenth	Not prec	Not prec	FALSE	TRUE			Polyphosphoinositide phosphatase (AHRD V1 ***- C0S4L1_PARBP); contains Interpro domain(s) IPR002013 Synaptojanin, N-terminal
Solyc02g089160.2.1	1	4	TM	Can and Nbenth	Not prec	Not prec	FALSE	TRUE			Cytochrome P450
Solyc10g078370.1.1	1	4	TM	Can and Nbenth	Not prec	Not prec	FALSE	TRUE			Auxin efflux carrier (AHRD V1 ***- D6RT09_SOLLC); contains Interpro domain(s) IPR014024 Auxin efflux carrier, subgroup
Solyc02g089620.2.1	1	4	TM	Can and Nbenth	Not prec	Not prec	FALSE	TRUE			Proline dehydrogenase (AHRD V1 **** A1E289_ACTDE); contains Interpro domain(s) IPR015659 Proline oxidase
Solyc01g010150.2.1	1	4	TM	Can and Nbenth	Not prec	Not prec	FALSE	TRUE			Unknown protein DS12 from 2D-PAGE of leaf, chloroplastic (AHRD V1 *--- UP12_ORYSJ); contains Interpro domain(s) IPR002912 Amino acid-binding ACT
Solyc10g075050.1.1	1	4	TM	Can and Nbenth	Not prec	Not prec	FALSE	TRUE			Non-specific lipid-transfer protein (AHRD V1 ***- A7UGG9_SOLTU); contains Interpro domain(s) IPR013770 Plant lipid transfer protein and hydrophobic protein, helical
Solyc07g007750.2.1	1	4	TM	Can and Nbenth	Not prec	Not prec	FALSE	TRUE			Defensin protein (AHRD V1 ***- B1N678_SOLLC); contains Interpro domain(s) IPR008177 Gamma Purothionin
Solyc02g092490.2.1	1	4	TM	Can and Nbenth	Not prec	Not prec	FALSE	TRUE			Acetyltransferase-like protein (AHRD V1 ***- Q7EYF5_ORYSJ); contains Interpro domain(s) IPR000182 GCN5-related N-acetyltransferase
Solyc01g065540.2.1	1	4	TM	Can and Nbenth	Not prec	Not prec	FALSE	TRUE	ARR-B	GO:0003700	Response regulator 8 (AHRD V1 *-*- Q9AV93_MAIZE); contains Interpro domain(s) IPR017053 Response regulator, plant B-type
Solyc02g088820.2.1	1	4	TM	Can and Nbenth	Not prec	Not prec	FALSE	TRUE			Serine carboxypeptidase K10B2.2 (AHRD V1 **** B6TSK4_MAIZE); contains Interpro domain(s) IPR001563 Peptidase S10, serine carboxypeptidase
Solyc01g096410.2.1	1	4	TM	Can and Nbenth	Not prec	Not prec	FALSE	TRUE			Phosphatidylinositol-4-phosphate 5-kinase family protein (AHRD V1 ***- D7L735_ARALY); contains Interpro domain(s) IPR017163 Phosphatidylinositol-4-phosphate 5-kinase, plant
Solyc02g077780.2.1	1	4	TM	Can and Nbenth	Not prec	Not prec	FALSE	TRUE			Necrotic spotted lesions 1 (Fragment) (AHRD V1 *-*- B6ZA38_HELPE); contains Interpro domain(s) IPR001862 Membrane attack complex component/perforin/complement C9
Solyc06g074000.1.1	1	4	TM	Can and Nbenth	Not prec	Prec	FALSE	FALSE			Aspartic proteinase nepenthesin-2 (AHRD V1 **-- B6SJT4_MAIZE); contains Interpro domain(s) IPR001461 Peptidase A1
Solyc04g008450.2.1	1	4	TM	Can and Nbenth	Not prec	Prec	FALSE	FALSE			Potassium transporter 17 (AHRD V1 **** B6T8T1_MAIZE); contains Interpro domain(s) IPR003855 K+ potassium transporter
Solyc02g063430.2.1	1	4	TM	Can and Nbenth	Not prec	Prec	FALSE	FALSE	bHLH	GO:0003700	BHLH transcription factor (AHRD V1 **** A9YWR2_MEDTR); contains Interpro domain(s) IPR011598 Helix-loop-helix DNA-binding
Solyc03g007240.2.1	1	4	TM	Can and Nbenth	Not prec	Prec	FALSE	FALSE			Spermidine synthase 1 (AHRD V1 **** B6TA19_MAIZE); contains Interpro domain(s) IPR001045 Spermine synthase
Solyc10g080930.1.1	1	4	TM	Can and Nbenth	Not prec	Prec	FALSE	TRUE			Transcription elongation factor A protein 2 (AHRD V1 *--- TCEA2_HUMAN); contains Interpro domain(s) IPR010990 Transcription elongation factor, TFIIS/elongin A/CRSP70, N-terminal
Solyc06g072430.1.1	1	4	TM	Can and Nbenth	Not prec	Prec	FALSE	TRUE			Bcl-2-associated athanogene-like protein (AHRD V1 *-*- D1MIX4_VITVI); contains Interpro domain(s) IPR003103 Apoptosis regulator Bcl-2 protein, BAG
Solyc09g074970.2.1	1	4	TM	Can and Nbenth	Not prec	Prec	FALSE	TRUE			Thiamin pyrophosphokinase 1 (AHRD V1 **** B6SUI9_MAIZE); contains Interpro domain(s) IPR016966 Thiamin pyrophosphokinase, eukaryotic
Solyc03g019950.2.1	1	4	TM	Can and Nbenth	Prec	Not prec	FALSE	TRUE			Genomic DNA chromosome 5 P1 clone MAC12 (AHRD V1 **-- Q9FFX3_ARATH); contains Interpro domain(s) IPR004328 BRO1
Solyc02g072310.2.1	1	4	TM	Can and Nbenth	Prec	Not prec	FALSE	TRUE			Receptor like kinase, RLK
Solyc01g098240.1.1	1	4	TM	Can and Nbenth	Prec	Not prec	FALSE	FALSE			RNA polymerase Rpb1 C-terminal repeat domain-containing protein (AHRD V1 *--- C5GU31_AJEDR); contains Interpro domain(s) IPR012474 Frigida-like
Solyc04g080580.2.1	1	4	TM	Can and Nbenth	Prec	Not prec	FALSE	TRUE			Kinase PfkB family (AHRD V1 **** D4WID3_BACOV); contains Interpro domain(s) IPR011611 Carbohydrate/purine kinase
Solyc10g076790.1.1	1	4	TM	Can and Nbenth	Prec	Not prec	FALSE	TRUE			Auxin transporter-like protein 1 (AHRD V1 **** B6U1Y3_MAIZE); contains Interpro domain(s) IPR013057 Amino acid transporter, transmembrane
Solyc03g026040.2.1	1	4	TM	Can and Nbenth	Prec	Not prec	FALSE	TRUE			Receptor like kinase, RLK
Solyc04g078460.2.1	1	4	TM	Can and Nbenth	Prec	Not prec	FALSE	TRUE			N(4)-(Beta-N-acetylglucosaminyl)-L-asparaginase (AHRD V1 **** ASPG_ELIMR); contains Interpro domain(s) IPR000246 Peptidase T2, asparaginase 2
Solyc05g006550.2.1	1	4	TM	Can and Nbenth	Prec	Not prec	FALSE	TRUE			Microtubule-associated protein TORTIFOLIA1 (AHRD V1 *--- B6SS76_MAIZE); contains Interpro domain(s) IPR011989 Armadillo-like helical
Solyc01g010130.2.1	1	4	TM	Can and Nbenth	Prec	Not prec	FALSE	TRUE	bHLH	GO:0003700	Transcription factor (AHRD V1 *-** D6MKM4_9ASPA); contains Interpro domain(s) IPR011598 Helix-loop-helix DNA-binding
Solyc01g098500.2.1	1	4	TM	Can and Nbenth	Prec	Not prec	FALSE	FALSE			Glucose transporter 8 (AHRD V1 ***- Q2KKJ3_SOLIN); contains Interpro domain(s) IPR003663 Sugar/inositol transporter
Solyc09g025280.1.1	1	4	TM	Can and Nbenth	Prec	Not prec	FALSE	FALSE			Light-dependent short hypocotyls 1 (AHRD V1 ***- D7M6V0_ARALY); contains Interpro domain(s) IPR006936 Protein of unknown function DUF640
Solyc06g062790.2.1	1	4	TM	Can and Nbenth	Prec	Not prec	FALSE	TRUE			Casein kinase I-like (AHRD V1 ***- Q8LR51_ORYSJ); contains Interpro domain(s) IPR002290 Serine/threonine protein kinase
Solyc09g005690.2.1	1	4	TM	Can and Nbenth	Prec	Not prec	FALSE	TRUE			Inositol-1 4 5-trisphosphate 5-Phosphatase-like protein (AHRD V1 ***- Q9M1W5_ARATH); contains Interpro domain(s) IPR000300 Inositol polyphosphate related phosphatase
Solyc06g066340.2.1	1	4	TM	Can and Nbenth	Prec	Not prec	FALSE	TRUE	G2-like		Myb family transcription factor-like protein (AHRD V1 *--- Q84UP8_ORYSJ); contains Interpro domain(s) IPR006447 Myb-like DNA-binding region, SHAQKYF class
Solyc04g015970.2.1	1	4	TM	Can and Nbenth	Prec	Not prec	FALSE	TRUE			ATP-binding cassette 1 (AHRD V1 *-*- Q80ZB2_RAT); contains Interpro domain(s) IPR003439 ABC transporter-like
Solyc01g005300.2.1	1	4	TM	Can and Nbenth	Prec	Not prec	FALSE	TRUE			Flavin-binding kelch domain F box protein (AHRD V1 **-* D7KVS5_ARALY); contains Interpro domain(s) IPR015915 Kelch-type beta propeller
Solyc04g078110.1.1	1	4	TM	Can and Nbenth	Prec	Not prec	FALSE	TRUE			Subtilisin-like protease (AHRD V1 **-- A9XG40_TOBAC); contains Interpro domain(s) IPR015500 Peptidase S8, subtilisin-related
Solyc08g077010.1.1	1	4	TM	Can and Nbenth	Prec	Not prec	FALSE	TRUE			AT-hook DNA-binding protein (Fragment) (AHRD V1 *--* A1DR79_CATRO); contains Interpro domain(s) IPR014476 Predicted AT-hook DNA-binding
Solyc04g080820.2.1	1	4	TM	Can and Nbenth	Prec	Not prec	FALSE	TRUE			Cytokinin oxidase/dehydrogenase (AHRD V1 **** C3VPM7_SOLTU); contains Interpro domain(s) IPR015345 Cytokinin dehydrogenase 1, FAD and cytokinin binding
Solyc06g065100.2.1	1	4	TM	Can and Nbenth	Prec	Not prec	FALSE	TRUE	MYB	GO:0003700	Myb-like transcription factor 1 (AHRD V1 **** Q8H271_GOSHI); contains Interpro domain(s) IPR015495 Myb transcription factor
Solyc12g008640.1.1	1	4	TM	Can and Nbenth	Prec	Not prec	FALSE	TRUE			Gamma-glutamyltransferase-like protein (AHRD V1 ***- Q9M0G0_ARATH); contains Interpro domain(s) IPR000101 Gamma-glutamyltranspeptidase
Solyc08g074390.2.1	1	4	TM	Can and Nbenth	Prec	Not prec	FALSE	TRUE			Glucan endo-1 3-beta-glucosidase 6 (AHRD V1 ***- B6TW83_MAIZE); contains Interpro domain(s) IPR013781 Glycoside hydrolase, subgroup, catalytic core
Solyc11g064800.1.1	1	4	TM	Can and Nbenth	Prec	Not prec	FALSE	TRUE	SRS		Stylish (AHRD V1 *--- D2KC71_BRARP); contains Interpro domain(s) IPR007818 Protein of unknown function DUF702
Solyc08g079030.2.1	1	4	TM	Can and Nbenth	Prec	Not prec	FALSE	TRUE			Unknown Protein (AHRD V1); contains Interpro domain(s) IPR008581 Protein of unknown function DUF863, plant
Solyc03g006240.2.1	1	4	TM	Can and Nbenth	Prec	Not prec	FALSE	FALSE			GDSL esterase/lipase At5g45910 (AHRD V1 ***- GDL83_ARATH); contains Interpro domain(s) IPR001087 Lipase, GDSL
Solyc04g077480.2.1	1	4	TM	Can and Nbenth	Prec	Not prec	FALSE	TRUE	bHLH	GO:0003700	Transcription factor (AHRD V1 *-** D6MKM4_9ASPA); contains Interpro domain(s) IPR011598 Helix-loop-helix DNA-binding
Solyc01g009860.2.1	1	4	TM	Can and Nbenth	Prec	Not prec	FALSE	FALSE	NAC	GO:0003700	NAC domain transcription factor (AHRD V1 **** Q5DM36_WHEAT); contains Interpro domain(s) IPR003441 No apical meristem (NAM) protein
Solyc02g084960.1.1	1	4	TM	Can and Nbenth	Prec	Not prec	FALSE	TRUE			Genomic DNA chromosome 5 TAC clone K1F13 (AHRD V1 ***- Q9FJZ5_ARATH)
Solyc03g115770.2.1	1	4	TM	Can and Nbenth	Prec	Not prec	FALSE	TRUE			Timing of CAB expression-like
Solyc09g010230.1.1	1	4	TM	Can and Nbenth	Prec	Not prec	FALSE	TRUE	B3	GO:0003700	Auxin response factor 24 (AHRD V1 *-** D9HNV1_MAIZE); contains Interpro domain(s) IPR003340 Transcriptional factor B3
Solyc08g080460.1.1	1	4	TM	Can and Nbenth	Prec	Not prec	FALSE	TRUE			Serine/threonine protein kinase (AHRD V1 *-** C4PKQ3_PRUPE); contains Interpro domain(s) IPR002290 Serine/threonine protein kinase
Solyc09g098420.1.1	1	4	TM	Can and Nbenth	Prec	Not prec	FALSE	TRUE			Receptor like kinase, RLK
Solyc03g121270.2.1	1	4	TM	Can and Nbenth	Prec	Not prec	FALSE	FALSE			IAA-amino acid hydrolase (AHRD V1 **** D5FTH2_POPTO); contains Interpro domain(s) IPR017439 Peptidase M20D, mername-AA028/carboxypeptidase Ss1
Solyc08g079650.2.1	1	4	TM	Can and Nbenth	Prec	Not prec	FALSE	TRUE			ACT domain containing protein expressed (AHRD V1 **-- Q10P43_ORYSJ); contains Interpro domain(s) IPR002912 Amino acid-binding ACT
Solyc06g083370.2.1	1	4	TM	Can and Nbenth	Prec	Not prec	FALSE	FALSE			Os01g0917200 protein (Fragment) (AHRD V1 ***- Q0JGL5_ORYSJ); contains Interpro domain(s) IPR009003 Peptidase, trypsin-like serine and cysteine
Solyc06g054250.2.1	1	4	TM	Can and Nbenth	Prec	Prec	TRUE	TRUE			5&apos-nucleotidase surE (AHRD V1 ***- D6YVT2_WADCW); contains Interpro domain(s) IPR002828 Survival protein SurE-like phosphatase/nucleotidase
Solyc12g005030.1.1	1	4	TM	Can and Nbenth	Prec	Prec	TRUE	FALSE			Calcium-dependent protein kinase (AHRD V1 ***- Q9XER6_SOLTU); contains Interpro domain(s) IPR002290 Serine/threonine protein kinase
Solyc03g117100.2.1	1	4	TM	Can and Nbenth	Prec	Prec	TRUE	TRUE			PPPDE peptidase domain-containing protein 1 (AHRD V1 *--- PPDE1_DANRE); contains Interpro domain(s) IPR008580 Protein of unknown function DUF862, eukaryotic
Solyc09g075350.2.1	1	4	TM	Can and Nbenth	Prec	Prec	TRUE	FALSE			Pectinesterase (AHRD V1 ***- B9SAU4_RICCO); contains Interpro domain(s) IPR000070 Pectinesterase, catalytic
Solyc01g109880.2.1	1	4	TM	Can and Nbenth	Prec	Prec	TRUE	TRUE	bZIP	GO:0003677	BZIP transcription factor (AHRD V1 ***- C0KYN1_SOLLC); contains Interpro domain(s) IPR011700 Basic leucine zipper
Solyc11g071470.1.1	1	4	TM	Can and Nbenth	Prec	Prec	TRUE	TRUE			Hydroxycinnamoyl CoA shikimate/quinate hydroxycinnamoyltransferase-like protein (Fragment) (AHRD V1 **-- B9GF60_POPTR); contains Interpro domain(s) IPR003480 Transferase
Solyc01g005560.2.1	1	4	TM	Can and Nbenth	Prec	Prec	TRUE	TRUE			Isocitrate dehydrogenase (AHRD V1 ***- D2D324_GOSHI); contains Interpro domain(s) IPR004790 Isocitrate dehydrogenase NADP-dependent, eukaryotic
Solyc01g099290.2.1	1	4	TM	Can and Nbenth	Prec	Prec	TRUE	FALSE			Cullin-like protein1 (AHRD V1 ***- Q8LP18_PEA); contains Interpro domain(s) IPR016159 Cullin repeat-like
Solyc04g076790.2.1	1	4	TM	Can and Nbenth	Prec	Prec	TRUE	TRUE			Serine hydroxymethyltransferase (AHRD V1 **** B9SMX7_RICCO); contains Interpro domain(s) IPR001085 Serine hydroxymethyltransferase
Solyc11g069030.1.1	1	4	TM	Can and Nbenth	Prec	Prec	TRUE	TRUE	MYB	GO:0003677	MYB transcription factor (AHRD V1 *--- Q9T066_ARATH); contains Interpro domain(s) IPR017930 Myb-type HTH DNA-binding domain
Solyc06g071180.2.1	1	4	TM	Can and Nbenth	Prec	Prec	TRUE	FALSE			Dynein light chain 1 cytoplasmic (AHRD V1 *-*- Q7RN10_PLAYO); contains Interpro domain(s) IPR001372 Dynein light chain, type 1 and 2
Solyc08g005240.1.1	1	4	TM	Can and Nbenth	Prec	Prec	TRUE	TRUE			Lysine-specific demethylase 5B (AHRD V1 *--* KDM5B_HUMAN); contains Interpro domain(s) IPR013129 Transcription factor jumonji
Solyc12g010180.1.1	1	4	TM	Can and Nbenth	Prec	Prec	TRUE	TRUE			Anthranilate synthase (AHRD V1 ***- A1KAT4_AZOSB); contains Interpro domain(s) IPR000991 Glutamine amidotransferase class-I, C-terminal
Solyc09g011750.2.1	1	4	TM	Can and Nbenth	Prec	Prec	TRUE	TRUE			Receptor-like protein kinase At5g59670 (AHRD V1 *-*- RLK7_ARATH); contains Interpro domain(s) IPR002290 Serine/threonine protein kinase
Solyc08g079020.2.1	1	4	TM	Can and Nbenth	Prec	Prec	TRUE	TRUE			Adenine phosphoribosyltransferase-like protein (AHRD V1 **** Q8LG17_ARATH); contains Interpro domain(s) IPR005764 Adenine phosphoribosyl transferase
Solyc03g097530.2.1	1	4	TM	Nbenth	Not prec	Not prec	FALSE	TRUE			TPD1 (AHRD V1 ***- Q6TLJ2_ARATH)
Solyc12g094520.1.1	1	4	TM	Nbenth	Not prec	Not prec	FALSE	TRUE			4-coumarate-coa ligase (AHRD V1 ***- B9MY03_POPTR); contains Interpro domain(s) IPR000873 AMP-dependent synthetase and ligase
Solyc04g010320.1.1	1	4	TM	Nbenth	Not prec	Not prec	FALSE	TRUE			Cytochrome P450
Solyc09g090760.2.1	1	4	TM	Nbenth	Not prec	Not prec	FALSE	TRUE			Folate/biopterin transporter family protein (AHRD V1 *-*- B6TYM7_MAIZE); contains Interpro domain(s) IPR004324 Biopterin transport-related protein BT1
Solyc10g082020.1.1	1	4	TM	Nbenth	Not prec	Not prec	FALSE	TRUE			Cytokinin riboside 5&apos;-monophosphate phosphoribohydrolase LOG (AHRD V1 **-- LOG_ORYSJ); contains Interpro domain(s) IPR005269 Conserved hypothetical protein CHP00730
Solyc06g053830.2.1	1	4	TM	Nbenth	Not prec	Not prec	FALSE	TRUE		GO:0003700	Auxin responsive protein (AHRD V1 ***- D9IQE6_CATRO); contains Interpro domain(s) IPR003311 AUX/IAA protein
Solyc08g008360.2.1	1	4	TM	Nbenth	Not prec	Not prec	FALSE	TRUE			Unknown Protein (AHRD V1)
Solyc04g074700.2.1	1	4	TM	Nbenth	Not prec	Not prec	FALSE	TRUE	HD-ZIP	GO:0006355	Homeobox-leucine zipper protein (AHRD V1 *-*- Q9FXN8_ZINEL); contains Interpro domain(s) IPR003106 Leucine zipper, homeobox-associated
Solyc02g093040.2.1	1	4	TM	Nbenth	Not prec	Not prec	FALSE	TRUE			Cathepsin B-like cysteine proteinase (AHRD V1 **-* CYSP_SCHMA); contains Interpro domain(s) IPR013128 Peptidase C1A, papain
Solyc04g051540.2.1	1	4	TM	Nbenth	Prec	Not prec	FALSE	TRUE	WRKY		WRKY family transcription factor (AHRD V1 *-*- D7LBR5_ARALY); contains Interpro domain(s) IPR003657 DNA-binding WRKY
Solyc03g122190.2.1	1	4	TM	Nbenth	Prec	Not prec	FALSE	TRUE			Jasmonate ZIM domain 2 (AHRD V1 **-- C7SCY2_CATRO); contains Interpro domain(s) IPR010399 Tify
Solyc08g080210.2.1	1	4	TM	Nbenth	Prec	Not prec	FALSE	FALSE			DNA-directed RNA polymerase (AHRD V1 ***- B9GKP9_POPTR); contains Interpro domain(s) IPR000722 RNA polymerase, alpha subunit
Solyc08g080520.2.1	1	4	TM	Nbenth	Prec	Not prec	FALSE	TRUE			AT5g06970/MOJ9_14 (AHRD V1 **-- Q8RX56_ARATH); contains Interpro domain(s) IPR008528 Protein of unknown function DUF810
Solyc07g065540.1.1	1	4	TM	Nbenth	Prec	Not prec	FALSE	TRUE			Fasciclin-like arabinogalactan protein 10 (AHRD V1 ***- A9XTL5_GOSHI); contains Interpro domain(s) IPR000782 FAS1 domain
Solyc11g032130.1.1	1	4	TM	Nbenth	Prec	Not prec	FALSE	FALSE			NADPH dehydrogenase 3 (AHRD V1 **-* OYE3_YEAST); contains Interpro domain(s) IPR001155 NADH:flavin oxidoreductase/NADH oxidase, N-terminal
Solyc01g088660.2.1	1	4	TM	Nbenth	Prec	Not prec	FALSE	TRUE			Os04g0585900 protein (Fragment) (AHRD V1 *-*- Q0JAP2_ORYSJ); contains Interpro domain(s) IPR007650 Protein of unknown function DUF581
Solyc04g071990.2.1	1	4	TM	Nbenth	Prec	Not prec	FALSE	TRUE			Tomato GIGANTEA 1
Solyc07g042270.2.1	1	4	TM	Nbenth	Prec	Not prec	FALSE	FALSE			ATP-dependent RNA helicase (AHRD V1 **** C6LZE8_GIALA); contains Interpro domain(s) IPR011545 DNA/RNA helicase, DEAD/DEAH box type, N-terminal
Solyc07g043310.2.1	1	4	TM	Nbenth	Prec	Not prec	FALSE	FALSE			Aminotransferase (AHRD V1 ***- D2KZ08_WHEAT); contains Interpro domain(s) IPR005814 Aminotransferase class-III
Solyc07g042550.2.1	1	4	TM	Nbenth	Prec	Not prec	FALSE	TRUE			Sucrose synthase (AHRD V1 **** O82691_SOLLC); contains Interpro domain(s) IPR012820 Sucrose synthase, plants and cyanobacteria IPR000368 Sucrose synthase
Solyc01g080960.2.1	1	4	TM	Nbenth	Prec	Not prec	FALSE	TRUE			AT-hook DNA-binding protein (Fragment) (AHRD V1 *--* A1DR79_CATRO); contains Interpro domain(s) IPR014476 Predicted AT-hook DNA-binding
Solyc03g006590.2.1	1	4	TM	Nbenth	Prec	Not prec	FALSE	TRUE			Unknown Protein (AHRD V1)
Solyc09g042660.2.1	1	4	TM	Nbenth	Prec	Not prec	FALSE	TRUE			CBL-interacting protein kinase 22 (AHRD V1 **** A0MNK8_POPTR); contains Interpro domain(s) IPR002290 Serine/threonine protein kinase
Solyc04g014360.2.1	1	4	TM	Nbenth	Prec	Not prec	FALSE	TRUE	bHLH	GO:0003700	Transcription factor SPATULA (AHRD V1 *-** SPT_ARATH); contains Interpro domain(s) IPR001092 Basic helix-loop-helix dimerisation region bHLH
Solyc08g008310.2.1	1	4	TM	Nbenth	Prec	Not prec	FALSE	TRUE			Long-chain-fatty-acid-CoA ligase (AHRD V1 **** B2WS80_ARAHA); contains Interpro domain(s) IPR000873 AMP-dependent synthetase and ligase
Solyc12g008530.1.1	1	4	TM	Nbenth	Prec	Not prec	FALSE	TRUE			Pectinesterase (AHRD V1 ***- B9RKG6_RICCO); contains Interpro domain(s) IPR000070 Pectinesterase, catalytic
Solyc07g006500.2.1	1	5	FM	Can	Not prec	Not prec	FALSE	FALSE			Alpha alpha-trehalose-phosphate synthase (UDP-forming) (AHRD V1 **** D2REU5_ARCPA); contains Interpro domain(s) IPR001830 Glycosyl transferase, family 20
Solyc08g075940.2.1	1	5	FM	Can	Not prec	Not prec	FALSE	FALSE			DNA-directed RNA polymerase (AHRD V1 ***- B9IL57_POPTR); contains Interpro domain(s) IPR015712 DNA-directed RNA polymerase, subunit 2
Solyc08g083050.1.1	1	5	FM	Can	Not prec	Not prec	FALSE	TRUE			Unknown Protein (AHRD V1)
Solyc03g120870.2.1	1	5	FM	Can	Not prec	Not prec	FALSE	TRUE			UPF0497 membrane protein 14 (AHRD V1 ***- U497E_VITVI); contains Interpro domain(s) IPR006459 Uncharacterised protein family UPF0497, trans-membrane plant subgroup
Solyc07g052100.2.1	1	5	FM	Can	Not prec	Not prec	FALSE	TRUE			Chromodomain-helicase-DNA-binding protein 1-like (AHRD V1 *--* CHD1L_DANRE); contains Interpro domain(s) IPR014001 DEAD-like helicase, N-terminal
Solyc09g075420.2.1	1	5	FM	Can	Not prec	Not prec	FALSE	TRUE	ERF	GO:0003677	Ethylene responsive transcription factor 2b (AHRD V1 *-*- C0J9I6_9ROSA); contains Interpro domain(s) IPR001471 Pathogenesis-related transcriptional factor and ERF, DNA-binding IPR001711 Phospholipase C, phosphatidylinositol-specific, Y domain
Solyc03g117980.2.1	1	5	FM	Can	Not prec	Not prec	FALSE	TRUE			Respiratory burst oxidase-like protein (AHRD V1 **** C1IHQ9_9ROSI); contains Interpro domain(s) IPR013121 Ferric reductase, NAD binding
Solyc05g055400.2.1	1	5	FM	Can	Not prec	Not prec	FALSE	TRUE			Cytochrome P450
Solyc04g054990.2.1	1	5	FM	Can	Not prec	Not prec	FALSE	FALSE			Lipoxygenase homology domain-containing protein 1 (AHRD V1 *--- LOXH1_HUMAN); contains Interpro domain(s) IPR001024 Lipoxygenase, LH2
Solyc09g072630.2.1	1	5	FM	Can	Not prec	Not prec	FALSE	TRUE			LRR receptor-like serine/threonine-protein kinase, RLP
Solyc06g007180.2.1	1	5	FM	Can	Not prec	Not prec	FALSE	TRUE			Asparagine synthase (Glutamine-hydrolyzing) (AHRD V1 **** A9EDI4_9FLAO); contains Interpro domain(s) IPR006426 Asparagine synthase, glutamine-hydrolyzing
Solyc12g094450.1.1	1	5	FM	Can	Not prec	Prec	FALSE	TRUE			Peroxisomal multifunctional enzyme type 2 (AHRD V1 **-- B4FP93_MAIZE); contains Interpro domain(s) IPR002539 MaoC-like dehydratase
Solyc08g074480.1.1	1	5	FM	Can	Not prec	Prec	FALSE	TRUE			Cortical cell-delineating protein (AHRD V1 **-- B6UGA2_MAIZE); contains Interpro domain(s) IPR013770 Plant lipid transfer protein and hydrophobic protein, helical
Solyc09g090070.1.1	1	5	FM	Can	Not prec	Prec	FALSE	TRUE			Inorganic phosphate transporter (AHRD V1 **** O22548_SOLLC); contains Interpro domain(s) IPR004738 Phosphate permease
Solyc10g005210.2.1	1	5	FM	Can	Not prec	Prec	FALSE	TRUE			DNA-3-methyladenine glycosylase I (AHRD V1 ***- B4FWT0_MAIZE); contains Interpro domain(s) IPR005019 Methyladenine glycosylase
Solyc12g013700.1.1	1	5	FM	Can	Not prec	Prec	FALSE	FALSE			Aluminum-induced protein-like protein (AHRD V1 ***- Q8S2R9_THEHA)
Solyc07g063640.1.1	1	5	FM	Can	Not prec	Prec	FALSE	TRUE			Wound induced protein (AHRD V1 ***- B6SKC8_MAIZE)
Solyc03g006490.2.1	1	5	FM	Can	Not prec	Prec	FALSE	TRUE			Aluminum-induced protein-like (AHRD V1 ***- Q9FG81_ARATH)
Solyc05g005150.1.1	1	5	FM	Can	Not prec	Prec	FALSE	FALSE			F-box/Kelch repeat-containing F-box family protein (AHRD V1 ***- C4PVT9_ARATH); contains Interpro domain(s) IPR015915 Kelch-type beta propeller
Solyc06g083900.2.1	1	5	FM	Can	Not prec	Prec	FALSE	FALSE	MYB	GO:0003700	Myb-related transcription factor (AHRD V1 **-* B2CZJ1_CAPAN); contains Interpro domain(s) IPR015495 Myb transcription factor
Solyc01g094870.1.1	1	5	FM	Can	Not prec	Prec	FALSE	FALSE			MRNA clone RAFL21-92-I07 (AHRD V1 *--- Q681W9_ARATH); contains Interpro domain(s) IPR006461 Protein of unknown function Cys-rich
Solyc03g112160.2.1	1	5	FM	Can	Not prec	Prec	FALSE	FALSE			Protein DEHYDRATION-INDUCED 19 homolog 5 (AHRD V1 ***- DI195_ORYSJ); contains Interpro domain(s) IPR008598 Drought induced 19
Solyc12g008400.1.1	1	5	FM	Can	Not prec	Prec	FALSE	FALSE			Receptor like kinase, RLK
Solyc04g007340.2.1	1	5	FM	Can	Not prec	Prec	FALSE	FALSE			Unknown Protein (AHRD V1); contains Interpro domain(s) IPR012438 Protein of unknown function DUF1639
Solyc08g078670.2.1	1	5	FM	Can	Not prec	Prec	FALSE	FALSE			Aspartyl protease (AHRD V1 **-- B8YIB7_MIRJA); contains Interpro domain(s) IPR001461 Peptidase A1
Solyc02g089200.2.1	1	5	FM	Can	Not prec	Prec	FALSE	TRUE	MIKC	GO:0003700	MADS-box transcription factor (AHRD V1 **** Q3KSZ0_PRUDU); contains Interpro domain(s) IPR002100 Transcription factor, MADS-box IPR002487 Transcription factor, K-box
Solyc03g111310.2.1	1	5	FM	Can	Not prec	Prec	FALSE	FALSE			AKIN gamma (AHRD V1 **-- Q7XYY0_MEDTR); contains Interpro domain(s) IPR000644 Cystathionine beta-synthase, core
Solyc10g086500.1.1	1	5	FM	Can	Not prec	Prec	FALSE	FALSE			3-oxo-5-alpha-steroid 4-dehydrogenase family protein expressed (AHRD V1 ***- Q53NE6_ORYSJ); contains Interpro domain(s) IPR016636 3-oxo-5-alpha-steroid 4-dehydrogenase IPR001104 3-oxo-5-alpha-steroid 4-dehydrogenase, C-terminal
Solyc04g082030.1.1	1	5	FM	Can	Not prec	Prec	FALSE	FALSE			Ornithine decarboxylase (AHRD V1 **** Q9SXF3_TOBAC); contains Interpro domain(s) IPR002433 Ornithine decarboxylase
Solyc02g087510.2.1	1	5	FM	Can	Not prec	Prec	FALSE	TRUE			Ribosomal protein S6 kinase alpha-2 (AHRD V1 *-** KS6A2_HUMAN); contains Interpro domain(s) IPR002290 Serine/threonine protein kinase
Solyc04g072030.1.1	1	5	FM	Can	Not prec	Prec	FALSE	FALSE			Interferon-induced GTP-binding protein Mx (Fragment) (AHRD V1 *--- MX_PERFL); contains Interpro domain(s) IPR015577 Interferon-induced Mx protein
Solyc04g076630.2.1	1	5	FM	Can	Not prec	Prec	FALSE	FALSE			Rhamnogalacturonate lyase (AHRD V1 **** A3XLZ2_LEEBM); contains Interpro domain(s) IPR010325 Rhamnogalacturonate lyase
Solyc03g033330.2.1	1	5	FM	Can	Not prec	Prec	FALSE	FALSE			RING finger protein 44 (AHRD V1 *-*- RNF44_MOUSE); contains Interpro domain(s) IPR018957 Zinc finger, C3HC4 RING-type
Solyc02g065290.1.1	1	5	FM	Can	Not prec	Prec	FALSE	FALSE	Dof	GO:0003700	Dof zinc finger protein 6 (AHRD V1 *-*- A5HWF5_HORVD); contains Interpro domain(s) IPR003851 Zinc finger, Dof-type
Solyc06g068550.2.1	1	5	FM	Can	Not prec	Prec	FALSE	FALSE			Aspartic proteinase nepenthesin-1 (AHRD V1 **-- C0JAB4_ORYCO); contains Interpro domain(s) IPR001461 Peptidase A1
Solyc03g115870.2.1	1	5	FM	Can	Not prec	Prec	FALSE	TRUE			Thioredoxin 2 (AHRD V1 ***- Q5ZF47_PLAMJ); contains Interpro domain(s) IPR015467 Thioredoxin, core
Solyc11g066130.1.1	1	5	FM	Can and Nbenth	Not prec	Not prec	FALSE	FALSE			Thaumatin-like protein (AHRD V1 **-- D2KU75_CITJA); contains Interpro domain(s) IPR017949 Thaumatin, conserved site IPR001938 Thaumatin, pathogenesis-related
Solyc12g006860.1.1	1	5	FM	Can and Nbenth	Not prec	Not prec	FALSE	TRUE			Cytochrome P450
Solyc04g074080.2.1	1	5	FM	Can and Nbenth	Not prec	Not prec	FALSE	FALSE			WW domain containing protein expressed (AHRD V1 *-*- Q2QVE4_ORYSJ); contains Interpro domain(s) IPR001202 WW/Rsp5/WWP
Solyc02g079190.2.1	1	5	FM	Can and Nbenth	Not prec	Not prec	FALSE	TRUE			Auxin F-box protein 5 (AHRD V1 **-- D7MPH1_ARALY); contains Interpro domain(s) IPR001810 Cyclin-like F-box
Solyc09g009260.2.1	1	5	FM	Can and Nbenth	Not prec	Not prec	FALSE	TRUE			Fructose-bisphosphate aldolase (AHRD V1 ***- Q2PYX3_SOLTU); contains Interpro domain(s) IPR000741 Fructose-bisphosphate aldolase, class-I
Solyc12g005990.1.1	1	5	FM	Can and Nbenth	Not prec	Not prec	FALSE	TRUE			Dual specificity protein phosphatase 4 (AHRD V1 ***- B6U4B9_MAIZE); contains Interpro domain(s) IPR020422 Dual specificity phosphatase, subgroup, catalytic domain
Solyc06g053480.2.1	1	5	FM	Can and Nbenth	Not prec	Not prec	FALSE	TRUE			Stearoyl-acyl carrier protein desaturase (AHRD V1 **** B7TZ44_SPIOL); contains Interpro domain(s) IPR005067 Fatty acid desaturase, type 2
Solyc01g090460.2.1	1	5	FM	Can and Nbenth	Not prec	Not prec	FALSE	FALSE	HD-ZIP		Homeobox-leucine zipper protein (AHRD V1 *-*- Q39862_SOYBN); contains Interpro domain(s) IPR001356 Homeobox IPR017970 Homeobox, conserved site
Solyc07g062820.1.1	1	5	FM	Can and Nbenth	Not prec	Not prec	FALSE	TRUE			Pentatricopeptide repeat protein PPR1106-17 (AHRD V1 ***- B6SWY6_MAIZE); contains Interpro domain(s) IPR002885 Pentatricopeptide repeat
Solyc11g016970.1.1	1	5	FM	Can and Nbenth	Not prec	Not prec	FALSE	FALSE			Multidrug resistance protein mdtK (AHRD V1 *-*- MDTK_ENTS8); contains Interpro domain(s) IPR002528 Multi antimicrobial extrusion protein MatE
Solyc01g099910.2.1	1	5	FM	Can and Nbenth	Not prec	Not prec	FALSE	TRUE			Epoxide hydrolase (AHRD V1 ***- B3VMR4_NICBE); contains Interpro domain(s) IPR000639 Epoxide hydrolase-like
Solyc03g114460.2.1	1	5	FM	Can and Nbenth	Not prec	Not prec	FALSE	TRUE			Acetyl-coenzyme A synthetase (AHRD V1 ***- D5HA95_SALRM); contains Interpro domain(s) IPR000873 AMP-dependent synthetase and ligase
Solyc02g087620.2.1	1	5	FM	Can and Nbenth	Not prec	Not prec	FALSE	TRUE			Inositol hexakisphosphate and diphosphoinositol-pentakisphosphate kinase 2 (AHRD V1 **-* VIP2_MOUSE); contains Interpro domain(s) IPR000560 Histidine acid phosphatase
Solyc11g009050.1.1	1	5	FM	Can and Nbenth	Not prec	Not prec	FALSE	TRUE			F-box protein-like (AHRD V1 ***- Q67X80_ORYSJ); contains Interpro domain(s) IPR001810 Cyclin-like F-box
Solyc01g102470.2.1	1	5	FM	Can and Nbenth	Not prec	Not prec	FALSE	FALSE			Pentatricopeptide repeat-containing protein (AHRD V1 *-*- D7MEW5_ARALY); contains Interpro domain(s) IPR002885 Pentatricopeptide repeat
Solyc03g123610.2.1	1	5	FM	Can and Nbenth	Not prec	Not prec	FALSE	TRUE			Alanine aminotransferase (AHRD V1 ***- Q6VEJ5_CAPAN); contains Interpro domain(s) IPR004839 Aminotransferase, class I and II
Solyc10g076510.1.1	1	5	FM	Can and Nbenth	Not prec	Not prec	FALSE	TRUE			Pyruvate decarboxylase (AHRD V1 **** B0ZS79_PRUAR); contains Interpro domain(s) IPR012110 Pyruvate decarboxylase/indolepyruvate decarboxylase
Solyc01g107980.2.1	1	5	FM	Can and Nbenth	Not prec	Not prec	FALSE	TRUE			U-box domain-containing protein (AHRD V1 ***- A8IXJ0_BRACM); contains Interpro domain(s) IPR011989 Armadillo-like helical
Solyc01g111880.2.1	1	5	FM	Can and Nbenth	Not prec	Not prec	FALSE	TRUE			Tyrosine-protein kinase transforming protein Src (AHRD V1 *-** SRC_AVIST); contains Interpro domain(s) IPR015783 ATMRK serine/threonine protein kinase-like
Solyc06g048410.2.1	1	5	FM	Can and Nbenth	Not prec	Not prec	FALSE	TRUE			Superoxide dismutase (AHRD V1 **** Q7YK44_SOLLC); contains Interpro domain(s) IPR019833 Manganese/iron superoxide dismutase, binding site IPR001189 Manganese/iron superoxide dismutase
Solyc01g010970.2.1	1	5	FM	Can and Nbenth	Not prec	Not prec	FALSE	FALSE			ARGONAUTE 1 (AHRD V1 ***- D6RUV9_TOBAC); contains Interpro domain(s) IPR003165 Stem cell self-renewal protein Piwi
Solyc08g074630.1.1	1	5	FM	Can and Nbenth	Not prec	Not prec	FALSE	FALSE			Polyphenol oxidase (AHRD V1 ***- Q41428_SOLTU); contains Interpro domain(s) IPR016213 Polyphenol oxidase, plant
Solyc02g068410.1.1	1	5	FM	Can and Nbenth	Not prec	Not prec	FALSE	FALSE			AT4G20050-like protein (Fragment) (AHRD V1 *-*- D6PQZ2_9BRAS); contains Interpro domain(s) IPR011050 Pectin lyase fold/virulence factor
Solyc08g063040.2.1	1	5	FM	Can and Nbenth	Not prec	Not prec	FALSE	TRUE	C2H2		Zinc finger protein (AHRD V1 *-*- Q9LVQ7_ARATH); contains Interpro domain(s) IPR007087 Zinc finger, C2H2-type
Solyc11g071480.1.1	1	5	FM	Can and Nbenth	Not prec	Not prec	FALSE	TRUE			Hydroxycinnamoyl CoA shikimate/quinate hydroxycinnamoyltransferase-like protein (Fragment) (AHRD V1 **-- B9GF60_POPTR); contains Interpro domain(s) IPR003480 Transferase
Solyc04g078540.2.1	1	5	FM	Can and Nbenth	Not prec	Prec	FALSE	FALSE			Cathepsin B-like cysteine proteinase (AHRD V1 **-* CYSP_SCHMA); contains Interpro domain(s) IPR013128 Peptidase C1A, papain
Solyc07g063940.1.1	1	5	FM	Can and Nbenth	Not prec	Prec	FALSE	FALSE	GRAS	GO:0003700	GRAS family transcription factor (AHRD V1 **-* B9I7E1_POPTR); contains Interpro domain(s) IPR005202 GRAS transcription factor
Solyc08g083210.2.1	1	5	FM	Can and Nbenth	Not prec	Prec	FALSE	TRUE			Endoglucanase 1 (AHRD V1 ***- B6U0P7_MAIZE); contains Interpro domain(s) IPR001701 Glycoside hydrolase, family 9
Solyc04g080290.2.1	1	5	FM	Can and Nbenth	Not prec	Prec	FALSE	FALSE			CRAL/TRIO domain containing protein expressed (AHRD V1 **-- Q75GU9_ORYSJ); contains Interpro domain(s) IPR001251 Cellular retinaldehyde-binding/triple function, C-terminal
Solyc02g081120.2.1	1	5	FM	Can and Nbenth	Not prec	Prec	FALSE	TRUE	TALE		Knotted-1-like homeobox protein H1 (AHRD V1 ***- Q8GUS6_TOBAC); contains Interpro domain(s) IPR005541 KNOX2
Solyc02g081010.1.1	1	5	FM	Can and Nbenth	Not prec	Prec	FALSE	TRUE		GO:0003700	Transcription factor jumonji domain-containing protein (AHRD V1 **-* D7KN75_ARALY); contains Interpro domain(s) IPR013129 Transcription factor jumonji
Solyc04g071890.2.1	1	5	FM	Can and Nbenth	Not prec	Prec	FALSE	FALSE			Peroxidase 4 (AHRD V1 **** B7UCP4_LITCN); contains Interpro domain(s) IPR002016 Haem peroxidase, plant/fungal/bacterial
Solyc04g082880.2.1	1	5	FM	Can and Nbenth	Not prec	Prec	FALSE	TRUE			Diphosphate--fructose-6-phosphate 1-phosphotransferase (AHRD V1 ***- C8PT93_9SPIO); contains Interpro domain(s) IPR011183 Pyrophosphate-dependent phosphofructokinase PfpB
Solyc06g068540.2.1	1	5	FM	Can and Nbenth	Not prec	Prec	FALSE	FALSE			Transcription regulatory protein SNF5 (AHRD V1 *-*- D3B6R9_POLPA)
Solyc08g083230.1.1	1	5	FM	Can and Nbenth	Not prec	Prec	FALSE	FALSE	GRF		Growth-regulating factor 3 (AHRD V1 *--- Q6AWY6_ORYSJ); contains Interpro domain(s) IPR014977 WRC
Solyc07g042170.2.1	1	5	FM	Can and Nbenth	Not prec	Prec	FALSE	TRUE			Jasmonate ZIM-domain protein 3 (AHRD V1 **-- B3Y563_TOBAC); contains Interpro domain(s) IPR010399 Tify
Solyc01g006400.2.1	1	5	FM	Can and Nbenth	Not prec	Prec	FALSE	TRUE			Cysteine-rich extensin-like protein-4 (AHRD V1 *-*- Q08197_TOBAC)
Solyc02g088340.2.1	1	5	FM	Can and Nbenth	Not prec	Prec	FALSE	FALSE	WRKY	GO:0003700	WRKY transcription factor-c (AHRD V1 **** Q5DJV3_CAPAN); contains Interpro domain(s) IPR003657 DNA-binding WRKY
Solyc11g010710.1.1	1	5	FM	Can and Nbenth	Not prec	Prec	FALSE	FALSE	AP2	GO:0003677_GO:0006355	AP2-like ethylene-responsive transcription factor At1g16060 (AHRD V1 *-*- AP2L1_ARATH); contains Interpro domain(s) IPR001471 Pathogenesis-related transcriptional factor and ERF, DNA-binding
Solyc01g008110.2.1	1	5	FM	Can and Nbenth	Not prec	Prec	FALSE	TRUE			Cytochrome P450
Solyc08g076670.2.1	1	5	FM	Can and Nbenth	Not prec	Prec	FALSE	TRUE			Transmembrane protein 41B (AHRD V1 **-- TM41B_HUMAN); contains Interpro domain(s) IPR015414 SNARE associated Golgi protein
Solyc07g007330.1.1	1	5	FM	Can and Nbenth	Not prec	Prec	FALSE	FALSE			Serine-rich protein (AHRD V1 ***- A1YMW6_BRACM)
Solyc01g079480.2.1	1	5	FM	Can and Nbenth	Not prec	Prec	FALSE	TRUE	bZIP	GO:0003700	BZIP transcription factor (AHRD V1 **-* Q1HW69_CAPAN); contains Interpro domain(s) IPR011616 bZIP transcription factor, bZIP-1
Solyc02g086180.2.1	1	5	FM	Can and Nbenth	Not prec	Prec	FALSE	FALSE			Sterol C-5 desaturase (AHRD V1 **** D7FW86_ECTSI); contains Interpro domain(s) IPR006694 Fatty acid hydroxylase
Solyc01g110570.2.1	1	5	FM	Can and Nbenth	Not prec	Prec	FALSE	TRUE			Auxin-induced SAUR-like protein (AHRD V1 **-- Q8S349_CAPAN); contains Interpro domain(s) IPR003676 Auxin responsive SAUR protein
Solyc01g105280.2.1	1	5	FM	Can and Nbenth	Not prec	Prec	FALSE	FALSE			Protein phosphatase 2C-like (AHRD V1 ***- A2Q6E4_MEDTR); contains Interpro domain(s) IPR015655 Protein phosphatase 2C
Solyc01g096080.2.1	1	5	FM	Can and Nbenth	Not prec	Prec	FALSE	FALSE			Unknown Protein (AHRD V1)
Solyc01g096100.2.1	1	5	FM	Can and Nbenth	Not prec	Prec	FALSE	FALSE			AT2G46550 protein (Fragment) (AHRD V1 ***- B9DHY8_ARATH)
Solyc04g081240.2.1	1	5	FM	Can and Nbenth	Not prec	Prec	FALSE	FALSE	ARF		Auxin response factor 5 (AHRD V1 ***- D9IVB5_SOLLC); contains Interpro domain(s) IPR010525 Auxin response factor
Solyc04g050960.2.1	1	5	FM	Can and Nbenth	Not prec	Prec	FALSE	FALSE			Chromatin remodeling complex subunit (AHRD V1 *--- B9N3S4_POPTR); contains Interpro domain(s) IPR012287 Homeodomain-related
Solyc11g011310.1.1	1	5	FM	Can and Nbenth	Not prec	Prec	FALSE	TRUE			Rhamnogalacturonate lyase (AHRD V1 ***- A3XLZ2_LEEBM); contains Interpro domain(s) IPR010325 Rhamnogalacturonate lyase
Solyc06g073730.1.1	1	5	FM	Can and Nbenth	Not prec	Prec	FALSE	FALSE	EIL	GO:0003700	Ethylene insensitive 3 class transcription factor (AHRD V1 **** D5L146_MALDO); contains Interpro domain(s) IPR006957 Ethylene insensitive 3
Solyc01g110350.2.1	1	5	FM	Can and Nbenth	Not prec	Prec	FALSE	TRUE			Unknown Protein (AHRD V1)
Solyc02g063450.2.1	1	5	FM	Can and Nbenth	Not prec	Prec	FALSE	FALSE			Hypothetical YFW family protein 5 (AHRD V1 *--- Q5AP84_CANAL); contains Interpro domain(s) IPR009836 Protein of unknown function DUF1399
Solyc05g010590.2.1	1	5	FM	Can and Nbenth	Not prec	Prec	FALSE	TRUE			WPP domain-interacting tail-anchored protein 2 (AHRD V1 ***- WIT2_ARATH)
Solyc03g117600.2.1	1	5	FM	Can and Nbenth	Not prec	Prec	FALSE	FALSE			Hydroxycinnamoyl-CoA shikimate/quinate hydroxycinnamoyltransferase (AHRD V1 **-* A4ZKI0_COFAR); contains Interpro domain(s) IPR003480 Transferase
Solyc02g081830.2.1	1	5	FM	Can and Nbenth	Prec	Not prec	FALSE	TRUE			HAD-superfamily hydrolase (AHRD V1 ***- D5A3P4_SPIPL); contains Interpro domain(s) IPR011949 HAD-superfamily hydrolase, subfamily IA, REG-2-like
Solyc07g055210.2.1	1	5	FM	Can and Nbenth	Prec	Not prec	FALSE	TRUE			Aspartate aminotransferase (AHRD V1 ***- B9SW33_RICCO); contains Interpro domain(s) IPR000796 Aspartate/other aminotransferase
Solyc09g098290.2.1	1	5	FM	Can and Nbenth	Prec	Not prec	FALSE	TRUE			Receptor like kinase, RLK
Solyc04g076960.2.1	1	5	FM	Can and Nbenth	Prec	Not prec	FALSE	FALSE			Sucrose transporter (AHRD V1 **** Q9FVJ6_SOLLC); contains Interpro domain(s) IPR005989 Sucrose/H+ symporter, plant
Solyc04g015560.2.1	1	5	FM	Can and Nbenth	Prec	Not prec	FALSE	FALSE			Beta-D-glucosidase (AHRD V1 ***- Q7XAS3_GOSHI); contains Interpro domain(s) IPR001764 Glycoside hydrolase, family 3, N-terminal
Solyc04g009810.2.1	1	5	FM	Can and Nbenth	Prec	Not prec	FALSE	TRUE			Pelota homolog (AHRD V1 ***- C3KIY5_ANOFI); contains Interpro domain(s) IPR004405 Probable translation factor pelota
Solyc02g080220.2.1	1	5	FM	Can and Nbenth	Prec	Not prec	FALSE	TRUE			Pectinesterase (AHRD V1 ***- B9RXQ4_RICCO); contains Interpro domain(s) IPR000070 Pectinesterase, catalytic
Solyc11g010950.1.1	1	5	FM	Can and Nbenth	Prec	Not prec	FALSE	TRUE			Elongator complex protein 4 (AHRD V1 ***- ELP4_BOVIN); contains Interpro domain(s) IPR008728 Elongator complex protein 4
Solyc04g058180.2.1	1	5	FM	Can and Nbenth	Prec	Not prec	FALSE	TRUE			Dehydration-responsive family protein (AHRD V1 **-- D7LDR4_ARALY); contains Interpro domain(s) IPR004159 Protein of unknown function DUF248, methyltransferase putative
Solyc03g119530.2.1	1	5	FM	Can and Nbenth	Prec	Not prec	FALSE	FALSE	LBD		LOB domain protein 42 (AHRD V1 ***- D7KWD0_ARALY); contains Interpro domain(s) IPR004883 Lateral organ boundaries, LOB
Solyc11g012130.1.1	1	5	FM	Can and Nbenth	Prec	Not prec	FALSE	FALSE			Blue copper protein (AHRD V1 *--- B6U7P6_MAIZE); contains Interpro domain(s) IPR008972 Cupredoxin
Solyc04g049920.2.1	1	5	FM	Can and Nbenth	Prec	Not prec	FALSE	TRUE			RNA binding protein-like (AHRD V1 **-- Q8LFQ5_ARATH); contains Interpro domain(s) IPR000504 RNA recognition motif, RNP-1
Solyc07g062810.2.1	1	5	FM	Can and Nbenth	Prec	Not prec	FALSE	TRUE			Branched-chain amino acid aminotransferase-like (AHRD V1 **** Q5NAM3_ORYSJ); contains Interpro domain(s) IPR001544 Aminotransferase, class IV
Solyc06g065630.2.1	1	5	FM	Can and Nbenth	Prec	Not prec	FALSE	TRUE			Monooxygenase (AHRD V1 **** B5GNT3_STRCL); contains Interpro domain(s) IPR000103 Pyridine nucleotide-disulphide oxidoreductase, class-II
Solyc12g007160.1.1	1	5	FM	Can and Nbenth	Prec	Prec	TRUE	TRUE			Protein ABIL1 (AHRD V1 *--- B6TCZ2_MAIZE)
Solyc00g050430.2.1	1	5	FM	Can and Nbenth	Prec	Prec	TRUE	TRUE	bHLH		BHLH transcription factor (AHRD V1 *-*- A9YWR2_MEDTR); contains Interpro domain(s) IPR011598 Helix-loop-helix DNA-binding
Solyc02g083250.2.1	1	5	FM	Can and Nbenth	Prec	Prec	TRUE	FALSE			Cellular retinaldehyde-binding/triple function C-terminal (AHRD V1 **-- B6SN40_MAIZE); contains Interpro domain(s) IPR001251 Cellular retinaldehyde-binding/triple function, C-terminal
Solyc02g081670.1.1	1	5	FM	Can and Nbenth	Prec	Prec	TRUE	TRUE			Fimbriata (Fragment) (AHRD V1 **-- Q6QVW9_MIMLE); contains Interpro domain(s) IPR001810 Cyclin-like F-box
Solyc03g121060.2.1	1	5	FM	Can and Nbenth	Prec	Prec	TRUE	TRUE		GO:0003700	Auxin response factor 9 (AHRD V1 *-** ARFI_ARATH); contains Interpro domain(s) IPR003311 AUX/IAA protein
Solyc06g073190.2.1	1	5	FM	Can and Nbenth	Prec	Prec	TRUE	TRUE			Fructokinase-like (AHRD V1 **-* Q307Z3_SOLTU); contains Interpro domain(s) IPR002173 Carbohydrate/puine kinase, PfkB, conserved site
Solyc02g090220.2.1	1	5	FM	Can and Nbenth	Prec	Prec	TRUE	FALSE	Dof	GO:0003700	Dof zinc finger protein (AHRD V1 *-*- Q9SXG5_ORYSA); contains Interpro domain(s) IPR003851 Zinc finger, Dof-type
Solyc05g049980.2.1	1	5	FM	Can and Nbenth	Prec	Prec	TRUE	FALSE			Glycoside hydrolase family 28 protein/polygalacturonase family protein (AHRD V1 **-- Q1PF10_ARATH); contains Interpro domain(s) IPR012334 Pectin lyase fold
Solyc12g009300.1.1	1	5	FM	Can and Nbenth	Prec	Prec	TRUE	FALSE			Sucrose synthase (AHRD V1 **** O82693_SOLLC); contains Interpro domain(s) IPR012820 Sucrose synthase, plants and cyanobacteria IPR000368 Sucrose synthase
Solyc09g008830.2.1	1	5	FM	Can and Nbenth	Prec	Prec	TRUE	FALSE			Os01g0318400 protein (Fragment) (AHRD V1 *-*- Q7XXQ7_ORYSJ)
Solyc02g068070.2.1	1	5	FM	Can and Nbenth	Prec	Prec	TRUE	TRUE			Lipase (AHRD V1 **** Q1XBG1_RICCO); contains Interpro domain(s) IPR006693 AB-hydrolase associated lipase region
Solyc03g064030.2.1	1	5	FM	Can and Nbenth	Prec	Prec	TRUE	FALSE			C4orf29 homolog (AHRD V1 **-- B5X1A7_SALSA); contains Interpro domain(s) IPR019149 Protein of unknown function DUF2048
Solyc05g055880.2.1	1	5	FM	Can and Nbenth	Prec	Prec	TRUE	TRUE			Nucleolar protein 5 (AHRD V1 ***- Q6P364_XENTR); contains Interpro domain(s) IPR002687 Pre-mRNA processing ribonucleoprotein, binding region
Solyc09g007260.2.1	1	5	FM	Can and Nbenth	Prec	Prec	TRUE	TRUE	AP2	GO:0003677	AP2-like ethylene-responsive transcription factor At1g79700 (AHRD V1 *--- AP2L3_ARATH); contains Interpro domain(s) IPR001471 Pathogenesis-related transcriptional factor and ERF, DNA-binding
Solyc01g100370.2.1	1	5	FM	Can and Nbenth	Prec	Prec	TRUE	TRUE			Universal stress protein (AHRD V1 ***- B6SNQ1_MAIZE); contains Interpro domain(s) IPR006016 UspA
Solyc09g075210.2.1	1	5	FM	Can and Nbenth	Prec	Prec	TRUE	FALSE			Late embryogenesis abundant protein 5 (AHRD V1 ***- Q1HGG0_9ROSI); contains Interpro domain(s) IPR004926 Late embryogenesis abundant protein 3
Solyc07g053220.1.1	1	5	FM	Can and Nbenth	Prec	Prec	TRUE	FALSE			Receptor-like protein kinase (AHRD V1 ***- Q9LLN5_ORYSA); contains Interpro domain(s) IPR002290 Serine/threonine protein kinase
Solyc07g006380.2.1	1	5	FM	Can and Nbenth	Prec	Prec	TRUE	FALSE			Defensin-like protein (AHRD V1 ***- Q948T3_PYRPY); contains Interpro domain(s) IPR008177 Gamma Purothionin
Solyc10g080880.1.1	1	5	FM	Can and Nbenth	Prec	Prec	TRUE	TRUE			Auxin efflux carrier (AHRD V1 ***- D6RT09_SOLLC); contains Interpro domain(s) IPR014024 Auxin efflux carrier, subgroup
Solyc03g114840.2.1	1	5	FM	Can and Nbenth	Prec	Prec	TRUE	TRUE	MIKC	GO:0003700	MADS box transcription factor 11 (AHRD V1 **** D9IFM5_ONCHC); contains Interpro domain(s) IPR002100 Transcription factor, MADS-box IPR002487 Transcription factor, K-box
Solyc08g081480.2.1	1	5	FM	Can and Nbenth	Prec	Prec	TRUE	TRUE			Polygalacturonase-like protein (AHRD V1 **-- Q84LI7_FRAAN); contains Interpro domain(s) IPR012334 Pectin lyase fold
Solyc02g080230.2.1	1	5	FM	Can and Nbenth	Prec	Prec	TRUE	FALSE			Rop-interactive crib motif-containing protein 1 (AHRD V1 *--- D7LGA6_ARALY); contains Interpro domain(s) IPR000095 PAK-box/P21-Rho-binding
Solyc02g094400.2.1	1	5	FM	Can and Nbenth	Prec	Prec	TRUE	TRUE			Glycerophosphodiester phosphodiesterase gde1 (AHRD V1 ***- B6JW52_SCHJY); contains Interpro domain(s) IPR004129 Glycerophosphoryl diester phosphodiesterase
Solyc01g104950.2.1	1	5	FM	Can and Nbenth	Prec	Prec	TRUE	TRUE			Alpha-L-arabinofuranosidase/beta-D-xylosidase (AHRD V1 **** D9D7L0_MALDO); contains Interpro domain(s) IPR001764 Glycoside hydrolase, family 3, N-terminal
Solyc03g121790.2.1	1	5	FM	Nbenth	Not prec	Not prec	FALSE	TRUE			EPIDERMAL PATTERNING FACTOR-like protein 3 (AHRD V1 ***- EPFL3_ARATH)
Solyc03g095780.1.1	1	5	FM	Nbenth	Not prec	Not prec	FALSE	TRUE			Abscisic acid receptor PYL6 (AHRD V1 **-* PYL6_ARATH); contains Interpro domain(s) IPR019587 Polyketide cyclase/dehydrase
Solyc10g038080.1.1	1	5	FM	Nbenth	Not prec	Not prec	FALSE	TRUE			Shikimate dehydrogenase (AHRD V1 ***- B6TSW1_MAIZE); contains Interpro domain(s) IPR001381 Dehydroquinase class I
Solyc02g038740.2.1	1	5	FM	Nbenth	Not prec	Not prec	FALSE	TRUE			3-hydroxy-3-methylglutaryl coenzyme A reductase (AHRD V1 **** Q9FS01_SOLTU); contains Interpro domain(s) IPR004554 Hydroxymethylglutaryl-CoA reductase, class I, catalytic
Solyc11g073130.1.1	1	5	FM	Nbenth	Not prec	Not prec	FALSE	FALSE			Protein tyrosine phosphatase 1B (AHRD V1 *-*- D9IVF2_STRIE); contains Interpro domain(s) IPR007482 Protein-tyrosine phosphatase-like, PTPLA
Solyc06g075360.2.1	1	5	FM	Nbenth	Not prec	Not prec	FALSE	FALSE			Senescence-associated protein (AHRD V1 ***- B6T9C5_MAIZE); contains Interpro domain(s) IPR000301 Tetraspanin, subgroup
Solyc04g076820.1.1	1	5	FM	Nbenth	Not prec	Not prec	FALSE	FALSE			Octicosapeptide/Phox/Bem1p domain-containing protein (AHRD V1 *--- D7MPG4_ARALY); contains Interpro domain(s) IPR000270 Octicosapeptide/Phox/Bem1p
Solyc02g080510.1.1	1	5	FM	Nbenth	Not prec	Not prec	FALSE	FALSE			Arabidopsis thaliana genomic DNA chromosome 5 P1 clone MOK16 (AHRD V1 *-*- Q9LYW2_ARATH); contains Interpro domain(s) IPR007608 Protein of unknown function DUF584
Solyc09g005110.2.1	1	5	FM	Nbenth	Not prec	Not prec	FALSE	TRUE			Pyruvate decarboxylase 1 (AHRD V1 **** Q84V95_LOTCO); contains Interpro domain(s) IPR012110 Pyruvate decarboxylase/indolepyruvate decarboxylase
Solyc10g052470.1.1	1	5	FM	Nbenth	Not prec	Not prec	FALSE	TRUE	MYB_related	GO:0003700	Myb family transcription factor (Fragment) (AHRD V1 **** D7KSM0_ARALY); contains Interpro domain(s) IPR017884 SANT, eukarya
Solyc03g113060.2.1	1	5	FM	Nbenth	Not prec	Not prec	FALSE	TRUE			ATP-binding cassette transporter (AHRD V1 ***- D8RFW2_SELML); contains Interpro domain(s) IPR003439 ABC transporter-like
Solyc08g036570.1.1	1	5	FM	Nbenth	Not prec	Not prec	FALSE	TRUE			Glutaredoxin (AHRD V1 **** B9GF65_POPTR); contains Interpro domain(s) IPR011905 Glutaredoxin-like, plant II
Solyc10g008400.1.1	1	5	FM	Nbenth	Not prec	Not prec	FALSE	FALSE			RING finger protein 5 (AHRD V1 *--- B6TI40_MAIZE); contains Interpro domain(s) IPR018957 Zinc finger, C3HC4 RING-type
Solyc03g060510.2.1	1	5	FM	Nbenth	Not prec	Not prec	FALSE	FALSE			Membrane protein (AHRD V1 **-- D0BK36_9LACT); contains Interpro domain(s) IPR008537 Protein of unknown function DUF819
Solyc12g094440.1.1	1	5	FM	Nbenth	Not prec	Not prec	FALSE	TRUE			High mobility group family (Fragment) (AHRD V1 **-- B9GFX2_POPTR); contains Interpro domain(s) IPR001606 AT-rich interaction region
Solyc07g032740.2.1	1	5	FM	Nbenth	Not prec	Not prec	FALSE	TRUE			Aspartate aminotransferase (AHRD V1 **** A9PHH1_POPTR); contains Interpro domain(s) IPR000796 Aspartate/other aminotransferase
Solyc02g089290.2.1	1	5	FM	Nbenth	Not prec	Not prec	FALSE	TRUE			ATP binding / kinase/ protein serine / threonine kinase (AHRD V1 **** C5DB47_VITVI); contains Interpro domain(s) IPR002290 Serine/threonine protein kinase
Solyc04g025510.2.1	1	5	FM	Nbenth	Not prec	Not prec	FALSE	FALSE			Os02g0194300 protein (Fragment) (AHRD V1 *-*- Q0E347_ORYSJ); contains Interpro domain(s) IPR014854 Nse4
Solyc08g005560.2.1	1	5	FM	Nbenth	Not prec	Not prec	FALSE	FALSE			Binding protein (AHRD V1 ***- D7MGU4_ARALY)
Solyc04g014260.1.1	1	5	FM	Nbenth	Not prec	Not prec	FALSE	FALSE	ZF-HD	GO:0003700	Zinc finger-homeodomain protein 1 (Fragment) (AHRD V1 **-- B0LK17_YUCFI); contains Interpro domain(s) IPR006456 ZF-HD homeobox protein Cys/His-rich dimerisation region
Solyc07g017610.2.1	1	5	FM	Nbenth	Not prec	Not prec	FALSE	FALSE			Saccharopine dehydrogenase (NAD(+) L-glutamate-forming) (AHRD V1 *-** C7PUW7_CHIPD); contains Interpro domain(s) IPR005097 Saccharopine dehydrogenase
Solyc10g085740.1.1	1	5	FM	Nbenth	Not prec	Not prec	FALSE	FALSE			GDSL esterase/lipase At5g03820 (AHRD V1 ***- GDL73_ARATH); contains Interpro domain(s) IPR001087 Lipase, GDSL
Solyc02g084680.2.1	1	5	FM	Nbenth	Not prec	Not prec	FALSE	TRUE	SRS	GO:0003700	Short internodes 2 (AHRD V1 **-- B9MXK1_POPTR); contains Interpro domain(s) IPR007818 Protein of unknown function DUF702
Solyc01g104880.2.1	1	5	FM	Nbenth	Not prec	Not prec	FALSE	TRUE			Phosphatidylserine decarboxylase proenzyme 2 (AHRD V1 **** D3AWK7_POLPA); contains Interpro domain(s) IPR005221 Phosphatidylserine decarboxylase
Solyc05g007240.1.1	1	5	FM	Nbenth	Not prec	Not prec	FALSE	FALSE			TO109-12 (Fragment) (AHRD V1 *-*- Q3LVG1_TAROF)
Solyc08g081740.2.1	1	5	FM	Nbenth	Not prec	Not prec	FALSE	FALSE			Katanin p60 ATPase-containing subunit (AHRD V1 *--* KTNA1_ARATH); contains Interpro domain(s) IPR003959 ATPase, AAA-type, core
Solyc01g093960.2.1	1	5	FM	Nbenth	Prec	Not prec	FALSE	TRUE	MIKC		MADS box transcription factor (AHRD V1 ***- Q2NNC0_ELAGV); contains Interpro domain(s) IPR002487 Transcription factor, K-box
Solyc02g077880.2.1	1	5	FM	Nbenth	Prec	Not prec	FALSE	FALSE			Auxin-repressed protein (AHRD V1 ***- Q6PXE1_9SOLN); contains Interpro domain(s) IPR008406 Dormancyauxin associated
Solyc04g082410.2.1	1	5	FM	Nbenth	Prec	Not prec	FALSE	TRUE			BTB/POZ domain-containing protein (AHRD V1 **-- D7LC69_ARALY); contains Interpro domain(s) IPR013089 Kelch related
Solyc03g098710.1.1	1	5	FM	Nbenth	Prec	Not prec	FALSE	FALSE			Kunitz-type proteinase inhibitor A4 (Fragment) (AHRD V1 **** C5IWR3_SOLBR); contains Interpro domain(s) IPR011065 Kunitz inhibitor ST1-like
Solyc01g079880.2.1	1	5	FM	Nbenth	Prec	Not prec	FALSE	TRUE			Asparagine synthetase (AHRD V1 *--- Q9ZST6_ARATH)
Solyc10g051390.1.1	1	5	FM	Nbenth	Prec	Not prec	FALSE	FALSE			RNA-binding glycine-rich protein-1b (AHRD V1 **** Q40427_NICSY); contains Interpro domain(s) IPR015465 RNA recognition motif, glycine rich protein
Solyc03g117300.2.1	1	5	FM	Nbenth	Prec	Not prec	FALSE	FALSE			Nodulin-like protein (AHRD V1 ***- Q8H6R3_PONTR); contains Interpro domain(s) IPR010658 Nodulin-like
Solyc02g093910.2.1	1	5	FM	Nbenth	Prec	Not prec	FALSE	TRUE			Kelch repeat-containing protein-like (AHRD V1 ***- Q6ZK44_ORYSJ); contains Interpro domain(s) IPR015915 Kelch-type beta propeller
Solyc04g074770.2.1	1	5	FM	Nbenth	Prec	Not prec	FALSE	FALSE			Unknown Protein (AHRD V1)
Solyc12g038510.1.1	1	5	FM	Nbenth	Prec	Not prec	FALSE	TRUE	MIKC		MADS box transcription factor 11 (AHRD V1 ***- D9IFM5_ONCHC); contains Interpro domain(s) IPR002487 Transcription factor, K-box
Solyc03g098780.1.1	1	5	FM	Nbenth	Prec	Not prec	FALSE	FALSE			Kunitz-type protease inhibitor (AHRD V1 **** Q3S488_SOLTU); contains Interpro domain(s) IPR002160 Proteinase inhibitor I3, Kunitz legume
Solyc01g066720.2.1	1	5	FM	Nbenth	Prec	Not prec	FALSE	TRUE			Hypoxia induced protein conserved region containing protein (AHRD V1 ***- B6UCX6_MAIZE); contains Interpro domain(s) IPR007667 Hypoxia induced protein conserved region
Solyc05g041200.2.1	1	5	FM	Nbenth	Prec	Not prec	FALSE	FALSE			4-hydroxyphenylpyruvate dioxygenase (AHRD V1 **** B7X935_HEVBR); contains Interpro domain(s) IPR005956 4-hydroxyphenylpyruvate dioxygenase
Solyc02g090730.2.1	1	5	FM	Nbenth	Prec	Not prec	FALSE	FALSE			Cell number regulator 1 (AHRD V1 **-- B6TZ45_MAIZE); contains Interpro domain(s) IPR006461 Protein of unknown function Cys-rich
Solyc02g031710.2.1	1	5	FM	Nbenth	Prec	Not prec	FALSE	TRUE			Protein binding protein (AHRD V1 **-- D7L0L7_ARALY); contains Interpro domain(s) IPR001841 Zinc finger, RING-type
Solyc10g047030.1.1	1	5	FM	Nbenth	Prec	Not prec	FALSE	TRUE			Beta-xylosidase 4 (AHRD V1 **** D7MRV5_ARALY); contains Interpro domain(s) IPR001764 Glycoside hydrolase, family 3, N-terminal
Solyc08g078940.1.1	1	5	FM	Nbenth	Prec	Not prec	FALSE	TRUE			Cortical cell-delineating protein (AHRD V1 **-- B6U436_MAIZE); contains Interpro domain(s) IPR013770 Plant lipid transfer protein and hydrophobic protein, helical
Solyc01g006390.2.1	1	5	FM	Nbenth	Prec	Not prec	FALSE	FALSE			Cysteine-rich extensin-like protein-4 (AHRD V1 *-*- Q08197_TOBAC)
Solyc04g077830.2.1	1	5	FM	Nbenth	Prec	Not prec	FALSE	TRUE			Calmodulin-binding protein (AHRD V1 **-* Q7XJB9_ORYSI); contains Interpro domain(s) IPR011990 Tetratricopeptide-like helical
Solyc04g010330.2.1	1	5	TM	Can	Not prec	Not prec	FALSE	TRUE			Auxin-regulated protein (AHRD V1 *-*- Q945F5_SOLLC); contains Interpro domain(s) IPR010369 Protein of unknown function DUF966
Solyc03g097920.1.1	1	5	TM	Can	Not prec	Not prec	FALSE	FALSE			Mitogen-activated protein kinase kinase (AHRD V1 **** D7NPU9_CAPAN); contains Interpro domain(s) IPR002290 Serine/threonine protein kinase
Solyc10g074870.1.1	1	5	TM	Can	Not prec	Not prec	FALSE	TRUE			KH domain containing RNA binding signal transduction associated 1 (AHRD V1 *--- Q29RQ2_BOVIN); contains Interpro domain(s) IPR004087 K Homology
Solyc03g112580.2.1	1	5	TM	Can	Not prec	Not prec	FALSE	TRUE			Receptor like kinase, RLK
Solyc09g097930.2.1	1	5	TM	Can	Not prec	Not prec	FALSE	TRUE			MazG nucleotide pyrophosphohydrolase (AHRD V1 ***- B1J275_PSEPW); contains Interpro domain(s) IPR004518 NTP pyrophosphohydrolase MazG, putative catalytic core
Solyc08g007690.1.1	1	5	TM	Can	Not prec	Not prec	FALSE	FALSE			Subtilisin-like protease (AHRD V1 **-- Q9LWA3_SOLLC); contains Interpro domain(s) IPR015500 Peptidase S8, subtilisin-related
Solyc07g053290.2.1	1	5	TM	Can	Not prec	Not prec	FALSE	TRUE	bHLH	GO:0003700	BHLH transcription factor (AHRD V1 *--* B4FMK3_MAIZE); contains Interpro domain(s) IPR001092 Basic helix-loop-helix dimerisation region bHLH
Solyc01g067540.1.1	1	5	TM	Can	Not prec	Not prec	FALSE	TRUE	ERF	GO:0003677_GO:0006355	Ethylene responsive transcription factor 12 (AHRD V1 *-*- C0J9I3_9ROSA); contains Interpro domain(s) IPR001471 Pathogenesis-related transcriptional factor and ERF, DNA-binding
Solyc04g080820.2.1	1	5	TM	Can	Not prec	Not prec	FALSE	TRUE			Cytokinin oxidase/dehydrogenase (AHRD V1 **** C3VPM7_SOLTU); contains Interpro domain(s) IPR015345 Cytokinin dehydrogenase 1, FAD and cytokinin binding
Solyc07g063820.2.1	1	5	TM	Can	Not prec	Not prec	FALSE	FALSE			Serine/threonine-protein kinase receptor (AHRD V1 **** B6U2B7_MAIZE); contains Interpro domain(s) IPR002290 Serine/threonine protein kinase
Solyc04g076480.2.1	1	5	TM	Can	Not prec	Not prec	FALSE	TRUE			Serine/threonine-protein kinase B-raf (AHRD V1 *-** BRAF_COTJA); contains Interpro domain(s) IPR002290 Serine/threonine protein kinase
Solyc01g006660.1.1	1	5	TM	Can	Not prec	Not prec	FALSE	TRUE			Subtilisin-like serine protease (AHRD V1 **-* Q8LAE1_ARATH); contains Interpro domain(s) IPR015500 Peptidase S8, subtilisin-related
Solyc07g014670.2.1	1	5	TM	Can	Not prec	Not prec	FALSE	FALSE			Cytochrome P450
Solyc09g010230.1.1	1	5	TM	Can	Not prec	Not prec	FALSE	TRUE	B3	GO:0003700	Auxin response factor 24 (AHRD V1 *-** D9HNV1_MAIZE); contains Interpro domain(s) IPR003340 Transcriptional factor B3
Solyc12g005040.1.1	1	5	TM	Can	Not prec	Not prec	FALSE	TRUE			Calcium-dependent protein kinase (AHRD V1 ***- Q9XER6_SOLTU); contains Interpro domain(s) IPR011992 EF-Hand type
Solyc05g006010.2.1	1	5	TM	Can	Not prec	Not prec	FALSE	TRUE			Peptide transporter (AHRD V1 **-* A6YJX4_9MAGN); contains Interpro domain(s) IPR000109 TGF-beta receptor, type I/II extracellular region
Solyc08g080460.1.1	1	5	TM	Can	Not prec	Not prec	FALSE	TRUE			Serine/threonine protein kinase (AHRD V1 *-** C4PKQ3_PRUPE); contains Interpro domain(s) IPR002290 Serine/threonine protein kinase
Solyc10g005060.2.1	1	5	TM	Can	Not prec	Not prec	FALSE	TRUE			O-methyltransferase-like protein (AHRD V1 **** D3JZ18_PRUMU); contains Interpro domain(s) IPR016461 O-methyltransferase, COMT, eukaryota
Solyc04g080970.2.1	1	5	TM	Can	Not prec	Not prec	FALSE	TRUE	SRS		Short internode related sequence 5 (AHRD V1 **-- D2KC76_BRARP); contains Interpro domain(s) IPR007818 Protein of unknown function DUF702
Solyc02g081230.2.1	1	5	TM	Can	Not prec	Not prec	FALSE	TRUE			Unknown Protein (AHRD V1)
Solyc10g079600.1.1	1	5	TM	Can	Not prec	Prec	FALSE	TRUE		GO:0006355	Response regulator 6 (AHRD V1 ***- Q9FRY9_MAIZE); contains Interpro domain(s) IPR001789 Signal transduction response regulator, receiver region
Solyc07g022830.2.1	1	5	TM	Can	Not prec	Prec	FALSE	FALSE			Xenotropic and polytropic retrovirus receptor (AHRD V1 **-- B2GU54_XENTR); contains Interpro domain(s) IPR004342 EXS, C-terminal
Solyc04g080740.1.1	1	5	TM	Can	Not prec	Prec	FALSE	TRUE	bZIP		BZIP transcription factor family protein (AHRD V1 **-- D7KSN7_ARALY); contains Interpro domain(s) IPR011700 Basic leucine zipper
Solyc02g089690.2.1	1	5	TM	Can	Not prec	Prec	FALSE	TRUE			Leaf senescence protein-like (AHRD V1 ***- Q8RV74_ORYSJ); contains Interpro domain(s) IPR004253 Protein of unknown function DUF231, plant
Solyc02g089210.2.1	1	5	TM	Can and Nbenth	Not prec	Not prec	FALSE	TRUE	MIKC		MADS box transcription factor (AHRD V1 ***- Q689E7_GENTR); contains Interpro domain(s) IPR002487 Transcription factor, K-box
Solyc12g049540.1.1	1	5	TM	Can and Nbenth	Not prec	Not prec	FALSE	TRUE			Polyphosphoinositide phosphatase (AHRD V1 ***- C0S4L1_PARBP); contains Interpro domain(s) IPR002013 Synaptojanin, N-terminal
Solyc02g089160.2.1	1	5	TM	Can and Nbenth	Not prec	Not prec	FALSE	TRUE			Cytochrome P450
Solyc10g078370.1.1	1	5	TM	Can and Nbenth	Not prec	Not prec	FALSE	TRUE			Auxin efflux carrier (AHRD V1 ***- D6RT09_SOLLC); contains Interpro domain(s) IPR014024 Auxin efflux carrier, subgroup
Solyc02g089620.2.1	1	5	TM	Can and Nbenth	Not prec	Not prec	FALSE	TRUE			Proline dehydrogenase (AHRD V1 **** A1E289_ACTDE); contains Interpro domain(s) IPR015659 Proline oxidase
Solyc01g010150.2.1	1	5	TM	Can and Nbenth	Not prec	Not prec	FALSE	TRUE			Unknown protein DS12 from 2D-PAGE of leaf, chloroplastic (AHRD V1 *--- UP12_ORYSJ); contains Interpro domain(s) IPR002912 Amino acid-binding ACT
Solyc10g075050.1.1	1	5	TM	Can and Nbenth	Not prec	Not prec	FALSE	TRUE			Non-specific lipid-transfer protein (AHRD V1 ***- A7UGG9_SOLTU); contains Interpro domain(s) IPR013770 Plant lipid transfer protein and hydrophobic protein, helical
Solyc07g007750.2.1	1	5	TM	Can and Nbenth	Not prec	Not prec	FALSE	TRUE			Defensin protein (AHRD V1 ***- B1N678_SOLLC); contains Interpro domain(s) IPR008177 Gamma Purothionin
Solyc02g092490.2.1	1	5	TM	Can and Nbenth	Not prec	Not prec	FALSE	TRUE			Acetyltransferase-like protein (AHRD V1 ***- Q7EYF5_ORYSJ); contains Interpro domain(s) IPR000182 GCN5-related N-acetyltransferase
Solyc01g065540.2.1	1	5	TM	Can and Nbenth	Not prec	Not prec	FALSE	TRUE	ARR-B	GO:0003700	Response regulator 8 (AHRD V1 *-*- Q9AV93_MAIZE); contains Interpro domain(s) IPR017053 Response regulator, plant B-type
Solyc02g088820.2.1	1	5	TM	Can and Nbenth	Not prec	Not prec	FALSE	TRUE			Serine carboxypeptidase K10B2.2 (AHRD V1 **** B6TSK4_MAIZE); contains Interpro domain(s) IPR001563 Peptidase S10, serine carboxypeptidase
Solyc01g096410.2.1	1	5	TM	Can and Nbenth	Not prec	Not prec	FALSE	TRUE			Phosphatidylinositol-4-phosphate 5-kinase family protein (AHRD V1 ***- D7L735_ARALY); contains Interpro domain(s) IPR017163 Phosphatidylinositol-4-phosphate 5-kinase, plant
Solyc02g077780.2.1	1	5	TM	Can and Nbenth	Not prec	Not prec	FALSE	TRUE			Necrotic spotted lesions 1 (Fragment) (AHRD V1 *-*- B6ZA38_HELPE); contains Interpro domain(s) IPR001862 Membrane attack complex component/perforin/complement C9
Solyc04g008450.2.1	1	5	TM	Can and Nbenth	Not prec	Prec	FALSE	FALSE			Potassium transporter 17 (AHRD V1 **** B6T8T1_MAIZE); contains Interpro domain(s) IPR003855 K+ potassium transporter
Solyc02g063430.2.1	1	5	TM	Can and Nbenth	Not prec	Prec	FALSE	FALSE	bHLH	GO:0003700	BHLH transcription factor (AHRD V1 **** A9YWR2_MEDTR); contains Interpro domain(s) IPR011598 Helix-loop-helix DNA-binding
Solyc03g007240.2.1	1	5	TM	Can and Nbenth	Not prec	Prec	FALSE	FALSE			Spermidine synthase 1 (AHRD V1 **** B6TA19_MAIZE); contains Interpro domain(s) IPR001045 Spermine synthase
Solyc06g072430.1.1	1	5	TM	Can and Nbenth	Not prec	Prec	FALSE	TRUE			Bcl-2-associated athanogene-like protein (AHRD V1 *-*- D1MIX4_VITVI); contains Interpro domain(s) IPR003103 Apoptosis regulator Bcl-2 protein, BAG
Solyc09g074970.2.1	1	5	TM	Can and Nbenth	Not prec	Prec	FALSE	TRUE			Thiamin pyrophosphokinase 1 (AHRD V1 **** B6SUI9_MAIZE); contains Interpro domain(s) IPR016966 Thiamin pyrophosphokinase, eukaryotic
Solyc03g019950.2.1	1	5	TM	Can and Nbenth	Prec	Not prec	FALSE	TRUE			Genomic DNA chromosome 5 P1 clone MAC12 (AHRD V1 **-- Q9FFX3_ARATH); contains Interpro domain(s) IPR004328 BRO1
Solyc02g072310.2.1	1	5	TM	Can and Nbenth	Prec	Not prec	FALSE	TRUE			Receptor like kinase, RLK
Solyc01g098240.1.1	1	5	TM	Can and Nbenth	Prec	Not prec	FALSE	FALSE			RNA polymerase Rpb1 C-terminal repeat domain-containing protein (AHRD V1 *--- C5GU31_AJEDR); contains Interpro domain(s) IPR012474 Frigida-like
Solyc04g080580.2.1	1	5	TM	Can and Nbenth	Prec	Not prec	FALSE	TRUE			Kinase PfkB family (AHRD V1 **** D4WID3_BACOV); contains Interpro domain(s) IPR011611 Carbohydrate/purine kinase
Solyc10g076790.1.1	1	5	TM	Can and Nbenth	Prec	Not prec	FALSE	TRUE			Auxin transporter-like protein 1 (AHRD V1 **** B6U1Y3_MAIZE); contains Interpro domain(s) IPR013057 Amino acid transporter, transmembrane
Solyc03g026040.2.1	1	5	TM	Can and Nbenth	Prec	Not prec	FALSE	TRUE			Receptor like kinase, RLK
Solyc04g078460.2.1	1	5	TM	Can and Nbenth	Prec	Not prec	FALSE	TRUE			N(4)-(Beta-N-acetylglucosaminyl)-L-asparaginase (AHRD V1 **** ASPG_ELIMR); contains Interpro domain(s) IPR000246 Peptidase T2, asparaginase 2
Solyc05g006550.2.1	1	5	TM	Can and Nbenth	Prec	Not prec	FALSE	TRUE			Microtubule-associated protein TORTIFOLIA1 (AHRD V1 *--- B6SS76_MAIZE); contains Interpro domain(s) IPR011989 Armadillo-like helical
Solyc01g010130.2.1	1	5	TM	Can and Nbenth	Prec	Not prec	FALSE	TRUE	bHLH	GO:0003700	Transcription factor (AHRD V1 *-** D6MKM4_9ASPA); contains Interpro domain(s) IPR011598 Helix-loop-helix DNA-binding
Solyc01g098500.2.1	1	5	TM	Can and Nbenth	Prec	Not prec	FALSE	FALSE			Glucose transporter 8 (AHRD V1 ***- Q2KKJ3_SOLIN); contains Interpro domain(s) IPR003663 Sugar/inositol transporter
Solyc09g025280.1.1	1	5	TM	Can and Nbenth	Prec	Not prec	FALSE	FALSE			Light-dependent short hypocotyls 1 (AHRD V1 ***- D7M6V0_ARALY); contains Interpro domain(s) IPR006936 Protein of unknown function DUF640
Solyc06g062790.2.1	1	5	TM	Can and Nbenth	Prec	Not prec	FALSE	TRUE			Casein kinase I-like (AHRD V1 ***- Q8LR51_ORYSJ); contains Interpro domain(s) IPR002290 Serine/threonine protein kinase
Solyc09g005690.2.1	1	5	TM	Can and Nbenth	Prec	Not prec	FALSE	TRUE			Inositol-1 4 5-trisphosphate 5-Phosphatase-like protein (AHRD V1 ***- Q9M1W5_ARATH); contains Interpro domain(s) IPR000300 Inositol polyphosphate related phosphatase
Solyc06g066340.2.1	1	5	TM	Can and Nbenth	Prec	Not prec	FALSE	TRUE	G2-like		Myb family transcription factor-like protein (AHRD V1 *--- Q84UP8_ORYSJ); contains Interpro domain(s) IPR006447 Myb-like DNA-binding region, SHAQKYF class
Solyc04g015970.2.1	1	5	TM	Can and Nbenth	Prec	Not prec	FALSE	TRUE			ATP-binding cassette 1 (AHRD V1 *-*- Q80ZB2_RAT); contains Interpro domain(s) IPR003439 ABC transporter-like
Solyc04g078110.1.1	1	5	TM	Can and Nbenth	Prec	Not prec	FALSE	TRUE			Subtilisin-like protease (AHRD V1 **-- A9XG40_TOBAC); contains Interpro domain(s) IPR015500 Peptidase S8, subtilisin-related
Solyc08g077010.1.1	1	5	TM	Can and Nbenth	Prec	Not prec	FALSE	TRUE			AT-hook DNA-binding protein (Fragment) (AHRD V1 *--* A1DR79_CATRO); contains Interpro domain(s) IPR014476 Predicted AT-hook DNA-binding
Solyc06g065100.2.1	1	5	TM	Can and Nbenth	Prec	Not prec	FALSE	TRUE	MYB	GO:0003700	Myb-like transcription factor 1 (AHRD V1 **** Q8H271_GOSHI); contains Interpro domain(s) IPR015495 Myb transcription factor
Solyc12g008640.1.1	1	5	TM	Can and Nbenth	Prec	Not prec	FALSE	TRUE			Gamma-glutamyltransferase-like protein (AHRD V1 ***- Q9M0G0_ARATH); contains Interpro domain(s) IPR000101 Gamma-glutamyltranspeptidase
Solyc11g064800.1.1	1	5	TM	Can and Nbenth	Prec	Not prec	FALSE	TRUE	SRS		Stylish (AHRD V1 *--- D2KC71_BRARP); contains Interpro domain(s) IPR007818 Protein of unknown function DUF702
Solyc08g079030.2.1	1	5	TM	Can and Nbenth	Prec	Not prec	FALSE	TRUE			Unknown Protein (AHRD V1); contains Interpro domain(s) IPR008581 Protein of unknown function DUF863, plant
Solyc03g006240.2.1	1	5	TM	Can and Nbenth	Prec	Not prec	FALSE	FALSE			GDSL esterase/lipase At5g45910 (AHRD V1 ***- GDL83_ARATH); contains Interpro domain(s) IPR001087 Lipase, GDSL
Solyc04g077480.2.1	1	5	TM	Can and Nbenth	Prec	Not prec	FALSE	TRUE	bHLH	GO:0003700	Transcription factor (AHRD V1 *-** D6MKM4_9ASPA); contains Interpro domain(s) IPR011598 Helix-loop-helix DNA-binding
Solyc01g009860.2.1	1	5	TM	Can and Nbenth	Prec	Not prec	FALSE	FALSE	NAC	GO:0003700	NAC domain transcription factor (AHRD V1 **** Q5DM36_WHEAT); contains Interpro domain(s) IPR003441 No apical meristem (NAM) protein
Solyc02g084960.1.1	1	5	TM	Can and Nbenth	Prec	Not prec	FALSE	TRUE			Genomic DNA chromosome 5 TAC clone K1F13 (AHRD V1 ***- Q9FJZ5_ARATH)
Solyc03g115770.2.1	1	5	TM	Can and Nbenth	Prec	Not prec	FALSE	TRUE			Timing of CAB expression-like
Solyc09g098420.1.1	1	5	TM	Can and Nbenth	Prec	Not prec	FALSE	TRUE			Receptor like kinase, RLK
Solyc03g121270.2.1	1	5	TM	Can and Nbenth	Prec	Not prec	FALSE	FALSE			IAA-amino acid hydrolase (AHRD V1 **** D5FTH2_POPTO); contains Interpro domain(s) IPR017439 Peptidase M20D, mername-AA028/carboxypeptidase Ss1
Solyc08g079650.2.1	1	5	TM	Can and Nbenth	Prec	Not prec	FALSE	TRUE			ACT domain containing protein expressed (AHRD V1 **-- Q10P43_ORYSJ); contains Interpro domain(s) IPR002912 Amino acid-binding ACT
Solyc06g083370.2.1	1	5	TM	Can and Nbenth	Prec	Not prec	FALSE	FALSE			Os01g0917200 protein (Fragment) (AHRD V1 ***- Q0JGL5_ORYSJ); contains Interpro domain(s) IPR009003 Peptidase, trypsin-like serine and cysteine
Solyc06g054250.2.1	1	5	TM	Can and Nbenth	Prec	Prec	TRUE	TRUE			5&apos-nucleotidase surE (AHRD V1 ***- D6YVT2_WADCW); contains Interpro domain(s) IPR002828 Survival protein SurE-like phosphatase/nucleotidase
Solyc12g005030.1.1	1	5	TM	Can and Nbenth	Prec	Prec	TRUE	FALSE			Calcium-dependent protein kinase (AHRD V1 ***- Q9XER6_SOLTU); contains Interpro domain(s) IPR002290 Serine/threonine protein kinase
Solyc03g117100.2.1	1	5	TM	Can and Nbenth	Prec	Prec	TRUE	TRUE			PPPDE peptidase domain-containing protein 1 (AHRD V1 *--- PPDE1_DANRE); contains Interpro domain(s) IPR008580 Protein of unknown function DUF862, eukaryotic
Solyc09g075350.2.1	1	5	TM	Can and Nbenth	Prec	Prec	TRUE	FALSE			Pectinesterase (AHRD V1 ***- B9SAU4_RICCO); contains Interpro domain(s) IPR000070 Pectinesterase, catalytic
Solyc01g109880.2.1	1	5	TM	Can and Nbenth	Prec	Prec	TRUE	TRUE	bZIP	GO:0003677	BZIP transcription factor (AHRD V1 ***- C0KYN1_SOLLC); contains Interpro domain(s) IPR011700 Basic leucine zipper
Solyc11g071470.1.1	1	5	TM	Can and Nbenth	Prec	Prec	TRUE	TRUE			Hydroxycinnamoyl CoA shikimate/quinate hydroxycinnamoyltransferase-like protein (Fragment) (AHRD V1 **-- B9GF60_POPTR); contains Interpro domain(s) IPR003480 Transferase
Solyc01g005560.2.1	1	5	TM	Can and Nbenth	Prec	Prec	TRUE	TRUE			Isocitrate dehydrogenase (AHRD V1 ***- D2D324_GOSHI); contains Interpro domain(s) IPR004790 Isocitrate dehydrogenase NADP-dependent, eukaryotic
Solyc01g099290.2.1	1	5	TM	Can and Nbenth	Prec	Prec	TRUE	FALSE			Cullin-like protein1 (AHRD V1 ***- Q8LP18_PEA); contains Interpro domain(s) IPR016159 Cullin repeat-like
Solyc04g076790.2.1	1	5	TM	Can and Nbenth	Prec	Prec	TRUE	TRUE			Serine hydroxymethyltransferase (AHRD V1 **** B9SMX7_RICCO); contains Interpro domain(s) IPR001085 Serine hydroxymethyltransferase
Solyc11g069030.1.1	1	5	TM	Can and Nbenth	Prec	Prec	TRUE	TRUE	MYB	GO:0003677	MYB transcription factor (AHRD V1 *--- Q9T066_ARATH); contains Interpro domain(s) IPR017930 Myb-type HTH DNA-binding domain
Solyc06g071180.2.1	1	5	TM	Can and Nbenth	Prec	Prec	TRUE	FALSE			Dynein light chain 1 cytoplasmic (AHRD V1 *-*- Q7RN10_PLAYO); contains Interpro domain(s) IPR001372 Dynein light chain, type 1 and 2
Solyc08g005240.1.1	1	5	TM	Can and Nbenth	Prec	Prec	TRUE	TRUE			Lysine-specific demethylase 5B (AHRD V1 *--* KDM5B_HUMAN); contains Interpro domain(s) IPR013129 Transcription factor jumonji
Solyc12g010180.1.1	1	5	TM	Can and Nbenth	Prec	Prec	TRUE	TRUE			Anthranilate synthase (AHRD V1 ***- A1KAT4_AZOSB); contains Interpro domain(s) IPR000991 Glutamine amidotransferase class-I, C-terminal
Solyc08g079020.2.1	1	5	TM	Can and Nbenth	Prec	Prec	TRUE	TRUE			Adenine phosphoribosyltransferase-like protein (AHRD V1 **** Q8LG17_ARATH); contains Interpro domain(s) IPR005764 Adenine phosphoribosyl transferase
Solyc12g094520.1.1	1	5	TM	Nbenth	Not prec	Not prec	FALSE	TRUE			4-coumarate-coa ligase (AHRD V1 ***- B9MY03_POPTR); contains Interpro domain(s) IPR000873 AMP-dependent synthetase and ligase
Solyc09g090760.2.1	1	5	TM	Nbenth	Not prec	Not prec	FALSE	TRUE			Folate/biopterin transporter family protein (AHRD V1 *-*- B6TYM7_MAIZE); contains Interpro domain(s) IPR004324 Biopterin transport-related protein BT1
Solyc10g082020.1.1	1	5	TM	Nbenth	Not prec	Not prec	FALSE	TRUE			Cytokinin riboside 5&apos;-monophosphate phosphoribohydrolase LOG (AHRD V1 **-- LOG_ORYSJ); contains Interpro domain(s) IPR005269 Conserved hypothetical protein CHP00730
Solyc06g053830.2.1	1	5	TM	Nbenth	Not prec	Not prec	FALSE	TRUE		GO:0003700	Auxin responsive protein (AHRD V1 ***- D9IQE6_CATRO); contains Interpro domain(s) IPR003311 AUX/IAA protein
Solyc08g008360.2.1	1	5	TM	Nbenth	Not prec	Not prec	FALSE	TRUE			Unknown Protein (AHRD V1)
Solyc03g122190.2.1	1	5	TM	Nbenth	Prec	Not prec	FALSE	TRUE			Jasmonate ZIM domain 2 (AHRD V1 **-- C7SCY2_CATRO); contains Interpro domain(s) IPR010399 Tify
Solyc08g080210.2.1	1	5	TM	Nbenth	Prec	Not prec	FALSE	FALSE			DNA-directed RNA polymerase (AHRD V1 ***- B9GKP9_POPTR); contains Interpro domain(s) IPR000722 RNA polymerase, alpha subunit
Solyc08g080520.2.1	1	5	TM	Nbenth	Prec	Not prec	FALSE	TRUE			AT5g06970/MOJ9_14 (AHRD V1 **-- Q8RX56_ARATH); contains Interpro domain(s) IPR008528 Protein of unknown function DUF810
Solyc11g032130.1.1	1	5	TM	Nbenth	Prec	Not prec	FALSE	FALSE			NADPH dehydrogenase 3 (AHRD V1 **-* OYE3_YEAST); contains Interpro domain(s) IPR001155 NADH:flavin oxidoreductase/NADH oxidase, N-terminal
Solyc01g088660.2.1	1	5	TM	Nbenth	Prec	Not prec	FALSE	TRUE			Os04g0585900 protein (Fragment) (AHRD V1 *-*- Q0JAP2_ORYSJ); contains Interpro domain(s) IPR007650 Protein of unknown function DUF581
Solyc04g071990.2.1	1	5	TM	Nbenth	Prec	Not prec	FALSE	TRUE			Tomato GIGANTEA 1
Solyc07g042270.2.1	1	5	TM	Nbenth	Prec	Not prec	FALSE	FALSE			ATP-dependent RNA helicase (AHRD V1 **** C6LZE8_GIALA); contains Interpro domain(s) IPR011545 DNA/RNA helicase, DEAD/DEAH box type, N-terminal
Solyc07g043310.2.1	1	5	TM	Nbenth	Prec	Not prec	FALSE	FALSE			Aminotransferase (AHRD V1 ***- D2KZ08_WHEAT); contains Interpro domain(s) IPR005814 Aminotransferase class-III
Solyc07g042550.2.1	1	5	TM	Nbenth	Prec	Not prec	FALSE	TRUE			Sucrose synthase (AHRD V1 **** O82691_SOLLC); contains Interpro domain(s) IPR012820 Sucrose synthase, plants and cyanobacteria IPR000368 Sucrose synthase
Solyc01g080960.2.1	1	5	TM	Nbenth	Prec	Not prec	FALSE	TRUE			AT-hook DNA-binding protein (Fragment) (AHRD V1 *--* A1DR79_CATRO); contains Interpro domain(s) IPR014476 Predicted AT-hook DNA-binding
Solyc03g006590.2.1	1	5	TM	Nbenth	Prec	Not prec	FALSE	TRUE			Unknown Protein (AHRD V1)
Solyc09g042660.2.1	1	5	TM	Nbenth	Prec	Not prec	FALSE	TRUE			CBL-interacting protein kinase 22 (AHRD V1 **** A0MNK8_POPTR); contains Interpro domain(s) IPR002290 Serine/threonine protein kinase
Solyc04g014360.2.1	1	5	TM	Nbenth	Prec	Not prec	FALSE	TRUE	bHLH	GO:0003700	Transcription factor SPATULA (AHRD V1 *-** SPT_ARATH); contains Interpro domain(s) IPR001092 Basic helix-loop-helix dimerisation region bHLH
Solyc08g008310.2.1	1	5	TM	Nbenth	Prec	Not prec	FALSE	TRUE			Long-chain-fatty-acid-CoA ligase (AHRD V1 **** B2WS80_ARAHA); contains Interpro domain(s) IPR000873 AMP-dependent synthetase and ligase
Solyc12g008530.1.1	1	5	TM	Nbenth	Prec	Not prec	FALSE	TRUE			Pectinesterase (AHRD V1 ***- B9RKG6_RICCO); contains Interpro domain(s) IPR000070 Pectinesterase, catalytic
Solyc09g014530.2.1	1.5	1	FM	Can	Not prec	Not prec	FALSE	TRUE			Major latex-like protein (AHRD V1 **-- B5THI3_PANGI); contains Interpro domain(s) IPR000916 Bet v I allergen
Solyc02g081830.2.1	1.5	1	FM	Can	Not prec	Not prec	FALSE	TRUE			HAD-superfamily hydrolase (AHRD V1 ***- D5A3P4_SPIPL); contains Interpro domain(s) IPR011949 HAD-superfamily hydrolase, subfamily IA, REG-2-like
Solyc07g055210.2.1	1.5	1	FM	Can	Not prec	Not prec	FALSE	TRUE			Aspartate aminotransferase (AHRD V1 ***- B9SW33_RICCO); contains Interpro domain(s) IPR000796 Aspartate/other aminotransferase
Solyc04g072760.2.1	1.5	1	FM	Can	Not prec	Not prec	FALSE	TRUE			High affinity sulfate transporter 2 (AHRD V1 **** SUT2_STYHA); contains Interpro domain(s) IPR001902 Sulphate anion transporter
Solyc06g074030.1.1	1.5	1	FM	Can	Not prec	Not prec	FALSE	TRUE			CCR4-NOT transcription complex subunit 7 (AHRD V1 ***- B4FG48_MAIZE); contains Interpro domain(s) IPR006941 Ribonuclease CAF1
Solyc03g120870.2.1	1.5	1	FM	Can	Not prec	Not prec	FALSE	TRUE			UPF0497 membrane protein 14 (AHRD V1 ***- U497E_VITVI); contains Interpro domain(s) IPR006459 Uncharacterised protein family UPF0497, trans-membrane plant subgroup
Solyc12g008650.1.1	1.5	1	FM	Can	Not prec	Not prec	FALSE	TRUE			Inositol oxygenase (AHRD V1 ***- A5FF81_FLAJ1); contains Interpro domain(s) IPR007828 Protein of unknown function DUF706
Solyc07g054780.1.1	1.5	1	FM	Can	Not prec	Not prec	FALSE	TRUE			Wound induced protein (AHRD V1 ***- B6T0U0_MAIZE)
Solyc02g080220.2.1	1.5	1	FM	Can	Not prec	Not prec	FALSE	TRUE			Pectinesterase (AHRD V1 ***- B9RXQ4_RICCO); contains Interpro domain(s) IPR000070 Pectinesterase, catalytic
Solyc07g052100.2.1	1.5	1	FM	Can	Not prec	Not prec	FALSE	TRUE			Chromodomain-helicase-DNA-binding protein 1-like (AHRD V1 *--* CHD1L_DANRE); contains Interpro domain(s) IPR014001 DEAD-like helicase, N-terminal
Solyc03g117300.2.1	1.5	1	FM	Can	Not prec	Not prec	FALSE	FALSE			Nodulin-like protein (AHRD V1 ***- Q8H6R3_PONTR); contains Interpro domain(s) IPR010658 Nodulin-like
Solyc01g090460.2.1	1.5	1	FM	Can	Not prec	Not prec	FALSE	FALSE	HD-ZIP		Homeobox-leucine zipper protein (AHRD V1 *-*- Q39862_SOYBN); contains Interpro domain(s) IPR001356 Homeobox IPR017970 Homeobox, conserved site
Solyc08g080570.2.1	1.5	1	FM	Can	Not prec	Not prec	FALSE	FALSE			UDP-glucose 4-epimerase (AHRD V1 **** B0M3E8_PEA); contains Interpro domain(s) IPR005886 UDP-glucose 4-epimerase
Solyc01g094870.1.1	1.5	1	FM	Can	Not prec	Not prec	FALSE	FALSE			MRNA clone RAFL21-92-I07 (AHRD V1 *--- Q681W9_ARATH); contains Interpro domain(s) IPR006461 Protein of unknown function Cys-rich
Solyc04g082870.1.1	1.5	1	FM	Can	Not prec	Not prec	FALSE	FALSE			Pentatricopeptide repeat-containing protein (AHRD V1 ***- D7KAJ5_ARALY); contains Interpro domain(s) IPR002885 Pentatricopeptide repeat
Solyc01g099910.2.1	1.5	1	FM	Can	Not prec	Not prec	FALSE	TRUE			Epoxide hydrolase (AHRD V1 ***- B3VMR4_NICBE); contains Interpro domain(s) IPR000639 Epoxide hydrolase-like
Solyc09g075420.2.1	1.5	1	FM	Can	Not prec	Not prec	FALSE	TRUE	ERF	GO:0003677	Ethylene responsive transcription factor 2b (AHRD V1 *-*- C0J9I6_9ROSA); contains Interpro domain(s) IPR001471 Pathogenesis-related transcriptional factor and ERF, DNA-binding IPR001711 Phospholipase C, phosphatidylinositol-specific, Y domain
Solyc06g084140.2.1	1.5	1	FM	Can	Not prec	Not prec	FALSE	TRUE			High affinity sulfate transporter 1 (AHRD V1 **** SUT1_STYHA); contains Interpro domain(s) IPR001902 Sulphate anion transporter
Solyc02g087620.2.1	1.5	1	FM	Can	Not prec	Not prec	FALSE	TRUE			Inositol hexakisphosphate and diphosphoinositol-pentakisphosphate kinase 2 (AHRD V1 **-* VIP2_MOUSE); contains Interpro domain(s) IPR000560 Histidine acid phosphatase
Solyc02g022850.1.1	1.5	1	FM	Can	Not prec	Not prec	FALSE	FALSE			FAD-binding domain-containing protein (AHRD V1 **-- D7MFH8_ARALY); contains Interpro domain(s) IPR006094 FAD linked oxidase, N-terminal
Solyc01g109610.2.1	1.5	1	FM	Can	Not prec	Not prec	FALSE	TRUE			2-hydroxyacid dehydrongenase (Fragment) (AHRD V1 *-*- C6F725_PSEMZ)
Solyc01g080900.2.1	1.5	1	FM	Can	Not prec	Not prec	FALSE	TRUE			Cytochrome P450
Solyc07g053120.2.1	1.5	1	FM	Can	Not prec	Not prec	FALSE	FALSE			Serine/threonine-protein kinase receptor (AHRD V1 *-** B6U2B7_MAIZE); contains Interpro domain(s) IPR002290 Serine/threonine protein kinase
Solyc02g090410.2.1	1.5	1	FM	Can	Not prec	Not prec	FALSE	TRUE	LBD		LOB domain family protein (AHRD V1 ***- D7LG10_ARALY); contains Interpro domain(s) IPR004883 Lateral organ boundaries, LOB
Solyc10g076510.1.1	1.5	1	FM	Can	Not prec	Not prec	FALSE	TRUE			Pyruvate decarboxylase (AHRD V1 **** B0ZS79_PRUAR); contains Interpro domain(s) IPR012110 Pyruvate decarboxylase/indolepyruvate decarboxylase
Solyc01g110570.2.1	1.5	1	FM	Can	Not prec	Not prec	FALSE	TRUE			Auxin-induced SAUR-like protein (AHRD V1 **-- Q8S349_CAPAN); contains Interpro domain(s) IPR003676 Auxin responsive SAUR protein
Solyc01g097540.2.1	1.5	1	FM	Can	Not prec	Not prec	FALSE	FALSE			Annexin 3 (AHRD V1 ***- A9X4R3_BRAJU); contains Interpro domain(s) IPR015472 Annexin like protein IPR001464 Annexin
Solyc06g066770.1.1	1.5	1	FM	Can	Not prec	Not prec	FALSE	TRUE			Kelch repeat-containing F-box family protein (AHRD V1 ***- D7KDI0_ARALY); contains Interpro domain(s) IPR015915 Kelch-type beta propeller
Solyc06g048410.2.1	1.5	1	FM	Can	Not prec	Not prec	FALSE	TRUE			Superoxide dismutase (AHRD V1 **** Q7YK44_SOLLC); contains Interpro domain(s) IPR019833 Manganese/iron superoxide dismutase, binding site IPR001189 Manganese/iron superoxide dismutase
Solyc02g067440.2.1	1.5	1	FM	Can	Not prec	Not prec	FALSE	TRUE			Cupin RmlC-type (AHRD V1 **-- B4F886_MAIZE); contains Interpro domain(s) IPR012864 Protein of unknown function DUF1637
Solyc02g079510.2.1	1.5	1	FM	Can	Not prec	Not prec	FALSE	TRUE			Peroxidase (AHRD V1 **** Q50LG4_TOBAC); contains Interpro domain(s) IPR019793 Peroxidases heam-ligand binding site IPR019794 Peroxidase, active site IPR002016 Haem peroxidase, plant/fungal/bacterial
Solyc06g065630.2.1	1.5	1	FM	Can	Not prec	Not prec	FALSE	TRUE			Monooxygenase (AHRD V1 **** B5GNT3_STRCL); contains Interpro domain(s) IPR000103 Pyridine nucleotide-disulphide oxidoreductase, class-II
Solyc03g113710.2.1	1.5	1	FM	Can	Not prec	Not prec	FALSE	TRUE			Formin 3 (AHRD V1 *-*- D0QAN4_ARATH); contains Interpro domain(s) IPR015425 Actin-binding FH2
Solyc07g054760.1.1	1.5	1	FM	Can	Not prec	Not prec	FALSE	FALSE			Wound induced protein (AHRD V1 ***- B6T0U0_MAIZE)
Solyc10g005000.2.1	1.5	1	FM	Can	Not prec	Not prec	FALSE	TRUE			Os03g0648300 protein (Fragment) (AHRD V1 *--- Q0DPZ6_ORYSJ); contains Interpro domain(s) IPR000048 IQ calmodulin-binding region
Solyc04g078540.2.1	1.5	1	FM	Can	Not prec	Prec	FALSE	FALSE			Cathepsin B-like cysteine proteinase (AHRD V1 **-* CYSP_SCHMA); contains Interpro domain(s) IPR013128 Peptidase C1A, papain
Solyc02g090400.2.1	1.5	1	FM	Can	Not prec	Prec	FALSE	TRUE	G2-like	GO:0003700	Myb family transcription factor (AHRD V1 **-* D7LQI3_ARALY); contains Interpro domain(s) IPR006447 Myb-like DNA-binding region, SHAQKYF class
Solyc03g121090.2.1	1.5	1	FM	Can	Not prec	Prec	FALSE	FALSE			Cold induced protein-like (AHRD V1 **-- Q94JH8_ORYSJ)
Solyc08g074480.1.1	1.5	1	FM	Can	Not prec	Prec	FALSE	TRUE			Cortical cell-delineating protein (AHRD V1 **-- B6UGA2_MAIZE); contains Interpro domain(s) IPR013770 Plant lipid transfer protein and hydrophobic protein, helical
Solyc03g043700.2.1	1.5	1	FM	Can	Not prec	Prec	FALSE	TRUE			Armadillo/beta-catenin repeat family protein (AHRD V1 **-- D7L0H5_ARALY); contains Interpro domain(s) IPR011989 Armadillo-like helical
Solyc02g081120.2.1	1.5	1	FM	Can	Not prec	Prec	FALSE	TRUE	TALE		Knotted-1-like homeobox protein H1 (AHRD V1 ***- Q8GUS6_TOBAC); contains Interpro domain(s) IPR005541 KNOX2
Solyc12g013700.1.1	1.5	1	FM	Can	Not prec	Prec	FALSE	FALSE			Aluminum-induced protein-like protein (AHRD V1 ***- Q8S2R9_THEHA)
Solyc06g075360.2.1	1.5	1	FM	Can	Not prec	Prec	FALSE	FALSE			Senescence-associated protein (AHRD V1 ***- B6T9C5_MAIZE); contains Interpro domain(s) IPR000301 Tetraspanin, subgroup
Solyc07g061730.2.1	1.5	1	FM	Can	Not prec	Prec	FALSE	FALSE			Gibberellin 2-oxidase (AHRD V1 **** A4GVL9_SOLLC); contains Interpro domain(s) IPR005123 Oxoglutarate and iron-dependent oxygenase
Solyc10g081320.1.1	1.5	1	FM	Can	Not prec	Prec	FALSE	TRUE	MYB	GO:0003700	MYB transcription factor (AHRD V1 *--* Q9C5P9_ARATH); contains Interpro domain(s) IPR015495 Myb transcription factor
Solyc02g070890.2.1	1.5	1	FM	Can	Not prec	Prec	FALSE	TRUE			Receptor like kinase, RLK
Solyc09g011060.2.1	1.5	1	FM	Can	Not prec	Prec	FALSE	FALSE			Receptor like protein kinase (AHRD V1 **** Q39139_ARATH); contains Interpro domain(s) IPR001220 Legume lectin, beta chain
[truncated: 2,391 more rows]
