# Supplementary material for: The evolution of inflorescence diversity in the nightshades and heterochrony during meristem maturation
Source: HighWire-hosted journal article supplement (doi:10.1101/gr.207837.116), 2016-11-07
Supplement: Supplemental_Table_S12.xlsx [file Supplemental_Table_S12.xlsx]

## Sheet: Sheet1
Supplemental Table S12. Primer sequences used in this study.
Oligo Name	Sequence 5' to 3' (include modification codes if applicable)	Purpose
Univ AN probe F	ATGGAAGCTTTTCATCATSCCCCTATTAG	in situ RNA hybridization
Univ AN probe R	TCAGTTGAAWGACTGAAAGGGCAATGTCA	in situ RNA hybridization
NbAN probe F	ATGGAAGCTTTTCATGCACCTATTAGC	in situ RNA hybridization
NbAN probe R	TCAGTTGAAAGACTGAAAGGGCAATGTC	in situ RNA hybridization
Univ S probe F	ATGGCTTCATCAAATAGACACTGGCCTAG	in situ RNA hybridization
Univ S probe R	GGTGGTTGWACMGTGAAAAAGAAAGGCT	in situ RNA hybridization
NbS probe R	GGAATGCAAAACCCTTGTGTGATAGCATCA	in situ RNA hybridization
pNbAN-B1	GGGGACAAGTTTGTACAAAAAAGCAGGCTATTCATGTCCAAACACAACTC	5' tobacco AN cloning
pNbAN-B4	GGGGACAACTTTGTATAGAAAAGTTGGGTGTAAGGAAAAAAGTAAACTAT	5' tobacco AN cloning
NbAN-B4r	GGGGACAACTTTTCTATACAAAGTTGAAAAAATGGAAGCTTTTCATGCAC	AN CDS tobacco cloning
NbAN-B3r	GGGGACAACTTTATTATACAAAGTTGTACTAATACTGCTACTCCACTTG	AN CDS tobacco cloning
NbAN3'-B3	GGGGACAACTTTGTATAATAAAGTTGTACTATGAATAGTAGTAAGTTGTT	3' tobacco AN cloning
NbAN3'-B2	GGGGACCACTTTGTACAAGAAAGCTGGGTAGCCTCTATTTCCAACGTAGA	3' tobacco AN cloning
SlAN-B4r	GGGGACAACTTTTCTATACAAAGTTGAAATCCCTTTTAGTATTATCTCCA	AN CDS tomato cloning
SlAN-B3r	GGGGACAACTTTATTATACAAAGTTGTACTAGTACTACTGATACCCCAC	AN CDS tomato cloning
qRT-CaSP-F	TTGGGAAGAGAAGTGGTTGG	semi-quantitative RT-PCR
qRT-CaSP-R	CGTCTTCTGGTAGCGGTTTC	semi-quantitative RT-PCR
qRT-CaAN-F	TGGATTCCTCCATGTCCATT	semi-quantitative RT-PCR
qRT-CaAN-R	CTGATACCCCACTTGAAAACAG	semi-quantitative RT-PCR
qRT-CaS-F	TTGCCCTGAGTGAATTGATG	semi-quantitative RT-PCR
qRT-CaS-R	TGAACACTGTCGATCTCGTG	semi-quantitative RT-PCR
qRT-CaAP1-F	GAGCGAAACAACTTAATTTCC	semi-quantitative RT-PCR
qRT-CaAP1-R	AGGTATTAGAACCATGACGA	semi-quantitative RT-PCR
qRT-CaUEP-F	CCGACTACAACATCCAGAAG	semi-quantitative RT-PCR
qRT-CaUEP-R	CACACTCAGCATTAGGACAC	semi-quantitative RT-PCR
qRT-NbS-F	TCCAGAGTGCTAACAATGAGT	semi-quantitative RT-PCR
qRT-NbS-R	CCGAACCCAACCTCAAAAGC	semi-quantitative RT-PCR
qRT-NtCET2,4-F	CCAGGCACTACAGATTGCTCGT	semi-quantitative RT-PCR
qRT-NtCET2,4-R	CTGCAACAGGAGACCCAAGCTC	semi-quantitative RT-PCR
qRT-NbSFT-F	TCGACAATTGGGTCGACAG	semi-quantitative RT-PCR
qRT-NbSFT-R	ATAAAGTATCAATAAAGCATGTC	semi-quantitative RT-PCR
qRT-NtSEP2- F	CAGCGATATCAAAGACACCT	semi-quantitative RT-PCR
qRT-NtSEP2- R	CTCCTTAGTTTGAAGATCAG	semi-quantitative RT-PCR
qRT-NbACT F	TGGTGGCTCTACCATGTTCC	semi-quantitative RT-PCR
qRT-NbACT R	GCAACTGCATTTCTGATCCA	semi-quantitative RT-PCR
qRT-AN-F	GAGCCTTGTTGAAGGGAATG	semi-quantitative RT-PCR of Tomato and wild species AN
qRT-AN-R	AAGGTCCAAATGAAACACTATTCA	semi-quantitative RT-PCR of Tomato and wild species AN
qRT-S-3prime-F	TTCAACTGTTTCTCCTCTTGCT	semi-quantitative RT-PCR of Tomato and wild species S
qRT-S-3prime-R	CCTATCCCAACCTCAAAAGC	semi-quantitative RT-PCR of Tomato and wild species S
qRT-Sl-AP1-U322898-F	TTCGATCGAGAAAGAACCAA	semi-quantitative RT-PCR of Tomato and wild species AP1
qRT-Sl-AP1-U322898-R	TTAGTTTGCTGGTGCCATTC	semi-quantitative RT-PCR of Tomato and wild species AP1
qRT-SFT-3prime-F	GACAATTAGGTCGGCAAACA	semi-quantitative RT-PCR of Tomato and wild species SFT
qRT-SFT-3prime-R	AGCAGCAACAGGTAAACCAA	semi-quantitative RT-PCR of Tomato and wild species SFT
qRT-SP-3prime-F	GTGCACCAGTGTCCAGAGAT	semi-quantitative RT-PCR of Tomato and wild species SP
qRT-SP-3prime-R	TGGTGAGCCAAGTTCATTTT	semi-quantitative RT-PCR of Tomato and wild species SP
qRT-UBI-middle-F	CGTGGTGGTGCTAAGAAGAG	semi-quantitative RT-PCR of Tomato and wild species Ubi
qRT-UBI-middle-R	ACGAAGCCTCTGAACCTTTC	semi-quantitative RT-PCR of Tomato and wild species Ubi
