# Supplementary figures and images for: The evolution of inflorescence diversity in the nightshades and heterochrony during meristem maturation
Source: PubMed Central journal article supplement — Genome Res. 2016 Dec;26(12):1676–86. doi: 10.1101/gr.207837.116 (PMC5131819; doi:10.1101/gr.207837.116), 2016-12

# Supplemental Figure S10

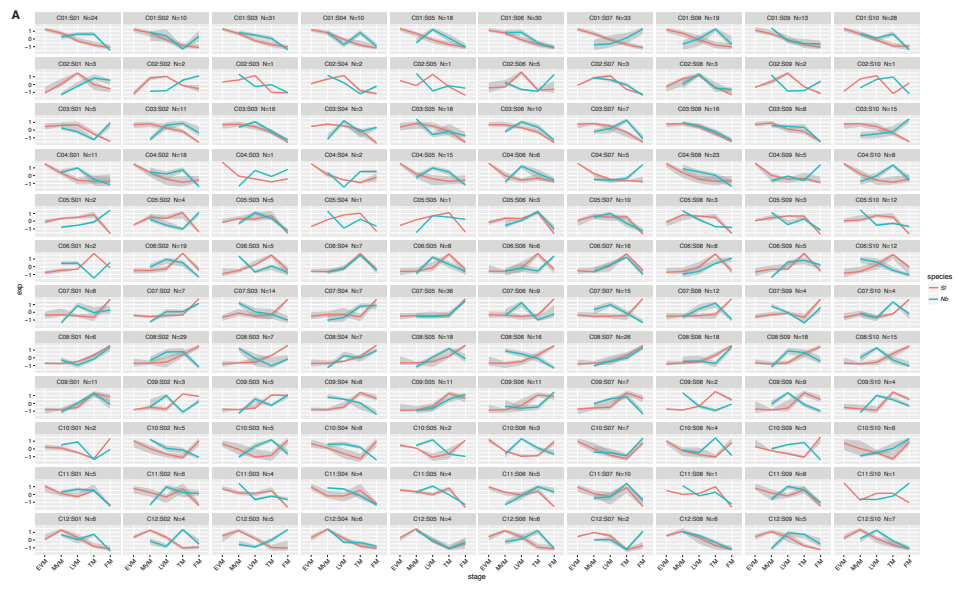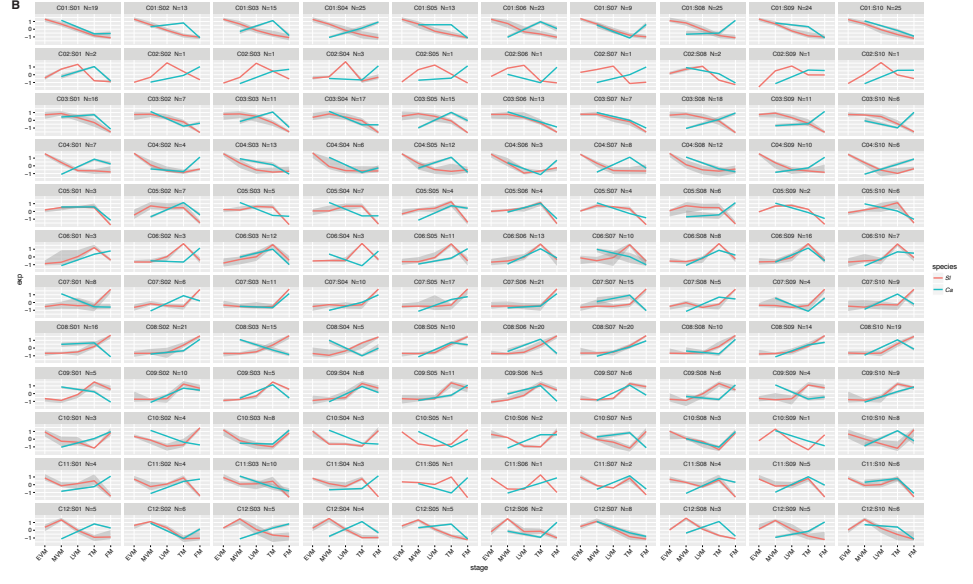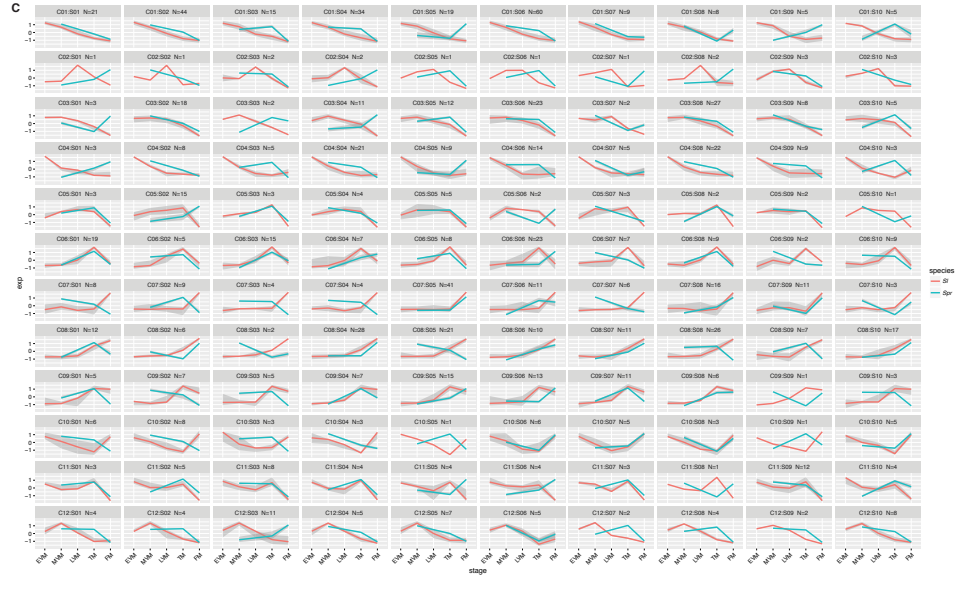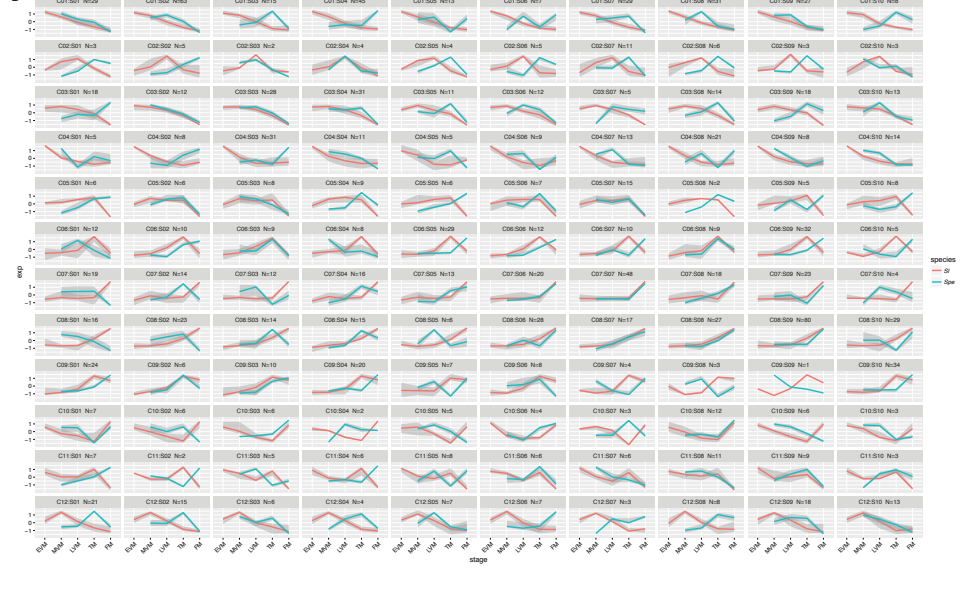

Supplement: supp_gr.207837.116_Supplemental_Fig_S10.pdf [file supp_gr.207837.116_Supplemental_Fig_S10.pdf]

# Supplemental Figure S12

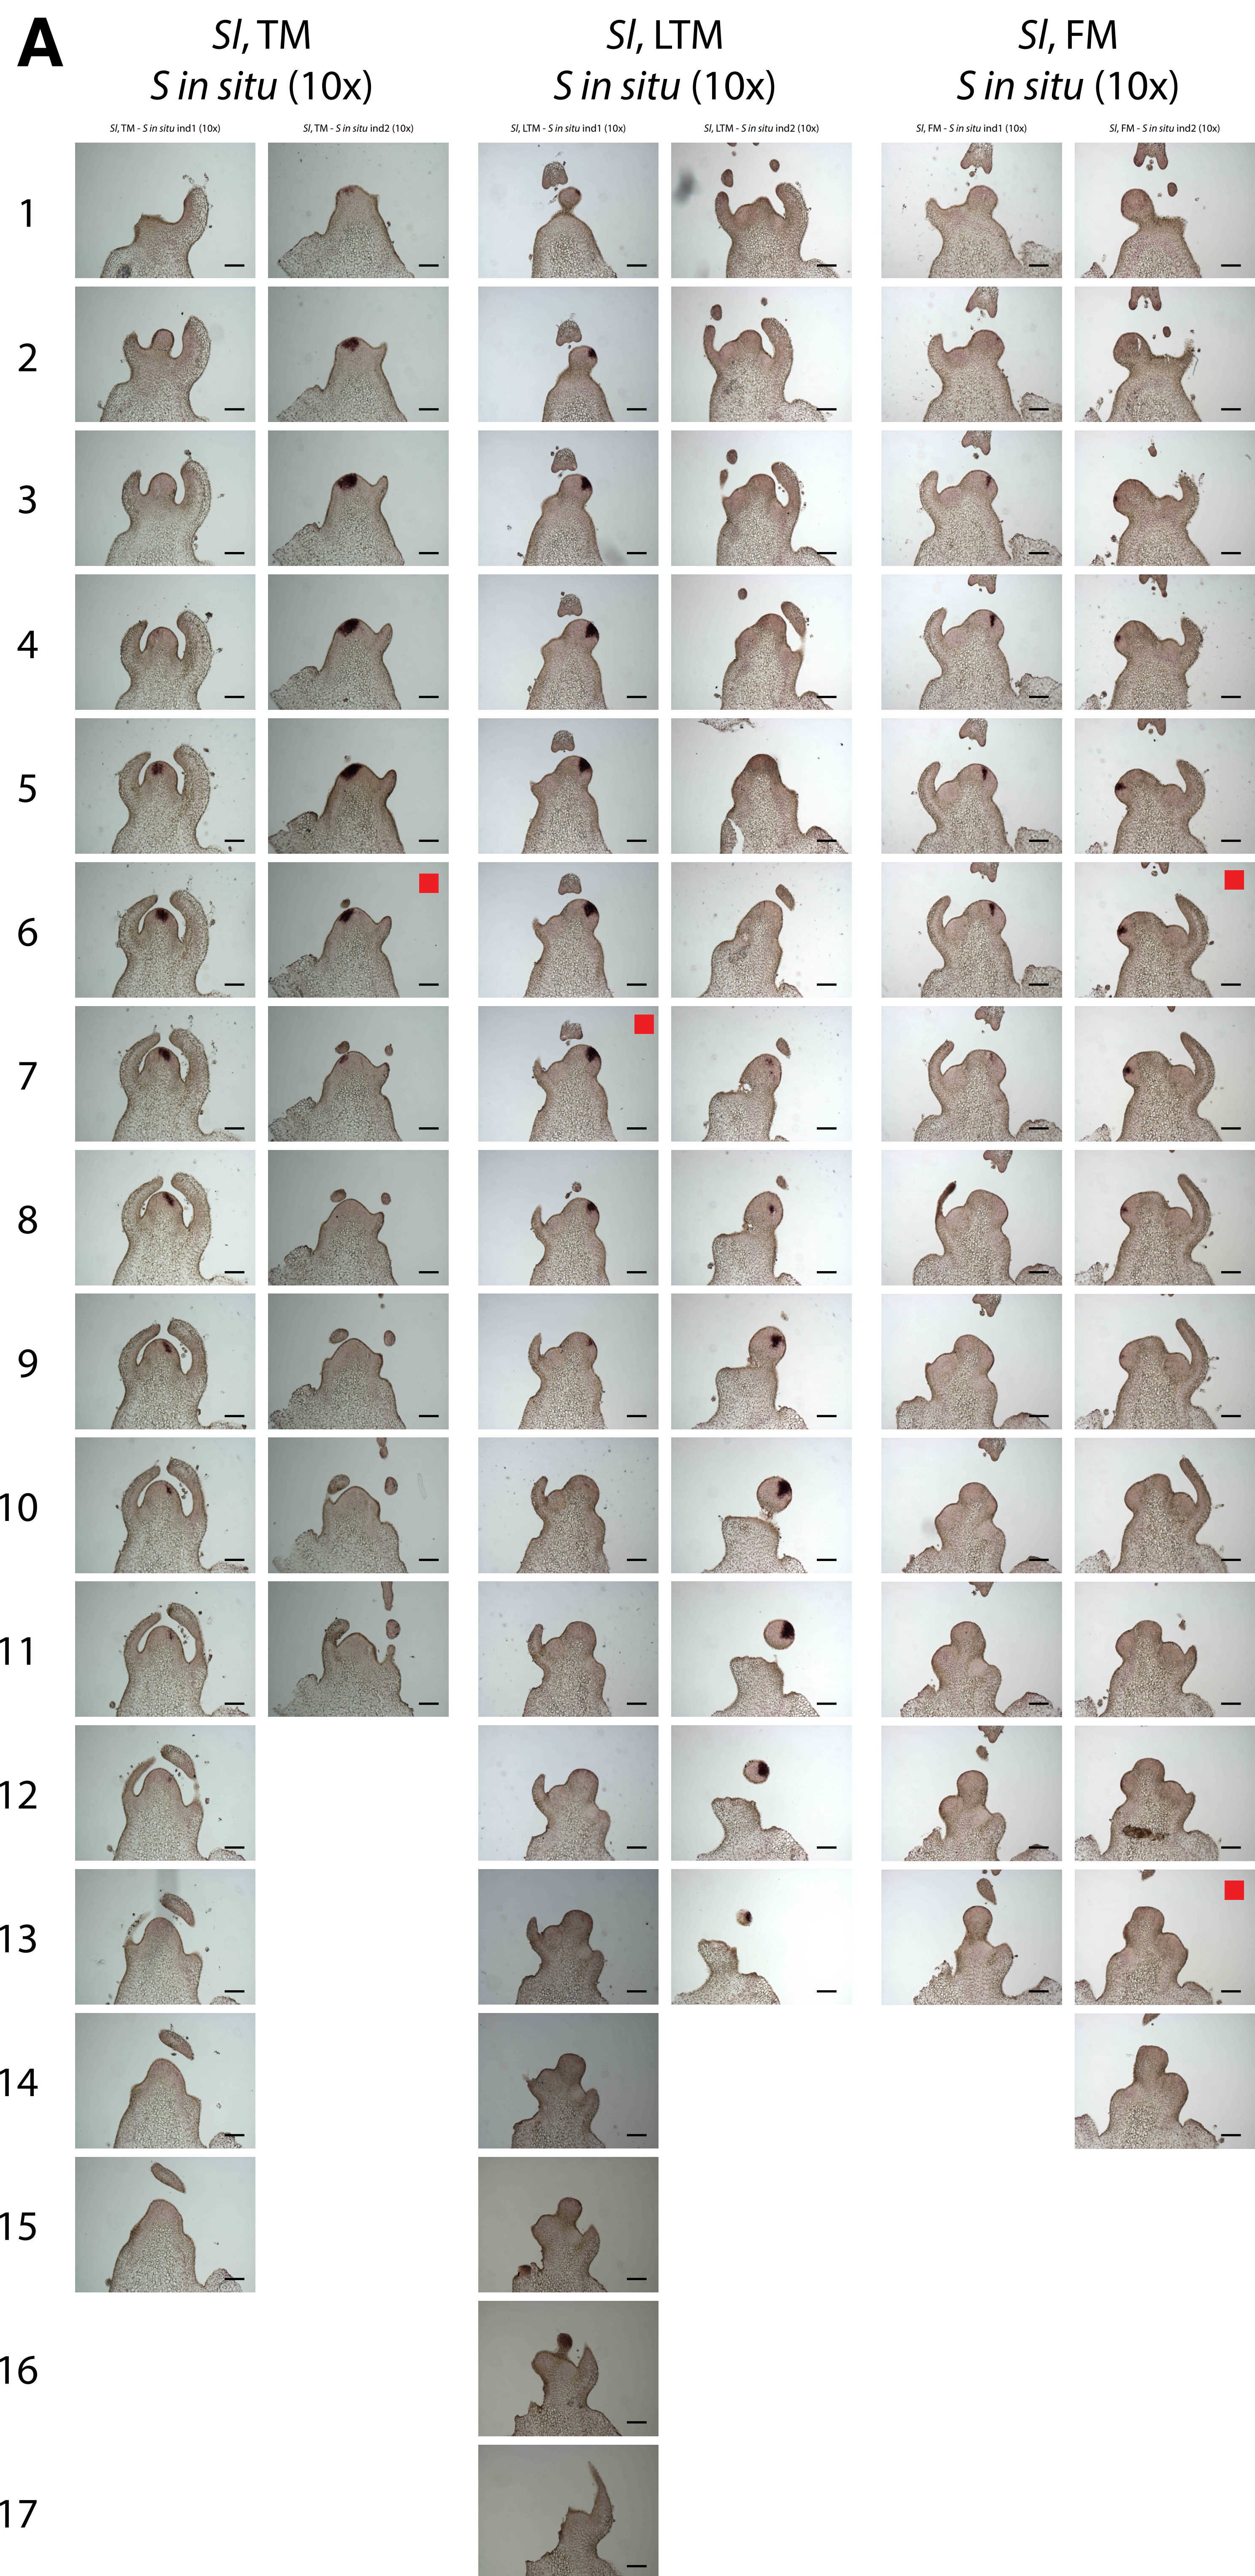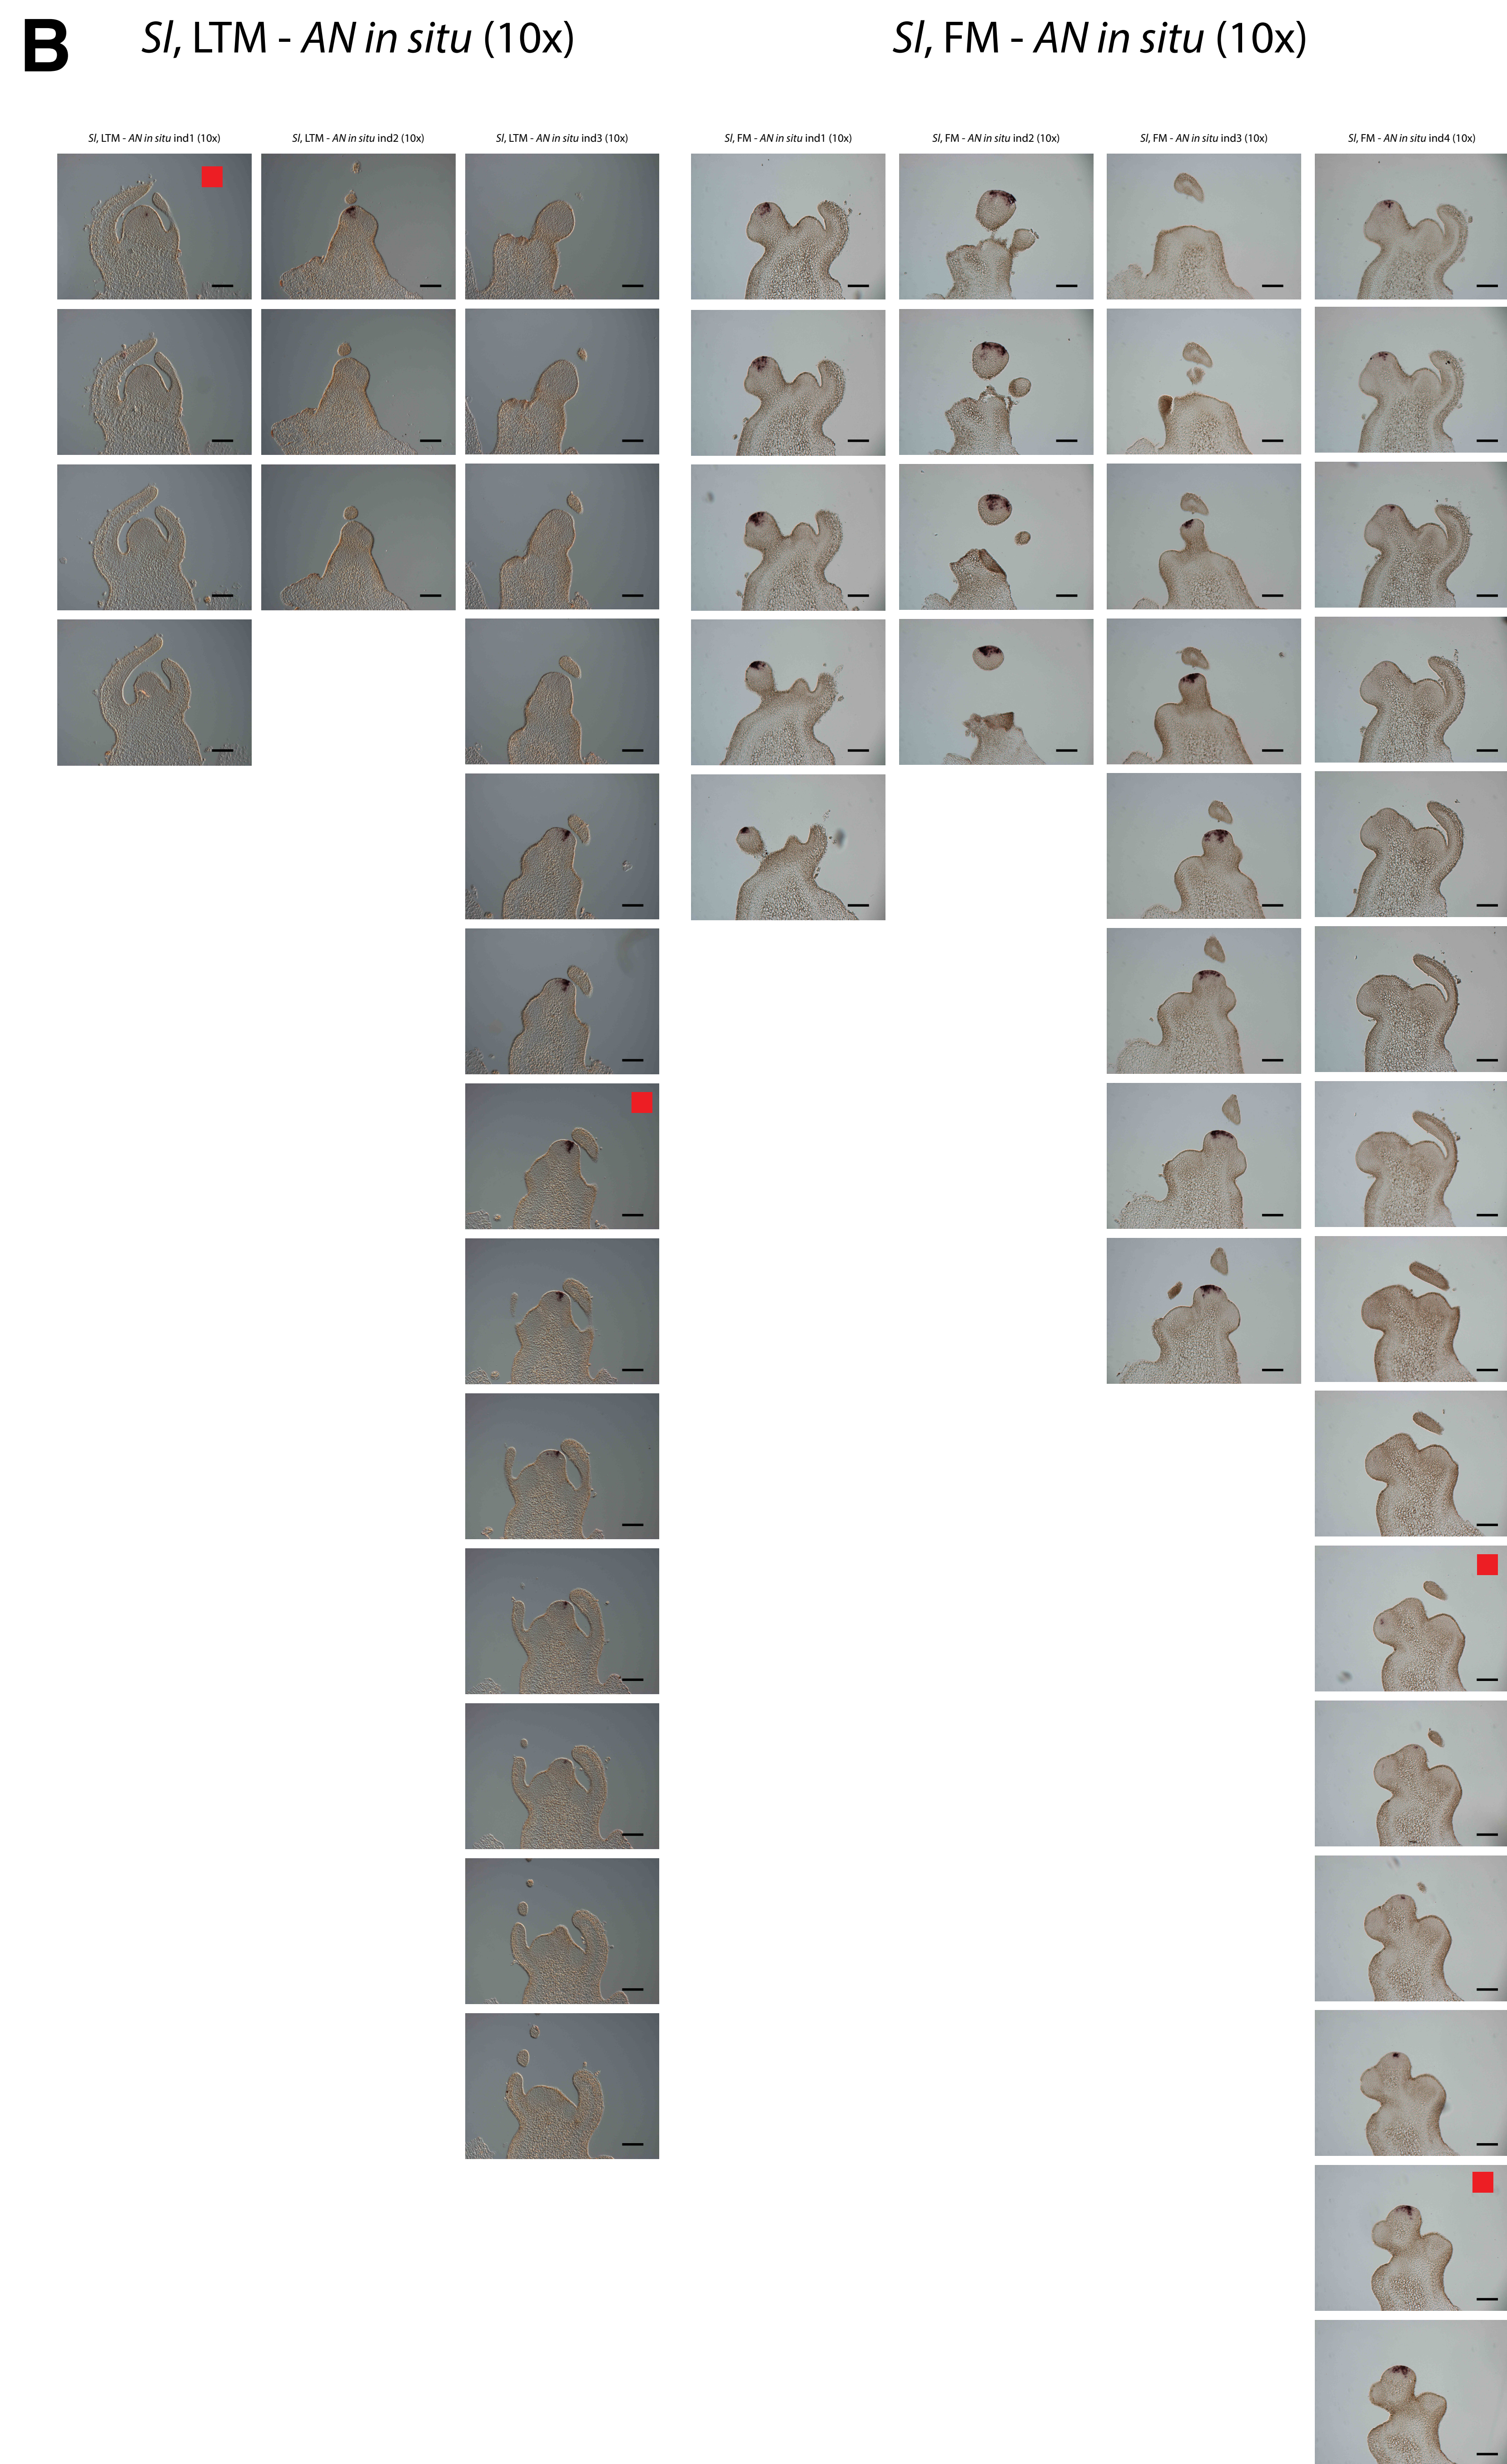

Supplement: supp_gr.207837.116_Supplemental_Fig_S12.pdf [file supp_gr.207837.116_Supplemental_Fig_S12.pdf]

# Supplemental Figure S13

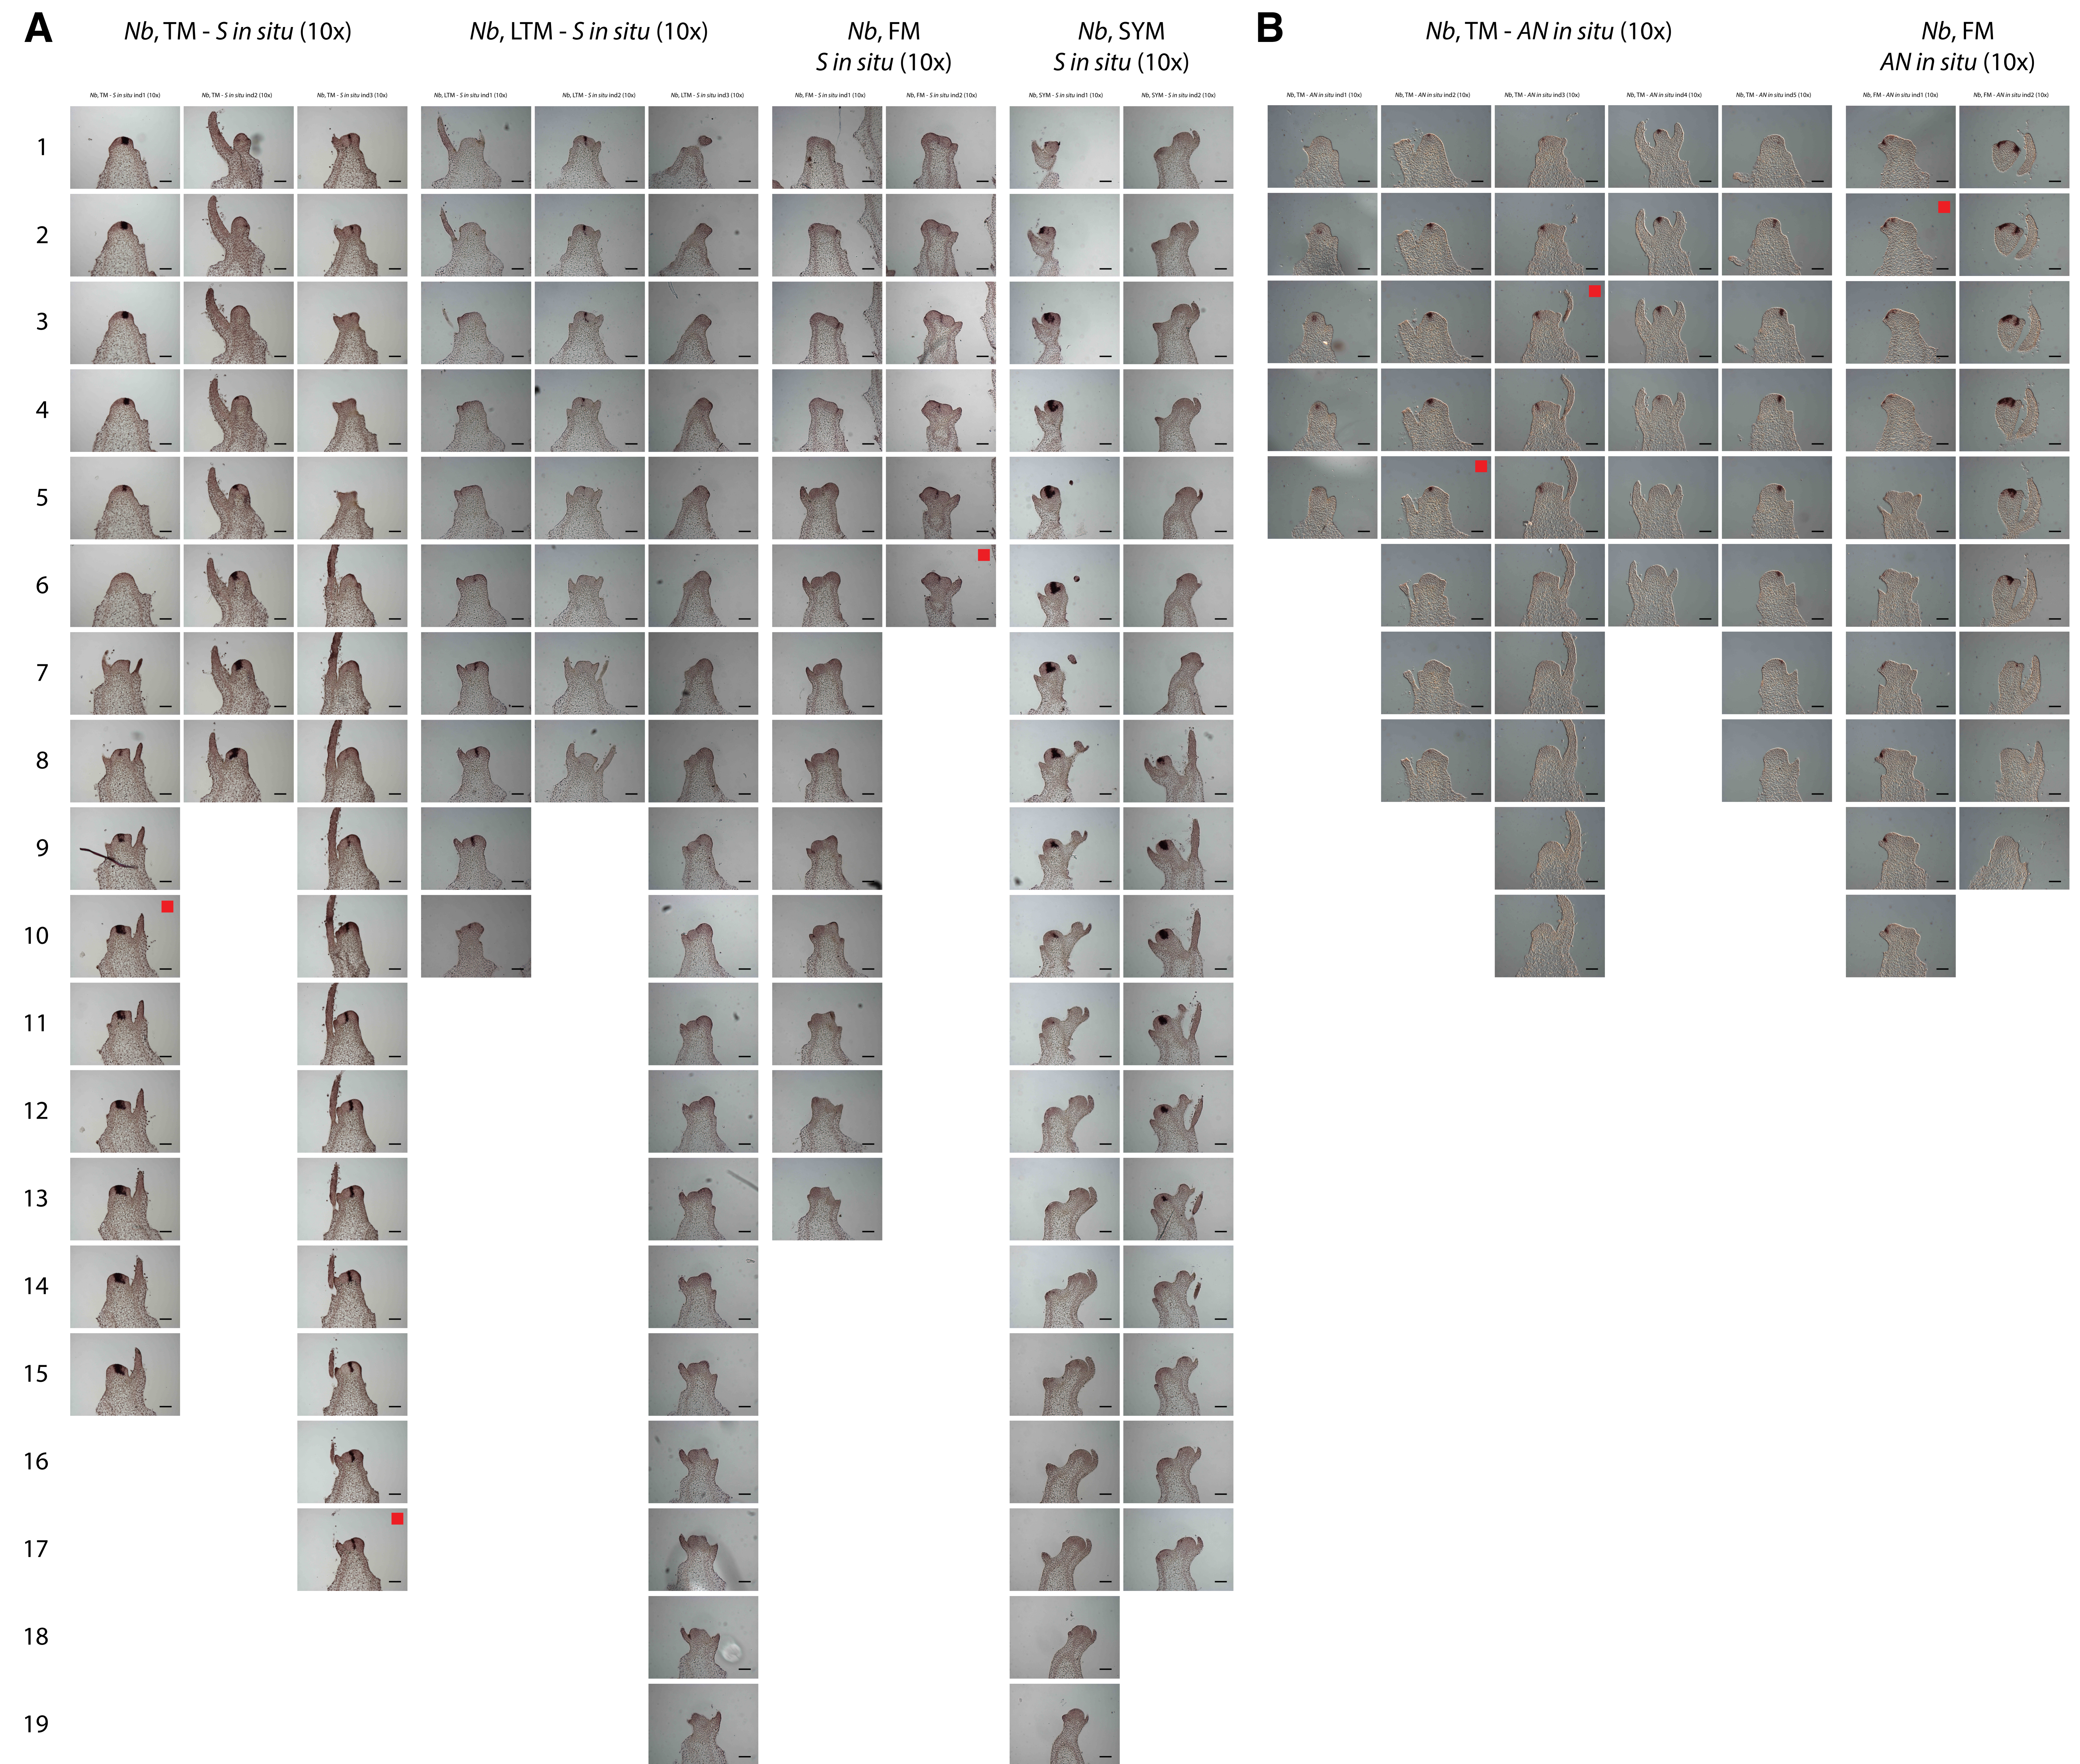

Supplement: supp_gr.207837.116_Supplemental_Fig_S13.pdf [file supp_gr.207837.116_Supplemental_Fig_S13.pdf]

# Supplemental Figure S15

**A**

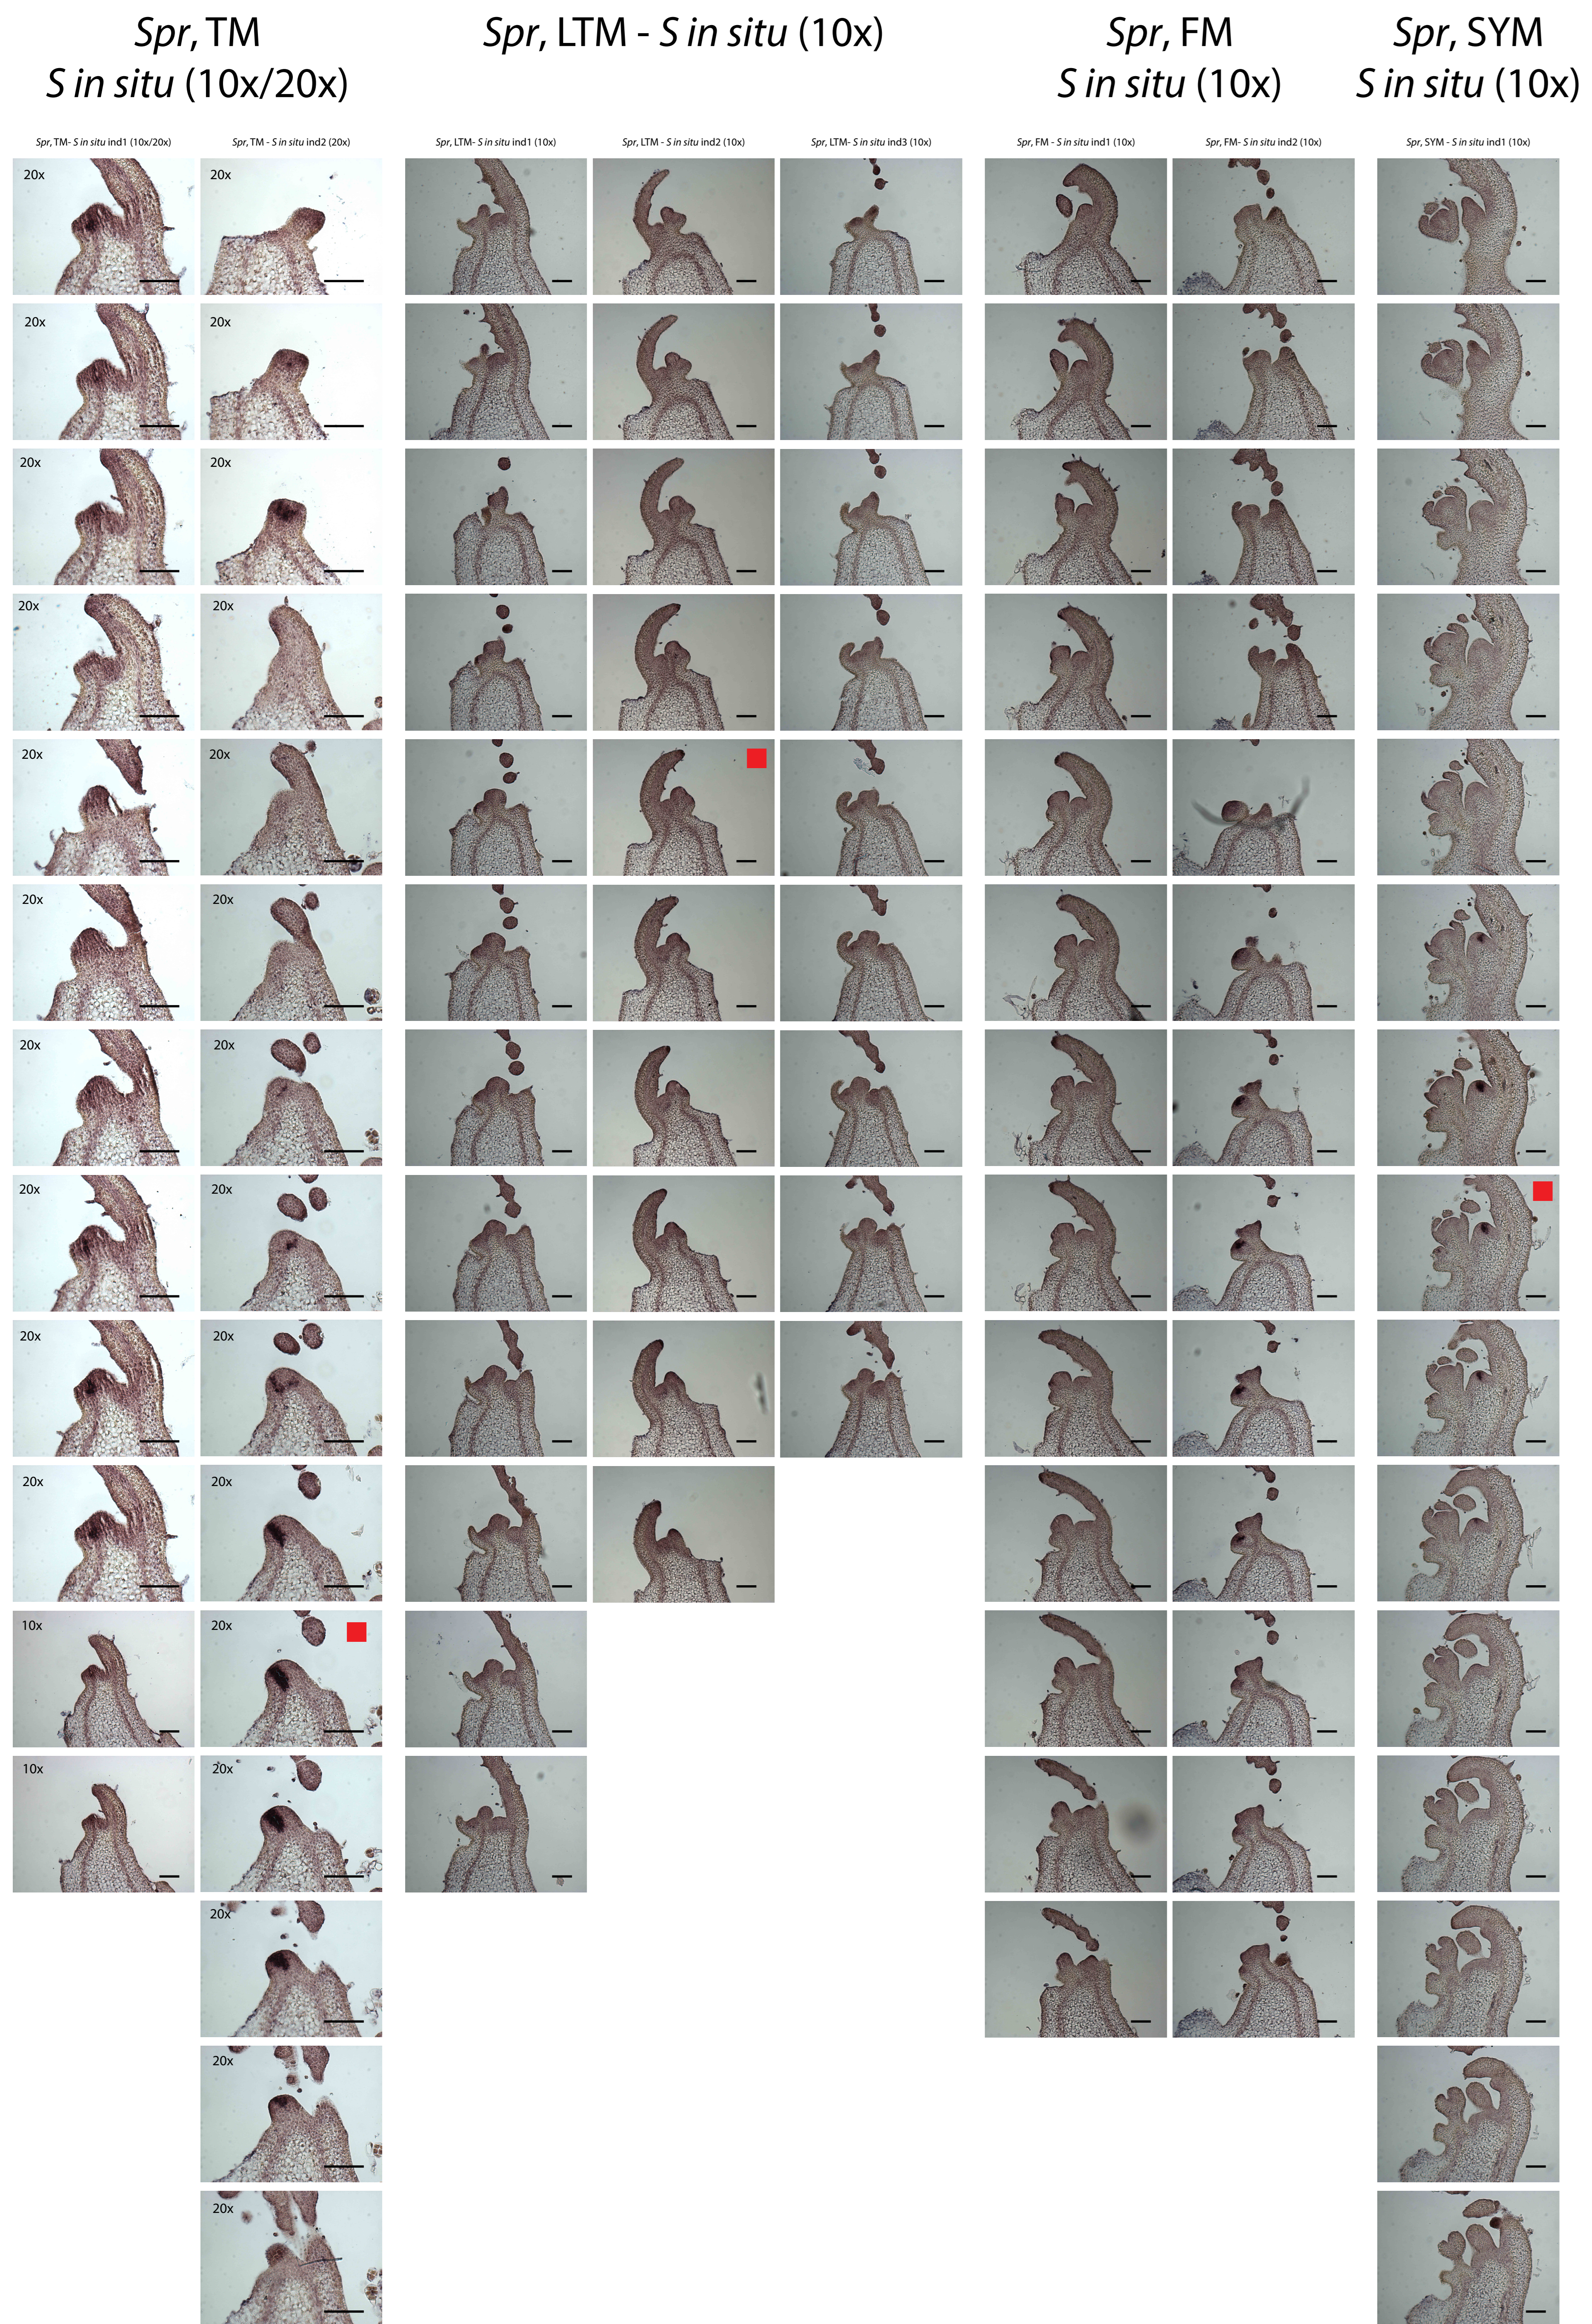

**B**

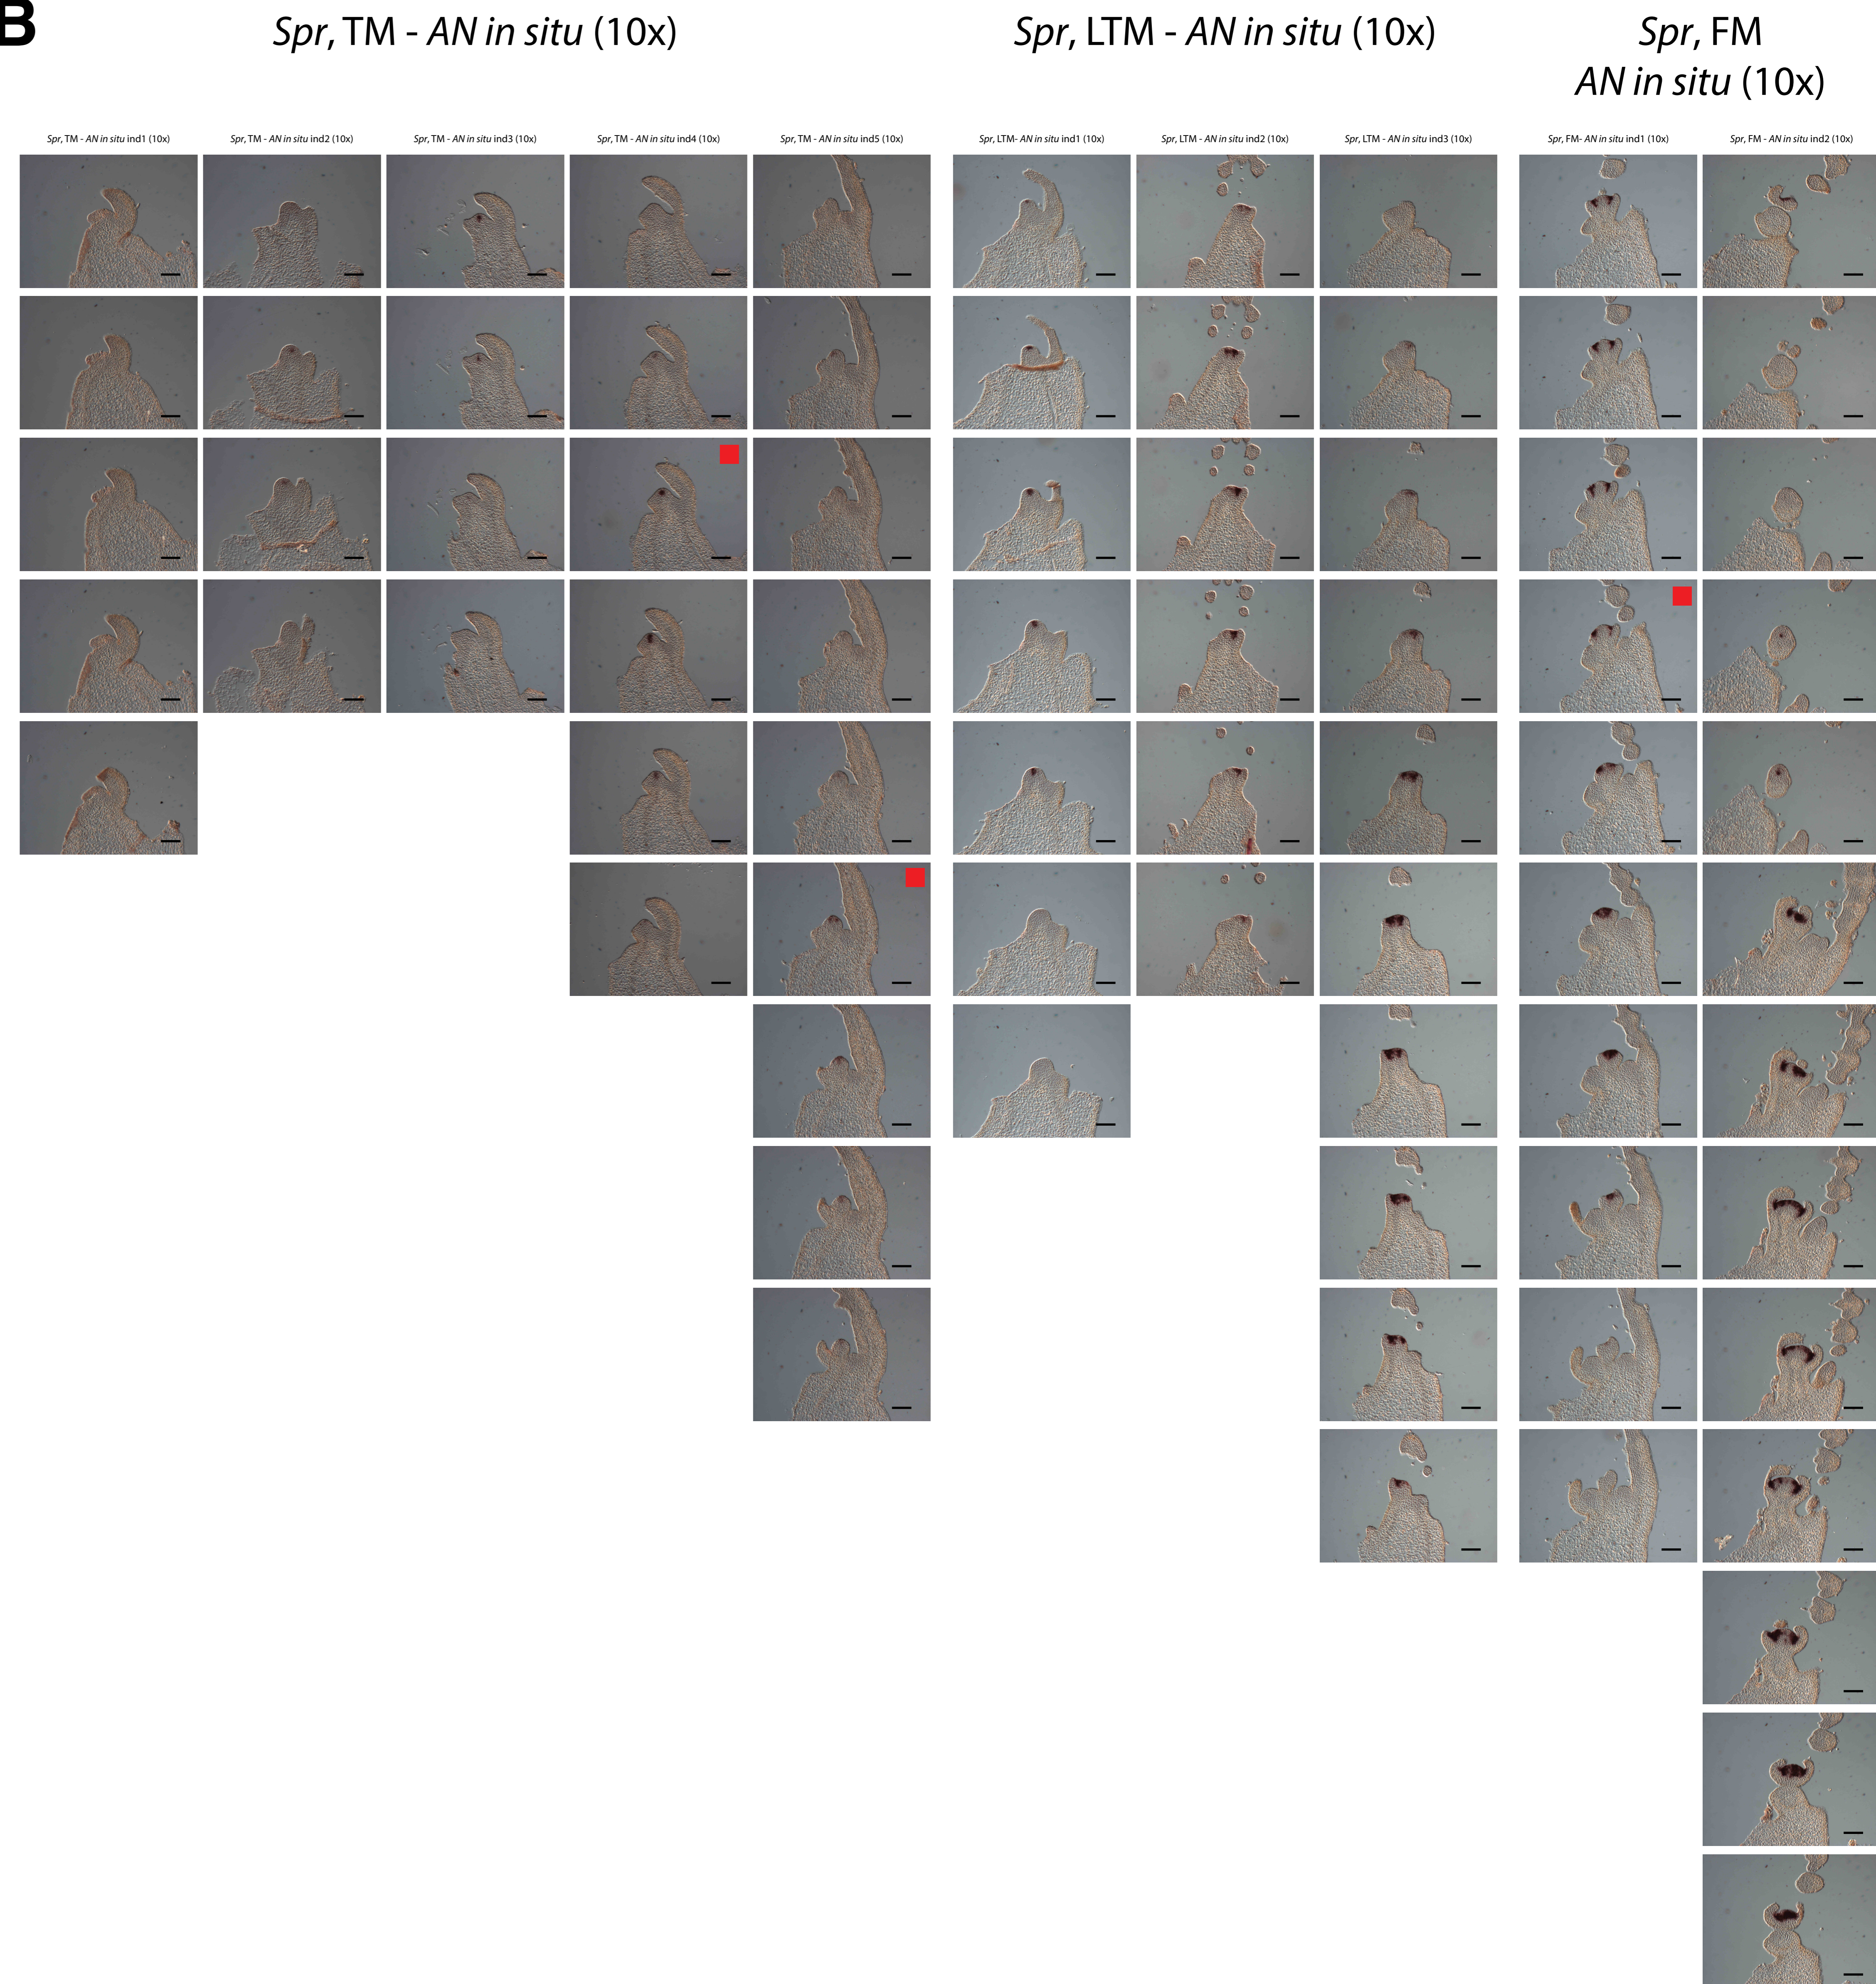

Supplement: supp_gr.207837.116_Supplemental_Fig_S15.pdf [file supp_gr.207837.116_Supplemental_Fig_S15.pdf]

# Supplemental Figure S8

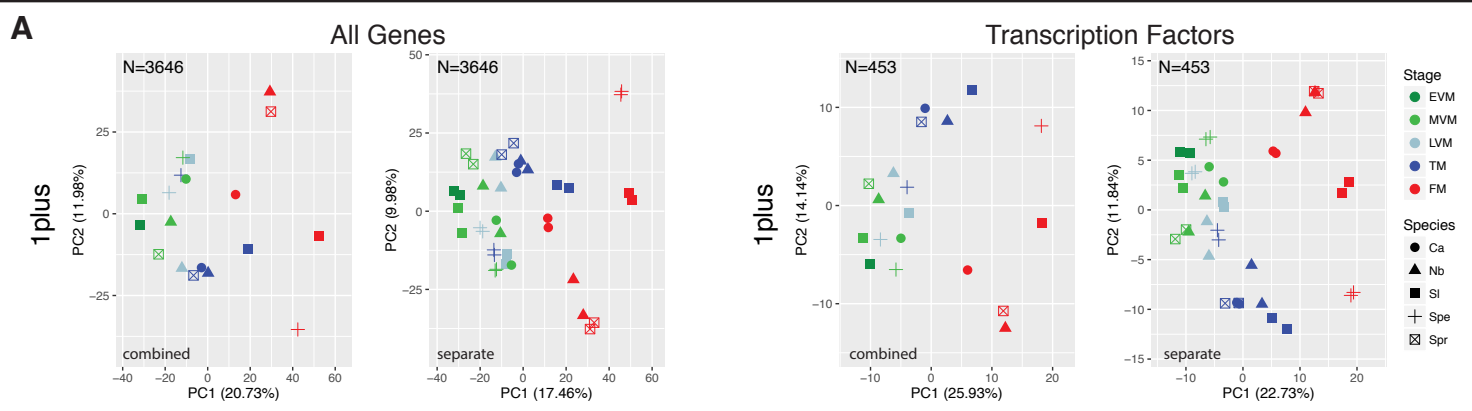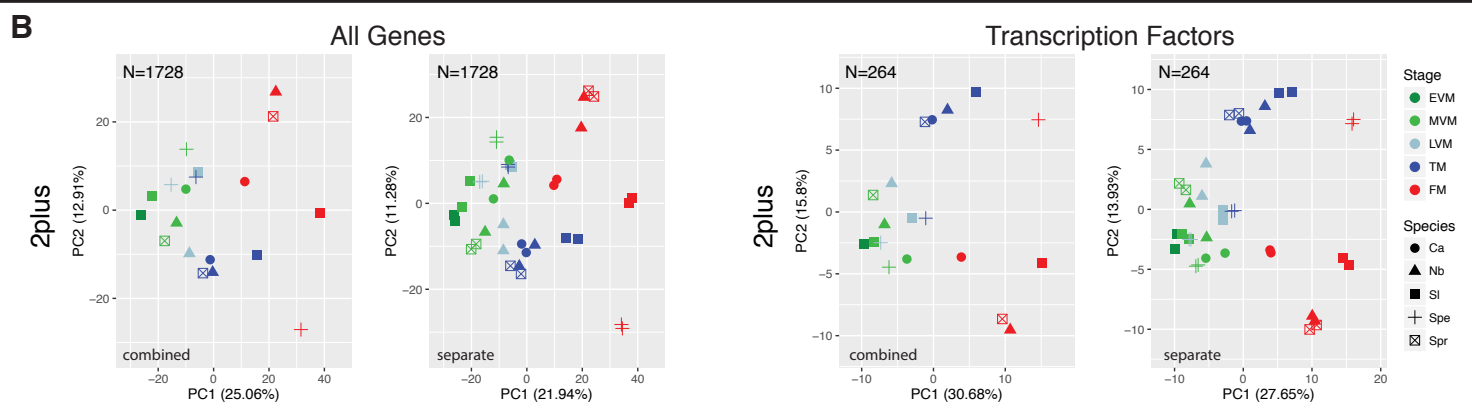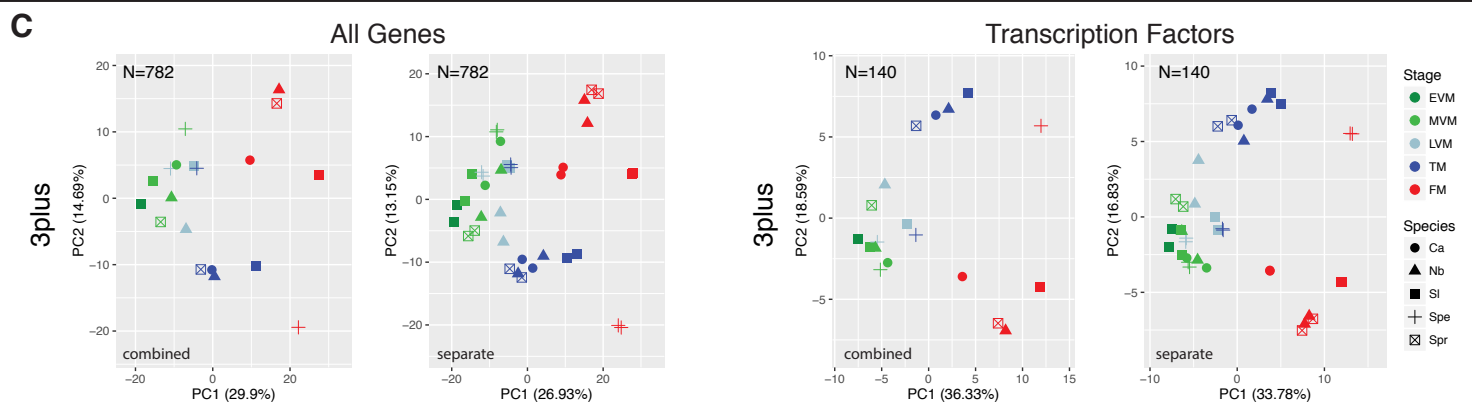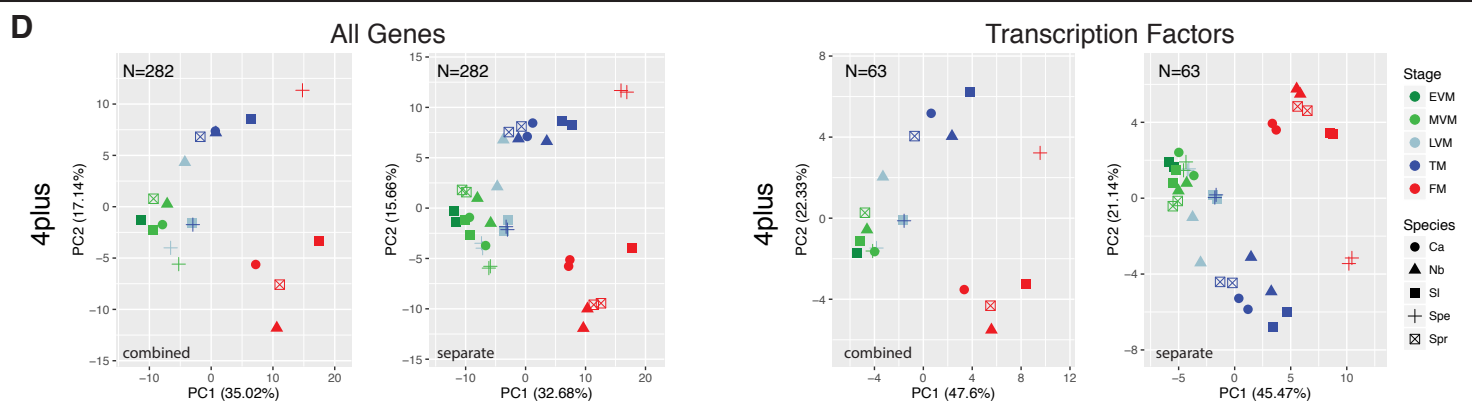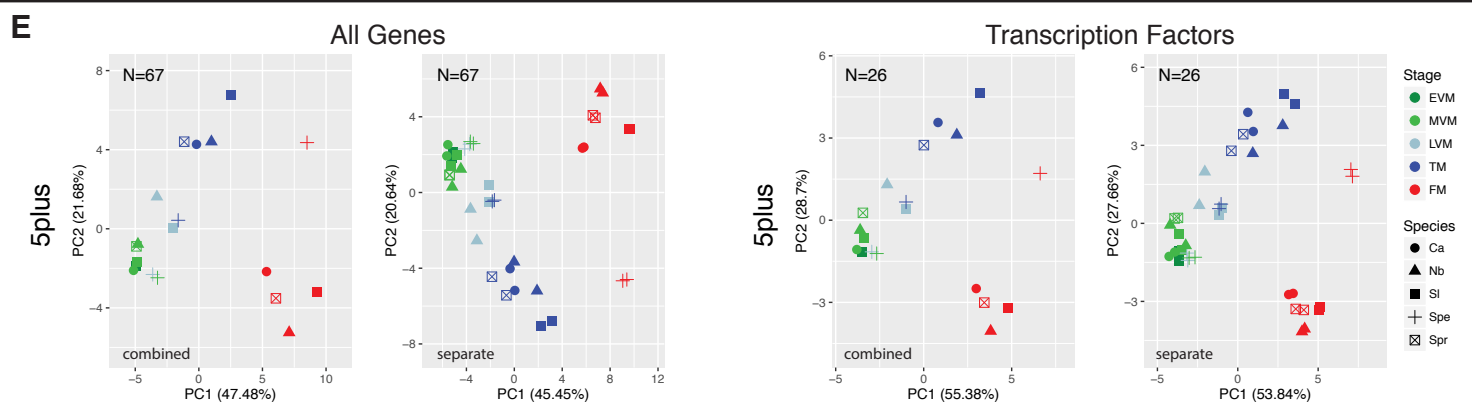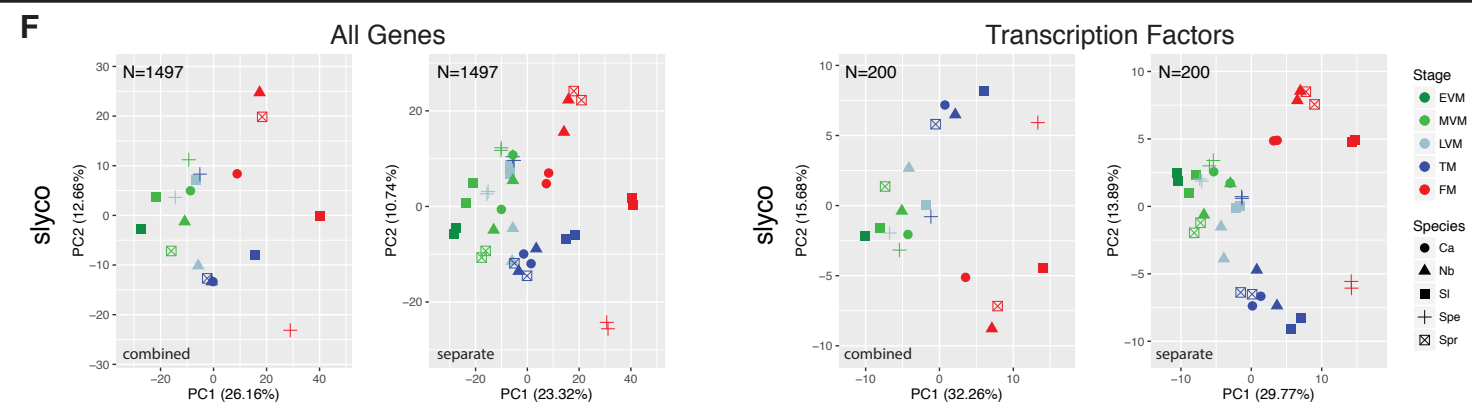

Supplement: supp_gr.207837.116_Supplemental_Fig_S8.pdf [file supp_gr.207837.116_Supplemental_Fig_S8.pdf]
